# Supplementary material for: β-caryophyllene regulates H3K36me3 to inhibit spore germination and mycelial growth of Fusarium proliferatum
Source: Research Square preprint supplement (doi:10.21203/rs.3.rs-5517661/v1), 2025-06-24
Supplement: Supplementary file 1 [file 529d8a8e81ff5d460d56bf0e.xlsx]

## Sheet: RNA-seq (DEGs)_BCP_vs_CK
GID	Protein_ID	log2FoldChange	pvalue	padj	direction
FPRO_05254	XP_031080947.1	7.62285	3.68978e-41	3.623e-37	up
FPRO_10634	XP_031081637.1	5.37108	2.93185e-33	1.43939e-29	up
FPRO_06104	XP_031079298.1	4.43899	9.97375e-33	3.26441e-29	up
FPRO_15335	XP_031086023.1	5.07959	1.80829e-32	4.4389e-29	up
FPRO_07195	XP_031078207.1	-6.13314	1.39459e-30	2.73869e-27	down
FPRO_05253	XP_031080946.1	8.04416	3.00274e-30	4.91399e-27	up
FPRO_00223	XP_031076247.1	-4.2805	1.06918e-26	1.49975e-23	down
FPRO_10985	XP_031081988.1	3.78661	6.44664e-25	7.91245e-22	up
FPRO_13392	XP_031088258.1	4.52083	7.26236e-25	7.92323e-22	up
FPRO_07193	XP_031078209.1	-3.64437	1.20419e-24	1.18239e-21	down
FPRO_08719	XP_031087879.1	6.49965	1.45125e-23	1.2038e-20	up
FPRO_02384	XP_031077949.1	4.23679	1.47119e-23	1.2038e-20	up
FPRO_01471	XP_031075002.1	4.45988	4.8806e-21	3.68635e-18	up
FPRO_07917	XP_031083758.1	3.80371	7.09946e-21	4.97926e-18	up
FPRO_11978	XP_031087063.1	4.44886	9.12464e-20	5.97299e-17	up
FPRO_02644	XP_031077689.1	-3.79482	2.74738e-19	1.68604e-16	down
FPRO_05309	XP_031081002.1	4.08978	6.68248e-19	3.85972e-16	up
FPRO_14009	XP_031084791.1	3.66815	9.92669e-19	5.41501e-16	up
FPRO_06743	XP_031078659.1	-3.07809	1.12399e-18	5.80866e-16	down
FPRO_06401	XP_031079001.1	3.95858	1.53372e-18	7.36746e-16	up
FPRO_03669	XP_031076664.1	-3.90139	1.63839e-18	7.36746e-16	down
FPRO_03000	XP_031077333.1	6.10734	1.76985e-18	7.36746e-16	up
FPRO_05252	XP_031080945.1	5.75165	1.80699e-18	7.36746e-16	up
FPRO_10979	XP_031081982.1	4.95831	1.84285e-18	7.36746e-16	up
FPRO_00841	XP_031075631.1	3.65874	1.87582e-18	7.36746e-16	up
FPRO_15765	XP_031085594.1	4.82916	3.648e-18	1.33908e-15	up
FPRO_00210	XP_031076260.1	5.12528	3.68215e-18	1.33908e-15	up
FPRO_13171	XP_031088038.1	5.26643	5.28142e-18	1.85208e-15	up
FPRO_03246	XP_031077087.1	4.16622	3.08671e-17	1.01458e-14	up
FPRO_13948	XP_031084730.1	-5.83618	3.09984e-17	1.01458e-14	down
FPRO_01752	XP_031074721.1	4.74531	3.35927e-17	1.06402e-14	up
FPRO_13294	XP_031088161.1	3.96736	4.70637e-17	1.44412e-14	up
FPRO_01104	XP_031075368.1	3.009	6.32068e-17	1.88069e-14	up
FPRO_06850	XP_031078552.1	-4.6706	1.20505e-16	3.4801e-14	down
FPRO_03658	XP_031076675.1	-3.16037	1.41883e-16	3.98044e-14	down
FPRO_05140	XP_031080833.1	5.09963	1.59077e-16	4.33883e-14	up
FPRO_14174	XP_031084955.1	2.80148	2.26689e-16	6.01584e-14	up
FPRO_12697	XP_031088620.1	6.78199	3.17949e-16	8.21564e-14	up
FPRO_05805	XP_031079596.1	3.57445	6.797e-16	1.71128e-13	up
FPRO_01460	XP_031075013.1	5.49666	8.24549e-16	2.02406e-13	up
FPRO_03650	XP_031076683.1	-3.14578	9.60523e-16	2.30033e-13	down
FPRO_02984	XP_031077349.1	4.4042	1.05263e-15	2.46089e-13	up
FPRO_14378	XP_031085159.1	3.53687	1.3541e-15	3.09207e-13	up
FPRO_01461	XP_031075012.1	5.04752	1.68972e-15	3.77076e-13	up
FPRO_06478	XP_031078924.1	3.54162	2.44619e-15	5.33759e-13	up
FPRO_00523	XP_031075947.1	3.60066	2.69307e-15	5.74853e-13	up
FPRO_09021	XP_031089741.1	5.00722	2.82795e-15	5.90802e-13	up
FPRO_03657	XP_031076676.1	-3.62908	8.59204e-15	1.75761e-12	down
FPRO_13204	XP_031088071.1	-4.98141	1.29827e-14	2.60156e-12	down
FPRO_06105	XP_031079297.1	3.691	1.52464e-14	2.99408e-12	up
FPRO_09451	XP_031082741.1	3.50741	2.22574e-14	4.28521e-12	up
FPRO_10527	XP_031081530.1	-3.00481	2.78918e-14	5.26672e-12	down
FPRO_13175	XP_031088042.1	-3.3099	3.00351e-14	5.56442e-12	down
FPRO_01085	XP_031075387.1	-4.36219	3.57329e-14	6.49744e-12	down
FPRO_11275	XP_031082277.1	6.20666	6.14873e-14	1.08273e-11	up
FPRO_08041	XP_031083634.1	3.05078	6.17505e-14	1.08273e-11	up
FPRO_04421	XP_031080117.1	3.13665	6.48703e-14	1.11136e-11	up
FPRO_09102	XP_031082393.1	4.59701	6.56472e-14	1.11136e-11	up
FPRO_01538	XP_031074935.1	3.3756	7.71238e-14	1.28352e-11	up
FPRO_03773	XP_031076560.1	-3.94405	8.59238e-14	1.40614e-11	down
FPRO_15176	XP_031086182.1	4.727	8.9578e-14	1.44191e-11	up
FPRO_13903	XP_031084685.1	5.39621	1.01851e-13	1.61302e-11	up
FPRO_00184	XP_031076286.1	-3.75972	1.04855e-13	1.63032e-11	down
FPRO_07192	XP_031078210.1	-3.39465	1.06264e-13	1.63032e-11	down
FPRO_12280	XP_031089356.1	4.56504	1.07937e-13	1.63051e-11	up
FPRO_06323	XP_031079079.1	2.68757	1.27889e-13	1.90264e-11	up
FPRO_08388	XP_031087548.1	4.91257	1.46814e-13	2.13402e-11	up
FPRO_06889	XP_031078513.1	-5.6155	1.47788e-13	2.13402e-11	down
FPRO_18077		-6.23233	1.6393e-13	2.33279e-11	down
FPRO_14458	XP_031085239.1	4.76912	1.81173e-13	2.54134e-11	up
FPRO_05040	XP_031080733.1	4.98127	2.27384e-13	3.14462e-11	up
FPRO_04997	XP_031080691.1	3.67109	2.33889e-13	3.18967e-11	up
FPRO_06663	XP_031078739.1	5.05343	2.44028e-13	3.28234e-11	up
FPRO_09689	XP_031082978.1	2.57224	2.92849e-13	3.88579e-11	up
FPRO_08478	XP_031087638.1	3.50685	2.98374e-13	3.90632e-11	up
FPRO_00664	XP_031075807.1	2.93865	3.46754e-13	4.47998e-11	up
FPRO_05777	XP_031079624.1	3.10959	3.64716e-13	4.65084e-11	up
FPRO_03488	XP_031076845.1	-3.01783	4.11976e-13	5.18615e-11	down
FPRO_04742	XP_031080438.1	2.98336	5.36848e-13	6.67255e-11	up
FPRO_12232	XP_031087315.1	-2.82439	5.47682e-13	6.72211e-11	down
FPRO_12028	XP_031087112.1	4.29921	5.82737e-13	7.06407e-11	up
FPRO_06844	XP_031078558.1	-4.3298	6.02248e-13	7.21156e-11	down
FPRO_05621	XP_031079780.1	-2.58595	6.32074e-13	7.47751e-11	down
FPRO_11999	XP_031087084.1	-3.59808	6.77662e-13	7.92138e-11	down
FPRO_15044	XP_031086314.1	-3.68679	9.17694e-13	1.0601e-10	down
FPRO_14219	XP_031085000.1	-4.79585	9.43092e-13	1.07677e-10	down
FPRO_15315	XP_031086043.1	5.84701	1.15096e-12	1.299e-10	up
FPRO_13216	XP_031088083.1	3.27103	1.29626e-12	1.44636e-10	up
FPRO_02842	XP_031077491.1	3.75333	1.39471e-12	1.53872e-10	up
FPRO_00079	XP_031076391.1	4.41584	1.57595e-12	1.71936e-10	up
FPRO_04862	XP_031080557.1	3.87923	2.01465e-12	2.17383e-10	up
FPRO_11227	XP_031082230.1	-3.97193	2.19544e-12	2.34316e-10	down
FPRO_07804	XP_031083871.1	3.21177	2.59634e-12	2.74123e-10	up
FPRO_01666	XP_031074807.1	2.5921	3.19725e-12	3.33977e-10	up
FPRO_08391	XP_031087551.1	2.52369	3.73348e-12	3.85885e-10	up
FPRO_02568	XP_031077765.1	2.64214	3.96295e-12	4.05335e-10	up
FPRO_08475	XP_031087635.1	3.41439	4.03316e-12	4.08264e-10	up
FPRO_02236	XP_031078096.1	2.38295	4.53824e-12	4.54703e-10	up
FPRO_03674	XP_031076659.1	3.01371	4.89194e-12	4.85192e-10	up
FPRO_15682	XP_031085677.1	3.24465	5.78214e-12	5.67748e-10	up
FPRO_07336	XP_031084338.1	4.71167	8.3747e-12	8.1417e-10	up
FPRO_01511	XP_031074962.1	-3.10641	8.66316e-12	8.33957e-10	down
FPRO_04100	XP_031089102.1	5.99161	1.00039e-11	9.53677e-10	up
FPRO_03170	XP_031077163.1	2.56815	1.06843e-11	1.00874e-09	up
FPRO_07194	XP_031078208.1	-3.95424	1.12152e-11	1.0389e-09	down
FPRO_11238	XP_031082241.1	5.00771	1.12153e-11	1.0389e-09	up
FPRO_01881	XP_031074592.1	3.54232	1.13836e-11	1.04382e-09	up
FPRO_13505	XP_031088371.1	-4.82689	1.1481e-11	1.04382e-09	down
FPRO_00096	XP_031076374.1	-5.21699	1.20832e-11	1.07956e-09	down
FPRO_11612	XP_031086699.1	-4.47462	1.20941e-11	1.07956e-09	down
FPRO_01015	XP_031075457.1	4.32056	1.27467e-11	1.12756e-09	up
FPRO_09418	XP_031082708.1	4.35931	1.32389e-11	1.16065e-09	up
FPRO_05015	XP_031080709.1	-2.94762	1.39058e-11	1.20833e-09	down
FPRO_13393	XP_031088259.1	3.22713	1.52225e-11	1.31114e-09	up
FPRO_13261	XP_031088128.1	2.67244	1.54151e-11	1.31618e-09	up
FPRO_09101	XP_031082392.1	4.29181	1.62896e-11	1.37886e-09	up
FPRO_13014	XP_031088937.1	4.00935	1.68124e-11	1.41095e-09	up
FPRO_03717	XP_031076616.1	-3.03045	1.69938e-11	1.41408e-09	down
FPRO_14220	XP_031085001.1	-3.20192	1.76071e-11	1.45281e-09	down
FPRO_12488	XP_031089565.1	-4.17542	1.83655e-11	1.50276e-09	down
FPRO_09528	XP_031082817.1	-3.14208	2.06596e-11	1.6724e-09	down
FPRO_15766	XP_031085593.1	4.22719	2.07794e-11	1.6724e-09	up
FPRO_15412	XP_031085947.1	4.85853	2.23666e-11	1.78551e-09	up
FPRO_12980	XP_031088903.1	-3.86593	2.39311e-11	1.89499e-09	down
FPRO_03786	XP_031076547.1	5.59356	2.7101e-11	2.12884e-09	up
FPRO_10667	XP_031081670.1	3.09463	3.03736e-11	2.36697e-09	up
FPRO_03772	XP_031076561.1	-3.76052	3.15217e-11	2.4371e-09	down
FPRO_08120	XP_031083555.1	-2.94641	3.32318e-11	2.54925e-09	down
FPRO_06591	XP_031078811.1	-2.35332	3.51062e-11	2.67215e-09	down
FPRO_03671	XP_031076662.1	-3.01229	3.74823e-11	2.83106e-09	down
FPRO_09099	XP_031082390.1	2.72681	4.38022e-11	3.25871e-09	up
FPRO_00282	XP_031076188.1	-2.93852	4.38078e-11	3.25871e-09	down
FPRO_05209	XP_031080902.1	-3.30986	4.60164e-11	3.39726e-09	down
FPRO_08493	XP_031087653.1	2.43085	4.64972e-11	3.40713e-09	up
FPRO_05343	XP_031081036.1	-4.41316	4.74981e-11	3.4547e-09	down
FPRO_10428	XP_031081433.1	3.63369	5.27647e-11	3.80953e-09	up
FPRO_14168	XP_031084949.1	4.21356	5.45752e-11	3.91149e-09	up
FPRO_00335	XP_031076135.1	-3.50018	5.93975e-11	4.22626e-09	down
FPRO_00805	XP_031075666.1	3.48248	6.05556e-11	4.27767e-09	up
FPRO_09444	XP_031082734.1	2.39963	7.03315e-11	4.93275e-09	up
FPRO_13507	XP_031088373.1	-4.19277	7.94812e-11	5.53494e-09	down
FPRO_11991	XP_031087076.1	2.93835	8.22251e-11	5.68569e-09	up
FPRO_02751	XP_031077582.1	3.31507	8.95814e-11	6.15104e-09	up
FPRO_09490	XP_031082780.1	3.12831	1.04077e-10	7.05043e-09	up
FPRO_06584	XP_031078818.1	-3.32023	1.04116e-10	7.05043e-09	down
FPRO_12758	XP_031088681.1	4.36867	1.20835e-10	8.12658e-09	up
FPRO_01861	XP_031074612.1	-3.57285	1.249e-10	8.3428e-09	down
FPRO_10936	XP_031081939.1	-3.50876	1.4403e-10	9.55558e-09	down
FPRO_03247	XP_031077086.1	2.35608	1.46032e-10	9.62342e-09	up
FPRO_05212	XP_031080905.1	3.23556	1.47723e-10	9.66998e-09	up
FPRO_03739	XP_031076594.1	3.7292	1.50648e-10	9.79613e-09	up
FPRO_00961	XP_031075511.1	3.56991	1.55613e-10	1.00524e-08	up
FPRO_06926	XP_031078476.1	4.40802	1.60864e-10	1.03237e-08	up
FPRO_12281	XP_031089357.1	2.90831	1.74671e-10	1.11369e-08	up
FPRO_14683	XP_031085465.1	-3.98542	1.84731e-10	1.17024e-08	down
FPRO_13133	XP_031088000.1	-3.53331	1.88804e-10	1.18838e-08	down
FPRO_06994	XP_031078408.1	-4.2049	1.97491e-10	1.23514e-08	down
FPRO_13508	XP_031088374.1	-3.95106	2.1975e-10	1.36212e-08	down
FPRO_06849	XP_031078553.1	-3.38061	2.2057e-10	1.36212e-08	down
FPRO_13338	XP_031088204.1	3.1874	2.22506e-10	1.36379e-08	up
FPRO_00426	XP_031076044.1	-4.54538	2.23617e-10	1.36379e-08	down
FPRO_06607	XP_031078795.1	4.35048	2.33537e-10	1.41549e-08	up
FPRO_04103	XP_031089099.1	3.65766	2.3752e-10	1.4308e-08	up
FPRO_09678	XP_031082967.1	3.26495	2.4965e-10	1.4947e-08	up
FPRO_00498	XP_031075972.1	-2.77531	2.57146e-10	1.53025e-08	down
FPRO_15485	XP_031085874.1	3.96308	2.68662e-10	1.58915e-08	up
FPRO_09770	XP_031083058.1	3.5743	2.72159e-10	1.6002e-08	up
FPRO_06969	XP_031078433.1	4.85186	3.07192e-10	1.79543e-08	up
FPRO_08499	XP_031087659.1	3.25852	3.25724e-10	1.89247e-08	up
FPRO_13459	XP_031088325.1	3.8245	3.31471e-10	1.91454e-08	up
FPRO_00589	XP_031075881.1	2.1837	3.4394e-10	1.97494e-08	up
FPRO_09919	XP_031083207.1	2.64413	3.54621e-10	2.02443e-08	up
FPRO_09226	XP_031082517.1	-3.43262	3.65894e-10	2.06984e-08	down
FPRO_00735	XP_031075736.1	3.57334	3.66791e-10	2.06984e-08	up
FPRO_05870	XP_031079531.1	3.2825	3.97829e-10	2.23216e-08	up
FPRO_13367	XP_031088233.1	2.69967	4.31658e-10	2.40821e-08	up
FPRO_04633	XP_031080329.1	2.56303	4.34411e-10	2.40987e-08	up
FPRO_04317	XP_031080013.1	-2.79378	4.72565e-10	2.60681e-08	down
FPRO_11655	XP_031086742.1	-2.94909	4.81108e-10	2.6391e-08	down
FPRO_01084	XP_031075388.1	-3.28311	5.14893e-10	2.80874e-08	down
FPRO_12695	XP_031088618.1	5.83532	5.21395e-10	2.8285e-08	up
FPRO_02181	XP_031078151.1	-2.91484	5.45953e-10	2.94544e-08	down
FPRO_10854	XP_031081857.1	3.97087	5.5161e-10	2.95971e-08	up
FPRO_02525	XP_031077808.1	-2.47063	5.73346e-10	3.05961e-08	down
FPRO_08409	XP_031087569.1	3.16084	5.93299e-10	3.14897e-08	up
FPRO_05057	XP_031080750.1	3.07667	6.25369e-10	3.30134e-08	up
FPRO_01475	XP_031074998.1	-2.77689	6.47161e-10	3.39811e-08	down
FPRO_15698	XP_031085661.1	-3.729	6.62784e-10	3.46164e-08	down
FPRO_01144	XP_031075328.1	3.48921	6.74148e-10	3.50236e-08	up
FPRO_06993	XP_031078409.1	-4.15908	7.08984e-10	3.66395e-08	down
FPRO_02486	XP_031077847.1	3.5776	7.29764e-10	3.7516e-08	up
FPRO_10815	XP_031081818.1	2.46098	7.66038e-10	3.91757e-08	up
FPRO_07875	XP_031083800.1	-2.82007	7.88308e-10	4.01057e-08	down
FPRO_03489	XP_031076844.1	-2.90744	8.07576e-10	4.08742e-08	down
FPRO_03660	XP_031076673.1	3.33416	8.5888e-10	4.32479e-08	up
FPRO_13140	XP_031088007.1	-3.39209	8.7025e-10	4.3384e-08	down
FPRO_01882	XP_031074591.1	3.93954	8.7042e-10	4.3384e-08	up
FPRO_14179	XP_031084960.1	-3.60571	8.9197e-10	4.42336e-08	down
FPRO_02277	XP_031078056.1	3.03588	9.15734e-10	4.51839e-08	up
FPRO_08457	XP_031087617.1	2.85306	1.06e-09	5.20407e-08	up
FPRO_14446	XP_031085227.1	-3.02375	1.18719e-09	5.79953e-08	down
FPRO_07211	XP_031078191.1	-3.41378	1.2143e-09	5.90257e-08	down
FPRO_07838	XP_031083837.1	2.4958	1.29352e-09	6.25667e-08	up
FPRO_02286	XP_031078047.1	-4.22024	1.33118e-09	6.40729e-08	down
FPRO_12097	XP_031087181.1	4.49048	1.36438e-09	6.53502e-08	up
FPRO_02584	XP_031077749.1	2.71906	1.58757e-09	7.56716e-08	up
FPRO_10955	XP_031081958.1	-2.3258	1.67951e-09	7.96672e-08	down
FPRO_06029	XP_031079373.1	3.87249	1.85704e-09	8.76649e-08	up
FPRO_03245	XP_031077088.1	2.12472	1.89415e-09	8.89887e-08	up
FPRO_00183	XP_031076287.1	-3.16716	1.91705e-09	8.9636e-08	down
FPRO_05716	XP_031079685.1	-3.11051	1.97741e-09	9.20199e-08	down
FPRO_04596	XP_031080292.1	-2.36599	2.0147e-09	9.3313e-08	down
FPRO_09483	XP_031082773.1	3.01183	2.18353e-09	1.0048e-07	up
FPRO_00072	XP_031076398.1	3.86949	2.18991e-09	1.0048e-07	up
FPRO_12873	XP_031088796.1	3.56064	2.22737e-09	1.01303e-07	up
FPRO_08943	XP_031089819.1	-2.98197	2.22848e-09	1.01303e-07	down
FPRO_05437	XP_031081130.1	8.50837	2.48405e-09	1.12401e-07	up
FPRO_06494	XP_031078908.1	-4.72001	2.86829e-09	1.29192e-07	down
FPRO_05059	XP_031080752.1	2.89209	2.88392e-09	1.29302e-07	up
FPRO_07628	XP_031084046.1	3.38312	3.04319e-09	1.35778e-07	up
FPRO_11021	XP_031082024.1	2.31317	3.056e-09	1.35778e-07	up
FPRO_01014	XP_031075458.1	2.95292	3.25592e-09	1.44008e-07	up
FPRO_13661	XP_031088525.1	-2.99444	3.33634e-09	1.46904e-07	down
FPRO_04741	XP_031080437.1	2.50865	3.44342e-09	1.50942e-07	up
FPRO_06603	XP_031078799.1	-2.85117	3.85602e-09	1.67611e-07	down
FPRO_14180	XP_031084961.1	-4.35577	3.86376e-09	1.67611e-07	down
FPRO_06722	XP_031078680.1	-3.30186	3.8749e-09	1.67611e-07	down
FPRO_10545	XP_031081548.1	3.57018	4.19695e-09	1.80745e-07	up
FPRO_02773	XP_031077560.1	-2.38055	4.66386e-09	1.99976e-07	down
FPRO_08071	XP_031083604.1	2.2965	5.01694e-09	2.13485e-07	up
FPRO_15175	XP_031086183.1	3.42293	5.0224e-09	2.13485e-07	up
FPRO_02915	XP_031077418.1	3.07736	5.29272e-09	2.24005e-07	up
FPRO_08585	XP_031087745.1	5.03554	5.32812e-09	2.24535e-07	up
FPRO_14191	XP_031084972.1	-4.57252	5.39534e-09	2.26397e-07	down
FPRO_15314	XP_031086044.1	4.18388	5.46845e-09	2.28488e-07	up
FPRO_00501	XP_031075969.1	2.33392	5.68054e-09	2.36344e-07	up
FPRO_07981	XP_031083694.1	2.62374	5.93252e-09	2.45787e-07	up
FPRO_09286	XP_031082577.1	2.40813	5.99006e-09	2.47128e-07	up
FPRO_02693	XP_031077640.1	3.2143	6.12389e-09	2.51592e-07	up
FPRO_02182	XP_031078150.1	-2.78685	6.2171e-09	2.54357e-07	down
FPRO_03128	XP_031077205.1	-2.70864	6.59816e-09	2.68742e-07	down
FPRO_12631	XP_031088554.1	4.02996	6.62345e-09	2.68742e-07	up
FPRO_06452	XP_031078950.1	3.40975	6.70991e-09	2.7113e-07	up
FPRO_04251	XP_031079947.1	4.0979	6.90408e-09	2.77833e-07	up
FPRO_05699	XP_031079702.1	2.54887	7.27612e-09	2.91609e-07	up
FPRO_07957	XP_031083718.1	2.98993	7.45586e-09	2.97598e-07	up
FPRO_05045	XP_031080738.1	-2.18588	7.6363e-09	3.03566e-07	down
FPRO_06158	XP_031079244.1	-2.0003	7.68194e-09	3.04149e-07	down
FPRO_04430	XP_031080126.1	2.48901	8.18692e-09	3.22841e-07	up
FPRO_02400	XP_031077933.1	-3.61603	8.52292e-09	3.34746e-07	down
FPRO_06910	XP_031078492.1	-7.63869	8.63061e-09	3.37625e-07	down
FPRO_10271	XP_031081275.1	-2.43321	8.78025e-09	3.42116e-07	down
FPRO_07946	XP_031083729.1	-2.25222	9.0368e-09	3.50721e-07	down
FPRO_15043	XP_031086315.1	-2.6745	9.36603e-09	3.62067e-07	down
FPRO_06732	XP_031078670.1	2.18651	9.67404e-09	3.72507e-07	up
FPRO_07969	XP_031083706.1	3.984	1.09773e-08	4.21038e-07	up
FPRO_03131	XP_031077202.1	2.37067	1.10315e-08	4.21471e-07	up
FPRO_13693	XP_031084475.1	-4.08857	1.16785e-08	4.4446e-07	down
FPRO_06594	XP_031078808.1	-4.36827	1.18543e-08	4.49409e-07	down
FPRO_12960	XP_031088883.1	-5.51834	1.25797e-08	4.75077e-07	down
FPRO_01651	XP_031074822.1	-2.32284	1.26857e-08	4.77244e-07	down
FPRO_06098	XP_031079304.1	3.45225	1.40432e-08	5.26297e-07	up
FPRO_14591	XP_031085373.1	5.34639	1.41543e-08	5.26496e-07	up
FPRO_13149	XP_031088016.1	3.41532	1.41557e-08	5.26496e-07	up
FPRO_05824	XP_031079577.1	2.59236	1.49445e-08	5.53735e-07	up
FPRO_08573	XP_031087733.1	-2.67946	1.50939e-08	5.5717e-07	down
FPRO_13427	XP_031088293.1	4.12866	1.53394e-08	5.6373e-07	up
FPRO_08494	XP_031087654.1	2.40111	1.53864e-08	5.6373e-07	up
FPRO_00503	XP_031075967.1	2.43356	1.5677e-08	5.7224e-07	up
FPRO_01028	XP_031075444.1	1.92729	1.64735e-08	5.99088e-07	up
FPRO_12029	XP_031087113.1	5.56085	1.70763e-08	6.18718e-07	up
FPRO_05865	XP_031079536.1	3.19094	1.71706e-08	6.19845e-07	up
FPRO_03496	XP_031076837.1	4.67344	1.72797e-08	6.21501e-07	up
FPRO_06728	XP_031078674.1	-4.20403	1.73874e-08	6.2309e-07	down
FPRO_05731	XP_031079670.1	-3.3484	1.80736e-08	6.45324e-07	down
FPRO_12738	XP_031088661.1	-3.25818	1.92401e-08	6.84486e-07	down
FPRO_06453	XP_031078949.1	2.71084	1.99924e-08	7.08682e-07	up
FPRO_12285	XP_031089361.1	-4.30916	2.0337e-08	7.18306e-07	down
FPRO_15076	XP_031086282.1	2.78634	2.09685e-08	7.37955e-07	up
FPRO_06061	XP_031079341.1	-3.77577	2.23135e-08	7.82487e-07	down
FPRO_07794	XP_031083880.1	1.86153	2.29288e-08	8.01201e-07	up
FPRO_06733	XP_031078669.1	3.23139	2.36782e-08	8.24454e-07	up
FPRO_08103	XP_031083572.1	2.78394	2.43339e-08	8.44291e-07	up
FPRO_00097	XP_031076373.1	-4.48217	2.56246e-08	8.85944e-07	down
FPRO_06515	XP_031078887.1	-2.7015	2.576e-08	8.86816e-07	down
FPRO_01650	XP_031074823.1	-2.93966	2.58917e-08	8.86816e-07	down
FPRO_01584	XP_031074889.1	4.19839	2.59208e-08	8.86816e-07	up
FPRO_00182	XP_031076288.1	-2.17955	2.62012e-08	8.93296e-07	down
FPRO_13506	XP_031088372.1	-3.88465	2.63362e-08	8.94794e-07	down
FPRO_09527	XP_031082816.1	-3.40945	2.66091e-08	9.00947e-07	down
FPRO_04871	XP_031080566.1	3.00615	2.74034e-08	9.24651e-07	up
FPRO_10262	XP_031081265.1	3.68335	2.86669e-08	9.63975e-07	up
FPRO_15486	XP_031085873.1	3.14964	2.94126e-08	9.85673e-07	up
FPRO_14584	XP_031085366.1	4.06625	3.20503e-08	1.07041e-06	up
FPRO_09861	XP_031083149.1	-2.3499	3.32257e-08	1.10472e-06	down
FPRO_10961	XP_031081964.1	3.1699	3.33025e-08	1.10472e-06	up
FPRO_13985	XP_031084767.1	-4.3709	3.3589e-08	1.11047e-06	down
FPRO_03327	XP_031077006.1	3.04709	3.49035e-08	1.14705e-06	up
FPRO_09529	XP_031082818.1	-3.2131	3.49656e-08	1.14705e-06	down
FPRO_07320	XP_031084354.1	-6.40904	3.50459e-08	1.14705e-06	down
FPRO_05849	XP_031079552.1	2.56352	3.90971e-08	1.2707e-06	up
FPRO_13463	XP_031088329.1	-8.3044	3.92424e-08	1.2707e-06	down
FPRO_09918	XP_031083206.1	3.57807	3.93252e-08	1.2707e-06	up
FPRO_10785	XP_031081788.1	3.59122	3.93415e-08	1.2707e-06	up
FPRO_05837	XP_031079564.1	2.98876	4.05089e-08	1.30412e-06	up
FPRO_13192	XP_031088059.1	2.02907	4.08968e-08	1.31231e-06	up
FPRO_11915	XP_031087000.1	2.9752	4.21766e-08	1.34896e-06	up
FPRO_14273	XP_031085054.1	3.38288	4.41575e-08	1.40773e-06	up
FPRO_00181	XP_031076289.1	-4.42568	4.43504e-08	1.40931e-06	down
FPRO_11079	XP_031082082.1	-2.4506	4.58937e-08	1.45365e-06	down
FPRO_07088	XP_031078314.1	5.66399	4.68809e-08	1.48014e-06	up
FPRO_12810	XP_031088733.1	-2.22303	4.79099e-08	1.50778e-06	down
FPRO_01329	XP_031075144.1	3.93498	4.81183e-08	1.5095e-06	up
FPRO_08188	XP_031087348.1	3.27556	4.94375e-08	1.54359e-06	up
FPRO_08951	XP_031089811.1	5.4393	4.95193e-08	1.54359e-06	up
FPRO_13139	XP_031088006.1	-3.40708	5.05279e-08	1.57004e-06	down
FPRO_08119	XP_031083556.1	-2.32328	5.20149e-08	1.61115e-06	down
FPRO_10663	XP_031081666.1	3.1346	5.26088e-08	1.62442e-06	up
FPRO_02062	XP_031074412.1	-3.29779	5.34126e-08	1.64351e-06	down
FPRO_04151	XP_031089051.1	2.08063	5.35618e-08	1.64351e-06	up
FPRO_08680	XP_031087840.1	-4.09926	5.69468e-08	1.74193e-06	down
FPRO_03563	XP_031076770.1	-3.11836	5.8774e-08	1.79224e-06	down
FPRO_12507	XP_031089583.1	-4.68161	5.92571e-08	1.80138e-06	down
FPRO_02401	XP_031077932.1	-3.53852	6.31226e-08	1.91297e-06	down
FPRO_02054	XP_031074420.1	4.56673	6.44468e-08	1.94709e-06	up
FPRO_01380	XP_031075093.1	-2.20721	6.83986e-08	2.06014e-06	down
FPRO_02372	XP_031077961.1	-2.63651	7.03238e-08	2.11165e-06	down
FPRO_05776	XP_031079625.1	3.18886	7.11733e-08	2.13064e-06	up
FPRO_06003	XP_031079399.1	2.77106	7.43093e-08	2.21776e-06	up
FPRO_09862	XP_031083150.1	-1.74319	7.97418e-08	2.37268e-06	down
FPRO_01466	XP_031075007.1	2.28	8.30814e-08	2.4611e-06	up
FPRO_07757	XP_031083917.1	2.71024	8.32147e-08	2.4611e-06	up
FPRO_11004	XP_031082007.1	2.61708	8.39845e-08	2.47641e-06	up
FPRO_04381	XP_031080077.1	2.63617	8.86519e-08	2.60621e-06	up
FPRO_05366	XP_031081059.1	-7.97213	1.02548e-07	3.00572e-06	down
FPRO_06627	XP_031078775.1	2.38648	1.08424e-07	3.1685e-06	up
FPRO_13202	XP_031088069.1	-2.8557	1.09961e-07	3.1945e-06	down
FPRO_07827	XP_031083848.1	-2.0033	1.09965e-07	3.1945e-06	down
FPRO_04096	XP_031089106.1	2.51726	1.12579e-07	3.26082e-06	up
FPRO_02287	XP_031078046.1	-3.79534	1.12952e-07	3.26199e-06	down
FPRO_03451	XP_031076882.1	3.10066	1.13709e-07	3.27422e-06	up
FPRO_02985	XP_031077348.1	2.738	1.16784e-07	3.35292e-06	up
FPRO_03149	XP_031077184.1	2.92253	1.18743e-07	3.39924e-06	up
FPRO_03743	XP_031076590.1	4.3683	1.19785e-07	3.41909e-06	up
FPRO_03403	XP_031076930.1	2.54334	1.20677e-07	3.43457e-06	up
FPRO_06542	XP_031078860.1	-3.13314	1.26001e-07	3.57572e-06	down
FPRO_05785	XP_031079616.1	2.72564	1.28563e-07	3.63793e-06	up
FPRO_01880	XP_031074593.1	2.79593	1.31178e-07	3.69925e-06	up
FPRO_03267	XP_031077066.1	-2.24003	1.31484e-07	3.69925e-06	down
FPRO_01345	XP_031075128.1	2.43147	1.33365e-07	3.74145e-06	up
FPRO_09307	XP_031082598.1	3.44719	1.36217e-07	3.81058e-06	up
FPRO_09261	XP_031082552.1	3.02114	1.40426e-07	3.91716e-06	up
FPRO_10270	XP_031081274.1	-2.02465	1.41648e-07	3.94006e-06	down
FPRO_03259	XP_031077074.1	-2.65466	1.42871e-07	3.96286e-06	down
FPRO_03210	XP_031077123.1	-3.21485	1.47412e-07	4.07729e-06	down
FPRO_06028	XP_031079374.1	3.15823	1.50757e-07	4.15809e-06	up
FPRO_09882	XP_031083170.1	-2.39454	1.53041e-07	4.20927e-06	down
FPRO_07333	XP_031084341.1	7.56867	1.54485e-07	4.23712e-06	up
FPRO_02278	XP_031078055.1	2.97513	1.55373e-07	4.24959e-06	up
FPRO_13358	XP_031088224.1	2.24921	1.66831e-07	4.54423e-06	up
FPRO_09700	XP_031082988.1	2.67137	1.67409e-07	4.54423e-06	up
FPRO_11240	XP_031082243.1	-3.45079	1.67533e-07	4.54423e-06	down
FPRO_06664	XP_031078738.1	3.87966	1.70074e-07	4.60043e-06	up
FPRO_10590	XP_031081593.1	2.95359	1.71255e-07	4.61964e-06	up
FPRO_02653	XP_031077680.1	-1.93654	1.72906e-07	4.65142e-06	down
FPRO_11659	XP_031086746.1	2.31481	1.76996e-07	4.73721e-06	up
FPRO_05082	XP_031080775.1	2.45901	1.77298e-07	4.73721e-06	up
FPRO_07729	XP_031083945.1	5.346	1.77543e-07	4.73721e-06	up
FPRO_01719	XP_031074754.1	-2.8306	1.82003e-07	4.84305e-06	down
FPRO_14272	XP_031085053.1	3.30511	1.95538e-07	5.18916e-06	up
FPRO_09425	XP_031082715.1	2.14589	1.96314e-07	5.19571e-06	up
FPRO_10094	XP_031083382.1	-3.25875	1.98852e-07	5.24872e-06	down
FPRO_11045	XP_031082048.1	2.53483	2.00783e-07	5.28548e-06	up
FPRO_07700	XP_031083974.1	3.04135	2.02463e-07	5.31548e-06	up
FPRO_13716	XP_031084498.1	4.28122	2.04074e-07	5.34348e-06	up
FPRO_11738	XP_031086824.1	3.29399	2.08444e-07	5.43769e-06	up
FPRO_04188	XP_031089014.1	3.61146	2.0878e-07	5.43769e-06	up
FPRO_09177	XP_031082468.1	-2.0657	2.14019e-07	5.5594e-06	down
FPRO_11766	XP_031086852.1	2.29969	2.18791e-07	5.66835e-06	up
FPRO_03013	XP_031077320.1	3.00545	2.20927e-07	5.7063e-06	up
FPRO_11152	XP_031082155.1	4.22734	2.21417e-07	5.7063e-06	up
FPRO_00235	XP_031076235.1	3.02067	2.22931e-07	5.73027e-06	up
FPRO_13891	XP_031084673.1	-3.35891	2.28461e-07	5.8548e-06	down
FPRO_13637	XP_031088501.1	-2.75297	2.28968e-07	5.8548e-06	down
FPRO_09953	XP_031083241.1	3.59874	2.36211e-07	6.02429e-06	up
FPRO_08987	XP_031089775.1	-2.15386	2.41961e-07	6.15497e-06	down
FPRO_15017	XP_031086341.1	3.59964	2.47273e-07	6.25518e-06	up
FPRO_12041	XP_031087125.1	-2.38117	2.47362e-07	6.25518e-06	down
FPRO_05976	XP_031079426.1	3.37019	2.48036e-07	6.25518e-06	up
FPRO_06374	XP_031079028.1	1.96866	2.48449e-07	6.25518e-06	up
FPRO_06531	XP_031078871.1	-3.43673	2.50515e-07	6.29107e-06	down
FPRO_01888	XP_031074585.1	2.75015	2.57784e-07	6.44838e-06	up
FPRO_07980	XP_031083695.1	2.25879	2.58093e-07	6.44838e-06	up
FPRO_10734	XP_031081737.1	-2.07063	2.7489e-07	6.85062e-06	down
FPRO_04095	XP_031089107.1	3.12191	2.96149e-07	7.35603e-06	up
FPRO_11049	XP_031082052.1	-2.07905	2.96669e-07	7.35603e-06	down
FPRO_13205	XP_031088072.1	2.31463	3.33789e-07	8.2556e-06	up
FPRO_03949	XP_031089253.1	-4.8358	3.34744e-07	8.25842e-06	down
FPRO_11105	XP_031082108.1	2.16657	3.42357e-07	8.42507e-06	up
FPRO_09879	XP_031083167.1	2.40631	3.43248e-07	8.42588e-06	up
FPRO_09463	XP_031082753.1	2.94627	3.4694e-07	8.49527e-06	up
FPRO_06507	XP_031078895.1	2.31976	3.5157e-07	8.58724e-06	up
FPRO_07602	XP_031084072.1	2.83982	3.60952e-07	8.79451e-06	up
FPRO_06856	XP_031078546.1	-4.0718	3.62767e-07	8.81685e-06	down
FPRO_04341	XP_031080037.1	3.00111	3.69884e-07	8.95991e-06	up
FPRO_15192	XP_031086166.1	-3.631	3.70478e-07	8.95991e-06	down
FPRO_11765	XP_031086851.1	2.14415	3.80475e-07	9.17907e-06	up
FPRO_09182	XP_031082473.1	2.12239	3.85937e-07	9.28802e-06	up
FPRO_00209	XP_031076261.1	2.35605	3.88814e-07	9.3344e-06	up
FPRO_05007	XP_031080701.1	-1.96678	3.92692e-07	9.4045e-06	down
FPRO_09894	XP_031083182.1	4.47271	3.95694e-07	9.44916e-06	up
FPRO_10827	XP_031081830.1	-2.17622	3.96482e-07	9.44916e-06	down
FPRO_06014	XP_031079388.1	-3.18704	4.12422e-07	9.80526e-06	down
FPRO_10446	XP_031081451.1	-2.80775	4.13592e-07	9.80933e-06	down
FPRO_02836	XP_031077497.1	-3.4585	4.15716e-07	9.81262e-06	down
FPRO_06920	XP_031078482.1	2.53583	4.1573e-07	9.81262e-06	up
FPRO_10238	XP_031081241.1	2.65677	4.34178e-07	1.02235e-05	up
FPRO_05427	XP_031081120.1	7.51274	4.3651e-07	1.02538e-05	up
FPRO_12150	XP_031087234.1	2.81804	4.52988e-07	1.06155e-05	up
FPRO_01293	XP_031075180.1	-2.08397	4.67946e-07	1.09399e-05	down
FPRO_01002	XP_031075470.1	-2.39634	4.71856e-07	1.10051e-05	down
FPRO_04357	XP_031080053.1	2.49288	4.87907e-07	1.13525e-05	up
FPRO_09147	XP_031082438.1	7.39677	4.89125e-07	1.1354e-05	up
FPRO_10119	XP_031083407.1	-3.31936	4.9087e-07	1.13676e-05	down
FPRO_09044	XP_031089718.1	-2.70167	5.02913e-07	1.16098e-05	down
FPRO_03498	XP_031076835.1	-2.84182	5.03696e-07	1.16098e-05	down
FPRO_03127	XP_031077206.1	-2.49891	5.0538e-07	1.16214e-05	down
FPRO_11721	XP_031086808.1	3.94876	5.13601e-07	1.17828e-05	up
FPRO_15512	XP_031085847.1	7.47993	5.21807e-07	1.19432e-05	up
FPRO_02960	XP_031077373.1	2.2092	5.29913e-07	1.21005e-05	up
FPRO_10528	XP_031081531.1	-2.92445	5.32833e-07	1.2139e-05	down
FPRO_02113	XP_031074361.1	4.01328	5.44419e-07	1.23742e-05	up
FPRO_10307	XP_031081312.1	-1.76796	5.48791e-07	1.24448e-05	down
FPRO_09159	XP_031082450.1	3.44105	5.52397e-07	1.24977e-05	up
FPRO_08352	XP_031087512.1	2.43937	5.69875e-07	1.28634e-05	up
FPRO_10364	XP_031081369.1	-2.96031	5.7588e-07	1.29692e-05	down
FPRO_10698	XP_031081701.1	-1.73251	5.93128e-07	1.33271e-05	down
FPRO_06339	XP_031079063.1	2.15841	5.95563e-07	1.33512e-05	up
FPRO_00237	XP_031076233.1	3.4577	6.06693e-07	1.35697e-05	up
FPRO_10531	XP_031081534.1	2.76019	6.45009e-07	1.4394e-05	up
FPRO_13380	XP_031088246.1	-2.32604	6.46742e-07	1.43999e-05	down
FPRO_13533	XP_031088399.1	-3.63589	6.72527e-07	1.49401e-05	down
FPRO_05058	XP_031080751.1	1.92415	6.87893e-07	1.5247e-05	up
FPRO_03366	XP_031076967.1	3.1178	7.05725e-07	1.5607e-05	up
FPRO_01304	XP_031075169.1	-1.77095	7.09448e-07	1.56541e-05	down
FPRO_03202	XP_031077131.1	1.9171	7.172e-07	1.57897e-05	up
FPRO_14181	XP_031084962.1	-4.0375	7.20405e-07	1.58247e-05	down
FPRO_00091	XP_031076379.1	3.48295	7.25058e-07	1.58914e-05	up
FPRO_10454	XP_031081459.1	2.808	7.43536e-07	1.62601e-05	up
FPRO_03100	XP_031077233.1	2.33876	7.52734e-07	1.64247e-05	up
FPRO_02617	XP_031077716.1	3.67259	7.54786e-07	1.64329e-05	up
FPRO_06721	XP_031078681.1	-3.28966	7.81171e-07	1.69697e-05	down
FPRO_02532	XP_031077801.1	-1.99364	8.3817e-07	1.81678e-05	down
FPRO_18005		-3.2688	8.428e-07	1.82279e-05	down
FPRO_10581	XP_031081584.1	-1.90593	8.5191e-07	1.83632e-05	down
FPRO_07548	XP_031084126.1	-5.39123	8.52796e-07	1.83632e-05	down
FPRO_00592	XP_031075878.1	2.57637	8.6638e-07	1.86077e-05	up
FPRO_01636	XP_031074837.1	2.07389	8.67941e-07	1.86077e-05	up
FPRO_04119	XP_031089083.1	-2.79203	8.80802e-07	1.88028e-05	down
FPRO_04890	XP_031080585.1	-1.68025	8.80875e-07	1.88028e-05	down
FPRO_08673	XP_031087833.1	-1.65208	8.93422e-07	1.90293e-05	down
FPRO_15426	XP_031085933.1	2.6722	8.98272e-07	1.90912e-05	up
FPRO_09741	XP_031083029.1	2.3805	9.09819e-07	1.92948e-05	up
FPRO_11210	XP_031082213.1	3.54793	9.28061e-07	1.96393e-05	up
FPRO_07962	XP_031083713.1	-2.66944	9.47255e-07	2.00024e-05	down
FPRO_12998	XP_031088921.1	2.17821	9.60057e-07	2.02292e-05	up
FPRO_14081	XP_031084862.1	-2.78409	9.87728e-07	2.07677e-05	down
FPRO_00118	XP_031076352.1	-2.64147	9.90015e-07	2.07713e-05	down
FPRO_14520	XP_031085302.1	-3.17491	1.00028e-06	2.0942e-05	down
FPRO_15045	XP_031086313.1	-2.54848	1.04135e-06	2.17554e-05	down
FPRO_13316	XP_031088182.1	3.69054	1.07866e-06	2.24871e-05	up
FPRO_09723	XP_031083011.1	2.28201	1.09515e-06	2.27824e-05	up
FPRO_10727	XP_031081730.1	-1.69564	1.10334e-06	2.29043e-05	down
FPRO_10385	XP_031081390.1	-1.81291	1.11293e-06	2.30546e-05	down
FPRO_10632	XP_031081635.1	2.01588	1.14188e-06	2.36045e-05	up
FPRO_05888	XP_031079513.1	2.35361	1.15256e-06	2.37752e-05	up
FPRO_11550	XP_031086637.1	-3.41548	1.15799e-06	2.3837e-05	down
FPRO_11974	XP_031087059.1	-2.10799	1.18073e-06	2.42544e-05	down
FPRO_05301	XP_031080994.1	-2.43105	1.19442e-06	2.44844e-05	down
FPRO_08332	XP_031087492.1	1.93517	1.22099e-06	2.49768e-05	up
FPRO_10450	XP_031081455.1	-2.10277	1.24289e-06	2.53721e-05	down
FPRO_11690	XP_031086777.1	-1.87156	1.24935e-06	2.5451e-05	down
FPRO_05692	XP_031079709.1	-3.45634	1.27492e-06	2.59182e-05	down
FPRO_09387	XP_031082677.1	2.38133	1.29163e-06	2.61541e-05	up
FPRO_07589	XP_031084085.1	4.21532	1.29185e-06	2.61541e-05	up
FPRO_03642	XP_031076691.1	-3.41014	1.29592e-06	2.61823e-05	down
FPRO_01954	XP_031074519.1	-2.71491	1.30101e-06	2.61877e-05	down
FPRO_15404	XP_031085955.1	-3.78769	1.30152e-06	2.61877e-05	down
FPRO_05296	XP_031080989.1	-2.05463	1.31174e-06	2.63395e-05	down
FPRO_14166	XP_031084947.1	2.85251	1.32358e-06	2.6523e-05	up
FPRO_09306	XP_031082597.1	1.89354	1.37726e-06	2.75424e-05	up
FPRO_08134	XP_031083541.1	1.91277	1.40415e-06	2.8023e-05	up
FPRO_05941	XP_031079461.1	1.93294	1.41817e-06	2.82455e-05	up
FPRO_10113	XP_031083401.1	-4.56425	1.43948e-06	2.86119e-05	down
FPRO_07335	XP_031084339.1	5.22656	1.45293e-06	2.88208e-05	up
FPRO_01513	XP_031074960.1	-2.36554	1.48461e-06	2.93741e-05	down
FPRO_05248	XP_031080941.1	-2.41152	1.4868e-06	2.93741e-05	down
FPRO_13504	XP_031088370.1	-3.21478	1.49829e-06	2.95416e-05	down
FPRO_11016	XP_031082019.1	-2.0535	1.51385e-06	2.97886e-05	down
FPRO_15731	XP_031085628.1	1.94071	1.59161e-06	3.1256e-05	up
FPRO_07922	XP_031083753.1	2.02112	1.62884e-06	3.19234e-05	up
FPRO_11862	XP_031086948.1	-2.12917	1.6415e-06	3.20578e-05	down
FPRO_09673	XP_031082962.1	1.72588	1.64223e-06	3.20578e-05	up
FPRO_09917	XP_031083205.1	2.5527	1.65198e-06	3.21251e-05	up
FPRO_00078	XP_031076392.1	5.45833	1.65222e-06	3.21251e-05	up
FPRO_06638	XP_031078764.1	3.0775	1.68228e-06	3.2645e-05	up
FPRO_15317	XP_031086041.1	4.90609	1.72231e-06	3.33557e-05	up
FPRO_07558	XP_031084116.1	4.56224	1.75868e-06	3.39588e-05	up
FPRO_04827	XP_031080522.1	-2.36038	1.76213e-06	3.39588e-05	down
FPRO_07190	XP_031078212.1	-2.99837	1.76383e-06	3.39588e-05	down
FPRO_02867	XP_031077466.1	3.21957	1.76771e-06	3.39669e-05	up
FPRO_13176	XP_031088043.1	-7.2834	1.79011e-06	3.43303e-05	down
FPRO_14600	XP_031085382.1	-2.61383	1.84733e-06	3.53585e-05	down
FPRO_00963	XP_031075509.1	-2.14442	1.90065e-06	3.63083e-05	down
FPRO_01967	XP_031074506.1	5.32006	1.93306e-06	3.68557e-05	up
FPRO_07476	XP_031084198.1	-3.77456	1.9584e-06	3.72665e-05	down
FPRO_15476	XP_031085883.1	3.03227	1.9629e-06	3.728e-05	up
FPRO_03083	XP_031077250.1	-2.34518	2.09445e-06	3.96395e-05	down
FPRO_13483	XP_031088349.1	-2.2588	2.09521e-06	3.96395e-05	down
FPRO_04530	XP_031080226.1	-2.47011	2.11135e-06	3.98679e-05	down
FPRO_04054	XP_031089148.1	3.56425	2.12573e-06	4.00624e-05	up
FPRO_11833	XP_031086919.1	2.10578	2.18391e-06	4.10802e-05	up
FPRO_08458	XP_031087618.1	2.35547	2.20495e-06	4.13965e-05	up
FPRO_10163	XP_031083451.1	-2.43527	2.26839e-06	4.25063e-05	down
FPRO_10650	XP_031081653.1	1.59	2.2833e-06	4.27042e-05	up
FPRO_15107	XP_031086251.1	2.92587	2.30087e-06	4.29511e-05	up
FPRO_10059	XP_031083347.1	4.48738	2.32958e-06	4.34045e-05	up
FPRO_04229	XP_031079925.1	2.22431	2.44253e-06	4.54227e-05	up
FPRO_01058	XP_031075414.1	-2.01036	2.45387e-06	4.55474e-05	down
FPRO_14961	XP_031086397.1	-3.03133	2.46818e-06	4.57264e-05	down
FPRO_15339	XP_031086019.1	-2.26071	2.52342e-06	4.66619e-05	down
FPRO_06805	XP_031078597.1	2.94882	2.53832e-06	4.68491e-05	up
FPRO_11257	XP_031082259.1	-1.97769	2.54601e-06	4.69029e-05	down
FPRO_00812	XP_031075659.1	3.25432	2.58699e-06	4.75687e-05	up
FPRO_07334	XP_031084340.1	5.32834	2.61779e-06	4.80449e-05	up
FPRO_15453	XP_031085906.1	3.89721	2.67089e-06	4.8928e-05	up
FPRO_11580	XP_031086667.1	-2.81414	2.70421e-06	4.94462e-05	down
FPRO_02531	XP_031077802.1	-2.01269	2.74317e-06	5.00395e-05	down
FPRO_01395	XP_031075078.1	3.18568	2.74685e-06	5.00395e-05	up
FPRO_07497	XP_031084177.1	-2.05226	2.77049e-06	5.03768e-05	down
FPRO_14299	XP_031085080.1	3.9692	2.78761e-06	5.05943e-05	up
FPRO_13737	XP_031084519.1	2.72591	2.80431e-06	5.08036e-05	up
FPRO_08217	XP_031087377.1	-3.2646	2.82439e-06	5.10732e-05	down
FPRO_06338	XP_031079064.1	2.40452	2.92171e-06	5.27358e-05	up
FPRO_00677	XP_031075794.1	-1.73149	2.9617e-06	5.33595e-05	down
FPRO_07569	XP_031084105.1	-2.87742	3.01649e-06	5.42471e-05	down
FPRO_11272	XP_031082274.1	-7.29912	3.03483e-06	5.43856e-05	down
FPRO_12203	XP_031087286.1	-1.99585	3.03575e-06	5.43856e-05	down
FPRO_08495	XP_031087655.1	1.57635	3.04081e-06	5.43856e-05	up
FPRO_05302	XP_031080995.1	-2.18089	3.0749e-06	5.48954e-05	down
FPRO_05994	XP_031079408.1	-1.9742	3.10839e-06	5.53926e-05	down
FPRO_01949	XP_031074524.1	2.66482	3.12283e-06	5.5549e-05	up
FPRO_13636	XP_031088500.1	3.92396	3.21572e-06	5.70979e-05	up
FPRO_10383	XP_031081388.1	-2.44593	3.26044e-06	5.77307e-05	down
FPRO_07657	XP_031084017.1	-2.04377	3.26692e-06	5.77307e-05	down
FPRO_14182	XP_031084963.1	-3.25208	3.26899e-06	5.77307e-05	down
FPRO_07787	XP_031083887.1	1.65637	3.36325e-06	5.92887e-05	up
FPRO_04841	XP_031080536.1	-1.97876	3.41115e-06	6.00252e-05	down
FPRO_04972	XP_031080666.1	3.71041	3.46054e-06	6.07854e-05	up
FPRO_03471	XP_031076862.1	-2.08913	3.53231e-06	6.19353e-05	down
FPRO_10875	XP_031081878.1	2.28472	3.56316e-06	6.23648e-05	up
FPRO_13436	XP_031088302.1	2.86569	3.57246e-06	6.24163e-05	up
FPRO_08857	XP_031089904.1	2.77546	3.61113e-06	6.29799e-05	up
FPRO_12696	XP_031088619.1	4.16519	3.67174e-06	6.39235e-05	up
FPRO_14101	XP_031084882.1	-3.54283	3.68341e-06	6.40131e-05	down
FPRO_01677	XP_031074796.1	2.40929	3.72712e-06	6.46582e-05	up
FPRO_01512	XP_031074961.1	-2.53622	3.75241e-06	6.49823e-05	down
FPRO_08546	XP_031087706.1	2.49948	3.79706e-06	6.56396e-05	up
FPRO_15032	XP_031086326.1	-3.99108	3.84349e-06	6.63255e-05	down
FPRO_10557	XP_031081560.1	3.74769	3.8723e-06	6.67054e-05	up
FPRO_08567	XP_031087727.1	2.32326	4.01163e-06	6.89845e-05	up
FPRO_03676	XP_031076657.1	-2.36435	4.05854e-06	6.96693e-05	down
FPRO_14163	XP_031084944.1	3.13281	4.1486e-06	7.10811e-05	up
FPRO_14274	XP_031085055.1	3.72835	4.15526e-06	7.10811e-05	up
FPRO_15719	XP_031085640.1	3.3694	4.18745e-06	7.14015e-05	up
FPRO_10589	XP_031081592.1	2.02288	4.18854e-06	7.14015e-05	up
FPRO_13035	XP_031088958.1	-2.77629	4.23577e-06	7.20815e-05	down
FPRO_10730	XP_031081733.1	-3.52361	4.28911e-06	7.28629e-05	down
FPRO_15324	XP_031086034.1	3.13486	4.33497e-06	7.35148e-05	up
FPRO_04289	XP_031079985.1	3.38193	4.36418e-06	7.38825e-05	up
FPRO_03324	XP_031077009.1	2.60082	4.42295e-06	7.47486e-05	up
FPRO_12630	XP_031088553.1	5.19697	4.50098e-06	7.58843e-05	up
FPRO_07723	XP_031083951.1	1.92288	4.50561e-06	7.58843e-05	up
FPRO_00196	XP_031076274.1	-1.64424	4.5485e-06	7.64756e-05	down
FPRO_14295	XP_031085076.1	3.59984	4.65304e-06	7.80994e-05	up
FPRO_07189	XP_031078213.1	-2.28551	4.69409e-06	7.8654e-05	down
FPRO_09763	XP_031083051.1	2.22752	4.80238e-06	8.03315e-05	up
FPRO_02877	XP_031077456.1	-1.98507	4.9487e-06	8.25058e-05	down
FPRO_12746	XP_031088669.1	-2.2949	4.94917e-06	8.25058e-05	down
FPRO_06021	XP_031079381.1	1.94994	4.98772e-06	8.30076e-05	up
FPRO_08846	XP_031089915.1	3.20474	5.0096e-06	8.30978e-05	up
FPRO_12205	XP_031087288.1	-2.70633	5.01007e-06	8.30978e-05	down
FPRO_10363	XP_031081368.1	-2.2909	5.0219e-06	8.31535e-05	down
FPRO_01210	XP_031075262.1	1.97829	5.08457e-06	8.40494e-05	up
FPRO_09333	XP_031082623.1	1.91638	5.11063e-06	8.43383e-05	up
FPRO_09174	XP_031082465.1	-1.79141	5.16747e-06	8.51331e-05	down
FPRO_01427	XP_031075046.1	2.56505	5.20814e-06	8.56594e-05	up
FPRO_04189	XP_031089013.1	2.88325	5.35109e-06	8.78634e-05	up
FPRO_07800	XP_031083875.1	2.59943	5.41208e-06	8.87166e-05	up
FPRO_10947	XP_031081950.1	2.36101	5.42835e-06	8.8835e-05	up
FPRO_09620	XP_031082909.1	1.89248	5.45312e-06	8.90919e-05	up
FPRO_02638	XP_031077695.1	1.62439	5.53715e-06	9.03144e-05	up
FPRO_04342	XP_031080038.1	1.74313	5.5757e-06	9.07924e-05	up
FPRO_00345	XP_031076125.1	-1.68404	5.59411e-06	9.08749e-05	down
FPRO_06137	XP_031079265.1	-2.48884	5.59928e-06	9.08749e-05	down
FPRO_13174	XP_031088041.1	-2.43376	5.7754e-06	9.35786e-05	down
FPRO_12034	XP_031087118.1	-2.34734	5.8551e-06	9.47137e-05	down
FPRO_05297	XP_031080990.1	-1.91111	5.87624e-06	9.48993e-05	down
FPRO_12739	XP_031088662.1	-2.5679	5.93468e-06	9.55858e-05	down
FPRO_09645	XP_031082934.1	2.14632	5.93822e-06	9.55858e-05	up
FPRO_06460	XP_031078942.1	-4.2372	5.97629e-06	9.60412e-05	down
FPRO_06342	XP_031079060.1	3.0041	6.08456e-06	9.76214e-05	up
FPRO_14226	XP_031085007.1	-2.03068	6.18656e-06	9.90959e-05	down
FPRO_05848	XP_031079553.1	2.31216	6.20429e-06	9.92181e-05	up
FPRO_12202	XP_031087285.1	2.91681	6.26579e-06	0.000100039	up
FPRO_11687	XP_031086774.1	-1.60433	6.28974e-06	0.000100258	down
FPRO_14456	XP_031085237.1	4.87451	6.44436e-06	0.000102556	up
FPRO_09072	XP_031089690.1	2.20166	6.49137e-06	0.000103137	up
FPRO_13808	XP_031084590.1	-2.1875	6.54027e-06	0.000103746	down
FPRO_11794	XP_031086880.1	-2.39328	6.73374e-06	0.000106643	down
FPRO_07599	XP_031084075.1	-3.52945	6.84302e-06	0.000108199	down
FPRO_11095	XP_031082098.1	-2.68907	6.92456e-06	0.000109312	down
FPRO_15327	XP_031086031.1	2.95297	7.03336e-06	0.000110852	up
FPRO_08248	XP_031087408.1	-2.40804	7.07278e-06	0.000110973	down
FPRO_13203	XP_031088070.1	-3.09893	7.07362e-06	0.000110973	down
FPRO_01899	XP_031074574.1	2.63424	7.07497e-06	0.000110973	up
FPRO_07727	XP_031083947.1	1.96048	7.15427e-06	0.000112038	up
FPRO_04275	XP_031079971.1	3.84609	7.22173e-06	0.000112914	up
FPRO_02539	XP_031077794.1	-2.10462	7.58987e-06	0.000118341	down
FPRO_15513	XP_031085846.1	7.43146	7.59698e-06	0.000118341	up
FPRO_13465	XP_031088331.1	3.50647	7.61268e-06	0.000118341	up
FPRO_02167	XP_031078165.1	-3.1622	7.61702e-06	0.000118341	down
FPRO_11902	XP_031086987.1	-2.34536	7.66923e-06	0.000118964	down
FPRO_07046	XP_031078356.1	4.5897	7.70845e-06	0.000119384	up
FPRO_15123	XP_031086235.1	-2.45612	7.73241e-06	0.000119566	down
FPRO_05715	XP_031079686.1	-2.42564	7.75216e-06	0.000119683	down
FPRO_04981	XP_031080675.1	-1.52778	7.77071e-06	0.000119781	down
FPRO_09740	XP_031083028.1	2.23117	7.80237e-06	0.000120081	up
FPRO_15387	XP_031085972.1	-3.17882	7.85872e-06	0.000120759	down
FPRO_09107	XP_031082398.1	-2.40053	7.99579e-06	0.000122673	down
FPRO_05685	XP_031079716.1	-1.61634	8.02073e-06	0.000122777	down
FPRO_13183	XP_031088050.1	1.9114	8.02759e-06	0.000122777	up
FPRO_11689	XP_031086776.1	-2.10967	8.26086e-06	0.000126107	down
FPRO_13997	XP_031084779.1	5.09098	8.27101e-06	0.000126107	up
FPRO_05597	XP_031079804.1	6.47596	8.31672e-06	0.000126608	up
FPRO_05313	XP_031081006.1	-1.68586	8.50868e-06	0.000129302	down
FPRO_06100	XP_031079302.1	1.99733	8.52005e-06	0.000129302	up
FPRO_03389	XP_031076944.1	2.01232	8.55421e-06	0.00012962	up
FPRO_01381	XP_031075092.1	-2.05084	8.59455e-06	0.000130031	down
FPRO_10429	XP_031081434.1	2.76472	8.65448e-06	0.000130736	up
FPRO_09357	XP_031082647.1	2.04665	8.68294e-06	0.000130964	up
FPRO_06095	XP_031079307.1	-1.89648	8.71065e-06	0.000131181	down
FPRO_05768	XP_031079633.1	1.77	8.74036e-06	0.000131427	up
FPRO_02879	XP_031077454.1	-1.81418	8.75531e-06	0.00013145	down
FPRO_11813	XP_031086899.1	2.73898	9.03657e-06	0.000135466	up
FPRO_14082	XP_031084863.1	-3.13005	9.05297e-06	0.000135478	down
FPRO_00208	XP_031076262.1	2.05715	9.065e-06	0.000135478	up
FPRO_08584	XP_031087744.1	2.94173	9.15307e-06	0.000136587	up
FPRO_07212	XP_031078190.1	-3.40868	9.25047e-06	0.000137831	down
FPRO_01712	XP_031074761.1	1.77775	9.31556e-06	0.00013859	up
FPRO_01740	XP_031074733.1	2.64439	9.37964e-06	0.000139332	up
FPRO_02290	XP_031078043.1	2.87671	9.39839e-06	0.0001394	up
FPRO_05122	XP_031080815.1	1.68811	9.83358e-06	0.000145635	up
FPRO_06253	XP_031079149.1	1.63414	9.8996e-06	0.000146392	up
FPRO_11951	XP_031087036.1	2.73562	9.93616e-06	0.000146711	up
FPRO_14943	XP_031086415.1	3.13382	1.01522e-05	0.000149676	up
FPRO_12156	XP_031087240.1	-2.45708	1.02077e-05	0.000150269	down
FPRO_02524	XP_031077809.1	-1.80503	1.04652e-05	0.000153829	down
FPRO_11014	XP_031082017.1	-2.08187	1.05128e-05	0.000154298	down
FPRO_00706	XP_031075765.1	-1.81737	1.0583e-05	0.000155096	down
FPRO_14248	XP_031085029.1	3.19324	1.06604e-05	0.000155788	up
FPRO_06064	XP_031079338.1	2.1512	1.06619e-05	0.000155788	up
FPRO_08028	XP_031083647.1	-2.45633	1.09226e-05	0.00015936	down
FPRO_07605	XP_031084069.1	2.33661	1.11431e-05	0.000162335	up
FPRO_10963	XP_031081966.1	1.76705	1.11631e-05	0.000162387	up
FPRO_11795	XP_031086881.1	-1.74432	1.12847e-05	0.000163912	down
FPRO_15961	XP_031090102.1	-4.65007	1.13608e-05	0.000164773	down
FPRO_02961	XP_031077372.1	2.36584	1.14331e-05	0.000165578	up
FPRO_01655	XP_031074818.1	-1.94699	1.15172e-05	0.000166551	down
FPRO_03594	XP_031076739.1	2.56094	1.17456e-05	0.000169603	up
FPRO_07932	XP_031083743.1	1.79334	1.18094e-05	0.000170274	up
FPRO_05984	XP_031079418.1	-2.24617	1.18662e-05	0.000170842	down
FPRO_12807	XP_031088730.1	-1.56483	1.19528e-05	0.000171657	down
FPRO_01289	XP_031075184.1	2.52987	1.19578e-05	0.000171657	up
FPRO_11922	XP_031087007.1	3.25737	1.22108e-05	0.000175033	up
FPRO_02981	XP_031077352.1	2.17234	1.2257e-05	0.00017544	up
FPRO_02285	XP_031078048.1	-2.81982	1.24188e-05	0.000177497	down
FPRO_06290	XP_031079112.1	-2.7468	1.2493e-05	0.000178297	down
FPRO_07855	XP_031083820.1	-2.50169	1.26292e-05	0.000179767	down
FPRO_05187	XP_031080880.1	4.57692	1.26326e-05	0.000179767	up
FPRO_15359	XP_031086000.1	2.02626	1.27282e-05	0.000180813	up
rrna53		4.12426	1.27429e-05	0.000180813	up
FPRO_09067	XP_031089695.1	-1.50816	1.30115e-05	0.000184357	down
FPRO_04208	XP_031079905.1	2.54081	1.3418e-05	0.000189843	up
FPRO_09093	XP_031082384.1	-3.50025	1.35971e-05	0.0001921	down
FPRO_01174	XP_031075298.1	2.46992	1.38792e-05	0.000195804	up
FPRO_10587	XP_031081590.1	-2.05313	1.39456e-05	0.000196459	down
FPRO_15689	XP_031085670.1	2.27169	1.4038e-05	0.000197478	up
FPRO_15373	XP_031085986.1	-2.70854	1.40748e-05	0.000197712	down
FPRO_15374	XP_031085985.1	-2.54249	1.40994e-05	0.000197774	down
FPRO_09350	XP_031082640.1	-1.92189	1.44504e-05	0.000202409	down
FPRO_11129	XP_031082132.1	-3.16707	1.47408e-05	0.000206038	down
FPRO_15382	XP_031085977.1	4.33453	1.47515e-05	0.000206038	up
FPRO_14150	XP_031084931.1	5.3056	1.47895e-05	0.000206275	up
FPRO_07600	XP_031084074.1	-3.68112	1.48915e-05	0.000207404	down
FPRO_03784	XP_031076549.1	2.13273	1.49634e-05	0.000208109	up
FPRO_12661	XP_031088584.1	3.78916	1.50051e-05	0.000208395	up
FPRO_13472	XP_031088338.1	1.57434	1.5139e-05	0.000209957	up
FPRO_07828	XP_031083847.1	-1.67282	1.53948e-05	0.000213204	down
FPRO_01411	XP_031075062.1	-1.52243	1.56968e-05	0.00021708	down
FPRO_04772	XP_031080468.1	-1.94339	1.58417e-05	0.000218775	down
FPRO_11509	XP_031086596.1	2.79952	1.59032e-05	0.000219302	up
FPRO_08029	XP_031083646.1	2.36737	1.59245e-05	0.000219302	up
FPRO_02897	XP_031077436.1	-2.33912	1.59603e-05	0.000219487	down
FPRO_08884	XP_031089877.1	2.53962	1.60291e-05	0.000220126	up
FPRO_10561	XP_031081564.1	-4.17881	1.66749e-05	0.000228673	down
FPRO_14422	XP_031085203.1	4.17356	1.66981e-05	0.000228673	up
FPRO_00769	XP_031075702.1	-2.21159	1.70362e-05	0.000232826	down
FPRO_04174	XP_031089028.1	-1.85387	1.70488e-05	0.000232826	down
FPRO_14633	XP_031085415.1	-3.21654	1.70887e-05	0.000233048	down
FPRO_04144	XP_031089058.1	-2.05402	1.71686e-05	0.000233502	down
FPRO_13293	XP_031088160.1	2.23289	1.71696e-05	0.000233502	up
FPRO_10599	XP_031081602.1	-2.09161	1.7302e-05	0.000234977	down
FPRO_15254	XP_031086104.1	2.28109	1.77259e-05	0.000240143	up
FPRO_05975	XP_031079427.1	-1.83361	1.77349e-05	0.000240143	down
FPRO_07269	XP_031084405.1	-2.38087	1.77558e-05	0.000240143	down
FPRO_00374	XP_031076096.1	-1.73474	1.78588e-05	0.000241205	down
FPRO_11055	XP_031082058.1	-2.31225	1.79848e-05	0.000242573	down
FPRO_08617	XP_031087777.1	2.87981	1.83991e-05	0.000247498	up
FPRO_15219	XP_031086139.1	5.03578	1.84004e-05	0.000247498	up
FPRO_14410	XP_031085191.1	-1.76512	1.84527e-05	0.000247861	down
FPRO_14183	XP_031084964.1	-3.0454	1.86712e-05	0.000250454	down
FPRO_09480	XP_031082770.1	-2.1597	1.89002e-05	0.00025318	down
FPRO_13286	XP_031088153.1	-1.95792	1.89811e-05	0.000253918	down
FPRO_12760	XP_031088683.1	-2.34051	1.91513e-05	0.000255846	down
FPRO_15960	XP_031090101.1	-6.91353	1.91784e-05	0.000255859	down
FPRO_01086	XP_031075386.1	-2.49589	1.93893e-05	0.000258323	down
FPRO_08068	XP_031083607.1	2.23375	1.96227e-05	0.000261078	up
FPRO_09278	XP_031082569.1	2.08714	1.96563e-05	0.00026117	up
FPRO_09085	XP_031082376.1	1.87624	1.98999e-05	0.000263704	up
FPRO_09822	XP_031083110.1	1.95422	1.99006e-05	0.000263704	up
FPRO_09912	XP_031083200.1	2.3978	1.99719e-05	0.000264291	up
FPRO_03337	XP_031076996.1	2.25941	2.00609e-05	0.000265112	up
FPRO_00922	XP_031075550.1	-1.59695	2.02772e-05	0.00026761	down
FPRO_14583	XP_031085365.1	2.57633	2.0848e-05	0.000274774	up
FPRO_11163	XP_031082166.1	-1.95322	2.11279e-05	0.00027781	down
FPRO_08109	XP_031083566.1	2.04812	2.11349e-05	0.00027781	up
FPRO_02858	XP_031077475.1	-1.90638	2.12456e-05	0.000278891	down
FPRO_13512	XP_031088378.1	-3.19878	2.15089e-05	0.00028197	down
FPRO_03086	XP_031077247.1	1.90979	2.15804e-05	0.00028253	up
FPRO_09459	XP_031082749.1	1.96938	2.16953e-05	0.000283657	up
FPRO_00051	XP_031076419.1	3.11877	2.18026e-05	0.000284305	up
FPRO_03447	XP_031076886.1	-2.14449	2.18285e-05	0.000284305	down
FPRO_07721	XP_031083953.1	-1.98911	2.18317e-05	0.000284305	down
FPRO_15400	XP_031085959.1	2.43716	2.23896e-05	0.000291101	up
FPRO_00427	XP_031076043.1	-2.20431	2.24472e-05	0.000291101	down
FPRO_05179	XP_031080872.1	1.87518	2.2461e-05	0.000291101	up
FPRO_07710	XP_031083964.1	1.70904	2.24722e-05	0.000291101	up
FPRO_01354	XP_031075119.1	2.35783	2.30238e-05	0.000297584	up
FPRO_04803	XP_031080498.1	1.53349	2.30333e-05	0.000297584	up
FPRO_03677	XP_031076656.1	-1.80731	2.32336e-05	0.000299778	down
FPRO_12331	XP_031089407.1	2.38959	2.37724e-05	0.000306327	up
FPRO_04161	XP_031089041.1	-1.71635	2.40402e-05	0.000309372	down
FPRO_06852	XP_031078550.1	-3.00139	2.49614e-05	0.000320806	down
FPRO_06554	XP_031078848.1	1.72903	2.53822e-05	0.000325448	up
FPRO_00726	XP_031075745.1	2.03744	2.54068e-05	0.000325448	up
FPRO_10925	XP_031081928.1	-1.90856	2.5422e-05	0.000325448	down
FPRO_14544	XP_031085326.1	2.47137	2.57967e-05	0.000329815	up
FPRO_14381	XP_031085162.1	2.47407	2.59106e-05	0.00033084	up
FPRO_01971	XP_031074502.1	3.03897	2.60403e-05	0.000332021	up
FPRO_11605	XP_031086692.1	-2.02099	2.60707e-05	0.000332021	down
FPRO_10845	XP_031081848.1	-1.70164	2.61229e-05	0.000332255	down
FPRO_14055	XP_031084836.1	-7.02507	2.62166e-05	0.000333015	down
FPRO_11046	XP_031082049.1	1.78376	2.62606e-05	0.000333143	up
FPRO_11211	XP_031082214.1	-1.72038	2.64044e-05	0.000334535	down
FPRO_02774	XP_031077559.1	-1.89864	2.64522e-05	0.000334709	down
FPRO_02837	XP_031077496.1	3.12679	2.67514e-05	0.000338048	up
FPRO_02809	XP_031077524.1	-1.8408	2.67849e-05	0.000338048	down
FPRO_13829	XP_031084611.1	-2.32962	2.6917e-05	0.000339278	down
FPRO_14909	XP_031086449.1	2.63838	2.72793e-05	0.000343405	up
FPRO_00819	XP_031075652.1	1.7434	2.74919e-05	0.000345638	up
FPRO_00909	XP_031075563.1	-2.10312	2.76293e-05	0.000346921	down
FPRO_11685	XP_031086772.1	-1.43921	2.79798e-05	0.000350873	down
FPRO_10022	XP_031083310.1	-2.00914	2.83511e-05	0.000355076	down
FPRO_01135	XP_031075337.1	-2.20682	2.86164e-05	0.000357942	down
FPRO_00095	XP_031076375.1	-2.91825	2.87372e-05	0.000358996	down
FPRO_06386	XP_031079016.1	-1.693	2.89587e-05	0.000361303	down
FPRO_15019	XP_031086339.1	3.86411	2.92506e-05	0.000364482	up
FPRO_13996	XP_031084778.1	3.43294	2.93566e-05	0.000365339	up
FPRO_01482	XP_031074991.1	1.58388	2.97532e-05	0.000369806	up
FPRO_02997	XP_031077336.1	2.32761	2.98883e-05	0.000370641	up
FPRO_06496	XP_031078906.1	1.90313	2.98959e-05	0.000370641	up
FPRO_02317	XP_031078016.1	-2.12701	3.02468e-05	0.000374518	down
FPRO_15421	XP_031085938.1	2.40377	3.03896e-05	0.000375813	up
FPRO_13660	XP_031088524.1	2.48498	3.19353e-05	0.000394431	up
FPRO_15871	XP_031090012.1	1.89754	3.22675e-05	0.000398033	up
FPRO_02850	XP_031077483.1	2.73664	3.23102e-05	0.00039806	up
FPRO_07475	XP_031084199.1	-2.79341	3.24934e-05	0.000399815	down
FPRO_14249	XP_031085030.1	2.96011	3.25348e-05	0.000399824	up
FPRO_07251	XP_031084423.1	5.49531	3.27742e-05	0.000402262	up
FPRO_12920	XP_031088843.1	5.84762	3.32757e-05	0.000407908	up
FPRO_14170	XP_031084951.1	-2.71841	3.33849e-05	0.000408736	down
FPRO_01043	XP_031075429.1	-2.20408	3.3917e-05	0.000414734	down
FPRO_12793	XP_031088716.1	2.39496	3.42382e-05	0.000418085	up
FPRO_07833	XP_031083842.1	1.65552	3.42762e-05	0.000418085	up
FPRO_06729	XP_031078673.1	-2.16596	3.45367e-05	0.000420739	down
FPRO_05730	XP_031079671.1	-3.62721	3.51256e-05	0.000427383	down
FPRO_04138	XP_031089064.1	-4.88291	3.53149e-05	0.000429155	down
FPRO_03940	XP_031089262.1	-3.48727	3.53848e-05	0.000429473	down
FPRO_09045	XP_031089717.1	-2.61353	3.55032e-05	0.000429886	down
FPRO_11606	XP_031086693.1	-2.08757	3.55064e-05	0.000429886	down
FPRO_13037	XP_031088960.1	2.05948	3.59579e-05	0.000434816	up
FPRO_02758	XP_031077575.1	-1.94132	3.62612e-05	0.000437944	down
FPRO_06779	XP_031078623.1	1.92665	3.64517e-05	0.000439304	up
FPRO_08361	XP_031087521.1	2.5225	3.64642e-05	0.000439304	up
FPRO_00656	XP_031075815.1	-2.78416	3.6508e-05	0.000439304	down
FPRO_10272	XP_031081276.1	-1.5201	3.66751e-05	0.000440775	down
FPRO_02896	XP_031077437.1	-2.01425	3.68435e-05	0.000442257	down
FPRO_04142	XP_031089060.1	-2.21651	3.69434e-05	0.000442915	down
FPRO_05029	XP_031080723.1	-2.44825	3.70518e-05	0.000443672	down
FPRO_06433	XP_031078969.1	4.89317	3.71134e-05	0.000443868	up
FPRO_12891	XP_031088814.1	1.46705	3.77452e-05	0.000450417	up
FPRO_02940	XP_031077393.1	3.18142	3.77527e-05	0.000450417	up
FPRO_12865	XP_031088788.1	-2.51106	3.78476e-05	0.000451002	down
FPRO_14014	XP_031084796.1	2.95026	3.79171e-05	0.000451277	up
FPRO_03062	XP_031077271.1	-2.05889	3.79626e-05	0.000451277	down
FPRO_15171	XP_031086187.1	1.82754	3.81299e-05	0.000452717	up
FPRO_07694	XP_031083980.1	1.81431	3.96456e-05	0.000470025	up
FPRO_07992	XP_031083683.1	-2.06874	3.96833e-05	0.000470025	down
FPRO_03071	XP_031077262.1	-1.54463	3.99771e-05	0.000472934	down
FPRO_00513	XP_031075957.1	1.56835	4.01767e-05	0.000474723	up
FPRO_13640	XP_031088504.1	-2.24982	4.05569e-05	0.000478639	down
FPRO_09595	XP_031082884.1	-1.55599	4.06564e-05	0.000479238	down
FPRO_14165	XP_031084946.1	2.3085	4.09184e-05	0.000481748	up
FPRO_08960	XP_031089802.1	8.99841	4.09822e-05	0.000481921	up
FPRO_03135	XP_031077198.1	-2.1964	4.10423e-05	0.00048205	down
FPRO_07709	XP_031083965.1	2.89498	4.11448e-05	0.000482677	up
FPRO_03098	XP_031077235.1	2.16091	4.19997e-05	0.000492118	up
FPRO_09891	XP_031083179.1	-2.31121	4.21362e-05	0.000492792	down
FPRO_01807	XP_031074666.1	1.82237	4.2173e-05	0.000492792	up
FPRO_11293	XP_031082295.1	3.82911	4.22425e-05	0.000492792	up
FPRO_05760	XP_031079641.1	2.4546	4.2258e-05	0.000492792	up
FPRO_04924	XP_031080618.1	-1.61609	4.23235e-05	0.00049297	down
FPRO_11970	XP_031087055.1	-4.37315	4.23747e-05	0.000492983	down
FPRO_12508	XP_031089584.1	-4.35559	4.29043e-05	0.000498553	down
FPRO_04116	XP_031089086.1	3.82048	4.30684e-05	0.000499868	up
FPRO_14292	XP_031085073.1	3.95022	4.34037e-05	0.000503165	up
FPRO_13452	XP_031088318.1	2.78165	4.3619e-05	0.000505065	up
FPRO_03415	XP_031076918.1	2.7158	4.39517e-05	0.000508317	up
FPRO_06134	XP_031079268.1	2.1459	4.44669e-05	0.000513671	up
FPRO_06277	XP_031079125.1	-2.38379	4.46825e-05	0.000515555	down
FPRO_00259	XP_031076211.1	-1.61585	4.47827e-05	0.000516104	down
FPRO_11758	XP_031086844.1	3.04451	4.50001e-05	0.000518002	up
FPRO_02390	XP_031077943.1	1.97345	4.50819e-05	0.000518244	up
FPRO_07465	XP_031084209.1	-2.35788	4.51267e-05	0.000518244	down
FPRO_07745	XP_031083929.1	2.20325	4.59317e-05	0.000526873	up
FPRO_07045	XP_031078357.1	2.96736	4.62444e-05	0.000529841	up
FPRO_01166	XP_031075306.1	-1.64216	4.6404e-05	0.000530635	down
FPRO_03260	XP_031077073.1	-2.21604	4.64218e-05	0.000530635	down
FPRO_02526	XP_031077807.1	-1.40366	4.6719e-05	0.000533411	down
FPRO_09516	XP_031082805.1	1.7457	4.70539e-05	0.000536611	up
FPRO_10814	XP_031081817.1	1.65747	4.79485e-05	0.000546179	up
FPRO_15103	XP_031086255.1	-6.56625	4.91064e-05	0.000558721	down
FPRO_12997	XP_031088920.1	1.53203	4.91683e-05	0.000558777	up
FPRO_15726	XP_031085634.1	2.52374	4.93569e-05	0.000560273	up
FPRO_09178	XP_031082469.1	-1.86578	4.98898e-05	0.000565668	down
FPRO_12274	XP_031089350.1	6.17482	4.99999e-05	0.000566262	up
FPRO_10906	XP_031081909.1	1.77038	5.01813e-05	0.000567661	up
FPRO_13426	XP_031088292.1	-1.89305	5.03055e-05	0.000568412	down
FPRO_09440	XP_031082730.1	-2.02111	5.05005e-05	0.000569959	down
FPRO_09083	XP_031082374.1	1.56575	5.07776e-05	0.000572057	up
FPRO_01309	XP_031075164.1	-1.45546	5.08585e-05	0.000572057	down
FPRO_04156	XP_031089046.1	-1.77179	5.08612e-05	0.000572057	down
FPRO_08456	XP_031087616.1	1.72099	5.14943e-05	0.000578515	up
FPRO_03528	XP_031076805.1	2.89208	5.18344e-05	0.000581671	up
FPRO_03504	XP_031076829.1	-2.19172	5.21558e-05	0.000584018	down
FPRO_09489	XP_031082779.1	1.98713	5.21625e-05	0.000584018	up
FPRO_01294	XP_031075179.1	-1.60381	5.26099e-05	0.000588356	down
FPRO_13354	XP_031088220.1	-1.71027	5.31869e-05	0.000594132	down
FPRO_01857	XP_031074616.1	-2.94849	5.32675e-05	0.000594356	down
FPRO_06101	XP_031079301.1	2.0284	5.33802e-05	0.000594937	up
FPRO_01863	XP_031074610.1	-2.56611	5.35249e-05	0.000595874	down
FPRO_10673	XP_031081676.1	-1.78368	5.38111e-05	0.000597867	down
FPRO_05939	XP_031079463.1	1.74652	5.38257e-05	0.000597867	up
FPRO_05208	XP_031080901.1	-1.47716	5.4735e-05	0.00060728	down
rrna47		-2.15761	5.52418e-05	0.000612211	down
FPRO_10813	XP_031081816.1	1.42482	5.65313e-05	0.000625796	up
FPRO_12037	XP_031087121.1	-1.74451	5.71655e-05	0.000632104	down
FPRO_10269	XP_031081273.1	-1.86734	5.75139e-05	0.000635241	down
FPRO_11720	XP_031086807.1	2.47638	5.769e-05	0.00063647	up
FPRO_06156	XP_031079246.1	-1.90957	5.79299e-05	0.000638399	down
FPRO_01417	XP_031075056.1	2.24985	5.91655e-05	0.000651284	up
FPRO_00463	XP_031076007.1	1.63771	5.92382e-05	0.000651354	up
FPRO_06089	XP_031079313.1	-1.68185	6.04309e-05	0.000663726	down
FPRO_09955	XP_031083243.1	-1.51444	6.16944e-05	0.000675617	down
FPRO_09878	XP_031083166.1	1.76215	6.17169e-05	0.000675617	up
FPRO_05525	XP_031079875.1	3.28718	6.172e-05	0.000675617	up
FPRO_03136	XP_031077197.1	-1.34402	6.20916e-05	0.000678928	down
FPRO_10470	XP_031081474.1	1.53036	6.23939e-05	0.000681474	up
FPRO_11114	XP_031082117.1	-1.81751	6.25092e-05	0.000681976	down
FPRO_07520	XP_031084154.1	2.57514	6.26565e-05	0.000682823	up
FPRO_09716	XP_031083004.1	-1.5826	6.41194e-05	0.000697297	down
FPRO_06495	XP_031078907.1	-5.76588	6.41877e-05	0.000697297	down
FPRO_07756	XP_031083918.1	1.79556	6.41977e-05	0.000697297	up
FPRO_02362	XP_031077971.1	1.4752	6.44358e-05	0.000699111	up
FPRO_02166	XP_031078166.1	-2.67394	6.58952e-05	0.000714156	down
FPRO_09539	XP_031082828.1	-1.34212	6.59787e-05	0.000714272	down
FPRO_02812	XP_031077521.1	1.83167	6.60598e-05	0.000714362	up
FPRO_01723	XP_031074750.1	-1.65106	6.6872e-05	0.00072235	down
FPRO_09414	XP_031082704.1	2.44686	6.86492e-05	0.000740732	up
FPRO_11940	XP_031087025.1	1.69239	6.89492e-05	0.000743056	up
FPRO_14157	XP_031084938.1	2.10333	6.90159e-05	0.000743056	up
FPRO_12115	XP_031087199.1	-4.87055	6.97612e-05	0.000750258	down
FPRO_07048	XP_031078354.1	5.076	6.99766e-05	0.000751751	up
FPRO_10981	XP_031081984.1	2.11305	7.02745e-05	0.000754126	up
FPRO_06482	XP_031078920.1	2.48668	7.03998e-05	0.000754646	up
FPRO_06015	XP_031079387.1	2.9327	7.05197e-05	0.000755107	up
FPRO_13048	XP_031088971.1	-1.78979	7.08191e-05	0.000757487	down
FPRO_01405	XP_031075068.1	4.4062	7.0921e-05	0.000757751	up
FPRO_12040	XP_031087124.1	-1.94819	7.11451e-05	0.000759319	down
FPRO_10042	XP_031083330.1	6.25477	7.1771e-05	0.000764903	up
FPRO_03104	XP_031077229.1	1.51683	7.18241e-05	0.000764903	up
FPRO_02447	XP_031077886.1	1.99876	7.24459e-05	0.00077069	up
FPRO_06590	XP_031078812.1	-1.91666	7.29474e-05	0.000775185	down
FPRO_12002	XP_031087087.1	2.36713	7.32733e-05	0.000777326	up
FPRO_04267	XP_031079963.1	2.18633	7.33073e-05	0.000777326	up
FPRO_07481	XP_031084193.1	2.39853	7.44864e-05	0.000788977	up
FPRO_07902	XP_031083773.1	1.93989	7.50411e-05	0.000793996	up
FPRO_09904	XP_031083192.1	5.54384	7.54974e-05	0.000797964	up
FPRO_10588	XP_031081591.1	1.92095	7.65343e-05	0.000808054	up
FPRO_06472	XP_031078930.1	3.97415	7.67379e-05	0.000808489	up
FPRO_02705	XP_031077628.1	1.6992	7.67402e-05	0.000808489	up
FPRO_15191	XP_031086167.1	-3.32361	7.76222e-05	0.000816905	down
FPRO_07912	XP_031083763.1	-2.90017	7.78768e-05	0.000818707	down
FPRO_10554	XP_031081557.1	-2.7127	7.80347e-05	0.000819489	down
FPRO_08264	XP_031087424.1	-3.3828	7.84028e-05	0.000822476	down
FPRO_15278	XP_031086080.1	3.75746	7.90331e-05	0.000828203	up
FPRO_03628	XP_031076705.1	-2.04701	7.97232e-05	0.000834544	down
FPRO_02916	XP_031077417.1	-2.10332	8.01767e-05	0.000838397	down
FPRO_14601	XP_031085383.1	-2.35748	8.08729e-05	0.000844778	down
FPRO_02508	XP_031077825.1	-1.9115	8.13109e-05	0.000848451	down
FPRO_10714	XP_031081717.1	-1.64478	8.14943e-05	0.000849462	down
FPRO_08401	XP_031087561.1	-1.64163	8.19111e-05	0.0008529	down
FPRO_15026	XP_031086332.1	2.90962	8.28407e-05	0.000861666	up
FPRO_05186	XP_031080879.1	1.89536	8.29532e-05	0.000861923	up
FPRO_00315	XP_031076155.1	2.53451	8.35031e-05	0.000866719	up
FPRO_03893	XP_031089309.1	2.45294	8.36547e-05	0.000867377	up
FPRO_03057	XP_031077276.1	-1.84955	8.4704e-05	0.00087733	down
FPRO_10745	XP_031081748.1	1.4003	8.50414e-05	0.000879328	up
FPRO_09562	XP_031082851.1	-1.55017	8.50761e-05	0.000879328	down
FPRO_06318	XP_031079084.1	1.87551	8.59182e-05	0.000887098	up
FPRO_00411	XP_031076059.1	-1.95586	8.67059e-05	0.000894291	down
FPRO_15410	XP_031085949.1	-3.3587	8.68598e-05	0.000894938	down
FPRO_04808	XP_031080503.1	-1.55684	8.69582e-05	0.000895013	down
FPRO_07889	XP_031083786.1	-2.27123	8.71916e-05	0.000896476	down
FPRO_04799	XP_031080494.1	-2.04656	8.74576e-05	0.00089827	down
FPRO_10386	XP_031081391.1	-1.56506	8.87713e-05	0.000910811	down
FPRO_06583	XP_031078819.1	-1.78486	8.92242e-05	0.000914502	down
FPRO_01140	XP_031075332.1	1.92478	9.06786e-05	0.00092844	up
FPRO_06967	XP_031078435.1	-2.01313	9.08209e-05	0.000928928	down
FPRO_12757	XP_031088680.1	-1.40398	9.11028e-05	0.000930842	down
FPRO_15038	XP_031086320.1	-2.16452	9.17988e-05	0.000936977	down
FPRO_13081	XP_031089004.1	-1.71246	9.23988e-05	0.000942122	down
FPRO_15555	XP_031085804.1	3.52394	9.25024e-05	0.0009422	up
FPRO_03741	XP_031076592.1	2.28784	9.28792e-05	0.000945058	up
FPRO_06455	XP_031078947.1	3.12253	9.30395e-05	0.000945709	up
FPRO_09931	XP_031083219.1	-2.13803	9.40623e-05	0.000954601	down
FPRO_13135	XP_031088002.1	-1.85827	9.41088e-05	0.000954601	down
FPRO_06203	XP_031079199.1	1.41213	9.4351e-05	0.000956071	up
FPRO_06020	XP_031079382.1	-1.75331	9.4581e-05	0.000957349	down
FPRO_13803	XP_031084585.1	3.79859	9.46722e-05	0.000957349	up
FPRO_01687	XP_031074786.1	1.88994	9.48812e-05	0.000957654	up
FPRO_00750	XP_031075721.1	1.80845	9.48974e-05	0.000957654	up
FPRO_08946	XP_031089816.1	-2.80585	9.55482e-05	0.000963231	down
FPRO_02838	XP_031077495.1	3.24638	9.6951e-05	0.000975177	up
FPRO_07547	XP_031084127.1	-4.57838	9.70014e-05	0.000975177	down
FPRO_03354	XP_031076979.1	-3.6823	9.7031e-05	0.000975177	down
FPRO_01432	XP_031075041.1	-1.99406	9.72711e-05	0.00097659	down
FPRO_12967	XP_031088890.1	-1.67196	9.79273e-05	0.000982174	down
FPRO_14994	XP_031086364.1	-2.11457	9.80742e-05	0.000982644	down
FPRO_05817	XP_031079584.1	-3.01127	9.8281e-05	0.000983391	down
FPRO_08393	XP_031087553.1	1.47303	9.83491e-05	0.000983391	up
FPRO_14367	XP_031085148.1	2.64926	9.93725e-05	0.000992613	up
FPRO_08453	XP_031087613.1	2.3961	9.9622e-05	0.000994094	up
FPRO_01337	XP_031075136.1	-1.78417	0.000100131	0.000998158	down
FPRO_01558	XP_031074915.1	-1.47929	0.000101543	0.00101121	down
FPRO_05234	XP_031080927.1	2.97474	0.000101727	0.00101202	up
FPRO_00380	XP_031076090.1	-2.76746	0.000101957	0.00101328	down
FPRO_09381	XP_031082671.1	1.97478	0.000102795	0.00102057	up
FPRO_04702	XP_031080398.1	-1.83201	0.000103281	0.00102436	down
FPRO_09080	XP_031089682.1	-1.91887	0.000103928	0.00102974	down
FPRO_00334	XP_031076136.1	-2.38839	0.000104236	0.00103175	down
FPRO_06490	XP_031078912.1	-2.01456	0.000104919	0.00103746	down
FPRO_13200	XP_031088067.1	1.90839	0.00010567	0.00104384	up
FPRO_04120	XP_031089082.1	-2.20046	0.000106377	0.00104883	down
FPRO_08291	XP_031087451.1	1.68793	0.000106389	0.00104883	up
FPRO_01854	XP_031074619.1	-2.74442	0.000106576	0.00104962	down
FPRO_00611	XP_031075859.1	1.58054	0.000108985	0.00107227	up
FPRO_08982	XP_031089780.1	2.69263	0.000109307	0.00107436	up
FPRO_09015	XP_031089747.1	-1.68044	0.000109979	0.00107989	down
FPRO_00809	XP_031075662.1	3.77273	0.000111255	0.00109132	up
FPRO_05863	XP_031079538.1	2.12436	0.000111923	0.00109678	up
FPRO_09210	XP_031082501.1	1.74484	0.000112194	0.00109834	up
FPRO_10017	XP_031083305.1	2.98745	0.000112984	0.00110494	up
FPRO_11015	XP_031082018.1	-1.58084	0.000113094	0.00110494	down
FPRO_02503	XP_031077830.1	2.47082	0.000113705	0.00110981	up
FPRO_10552	XP_031081555.1	-2.2056	0.000114383	0.00111532	down
FPRO_01614	XP_031074859.1	-1.83261	0.000114806	0.00111833	down
FPRO_09542	XP_031082831.1	1.55033	0.000115447	0.00112346	up
FPRO_14315	XP_031085096.1	-3.53538	0.000115994	0.00112679	down
FPRO_11633	XP_031086720.1	3.23453	0.000116018	0.00112679	up
FPRO_04604	XP_031080300.1	1.76233	0.00011659	0.00113122	up
FPRO_02251	XP_031078081.1	-1.49515	0.000116861	0.00113273	down
FPRO_13745	XP_031084527.1	-3.28309	0.000117243	0.00113532	down
FPRO_02529	XP_031077804.1	1.95709	0.000118323	0.00114464	up
FPRO_06129	XP_031079273.1	1.40546	0.000118737	0.00114752	up
FPRO_06412	XP_031078990.1	2.92896	0.000118907	0.00114803	up
FPRO_02404	XP_031077929.1	2.66741	0.000119036	0.00114814	up
FPRO_09312	XP_031082603.1	1.88468	0.00012028	0.00115901	up
FPRO_11363	XP_031082365.1	-2.60588	0.000121573	0.00117032	down
FPRO_04785	XP_031080480.1	1.25397	0.000123911	0.00119165	up
FPRO_10529	XP_031081532.1	1.88369	0.000125765	0.0012083	up
FPRO_00388	XP_031076082.1	1.80544	0.000127579	0.00122454	up
FPRO_13134	XP_031088001.1	-2.27212	0.000127833	0.00122578	down
FPRO_10610	XP_031081613.1	-1.76013	0.000129304	0.00123867	down
FPRO_09600	XP_031082889.1	2.10165	0.000129851	0.0012427	up
FPRO_06030	XP_031079372.1	2.93854	0.000130118	0.00124404	up
FPRO_02719	XP_031077614.1	1.6514	0.000130267	0.00124426	up
FPRO_10585	XP_031081588.1	1.43308	0.000131611	0.00125587	up
FPRO_10393	XP_031081398.1	-3.05376	0.000132483	0.00126296	down
FPRO_00813	XP_031075658.1	2.10915	0.00013308	0.00126742	up
FPRO_12654	XP_031088577.1	-2.4752	0.000133232	0.00126764	down
FPRO_10991	XP_031081994.1	-1.39567	0.000134235	0.00127595	down
FPRO_08223	XP_031087383.1	-2.16296	0.0001366	0.00129717	down
FPRO_11863	XP_031086949.1	1.57176	0.000138491	0.00131386	up
FPRO_08826	XP_031089935.1	5.58294	0.000139412	0.00132132	up
FPRO_14193	XP_031084974.1	2.63961	0.000140261	0.00132808	up
FPRO_14298	XP_031085079.1	2.57183	0.000140583	0.00132985	up
FPRO_09930	XP_031083218.1	-1.94727	0.000141089	0.00133335	down
FPRO_08427	XP_031087587.1	-1.78373	0.000141509	0.00133603	down
FPRO_06666	XP_031078736.1	4.06856	0.000141644	0.00133603	up
FPRO_10708	XP_031081711.1	2.36623	0.000143143	0.00134827	up
FPRO_05602	XP_031079799.1	-3.62321	0.000143217	0.00134827	down
FPRO_00693	XP_031075778.1	-1.38625	0.000143507	0.00134971	down
FPRO_01108	XP_031075364.1	-1.35289	0.000144479	0.00135755	down
FPRO_09745	XP_031083033.1	2.12114	0.000144789	0.00135916	up
FPRO_01806	XP_031074667.1	-1.32533	0.000146376	0.00137275	down
FPRO_02310	XP_031078023.1	-2.22555	0.000146743	0.00137488	down
FPRO_01941	XP_031074532.1	2.29356	0.000147933	0.00138386	up
FPRO_02972	XP_031077361.1	2.31251	0.0001481	0.00138386	up
FPRO_09895	XP_031083183.1	2.86486	0.000148125	0.00138386	up
FPRO_01282	XP_031075191.1	2.15058	0.000150199	0.00140191	up
FPRO_07707	XP_031083967.1	1.45948	0.000150761	0.00140581	up
FPRO_11705	XP_031086792.1	2.63992	0.000152021	0.00141621	up
FPRO_07641	XP_031084033.1	-2.10991	0.000152691	0.00142111	down
FPRO_15239	XP_031086119.1	2.34037	0.000153765	0.00142941	up
FPRO_05825	XP_031079576.1	2.08765	0.000153874	0.00142941	up
FPRO_08344	XP_031087504.1	2.44307	0.000154751	0.0014362	up
FPRO_09065	XP_031089697.1	1.67318	0.000155413	0.00144098	up
FPRO_04130	XP_031089072.1	-1.82575	0.000155743	0.00144268	down
FPRO_06375	XP_031079027.1	2.01185	0.000156004	0.00144373	up
FPRO_00701	XP_031075770.1	1.62309	0.000158066	0.00146018	up
FPRO_00358	XP_031076112.1	-1.46277	0.000158079	0.00146018	down
FPRO_07982	XP_031083693.1	1.57286	0.000158515	0.00146284	up
FPRO_02456	XP_031077877.1	1.33143	0.00016224	0.0014958	up
FPRO_01281	XP_031075192.1	3.42029	0.000162807	0.00149963	up
FPRO_18155		1.96342	0.000163057	0.00150053	up
FPRO_09202	XP_031082493.1	-2.40501	0.000163779	0.00150576	down
FPRO_01662	XP_031074811.1	-1.49979	0.000164704	0.00151227	down
FPRO_01738	XP_031074735.1	1.43989	0.000164795	0.00151227	up
FPRO_06283	XP_031079119.1	1.57485	0.000165518	0.00151748	up
FPRO_07030	XP_031078372.1	3.15291	0.000165679	0.00151754	up
FPRO_12272	XP_031089348.1	-2.01458	0.000168384	0.00154088	down
FPRO_02276	XP_031078057.1	-1.61553	0.000169498	0.00154963	down
FPRO_02878	XP_031077455.1	-1.67887	0.0001703	0.00155552	down
FPRO_01529	XP_031074944.1	-1.91561	0.000171	0.00156046	down
FPRO_14032	XP_031084814.1	2.32588	0.000171689	0.00156529	up
FPRO_07751	XP_031083923.1	2.14649	0.000173302	0.00157853	up
FPRO_01942	XP_031074531.1	2.39262	0.000173929	0.00158277	up
FPRO_12785	XP_031088708.1	2.01846	0.000174189	0.00158367	up
FPRO_06268	XP_031079134.1	1.43203	0.000175278	0.0015921	up
FPRO_03706	XP_031076627.1	-2.06717	0.000177149	0.00160761	down
FPRO_08995	XP_031089767.1	2.3545	0.000178656	0.00161978	up
FPRO_02840	XP_031077493.1	1.82938	0.000179663	0.00162741	up
FPRO_05717	XP_031079684.1	-1.41161	0.000182404	0.00165072	down
FPRO_13638	XP_031088502.1	-2.87903	0.000184001	0.00166339	down
FPRO_06382	XP_031079020.1	1.20472	0.000184264	0.00166339	up
FPRO_12619	XP_031088542.1	-2.93407	0.000184313	0.00166339	down
FPRO_10146	XP_031083434.1	-3.07949	0.000185234	0.00166989	down
FPRO_14250	XP_031085031.1	2.53542	0.000185407	0.00166989	up
FPRO_06309	XP_031079093.1	-1.37428	0.000185543	0.00166989	down
FPRO_05862	XP_031079539.1	2.14604	0.000186853	0.00168014	up
FPRO_00999	XP_031075473.1	1.82114	0.000187191	0.00168163	up
FPRO_10641	XP_031081644.1	-1.63189	0.000188139	0.00168845	down
FPRO_08921	XP_031089840.1	-2.49537	0.000188294	0.00168845	down
FPRO_00486	XP_031075984.1	-1.52954	0.000189058	0.00169376	down
FPRO_04411	XP_031080107.1	1.89423	0.000189636	0.00169675	up
FPRO_13141	XP_031088008.1	-2.26161	0.000189737	0.00169675	down
FPRO_04749	XP_031080445.1	-3.72286	0.000190152	0.00169891	down
FPRO_11797	XP_031086883.1	-1.49837	0.000190661	0.00170191	down
FPRO_03195	XP_031077138.1	1.50302	0.000191064	0.00170396	up
FPRO_09731	XP_031083019.1	-1.83676	0.000191894	0.00170981	down
FPRO_04786	XP_031080481.1	2.06858	0.000192918	0.00171738	up
FPRO_05088	XP_031080781.1	2.1376	0.000193815	0.0017238	up
FPRO_15557	XP_031085802.1	3.03198	0.000194064	0.00172445	up
FPRO_11825	XP_031086911.1	-1.9994	0.000194789	0.00172933	down
FPRO_13191	XP_031088058.1	1.86681	0.000195502	0.00173408	up
FPRO_08508	XP_031087668.1	1.56101	0.000196512	0.00174147	up
FPRO_00778	XP_031075693.1	-1.80093	0.000197415	0.00174789	down
FPRO_05028	XP_031080722.1	-1.79309	0.000200119	0.00176974	down
FPRO_06027	XP_031079375.1	2.48232	0.000200391	0.00176974	up
FPRO_06470	XP_031078932.1	1.67712	0.000200423	0.00176974	up
FPRO_00962	XP_031075510.1	2.01601	0.000201295	0.00177585	up
FPRO_04439	XP_031080135.1	-1.32885	0.000203749	0.00179588	down
FPRO_06133	XP_031079269.1	-1.48283	0.000204243	0.00179808	down
FPRO_05980	XP_031079422.1	-2.11504	0.000204365	0.00179808	down
FPRO_12155	XP_031087239.1	-3.32558	0.00020519	0.00180373	down
FPRO_05310	XP_031081003.1	1.71877	0.000206161	0.00181064	up
FPRO_00730	XP_031075741.1	1.29011	0.000207273	0.00181642	up
FPRO_02735	XP_031077598.1	-1.28461	0.000207289	0.00181642	down
FPRO_11032	XP_031082035.1	-2.2125	0.000207422	0.00181642	down
FPRO_09900	XP_031083188.1	-2.35534	0.000207559	0.00181642	down
FPRO_04259	XP_031079955.1	1.68441	0.000207866	0.00181749	up
FPRO_15345	XP_031086014.1	-2.27374	0.000208464	0.00182109	down
FPRO_04343	XP_031080039.1	1.70353	0.000210696	0.00183895	up
FPRO_00771	XP_031075700.1	-1.65343	0.000214529	0.00187075	down
FPRO_08416	XP_031087576.1	2.43589	0.000214922	0.00187251	up
FPRO_04752	XP_031080448.1	2.12695	0.000215287	0.00187403	up
FPRO_05314	XP_031081007.1	-2.14696	0.000216898	0.00188601	down
FPRO_02541	XP_031077792.1	2.13299	0.000217047	0.00188601	up
FPRO_04355	XP_031080051.1	1.73111	0.000217322	0.00188673	up
FPRO_15322	XP_031086036.1	2.14172	0.000218242	0.00189304	up
FPRO_08424	XP_031087584.1	-1.65463	0.000219412	0.00190151	down
FPRO_10565	XP_031081568.1	-2.02595	0.00021983	0.00190345	down
FPRO_05074	XP_031080767.1	1.67918	0.000220436	0.00190701	up
FPRO_13332	XP_031088198.1	1.78059	0.00022193	0.00191676	up
FPRO_12678	XP_031088601.1	4.67596	0.000221953	0.00191676	up
FPRO_04846	XP_031080541.1	2.0775	0.000223315	0.00192683	up
FPRO_02697	XP_031077636.1	-1.36437	0.000223606	0.00192764	down
FPRO_08544	XP_031087704.1	2.62506	0.000225703	0.00194401	up
FPRO_06892	XP_031078510.1	-2.77892	0.000226869	0.00195235	down
FPRO_08256	XP_031087416.1	1.68209	0.000228427	0.00196404	up
FPRO_03632	XP_031076701.1	-1.63521	0.000230485	0.00197999	down
FPRO_07504	XP_031084170.1	-1.4274	0.000231303	0.00198529	down
FPRO_07667	XP_031084007.1	1.88726	0.00023267	0.00199464	up
FPRO_13241	XP_031088108.1	-2.3258	0.0002328	0.00199464	down
FPRO_06280	XP_031079122.1	2.2557	0.000233069	0.0019952	up
FPRO_08239	XP_031087399.1	-1.59648	0.00023387	0.00199909	down
FPRO_00071	XP_031076399.1	-1.54638	0.00023393	0.00199909	down
FPRO_00674	XP_031075797.1	-2.32066	0.000234376	0.00200046	down
FPRO_14485	XP_031085266.1	-4.85332	0.000234497	0.00200046	down
FPRO_01429	XP_031075044.1	1.92047	0.000236116	0.00201252	up
FPRO_02682	XP_031077651.1	2.62901	0.000237564	0.0020231	up
FPRO_08305	XP_031087465.1	2.49221	0.000238796	0.00203184	up
FPRO_10568	XP_031081571.1	-2.59934	0.00023933	0.00203461	down
FPRO_13283	XP_031088150.1	1.45149	0.000241755	0.00205345	up
FPRO_06475	XP_031078927.1	1.69832	0.000243256	0.00206442	up
FPRO_08436	XP_031087596.1	3.49476	0.000248179	0.00210438	up
FPRO_13190	XP_031088057.1	1.7955	0.000249096	0.00211033	up
FPRO_01423	XP_031075050.1	2.49635	0.000250291	0.00211863	up
FPRO_09499	XP_031082788.1	1.32072	0.000253272	0.00214202	up
FPRO_01240	XP_031075233.1	-1.82385	0.000253583	0.0021428	down
FPRO_09450	XP_031082740.1	1.49238	0.000253855	0.00214326	up
FPRO_10635	XP_031081638.1	3.05515	0.000254169	0.00214406	up
FPRO_16165	XP_031081282.1	1.49853	0.000256248	0.00215974	up
FPRO_03103	XP_031077230.1	1.39141	0.000256588	0.00216075	up
FPRO_04334	XP_031080030.1	2.68862	0.00025917	0.00218063	up
FPRO_11070	XP_031082073.1	1.84076	0.000259515	0.00218153	up
FPRO_01256	XP_031075217.1	1.45862	0.000259722	0.00218153	up
FPRO_06394	XP_031079008.1	1.3696	0.0002606	0.00218703	up
FPRO_09651	XP_031082940.1	2.30948	0.000261575	0.00219334	up
FPRO_06066	XP_031079336.1	-1.93242	0.00026291	0.00220148	down
FPRO_04819	XP_031080514.1	1.60914	0.000262994	0.00220148	up
FPRO_11677	XP_031086764.1	1.50194	0.00026359	0.00220459	up
FPRO_12265	XP_031089341.1	2.17188	0.000264931	0.00221392	up
FPRO_13498	XP_031088364.1	-2.92385	0.00026548	0.00221662	down
FPRO_06851	XP_031078551.1	-4.63267	0.000267476	0.00223139	down
FPRO_06848	XP_031078554.1	-4.08941	0.000270242	0.00225015	down
FPRO_11741	XP_031086827.1	1.77388	0.000270338	0.00225015	up
FPRO_13984	XP_031084766.1	-3.40733	0.000270412	0.00225015	down
FPRO_04175	XP_031089027.1	-1.95308	0.000271857	0.00226026	down
FPRO_00160	XP_031076310.1	-1.57129	0.000278713	0.0023153	down
FPRO_10574	XP_031081577.1	-1.38901	0.00028049	0.00232809	down
FPRO_03067	XP_031077266.1	-1.42589	0.000282177	0.00234012	down
FPRO_07839	XP_031083836.1	2.30547	0.000284302	0.00235575	up
FPRO_05336	XP_031081029.1	-2.36802	0.000285816	0.0023663	down
FPRO_08085	XP_031083590.1	-1.42674	0.000289381	0.00239379	down
FPRO_07870	XP_031083805.1	-1.29529	0.00029017	0.0023983	down
FPRO_08824	XP_031089937.1	2.82967	0.000292925	0.00241904	up
FPRO_10463	XP_031081468.1	-1.46956	0.000293748	0.00242379	down
FPRO_11716	XP_031086803.1	1.54376	0.000294699	0.0024296	up
FPRO_03787	XP_031076546.1	4.63752	0.000296468	0.00244213	up
FPRO_10473	XP_031081477.1	1.71484	0.000296907	0.00244369	up
FPRO_11164	XP_031082167.1	-1.70872	0.000297672	0.00244622	down
FPRO_07968	XP_031083707.1	1.5973	0.000297765	0.00244622	up
FPRO_10041	XP_031083329.1	3.92759	0.000297961	0.00244622	up
FPRO_06970	XP_031078432.1	3.80499	0.000300522	0.00246519	up
FPRO_11763	XP_031086849.1	1.58475	0.000301647	0.00247235	up
FPRO_02559	XP_031077774.1	1.73425	0.000305133	0.00249883	up
FPRO_05855	XP_031079546.1	1.45017	0.000307026	0.00251224	up
FPRO_02917	XP_031077416.1	-1.64935	0.000307829	0.00251607	down
FPRO_05060	XP_031080753.1	1.73922	0.000308119	0.00251607	up
FPRO_14598	XP_031085380.1	-1.91993	0.000308491	0.00251607	down
FPRO_01682	XP_031074791.1	2.16288	0.00030852	0.00251607	up
FPRO_04335	XP_031080031.1	-1.4302	0.000311021	0.00253128	down
FPRO_00445	XP_031076025.1	-1.38203	0.000311064	0.00253128	down
FPRO_01444	XP_031075029.1	1.72599	0.000311157	0.00253128	up
FPRO_12741	XP_031088664.1	-2.26881	0.000311812	0.0025345	down
FPRO_12808	XP_031088731.1	-1.35668	0.00031309	0.00254279	down
FPRO_14036	XP_031084817.1	3.34458	0.000315724	0.00256206	up
FPRO_10509	XP_031081513.1	1.86539	0.000318503	0.00258074	up
FPRO_02318	XP_031078015.1	-1.62189	0.000318552	0.00258074	down
FPRO_10549	XP_031081552.1	-1.80565	0.000320183	0.00259182	down
FPRO_11799	XP_031086885.1	-1.54094	0.000323734	0.0026184	down
FPRO_09557	XP_031082846.1	-1.65044	0.000324653	0.00262368	down
FPRO_11949	XP_031087034.1	1.73113	0.000326418	0.00263577	up
FPRO_06430	XP_031078972.1	1.92927	0.000330314	0.0026646	up
FPRO_14514	XP_031085296.1	-2.65096	0.000330778	0.0026646	down
FPRO_12725	XP_031088648.1	2.63717	0.000330803	0.0026646	up
FPRO_05119	XP_031080812.1	1.96563	0.000333473	0.00268391	up
FPRO_09544	XP_031082833.1	-2.88061	0.000334777	0.0026922	down
FPRO_10457	XP_031081462.1	3.61625	0.00033563	0.00269685	up
FPRO_09173	XP_031082464.1	1.45417	0.000335993	0.00269756	up
FPRO_15000	XP_031086358.1	2.24022	0.000337253	0.00270391	up
FPRO_07487	XP_031084187.1	-1.46253	0.000337334	0.00270391	down
FPRO_05808	XP_031079593.1	-1.40517	0.000338391	0.00271016	down
FPRO_04373	XP_031080069.1	-1.71605	0.000340406	0.00272408	down
FPRO_01172	XP_031075300.1	2.4995	0.000341631	0.00273116	up
FPRO_06202	XP_031079200.1	1.76393	0.000341848	0.00273116	up
FPRO_04198	XP_031079895.1	1.99274	0.000344323	0.0027487	up
FPRO_12618	XP_031088541.1	-2.45257	0.000344827	0.00274968	down
FPRO_07961	XP_031083714.1	-1.37469	0.000345006	0.00274968	down
FPRO_02530	XP_031077803.1	-1.27969	0.000346525	0.002758	down
FPRO_00732	XP_031075739.1	1.86214	0.000346611	0.002758	up
FPRO_14065	XP_031084846.1	-2.3597	0.000347694	0.00276438	down
FPRO_08270	XP_031087430.1	-1.48889	0.000350114	0.00278137	down
FPRO_14612	XP_031085394.1	1.5252	0.000350826	0.00278477	up
FPRO_10254	XP_031081257.1	-3.5489	0.00035189	0.00279096	down
FPRO_05600	XP_031079801.1	-2.8884	0.000354395	0.00280856	down
FPRO_09111	XP_031082402.1	1.90996	0.000360416	0.00285397	up
FPRO_15183	XP_031086175.1	2.17146	0.000363742	0.00287783	up
FPRO_01751	XP_031074722.1	1.54448	0.000364016	0.00287783	up
FPRO_08307	XP_031087467.1	1.82108	0.000365538	0.00288755	up
FPRO_09711	XP_031082999.1	1.41084	0.000370324	0.00292285	up
FPRO_04807	XP_031080502.1	-2.38268	0.000370603	0.00292285	down
FPRO_02305	XP_031078028.1	-1.38563	0.00037259	0.00293616	down
FPRO_05271	XP_031080964.1	-2.49864	0.000373795	0.0029433	down
FPRO_09068	XP_031089694.1	-1.73147	0.000376166	0.0029596	down
FPRO_03208	XP_031077125.1	2.25667	0.000377584	0.00296837	up
FPRO_04303	XP_031079999.1	-2.18178	0.000381125	0.00298825	down
FPRO_15623	XP_031085736.1	2.95806	0.00038117	0.00298825	up
FPRO_14040	XP_031084821.1	2.32759	0.000381264	0.00298825	up
FPRO_07674	XP_031084000.1	-1.74993	0.00038133	0.00298825	down
FPRO_07644	XP_031084030.1	1.27226	0.000382956	0.0029986	up
FPRO_09347	XP_031082637.1	1.48079	0.00038369	0.00300196	up
FPRO_01200	XP_031075272.1	2.0717	0.000384	0.00300199	up
FPRO_03667	XP_031076666.1	1.60262	0.00038726	0.00302312	up
FPRO_15199	XP_031086159.1	-1.75268	0.000387319	0.00302312	down
FPRO_01777	XP_031074696.1	2.65916	0.00038968	0.00303913	up
FPRO_14280	XP_031085061.1	-4.01906	0.000392014	0.00305315	down
FPRO_08027	XP_031083648.1	-1.85073	0.000392364	0.00305315	down
FPRO_08118	XP_031083557.1	-1.45439	0.00039241	0.00305315	down
FPRO_08347	XP_031087507.1	-2.5165	0.000393478	0.00305903	down
FPRO_06580	XP_031078822.1	2.8921	0.00039438	0.00306362	up
FPRO_02928	XP_031077405.1	1.35642	0.000394927	0.00306544	up
FPRO_00645	XP_031075826.1	2.33495	0.000398662	0.00309199	up
FPRO_09611	XP_031082900.1	1.29695	0.000399393	0.00309522	up
FPRO_11260	XP_031082262.1	1.78859	0.000401547	0.00310946	up
FPRO_00317	XP_031076153.1	-2.35313	0.000404628	0.00313085	down
FPRO_07677	XP_031083997.1	-1.26836	0.000407403	0.00314983	down
FPRO_02750	XP_031077583.1	2.11431	0.000407954	0.00315161	up
FPRO_04801	XP_031080496.1	1.87297	0.000408712	0.00315499	up
FPRO_08154	XP_031083521.1	1.43249	0.000409314	0.00315715	up
FPRO_05683	XP_031079718.1	-1.85727	0.000410773	0.00316592	down
FPRO_09905	XP_031083193.1	5.30579	0.00041273	0.00317639	up
FPRO_09339	XP_031082629.1	1.24571	0.000412778	0.00317639	up
FPRO_11840	XP_031086926.1	-1.53041	0.000413107	0.00317643	down
FPRO_06340	XP_031079062.1	2.52827	0.000413764	0.00317743	up
FPRO_00636	XP_031075834.1	-1.23103	0.000413885	0.00317743	down
FPRO_12022	XP_031087106.1	-1.68914	0.000414491	0.0031796	down
FPRO_08170	XP_031083505.1	-2.78574	0.000417792	0.00320104	down
FPRO_04155	XP_031089047.1	-2.06817	0.000418352	0.00320104	down
FPRO_14930	XP_031086428.1	2.20093	0.000418382	0.00320104	up
FPRO_13302	XP_031088169.1	-2.44909	0.00041859	0.00320104	down
FPRO_02437	XP_031077896.1	1.52139	0.000419585	0.00320615	up
FPRO_06600	XP_031078802.1	2.43126	0.000421822	0.00322074	up
FPRO_14197	XP_031084978.1	3.17215	0.000424154	0.00323485	up
FPRO_05861	XP_031079540.1	5.22945	0.000424329	0.00323485	up
FPRO_13233	XP_031088100.1	-1.93589	0.000426587	0.00324954	down
FPRO_11771	XP_031086857.1	2.1161	0.000427939	0.00325731	up
FPRO_10857	XP_031081860.1	1.52763	0.000430538	0.0032742	up
FPRO_12348	XP_031089424.1	-1.50226	0.000430825	0.0032742	down
FPRO_13325	XP_031088191.1	2.40603	0.000431447	0.00327639	up
FPRO_02363	XP_031077970.1	2.13899	0.000433014	0.00328575	up
FPRO_03469	XP_031076864.1	1.74107	0.000438376	0.00332387	up
FPRO_00657	XP_031075814.1	-2.44841	0.000442175	0.00335009	down
FPRO_10387	XP_031081392.1	-1.43416	0.000443242	0.00335558	down
FPRO_10303	XP_031081308.1	1.82436	0.000446121	0.00337311	up
FPRO_02088	XP_031074386.1	-5.53505	0.000446245	0.00337311	down
FPRO_08360	XP_031087520.1	1.6876	0.000448331	0.00338628	up
FPRO_06840	XP_031078562.1	-3.68326	0.000449565	0.00339299	down
FPRO_13502	XP_031088368.1	2.99075	0.000450374	0.00339648	up
FPRO_03072	XP_031077261.1	-1.32728	0.000451887	0.00340427	down
FPRO_10668	XP_031081671.1	-1.39187	0.0004521	0.00340427	down
FPRO_11209	XP_031082212.1	1.6626	0.000453781	0.00341398	up
FPRO_01557	XP_031074916.1	-1.16158	0.000454085	0.00341398	down
FPRO_05991	XP_031079411.1	1.41869	0.000455514	0.00342211	up
FPRO_07976	XP_031083699.1	1.848	0.000457371	0.00343118	up
FPRO_13240	XP_031088107.1	-2.42264	0.00045742	0.00343118	down
FPRO_07210	XP_031078192.1	-2.0183	0.000461778	0.00346122	down
FPRO_14103	XP_031084884.1	-5.5166	0.000464467	0.00347872	down
FPRO_07895	XP_031083780.1	-1.46834	0.000468483	0.00350524	down
FPRO_08531	XP_031087691.1	-1.83395	0.000468722	0.00350524	down
FPRO_02807	XP_031077526.1	-1.57217	0.000469294	0.00350685	down
FPRO_00643	XP_031075828.1	-1.30586	0.000472609	0.00352419	down
FPRO_07853	XP_031083822.1	-1.72126	0.000472716	0.00352419	down
FPRO_08287	XP_031087447.1	-1.86792	0.000472772	0.00352419	down
FPRO_00662	XP_031075809.1	2.00628	0.00047305	0.00352419	up
FPRO_00596	XP_031075874.1	2.51153	0.000475692	0.00354118	up
FPRO_09452	XP_031082742.1	1.92958	0.00047659	0.00354518	up
FPRO_01316	XP_031075157.1	-1.3962	0.00047699	0.00354547	down
FPRO_12304	XP_031089380.1	-2.55928	0.000479679	0.00356119	down
FPRO_08533	XP_031087693.1	-1.24049	0.00047983	0.00356119	down
FPRO_09460	XP_031082750.1	2.21821	0.000481957	0.00357427	up
FPRO_09135	XP_031082426.1	1.66977	0.000483654	0.00358415	up
FPRO_05429	XP_031081122.1	3.43908	0.000484284	0.00358611	up
FPRO_08211	XP_031087371.1	1.80733	0.000485792	0.00359455	up
FPRO_15691	XP_031085668.1	-2.35532	0.000486156	0.00359455	down
FPRO_07779	XP_031083895.1	-1.85103	0.000487301	0.00360031	down
FPRO_07832	XP_031083843.1	1.70354	0.000487792	0.00360122	up
FPRO_14239	XP_031085020.1	2.11566	0.000491036	0.00362245	up
FPRO_11793	XP_031086879.1	-1.88809	0.000491502	0.00362317	down
FPRO_13151	XP_031088018.1	2.49266	0.000493452	0.00363481	up
FPRO_05063	XP_031080756.1	1.9817	0.0004941	0.00363685	up
FPRO_01694	XP_031074779.1	-1.56551	0.000498868	0.0036692	down
FPRO_00929	XP_031075543.1	1.56133	0.000499585	0.00367172	up
FPRO_03308	XP_031077025.1	-1.92272	0.000503038	0.00369253	down
FPRO_08377	XP_031087537.1	-1.58656	0.000503168	0.00369253	down
FPRO_12235	XP_031087318.1	2.65696	0.000503887	0.00369504	up
FPRO_11699	XP_031086786.1	1.52616	0.000506364	0.00371044	up
FPRO_13561	XP_031088427.1	1.56589	0.00050686	0.0037113	up
FPRO_14016	XP_031084798.1	-1.96974	0.000508023	0.00371705	down
FPRO_10018	XP_031083306.1	-3.13716	0.000509697	0.00372652	down
FPRO_07687	XP_031083987.1	-1.49283	0.000512498	0.00374421	down
FPRO_05902	XP_031079499.1	1.64608	0.000515179	0.003761	up
FPRO_15380	XP_031085979.1	1.22487	0.000516116	0.00376504	up
FPRO_06592	XP_031078810.1	-2.25717	0.000518911	0.00378262	down
FPRO_13628	XP_031088492.1	2.05561	0.000522427	0.00380542	up
FPRO_07825	XP_031083850.1	-1.41389	0.000523247	0.00380815	down
FPRO_10941	XP_031081944.1	1.69062	0.000524045	0.00380815	up
FPRO_13329	XP_031088195.1	2.33825	0.000524127	0.00380815	up
FPRO_12434	XP_031089511.1	2.76417	0.000524568	0.00380815	up
FPRO_05276	XP_031080969.1	2.10111	0.000524741	0.00380815	up
FPRO_06757	XP_031078645.1	-1.66081	0.000528233	0.00383066	down
FPRO_11702	XP_031086789.1	2.31402	0.00053007	0.00383656	up
FPRO_11056	XP_031082059.1	-1.6111	0.000530272	0.00383656	down
FPRO_02111	XP_031074363.1	-2.68698	0.000530356	0.00383656	down
FPRO_13930	XP_031084712.1	2.2536	0.000530609	0.00383656	up
FPRO_08720	XP_031087880.1	3.58531	0.000547072	0.00395265	up
FPRO_10273	XP_031081277.1	-2.08466	0.00054747	0.00395265	down
FPRO_00967	XP_031075505.1	-1.69278	0.000551926	0.0039819	down
FPRO_08234	XP_031087394.1	2.7507	0.000552573	0.00398364	up
FPRO_01609	XP_031074864.1	-1.62471	0.000553715	0.00398678	down
FPRO_09713	XP_031083001.1	1.24948	0.000553821	0.00398678	up
FPRO_04330	XP_031080026.1	-1.24414	0.000554493	0.0039887	down
FPRO_05732	XP_031079669.1	-3.07554	0.000561102	0.00403328	down
FPRO_01372	XP_031075101.1	-1.22259	0.000561722	0.00403479	down
FPRO_14934	XP_031086424.1	3.05418	0.000562293	0.00403593	up
FPRO_03937	XP_031089265.1	3.20134	0.000563238	0.00403718	up
FPRO_04173	XP_031089029.1	-1.25851	0.000563405	0.00403718	down
FPRO_08148	XP_031083527.1	-1.3097	0.0005637	0.00403718	down
FPRO_06480	XP_031078922.1	1.93646	0.000569701	0.00407718	up
FPRO_10537	XP_031081540.1	1.21265	0.000572924	0.00409726	up
FPRO_03074	XP_031077259.1	1.33899	0.000575445	0.00411229	up
FPRO_01955	XP_031074518.1	-1.46444	0.000576226	0.00411489	down
FPRO_07956	XP_031083719.1	-1.84257	0.000579368	0.00413167	down
FPRO_06497	XP_031078905.1	1.45966	0.000579418	0.00413167	up
FPRO_05247	XP_031080940.1	-2.82299	0.000584283	0.00416334	down
FPRO_03696	XP_031076637.1	2.61521	0.000586107	0.0041733	up
FPRO_15386	XP_031085973.1	-2.53798	0.000589686	0.00419574	down
FPRO_14538	XP_031085320.1	-1.35549	0.000590418	0.00419587	down
FPRO_12149	XP_031087233.1	2.14455	0.000590921	0.00419587	up
FPRO_12814	XP_031088737.1	-1.2926	0.000590986	0.00419587	down
FPRO_03503	XP_031076830.1	-2.29099	0.000591533	0.00419672	down
FPRO_06173	XP_031079229.1	-1.71928	0.000595859	0.00422139	down
FPRO_13917	XP_031084699.1	1.59006	0.000596066	0.00422139	up
FPRO_03064	XP_031077269.1	-1.25296	0.0005963	0.00422139	down
FPRO_06240	XP_031079162.1	-1.42635	0.000599472	0.00424079	down
FPRO_14084	XP_031084865.1	-2.61906	0.00060378	0.00426819	down
FPRO_11205	XP_031082208.1	-1.62079	0.000605987	0.0042791	down
FPRO_05782	XP_031079619.1	-1.71471	0.000607405	0.0042791	down
FPRO_06047	XP_031079355.1	-1.49014	0.000607454	0.0042791	down
FPRO_02666	XP_031077667.1	-1.86882	0.000607487	0.0042791	down
FPRO_05206	XP_031080899.1	-1.55204	0.000607503	0.0042791	down
FPRO_04426	XP_031080122.1	-1.9093	0.000608951	0.00428482	down
FPRO_14347	XP_031085128.1	1.6585	0.000609187	0.00428482	up
FPRO_03126	XP_031077207.1	-1.56664	0.000614299	0.00431768	down
FPRO_03559	XP_031076774.1	1.29525	0.000615667	0.0043242	up
FPRO_10010	XP_031083298.1	-2.57882	0.000616138	0.00432442	down
FPRO_14659	XP_031085441.1	2.65522	0.000617568	0.00433136	up
FPRO_15170	XP_031086188.1	1.86442	0.000619123	0.00433787	up
FPRO_02436	XP_031077897.1	-1.58958	0.000619448	0.00433787	down
FPRO_05255	XP_031080948.1	2.61427	0.000619822	0.00433787	up
FPRO_08275	XP_031087435.1	1.65063	0.00062483	0.00436981	up
FPRO_06476	XP_031078926.1	1.85205	0.000625595	0.00437204	up
FPRO_00796	XP_031075675.1	-1.20351	0.000627469	0.00438202	down
FPRO_01494	XP_031074979.1	1.82767	0.000628846	0.00438852	up
FPRO_10654	XP_031081657.1	-1.56316	0.000629346	0.00438888	down
FPRO_11073	XP_031082076.1	2.88209	0.000630333	0.00439265	up
FPRO_10229	XP_031081232.1	1.4579	0.000632349	0.00440357	up
FPRO_15747	XP_031085612.1	1.64645	0.000633596	0.00440904	up
FPRO_07752	XP_031083922.1	2.08632	0.000634033	0.00440904	up
FPRO_05114	XP_031080807.1	-1.62846	0.000636175	0.00442081	down
FPRO_11809	XP_031086895.1	-1.5893	0.000639735	0.00444091	down
FPRO_01549	XP_031074924.1	-1.68615	0.000639989	0.00444091	down
FPRO_08062	XP_031083613.1	1.2278	0.000640425	0.00444091	up
FPRO_07082	XP_031078320.1	2.29076	0.000645573	0.00447345	up
FPRO_09455	XP_031082745.1	1.38256	0.000653818	0.00452739	up
FPRO_11803	XP_031086889.1	-1.55517	0.000655093	0.00453024	down
FPRO_05686	XP_031079715.1	-2.04801	0.000655692	0.00453024	down
FPRO_11003	XP_031082006.1	1.79373	0.000656129	0.00453024	up
FPRO_12734	XP_031088657.1	1.81717	0.000656395	0.00453024	up
FPRO_07821	XP_031083854.1	-2.39769	0.000656536	0.00453024	down
FPRO_02048	XP_031074425.1	-1.75551	0.000658774	0.00454249	down
FPRO_11536	XP_031086623.1	-1.86726	0.000661305	0.00455674	down
FPRO_02677	XP_031077656.1	1.68136	0.000662373	0.0045609	up
FPRO_01858	XP_031074615.1	-2.99752	0.000663408	0.00456482	down
FPRO_08408	XP_031087568.1	1.95377	0.000667546	0.00459008	up
FPRO_01266	XP_031075207.1	-1.21872	0.00066967	0.00459825	down
FPRO_05864	XP_031079537.1	1.53242	0.00066967	0.00459825	up
FPRO_00231	XP_031076239.1	-1.90165	0.000671691	0.0046089	down
FPRO_06269	XP_031079133.1	1.35744	0.000674402	0.00462427	up
FPRO_02752	XP_031077581.1	2.40523	0.000679587	0.00465567	up
FPRO_06807	XP_031078595.1	-4.03005	0.000679961	0.00465567	down
FPRO_02403	XP_031077930.1	1.65744	0.000680404	0.00465567	up
FPRO_03336	XP_031076997.1	1.19423	0.000690586	0.00472205	up
FPRO_05823	XP_031079578.1	1.75881	0.000696098	0.00475643	up
FPRO_00381	XP_031076089.1	1.72396	0.000701136	0.00478752	up
FPRO_01148	XP_031075324.1	1.81859	0.000706526	0.00482097	up
FPRO_01114	XP_031075358.1	-1.16142	0.000709535	0.00483814	down
FPRO_00266	XP_031076204.1	-2.16912	0.000710552	0.00484171	down
FPRO_07877	XP_031083798.1	-1.24627	0.000713653	0.00485947	down
FPRO_10205	XP_031081208.1	-1.55475	0.000720419	0.00490215	down
FPRO_05769	XP_031079632.1	2.65569	0.000724728	0.00492805	up
FPRO_05033	XP_031080726.1	-1.78207	0.000727112	0.00493867	down
FPRO_04046	XP_031089156.1	2.64758	0.000727296	0.00493867	up
FPRO_12825	XP_031088748.1	2.15536	0.000732441	0.00497017	up
FPRO_03566	XP_031076767.1	-2.17918	0.0007344	0.00498002	down
FPRO_06690	XP_031078712.1	-2.66399	0.000735634	0.00498495	down
FPRO_03278	XP_031077055.1	1.5148	0.000736289	0.00498595	up
FPRO_08922	XP_031089839.1	-1.59019	0.000737254	0.00498904	down
FPRO_12564	XP_031089640.1	1.48247	0.000739359	0.00499984	up
FPRO_04516	XP_031080212.1	-2.07191	0.000742429	0.00501714	down
FPRO_05771	XP_031079630.1	1.92443	0.000747325	0.00504675	up
FPRO_01856	XP_031074617.1	-2.20699	0.000747996	0.00504782	down
FPRO_13357	XP_031088223.1	1.62184	0.000749581	0.00505504	up
FPRO_04539	XP_031080235.1	-1.35464	0.000751094	0.00506176	down
FPRO_01468	XP_031075005.1	1.3709	0.000753004	0.00507116	up
FPRO_03685	XP_031076648.1	-1.19111	0.000753864	0.00507347	down
FPRO_15607	XP_031085752.1	4.12903	0.000759887	0.0051105	up
FPRO_01630	XP_031074843.1	3.03432	0.000761763	0.00511961	up
FPRO_07623	XP_031084051.1	1.63317	0.000764416	0.00513393	up
FPRO_10778	XP_031081781.1	-1.21605	0.000766839	0.00514668	down
FPRO_06331	XP_031079071.1	1.4158	0.000770764	0.00516949	up
FPRO_07698	XP_031083976.1	1.42992	0.000771834	0.00517313	up
FPRO_11059	XP_031082062.1	-1.39709	0.000772461	0.0051738	down
FPRO_07428	XP_031084246.1	-1.66958	0.000774373	0.00518307	down
FPRO_05174	XP_031080867.1	2.8876	0.000775488	0.00518309	up
FPRO_04125	XP_031089077.1	-3.08944	0.000775607	0.00518309	down
FPRO_11103	XP_031082106.1	1.49109	0.000775958	0.00518309	up
FPRO_09792	XP_031083080.1	2.76768	0.000776816	0.00518528	up
FPRO_04980	XP_031080674.1	4.23235	0.000779652	0.00520068	up
FPRO_09812	XP_031083100.1	1.33496	0.000780506	0.00520284	up
FPRO_03715	XP_031076618.1	-2.06015	0.000781738	0.00520733	down
FPRO_14475	XP_031085256.1	-1.76744	0.00078224	0.00520733	down
FPRO_06414	XP_031078988.1	-2.90207	0.000785628	0.00522634	down
FPRO_07509	XP_031084165.1	1.88807	0.00078647	0.0052284	up
FPRO_01020	XP_031075452.1	-1.18946	0.000794982	0.00528141	down
FPRO_03361	XP_031076972.1	1.17067	0.000798888	0.00530378	up
FPRO_14227	XP_031085008.1	-1.31842	0.000800485	0.00530774	down
FPRO_03945	XP_031089257.1	-2.75411	0.000800566	0.00530774	down
FPRO_10085	XP_031083373.1	4.451	0.000807526	0.00535027	up
FPRO_06741	XP_031078661.1	-1.30372	0.000809241	0.00535525	down
FPRO_10764	XP_031081767.1	-1.22463	0.000809369	0.00535525	down
FPRO_06094	XP_031079308.1	1.41094	0.000811942	0.00536471	up
FPRO_07467	XP_031084207.1	3.23297	0.000811983	0.00536471	up
FPRO_10766	XP_031081769.1	1.49767	0.000812437	0.00536471	up
FPRO_09619	XP_031082908.1	1.55361	0.000815723	0.00538167	up
FPRO_06548	XP_031078854.1	2.05374	0.000816102	0.00538167	up
FPRO_10782	XP_031081785.1	-2.13944	0.000817258	0.00538568	down
FPRO_01132	XP_031075340.1	-1.40936	0.000820627	0.00540425	down
FPRO_00460	XP_031076010.1	-1.60793	0.000824522	0.00542626	down
FPRO_18260		-2.52037	0.000828662	0.00544985	down
FPRO_04856	XP_031080551.1	-1.12265	0.000834596	0.00548521	down
FPRO_15052	XP_031086306.1	2.41532	0.000836854	0.00549637	up
FPRO_06477	XP_031078925.1	2.03708	0.000837466	0.00549671	up
FPRO_07795	XP_031083879.1	1.50292	0.000840743	0.00551256	up
FPRO_11805	XP_031086891.1	-1.6998	0.000841003	0.00551256	down
FPRO_03521	XP_031076812.1	1.41017	0.000844481	0.00553166	up
FPRO_10796	XP_031081799.1	-2.02469	0.000850293	0.00556602	down
FPRO_08381	XP_031087541.1	-1.58576	0.000851751	0.00557185	down
FPRO_11594	XP_031086681.1	2.95148	0.000853598	0.00558021	up
FPRO_05784	XP_031079617.1	1.531	0.000854444	0.00558203	up
FPRO_04491	XP_031080187.1	-1.54338	0.000855031	0.00558215	down
FPRO_08147	XP_031083528.1	-1.26951	0.000856696	0.0055893	down
FPRO_11050	XP_031082053.1	-1.46935	0.000860237	0.00560867	down
FPRO_06493	XP_031078909.1	-2.41373	0.000862454	0.0056194	down
FPRO_00955	XP_031075517.1	2.26992	0.000864121	0.00562653	up
FPRO_06516	XP_031078886.1	-3.0808	0.000864805	0.00562725	down
FPRO_06451	XP_031078951.1	1.96056	0.000866891	0.00563709	up
FPRO_06438	XP_031078964.1	-1.88333	0.00086798	0.00564044	down
FPRO_04107	XP_031089095.1	1.99939	0.000870454	0.00564649	up
FPRO_02700	XP_031077633.1	-2.16351	0.000870487	0.00564649	down
FPRO_15297	XP_031086061.1	2.17219	0.000870638	0.00564649	up
FPRO_01126	XP_031075346.1	1.25411	0.000872985	0.00565604	up
FPRO_05655	XP_031079746.1	-2.38584	0.000873262	0.00565604	down
FPRO_14043	XP_031084824.1	2.37839	0.000880357	0.00569823	up
FPRO_14567	XP_031085349.1	-2.35451	0.000883914	0.00571749	down
FPRO_08778	XP_031087938.1	-1.65791	0.000887077	0.00573418	down
FPRO_12064	XP_031087148.1	-1.36097	0.000890554	0.00575286	down
FPRO_03263	XP_031077070.1	-2.23239	0.00089712	0.0057885	down
FPRO_10066	XP_031083354.1	1.50787	0.000897542	0.0057885	up
FPRO_05969	XP_031079433.1	-1.68297	0.000898238	0.0057885	down
FPRO_03353	XP_031076980.1	-1.75853	0.00089843	0.0057885	down
FPRO_05971	XP_031079431.1	2.48353	0.000901909	0.00580657	up
FPRO_04382	XP_031080078.1	-2.17663	0.000902417	0.00580657	down
FPRO_01795	XP_031074678.1	-1.77994	0.000905562	0.005823	down
FPRO_02813	XP_031077520.1	1.94878	0.000909219	0.00584258	up
FPRO_07273	XP_031084401.1	-2.76867	0.000909798	0.00584258	down
FPRO_07809	XP_031083866.1	-1.29901	0.000912386	0.00585537	down
FPRO_03256	XP_031077077.1	-3.56703	0.000914751	0.00586672	down
FPRO_10690	XP_031081693.1	-1.34294	0.000922057	0.00590944	down
FPRO_09816	XP_031083104.1	1.20083	0.000922617	0.00590944	up
FPRO_06079	XP_031079323.1	1.90125	0.000926833	0.00593257	up
FPRO_01421	XP_031075052.1	1.47178	0.000932412	0.0059644	up
FPRO_14178	XP_031084959.1	-1.56907	0.000938346	0.00599845	down
FPRO_13195	XP_031088062.1	1.67746	0.000942294	0.00601977	up
FPRO_04857	XP_031080552.1	1.24027	0.000945734	0.00603782	up
FPRO_14688	XP_031085470.1	-3.13537	0.000946423	0.00603829	down
FPRO_04560	XP_031080256.1	1.15449	0.000947962	0.00604418	up
FPRO_03022	XP_031077311.1	-1.17194	0.000961466	0.0061263	down
FPRO_06512	XP_031078890.1	1.22824	0.000963642	0.00613619	up
FPRO_09479	XP_031082769.1	-1.59094	0.000970671	0.00617694	down
FPRO_03997	XP_031089205.1	3.33814	0.000973894	0.00619343	up
FPRO_11832	XP_031086918.1	1.49856	0.000974934	0.00619604	up
FPRO_05934	XP_031079468.1	1.21713	0.00098896	0.00628111	up
FPRO_13792	XP_031084574.1	2.32026	0.000992328	0.00629843	up
FPRO_07588	XP_031084086.1	1.21948	0.00100722	0.00638879	up
FPRO_05167	XP_031080860.1	2.77758	0.00101221	0.00641368	up
FPRO_02640	XP_031077693.1	-1.24017	0.00101245	0.00641368	down
FPRO_10953	XP_031081956.1	2.55444	0.00101664	0.00643231	up
FPRO_03065	XP_031077268.1	-1.14883	0.00101702	0.00643231	down
FPRO_13849	XP_031084631.1	3.38099	0.00101735	0.00643231	up
FPRO_05125	XP_031080818.1	1.352	0.00102074	0.00644961	up
FPRO_06672	XP_031078730.1	1.90711	0.00103506	0.00653584	up
FPRO_04917	XP_031080611.1	1.42641	0.00103605	0.0065379	up
FPRO_13941	XP_031084723.1	1.44718	0.00104138	0.00656732	up
FPRO_11292	XP_031082294.1	2.40634	0.00104398	0.00657948	up
FPRO_01520	XP_031074953.1	-1.64935	0.0010452	0.00658294	down
FPRO_07688	XP_031083986.1	-1.67258	0.00104634	0.0065859	down
FPRO_08317	XP_031087477.1	1.63055	0.00104983	0.00660364	up
FPRO_07963	XP_031083712.1	1.34237	0.00105352	0.00662262	up
FPRO_01077	XP_031075395.1	-1.20834	0.00105804	0.00664277	down
FPRO_12815	XP_031088738.1	1.34695	0.00105808	0.00664277	up
FPRO_00795	XP_031075676.1	2.22583	0.00106022	0.00664786	up
FPRO_08324	XP_031087484.1	-1.40637	0.00106025	0.00664786	down
FPRO_09456	XP_031082746.1	1.51598	0.00106281	0.00665642	up
FPRO_08143	XP_031083532.1	-1.34958	0.00106297	0.00665642	down
FPRO_04624	XP_031080320.1	-4.14159	0.00106474	0.00666327	down
FPRO_00695	XP_031075776.1	-1.42729	0.00107021	0.00669323	down
FPRO_15088	XP_031086270.1	-2.36468	0.00107649	0.00672822	down
FPRO_12923	XP_031088846.1	-1.85414	0.00107771	0.00673158	down
FPRO_11823	XP_031086909.1	-1.73308	0.00108058	0.00674522	down
FPRO_09669	XP_031082958.1	1.50642	0.00108394	0.00676189	up
FPRO_01283	XP_031075190.1	1.87342	0.00109383	0.00681675	up
FPRO_08173	XP_031083502.1	-1.31466	0.00109412	0.00681675	down
FPRO_00461	XP_031076009.1	1.36443	0.00110481	0.00687895	up
FPRO_10516	XP_031081520.1	-1.29611	0.00111104	0.0069134	down
FPRO_08479	XP_031087639.1	1.68154	0.00111272	0.00691586	up
FPRO_00931	XP_031075541.1	-1.46264	0.00111285	0.00691586	down
FPRO_04230	XP_031079926.1	1.84585	0.00111473	0.00691957	up
FPRO_13374	XP_031088240.1	-1.27245	0.00111555	0.00691957	down
FPRO_06317	XP_031079085.1	1.57257	0.00111556	0.00691957	up
FPRO_01794	XP_031074679.1	-1.50071	0.0011221	0.00695577	down
FPRO_08089	XP_031083586.1	1.25199	0.00112955	0.0069959	up
FPRO_02462	XP_031077871.1	1.55584	0.00113	0.0069959	up
FPRO_01508	XP_031074965.1	-1.21533	0.00113115	0.0069986	down
FPRO_05139	XP_031080832.1	1.4182	0.0011339	0.00701119	up
FPRO_04538	XP_031080234.1	1.29388	0.00114393	0.00706876	up
FPRO_08505	XP_031087665.1	-1.87618	0.00114489	0.00707026	down
FPRO_01860	XP_031074613.1	-2.70204	0.00114852	0.00708823	down
FPRO_06400	XP_031079002.1	1.42677	0.0011654	0.00718783	up
FPRO_04672	XP_031080368.1	-1.20838	0.00116931	0.00720747	down
FPRO_11975	XP_031087060.1	-1.33973	0.00117485	0.00723705	down
FPRO_10521	XP_031081524.1	-3.30898	0.0011779	0.00725129	down
FPRO_15319	XP_031086039.1	2.82479	0.00117869	0.00725161	up
FPRO_04404	XP_031080100.1	-1.21911	0.00118102	0.00726139	down
FPRO_06582	XP_031078820.1	-2.11161	0.00118205	0.00726316	down
FPRO_11601	XP_031086688.1	-1.58244	0.00118318	0.00726555	down
FPRO_03146	XP_031077187.1	1.66203	0.00118423	0.0072675	up
FPRO_04162	XP_031089040.1	-1.41173	0.00118996	0.00729805	down
FPRO_01387	XP_031075086.1	-1.4268	0.00119143	0.00730254	down
FPRO_08258	XP_031087418.1	-1.61748	0.00120053	0.00735374	down
FPRO_15477	XP_031085882.1	1.48837	0.00120841	0.00739383	up
FPRO_06096	XP_031079306.1	-2.72859	0.00120859	0.00739383	down
FPRO_06138	XP_031079264.1	-1.73281	0.00121187	0.00740934	down
FPRO_06288	XP_031079114.1	1.19934	0.0012135	0.00741463	up
FPRO_06052	XP_031079350.1	-1.49232	0.00121626	0.00742693	down
FPRO_10381	XP_031081386.1	1.14744	0.00122148	0.00744594	up
FPRO_08440	XP_031087600.1	-1.62471	0.00122167	0.00744594	down
FPRO_03163	XP_031077170.1	1.44052	0.0012218	0.00744594	up
FPRO_14364	XP_031085145.1	1.96451	0.00122241	0.00744594	up
FPRO_09551	XP_031082840.1	-1.38369	0.0012232	0.00744613	down
FPRO_08644	XP_031087804.1	-2.60979	0.00123167	0.00748923	down
FPRO_09599	XP_031082888.1	1.38839	0.00123181	0.00748923	up
FPRO_10829	XP_031081832.1	-1.36254	0.00123994	0.00753403	down
FPRO_08093	XP_031083582.1	1.51607	0.00124355	0.00755128	up
FPRO_08564	XP_031087724.1	-1.15788	0.0012465	0.00756183	down
FPRO_03063	XP_031077270.1	-1.56056	0.00124686	0.00756183	down
FPRO_09064	XP_031089698.1	-1.44258	0.0012476	0.00756183	down
FPRO_13059	XP_031088982.1	1.53511	0.00125034	0.00757053	up
FPRO_09791	XP_031083079.1	1.34302	0.00125057	0.00757053	up
FPRO_08010	XP_031083665.1	3.16073	0.00125212	0.00757521	up
FPRO_00413	XP_031076057.1	-1.93974	0.00125566	0.00758778	down
FPRO_02959	XP_031077374.1	-1.44662	0.00125574	0.00758778	down
FPRO_08179	XP_031083496.1	1.87413	0.00126773	0.0076535	up
FPRO_02803	XP_031077530.1	1.17267	0.00126818	0.0076535	up
FPRO_13346	XP_031088212.1	2.74462	0.00127	0.00765977	up
FPRO_04969	XP_031080663.1	1.31019	0.00127431	0.00768104	up
FPRO_08581	XP_031087741.1	-1.23002	0.00127929	0.00770636	down
FPRO_06843	XP_031078559.1	-1.72097	0.00128572	0.00774031	down
FPRO_03487	XP_031076846.1	-2.17227	0.00129003	0.00775811	down
FPRO_07711	XP_031083963.1	1.42552	0.00129025	0.00775811	up
FPRO_14568	XP_031085350.1	-2.16229	0.00129198	0.00776371	down
FPRO_08169	XP_031083506.1	-1.52864	0.00129419	0.00777227	down
FPRO_03153	XP_031077180.1	-1.32008	0.00129566	0.00777636	down
FPRO_04244	XP_031079940.1	-1.33381	0.00130512	0.0078283	down
FPRO_10903	XP_031081906.1	1.60958	0.00131236	0.00786697	up
FPRO_02954	XP_031077379.1	-1.21863	0.00131769	0.00789373	down
FPRO_02679	XP_031077654.1	1.72342	0.00131844	0.00789373	up
FPRO_11770	XP_031086856.1	1.83202	0.00133034	0.00795917	up
FPRO_00990	XP_031075482.1	1.37308	0.00133099	0.00795917	up
FPRO_10598	XP_031081601.1	-1.3217	0.00133528	0.00797807	down
FPRO_05844	XP_031079557.1	1.46667	0.00133577	0.00797807	up
FPRO_06291	XP_031079111.1	-1.37485	0.00134246	0.00800315	down
FPRO_09283	XP_031082574.1	-1.18074	0.00134362	0.00800315	down
FPRO_13177	XP_031088044.1	3.08289	0.00134365	0.00800315	up
FPRO_08160	XP_031083515.1	1.40122	0.00134372	0.00800315	up
FPRO_12794	XP_031088717.1	1.35855	0.00134405	0.00800315	up
FPRO_07728	XP_031083946.1	4.15668	0.00134623	0.00801127	up
FPRO_09569	XP_031082858.1	1.08546	0.0013617	0.00809847	up
FPRO_01560	XP_031074913.1	-1.23996	0.0013822	0.00821535	down
FPRO_10583	XP_031081586.1	-1.24501	0.00138303	0.00821535	down
FPRO_04958	XP_031080652.1	-1.50209	0.0013945	0.00827848	down
FPRO_00117	XP_031076353.1	-1.36946	0.00139762	0.00829199	down
FPRO_10114	XP_031083402.1	-2.50047	0.00140017	0.00830212	down
FPRO_05024	XP_031080718.1	-1.11637	0.00140135	0.00830406	down
FPRO_07051	XP_031078351.1	1.41513	0.00140699	0.00833245	up
FPRO_06152	XP_031079250.1	-1.42678	0.00141059	0.00834026	down
FPRO_04908	XP_031080603.1	2.11064	0.00141094	0.00834026	up
FPRO_13608	XP_031088474.1	-2.28477	0.001411	0.00834026	down
FPRO_04711	XP_031080407.1	-1.19679	0.0014117	0.00834026	down
FPRO_00519	XP_031075951.1	2.532	0.00141459	0.00835226	up
FPRO_00412	XP_031076058.1	-1.4172	0.00141855	0.00837061	down
FPRO_00727	XP_031075744.1	2.23658	0.00142244	0.00838856	up
FPRO_05789	XP_031079612.1	1.57635	0.00142606	0.00840488	up
FPRO_03099	XP_031077234.1	1.15838	0.00143558	0.00845591	up
FPRO_13084	XP_031089007.1	-1.10508	0.00143686	0.00845837	down
FPRO_03058	XP_031077275.1	-1.86816	0.00144138	0.00847989	down
FPRO_01741	XP_031074732.1	1.40658	0.00144894	0.00851927	up
FPRO_00712	XP_031075759.1	-1.43761	0.001459	0.00857327	down
FPRO_13145	XP_031088012.1	1.82211	0.00146185	0.00858487	up
FPRO_01092	XP_031075380.1	-1.18536	0.00146392	0.00858746	down
FPRO_08701	XP_031087861.1	-3.84889	0.00146404	0.00858746	down
FPRO_15602	XP_031085757.1	-1.59485	0.00146906	0.00861178	down
FPRO_00980	XP_031075492.1	-1.15907	0.00148269	0.00868649	down
FPRO_07903	XP_031083772.1	1.9073	0.00148764	0.00871029	up
FPRO_15741	XP_031085618.1	2.67289	0.00150997	0.00883573	up
FPRO_12201	XP_031087284.1	1.83209	0.00151264	0.00884611	up
FPRO_04967	XP_031080661.1	2.13213	0.00153097	0.00894392	up
FPRO_04526	XP_031080222.1	-1.52073	0.00153119	0.00894392	down
FPRO_05560	XP_031079841.1	5.2108	0.00153626	0.00896819	up
FPRO_13350	XP_031088216.1	1.37986	0.0015374	0.00896953	up
FPRO_09980	XP_031083268.1	1.65962	0.00153911	0.00897421	up
FPRO_14995	XP_031086363.1	-1.59631	0.00154403	0.00899752	down
FPRO_03182	XP_031077151.1	-1.24455	0.00155346	0.00904709	down
FPRO_05085	XP_031080778.1	-1.38383	0.00155589	0.0090559	down
FPRO_06053	XP_031079349.1	-1.63075	0.00156077	0.00907892	down
FPRO_04781	XP_031080477.1	1.18334	0.00156341	0.00908889	up
FPRO_02986	XP_031077347.1	2.56124	0.00156586	0.00909776	up
FPRO_03390	XP_031076943.1	1.38808	0.00156751	0.00910192	up
FPRO_10700	XP_031081703.1	-1.54372	0.00156873	0.00910361	down
FPRO_07274	XP_031084400.1	-2.64393	0.00156965	0.00910361	down
FPRO_06050	XP_031079352.1	1.04119	0.00157228	0.00911348	up
FPRO_18159		-2.93113	0.0015776	0.0091389	down
FPRO_06274	XP_031079128.1	1.51127	0.00158071	0.00914862	up
FPRO_06491	XP_031078911.1	-1.68741	0.00158114	0.00914862	down
FPRO_15520	XP_031085839.1	2.94122	0.00158212	0.00914892	up
FPRO_02859	XP_031077474.1	-1.56019	0.00158539	0.0091624	down
FPRO_06294	XP_031079108.1	1.68139	0.00158752	0.00916935	up
FPRO_12950	XP_031088873.1	-1.17969	0.00158861	0.00917025	down
FPRO_02933	XP_031077400.1	-1.36998	0.00159078	0.00917736	down
FPRO_00416	XP_031076054.1	1.50417	0.00160049	0.00922795	up
FPRO_18136		1.61879	0.00160151	0.00922843	up
FPRO_09441	XP_031082731.1	-1.56224	0.001607	0.00925465	down
FPRO_11008	XP_031082011.1	1.73331	0.0016087	0.00925609	up
FPRO_04774	XP_031080470.1	1.71475	0.00160966	0.00925609	up
FPRO_04255	XP_031079951.1	1.22071	0.00161008	0.00925609	up
FPRO_09503	XP_031082792.1	-1.0682	0.00162097	0.00931321	down
FPRO_09769	XP_031083057.1	1.56996	0.00162304	0.00931966	up
FPRO_07813	XP_031083862.1	-1.95899	0.00162844	0.00934521	down
FPRO_04796	XP_031080491.1	-1.19047	0.00164276	0.00942188	down
FPRO_07764	XP_031083910.1	-1.18738	0.00164869	0.00945039	down
FPRO_03105	XP_031077228.1	1.32237	0.00165079	0.00945688	up
FPRO_04683	XP_031080379.1	-1.30594	0.00166556	0.00953594	down
FPRO_13083	XP_031089006.1	-1.16814	0.00167682	0.00959483	down
FPRO_10862	XP_031081865.1	-1.0603	0.00168649	0.00964455	down
FPRO_15172	XP_031086186.1	1.77045	0.0016887	0.00965153	up
FPRO_04842	XP_031080537.1	-1.2456	0.00170174	0.00972043	down
FPRO_13015	XP_031088938.1	1.85964	0.00171042	0.0097643	up
FPRO_13115	XP_031087982.1	-1.9187	0.00172329	0.00982689	down
FPRO_05830	XP_031079571.1	-2.60553	0.00172338	0.00982689	down
FPRO_00459	XP_031076011.1	-2.79932	0.00172606	0.00983645	down
FPRO_04955	XP_031080649.1	1.66253	0.00172888	0.00984679	up
FPRO_02242	XP_031078090.1	-1.65579	0.00174023	0.00990567	down
FPRO_07689	XP_031083985.1	-1.48646	0.00175102	0.00996133	down
FPRO_14357	XP_031085138.1	1.95423	0.00175549	0.00997326	up
FPRO_12935	XP_031088858.1	-1.68497	0.00175599	0.00997326	down
FPRO_12047	XP_031087131.1	-1.58216	0.00175616	0.00997326	down
FPRO_04877	XP_031080572.1	1.87586	0.00175726	0.0099737	up
FPRO_01370	XP_031075103.1	1.7017	0.00176349	0.0100023	up
FPRO_06005	XP_031079397.1	-1.20973	0.00176434	0.0100023	down
FPRO_02964	XP_031077369.1	-1.23976	0.00176706	0.010012	down
FPRO_03411	XP_031076922.1	1.15287	0.00178564	0.0101114	up
FPRO_03158	XP_031077175.1	-1.21499	0.0017956	0.010162	down
FPRO_13085	XP_031089008.1	-1.09245	0.00180033	0.0101829	down
FPRO_13210	XP_031088077.1	-1.21902	0.0018075	0.0102175	down
FPRO_11162	XP_031082165.1	1.50126	0.00181223	0.0102384	up
FPRO_01296	XP_031075177.1	-2.77953	0.00181466	0.0102462	down
FPRO_04549	XP_031080245.1	-1.17054	0.00182482	0.0102943	down
FPRO_05270	XP_031080963.1	-1.54192	0.00182527	0.0102943	down
FPRO_05585	XP_031079816.1	3.9288	0.00182918	0.0103068	up
FPRO_09727	XP_031083015.1	-1.05329	0.00183026	0.0103068	down
FPRO_06425	XP_031078977.1	1.49912	0.00183063	0.0103068	up
FPRO_00722	XP_031075749.1	-1.27271	0.00183711	0.0103373	down
FPRO_00831	XP_031075641.1	-1.61623	0.00183824	0.0103377	down
FPRO_11747	XP_031086833.1	1.42003	0.00184649	0.0103782	up
FPRO_09152	XP_031082443.1	-1.16812	0.00184851	0.0103836	down
FPRO_07815	XP_031083860.1	1.17618	0.00185091	0.0103912	up
FPRO_06225	XP_031079177.1	-1.38944	0.00185357	0.0104001	down
FPRO_15343	XP_031086016.1	2.91505	0.00185574	0.0104064	up
FPRO_13072	XP_031088995.1	-1.41907	0.00186598	0.0104578	down
FPRO_01091	XP_031075381.1	-1.48192	0.00186791	0.0104614	down
FPRO_15928	XP_031090069.1	-1.55538	0.00186875	0.0104614	down
FPRO_02869	XP_031077464.1	1.52695	0.00187254	0.0104766	up
FPRO_03466	XP_031076867.1	-1.15757	0.0018781	0.0105018	down
FPRO_14035	XP_031084816.1	2.67963	0.00187962	0.0105043	up
FPRO_03342	XP_031076991.1	-1.38631	0.00188281	0.0105127	down
FPRO_09916	XP_031083204.1	-1.63034	0.00188327	0.0105127	down
FPRO_09789	XP_031083077.1	-1.56591	0.00188943	0.0105411	down
FPRO_11966	XP_031087051.1	1.6678	0.00189457	0.0105637	up
FPRO_03734	XP_031076599.1	-2.2144	0.00190139	0.0105958	down
FPRO_11871	XP_031086957.1	-1.4675	0.00190902	0.0106322	down
FPRO_01715	XP_031074758.1	-1.08004	0.00191159	0.010636	down
FPRO_09394	XP_031082684.1	-1.31451	0.00191186	0.010636	down
FPRO_08319	XP_031087479.1	2.82717	0.00192317	0.0106929	up
FPRO_06949	XP_031078453.1	-1.65637	0.00192927	0.0107147	down
FPRO_14266	XP_031085047.1	-1.42739	0.00192928	0.0107147	down
FPRO_04552	XP_031080248.1	-1.31754	0.00193624	0.0107473	down
FPRO_08281	XP_031087441.1	-1.45996	0.0019421	0.0107655	down
FPRO_10362	XP_031081367.1	-1.21761	0.00194269	0.0107655	down
FPRO_14418	XP_031085199.1	1.94479	0.00194281	0.0107655	up
FPRO_07028	XP_031078374.1	2.04021	0.00194618	0.0107781	up
FPRO_08384	XP_031087544.1	1.21925	0.00194778	0.0107809	up
FPRO_04695	XP_031080391.1	-1.20083	0.00196975	0.0108963	down
FPRO_08465	XP_031087625.1	-1.29173	0.00197673	0.0109288	down
FPRO_08135	XP_031083540.1	-1.07908	0.00197866	0.0109333	down
FPRO_12033	XP_031087117.1	1.13789	0.00198031	0.0109362	up
FPRO_13150	XP_031088017.1	1.31206	0.00199649	0.0110194	up
FPRO_11761	XP_031086847.1	1.17244	0.00200217	0.0110446	up
FPRO_12330	XP_031089406.1	2.2649	0.00201543	0.0111114	up
FPRO_04642	XP_031080338.1	1.67151	0.00203337	0.0112041	up
FPRO_13639	XP_031088503.1	-1.40143	0.00203476	0.0112054	down
FPRO_04698	XP_031080394.1	-1.32257	0.00203858	0.0112202	down
FPRO_07879	XP_031083796.1	-1.28271	0.0020414	0.0112294	down
FPRO_01220	XP_031075253.1	1.25343	0.00204486	0.0112403	up
FPRO_01233	XP_031075240.1	-1.41297	0.00204568	0.0112403	down
FPRO_02461	XP_031077872.1	2.83216	0.00205095	0.011263	up
FPRO_02642	XP_031077691.1	-1.24101	0.00205728	0.0112815	down
FPRO_08005	XP_031083670.1	-1.26614	0.00205803	0.0112815	down
FPRO_06361	XP_031079041.1	1.0845	0.00205805	0.0112815	up
FPRO_03101	XP_031077232.1	1.1668	0.00205891	0.0112815	up
FPRO_03678	XP_031076655.1	-1.66116	0.00206404	0.0112987	down
FPRO_03679	XP_031076654.1	-1.33861	0.00206435	0.0112987	down
FPRO_10217	XP_031081220.1	2.55317	0.0020672	0.0113021	up
FPRO_05445	XP_031081138.1	-2.28493	0.00206728	0.0113021	down
FPRO_01733	XP_031074740.1	-2.79834	0.00207001	0.0113108	down
FPRO_07629	XP_031084045.1	1.17915	0.00207351	0.0113236	up
FPRO_10367	XP_031081372.1	-1.16262	0.0020748	0.0113243	down
FPRO_05196	XP_031080889.1	1.48611	0.00207891	0.0113405	up
FPRO_14511	XP_031085293.1	-2.12883	0.00208766	0.0113819	down
FPRO_12020	XP_031087104.1	2.14932	0.00209021	0.011388	up
FPRO_12974	XP_031088897.1	-1.34121	0.0020911	0.011388	down
FPRO_01760	XP_031074713.1	1.49819	0.00209577	0.0114056	up
FPRO_03171	XP_031077162.1	1.88096	0.00209667	0.0114056	up
FPRO_07852	XP_031083823.1	1.78666	0.00210655	0.011453	up
FPRO_00525	XP_031075945.1	-1.88625	0.00210916	0.0114581	down
FPRO_07200	XP_031078202.1	3.3974	0.00210981	0.0114581	up
FPRO_01068	XP_031075404.1	1.51244	0.00211455	0.0114775	up
FPRO_05298	XP_031080991.1	-1.17025	0.00211578	0.0114778	down
FPRO_13173	XP_031088040.1	-1.53738	0.00212315	0.0115114	down
FPRO_04442	XP_031080138.1	1.52899	0.00212574	0.0115191	up
FPRO_09593	XP_031082882.1	-1.5666	0.00213309	0.0115526	down
FPRO_08892	XP_031089869.1	2.73031	0.0021398	0.0115825	up
FPRO_12623	XP_031088546.1	-3.23311	0.00214407	0.0115877	down
FPRO_09526	XP_031082815.1	-1.33423	0.00214442	0.0115877	down
FPRO_13201	XP_031088068.1	1.38564	0.00214589	0.0115877	up
FPRO_13918	XP_031084700.1	1.2442	0.00214603	0.0115877	up
FPRO_08077	XP_031083598.1	1.10489	0.00214665	0.0115877	up
FPRO_10365	XP_031081370.1	-2.15485	0.00215186	0.0116094	down
FPRO_15561	XP_031085798.1	1.34162	0.00215726	0.0116298	up
FPRO_08944	XP_031089818.1	-2.05246	0.00215801	0.0116298	down
FPRO_00666	XP_031075805.1	1.40436	0.00216163	0.0116429	up
FPRO_05887	XP_031079514.1	-1.61631	0.00216284	0.011643	down
FPRO_04545	XP_031080241.1	-2.19453	0.00216718	0.01166	down
FPRO_13383	XP_031088249.1	-1.45075	0.00216967	0.011667	down
FPRO_05990	XP_031079412.1	-1.29573	0.0021719	0.0116726	down
FPRO_03542	XP_031076791.1	-1.25973	0.0021799	0.0117063	down
FPRO_01879	XP_031074594.1	-1.33328	0.00218055	0.0117063	down
FPRO_07755	XP_031083919.1	-1.2504	0.00218626	0.0117305	down
FPRO_07742	XP_031083932.1	1.16154	0.00219611	0.011777	up
FPRO_13635	XP_031088499.1	1.84025	0.00220093	0.0117963	up
FPRO_05944	XP_031079458.1	-1.09655	0.0022078	0.011825	down
FPRO_05603	XP_031079798.1	2.15244	0.00220933	0.011825	up
FPRO_09139	XP_031082430.1	-1.42707	0.00220989	0.011825	down
FPRO_04171	XP_031089031.1	-1.34175	0.00221448	0.0118431	down
FPRO_08387	XP_031087547.1	1.37261	0.00221748	0.0118527	up
FPRO_06219	XP_031079183.1	1.10302	0.00221913	0.0118551	up
FPRO_13399	XP_031088265.1	2.51825	0.00222846	0.0118985	up
FPRO_14288	XP_031085069.1	1.72784	0.00223108	0.011906	up
FPRO_03379	XP_031076954.1	1.44619	0.00223414	0.0119158	up
FPRO_13282	XP_031088149.1	-1.5341	0.00223761	0.0119279	down
FPRO_04165	XP_031089037.1	1.57457	0.00224361	0.0119533	up
FPRO_02220	XP_031078112.1	2.95169	0.0022457	0.011958	up
FPRO_05239	XP_031080932.1	-2.57396	0.0022542	0.0119967	down
FPRO_04362	XP_031080058.1	1.43193	0.00226583	0.0120521	up
FPRO_13562	XP_031088428.1	2.43152	0.00227163	0.0120764	up
FPRO_15360	XP_031085999.1	1.31445	0.00227669	0.0120968	up
FPRO_00821	XP_031075650.1	1.59381	0.00228634	0.0121415	up
FPRO_06123	XP_031079279.1	-1.3551	0.00228784	0.0121429	down
FPRO_09363	XP_031082653.1	1.40243	0.00230768	0.0122415	up
FPRO_03382	XP_031076951.1	-2.59139	0.00231721	0.0122855	down
FPRO_00572	XP_031075898.1	1.43102	0.00232348	0.0123103	up
FPRO_08579	XP_031087739.1	1.33131	0.00232545	0.0123103	up
FPRO_09310	XP_031082601.1	1.46065	0.00232565	0.0123103	up
FPRO_12050	XP_031087134.1	1.13481	0.00233127	0.0123334	up
FPRO_09654	XP_031082943.1	-1.25248	0.00233473	0.012345	down
FPRO_12615	XP_031088538.1	-2.54633	0.0023408	0.0123705	down
FPRO_11294	XP_031082296.1	2.36605	0.00234888	0.0124065	up
FPRO_08942	XP_031089820.1	-1.58746	0.00236206	0.0124694	down
FPRO_03899	XP_031089303.1	-1.77892	0.00236858	0.0124968	down
FPRO_00865	XP_031075607.1	1.91127	0.0023698	0.0124968	up
FPRO_09227	XP_031082518.1	-1.48889	0.0023753	0.0125191	down
FPRO_01693	XP_031074780.1	-2.68134	0.00237849	0.0125292	down
FPRO_04540	XP_031080236.1	-1.01548	0.00238391	0.012551	down
FPRO_03217	XP_031077116.1	-1.03491	0.00239056	0.0125704	down
FPRO_09056	XP_031089706.1	-1.20418	0.00239208	0.0125704	down
FPRO_18156		1.73119	0.00239235	0.0125704	up
FPRO_00855	XP_031075617.1	-1.10678	0.00239271	0.0125704	down
FPRO_05438	XP_031081131.1	-2.6374	0.00239405	0.0125707	down
FPRO_13198	XP_031088065.1	1.46127	0.00240458	0.0126192	up
FPRO_14247	XP_031085028.1	2.12403	0.00240732	0.0126239	up
FPRO_15376	XP_031085983.1	-1.60623	0.00240803	0.0126239	down
FPRO_12926	XP_031088849.1	-1.70838	0.00241156	0.0126352	down
FPRO_00772	XP_031075699.1	1.17244	0.00241278	0.0126352	up
FPRO_01265	XP_031075208.1	-1.12468	0.00242496	0.0126923	down
FPRO_08932	XP_031089829.1	-2.541	0.00244967	0.0128147	down
FPRO_09411	XP_031082701.1	1.2818	0.00246283	0.0128719	up
FPRO_00911	XP_031075561.1	-1.42545	0.00246322	0.0128719	down
FPRO_00802	XP_031075669.1	-1.12779	0.00247468	0.012925	down
FPRO_12008	XP_031087093.1	2.16975	0.00248563	0.0129655	up
FPRO_06109	XP_031079293.1	1.40616	0.00248571	0.0129655	up
FPRO_03320	XP_031077013.1	-1.42046	0.00248641	0.0129655	down
FPRO_11094	XP_031082097.1	-1.51742	0.00249143	0.0129803	down
FPRO_02586	XP_031077747.1	-1.27262	0.00249189	0.0129803	down
FPRO_08124	XP_031083551.1	-1.25585	0.00250949	0.0130651	down
FPRO_03603	XP_031076730.1	-1.38101	0.00251286	0.013071	down
FPRO_00524	XP_031075946.1	-1.90417	0.0025133	0.013071	down
FPRO_01691	XP_031074782.1	2.69743	0.00251956	0.0130966	up
FPRO_03464	XP_031076869.1	-1.1345	0.00253453	0.0131675	down
FPRO_04176	XP_031089026.1	-1.68108	0.00253617	0.013169	down
FPRO_13341	XP_031088207.1	1.83551	0.00255078	0.0132379	up
FPRO_07726	XP_031083948.1	1.9922	0.00256394	0.0132991	up
FPRO_06701	XP_031078701.1	2.4969	0.00257746	0.0133622	up
FPRO_03468	XP_031076865.1	1.10489	0.00258329	0.0133823	up
FPRO_03325	XP_031077008.1	2.38682	0.00258456	0.0133823	up
FPRO_13892	XP_031084674.1	-2.79462	0.00258542	0.0133823	down
FPRO_08231	XP_031087391.1	-1.57616	0.00258831	0.0133902	down
FPRO_11774	XP_031086860.1	1.85433	0.00260067	0.013447	up
FPRO_13460	XP_031088326.1	2.82833	0.00261095	0.0134931	up
FPRO_00577	XP_031075893.1	-1.2409	0.00262559	0.0135616	down
FPRO_14582	XP_031085364.1	1.81143	0.00262821	0.013568	up
FPRO_01930	XP_031074543.1	-1.50777	0.00263213	0.0135812	down
FPRO_12822	XP_031088745.1	-1.24711	0.00263966	0.0136128	down
FPRO_05305	XP_031080998.1	-1.69214	0.00264274	0.0136215	down
FPRO_06195	XP_031079207.1	-1.06844	0.00264651	0.0136338	down
FPRO_03404	XP_031076929.1	-1.66311	0.00265092	0.0136494	down
FPRO_08454	XP_031087614.1	1.20042	0.00265337	0.0136548	up
FPRO_14261	XP_031085042.1	-1.81771	0.00267586	0.0137552	down
FPRO_04513	XP_031080209.1	1.38208	0.00267589	0.0137552	up
FPRO_01222	XP_031075251.1	1.18046	0.00267707	0.0137552	up
FPRO_09271	XP_031082562.1	-1.31991	0.002682	0.0137733	down
FPRO_11678	XP_031086765.1	1.55435	0.0026846	0.0137794	up
FPRO_07452	XP_031084222.1	-1.93712	0.0026903	0.0138015	down
FPRO_05002	XP_031080696.1	-1.07286	0.00269612	0.0138233	down
FPRO_13801	XP_031084583.1	4.46508	0.00269736	0.0138233	up
FPRO_14968	XP_031086390.1	-2.66817	0.0027118	0.01389	down
FPRO_15504	XP_031085855.1	2.01219	0.00271553	0.0139019	up
FPRO_10777	XP_031081780.1	-1.30622	0.00271963	0.0139156	down
FPRO_03934	XP_031089268.1	-3.17978	0.00272436	0.0139326	down
FPRO_01185	XP_031075287.1	-2.04036	0.00274974	0.0140487	down
FPRO_00550	XP_031075920.1	-1.95134	0.00274992	0.0140487	down
FPRO_10460	XP_031081465.1	4.1088	0.00275462	0.0140653	up
FPRO_07989	XP_031083686.1	1.28409	0.00279177	0.0142476	up
FPRO_08523	XP_031087683.1	-1.48487	0.00279655	0.0142646	down
FPRO_09413	XP_031082703.1	1.187	0.00280256	0.0142871	up
FPRO_08156	XP_031083519.1	-1.46592	0.00280388	0.0142871	down
FPRO_09324	XP_031082615.1	1.50721	0.00280861	0.0143038	up
FPRO_08263	XP_031087423.1	-1.27058	0.00281839	0.0143462	down
FPRO_10067	XP_031083355.1	2.19787	0.00283165	0.0144011	up
FPRO_01517	XP_031074956.1	1.49706	0.00283212	0.0144011	up
FPRO_00421	XP_031076049.1	-1.17619	0.00283985	0.014433	down
FPRO_03150	XP_031077183.1	1.13703	0.00285387	0.0144967	up
FPRO_09823	XP_031083111.1	1.39276	0.00286017	0.0145212	up
FPRO_03069	XP_031077264.1	-1.24909	0.00287563	0.0145921	down
FPRO_03045	XP_031077288.1	1.22562	0.00287884	0.0146009	up
FPRO_01787	XP_031074686.1	1.41723	0.00288599	0.0146296	up
FPRO_12782	XP_031088705.1	1.6235	0.00289953	0.0146861	up
FPRO_08728	XP_031087888.1	-1.50722	0.00290012	0.0146861	down
FPRO_03427	XP_031076906.1	-1.2068	0.00290262	0.0146912	down
FPRO_13853	XP_031084635.1	1.80079	0.00290791	0.0147104	up
FPRO_10705	XP_031081708.1	-1.38352	0.00291607	0.014744	down
FPRO_09492	XP_031082782.1	1.55537	0.00291845	0.0147485	up
FPRO_08259	XP_031087419.1	-1.41659	0.00294422	0.0148711	down
FPRO_10971	XP_031081974.1	-2.39883	0.00294578	0.0148712	down
FPRO_01396	XP_031075077.1	-2.01489	0.0029594	0.0149323	down
FPRO_02449	XP_031077884.1	1.00026	0.00296226	0.0149352	up
FPRO_04310	XP_031080006.1	-1.8982	0.00296301	0.0149352	down
FPRO_03329	XP_031077004.1	-1.23243	0.00297454	0.0149856	down
FPRO_04826	XP_031080521.1	-1.56278	0.00300824	0.0151476	down
FPRO_12844	XP_031088767.1	-1.5178	0.00301875	0.0151928	down
FPRO_11927	XP_031087012.1	2.1165	0.00302231	0.0152029	up
FPRO_04771	XP_031080467.1	1.14521	0.00302972	0.0152276	up
FPRO_04618	XP_031080314.1	1.64945	0.00303117	0.0152276	up
FPRO_03683	XP_031076650.1	1.07291	0.00303187	0.0152276	up
FPRO_11888	XP_031086973.1	1.62277	0.0030445	0.0152832	up
FPRO_10910	XP_031081913.1	-1.7278	0.00304636	0.0152847	down
FPRO_12886	XP_031088809.1	-1.52614	0.00305003	0.0152953	down
FPRO_10024	XP_031083312.1	-1.31863	0.00305456	0.0153102	down
FPRO_10950	XP_031081953.1	-1.73062	0.00305629	0.0153111	down
FPRO_01239	XP_031075234.1	-1.16633	0.00306676	0.0153557	down
FPRO_00376	XP_031076094.1	1.19295	0.00307381	0.0153832	up
FPRO_01030	XP_031075442.1	1.56485	0.00307836	0.0153981	up
FPRO_11096	XP_031082099.1	-1.68731	0.00308311	0.0154106	down
FPRO_08444	XP_031087604.1	2.2559	0.003084	0.0154106	up
FPRO_09204	XP_031082495.1	-1.21255	0.00308773	0.0154214	down
FPRO_15536	XP_031085823.1	-2.10474	0.0030961	0.0154553	down
FPRO_13116	XP_031087983.1	-1.65445	0.00309805	0.0154572	down
FPRO_13836	XP_031084618.1	-2.09576	0.00310351	0.0154766	down
FPRO_01575	XP_031074898.1	-2.05042	0.00311653	0.0155336	down
FPRO_06439	XP_031078963.1	-1.95872	0.00311998	0.0155375	down
FPRO_13473	XP_031088339.1	1.5814	0.00312048	0.0155375	up
FPRO_03228	XP_031077105.1	0.996664	0.00312578	0.015556	ns
FPRO_04615	XP_031080311.1	-1.36442	0.00313599	0.0155989	down
FPRO_14305	XP_031085086.1	2.63722	0.00314441	0.0156329	up
FPRO_00511	XP_031075959.1	1.15232	0.0031482	0.0156438	up
FPRO_10408	XP_031081413.1	-1.15047	0.00315007	0.0156452	down
FPRO_07881	XP_031083794.1	1.27604	0.00317616	0.0157668	up
FPRO_11930	XP_031087015.1	-1.02677	0.00318297	0.0157926	down
FPRO_03684	XP_031076649.1	-1.47804	0.00319792	0.0158509	down
FPRO_11870	XP_031086956.1	-1.14341	0.00319794	0.0158509	down
FPRO_04736	XP_031080432.1	-1.40702	0.00320632	0.0158816	down
FPRO_00211	XP_031076259.1	2.62084	0.00320738	0.0158816	up
FPRO_00842	XP_031075630.1	-1.03203	0.00323309	0.0160009	down
FPRO_13835	XP_031084617.1	-2.25803	0.00323835	0.0160078	down
FPRO_00233	XP_031076237.1	1.30383	0.00323938	0.0160078	up
FPRO_03505	XP_031076828.1	-1.98784	0.00323938	0.0160078	down
FPRO_12816	XP_031088739.1	1.60565	0.00327849	0.0161855	up
FPRO_04791	XP_031080486.1	1.17816	0.00327863	0.0161855	up
FPRO_07570	XP_031084104.1	-1.60892	0.00328189	0.0161877	down
FPRO_05027	XP_031080721.1	1.16498	0.00328239	0.0161877	up
FPRO_11674	XP_031086761.1	-1.07941	0.00330921	0.0163118	down
FPRO_00195	XP_031076275.1	-1.10651	0.00331904	0.016352	down
FPRO_05633	XP_031079768.1	-1.9135	0.00334301	0.0164619	down
FPRO_13108	XP_031087975.1	-1.2551	0.00334803	0.0164774	down
FPRO_13448	XP_031088314.1	-1.55092	0.00335078	0.0164774	down
FPRO_04963	XP_031080657.1	1.56675	0.00335119	0.0164774	up
FPRO_15162	XP_031086196.1	1.18393	0.00336026	0.0165137	up
FPRO_02941	XP_031077392.1	-1.47388	0.00336281	0.016518	down
[truncated: 10,570 more rows]

## Sheet: RNA-seq_BCP_vs_CK_GOEnrich.all
ONTOLOGY	ID	Description	GeneRatio	BgRatio	pvalue	p.adjust	qvalue	geneID	Count
BP	GO:0044283	small molecule biosynthetic process	128/897	359/3903	7.26416e-09	1.44847e-05	1.32972e-05	FPRO_02384/FPRO_03657/FPRO_04421/FPRO_00664/FPRO_05777/FPRO_02842/FPRO_08391/FPRO_02568/FPRO_08475/FPRO_08120/FPRO_05057/FPRO_11021/FPRO_05699/FPRO_08103/FPRO_04151/FPRO_01466/FPRO_04381/FPRO_13202/FPRO_09307/FPRO_00235/FPRO_13205/FPRO_03366/FPRO_02532/FPRO_00592/FPRO_09723/FPRO_01513/FPRO_08458/FPRO_00812/FPRO_01395/FPRO_07787/FPRO_13436/FPRO_04342/FPRO_09072/FPRO_01899/FPRO_07727/FPRO_10963/FPR…	128
BP	GO:0019637	organophosphate metabolic process	120/897	336/3903	2.07568e-08	1.92636e-05	1.76843e-05	FPRO_02384/FPRO_05805/FPRO_00664/FPRO_05777/FPRO_00079/FPRO_01666/FPRO_08391/FPRO_13261/FPRO_08120/FPRO_05057/FPRO_05699/FPRO_06098/FPRO_08494/FPRO_04151/FPRO_15017/FPRO_10827/FPRO_03366/FPRO_02532/FPRO_00592/FPRO_01636/FPRO_09723/FPRO_10632/FPRO_01513/FPRO_13436/FPRO_06021/FPRO_01899/FPRO_04161/FPRO_06496/FPRO_12793/FPRO_07694/FPRO_03071/FPRO_10814/FPRO_05939/FPRO_06318/FPRO_01140/FPRO_00750/FPR…	120
BP	GO:0055086	nucleobase-containing small molecule metabolic process	90/897	234/3903	2.89823e-08	1.92636e-05	1.76843e-05	FPRO_02384/FPRO_01461/FPRO_00664/FPRO_05777/FPRO_00079/FPRO_08391/FPRO_13261/FPRO_08120/FPRO_09770/FPRO_05057/FPRO_11021/FPRO_05699/FPRO_04151/FPRO_03366/FPRO_02532/FPRO_00592/FPRO_01636/FPRO_09723/FPRO_10632/FPRO_01513/FPRO_07787/FPRO_13436/FPRO_01899/FPRO_04161/FPRO_00819/FPRO_12793/FPRO_03071/FPRO_05939/FPRO_06318/FPRO_01140/FPRO_00750/FPRO_05863/FPRO_03195/FPRO_06470/FPRO_04343/FPRO_13241/FPR…	90
BP	GO:0006629	lipid metabolic process	115/897	322/3903	4.28245e-08	2.1348e-05	1.95979e-05	FPRO_01104/FPRO_05805/FPRO_06323/FPRO_00664/FPRO_05777/FPRO_02842/FPRO_01666/FPRO_02568/FPRO_08475/FPRO_13459/FPRO_00589/FPRO_06098/FPRO_08494/FPRO_00503/FPRO_04381/FPRO_03149/FPRO_09700/FPRO_15017/FPRO_10827/FPRO_15512/FPRO_03366/FPRO_10632/FPRO_07922/FPRO_11833/FPRO_10650/FPRO_01395/FPRO_06021/FPRO_04342/FPRO_09072/FPRO_05122/FPRO_13293/FPRO_05179/FPRO_10022/FPRO_06496/FPRO_13037/FPRO_02896/FPR…	115
BP	GO:0008610	lipid biosynthetic process	81/897	207/3903	6.24796e-08	2.49169e-05	2.28741e-05	FPRO_05805/FPRO_06323/FPRO_00664/FPRO_05777/FPRO_02842/FPRO_01666/FPRO_02568/FPRO_08475/FPRO_13459/FPRO_00589/FPRO_06098/FPRO_08494/FPRO_04381/FPRO_15512/FPRO_03366/FPRO_10632/FPRO_07922/FPRO_01395/FPRO_06021/FPRO_04342/FPRO_09072/FPRO_13293/FPRO_05179/FPRO_10022/FPRO_06496/FPRO_13037/FPRO_02896/FPRO_07694/FPRO_11940/FPRO_06318/FPRO_10529/FPRO_10708/FPRO_04130/FPRO_06470/FPRO_00962/FPRO_03632/FPR…	81
BP	GO:0016125	sterol metabolic process	29/897	51/3903	1.55218e-07	3.73996e-05	3.43335e-05	FPRO_05805/FPRO_00664/FPRO_05777/FPRO_02842/FPRO_02568/FPRO_08475/FPRO_04381/FPRO_03366/FPRO_10650/FPRO_01395/FPRO_09072/FPRO_05179/FPRO_13037/FPRO_11940/FPRO_10529/FPRO_00962/FPRO_07968/FPRO_09611/FPRO_11205/FPRO_03278/FPRO_03521/FPRO_03163/FPRO_08179/FPRO_11747/FPRO_14263/FPRO_00746/FPRO_13305/FPRO_00437/FPRO_04778	29
BP	GO:0008202	steroid metabolic process	30/897	54/3903	1.91503e-07	3.73996e-05	3.43335e-05	FPRO_05805/FPRO_00664/FPRO_05777/FPRO_02842/FPRO_02568/FPRO_08475/FPRO_04381/FPRO_03366/FPRO_10650/FPRO_01395/FPRO_09072/FPRO_05179/FPRO_13037/FPRO_11940/FPRO_10529/FPRO_00962/FPRO_07968/FPRO_09611/FPRO_11205/FPRO_06269/FPRO_03278/FPRO_03521/FPRO_03163/FPRO_08179/FPRO_11747/FPRO_14263/FPRO_00746/FPRO_13305/FPRO_00437/FPRO_04778	30
BP	GO:0044255	cellular lipid metabolic process	108/897	305/3903	1.94965e-07	3.73996e-05	3.43335e-05	FPRO_01104/FPRO_05805/FPRO_06323/FPRO_05777/FPRO_02842/FPRO_01666/FPRO_02568/FPRO_08475/FPRO_13459/FPRO_00589/FPRO_06098/FPRO_08494/FPRO_00503/FPRO_04381/FPRO_03149/FPRO_15017/FPRO_10827/FPRO_15512/FPRO_03366/FPRO_10632/FPRO_07922/FPRO_11833/FPRO_01395/FPRO_06021/FPRO_04342/FPRO_09072/FPRO_05122/FPRO_13293/FPRO_05179/FPRO_10022/FPRO_06496/FPRO_13037/FPRO_02896/FPRO_07694/FPRO_00259/FPRO_09516/FPR…	108
BP	GO:0016126	sterol biosynthetic process	26/897	44/3903	2.42002e-07	3.73996e-05	3.43335e-05	FPRO_05805/FPRO_00664/FPRO_05777/FPRO_02842/FPRO_02568/FPRO_08475/FPRO_04381/FPRO_03366/FPRO_01395/FPRO_09072/FPRO_05179/FPRO_13037/FPRO_11940/FPRO_10529/FPRO_00962/FPRO_07968/FPRO_09611/FPRO_03278/FPRO_03521/FPRO_03163/FPRO_08179/FPRO_11747/FPRO_14263/FPRO_00746/FPRO_13305/FPRO_04778	26
BP	GO:0006696	ergosterol biosynthetic process	24/897	39/3903	2.43829e-07	3.73996e-05	3.43335e-05	FPRO_05777/FPRO_02842/FPRO_02568/FPRO_08475/FPRO_04381/FPRO_03366/FPRO_01395/FPRO_09072/FPRO_05179/FPRO_13037/FPRO_11940/FPRO_10529/FPRO_00962/FPRO_07968/FPRO_09611/FPRO_03278/FPRO_03521/FPRO_03163/FPRO_08179/FPRO_11747/FPRO_14263/FPRO_00746/FPRO_13305/FPRO_04778	24
BP	GO:0016129	phytosteroid biosynthetic process	24/897	39/3903	2.43829e-07	3.73996e-05	3.43335e-05	FPRO_05777/FPRO_02842/FPRO_02568/FPRO_08475/FPRO_04381/FPRO_03366/FPRO_01395/FPRO_09072/FPRO_05179/FPRO_13037/FPRO_11940/FPRO_10529/FPRO_00962/FPRO_07968/FPRO_09611/FPRO_03278/FPRO_03521/FPRO_03163/FPRO_08179/FPRO_11747/FPRO_14263/FPRO_00746/FPRO_13305/FPRO_04778	24
BP	GO:0044108	cellular alcohol biosynthetic process	24/897	39/3903	2.43829e-07	3.73996e-05	3.43335e-05	FPRO_05777/FPRO_02842/FPRO_02568/FPRO_08475/FPRO_04381/FPRO_03366/FPRO_01395/FPRO_09072/FPRO_05179/FPRO_13037/FPRO_11940/FPRO_10529/FPRO_00962/FPRO_07968/FPRO_09611/FPRO_03278/FPRO_03521/FPRO_03163/FPRO_08179/FPRO_11747/FPRO_14263/FPRO_00746/FPRO_13305/FPRO_04778	24
BP	GO:0097384	cellular lipid biosynthetic process	24/897	39/3903	2.43829e-07	3.73996e-05	3.43335e-05	FPRO_05777/FPRO_02842/FPRO_02568/FPRO_08475/FPRO_04381/FPRO_03366/FPRO_01395/FPRO_09072/FPRO_05179/FPRO_13037/FPRO_11940/FPRO_10529/FPRO_00962/FPRO_07968/FPRO_09611/FPRO_03278/FPRO_03521/FPRO_03163/FPRO_08179/FPRO_11747/FPRO_14263/FPRO_00746/FPRO_13305/FPRO_04778	24
BP	GO:0006694	steroid biosynthetic process	26/897	45/3903	4.49626e-07	5.97703e-05	5.48702e-05	FPRO_05805/FPRO_00664/FPRO_05777/FPRO_02842/FPRO_02568/FPRO_08475/FPRO_04381/FPRO_03366/FPRO_01395/FPRO_09072/FPRO_05179/FPRO_13037/FPRO_11940/FPRO_10529/FPRO_00962/FPRO_07968/FPRO_09611/FPRO_03278/FPRO_03521/FPRO_03163/FPRO_08179/FPRO_11747/FPRO_14263/FPRO_00746/FPRO_13305/FPRO_04778	26
BP	GO:0044107	cellular alcohol metabolic process	26/897	45/3903	4.49626e-07	5.97703e-05	5.48702e-05	FPRO_05777/FPRO_02842/FPRO_02568/FPRO_08475/FPRO_04381/FPRO_03366/FPRO_01395/FPRO_09072/FPRO_05179/FPRO_13037/FPRO_04924/FPRO_11940/FPRO_10529/FPRO_00962/FPRO_07968/FPRO_09611/FPRO_03278/FPRO_03521/FPRO_03163/FPRO_08179/FPRO_11747/FPRO_14263/FPRO_00746/FPRO_13305/FPRO_00437/FPRO_04778	26
BP	GO:0006753	nucleoside phosphate metabolic process	74/897	193/3903	6.25178e-07	7.07615e-05	6.49603e-05	FPRO_02384/FPRO_00664/FPRO_05777/FPRO_00079/FPRO_08391/FPRO_13261/FPRO_08120/FPRO_05057/FPRO_05699/FPRO_04151/FPRO_03366/FPRO_02532/FPRO_00592/FPRO_01636/FPRO_09723/FPRO_01513/FPRO_13436/FPRO_01899/FPRO_04161/FPRO_12793/FPRO_03071/FPRO_05939/FPRO_06318/FPRO_01140/FPRO_05863/FPRO_03195/FPRO_06470/FPRO_04343/FPRO_13241/FPRO_03103/FPRO_06340/FPRO_03469/FPRO_08211/FPRO_11056/FPRO_02677/FPRO_01468/FPR…	74
BP	GO:0008204	ergosterol metabolic process	25/897	43/3903	6.3877e-07	7.07615e-05	6.49603e-05	FPRO_05777/FPRO_02842/FPRO_02568/FPRO_08475/FPRO_04381/FPRO_03366/FPRO_01395/FPRO_09072/FPRO_05179/FPRO_13037/FPRO_11940/FPRO_10529/FPRO_00962/FPRO_07968/FPRO_09611/FPRO_03278/FPRO_03521/FPRO_03163/FPRO_08179/FPRO_11747/FPRO_14263/FPRO_00746/FPRO_13305/FPRO_00437/FPRO_04778	25
BP	GO:0016128	phytosteroid metabolic process	25/897	43/3903	6.3877e-07	7.07615e-05	6.49603e-05	FPRO_05777/FPRO_02842/FPRO_02568/FPRO_08475/FPRO_04381/FPRO_03366/FPRO_01395/FPRO_09072/FPRO_05179/FPRO_13037/FPRO_11940/FPRO_10529/FPRO_00962/FPRO_07968/FPRO_09611/FPRO_03278/FPRO_03521/FPRO_03163/FPRO_08179/FPRO_11747/FPRO_14263/FPRO_00746/FPRO_13305/FPRO_00437/FPRO_04778	25
BP	GO:1902653	secondary alcohol biosynthetic process	25/897	45/3903	2.04984e-06	0.000215125	0.000197489	FPRO_00664/FPRO_05777/FPRO_02842/FPRO_02568/FPRO_08475/FPRO_04381/FPRO_03366/FPRO_01395/FPRO_09072/FPRO_05179/FPRO_13037/FPRO_11940/FPRO_10529/FPRO_00962/FPRO_07968/FPRO_09611/FPRO_03278/FPRO_03521/FPRO_03163/FPRO_08179/FPRO_11747/FPRO_14263/FPRO_00746/FPRO_13305/FPRO_04778	25
BP	GO:0009117	nucleotide metabolic process	71/897	189/3903	2.59254e-06	0.000258476	0.000237285	FPRO_02384/FPRO_00664/FPRO_05777/FPRO_00079/FPRO_08391/FPRO_13261/FPRO_08120/FPRO_05057/FPRO_05699/FPRO_04151/FPRO_03366/FPRO_02532/FPRO_00592/FPRO_01636/FPRO_09723/FPRO_01513/FPRO_13436/FPRO_04161/FPRO_12793/FPRO_03071/FPRO_05939/FPRO_06318/FPRO_01140/FPRO_05863/FPRO_03195/FPRO_06470/FPRO_04343/FPRO_13241/FPRO_03103/FPRO_06340/FPRO_03469/FPRO_08211/FPRO_11056/FPRO_02677/FPRO_01468/FPRO_07698/FPR…	71
BP	GO:0009141	nucleoside triphosphate metabolic process	35/897	74/3903	3.04962e-06	0.000287348	0.000263791	FPRO_05057/FPRO_05699/FPRO_04151/FPRO_00592/FPRO_13436/FPRO_05939/FPRO_05863/FPRO_03195/FPRO_06470/FPRO_04343/FPRO_06340/FPRO_08211/FPRO_11056/FPRO_01468/FPRO_07698/FPRO_07711/FPRO_05844/FPRO_09441/FPRO_09769/FPRO_08384/FPRO_06109/FPRO_08162/FPRO_04205/FPRO_04719/FPRO_10853/FPRO_13262/FPRO_03165/FPRO_09417/FPRO_04760/FPRO_06193/FPRO_01063/FPRO_03223/FPRO_01540/FPRO_10872/FPRO_00754	35
BP	GO:0006066	alcohol metabolic process	48/897	114/3903	3.17034e-06	0.000287348	0.000263791	FPRO_02384/FPRO_03657/FPRO_00664/FPRO_05777/FPRO_02842/FPRO_02568/FPRO_08475/FPRO_05057/FPRO_08103/FPRO_04381/FPRO_14272/FPRO_00235/FPRO_03366/FPRO_01513/FPRO_01395/FPRO_09072/FPRO_05179/FPRO_13037/FPRO_04924/FPRO_11940/FPRO_05186/FPRO_10529/FPRO_02456/FPRO_00962/FPRO_07968/FPRO_11949/FPRO_09611/FPRO_06340/FPRO_11056/FPRO_03278/FPRO_03361/FPRO_03521/FPRO_03163/FPRO_08179/FPRO_11747/FPRO_03679/FPR…	48
BP	GO:1901135	carbohydrate derivative metabolic process	108/897	324/3903	5.67213e-06	0.000491749	0.000451434	FPRO_02384/FPRO_00841/FPRO_01461/FPRO_00664/FPRO_05777/FPRO_04742/FPRO_00079/FPRO_08391/FPRO_02236/FPRO_09770/FPRO_13459/FPRO_05057/FPRO_10545/FPRO_05699/FPRO_06098/FPRO_08494/FPRO_04151/FPRO_03366/FPRO_00592/FPRO_01636/FPRO_09723/FPRO_10632/FPRO_10650/FPRO_13436/FPRO_06021/FPRO_01899/FPRO_15254/FPRO_04161/FPRO_14055/FPRO_00819/FPRO_12793/FPRO_11293/FPRO_00259/FPRO_08456/FPRO_05939/FPRO_01140/FPR…	108
BP	GO:0046165	alcohol biosynthetic process	36/897	79/3903	6.48906e-06	0.000539132	0.000494933	FPRO_02384/FPRO_03657/FPRO_00664/FPRO_05777/FPRO_02842/FPRO_02568/FPRO_08475/FPRO_08103/FPRO_04381/FPRO_00235/FPRO_03366/FPRO_01395/FPRO_09072/FPRO_05179/FPRO_13037/FPRO_11940/FPRO_10529/FPRO_02456/FPRO_00962/FPRO_07968/FPRO_09611/FPRO_06340/FPRO_11056/FPRO_03278/FPRO_03521/FPRO_03163/FPRO_08179/FPRO_11747/FPRO_04545/FPRO_07626/FPRO_14263/FPRO_00746/FPRO_03317/FPRO_13305/FPRO_04971/FPRO_04778	36
BP	GO:0009161	ribonucleoside monophosphate metabolic process	36/897	80/3903	9.24664e-06	0.000737512	0.000677049	FPRO_05057/FPRO_05699/FPRO_04151/FPRO_00592/FPRO_01636/FPRO_13436/FPRO_05939/FPRO_03195/FPRO_04343/FPRO_06340/FPRO_08211/FPRO_11056/FPRO_02677/FPRO_01468/FPRO_07698/FPRO_09619/FPRO_07588/FPRO_07711/FPRO_00990/FPRO_05844/FPRO_09769/FPRO_08384/FPRO_08387/FPRO_02298/FPRO_08162/FPRO_04719/FPRO_13262/FPRO_03165/FPRO_09417/FPRO_04760/FPRO_06193/FPRO_01063/FPRO_03223/FPRO_01540/FPRO_10872/FPRO_00754	36
BP	GO:0019693	ribose phosphate metabolic process	54/897	138/3903	1.09353e-05	0.000838656	0.0007699	FPRO_00664/FPRO_05777/FPRO_00079/FPRO_08391/FPRO_05057/FPRO_05699/FPRO_04151/FPRO_03366/FPRO_00592/FPRO_01636/FPRO_09723/FPRO_13436/FPRO_01899/FPRO_04161/FPRO_12793/FPRO_05939/FPRO_01140/FPRO_05863/FPRO_03195/FPRO_06470/FPRO_04343/FPRO_06340/FPRO_08211/FPRO_11056/FPRO_02677/FPRO_01468/FPRO_07698/FPRO_09619/FPRO_03521/FPRO_07588/FPRO_07963/FPRO_07711/FPRO_00990/FPRO_05844/FPRO_09769/FPRO_08384/FPR…	54
BP	GO:1902652	secondary alcohol metabolic process	26/897	52/3903	1.67597e-05	0.00123773	0.00113626	FPRO_00664/FPRO_05777/FPRO_02842/FPRO_02568/FPRO_08475/FPRO_04381/FPRO_03366/FPRO_01395/FPRO_09072/FPRO_05179/FPRO_13037/FPRO_11940/FPRO_10529/FPRO_00962/FPRO_07968/FPRO_09611/FPRO_03278/FPRO_03521/FPRO_03163/FPRO_08179/FPRO_11747/FPRO_14263/FPRO_00746/FPRO_13305/FPRO_00437/FPRO_04778	26
BP	GO:0009199	ribonucleoside triphosphate metabolic process	31/897	67/3903	1.96019e-05	0.00139593	0.00128149	FPRO_05057/FPRO_05699/FPRO_04151/FPRO_00592/FPRO_13436/FPRO_05939/FPRO_05863/FPRO_03195/FPRO_06470/FPRO_04343/FPRO_06340/FPRO_08211/FPRO_11056/FPRO_01468/FPRO_07698/FPRO_07711/FPRO_05844/FPRO_09769/FPRO_08384/FPRO_08162/FPRO_04719/FPRO_13262/FPRO_03165/FPRO_09417/FPRO_04760/FPRO_06193/FPRO_01063/FPRO_03223/FPRO_01540/FPRO_10872/FPRO_00754	31
BP	GO:1901617	organic hydroxy compound biosynthetic process	39/897	92/3903	2.22536e-05	0.00153013	0.00140468	FPRO_02384/FPRO_05805/FPRO_03657/FPRO_00664/FPRO_05777/FPRO_02842/FPRO_08391/FPRO_02568/FPRO_08475/FPRO_08103/FPRO_04381/FPRO_00235/FPRO_03366/FPRO_01395/FPRO_09072/FPRO_05179/FPRO_13037/FPRO_11940/FPRO_10529/FPRO_02456/FPRO_00962/FPRO_07968/FPRO_09611/FPRO_06340/FPRO_11056/FPRO_03278/FPRO_03521/FPRO_03163/FPRO_08179/FPRO_11747/FPRO_04545/FPRO_07626/FPRO_14263/FPRO_00746/FPRO_03317/FPRO_13305/FPR…	39
BP	GO:0090407	organophosphate biosynthetic process	79/897	228/3903	2.44539e-05	0.00162537	0.00149212	FPRO_05805/FPRO_00664/FPRO_05777/FPRO_00079/FPRO_01666/FPRO_13261/FPRO_08120/FPRO_05057/FPRO_05699/FPRO_04151/FPRO_03366/FPRO_00592/FPRO_01636/FPRO_10632/FPRO_13436/FPRO_06021/FPRO_04161/FPRO_06496/FPRO_12793/FPRO_07694/FPRO_03071/FPRO_05939/FPRO_06318/FPRO_05863/FPRO_10708/FPRO_04130/FPRO_02456/FPRO_03195/FPRO_06470/FPRO_03632/FPRO_03103/FPRO_06394/FPRO_08211/FPRO_03064/FPRO_02677/FPRO_06094/FPR…	79
BP	GO:0046496	nicotinamide nucleotide metabolic process	28/897	59/3903	2.7696e-05	0.00176069	0.00161635	FPRO_02384/FPRO_00664/FPRO_08391/FPRO_13261/FPRO_05057/FPRO_05699/FPRO_04151/FPRO_00592/FPRO_09723/FPRO_01513/FPRO_13436/FPRO_01140/FPRO_03195/FPRO_13241/FPRO_03103/FPRO_06340/FPRO_08211/FPRO_11056/FPRO_07963/FPRO_09769/FPRO_04442/FPRO_04555/FPRO_00921/FPRO_13262/FPRO_06193/FPRO_00890/FPRO_14473/FPRO_11681	28
BP	GO:0009144	purine nucleoside triphosphate metabolic process	31/897	68/3903	2.82558e-05	0.00176069	0.00161635	FPRO_05057/FPRO_05699/FPRO_04151/FPRO_00592/FPRO_13436/FPRO_05939/FPRO_03195/FPRO_04343/FPRO_06340/FPRO_08211/FPRO_11056/FPRO_01468/FPRO_07698/FPRO_07711/FPRO_05844/FPRO_09769/FPRO_08384/FPRO_08162/FPRO_04205/FPRO_04719/FPRO_10853/FPRO_13262/FPRO_03165/FPRO_09417/FPRO_04760/FPRO_06193/FPRO_01063/FPRO_03223/FPRO_01540/FPRO_10872/FPRO_00754	31
CC	GO:0005886	plasma membrane	132/866	412/3758	5.62663e-06	0.00199183	0.00184198	FPRO_00223/FPRO_11978/FPRO_14009/FPRO_14174/FPRO_05805/FPRO_00523/FPRO_09689/FPRO_00664/FPRO_02842/FPRO_02568/FPRO_02236/FPRO_15682/FPRO_15412/FPRO_08499/FPRO_13459/FPRO_09226/FPRO_11655/FPRO_05057/FPRO_11021/FPRO_08071/FPRO_04251/FPRO_05699/FPRO_01028/FPRO_07088/FPRO_08188/FPRO_04151/FPRO_05082/FPRO_15017/FPRO_06531/FPRO_09879/FPRO_05007/FPRO_01002/FPRO_00592/FPRO_08673/FPRO_12998/FPRO_14081/FPR…	132
BP	GO:0009123	nucleoside monophosphate metabolic process	37/897	87/3903	3.31255e-05	0.00200159	0.00183749	FPRO_05057/FPRO_05699/FPRO_04151/FPRO_00592/FPRO_01636/FPRO_13436/FPRO_05939/FPRO_03195/FPRO_04343/FPRO_06340/FPRO_08211/FPRO_11056/FPRO_02677/FPRO_01468/FPRO_07698/FPRO_09619/FPRO_07588/FPRO_07711/FPRO_00990/FPRO_05844/FPRO_09769/FPRO_08384/FPRO_07742/FPRO_08387/FPRO_02298/FPRO_08162/FPRO_04719/FPRO_13262/FPRO_03165/FPRO_09417/FPRO_04760/FPRO_06193/FPRO_01063/FPRO_03223/FPRO_01540/FPRO_10872/FPR…	37
BP	GO:0009126	purine nucleoside monophosphate metabolic process	32/897	72/3903	3.94772e-05	0.00224907	0.00206469	FPRO_05057/FPRO_05699/FPRO_04151/FPRO_00592/FPRO_01636/FPRO_13436/FPRO_05939/FPRO_03195/FPRO_04343/FPRO_06340/FPRO_08211/FPRO_11056/FPRO_01468/FPRO_07698/FPRO_07711/FPRO_00990/FPRO_05844/FPRO_09769/FPRO_08384/FPRO_02298/FPRO_08162/FPRO_04719/FPRO_13262/FPRO_03165/FPRO_09417/FPRO_04760/FPRO_06193/FPRO_01063/FPRO_03223/FPRO_01540/FPRO_10872/FPRO_00754	32
BP	GO:0009167	purine ribonucleoside monophosphate metabolic process	32/897	72/3903	3.94772e-05	0.00224907	0.00206469	FPRO_05057/FPRO_05699/FPRO_04151/FPRO_00592/FPRO_01636/FPRO_13436/FPRO_05939/FPRO_03195/FPRO_04343/FPRO_06340/FPRO_08211/FPRO_11056/FPRO_01468/FPRO_07698/FPRO_07711/FPRO_00990/FPRO_05844/FPRO_09769/FPRO_08384/FPRO_02298/FPRO_08162/FPRO_04719/FPRO_13262/FPRO_03165/FPRO_09417/FPRO_04760/FPRO_06193/FPRO_01063/FPRO_03223/FPRO_01540/FPRO_10872/FPRO_00754	32
BP	GO:0019362	pyridine nucleotide metabolic process	28/897	61/3903	5.91308e-05	0.00327519	0.00300668	FPRO_02384/FPRO_00664/FPRO_08391/FPRO_13261/FPRO_05057/FPRO_05699/FPRO_04151/FPRO_00592/FPRO_09723/FPRO_01513/FPRO_13436/FPRO_01140/FPRO_03195/FPRO_13241/FPRO_03103/FPRO_06340/FPRO_08211/FPRO_11056/FPRO_07963/FPRO_09769/FPRO_04442/FPRO_04555/FPRO_00921/FPRO_13262/FPRO_06193/FPRO_00890/FPRO_14473/FPRO_11681	28
BP	GO:0009259	ribonucleotide metabolic process	48/897	126/3903	7.57781e-05	0.00408382	0.00374902	FPRO_05777/FPRO_00079/FPRO_05057/FPRO_05699/FPRO_04151/FPRO_03366/FPRO_00592/FPRO_01636/FPRO_13436/FPRO_04161/FPRO_12793/FPRO_05939/FPRO_05863/FPRO_03195/FPRO_06470/FPRO_04343/FPRO_06340/FPRO_08211/FPRO_11056/FPRO_02677/FPRO_01468/FPRO_07698/FPRO_09619/FPRO_03521/FPRO_07588/FPRO_07711/FPRO_00990/FPRO_05844/FPRO_09769/FPRO_08384/FPRO_08387/FPRO_06109/FPRO_02298/FPRO_08162/FPRO_04719/FPRO_09437/FPR…	48
BP	GO:1901615	organic hydroxy compound metabolic process	55/897	150/3903	7.90837e-05	0.00414981	0.0038096	FPRO_02384/FPRO_05805/FPRO_03657/FPRO_00664/FPRO_05777/FPRO_02842/FPRO_08391/FPRO_02568/FPRO_08475/FPRO_05057/FPRO_08103/FPRO_04381/FPRO_14272/FPRO_00235/FPRO_03366/FPRO_01513/FPRO_10650/FPRO_01395/FPRO_09072/FPRO_05179/FPRO_13037/FPRO_04924/FPRO_11940/FPRO_05186/FPRO_10529/FPRO_02456/FPRO_00962/FPRO_07968/FPRO_11949/FPRO_09611/FPRO_06340/FPRO_11056/FPRO_11205/FPRO_03278/FPRO_03361/FPRO_03521/FPR…	55
BP	GO:0009205	purine ribonucleoside triphosphate metabolic process	29/897	65/3903	8.32331e-05	0.00421938	0.00387346	FPRO_05057/FPRO_05699/FPRO_04151/FPRO_00592/FPRO_13436/FPRO_05939/FPRO_03195/FPRO_04343/FPRO_06340/FPRO_08211/FPRO_11056/FPRO_01468/FPRO_07698/FPRO_07711/FPRO_05844/FPRO_09769/FPRO_08384/FPRO_08162/FPRO_04719/FPRO_13262/FPRO_03165/FPRO_09417/FPRO_04760/FPRO_06193/FPRO_01063/FPRO_03223/FPRO_01540/FPRO_10872/FPRO_00754	29
BP	GO:0046034	ATP metabolic process	28/897	62/3903	8.46415e-05	0.00421938	0.00387346	FPRO_05057/FPRO_05699/FPRO_04151/FPRO_00592/FPRO_13436/FPRO_05939/FPRO_03195/FPRO_04343/FPRO_06340/FPRO_08211/FPRO_11056/FPRO_01468/FPRO_07698/FPRO_07711/FPRO_09769/FPRO_08384/FPRO_08162/FPRO_04719/FPRO_13262/FPRO_03165/FPRO_09417/FPRO_04760/FPRO_06193/FPRO_01063/FPRO_03223/FPRO_01540/FPRO_10872/FPRO_00754	28
BP	GO:0009132	nucleoside diphosphate metabolic process	17/897	31/3903	0.000114966	0.00559127	0.00513289	FPRO_05057/FPRO_05699/FPRO_04151/FPRO_00592/FPRO_13436/FPRO_01899/FPRO_05863/FPRO_03195/FPRO_06340/FPRO_08211/FPRO_11056/FPRO_05844/FPRO_09769/FPRO_06109/FPRO_10853/FPRO_13262/FPRO_06193	17
BP	GO:0009165	nucleotide biosynthetic process	42/897	108/3903	0.000123713	0.00587342	0.0053919	FPRO_00079/FPRO_13261/FPRO_08120/FPRO_05057/FPRO_05699/FPRO_04151/FPRO_00592/FPRO_01636/FPRO_13436/FPRO_04161/FPRO_12793/FPRO_03071/FPRO_05939/FPRO_06318/FPRO_05863/FPRO_03195/FPRO_06470/FPRO_03103/FPRO_08211/FPRO_02677/FPRO_06094/FPRO_09619/FPRO_07588/FPRO_00990/FPRO_05844/FPRO_09769/FPRO_08384/FPRO_04442/FPRO_07742/FPRO_08387/FPRO_06109/FPRO_02298/FPRO_04555/FPRO_10853/FPRO_00921/FPRO_09417/FPR…	42
BP	GO:0006734	NADH metabolic process	13/897	21/3903	0.00014386	0.00667108	0.00612417	FPRO_02384/FPRO_05057/FPRO_05699/FPRO_04151/FPRO_00592/FPRO_13436/FPRO_03195/FPRO_08211/FPRO_11056/FPRO_09769/FPRO_13262/FPRO_06193/FPRO_14473	13
BP	GO:1901293	nucleoside phosphate biosynthetic process	42/897	109/3903	0.000157727	0.0071479	0.0065619	FPRO_00079/FPRO_13261/FPRO_08120/FPRO_05057/FPRO_05699/FPRO_04151/FPRO_00592/FPRO_01636/FPRO_13436/FPRO_04161/FPRO_12793/FPRO_03071/FPRO_05939/FPRO_06318/FPRO_05863/FPRO_03195/FPRO_06470/FPRO_03103/FPRO_08211/FPRO_02677/FPRO_06094/FPRO_09619/FPRO_07588/FPRO_00990/FPRO_05844/FPRO_09769/FPRO_08384/FPRO_04442/FPRO_07742/FPRO_08387/FPRO_06109/FPRO_02298/FPRO_04555/FPRO_10853/FPRO_00921/FPRO_09417/FPR…	42
BP	GO:0009185	ribonucleoside diphosphate metabolic process	16/897	29/3903	0.000166593	0.00732308	0.00672271	FPRO_05057/FPRO_05699/FPRO_04151/FPRO_00592/FPRO_13436/FPRO_01899/FPRO_03195/FPRO_06340/FPRO_08211/FPRO_11056/FPRO_05844/FPRO_09769/FPRO_06109/FPRO_10853/FPRO_13262/FPRO_06193	16
BP	GO:0006007	glucose catabolic process	9/897	12/3903	0.000191873	0.00732308	0.00672271	FPRO_05057/FPRO_05699/FPRO_04151/FPRO_00592/FPRO_13436/FPRO_03195/FPRO_08211/FPRO_09769/FPRO_06193	9
BP	GO:0006735	NADH regeneration	9/897	12/3903	0.000191873	0.00732308	0.00672271	FPRO_05057/FPRO_05699/FPRO_04151/FPRO_00592/FPRO_13436/FPRO_03195/FPRO_08211/FPRO_09769/FPRO_06193	9
BP	GO:0031349	positive regulation of defense response	9/897	12/3903	0.000191873	0.00732308	0.00672271	FPRO_06401/FPRO_05057/FPRO_11021/FPRO_05045/FPRO_04151/FPRO_09700/FPRO_00592/FPRO_08211/FPRO_01372	9
BP	GO:0061615	glycolytic process through fructose-6-phosphate	9/897	12/3903	0.000191873	0.00732308	0.00672271	FPRO_05057/FPRO_05699/FPRO_04151/FPRO_00592/FPRO_13436/FPRO_03195/FPRO_08211/FPRO_09769/FPRO_06193	9
BP	GO:0061620	glycolytic process through glucose-6-phosphate	9/897	12/3903	0.000191873	0.00732308	0.00672271	FPRO_05057/FPRO_05699/FPRO_04151/FPRO_00592/FPRO_13436/FPRO_03195/FPRO_08211/FPRO_09769/FPRO_06193	9
BP	GO:0061621	canonical glycolysis	9/897	12/3903	0.000191873	0.00732308	0.00672271	FPRO_05057/FPRO_05699/FPRO_04151/FPRO_00592/FPRO_13436/FPRO_03195/FPRO_08211/FPRO_09769/FPRO_06193	9
BP	GO:0061718	glucose catabolic process to pyruvate	9/897	12/3903	0.000191873	0.00732308	0.00672271	FPRO_05057/FPRO_05699/FPRO_04151/FPRO_00592/FPRO_13436/FPRO_03195/FPRO_08211/FPRO_09769/FPRO_06193	9
BP	GO:0019320	hexose catabolic process	14/897	24/3903	0.000194645	0.00732308	0.00672271	FPRO_05057/FPRO_10545/FPRO_05699/FPRO_04151/FPRO_00592/FPRO_13436/FPRO_09930/FPRO_03195/FPRO_08211/FPRO_09769/FPRO_10572/FPRO_06193/FPRO_07997/FPRO_13312	14
BP	GO:1901137	carbohydrate derivative biosynthetic process	71/897	212/3903	0.000215115	0.00794331	0.0072921	FPRO_01461/FPRO_00664/FPRO_04742/FPRO_00079/FPRO_09770/FPRO_13459/FPRO_05057/FPRO_10545/FPRO_05699/FPRO_04151/FPRO_00592/FPRO_01636/FPRO_10650/FPRO_13436/FPRO_06021/FPRO_15254/FPRO_04161/FPRO_00819/FPRO_12793/FPRO_11293/FPRO_00259/FPRO_08456/FPRO_05939/FPRO_00750/FPRO_12967/FPRO_05863/FPRO_10708/FPRO_04130/FPRO_03195/FPRO_06470/FPRO_15322/FPRO_03632/FPRO_07677/FPRO_08211/FPRO_03064/FPRO_02666/FPR…	71
BP	GO:0072524	pyridine-containing compound metabolic process	29/897	68/3903	0.000220774	0.00800405	0.00734785	FPRO_02384/FPRO_00664/FPRO_08391/FPRO_13261/FPRO_05057/FPRO_05699/FPRO_04151/FPRO_00592/FPRO_09723/FPRO_01513/FPRO_13436/FPRO_01140/FPRO_03195/FPRO_13241/FPRO_03103/FPRO_06340/FPRO_08211/FPRO_11056/FPRO_07963/FPRO_09769/FPRO_04442/FPRO_04555/FPRO_00921/FPRO_13262/FPRO_06193/FPRO_00890/FPRO_14473/FPRO_02993/FPRO_11681	29
BP	GO:0009142	nucleoside triphosphate biosynthetic process	20/897	41/3903	0.000245268	0.00873331	0.00801733	FPRO_05057/FPRO_05699/FPRO_04151/FPRO_00592/FPRO_13436/FPRO_05939/FPRO_05863/FPRO_03195/FPRO_06470/FPRO_08211/FPRO_05844/FPRO_09769/FPRO_08384/FPRO_06109/FPRO_10853/FPRO_09417/FPRO_04760/FPRO_06193/FPRO_01063/FPRO_03223	20
BP	GO:0016051	carbohydrate biosynthetic process	36/897	91/3903	0.000251477	0.00879729	0.00807606	FPRO_02384/FPRO_00664/FPRO_08120/FPRO_05057/FPRO_05699/FPRO_08103/FPRO_00592/FPRO_09723/FPRO_05941/FPRO_13436/FPRO_15254/FPRO_00819/FPRO_02362/FPRO_00750/FPRO_15322/FPRO_13332/FPRO_04819/FPRO_14612/FPRO_07677/FPRO_08211/FPRO_05864/FPRO_08143/FPRO_04538/FPRO_13059/FPRO_03182/FPRO_03679/FPRO_04545/FPRO_13383/FPRO_10709/FPRO_08257/FPRO_00574/FPRO_07915/FPRO_06193/FPRO_00670/FPRO_11848/FPRO_01101	36
CC	GO:0005783	endoplasmic reticulum	141/866	463/3758	5.16145e-05	0.00913577	0.00844849	FPRO_11978/FPRO_06401/FPRO_06323/FPRO_04742/FPRO_02842/FPRO_02568/FPRO_08475/FPRO_15682/FPRO_03170/FPRO_15412/FPRO_08499/FPRO_00589/FPRO_08071/FPRO_06098/FPRO_08494/FPRO_05865/FPRO_07088/FPRO_08188/FPRO_04381/FPRO_15017/FPRO_06856/FPRO_01002/FPRO_03366/FPRO_10727/FPRO_04054/FPRO_15453/FPRO_04841/FPRO_10589/FPRO_06021/FPRO_09620/FPRO_04342/FPRO_09072/FPRO_01740/FPRO_13293/FPRO_05179/FPRO_06496/FPR…	141
BP	GO:0006644	phospholipid metabolic process	48/897	134/3903	0.000422264	0.0145172	0.013327	FPRO_05805/FPRO_05777/FPRO_01666/FPRO_06098/FPRO_08494/FPRO_15017/FPRO_10827/FPRO_03366/FPRO_10632/FPRO_06021/FPRO_06496/FPRO_07694/FPRO_10814/FPRO_06318/FPRO_10708/FPRO_04130/FPRO_06470/FPRO_03632/FPRO_06394/FPRO_10509/FPRO_03064/FPRO_05823/FPRO_03278/FPRO_03361/FPRO_06094/FPRO_03521/FPRO_04857/FPRO_11832/FPRO_05125/FPRO_10381/FPRO_11871/FPRO_04545/FPRO_08124/FPRO_07945/FPRO_01758/FPRO_11988/FPR…	48
CC	GO:0030312	external encapsulating structure	39/866	98/3758	0.000127148	0.0150035	0.0138748	FPRO_11978/FPRO_06401/FPRO_02236/FPRO_05057/FPRO_09483/FPRO_11021/FPRO_05699/FPRO_01028/FPRO_08103/FPRO_13463/FPRO_04151/FPRO_15017/FPRO_06856/FPRO_10238/FPRO_01002/FPRO_00592/FPRO_01636/FPRO_10632/FPRO_15453/FPRO_08495/FPRO_07932/FPRO_01309/FPRO_09542/FPRO_08211/FPRO_11056/FPRO_01372/FPRO_03074/FPRO_08147/FPRO_04560/FPRO_09394/FPRO_09310/FPRO_06108/FPRO_11680/FPRO_15066/FPRO_09277/FPRO_05233/FPR…	39
BP	GO:0046365	monosaccharide catabolic process	16/897	31/3903	0.000459559	0.0155315	0.0142582	FPRO_05057/FPRO_10545/FPRO_05699/FPRO_04151/FPRO_00592/FPRO_13436/FPRO_01140/FPRO_09930/FPRO_03195/FPRO_08211/FPRO_09769/FPRO_10572/FPRO_06193/FPRO_06991/FPRO_07997/FPRO_13312	16
BP	GO:0016053	organic acid biosynthetic process	66/897	199/3903	0.000488908	0.0157164	0.0144279	FPRO_04421/FPRO_05057/FPRO_11021/FPRO_05699/FPRO_04151/FPRO_01466/FPRO_13202/FPRO_09307/FPRO_13205/FPRO_00592/FPRO_01513/FPRO_08458/FPRO_00812/FPRO_07787/FPRO_13436/FPRO_04342/FPRO_07727/FPRO_10963/FPRO_04208/FPRO_10599/FPRO_08109/FPRO_02896/FPRO_03098/FPRO_09489/FPRO_06590/FPRO_08393/FPRO_03195/FPRO_16165/FPRO_06394/FPRO_00732/FPRO_01751/FPRO_08211/FPRO_11699/FPRO_04980/FPRO_04917/FPRO_09456/FPR…	66
BP	GO:0046394	carboxylic acid biosynthetic process	66/897	199/3903	0.000488908	0.0157164	0.0144279	FPRO_04421/FPRO_05057/FPRO_11021/FPRO_05699/FPRO_04151/FPRO_01466/FPRO_13202/FPRO_09307/FPRO_13205/FPRO_00592/FPRO_01513/FPRO_08458/FPRO_00812/FPRO_07787/FPRO_13436/FPRO_04342/FPRO_07727/FPRO_10963/FPRO_04208/FPRO_10599/FPRO_08109/FPRO_02896/FPRO_03098/FPRO_09489/FPRO_06590/FPRO_08393/FPRO_03195/FPRO_16165/FPRO_06394/FPRO_00732/FPRO_01751/FPRO_08211/FPRO_11699/FPRO_04980/FPRO_04917/FPRO_09456/FPR…	66
BP	GO:0044003	modulation by symbiont of host process	9/897	13/3903	0.000496556	0.0157164	0.0144279	FPRO_06401/FPRO_05057/FPRO_11021/FPRO_05045/FPRO_13463/FPRO_04151/FPRO_00592/FPRO_08211/FPRO_01372	9
BP	GO:0052031	modulation by symbiont of host defense response	9/897	13/3903	0.000496556	0.0157164	0.0144279	FPRO_06401/FPRO_05057/FPRO_11021/FPRO_05045/FPRO_13463/FPRO_04151/FPRO_00592/FPRO_08211/FPRO_01372	9
BP	GO:0009201	ribonucleoside triphosphate biosynthetic process	18/897	37/3903	0.000521531	0.016249	0.0149168	FPRO_05057/FPRO_05699/FPRO_04151/FPRO_00592/FPRO_13436/FPRO_05939/FPRO_05863/FPRO_03195/FPRO_06470/FPRO_08211/FPRO_05844/FPRO_09769/FPRO_08384/FPRO_09417/FPRO_04760/FPRO_06193/FPRO_01063/FPRO_03223	18
BP	GO:0042149	cellular response to glucose starvation	11/897	18/3903	0.000562473	0.0172549	0.0158403	FPRO_06401/FPRO_15412/FPRO_09700/FPRO_04054/FPRO_03676/FPRO_10022/FPRO_10387/FPRO_08143/FPRO_06403/FPRO_04271/FPRO_13265	11
BP	GO:0006091	generation of precursor metabolites and energy	59/897	175/3903	0.000606769	0.0183318	0.0168289	FPRO_00523/FPRO_00664/FPRO_00079/FPRO_08391/FPRO_05057/FPRO_05699/FPRO_04151/FPRO_00592/FPRO_09723/FPRO_01513/FPRO_13436/FPRO_06100/FPRO_05186/FPRO_01140/FPRO_09542/FPRO_03195/FPRO_04343/FPRO_04819/FPRO_09611/FPRO_06340/FPRO_03469/FPRO_08211/FPRO_11056/FPRO_04330/FPRO_10537/FPRO_03064/FPRO_08408/FPRO_03336/FPRO_01468/FPRO_07698/FPRO_02640/FPRO_07963/FPRO_04538/FPRO_13059/FPRO_07711/FPRO_00990/FPR…	59
BP	GO:0044416	induction by symbiont of host defense response	8/897	11/3903	0.000636388	0.0189397	0.0173869	FPRO_06401/FPRO_05057/FPRO_11021/FPRO_05045/FPRO_04151/FPRO_00592/FPRO_08211/FPRO_01372	8
BP	GO:0072527	pyrimidine-containing compound metabolic process	20/897	44/3903	0.000784141	0.0225912	0.0207391	FPRO_03657/FPRO_08120/FPRO_00235/FPRO_02532/FPRO_03071/FPRO_06318/FPRO_05863/FPRO_06470/FPRO_00732/FPRO_15170/FPRO_02677/FPRO_06094/FPRO_07742/FPRO_08387/FPRO_06109/FPRO_10853/FPRO_00921/FPRO_02992/FPRO_11031/FPRO_04971	20
BP	GO:0031347	regulation of defense response	10/897	16/3903	0.000793073	0.0225912	0.0207391	FPRO_06401/FPRO_05057/FPRO_11021/FPRO_05045/FPRO_13463/FPRO_04151/FPRO_09700/FPRO_00592/FPRO_08211/FPRO_01372	10
BP	GO:0035821	modulation of process of another organism	10/897	16/3903	0.000793073	0.0225912	0.0207391	FPRO_06401/FPRO_05057/FPRO_11021/FPRO_05045/FPRO_13463/FPRO_04151/FPRO_00592/FPRO_08211/FPRO_01372/FPRO_01020	10
BP	GO:0019359	nicotinamide nucleotide biosynthetic process	15/897	30/3903	0.00106269	0.0298452	0.0273984	FPRO_13261/FPRO_05057/FPRO_05699/FPRO_04151/FPRO_00592/FPRO_13436/FPRO_03195/FPRO_03103/FPRO_08211/FPRO_09769/FPRO_04442/FPRO_04555/FPRO_00921/FPRO_06193/FPRO_11681	15
BP	GO:0042866	pyruvate biosynthetic process	9/897	14/3903	0.0011079	0.0304371	0.0279418	FPRO_05057/FPRO_05699/FPRO_04151/FPRO_00592/FPRO_13436/FPRO_03195/FPRO_08211/FPRO_09769/FPRO_06193	9
BP	GO:0009145	purine nucleoside triphosphate biosynthetic process	17/897	36/3903	0.00113877	0.0304371	0.0279418	FPRO_05057/FPRO_05699/FPRO_04151/FPRO_00592/FPRO_13436/FPRO_05939/FPRO_03195/FPRO_08211/FPRO_05844/FPRO_09769/FPRO_08384/FPRO_10853/FPRO_09417/FPRO_04760/FPRO_06193/FPRO_01063/FPRO_03223	17
BP	GO:0019674	NAD metabolic process	17/897	36/3903	0.00113877	0.0304371	0.0279418	FPRO_02384/FPRO_13261/FPRO_05057/FPRO_05699/FPRO_04151/FPRO_00592/FPRO_13436/FPRO_03195/FPRO_03103/FPRO_08211/FPRO_11056/FPRO_09769/FPRO_04555/FPRO_00921/FPRO_13262/FPRO_06193/FPRO_14473	17
BP	GO:0072528	pyrimidine-containing compound biosynthetic process	18/897	39/3903	0.00114482	0.0304371	0.0279418	FPRO_03657/FPRO_08120/FPRO_00235/FPRO_03071/FPRO_06318/FPRO_05863/FPRO_06470/FPRO_00732/FPRO_15170/FPRO_02677/FPRO_06094/FPRO_07742/FPRO_08387/FPRO_06109/FPRO_10853/FPRO_00921/FPRO_02992/FPRO_04971	18
BP	GO:0005975	carbohydrate metabolic process	76/897	242/3903	0.00116618	0.0305969	0.0280885	FPRO_02384/FPRO_02984/FPRO_00664/FPRO_08391/FPRO_02236/FPRO_15412/FPRO_08120/FPRO_05057/FPRO_10545/FPRO_05699/FPRO_08103/FPRO_13985/FPRO_04151/FPRO_14272/FPRO_06014/FPRO_00592/FPRO_09723/FPRO_05941/FPRO_04054/FPRO_13436/FPRO_12202/FPRO_15254/FPRO_00819/FPRO_01043/FPRO_04924/FPRO_02362/FPRO_01140/FPRO_00750/FPRO_09930/FPRO_02456/FPRO_03195/FPRO_15322/FPRO_13332/FPRO_04819/FPRO_10473/FPRO_11949/FPR…	76
BP	GO:0072521	purine-containing compound metabolic process	47/897	137/3903	0.0014197	0.0363086	0.0333319	FPRO_05777/FPRO_00079/FPRO_05057/FPRO_11021/FPRO_05699/FPRO_04151/FPRO_03366/FPRO_00592/FPRO_01636/FPRO_10632/FPRO_07787/FPRO_13436/FPRO_04161/FPRO_12793/FPRO_05939/FPRO_03195/FPRO_04343/FPRO_06340/FPRO_08211/FPRO_11056/FPRO_01468/FPRO_07698/FPRO_03521/FPRO_02813/FPRO_07711/FPRO_00990/FPRO_05844/FPRO_09769/FPRO_08384/FPRO_02298/FPRO_08162/FPRO_04719/FPRO_09437/FPRO_10853/FPRO_00921/FPRO_13262/FPR…	47
BP	GO:0009124	nucleoside monophosphate biosynthetic process	22/897	52/3903	0.0014203	0.0363086	0.0333319	FPRO_05057/FPRO_05699/FPRO_04151/FPRO_00592/FPRO_01636/FPRO_13436/FPRO_05939/FPRO_03195/FPRO_08211/FPRO_02677/FPRO_09619/FPRO_00990/FPRO_09769/FPRO_08384/FPRO_07742/FPRO_08387/FPRO_02298/FPRO_09417/FPRO_04760/FPRO_06193/FPRO_01063/FPRO_03223	22
BP	GO:0009435	NAD biosynthetic process	13/897	25/3903	0.00144416	0.0364512	0.0334628	FPRO_13261/FPRO_05057/FPRO_05699/FPRO_04151/FPRO_00592/FPRO_13436/FPRO_03195/FPRO_03103/FPRO_08211/FPRO_09769/FPRO_04555/FPRO_00921/FPRO_06193	13
BP	GO:0009156	ribonucleoside monophosphate biosynthetic process	21/897	49/3903	0.00148885	0.0371097	0.0340673	FPRO_05057/FPRO_05699/FPRO_04151/FPRO_00592/FPRO_01636/FPRO_13436/FPRO_05939/FPRO_03195/FPRO_08211/FPRO_02677/FPRO_09619/FPRO_00990/FPRO_09769/FPRO_08384/FPRO_08387/FPRO_02298/FPRO_09417/FPRO_04760/FPRO_06193/FPRO_01063/FPRO_03223	21
BP	GO:0046434	organophosphate catabolic process	17/897	37/3903	0.00166342	0.0409489	0.0375918	FPRO_02384/FPRO_05057/FPRO_05699/FPRO_04151/FPRO_15017/FPRO_02532/FPRO_00592/FPRO_13436/FPRO_01899/FPRO_03195/FPRO_11949/FPRO_08211/FPRO_05823/FPRO_09769/FPRO_04205/FPRO_11680/FPRO_06193	17
BP	GO:0006165	nucleoside diphosphate phosphorylation	11/897	20/3903	0.00187246	0.0439258	0.0403246	FPRO_05057/FPRO_05699/FPRO_04151/FPRO_00592/FPRO_13436/FPRO_05863/FPRO_03195/FPRO_08211/FPRO_09769/FPRO_06109/FPRO_06193	11
BP	GO:0006220	pyrimidine nucleotide metabolic process	11/897	20/3903	0.00187246	0.0439258	0.0403246	FPRO_08120/FPRO_03071/FPRO_06318/FPRO_05863/FPRO_06470/FPRO_02677/FPRO_06094/FPRO_07742/FPRO_08387/FPRO_06109/FPRO_10853	11
BP	GO:0006221	pyrimidine nucleotide biosynthetic process	11/897	20/3903	0.00187246	0.0439258	0.0403246	FPRO_08120/FPRO_03071/FPRO_06318/FPRO_05863/FPRO_06470/FPRO_02677/FPRO_06094/FPRO_07742/FPRO_08387/FPRO_06109/FPRO_10853	11
BP	GO:0046939	nucleotide phosphorylation	11/897	20/3903	0.00187246	0.0439258	0.0403246	FPRO_05057/FPRO_05699/FPRO_04151/FPRO_00592/FPRO_13436/FPRO_05863/FPRO_03195/FPRO_08211/FPRO_09769/FPRO_06109/FPRO_06193	11
CC	GO:0070069	cytochrome complex	9/866	13/3758	0.000506897	0.0448604	0.0414855	FPRO_04343/FPRO_01468/FPRO_07698/FPRO_07711/FPRO_08162/FPRO_03165/FPRO_01063/FPRO_01540/FPRO_00754	9
BP	GO:0009150	purine ribonucleotide metabolic process	40/897	114/3903	0.00196397	0.0455368	0.0418035	FPRO_05777/FPRO_00079/FPRO_05057/FPRO_05699/FPRO_04151/FPRO_03366/FPRO_00592/FPRO_01636/FPRO_13436/FPRO_04161/FPRO_12793/FPRO_05939/FPRO_03195/FPRO_04343/FPRO_06340/FPRO_08211/FPRO_11056/FPRO_01468/FPRO_07698/FPRO_03521/FPRO_07711/FPRO_00990/FPRO_05844/FPRO_09769/FPRO_08384/FPRO_02298/FPRO_08162/FPRO_04719/FPRO_09437/FPRO_13262/FPRO_03165/FPRO_09417/FPRO_04760/FPRO_06193/FPRO_01063/FPRO_03223/FPR…	40
BP	GO:0006549	isoleucine metabolic process	7/897	10/3903	0.00205012	0.0469877	0.0431356	FPRO_07727/FPRO_10963/FPRO_01751/FPRO_11699/FPRO_07903/FPRO_06219/FPRO_03141	7
BP	GO:0009260	ribonucleotide biosynthetic process	28/897	73/3903	0.00208589	0.0472644	0.0433895	FPRO_00079/FPRO_05057/FPRO_05699/FPRO_04151/FPRO_00592/FPRO_01636/FPRO_13436/FPRO_04161/FPRO_12793/FPRO_05939/FPRO_05863/FPRO_03195/FPRO_06470/FPRO_08211/FPRO_02677/FPRO_09619/FPRO_00990/FPRO_05844/FPRO_09769/FPRO_08384/FPRO_08387/FPRO_02298/FPRO_09417/FPRO_04760/FPRO_06193/FPRO_01063/FPRO_03223/FPRO_13221	28
BP	GO:0046486	glycerolipid metabolic process	41/897	118/3903	0.00214221	0.0479463	0.0440155	FPRO_01104/FPRO_05805/FPRO_06323/FPRO_00589/FPRO_15017/FPRO_10827/FPRO_10632/FPRO_05122/FPRO_06496/FPRO_07694/FPRO_06318/FPRO_10708/FPRO_04130/FPRO_03632/FPRO_06394/FPRO_10509/FPRO_03361/FPRO_06094/FPRO_11832/FPRO_05125/FPRO_11871/FPRO_04545/FPRO_08124/FPRO_11700/FPRO_07945/FPRO_01758/FPRO_11988/FPRO_11680/FPRO_04746/FPRO_00814/FPRO_04849/FPRO_06352/FPRO_05963/FPRO_10657/FPRO_01607/FPRO_10872/FPR…	41
BP	GO:0006875	cellular metal ion homeostasis	39/897	111/3903	0.00216407	0.0479463	0.0440155	FPRO_03170/FPRO_09226/FPRO_05045/FPRO_01028/FPRO_05865/FPRO_13463/FPRO_06531/FPRO_09879/FPRO_06339/FPRO_08673/FPRO_03676/FPRO_11055/FPRO_01086/FPRO_11605/FPRO_11606/FPRO_13037/FPRO_02896/FPRO_10745/FPRO_13135/FPRO_12967/FPRO_09015/FPRO_04259/FPRO_10387/FPRO_13357/FPRO_02700/FPRO_01387/FPRO_04955/FPRO_14247/FPRO_14263/FPRO_06261/FPRO_14260/FPRO_01542/FPRO_10988/FPRO_07847/FPRO_00814/FPRO_04218/FPR…	39
BP	GO:0034599	cellular response to oxidative stress	46/897	136/3903	0.00220703	0.0483607	0.044396	FPRO_00664/FPRO_15682/FPRO_08499/FPRO_06339/FPRO_09723/FPRO_05941/FPRO_09673/FPRO_11833/FPRO_01395/FPRO_04981/FPRO_06100/FPRO_12807/FPRO_11055/FPRO_10022/FPRO_13037/FPRO_02390/FPRO_04808/FPRO_00701/FPRO_12785/FPRO_05980/FPRO_04355/FPRO_14612/FPRO_05823/FPRO_10778/FPRO_08143/FPRO_12794/FPRO_04683/FPRO_03158/FPRO_05887/FPRO_10705/FPRO_02449/FPRO_04613/FPRO_06176/FPRO_07874/FPRO_09691/FPRO_05836/FPR…	46
BP	GO:0009135	purine nucleoside diphosphate metabolic process	13/897	26/3903	0.00228912	0.0490808	0.045057	FPRO_05057/FPRO_05699/FPRO_04151/FPRO_00592/FPRO_13436/FPRO_03195/FPRO_06340/FPRO_08211/FPRO_11056/FPRO_05844/FPRO_09769/FPRO_13262/FPRO_06193	13
BP	GO:0009179	purine ribonucleoside diphosphate metabolic process	13/897	26/3903	0.00228912	0.0490808	0.045057	FPRO_05057/FPRO_05699/FPRO_04151/FPRO_00592/FPRO_13436/FPRO_03195/FPRO_06340/FPRO_08211/FPRO_11056/FPRO_05844/FPRO_09769/FPRO_13262/FPRO_06193	13
BP	GO:0009206	purine ribonucleoside triphosphate biosynthetic process	16/897	35/3903	0.00241814	0.0503557	0.0462274	FPRO_05057/FPRO_05699/FPRO_04151/FPRO_00592/FPRO_13436/FPRO_05939/FPRO_03195/FPRO_08211/FPRO_05844/FPRO_09769/FPRO_08384/FPRO_09417/FPRO_04760/FPRO_06193/FPRO_01063/FPRO_03223	16
BP	GO:0006119	oxidative phosphorylation	15/897	32/3903	0.00242435	0.0503557	0.0462274	FPRO_04343/FPRO_01468/FPRO_07698/FPRO_07711/FPRO_08384/FPRO_08162/FPRO_04719/FPRO_13262/FPRO_03165/FPRO_09417/FPRO_04760/FPRO_01063/FPRO_01540/FPRO_10872/FPRO_00754	15
BP	GO:0019363	pyridine nucleotide biosynthetic process	15/897	32/3903	0.00242435	0.0503557	0.0462274	FPRO_13261/FPRO_05057/FPRO_05699/FPRO_04151/FPRO_00592/FPRO_13436/FPRO_03195/FPRO_03103/FPRO_08211/FPRO_09769/FPRO_04442/FPRO_04555/FPRO_00921/FPRO_06193/FPRO_11681	15
BP	GO:0005996	monosaccharide metabolic process	31/897	84/3903	0.00252631	0.0518561	0.0476048	FPRO_00664/FPRO_08391/FPRO_15412/FPRO_08120/FPRO_05057/FPRO_10545/FPRO_05699/FPRO_04151/FPRO_00592/FPRO_09723/FPRO_04054/FPRO_13436/FPRO_12202/FPRO_01140/FPRO_09930/FPRO_03195/FPRO_14612/FPRO_06340/FPRO_08211/FPRO_11056/FPRO_08143/FPRO_04538/FPRO_09769/FPRO_03679/FPRO_13262/FPRO_10572/FPRO_07915/FPRO_06193/FPRO_06991/FPRO_07997/FPRO_13312	31
BP	GO:0006812	cation transport	68/897	218/3903	0.0025486	0.0518561	0.0476048	FPRO_15412/FPRO_06607/FPRO_09226/FPRO_11655/FPRO_05865/FPRO_07088/FPRO_06531/FPRO_09879/FPRO_01002/FPRO_08673/FPRO_12998/FPRO_04054/FPRO_03676/FPRO_15689/FPRO_04144/FPRO_11055/FPRO_01086/FPRO_11605/FPRO_13829/FPRO_11606/FPRO_04924/FPRO_05939/FPRO_02447/FPRO_10745/FPRO_13135/FPRO_09015/FPRO_04259/FPRO_15345/FPRO_04343/FPRO_04155/FPRO_10387/FPRO_13930/FPRO_02700/FPRO_04672/FPRO_09283/FPRO_13015/FPR…	68
BP	GO:0006952	defense response	10/897	18/3903	0.00274448	0.0552777	0.0507459	FPRO_06401/FPRO_05057/FPRO_11021/FPRO_05045/FPRO_13463/FPRO_04151/FPRO_09700/FPRO_00592/FPRO_08211/FPRO_01372	10
BP	GO:0006979	response to oxidative stress	47/897	141/3903	0.00277353	0.0553042	0.0507702	FPRO_00664/FPRO_15682/FPRO_08499/FPRO_06339/FPRO_09723/FPRO_05941/FPRO_09673/FPRO_11833/FPRO_01395/FPRO_04981/FPRO_06100/FPRO_12807/FPRO_11055/FPRO_10022/FPRO_13037/FPRO_02390/FPRO_04808/FPRO_00701/FPRO_12785/FPRO_05980/FPRO_04355/FPRO_14612/FPRO_05823/FPRO_10778/FPRO_08143/FPRO_12794/FPRO_04683/FPRO_03158/FPRO_05887/FPRO_10705/FPRO_02449/FPRO_04613/FPRO_06176/FPRO_07874/FPRO_09691/FPRO_05836/FPR…	47
BP	GO:0006163	purine nucleotide metabolic process	40/897	116/3903	0.00282883	0.0558483	0.0512697	FPRO_05777/FPRO_00079/FPRO_05057/FPRO_05699/FPRO_04151/FPRO_03366/FPRO_00592/FPRO_01636/FPRO_13436/FPRO_04161/FPRO_12793/FPRO_05939/FPRO_03195/FPRO_04343/FPRO_06340/FPRO_08211/FPRO_11056/FPRO_01468/FPRO_07698/FPRO_03521/FPRO_07711/FPRO_00990/FPRO_05844/FPRO_09769/FPRO_08384/FPRO_02298/FPRO_08162/FPRO_04719/FPRO_09437/FPRO_13262/FPRO_03165/FPRO_09417/FPRO_04760/FPRO_06193/FPRO_01063/FPRO_03223/FPR…	40
BP	GO:0046390	ribose phosphate biosynthetic process	29/897	78/3903	0.00302699	0.0591746	0.0543233	FPRO_00664/FPRO_00079/FPRO_05057/FPRO_05699/FPRO_04151/FPRO_00592/FPRO_01636/FPRO_13436/FPRO_04161/FPRO_12793/FPRO_05939/FPRO_05863/FPRO_03195/FPRO_06470/FPRO_08211/FPRO_02677/FPRO_09619/FPRO_00990/FPRO_05844/FPRO_09769/FPRO_08384/FPRO_08387/FPRO_02298/FPRO_09417/FPRO_04760/FPRO_06193/FPRO_01063/FPRO_03223/FPRO_13221	29
CC	GO:1902495	transmembrane transporter complex	13/866	24/3758	0.000897926	0.059654	0.0551662	FPRO_11605/FPRO_11606/FPRO_03336/FPRO_01468/FPRO_07698/FPRO_07711/FPRO_03105/FPRO_09411/FPRO_04719/FPRO_03165/FPRO_01063/FPRO_01540/FPRO_00754	13
CC	GO:0005740	mitochondrial envelope	94/866	309/3758	0.00109535	0.059654	0.0551662	FPRO_08499/FPRO_00501/FPRO_03149/FPRO_06339/FPRO_01395/FPRO_01427/FPRO_09620/FPRO_09072/FPRO_06100/FPRO_09357/FPRO_03594/FPRO_12807/FPRO_09459/FPRO_07710/FPRO_06496/FPRO_07694/FPRO_13452/FPRO_05939/FPRO_01417/FPRO_02447/FPRO_06318/FPRO_05863/FPRO_09542/FPRO_07707/FPRO_00701/FPRO_06283/FPRO_13638/FPRO_04343/FPRO_09499/FPRO_01256/FPRO_09347/FPRO_00662/FPRO_00596/FPRO_05063/FPRO_02677/FPRO_03336/FPR…	94
CC	GO:0005887	integral component of plasma membrane	33/866	88/3758	0.00142106	0.059654	0.0551662	FPRO_14174/FPRO_15412/FPRO_09226/FPRO_11655/FPRO_07088/FPRO_06531/FPRO_05007/FPRO_01002/FPRO_08673/FPRO_04054/FPRO_14295/FPRO_01740/FPRO_04144/FPRO_01086/FPRO_10925/FPRO_11605/FPRO_11606/FPRO_07677/FPRO_00955/FPRO_02700/FPRO_09283/FPRO_14247/FPRO_04176/FPRO_04826/FPRO_14260/FPRO_15066/FPRO_09663/FPRO_07847/FPRO_05963/FPRO_04158/FPRO_10679/FPRO_06640/FPRO_11603	33
CC	GO:0009277	fungal-type cell wall	30/866	78/3758	0.00145072	0.059654	0.0551662	FPRO_11978/FPRO_06401/FPRO_02236/FPRO_05057/FPRO_09483/FPRO_11021/FPRO_01028/FPRO_08103/FPRO_13463/FPRO_04151/FPRO_15017/FPRO_06856/FPRO_01002/FPRO_00592/FPRO_15453/FPRO_07932/FPRO_01309/FPRO_08211/FPRO_01372/FPRO_03074/FPRO_04560/FPRO_09394/FPRO_09310/FPRO_06108/FPRO_11680/FPRO_15066/FPRO_09277/FPRO_05233/FPRO_06193/FPRO_01101	30
CC	GO:0031967	organelle envelope	116/866	398/3758	0.00168514	0.059654	0.0551662	FPRO_08499/FPRO_00501/FPRO_08188/FPRO_03149/FPRO_06339/FPRO_01395/FPRO_01427/FPRO_09620/FPRO_09072/FPRO_06100/FPRO_09357/FPRO_03594/FPRO_12807/FPRO_09459/FPRO_07710/FPRO_06496/FPRO_07694/FPRO_13452/FPRO_05939/FPRO_01417/FPRO_02447/FPRO_06318/FPRO_05863/FPRO_09542/FPRO_07707/FPRO_00701/FPRO_06283/FPRO_13638/FPRO_06309/FPRO_04343/FPRO_09499/FPRO_01256/FPRO_10463/FPRO_11799/FPRO_09347/FPRO_00662/FPR…	116
CC	GO:0031975	envelope	116/866	398/3758	0.00168514	0.059654	0.0551662	FPRO_08499/FPRO_00501/FPRO_08188/FPRO_03149/FPRO_06339/FPRO_01395/FPRO_01427/FPRO_09620/FPRO_09072/FPRO_06100/FPRO_09357/FPRO_03594/FPRO_12807/FPRO_09459/FPRO_07710/FPRO_06496/FPRO_07694/FPRO_13452/FPRO_05939/FPRO_01417/FPRO_02447/FPRO_06318/FPRO_05863/FPRO_09542/FPRO_07707/FPRO_00701/FPRO_06283/FPRO_13638/FPRO_06309/FPRO_04343/FPRO_09499/FPRO_01256/FPRO_10463/FPRO_11799/FPRO_09347/FPRO_00662/FPR…	116
BP	GO:0072330	monocarboxylic acid biosynthetic process	26/897	68/3903	0.00312914	0.0605777	0.0556113	FPRO_05057/FPRO_05699/FPRO_04151/FPRO_13205/FPRO_00592/FPRO_01513/FPRO_13436/FPRO_04342/FPRO_08109/FPRO_02896/FPRO_03195/FPRO_16165/FPRO_06394/FPRO_08211/FPRO_00931/FPRO_09769/FPRO_04926/FPRO_00477/FPRO_04849/FPRO_06193/FPRO_05207/FPRO_10929/FPRO_00349/FPRO_10570/FPRO_05788/FPRO_14257	26
BP	GO:0009127	purine nucleoside monophosphate biosynthetic process	18/897	42/3903	0.00319305	0.0606376	0.0556663	FPRO_05057/FPRO_05699/FPRO_04151/FPRO_00592/FPRO_01636/FPRO_13436/FPRO_05939/FPRO_03195/FPRO_08211/FPRO_00990/FPRO_09769/FPRO_08384/FPRO_02298/FPRO_09417/FPRO_04760/FPRO_06193/FPRO_01063/FPRO_03223	18
BP	GO:0009168	purine ribonucleoside monophosphate biosynthetic process	18/897	42/3903	0.00319305	0.0606376	0.0556663	FPRO_05057/FPRO_05699/FPRO_04151/FPRO_00592/FPRO_01636/FPRO_13436/FPRO_05939/FPRO_03195/FPRO_08211/FPRO_00990/FPRO_09769/FPRO_08384/FPRO_02298/FPRO_09417/FPRO_04760/FPRO_06193/FPRO_01063/FPRO_03223	18
CC	GO:0031300	intrinsic component of organelle membrane	59/866	182/3758	0.00191291	0.0615609	0.0569297	FPRO_06323/FPRO_04742/FPRO_08475/FPRO_08673/FPRO_01395/FPRO_06021/FPRO_04342/FPRO_03594/FPRO_09459/FPRO_05179/FPRO_04803/FPRO_00259/FPRO_09955/FPRO_02447/FPRO_06318/FPRO_08453/FPRO_10529/FPRO_00388/FPRO_10708/FPRO_04130/FPRO_06283/FPRO_00730/FPRO_03632/FPRO_07968/FPRO_05063/FPRO_03064/FPRO_02677/FPRO_03361/FPRO_01132/FPRO_11832/FPRO_09669/FPRO_08089/FPRO_08179/FPRO_04774/FPRO_01370/FPRO_11747/FPR…	59
CC	GO:0005618	cell wall	31/866	83/3758	0.00211454	0.0618992	0.0572425	FPRO_11978/FPRO_06401/FPRO_02236/FPRO_05057/FPRO_09483/FPRO_11021/FPRO_01028/FPRO_08103/FPRO_13463/FPRO_04151/FPRO_15017/FPRO_06856/FPRO_10238/FPRO_01002/FPRO_00592/FPRO_15453/FPRO_07932/FPRO_01309/FPRO_08211/FPRO_01372/FPRO_03074/FPRO_04560/FPRO_09394/FPRO_09310/FPRO_06108/FPRO_11680/FPRO_15066/FPRO_09277/FPRO_05233/FPRO_06193/FPRO_01101	31
CC	GO:0005743	mitochondrial inner membrane	63/866	198/3758	0.00227314	0.0618992	0.0572425	FPRO_00501/FPRO_06100/FPRO_03594/FPRO_09459/FPRO_07710/FPRO_07694/FPRO_05939/FPRO_02447/FPRO_07707/FPRO_06283/FPRO_13638/FPRO_04343/FPRO_09499/FPRO_01256/FPRO_09347/FPRO_00662/FPRO_00596/FPRO_05063/FPRO_02677/FPRO_03336/FPRO_01468/FPRO_07698/FPRO_03361/FPRO_09619/FPRO_11832/FPRO_07711/FPRO_04774/FPRO_03105/FPRO_13015/FPRO_05830/FPRO_01370/FPRO_02869/FPRO_08384/FPRO_09411/FPRO_04351/FPRO_08162/FPR…	63
BP	GO:0072525	pyridine-containing compound biosynthetic process	17/897	39/3903	0.00332983	0.062211	0.0571107	FPRO_08391/FPRO_13261/FPRO_05057/FPRO_05699/FPRO_04151/FPRO_00592/FPRO_13436/FPRO_03195/FPRO_03103/FPRO_08211/FPRO_09769/FPRO_04442/FPRO_04555/FPRO_00921/FPRO_06193/FPRO_02993/FPRO_11681	17
BP	GO:0042773	ATP synthesis coupled electron transport	12/897	24/3903	0.0033695	0.062211	0.0571107	FPRO_04343/FPRO_01468/FPRO_07698/FPRO_07711/FPRO_08162/FPRO_04719/FPRO_13262/FPRO_03165/FPRO_01063/FPRO_01540/FPRO_10872/FPRO_00754	12
BP	GO:0042775	mitochondrial ATP synthesis coupled electron transport	12/897	24/3903	0.0033695	0.062211	0.0571107	FPRO_04343/FPRO_01468/FPRO_07698/FPRO_07711/FPRO_08162/FPRO_04719/FPRO_13262/FPRO_03165/FPRO_01063/FPRO_01540/FPRO_10872/FPRO_00754	12
CC	GO:0031226	intrinsic component of plasma membrane	40/866	115/3758	0.00247611	0.0626102	0.0579	FPRO_14174/FPRO_02236/FPRO_15412/FPRO_09226/FPRO_11655/FPRO_01028/FPRO_07088/FPRO_15017/FPRO_06531/FPRO_05007/FPRO_01002/FPRO_08673/FPRO_04054/FPRO_15453/FPRO_14295/FPRO_01740/FPRO_04144/FPRO_01086/FPRO_10925/FPRO_11605/FPRO_11606/FPRO_07677/FPRO_00955/FPRO_02700/FPRO_04560/FPRO_09283/FPRO_09394/FPRO_14247/FPRO_04176/FPRO_04826/FPRO_14260/FPRO_11680/FPRO_15066/FPRO_09663/FPRO_07847/FPRO_05963/FPR…	40
CC	GO:0098827	endoplasmic reticulum subcompartment	74/866	241/3758	0.00283922	0.062939	0.0582041	FPRO_06323/FPRO_02842/FPRO_02568/FPRO_08475/FPRO_06098/FPRO_08494/FPRO_07088/FPRO_06856/FPRO_04841/FPRO_10589/FPRO_06021/FPRO_04342/FPRO_01740/FPRO_13293/FPRO_05179/FPRO_00259/FPRO_02526/FPRO_13426/FPRO_01309/FPRO_06156/FPRO_09955/FPRO_06318/FPRO_08453/FPRO_04702/FPRO_10529/FPRO_10708/FPRO_04130/FPRO_00962/FPRO_00730/FPRO_03632/FPRO_01429/FPRO_07968/FPRO_02530/FPRO_03667/FPRO_09611/FPRO_03064/FPR…	74
CC	GO:0019866	organelle inner membrane	65/866	208/3758	0.00318376	0.062939	0.0582041	FPRO_00501/FPRO_06100/FPRO_03594/FPRO_09459/FPRO_07710/FPRO_07694/FPRO_05939/FPRO_02447/FPRO_07707/FPRO_06283/FPRO_13638/FPRO_04343/FPRO_09499/FPRO_01256/FPRO_09347/FPRO_00662/FPRO_00596/FPRO_05063/FPRO_02677/FPRO_03336/FPRO_01468/FPRO_07698/FPRO_03361/FPRO_09619/FPRO_11832/FPRO_07711/FPRO_04774/FPRO_03105/FPRO_13015/FPRO_05830/FPRO_01370/FPRO_02869/FPRO_08384/FPRO_02642/FPRO_09411/FPRO_04351/FPR…	65
CC	GO:0031966	mitochondrial membrane	83/866	277/3758	0.00344501	0.062939	0.0582041	FPRO_08499/FPRO_00501/FPRO_01395/FPRO_01427/FPRO_09620/FPRO_09072/FPRO_06100/FPRO_09357/FPRO_03594/FPRO_09459/FPRO_07710/FPRO_06496/FPRO_07694/FPRO_13452/FPRO_05939/FPRO_01417/FPRO_02447/FPRO_06318/FPRO_07707/FPRO_06283/FPRO_13638/FPRO_04343/FPRO_09499/FPRO_01256/FPRO_09347/FPRO_00662/FPRO_00596/FPRO_05063/FPRO_02677/FPRO_03336/FPRO_03278/FPRO_01468/FPRO_07698/FPRO_03361/FPRO_06094/FPRO_09619/FPR…	83
CC	GO:0062039	biofilm matrix	12/866	24/3758	0.00344743	0.062939	0.0582041	FPRO_05057/FPRO_11021/FPRO_05699/FPRO_00592/FPRO_01636/FPRO_10632/FPRO_08495/FPRO_09542/FPRO_11056/FPRO_01372/FPRO_08147/FPRO_00437	12
CC	GO:0062040	fungal biofilm matrix	12/866	24/3758	0.00344743	0.062939	0.0582041	FPRO_05057/FPRO_11021/FPRO_05699/FPRO_00592/FPRO_01636/FPRO_10632/FPRO_08495/FPRO_09542/FPRO_11056/FPRO_01372/FPRO_08147/FPRO_00437	12
CC	GO:0000322	storage vacuole	88/866	297/3758	0.00373367	0.062939	0.0582041	FPRO_00223/FPRO_11978/FPRO_06401/FPRO_15682/FPRO_03170/FPRO_15412/FPRO_15017/FPRO_06531/FPRO_01002/FPRO_00592/FPRO_08673/FPRO_12998/FPRO_04054/FPRO_03676/FPRO_14295/FPRO_06100/FPRO_04144/FPRO_10925/FPRO_10022/FPRO_11293/FPRO_13135/FPRO_08393/FPRO_12785/FPRO_06470/FPRO_13241/FPRO_04373/FPRO_10387/FPRO_01372/FPRO_06047/FPRO_06269/FPRO_13357/FPRO_01132/FPRO_00955/FPRO_05969/FPRO_03353/FPRO_08143/FPR…	88
CC	GO:0000324	fungal-type vacuole	88/866	297/3758	0.00373367	0.062939	0.0582041	FPRO_00223/FPRO_11978/FPRO_06401/FPRO_15682/FPRO_03170/FPRO_15412/FPRO_15017/FPRO_06531/FPRO_01002/FPRO_00592/FPRO_08673/FPRO_12998/FPRO_04054/FPRO_03676/FPRO_14295/FPRO_06100/FPRO_04144/FPRO_10925/FPRO_10022/FPRO_11293/FPRO_13135/FPRO_08393/FPRO_12785/FPRO_06470/FPRO_13241/FPRO_04373/FPRO_10387/FPRO_01372/FPRO_06047/FPRO_06269/FPRO_13357/FPRO_01132/FPRO_00955/FPRO_05969/FPRO_03353/FPRO_08143/FPR…	88
CC	GO:0031301	integral component of organelle membrane	56/866	176/3758	0.00392493	0.0631557	0.0584045	FPRO_06323/FPRO_04742/FPRO_08475/FPRO_08673/FPRO_01395/FPRO_06021/FPRO_04342/FPRO_03594/FPRO_09459/FPRO_05179/FPRO_04803/FPRO_00259/FPRO_09955/FPRO_02447/FPRO_06318/FPRO_08453/FPRO_10529/FPRO_00388/FPRO_10708/FPRO_04130/FPRO_06283/FPRO_00730/FPRO_03632/FPRO_07968/FPRO_05063/FPRO_03064/FPRO_03361/FPRO_01132/FPRO_11832/FPRO_09669/FPRO_08179/FPRO_04774/FPRO_01370/FPRO_11747/FPRO_04642/FPRO_02642/FPR…	56
BP	GO:0006754	ATP biosynthetic process	15/897	33/3903	0.00351733	0.0643445	0.0590694	FPRO_05057/FPRO_05699/FPRO_04151/FPRO_00592/FPRO_13436/FPRO_05939/FPRO_03195/FPRO_08211/FPRO_09769/FPRO_08384/FPRO_09417/FPRO_04760/FPRO_06193/FPRO_01063/FPRO_03223	15
CC	GO:0005576	extracellular region	40/866	118/3758	0.00418914	0.0644763	0.0596258	FPRO_11978/FPRO_06401/FPRO_00841/FPRO_13948/FPRO_04421/FPRO_11227/FPRO_02236/FPRO_05057/FPRO_11021/FPRO_05699/FPRO_14591/FPRO_13463/FPRO_14272/FPRO_15017/FPRO_00592/FPRO_01636/FPRO_10632/FPRO_08495/FPRO_14055/FPRO_01043/FPRO_11293/FPRO_05863/FPRO_09542/FPRO_10473/FPRO_14280/FPRO_11056/FPRO_01372/FPRO_03937/FPRO_08147/FPRO_13941/FPRO_09394/FPRO_01733/FPRO_09310/FPRO_00294/FPRO_11680/FPRO_06193/FPR…	40
CC	GO:0000323	lytic vacuole	88/866	299/3758	0.00459733	0.0670885	0.0620414	FPRO_00223/FPRO_11978/FPRO_06401/FPRO_15682/FPRO_03170/FPRO_15412/FPRO_15017/FPRO_06531/FPRO_01002/FPRO_00592/FPRO_08673/FPRO_12998/FPRO_04054/FPRO_03676/FPRO_14295/FPRO_06100/FPRO_04144/FPRO_10925/FPRO_10022/FPRO_11293/FPRO_13135/FPRO_08393/FPRO_12785/FPRO_06470/FPRO_13241/FPRO_04373/FPRO_10387/FPRO_01372/FPRO_06047/FPRO_06269/FPRO_13357/FPRO_01132/FPRO_00955/FPRO_05969/FPRO_03353/FPRO_08143/FPR…	88
CC	GO:0005789	endoplasmic reticulum membrane	69/866	227/3758	0.00512634	0.0670885	0.0620414	FPRO_06323/FPRO_02842/FPRO_02568/FPRO_08475/FPRO_06098/FPRO_08494/FPRO_07088/FPRO_06856/FPRO_04841/FPRO_10589/FPRO_06021/FPRO_04342/FPRO_01740/FPRO_13293/FPRO_05179/FPRO_00259/FPRO_02526/FPRO_13426/FPRO_01309/FPRO_06156/FPRO_09955/FPRO_06318/FPRO_08453/FPRO_10529/FPRO_10708/FPRO_04130/FPRO_00962/FPRO_00730/FPRO_03632/FPRO_01429/FPRO_07968/FPRO_02530/FPRO_03667/FPRO_09611/FPRO_03064/FPRO_02666/FPR…	69
CC	GO:0030446	hyphal cell wall	12/866	25/3758	0.00526257	0.0670885	0.0620414	FPRO_06401/FPRO_02236/FPRO_05057/FPRO_11021/FPRO_01028/FPRO_08103/FPRO_13463/FPRO_04151/FPRO_00592/FPRO_08211/FPRO_01372/FPRO_09277	12
CC	GO:0031012	extracellular matrix	12/866	25/3758	0.00526257	0.0670885	0.0620414	FPRO_05057/FPRO_11021/FPRO_05699/FPRO_00592/FPRO_01636/FPRO_10632/FPRO_08495/FPRO_09542/FPRO_11056/FPRO_01372/FPRO_08147/FPRO_00437	12
CC	GO:0098803	respiratory chain complex	13/866	28/3758	0.00530643	0.0670885	0.0620414	FPRO_04343/FPRO_03336/FPRO_01468/FPRO_07698/FPRO_07711/FPRO_03105/FPRO_09411/FPRO_08162/FPRO_04719/FPRO_03165/FPRO_01063/FPRO_01540/FPRO_00754	13
BP	GO:0055065	metal ion homeostasis	39/897	114/3903	0.00372334	0.067494	0.0619607	FPRO_03170/FPRO_09226/FPRO_05045/FPRO_01028/FPRO_05865/FPRO_13463/FPRO_06531/FPRO_09879/FPRO_06339/FPRO_08673/FPRO_03676/FPRO_11055/FPRO_01086/FPRO_11605/FPRO_11606/FPRO_13037/FPRO_02896/FPRO_10745/FPRO_13135/FPRO_12967/FPRO_09015/FPRO_04259/FPRO_10387/FPRO_13357/FPRO_02700/FPRO_01387/FPRO_04955/FPRO_14247/FPRO_14263/FPRO_06261/FPRO_14260/FPRO_01542/FPRO_10988/FPRO_07847/FPRO_00814/FPRO_04218/FPR…	39
BP	GO:0062197	cellular response to chemical stress	57/897	180/3903	0.0038627	0.0693895	0.0637007	FPRO_02384/FPRO_00664/FPRO_15682/FPRO_08499/FPRO_15017/FPRO_06339/FPRO_00592/FPRO_09723/FPRO_05941/FPRO_09673/FPRO_11833/FPRO_01395/FPRO_04981/FPRO_06100/FPRO_12807/FPRO_11055/FPRO_10022/FPRO_13037/FPRO_02390/FPRO_04808/FPRO_00701/FPRO_12785/FPRO_05980/FPRO_04355/FPRO_10574/FPRO_14612/FPRO_10941/FPRO_01372/FPRO_05823/FPRO_10778/FPRO_08143/FPRO_12794/FPRO_04683/FPRO_03158/FPRO_15561/FPRO_05887/FPR…	57
BP	GO:0034220	ion transmembrane transport	79/897	264/3903	0.00418633	0.0745316	0.0684213	FPRO_00223/FPRO_14174/FPRO_15412/FPRO_06607/FPRO_09226/FPRO_11655/FPRO_00501/FPRO_05865/FPRO_07088/FPRO_06531/FPRO_09879/FPRO_01002/FPRO_08673/FPRO_12998/FPRO_04054/FPRO_03676/FPRO_01740/FPRO_07605/FPRO_03594/FPRO_15689/FPRO_04144/FPRO_01086/FPRO_07710/FPRO_11605/FPRO_13829/FPRO_11606/FPRO_05939/FPRO_02447/FPRO_04267/FPRO_10745/FPRO_13135/FPRO_09015/FPRO_13638/FPRO_04259/FPRO_15345/FPRO_04343/FPR…	79
BP	GO:0098655	cation transmembrane transport	60/897	192/3903	0.00428688	0.0756463	0.0694446	FPRO_15412/FPRO_06607/FPRO_09226/FPRO_11655/FPRO_05865/FPRO_07088/FPRO_06531/FPRO_09879/FPRO_01002/FPRO_08673/FPRO_12998/FPRO_04054/FPRO_03676/FPRO_15689/FPRO_04144/FPRO_01086/FPRO_11605/FPRO_13829/FPRO_11606/FPRO_05939/FPRO_02447/FPRO_10745/FPRO_13135/FPRO_09015/FPRO_04259/FPRO_15345/FPRO_04343/FPRO_04155/FPRO_10387/FPRO_13930/FPRO_02700/FPRO_09283/FPRO_13015/FPRO_04955/FPRO_08384/FPRO_03101/FPR…	60
BP	GO:0070887	cellular response to chemical stimulus	128/897	457/3903	0.00446611	0.0781177	0.0717134	FPRO_02384/FPRO_14009/FPRO_04421/FPRO_00664/FPRO_07804/FPRO_02568/FPRO_15682/FPRO_08120/FPRO_08499/FPRO_05057/FPRO_05045/FPRO_09700/FPRO_15017/FPRO_06374/FPRO_06339/FPRO_00592/FPRO_14081/FPRO_09723/FPRO_10727/FPRO_05941/FPRO_09673/FPRO_11833/FPRO_15453/FPRO_01395/FPRO_09072/FPRO_04981/FPRO_06100/FPRO_05122/FPRO_06253/FPRO_07932/FPRO_12807/FPRO_11055/FPRO_10022/FPRO_13037/FPRO_13452/FPRO_02390/FPR…	128
BP	GO:0015891	siderophore transport	7/897	11/3903	0.00452414	0.0784447	0.0720136	FPRO_09226/FPRO_06531/FPRO_09879/FPRO_01086/FPRO_02700/FPRO_14247/FPRO_14260	7
BP	GO:0006811	ion transport	97/897	335/3903	0.00471336	0.0810211	0.0743787	FPRO_00223/FPRO_14174/FPRO_05805/FPRO_15682/FPRO_15412/FPRO_06607/FPRO_09226/FPRO_11655/FPRO_08071/FPRO_00501/FPRO_05865/FPRO_07088/FPRO_06531/FPRO_09879/FPRO_01002/FPRO_08673/FPRO_12998/FPRO_04054/FPRO_03676/FPRO_01740/FPRO_07605/FPRO_03594/FPRO_15689/FPRO_04144/FPRO_11055/FPRO_01086/FPRO_07710/FPRO_11605/FPRO_13829/FPRO_11606/FPRO_07694/FPRO_04924/FPRO_05939/FPRO_02447/FPRO_04267/FPRO_10745/FPR…	97
BP	GO:0006826	iron ion transport	14/897	31/3903	0.00511959	0.0862404	0.0791701	FPRO_09226/FPRO_06531/FPRO_09879/FPRO_01086/FPRO_11605/FPRO_11606/FPRO_04924/FPRO_10745/FPRO_02700/FPRO_04672/FPRO_14247/FPRO_14260/FPRO_06193/FPRO_03585	14
BP	GO:0046364	monosaccharide biosynthetic process	14/897	31/3903	0.00511959	0.0862404	0.0791701	FPRO_00664/FPRO_08120/FPRO_05057/FPRO_05699/FPRO_00592/FPRO_09723/FPRO_13436/FPRO_14612/FPRO_08211/FPRO_08143/FPRO_04538/FPRO_03679/FPRO_07915/FPRO_06193	14
BP	GO:0046031	ADP metabolic process	12/897	25/3903	0.00514674	0.0862404	0.0791701	FPRO_05057/FPRO_05699/FPRO_04151/FPRO_00592/FPRO_13436/FPRO_03195/FPRO_06340/FPRO_08211/FPRO_11056/FPRO_09769/FPRO_13262/FPRO_06193	12
CC	GO:0005746	mitochondrial respirasome	13/866	29/3758	0.00762929	0.0900256	0.0832529	FPRO_04343/FPRO_03336/FPRO_01468/FPRO_07698/FPRO_07711/FPRO_03105/FPRO_09411/FPRO_08162/FPRO_04719/FPRO_03165/FPRO_01063/FPRO_01540/FPRO_00754	13
CC	GO:0070469	respirasome	13/866	29/3758	0.00762929	0.0900256	0.0832529	FPRO_04343/FPRO_03336/FPRO_01468/FPRO_07698/FPRO_07711/FPRO_03105/FPRO_09411/FPRO_08162/FPRO_04719/FPRO_03165/FPRO_01063/FPRO_01540/FPRO_00754	13
BP	GO:0034404	nucleobase-containing small molecule biosynthetic process	18/897	44/3903	0.00579946	0.0958397	0.0879825	FPRO_05057/FPRO_05699/FPRO_04151/FPRO_02532/FPRO_00592/FPRO_13436/FPRO_01899/FPRO_05863/FPRO_03195/FPRO_06470/FPRO_08211/FPRO_02677/FPRO_05844/FPRO_09769/FPRO_08387/FPRO_02298/FPRO_04205/FPRO_06193	18
BP	GO:0097307	response to farnesol	8/897	14/3903	0.0059232	0.0958397	0.0879825	FPRO_04421/FPRO_05057/FPRO_00592/FPRO_11056/FPRO_01372/FPRO_05789/FPRO_05887/FPRO_00518	8
BP	GO:0097308	cellular response to farnesol	8/897	14/3903	0.0059232	0.0958397	0.0879825	FPRO_04421/FPRO_05057/FPRO_00592/FPRO_11056/FPRO_01372/FPRO_05789/FPRO_05887/FPRO_00518	8
BP	GO:1901678	iron coordination entity transport	8/897	14/3903	0.0059232	0.0958397	0.0879825	FPRO_09226/FPRO_06531/FPRO_09879/FPRO_01086/FPRO_02700/FPRO_14247/FPRO_14260/FPRO_06193	8
BP	GO:0008654	phospholipid biosynthetic process	36/897	106/3903	0.00595994	0.0958397	0.0879825	FPRO_05805/FPRO_05777/FPRO_01666/FPRO_03366/FPRO_10632/FPRO_06021/FPRO_06496/FPRO_07694/FPRO_06318/FPRO_10708/FPRO_04130/FPRO_06470/FPRO_03632/FPRO_06394/FPRO_03064/FPRO_06094/FPRO_03521/FPRO_04857/FPRO_11832/FPRO_05125/FPRO_10381/FPRO_11871/FPRO_04545/FPRO_07945/FPRO_01758/FPRO_11988/FPRO_00814/FPRO_06352/FPRO_05963/FPRO_10657/FPRO_01607/FPRO_10872/FPRO_13298/FPRO_04731/FPRO_08449/FPRO_09466	36
BP	GO:0046942	carboxylic acid transport	32/897	92/3903	0.00621988	0.0992195	0.0910852	FPRO_00223/FPRO_15412/FPRO_06607/FPRO_00501/FPRO_07088/FPRO_01002/FPRO_04054/FPRO_07605/FPRO_04144/FPRO_07710/FPRO_00388/FPRO_13638/FPRO_15345/FPRO_09499/FPRO_09347/FPRO_03101/FPRO_03217/FPRO_12924/FPRO_04351/FPRO_07716/FPRO_11123/FPRO_01661/FPRO_10849/FPRO_15066/FPRO_09437/FPRO_02107/FPRO_04588/FPRO_00555/FPRO_10679/FPRO_06640/FPRO_11603/FPRO_09402	32
BP	GO:0019318	hexose metabolic process	25/897	68/3903	0.00674475	0.105684	0.0970195	FPRO_15412/FPRO_08120/FPRO_05057/FPRO_10545/FPRO_05699/FPRO_04151/FPRO_00592/FPRO_04054/FPRO_13436/FPRO_09930/FPRO_03195/FPRO_14612/FPRO_06340/FPRO_08211/FPRO_11056/FPRO_08143/FPRO_04538/FPRO_09769/FPRO_03679/FPRO_13262/FPRO_10572/FPRO_07915/FPRO_06193/FPRO_07997/FPRO_13312	25
BP	GO:0006096	glycolytic process	9/897	17/3903	0.00683711	0.105684	0.0970195	FPRO_05057/FPRO_05699/FPRO_04151/FPRO_00592/FPRO_13436/FPRO_03195/FPRO_08211/FPRO_09769/FPRO_06193	9
BP	GO:0006757	ATP generation from ADP	9/897	17/3903	0.00683711	0.105684	0.0970195	FPRO_05057/FPRO_05699/FPRO_04151/FPRO_00592/FPRO_13436/FPRO_03195/FPRO_08211/FPRO_09769/FPRO_06193	9
BP	GO:0046349	amino sugar biosynthetic process	9/897	17/3903	0.00683711	0.105684	0.0970195	FPRO_01461/FPRO_00819/FPRO_00750/FPRO_15322/FPRO_07677/FPRO_13383/FPRO_09100/FPRO_08257/FPRO_00670	9
BP	GO:0034637	cellular carbohydrate biosynthetic process	22/897	58/3903	0.00706943	0.108434	0.0995445	FPRO_02384/FPRO_08103/FPRO_05941/FPRO_15254/FPRO_00819/FPRO_02362/FPRO_00750/FPRO_15322/FPRO_13332/FPRO_04819/FPRO_07677/FPRO_05864/FPRO_13059/FPRO_03182/FPRO_04545/FPRO_13383/FPRO_10709/FPRO_08257/FPRO_00574/FPRO_00670/FPRO_11848/FPRO_01101	22
BP	GO:0006650	glycerophospholipid metabolic process	34/897	100/3903	0.00727555	0.110744	0.101665	FPRO_05805/FPRO_15017/FPRO_10827/FPRO_10632/FPRO_06496/FPRO_07694/FPRO_06318/FPRO_10708/FPRO_04130/FPRO_03632/FPRO_06394/FPRO_10509/FPRO_03361/FPRO_06094/FPRO_11832/FPRO_05125/FPRO_11871/FPRO_04545/FPRO_08124/FPRO_07945/FPRO_01758/FPRO_11988/FPRO_11680/FPRO_04746/FPRO_00814/FPRO_06352/FPRO_05963/FPRO_10657/FPRO_01607/FPRO_10872/FPRO_13298/FPRO_04731/FPRO_08449/FPRO_09466	34
BP	GO:0009272	fungal-type cell wall biogenesis	24/897	65/3903	0.00739948	0.111777	0.102613	FPRO_04742/FPRO_09770/FPRO_09483/FPRO_05045/FPRO_06856/FPRO_10727/FPRO_15453/FPRO_01309/FPRO_07756/FPRO_00750/FPRO_10509/FPRO_07677/FPRO_05864/FPRO_08143/FPRO_03182/FPRO_05887/FPRO_13383/FPRO_09271/FPRO_10910/FPRO_10709/FPRO_15367/FPRO_07847/FPRO_08257/FPRO_00670	24
BP	GO:1901292	nucleoside phosphate catabolic process	12/897	26/3903	0.00759613	0.11353	0.104222	FPRO_05057/FPRO_05699/FPRO_04151/FPRO_02532/FPRO_00592/FPRO_13436/FPRO_01899/FPRO_03195/FPRO_08211/FPRO_09769/FPRO_04205/FPRO_06193	12
BP	GO:0008652	cellular amino acid biosynthetic process	40/897	122/3903	0.00762938	0.11353	0.104222	FPRO_04421/FPRO_11021/FPRO_01466/FPRO_13202/FPRO_09307/FPRO_08458/FPRO_00812/FPRO_07727/FPRO_10963/FPRO_04208/FPRO_10599/FPRO_08109/FPRO_03098/FPRO_09489/FPRO_06590/FPRO_08393/FPRO_00732/FPRO_01751/FPRO_11699/FPRO_04980/FPRO_04917/FPRO_09456/FPRO_05139/FPRO_07903/FPRO_03390/FPRO_06219/FPRO_00772/FPRO_15504/FPRO_10926/FPRO_00573/FPRO_03120/FPRO_03141/FPRO_04474/FPRO_02992/FPRO_00487/FPRO_10929/FPR…	40
BP	GO:0006879	cellular iron ion homeostasis	21/897	55/3903	0.0077112	0.113897	0.10456	FPRO_09226/FPRO_05045/FPRO_01028/FPRO_06531/FPRO_09879/FPRO_06339/FPRO_11055/FPRO_01086/FPRO_11605/FPRO_11606/FPRO_13037/FPRO_02896/FPRO_10745/FPRO_02700/FPRO_14247/FPRO_14263/FPRO_06261/FPRO_14260/FPRO_01542/FPRO_05233/FPRO_03585	21
CC	GO:0005773	vacuole	89/866	311/3758	0.010071	0.115004	0.106353	FPRO_00223/FPRO_11978/FPRO_06401/FPRO_15682/FPRO_03170/FPRO_15412/FPRO_15017/FPRO_06531/FPRO_01002/FPRO_00592/FPRO_08673/FPRO_12998/FPRO_04054/FPRO_03676/FPRO_14295/FPRO_06100/FPRO_04144/FPRO_10925/FPRO_10022/FPRO_11293/FPRO_13135/FPRO_08393/FPRO_12785/FPRO_06470/FPRO_13241/FPRO_04373/FPRO_10387/FPRO_01372/FPRO_06047/FPRO_06269/FPRO_13357/FPRO_01132/FPRO_00955/FPRO_05969/FPRO_03353/FPRO_08143/FPR…	89
CC	GO:0031970	organelle envelope lumen	20/866	53/3758	0.0109635	0.117608	0.10876	FPRO_03149/FPRO_06339/FPRO_01395/FPRO_06100/FPRO_12807/FPRO_07694/FPRO_05863/FPRO_09542/FPRO_00701/FPRO_06309/FPRO_08143/FPRO_05789/FPRO_01068/FPRO_07874/FPRO_04271/FPRO_10988/FPRO_03165/FPRO_01063/FPRO_02993/FPRO_01628	20
CC	GO:0098573	intrinsic component of mitochondrial membrane	20/866	53/3758	0.0109635	0.117608	0.10876	FPRO_01395/FPRO_03594/FPRO_09459/FPRO_02447/FPRO_06283/FPRO_05063/FPRO_02677/FPRO_03361/FPRO_11832/FPRO_09669/FPRO_04774/FPRO_01370/FPRO_04351/FPRO_03235/FPRO_09691/FPRO_08105/FPRO_00370/FPRO_01589/FPRO_14473/FPRO_10872	20
MF	GO:0022857	transmembrane transporter activity	90/780	288/3372	0.000576892	0.120418	0.118178	FPRO_00223/FPRO_14174/FPRO_15682/FPRO_15412/FPRO_06607/FPRO_09226/FPRO_11655/FPRO_00501/FPRO_05865/FPRO_07088/FPRO_06531/FPRO_05007/FPRO_01002/FPRO_08673/FPRO_12998/FPRO_04054/FPRO_03676/FPRO_14295/FPRO_01740/FPRO_07605/FPRO_03594/FPRO_15689/FPRO_04144/FPRO_01086/FPRO_07710/FPRO_11605/FPRO_13829/FPRO_08456/FPRO_05939/FPRO_04267/FPRO_10745/FPRO_13135/FPRO_01854/FPRO_09015/FPRO_00388/FPRO_12785/FPR…	90
MF	GO:0016491	oxidoreductase activity	96/780	311/3372	0.000603599	0.120418	0.118178	FPRO_02384/FPRO_00523/FPRO_04421/FPRO_00664/FPRO_02842/FPRO_02568/FPRO_08475/FPRO_08499/FPRO_06098/FPRO_08494/FPRO_13985/FPRO_01466/FPRO_13202/FPRO_14272/FPRO_09879/FPRO_06339/FPRO_01513/FPRO_09673/FPRO_11833/FPRO_08458/FPRO_00812/FPRO_01395/FPRO_07787/FPRO_04208/FPRO_10599/FPRO_05179/FPRO_06496/FPRO_11606/FPRO_02526/FPRO_09489/FPRO_00463/FPRO_11940/FPRO_06590/FPRO_15278/FPRO_05186/FPRO_08393/FPR…	96
BP	GO:0098656	anion transmembrane transport	42/897	130/3903	0.00842918	0.123587	0.113455	FPRO_00223/FPRO_14174/FPRO_15412/FPRO_06607/FPRO_00501/FPRO_07088/FPRO_06531/FPRO_01002/FPRO_04054/FPRO_07605/FPRO_03594/FPRO_04144/FPRO_07710/FPRO_11605/FPRO_04267/FPRO_13638/FPRO_15345/FPRO_09499/FPRO_09347/FPRO_00955/FPRO_09283/FPRO_04642/FPRO_03101/FPRO_03217/FPRO_04176/FPRO_04826/FPRO_12924/FPRO_04351/FPRO_07716/FPRO_11123/FPRO_10849/FPRO_15066/FPRO_07847/FPRO_15375/FPRO_02107/FPRO_04588/FPR…	42
CC	GO:0032592	integral component of mitochondrial membrane	19/866	50/3758	0.0119724	0.124653	0.115276	FPRO_01395/FPRO_03594/FPRO_09459/FPRO_02447/FPRO_06283/FPRO_05063/FPRO_03361/FPRO_11832/FPRO_09669/FPRO_04774/FPRO_01370/FPRO_04351/FPRO_03235/FPRO_09691/FPRO_08105/FPRO_00370/FPRO_01589/FPRO_14473/FPRO_10872	19
BP	GO:0019682	glyceraldehyde-3-phosphate metabolic process	7/897	12/3903	0.00872236	0.126952	0.116544	FPRO_00664/FPRO_08391/FPRO_05057/FPRO_05699/FPRO_09723/FPRO_01140/FPRO_07963	7
BP	GO:0015980	energy derivation by oxidation of organic compounds	40/897	123/3903	0.00887627	0.128256	0.117741	FPRO_00079/FPRO_06100/FPRO_09542/FPRO_04343/FPRO_04819/FPRO_06340/FPRO_03469/FPRO_11056/FPRO_04330/FPRO_10537/FPRO_03064/FPRO_08408/FPRO_03336/FPRO_01468/FPRO_07698/FPRO_02640/FPRO_13059/FPRO_07711/FPRO_00990/FPRO_09769/FPRO_08384/FPRO_09310/FPRO_08162/FPRO_12250/FPRO_04719/FPRO_13262/FPRO_03073/FPRO_03165/FPRO_03028/FPRO_09417/FPRO_04760/FPRO_01063/FPRO_04574/FPRO_00804/FPRO_01540/FPRO_11848/FPR…	40
CC	GO:0009986	cell surface	24/866	68/3758	0.0141476	0.139118	0.128653	FPRO_06401/FPRO_02236/FPRO_15682/FPRO_05057/FPRO_11021/FPRO_01028/FPRO_08103/FPRO_13463/FPRO_04151/FPRO_15017/FPRO_01002/FPRO_00592/FPRO_12785/FPRO_08211/FPRO_01372/FPRO_03074/FPRO_02462/FPRO_09394/FPRO_12250/FPRO_11680/FPRO_15066/FPRO_09277/FPRO_09416/FPRO_01101	24
CC	GO:0098800	inner mitochondrial membrane protein complex	24/866	68/3758	0.0141476	0.139118	0.128653	FPRO_09459/FPRO_05939/FPRO_06283/FPRO_04343/FPRO_05063/FPRO_03336/FPRO_01468/FPRO_07698/FPRO_07711/FPRO_04774/FPRO_03105/FPRO_08384/FPRO_09411/FPRO_08162/FPRO_03235/FPRO_04719/FPRO_03165/FPRO_01589/FPRO_09417/FPRO_04760/FPRO_01063/FPRO_03223/FPRO_01540/FPRO_00754	24
BP	GO:0055072	iron ion homeostasis	21/897	56/3903	0.00973742	0.139686	0.128235	FPRO_09226/FPRO_05045/FPRO_01028/FPRO_06531/FPRO_09879/FPRO_06339/FPRO_11055/FPRO_01086/FPRO_11605/FPRO_11606/FPRO_13037/FPRO_02896/FPRO_10745/FPRO_02700/FPRO_14247/FPRO_14263/FPRO_06261/FPRO_14260/FPRO_01542/FPRO_05233/FPRO_03585	21
BP	GO:0045017	glycerolipid biosynthetic process	29/897	84/3903	0.0100506	0.14315	0.131414	FPRO_05805/FPRO_06323/FPRO_00589/FPRO_10632/FPRO_06496/FPRO_07694/FPRO_06318/FPRO_10708/FPRO_04130/FPRO_03632/FPRO_06394/FPRO_06094/FPRO_11832/FPRO_05125/FPRO_11871/FPRO_04545/FPRO_11700/FPRO_07945/FPRO_01758/FPRO_11988/FPRO_00814/FPRO_06352/FPRO_05963/FPRO_10657/FPRO_01607/FPRO_13298/FPRO_04731/FPRO_08449/FPRO_09466	29
BP	GO:0046916	cellular transition metal ion homeostasis	27/897	77/3903	0.0101908	0.144117	0.132302	FPRO_03170/FPRO_09226/FPRO_05045/FPRO_01028/FPRO_13463/FPRO_06531/FPRO_09879/FPRO_06339/FPRO_11055/FPRO_01086/FPRO_11605/FPRO_11606/FPRO_13037/FPRO_02896/FPRO_10745/FPRO_13357/FPRO_02700/FPRO_14247/FPRO_14263/FPRO_06261/FPRO_14260/FPRO_01542/FPRO_10988/FPRO_00814/FPRO_04218/FPRO_05233/FPRO_03585	27
BP	GO:0022900	electron transport chain	17/897	43/3903	0.0107498	0.150303	0.137981	FPRO_00523/FPRO_04343/FPRO_09611/FPRO_04330/FPRO_08408/FPRO_01468/FPRO_07698/FPRO_07711/FPRO_08162/FPRO_07874/FPRO_04719/FPRO_13262/FPRO_03165/FPRO_01063/FPRO_01540/FPRO_10872/FPRO_00754	17
BP	GO:1905039	carboxylic acid transmembrane transport	30/897	88/3903	0.0108587	0.150303	0.137981	FPRO_00223/FPRO_15412/FPRO_06607/FPRO_00501/FPRO_07088/FPRO_01002/FPRO_04054/FPRO_07605/FPRO_04144/FPRO_07710/FPRO_13638/FPRO_15345/FPRO_09499/FPRO_09347/FPRO_03101/FPRO_03217/FPRO_12924/FPRO_04351/FPRO_07716/FPRO_11123/FPRO_10849/FPRO_15066/FPRO_15375/FPRO_02107/FPRO_04588/FPRO_00555/FPRO_10679/FPRO_06640/FPRO_11603/FPRO_09402	30
BP	GO:0055085	transmembrane transport	113/897	408/3903	0.0108921	0.150303	0.137981	FPRO_00223/FPRO_02384/FPRO_14174/FPRO_15682/FPRO_15412/FPRO_06607/FPRO_09226/FPRO_11655/FPRO_00501/FPRO_05865/FPRO_07088/FPRO_06531/FPRO_09879/FPRO_05007/FPRO_01002/FPRO_06339/FPRO_08673/FPRO_12998/FPRO_04054/FPRO_03676/FPRO_14295/FPRO_01740/FPRO_07605/FPRO_03594/FPRO_15689/FPRO_04144/FPRO_01086/FPRO_07710/FPRO_11605/FPRO_13829/FPRO_11606/FPRO_08456/FPRO_05939/FPRO_02447/FPRO_04267/FPRO_10745/FPR…	113
BP	GO:0006206	pyrimidine nucleobase metabolic process	9/897	18/3903	0.0109297	0.150303	0.137981	FPRO_02532/FPRO_03071/FPRO_06470/FPRO_00732/FPRO_15170/FPRO_02677/FPRO_08387/FPRO_02992/FPRO_11031	9
BP	GO:0044403	biological process involved in symbiotic interaction	22/897	60/3903	0.0110768	0.150982	0.138604	FPRO_06401/FPRO_05057/FPRO_11021/FPRO_05045/FPRO_13463/FPRO_04151/FPRO_09700/FPRO_15017/FPRO_00592/FPRO_06253/FPRO_11293/FPRO_10574/FPRO_14280/FPRO_08211/FPRO_01372/FPRO_01020/FPRO_00931/FPRO_01733/FPRO_10705/FPRO_08437/FPRO_11680/FPRO_09277	22
BP	GO:0033993	response to lipid	11/897	24/3903	0.0111504	0.150982	0.138604	FPRO_04421/FPRO_15682/FPRO_05057/FPRO_09700/FPRO_00592/FPRO_12785/FPRO_11056/FPRO_01372/FPRO_05789/FPRO_05887/FPRO_00518	11
BP	GO:0034755	iron ion transmembrane transport	10/897	21/3903	0.0112063	0.150982	0.138604	FPRO_09226/FPRO_06531/FPRO_09879/FPRO_01086/FPRO_11605/FPRO_11606/FPRO_10745/FPRO_02700/FPRO_14247/FPRO_14260	10
BP	GO:0042546	cell wall biogenesis	29/897	85/3903	0.012007	0.159534	0.146455	FPRO_04742/FPRO_09770/FPRO_09483/FPRO_05045/FPRO_06856/FPRO_10727/FPRO_10650/FPRO_15453/FPRO_15254/FPRO_00819/FPRO_11293/FPRO_01309/FPRO_07756/FPRO_00750/FPRO_15322/FPRO_10509/FPRO_07677/FPRO_05864/FPRO_08143/FPRO_03182/FPRO_05887/FPRO_13383/FPRO_09271/FPRO_10910/FPRO_10709/FPRO_15367/FPRO_07847/FPRO_08257/FPRO_00670	29
BP	GO:0006520	cellular amino acid metabolic process	72/897	247/3903	0.0120324	0.159534	0.146455	FPRO_04421/FPRO_13261/FPRO_08943/FPRO_11021/FPRO_01466/FPRO_13202/FPRO_09307/FPRO_13205/FPRO_09182/FPRO_10632/FPRO_08458/FPRO_00812/FPRO_07727/FPRO_10963/FPRO_04208/FPRO_10599/FPRO_08109/FPRO_08361/FPRO_03098/FPRO_09489/FPRO_06590/FPRO_07902/FPRO_08393/FPRO_00611/FPRO_03103/FPRO_00732/FPRO_01751/FPRO_06340/FPRO_08360/FPRO_11699/FPRO_11056/FPRO_04980/FPRO_04917/FPRO_09456/FPRO_05139/FPRO_07903/FPR…	72
BP	GO:0006643	membrane lipid metabolic process	27/897	78/3903	0.0122748	0.159534	0.146455	FPRO_06323/FPRO_13459/FPRO_00589/FPRO_06098/FPRO_08494/FPRO_04342/FPRO_13293/FPRO_10022/FPRO_10708/FPRO_04130/FPRO_00730/FPRO_03632/FPRO_02559/FPRO_03353/FPRO_06400/FPRO_04926/FPRO_07626/FPRO_11988/FPRO_07847/FPRO_13265/FPRO_00814/FPRO_05963/FPRO_10657/FPRO_01607/FPRO_13298/FPRO_10570/FPRO_05919	27
BP	GO:0055076	transition metal ion homeostasis	27/897	78/3903	0.0122748	0.159534	0.146455	FPRO_03170/FPRO_09226/FPRO_05045/FPRO_01028/FPRO_13463/FPRO_06531/FPRO_09879/FPRO_06339/FPRO_11055/FPRO_01086/FPRO_11605/FPRO_11606/FPRO_13037/FPRO_02896/FPRO_10745/FPRO_13357/FPRO_02700/FPRO_14247/FPRO_14263/FPRO_06261/FPRO_14260/FPRO_01542/FPRO_10988/FPRO_00814/FPRO_04218/FPRO_05233/FPRO_03585	27
BP	GO:0006164	purine nucleotide biosynthetic process	23/897	64/3903	0.0124065	0.159534	0.146455	FPRO_00079/FPRO_05057/FPRO_05699/FPRO_04151/FPRO_00592/FPRO_01636/FPRO_13436/FPRO_04161/FPRO_12793/FPRO_05939/FPRO_03195/FPRO_08211/FPRO_00990/FPRO_05844/FPRO_09769/FPRO_08384/FPRO_02298/FPRO_09417/FPRO_04760/FPRO_06193/FPRO_01063/FPRO_03223/FPRO_13221	23
BP	GO:0009152	purine ribonucleotide biosynthetic process	23/897	64/3903	0.0124065	0.159534	0.146455	FPRO_00079/FPRO_05057/FPRO_05699/FPRO_04151/FPRO_00592/FPRO_01636/FPRO_13436/FPRO_04161/FPRO_12793/FPRO_05939/FPRO_03195/FPRO_08211/FPRO_00990/FPRO_05844/FPRO_09769/FPRO_08384/FPRO_02298/FPRO_09417/FPRO_04760/FPRO_06193/FPRO_01063/FPRO_03223/FPRO_13221	23
BP	GO:0046488	phosphatidylinositol metabolic process	23/897	64/3903	0.0124065	0.159534	0.146455	FPRO_15017/FPRO_10827/FPRO_06318/FPRO_10708/FPRO_04130/FPRO_03632/FPRO_06394/FPRO_10509/FPRO_06094/FPRO_08124/FPRO_07945/FPRO_01758/FPRO_11988/FPRO_11680/FPRO_04746/FPRO_00814/FPRO_06352/FPRO_05963/FPRO_10657/FPRO_01607/FPRO_13298/FPRO_04731/FPRO_09466	23
BP	GO:0006090	pyruvate metabolic process	15/897	37/3903	0.012508	0.159534	0.146455	FPRO_05057/FPRO_05699/FPRO_04151/FPRO_00592/FPRO_01513/FPRO_13436/FPRO_03195/FPRO_06340/FPRO_08211/FPRO_11056/FPRO_09769/FPRO_13262/FPRO_06193/FPRO_00437/FPRO_13221	15
BP	GO:0048878	chemical homeostasis	60/897	201/3903	0.0125611	0.159534	0.146455	FPRO_02384/FPRO_14009/FPRO_15682/FPRO_03170/FPRO_00589/FPRO_09226/FPRO_05045/FPRO_01028/FPRO_05865/FPRO_13463/FPRO_06531/FPRO_09879/FPRO_06339/FPRO_02532/FPRO_08673/FPRO_03676/FPRO_11055/FPRO_01086/FPRO_11605/FPRO_11606/FPRO_13037/FPRO_02896/FPRO_10745/FPRO_13135/FPRO_12967/FPRO_09015/FPRO_12785/FPRO_03195/FPRO_04259/FPRO_02559/FPRO_10387/FPRO_13357/FPRO_02700/FPRO_03022/FPRO_01387/FPRO_09769/FPR…	60
BP	GO:0051701	biological process involved in interaction with host	18/897	47/3903	0.0127181	0.160505	0.147346	FPRO_06401/FPRO_05057/FPRO_11021/FPRO_05045/FPRO_13463/FPRO_04151/FPRO_15017/FPRO_00592/FPRO_06253/FPRO_14280/FPRO_08211/FPRO_01372/FPRO_00931/FPRO_01733/FPRO_10705/FPRO_08437/FPRO_11680/FPRO_09277	18
BP	GO:0009218	pyrimidine ribonucleotide metabolic process	6/897	10/3903	0.0128598	0.161273	0.148051	FPRO_05863/FPRO_06470/FPRO_02677/FPRO_08387/FPRO_06109/FPRO_10853	6
BP	GO:0044182	filamentous growth of a population of unicellular organisms	48/897	156/3903	0.0136896	0.170607	0.15662	FPRO_06401/FPRO_04421/FPRO_02568/FPRO_11655/FPRO_05057/FPRO_05045/FPRO_04151/FPRO_09700/FPRO_01002/FPRO_00592/FPRO_10727/FPRO_05941/FPRO_15453/FPRO_04981/FPRO_06253/FPRO_04924/FPRO_02390/FPRO_13354/FPRO_04267/FPRO_00962/FPRO_04355/FPRO_10574/FPRO_03937/FPRO_11205/FPRO_11832/FPRO_02640/FPRO_08143/FPRO_00931/FPRO_04672/FPRO_06152/FPRO_08135/FPRO_05887/FPRO_04545/FPRO_09271/FPRO_10408/FPRO_09518/FPR…	48
MF	GO:0005215	transporter activity	99/780	330/3372	0.00146166	0.175118	0.171861	FPRO_00223/FPRO_14174/FPRO_05805/FPRO_15682/FPRO_15412/FPRO_06607/FPRO_09226/FPRO_11655/FPRO_00501/FPRO_05865/FPRO_07088/FPRO_06531/FPRO_05007/FPRO_01002/FPRO_08673/FPRO_12998/FPRO_04054/FPRO_03676/FPRO_10589/FPRO_14295/FPRO_01740/FPRO_07605/FPRO_03594/FPRO_15689/FPRO_04144/FPRO_01086/FPRO_07710/FPRO_11605/FPRO_13829/FPRO_07694/FPRO_08456/FPRO_05939/FPRO_04267/FPRO_10745/FPRO_13135/FPRO_04702/FPR…	99
MF	GO:0008514	organic anion transmembrane transporter activity	33/780	89/3372	0.00186929	0.175118	0.171861	FPRO_00223/FPRO_14174/FPRO_15412/FPRO_06607/FPRO_00501/FPRO_07088/FPRO_01002/FPRO_04054/FPRO_07605/FPRO_04144/FPRO_07710/FPRO_13638/FPRO_15345/FPRO_09499/FPRO_09347/FPRO_09283/FPRO_04642/FPRO_03217/FPRO_04176/FPRO_12924/FPRO_04351/FPRO_07716/FPRO_11123/FPRO_10849/FPRO_15066/FPRO_07847/FPRO_02107/FPRO_04588/FPRO_00555/FPRO_10679/FPRO_06640/FPRO_11603/FPRO_09402	33
MF	GO:0016879	ligase activity, forming carbon-nitrogen bonds	16/780	35/3372	0.00257882	0.175118	0.171861	FPRO_00079/FPRO_13205/FPRO_07787/FPRO_08109/FPRO_02896/FPRO_03098/FPRO_06470/FPRO_00732/FPRO_04967/FPRO_02869/FPRO_02298/FPRO_13000/FPRO_01587/FPRO_09297/FPRO_02992/FPRO_05207	16
MF	GO:0008509	anion transmembrane transporter activity	36/780	101/3372	0.00263335	0.175118	0.171861	FPRO_00223/FPRO_14174/FPRO_15412/FPRO_06607/FPRO_00501/FPRO_07088/FPRO_01002/FPRO_04054/FPRO_07605/FPRO_04144/FPRO_07710/FPRO_04267/FPRO_13638/FPRO_15345/FPRO_09499/FPRO_09347/FPRO_00955/FPRO_09283/FPRO_04642/FPRO_03217/FPRO_04176/FPRO_04826/FPRO_12924/FPRO_04351/FPRO_07716/FPRO_11123/FPRO_10849/FPRO_15066/FPRO_07847/FPRO_02107/FPRO_04588/FPRO_00555/FPRO_10679/FPRO_06640/FPRO_11603/FPRO_09402	36
BP	GO:0072522	purine-containing compound biosynthetic process	25/897	72/3903	0.0150016	0.181469	0.166592	FPRO_00079/FPRO_05057/FPRO_11021/FPRO_05699/FPRO_04151/FPRO_00592/FPRO_01636/FPRO_07787/FPRO_13436/FPRO_04161/FPRO_12793/FPRO_05939/FPRO_03195/FPRO_08211/FPRO_00990/FPRO_05844/FPRO_09769/FPRO_08384/FPRO_02298/FPRO_09417/FPRO_04760/FPRO_06193/FPRO_01063/FPRO_03223/FPRO_13221	25
BP	GO:0072348	sulfur compound transport	12/897	28/3903	0.0151392	0.181469	0.166592	FPRO_07088/FPRO_06531/FPRO_04144/FPRO_04267/FPRO_00955/FPRO_09283/FPRO_13015/FPRO_03101/FPRO_12924/FPRO_10849/FPRO_15073/FPRO_11603	12
BP	GO:0002376	immune system process	7/897	13/3903	0.0151983	0.181469	0.166592	FPRO_00664/FPRO_05045/FPRO_13463/FPRO_09700/FPRO_14280/FPRO_01372/FPRO_01733	7
BP	GO:0006038	cell wall chitin biosynthetic process	7/897	13/3903	0.0151983	0.181469	0.166592	FPRO_00819/FPRO_00750/FPRO_15322/FPRO_07677/FPRO_13383/FPRO_08257/FPRO_00670	7
BP	GO:0009082	branched-chain amino acid biosynthetic process	7/897	13/3903	0.0151983	0.181469	0.166592	FPRO_10963/FPRO_01751/FPRO_11699/FPRO_05139/FPRO_07903/FPRO_06219/FPRO_03141	7
BP	GO:0009225	nucleotide-sugar metabolic process	7/897	13/3903	0.0151983	0.181469	0.166592	FPRO_01461/FPRO_09770/FPRO_00819/FPRO_00750/FPRO_09100/FPRO_10572/FPRO_01101	7
BP	GO:0046131	pyrimidine ribonucleoside metabolic process	7/897	13/3903	0.0151983	0.181469	0.166592	FPRO_05863/FPRO_06470/FPRO_02677/FPRO_08387/FPRO_06109/FPRO_10853/FPRO_00921	7
BP	GO:1901607	alpha-amino acid biosynthetic process	36/897	112/3903	0.0153448	0.181469	0.166592	FPRO_04421/FPRO_11021/FPRO_01466/FPRO_08458/FPRO_00812/FPRO_07727/FPRO_10963/FPRO_04208/FPRO_10599/FPRO_08109/FPRO_03098/FPRO_09489/FPRO_00732/FPRO_01751/FPRO_11699/FPRO_04980/FPRO_04917/FPRO_09456/FPRO_05139/FPRO_07903/FPRO_03390/FPRO_06219/FPRO_00772/FPRO_15504/FPRO_10926/FPRO_00573/FPRO_03120/FPRO_03141/FPRO_04474/FPRO_02992/FPRO_00487/FPRO_10929/FPRO_02935/FPRO_11834/FPRO_10611/FPRO_09694	36
BP	GO:0015849	organic acid transport	33/897	101/3903	0.0154072	0.181469	0.166592	FPRO_00223/FPRO_15412/FPRO_06607/FPRO_00501/FPRO_07088/FPRO_01002/FPRO_04054/FPRO_07605/FPRO_04144/FPRO_07710/FPRO_00388/FPRO_13638/FPRO_15345/FPRO_09499/FPRO_09347/FPRO_03101/FPRO_03217/FPRO_12924/FPRO_04351/FPRO_07716/FPRO_11123/FPRO_01661/FPRO_10849/FPRO_15066/FPRO_09437/FPRO_15375/FPRO_02107/FPRO_04588/FPRO_00555/FPRO_10679/FPRO_06640/FPRO_11603/FPRO_09402	33
BP	GO:0015711	organic anion transport	48/897	157/3903	0.0154713	0.181469	0.166592	FPRO_00223/FPRO_14174/FPRO_05805/FPRO_15682/FPRO_15412/FPRO_06607/FPRO_00501/FPRO_07088/FPRO_06531/FPRO_01002/FPRO_04054/FPRO_07605/FPRO_04144/FPRO_07710/FPRO_07694/FPRO_00388/FPRO_12785/FPRO_13638/FPRO_15345/FPRO_09499/FPRO_06394/FPRO_09347/FPRO_09599/FPRO_09283/FPRO_04642/FPRO_03101/FPRO_03217/FPRO_04176/FPRO_02941/FPRO_12924/FPRO_04351/FPRO_07716/FPRO_11123/FPRO_01661/FPRO_10849/FPRO_15066/FPR…	48
BP	GO:0043436	oxoacid metabolic process	118/897	433/3903	0.0157743	0.183941	0.168861	FPRO_04421/FPRO_00079/FPRO_13261/FPRO_08120/FPRO_05057/FPRO_08943/FPRO_11021/FPRO_05699/FPRO_06098/FPRO_00503/FPRO_04151/FPRO_01466/FPRO_13202/FPRO_03149/FPRO_09307/FPRO_09700/FPRO_13205/FPRO_09182/FPRO_00592/FPRO_10632/FPRO_01513/FPRO_11833/FPRO_08458/FPRO_00812/FPRO_07787/FPRO_13436/FPRO_04342/FPRO_07727/FPRO_10963/FPRO_04208/FPRO_10599/FPRO_08109/FPRO_13037/FPRO_08361/FPRO_02896/FPRO_03098/FPR…	118
BP	GO:0050801	ion homeostasis	50/897	165/3903	0.0162238	0.187958	0.172548	FPRO_15682/FPRO_03170/FPRO_09226/FPRO_05045/FPRO_01028/FPRO_05865/FPRO_13463/FPRO_06531/FPRO_09879/FPRO_06339/FPRO_08673/FPRO_03676/FPRO_11055/FPRO_01086/FPRO_11605/FPRO_11606/FPRO_13037/FPRO_02896/FPRO_10745/FPRO_13135/FPRO_12967/FPRO_09015/FPRO_12785/FPRO_03195/FPRO_04259/FPRO_02559/FPRO_10387/FPRO_13357/FPRO_02700/FPRO_01387/FPRO_04955/FPRO_14247/FPRO_00802/FPRO_04826/FPRO_04613/FPRO_14263/FPR…	50
BP	GO:0044000	movement in host	8/897	16/3903	0.0163081	0.187958	0.172548	FPRO_05057/FPRO_05045/FPRO_15017/FPRO_00592/FPRO_01372/FPRO_00931/FPRO_10705/FPRO_11680	8
BP	GO:0019646	aerobic electron transport chain	10/897	22/3903	0.0164015	0.187958	0.172548	FPRO_04343/FPRO_01468/FPRO_07698/FPRO_07711/FPRO_08162/FPRO_04719/FPRO_03165/FPRO_01063/FPRO_01540/FPRO_00754	10
BP	GO:0030003	cellular cation homeostasis	46/897	150/3903	0.0165963	0.188214	0.172784	FPRO_15682/FPRO_03170/FPRO_09226/FPRO_05045/FPRO_01028/FPRO_05865/FPRO_13463/FPRO_06531/FPRO_09879/FPRO_06339/FPRO_08673/FPRO_03676/FPRO_11055/FPRO_01086/FPRO_11605/FPRO_11606/FPRO_13037/FPRO_02896/FPRO_10745/FPRO_13135/FPRO_12967/FPRO_09015/FPRO_12785/FPRO_03195/FPRO_04259/FPRO_10387/FPRO_13357/FPRO_02700/FPRO_01387/FPRO_04955/FPRO_14247/FPRO_00802/FPRO_04826/FPRO_04613/FPRO_14263/FPRO_06261/FPR…	46
BP	GO:0046112	nucleobase biosynthetic process	9/897	19/3903	0.0166127	0.188214	0.172784	FPRO_11021/FPRO_01636/FPRO_07787/FPRO_03071/FPRO_06470/FPRO_00732/FPRO_15170/FPRO_02677/FPRO_02992	9
BP	GO:0006082	organic acid metabolic process	118/897	434/3903	0.0169572	0.191032	0.175371	FPRO_04421/FPRO_00079/FPRO_13261/FPRO_08120/FPRO_05057/FPRO_08943/FPRO_11021/FPRO_05699/FPRO_06098/FPRO_00503/FPRO_04151/FPRO_01466/FPRO_13202/FPRO_03149/FPRO_09307/FPRO_09700/FPRO_13205/FPRO_09182/FPRO_00592/FPRO_10632/FPRO_01513/FPRO_11833/FPRO_08458/FPRO_00812/FPRO_07787/FPRO_13436/FPRO_04342/FPRO_07727/FPRO_10963/FPRO_04208/FPRO_10599/FPRO_08109/FPRO_13037/FPRO_08361/FPRO_02896/FPRO_03098/FPR…	118
CC	GO:0042175	nuclear outer membrane-endoplasmic reticulum membrane network	69/866	240/3758	0.0200173	0.191517	0.177109	FPRO_06323/FPRO_02842/FPRO_02568/FPRO_08475/FPRO_06098/FPRO_08494/FPRO_07088/FPRO_06856/FPRO_04841/FPRO_10589/FPRO_06021/FPRO_04342/FPRO_01740/FPRO_13293/FPRO_05179/FPRO_00259/FPRO_02526/FPRO_13426/FPRO_01309/FPRO_06156/FPRO_09955/FPRO_06318/FPRO_08453/FPRO_10529/FPRO_10708/FPRO_04130/FPRO_00962/FPRO_00730/FPRO_03632/FPRO_01429/FPRO_07968/FPRO_02530/FPRO_03667/FPRO_09611/FPRO_03064/FPRO_02666/FPR…	69
BP	GO:1901605	alpha-amino acid metabolic process	54/897	181/3903	0.0175616	0.196729	0.1806	FPRO_04421/FPRO_13261/FPRO_08943/FPRO_11021/FPRO_01466/FPRO_13205/FPRO_10632/FPRO_08458/FPRO_00812/FPRO_07727/FPRO_10963/FPRO_04208/FPRO_10599/FPRO_08109/FPRO_08361/FPRO_03098/FPRO_09489/FPRO_07902/FPRO_03103/FPRO_00732/FPRO_01751/FPRO_06340/FPRO_08360/FPRO_11699/FPRO_11056/FPRO_04980/FPRO_04917/FPRO_09456/FPRO_05139/FPRO_07903/FPRO_03390/FPRO_06219/FPRO_00772/FPRO_15504/FPRO_09324/FPRO_04555/FPR…	54
BP	GO:1903825	organic acid transmembrane transport	30/897	91/3903	0.0178707	0.199074	0.182753	FPRO_00223/FPRO_15412/FPRO_06607/FPRO_00501/FPRO_07088/FPRO_01002/FPRO_04054/FPRO_07605/FPRO_04144/FPRO_07710/FPRO_13638/FPRO_15345/FPRO_09499/FPRO_09347/FPRO_03101/FPRO_03217/FPRO_12924/FPRO_04351/FPRO_07716/FPRO_11123/FPRO_10849/FPRO_15066/FPRO_15375/FPRO_02107/FPRO_04588/FPRO_00555/FPRO_10679/FPRO_06640/FPRO_11603/FPRO_09402	30
CC	GO:0005811	lipid droplet	15/866	39/3758	0.0216165	0.201375	0.186225	FPRO_01104/FPRO_05805/FPRO_06323/FPRO_02568/FPRO_00589/FPRO_09483/FPRO_10650/FPRO_09072/FPRO_05122/FPRO_06496/FPRO_06394/FPRO_05125/FPRO_03163/FPRO_09437/FPRO_06193	15
BP	GO:0019752	carboxylic acid metabolic process	114/897	419/3903	0.0184422	0.204298	0.187549	FPRO_04421/FPRO_00079/FPRO_13261/FPRO_08120/FPRO_05057/FPRO_08943/FPRO_11021/FPRO_05699/FPRO_06098/FPRO_00503/FPRO_04151/FPRO_01466/FPRO_13202/FPRO_03149/FPRO_09307/FPRO_09700/FPRO_13205/FPRO_09182/FPRO_00592/FPRO_10632/FPRO_01513/FPRO_11833/FPRO_08458/FPRO_00812/FPRO_07787/FPRO_13436/FPRO_04342/FPRO_07727/FPRO_10963/FPRO_04208/FPRO_10599/FPRO_08109/FPRO_08361/FPRO_02896/FPRO_03098/FPRO_09489/FPR…	114
BP	GO:0046474	glycerophospholipid biosynthetic process	26/897	77/3903	0.019345	0.213116	0.195644	FPRO_05805/FPRO_10632/FPRO_06496/FPRO_07694/FPRO_06318/FPRO_10708/FPRO_04130/FPRO_03632/FPRO_06394/FPRO_06094/FPRO_11832/FPRO_05125/FPRO_11871/FPRO_04545/FPRO_07945/FPRO_01758/FPRO_11988/FPRO_00814/FPRO_06352/FPRO_05963/FPRO_10657/FPRO_01607/FPRO_13298/FPRO_04731/FPRO_08449/FPRO_09466	26
BP	GO:0006873	cellular ion homeostasis	48/897	159/3903	0.0196026	0.214767	0.19716	FPRO_15682/FPRO_03170/FPRO_09226/FPRO_05045/FPRO_01028/FPRO_05865/FPRO_13463/FPRO_06531/FPRO_09879/FPRO_06339/FPRO_08673/FPRO_03676/FPRO_11055/FPRO_01086/FPRO_11605/FPRO_11606/FPRO_13037/FPRO_02896/FPRO_10745/FPRO_13135/FPRO_12967/FPRO_09015/FPRO_12785/FPRO_03195/FPRO_04259/FPRO_02559/FPRO_10387/FPRO_13357/FPRO_02700/FPRO_01387/FPRO_04955/FPRO_14247/FPRO_00802/FPRO_04826/FPRO_04613/FPRO_14263/FPR…	48
BP	GO:0098771	inorganic ion homeostasis	44/897	144/3903	0.0201156	0.218281	0.200386	FPRO_03170/FPRO_09226/FPRO_05045/FPRO_01028/FPRO_05865/FPRO_13463/FPRO_06531/FPRO_09879/FPRO_06339/FPRO_08673/FPRO_03676/FPRO_11055/FPRO_01086/FPRO_11605/FPRO_11606/FPRO_13037/FPRO_02896/FPRO_10745/FPRO_13135/FPRO_12967/FPRO_09015/FPRO_03195/FPRO_04259/FPRO_10387/FPRO_13357/FPRO_02700/FPRO_01387/FPRO_04955/FPRO_14247/FPRO_00802/FPRO_04826/FPRO_04613/FPRO_14263/FPRO_06261/FPRO_09628/FPRO_14260/FPR…	44
BP	GO:0006665	sphingolipid metabolic process	18/897	49/3903	0.0201423	0.218281	0.200386	FPRO_06323/FPRO_13459/FPRO_00589/FPRO_06098/FPRO_08494/FPRO_04342/FPRO_13293/FPRO_10022/FPRO_00730/FPRO_02559/FPRO_03353/FPRO_06400/FPRO_04926/FPRO_07626/FPRO_07847/FPRO_13265/FPRO_10570/FPRO_05919	18
BP	GO:0009267	cellular response to starvation	41/897	133/3903	0.0210033	0.226382	0.207822	FPRO_06401/FPRO_02568/FPRO_15412/FPRO_05057/FPRO_05045/FPRO_04151/FPRO_09700/FPRO_02532/FPRO_04054/FPRO_00812/FPRO_03676/FPRO_01086/FPRO_10022/FPRO_13037/FPRO_02896/FPRO_04924/FPRO_04267/FPRO_10387/FPRO_03937/FPRO_01132/FPRO_11832/FPRO_08143/FPRO_10598/FPRO_06152/FPRO_09441/FPRO_08135/FPRO_04545/FPRO_03217/FPRO_06403/FPRO_14263/FPRO_06261/FPRO_09691/FPRO_04271/FPRO_01661/FPRO_08437/FPRO_13265/FPR…	41
BP	GO:0009069	serine family amino acid metabolic process	15/897	39/3903	0.0211336	0.226561	0.207987	FPRO_11021/FPRO_10632/FPRO_07727/FPRO_04208/FPRO_08361/FPRO_09489/FPRO_07902/FPRO_08360/FPRO_09456/FPRO_03390/FPRO_00772/FPRO_09324/FPRO_00084/FPRO_10929/FPRO_02935	15
CC	GO:1990204	oxidoreductase complex	18/866	50/3758	0.0255422	0.227027	0.209947	FPRO_11605/FPRO_11606/FPRO_03336/FPRO_01468/FPRO_07698/FPRO_07711/FPRO_03105/FPRO_09411/FPRO_06109/FPRO_09324/FPRO_04719/FPRO_10853/FPRO_03165/FPRO_01063/FPRO_14473/FPRO_01540/FPRO_13221/FPRO_00754	18
CC	GO:0031304	intrinsic component of mitochondrial inner membrane	13/866	33/3758	0.0256527	0.227027	0.209947	FPRO_03594/FPRO_09459/FPRO_02447/FPRO_06283/FPRO_05063/FPRO_02677/FPRO_03361/FPRO_11832/FPRO_04774/FPRO_01370/FPRO_03235/FPRO_00370/FPRO_01589	13
BP	GO:0006865	amino acid transport	19/897	53/3903	0.0225545	0.23868	0.219112	FPRO_00223/FPRO_07088/FPRO_01002/FPRO_07605/FPRO_04144/FPRO_15345/FPRO_03101/FPRO_03217/FPRO_12924/FPRO_11123/FPRO_01661/FPRO_15066/FPRO_15375/FPRO_04588/FPRO_00555/FPRO_10679/FPRO_06640/FPRO_11603/FPRO_09402	19
BP	GO:0000972	transcription-dependent tethering of RNA polymerase II gene DNA at nuclear periphery	6/897	11/3903	0.0228625	0.23868	0.219112	FPRO_02933/FPRO_09503/FPRO_07724/FPRO_08074/FPRO_00395/FPRO_02777	6
BP	GO:0006658	phosphatidylserine metabolic process	6/897	11/3903	0.0228625	0.23868	0.219112	FPRO_05805/FPRO_15017/FPRO_06318/FPRO_11832/FPRO_04545/FPRO_11680	6
BP	GO:0006721	terpenoid metabolic process	6/897	11/3903	0.0228625	0.23868	0.219112	FPRO_05777/FPRO_03366/FPRO_07922/FPRO_03278/FPRO_03521/FPRO_04857	6
BP	GO:0043388	positive regulation of DNA binding	6/897	11/3903	0.0228625	0.23868	0.219112	FPRO_04827/FPRO_01114/FPRO_01020/FPRO_02586/FPRO_11870/FPRO_02777	6
BP	GO:0071396	cellular response to lipid	10/897	23/3903	0.0231841	0.239555	0.219916	FPRO_04421/FPRO_15682/FPRO_05057/FPRO_00592/FPRO_12785/FPRO_11056/FPRO_01372/FPRO_05789/FPRO_05887/FPRO_00518	10
BP	GO:0030447	filamentous growth	59/897	203/3903	0.0231866	0.239555	0.219916	FPRO_06401/FPRO_04421/FPRO_02568/FPRO_13459/FPRO_11655/FPRO_05057/FPRO_05045/FPRO_04151/FPRO_09700/FPRO_05082/FPRO_01002/FPRO_00592/FPRO_10727/FPRO_05941/FPRO_15453/FPRO_04981/FPRO_06253/FPRO_11293/FPRO_04924/FPRO_02390/FPRO_08456/FPRO_13354/FPRO_04267/FPRO_00750/FPRO_07982/FPRO_00962/FPRO_04355/FPRO_15322/FPRO_10574/FPRO_07677/FPRO_03937/FPRO_11205/FPRO_11832/FPRO_02640/FPRO_08143/FPRO_00931/FPR…	59
CC	GO:0031305	integral component of mitochondrial inner membrane	12/866	30/3758	0.0278327	0.240312	0.222233	FPRO_03594/FPRO_09459/FPRO_02447/FPRO_06283/FPRO_05063/FPRO_03361/FPRO_11832/FPRO_04774/FPRO_01370/FPRO_03235/FPRO_00370/FPRO_01589	12
BP	GO:0055080	cation homeostasis	46/897	153/3903	0.0236743	0.243332	0.223383	FPRO_15682/FPRO_03170/FPRO_09226/FPRO_05045/FPRO_01028/FPRO_05865/FPRO_13463/FPRO_06531/FPRO_09879/FPRO_06339/FPRO_08673/FPRO_03676/FPRO_11055/FPRO_01086/FPRO_11605/FPRO_11606/FPRO_13037/FPRO_02896/FPRO_10745/FPRO_13135/FPRO_12967/FPRO_09015/FPRO_12785/FPRO_03195/FPRO_04259/FPRO_10387/FPRO_13357/FPRO_02700/FPRO_01387/FPRO_04955/FPRO_14247/FPRO_00802/FPRO_04826/FPRO_04613/FPRO_14263/FPRO_06261/FPR…	46
BP	GO:0046470	phosphatidylcholine metabolic process	9/897	20/3903	0.0241844	0.245523	0.225394	FPRO_05805/FPRO_15017/FPRO_10632/FPRO_07694/FPRO_06394/FPRO_11832/FPRO_11871/FPRO_04545/FPRO_11680	9
BP	GO:0006023	aminoglycan biosynthetic process	7/897	14/3903	0.0244733	0.245523	0.225394	FPRO_00819/FPRO_00750/FPRO_15322/FPRO_07677/FPRO_13383/FPRO_08257/FPRO_00670	7
BP	GO:0006031	chitin biosynthetic process	7/897	14/3903	0.0244733	0.245523	0.225394	FPRO_00819/FPRO_00750/FPRO_15322/FPRO_07677/FPRO_13383/FPRO_08257/FPRO_00670	7
BP	GO:1901073	glucosamine-containing compound biosynthetic process	7/897	14/3903	0.0244733	0.245523	0.225394	FPRO_00819/FPRO_00750/FPRO_15322/FPRO_07677/FPRO_13383/FPRO_08257/FPRO_00670	7
BP	GO:0006820	anion transport	55/897	188/3903	0.0245031	0.245523	0.225394	FPRO_00223/FPRO_14174/FPRO_05805/FPRO_15682/FPRO_15412/FPRO_06607/FPRO_08071/FPRO_00501/FPRO_07088/FPRO_06531/FPRO_01002/FPRO_04054/FPRO_07605/FPRO_03594/FPRO_04144/FPRO_07710/FPRO_11605/FPRO_07694/FPRO_04267/FPRO_00388/FPRO_12785/FPRO_13638/FPRO_15345/FPRO_09499/FPRO_06394/FPRO_09347/FPRO_00955/FPRO_09599/FPRO_09283/FPRO_04642/FPRO_03101/FPRO_03217/FPRO_04176/FPRO_04826/FPRO_02941/FPRO_12924/FPR…	55
BP	GO:0097306	cellular response to alcohol	8/897	17/3903	0.0247268	0.246527	0.226316	FPRO_04421/FPRO_05057/FPRO_00592/FPRO_11056/FPRO_01372/FPRO_05789/FPRO_05887/FPRO_00518	8
BP	GO:0003333	amino acid transmembrane transport	18/897	50/3903	0.0249205	0.246895	0.226653	FPRO_00223/FPRO_07088/FPRO_01002/FPRO_07605/FPRO_04144/FPRO_15345/FPRO_03101/FPRO_03217/FPRO_12924/FPRO_11123/FPRO_15066/FPRO_15375/FPRO_04588/FPRO_00555/FPRO_10679/FPRO_06640/FPRO_11603/FPRO_09402	18
BP	GO:0043207	response to external biotic stimulus	13/897	33/3903	0.0251352	0.246895	0.226653	FPRO_06401/FPRO_05057/FPRO_11021/FPRO_05045/FPRO_13463/FPRO_04151/FPRO_09700/FPRO_00592/FPRO_11293/FPRO_14280/FPRO_08211/FPRO_01372/FPRO_01733	13
BP	GO:0051707	response to other organism	13/897	33/3903	0.0251352	0.246895	0.226653	FPRO_06401/FPRO_05057/FPRO_11021/FPRO_05045/FPRO_13463/FPRO_04151/FPRO_09700/FPRO_00592/FPRO_11293/FPRO_14280/FPRO_08211/FPRO_01372/FPRO_01733	13
MF	GO:0046943	carboxylic acid transmembrane transporter activity	28/780	76/3372	0.00448547	0.255672	0.250917	FPRO_00223/FPRO_15412/FPRO_06607/FPRO_00501/FPRO_07088/FPRO_01002/FPRO_04054/FPRO_07605/FPRO_04144/FPRO_07710/FPRO_13638/FPRO_15345/FPRO_09499/FPRO_09347/FPRO_03217/FPRO_12924/FPRO_04351/FPRO_07716/FPRO_11123/FPRO_10849/FPRO_15066/FPRO_02107/FPRO_04588/FPRO_00555/FPRO_10679/FPRO_06640/FPRO_11603/FPRO_09402	28
BP	GO:0046467	membrane lipid biosynthetic process	23/897	68/3903	0.0263198	0.257263	0.236172	FPRO_13459/FPRO_06098/FPRO_08494/FPRO_04342/FPRO_13293/FPRO_10022/FPRO_10708/FPRO_04130/FPRO_03632/FPRO_02559/FPRO_06400/FPRO_04926/FPRO_07626/FPRO_11988/FPRO_07847/FPRO_13265/FPRO_00814/FPRO_05963/FPRO_10657/FPRO_01607/FPRO_13298/FPRO_10570/FPRO_05919	23
BP	GO:0071236	cellular response to antibiotic	15/897	40/3903	0.0268446	0.261113	0.239706	FPRO_04421/FPRO_05057/FPRO_00592/FPRO_05941/FPRO_13037/FPRO_14612/FPRO_11056/FPRO_01372/FPRO_05789/FPRO_03158/FPRO_05887/FPRO_04612/FPRO_00518/FPRO_05233/FPRO_15419	15
BP	GO:0015804	neutral amino acid transport	12/897	30/3903	0.0273019	0.262995	0.241434	FPRO_01002/FPRO_03101/FPRO_03217/FPRO_12924/FPRO_01661/FPRO_15066/FPRO_15375/FPRO_04588/FPRO_00555/FPRO_10679/FPRO_11603/FPRO_09402	12
BP	GO:0052173	response to defenses of other organism	12/897	30/3903	0.0273019	0.262995	0.241434	FPRO_06401/FPRO_05057/FPRO_11021/FPRO_05045/FPRO_13463/FPRO_04151/FPRO_00592/FPRO_11293/FPRO_14280/FPRO_08211/FPRO_01372/FPRO_01733	12
BP	GO:0071852	fungal-type cell wall organization or biogenesis	44/897	147/3903	0.0285783	0.272656	0.250303	FPRO_11978/FPRO_09689/FPRO_04742/FPRO_02236/FPRO_09770/FPRO_09483/FPRO_08071/FPRO_05045/FPRO_06856/FPRO_00592/FPRO_10727/FPRO_15453/FPRO_06253/FPRO_10022/FPRO_11293/FPRO_01309/FPRO_07756/FPRO_06318/FPRO_00750/FPRO_15322/FPRO_13332/FPRO_10574/FPRO_10509/FPRO_07677/FPRO_05864/FPRO_08143/FPRO_03182/FPRO_09727/FPRO_09394/FPRO_05887/FPRO_13383/FPRO_09271/FPRO_10910/FPRO_10709/FPRO_15367/FPRO_08437/FPR…	44
BP	GO:0098662	inorganic cation transmembrane transport	44/897	147/3903	0.0285783	0.272656	0.250303	FPRO_15412/FPRO_06607/FPRO_09226/FPRO_11655/FPRO_05865/FPRO_06531/FPRO_09879/FPRO_08673/FPRO_12998/FPRO_04054/FPRO_03676/FPRO_15689/FPRO_01086/FPRO_11605/FPRO_13829/FPRO_11606/FPRO_05939/FPRO_02447/FPRO_10745/FPRO_13135/FPRO_09015/FPRO_04259/FPRO_04343/FPRO_04155/FPRO_10387/FPRO_13930/FPRO_02700/FPRO_09283/FPRO_04955/FPRO_08384/FPRO_14247/FPRO_00802/FPRO_04613/FPRO_07716/FPRO_14260/FPRO_07847/FPR…	44
BP	GO:0006094	gluconeogenesis	11/897	27/3903	0.0295378	0.276518	0.253848	FPRO_08120/FPRO_05057/FPRO_05699/FPRO_00592/FPRO_13436/FPRO_14612/FPRO_08211/FPRO_08143/FPRO_04538/FPRO_07915/FPRO_06193	11
BP	GO:0019319	hexose biosynthetic process	11/897	27/3903	0.0295378	0.276518	0.253848	FPRO_08120/FPRO_05057/FPRO_05699/FPRO_00592/FPRO_13436/FPRO_14612/FPRO_08211/FPRO_08143/FPRO_04538/FPRO_07915/FPRO_06193	11
BP	GO:0052200	response to host defenses	11/897	27/3903	0.0295378	0.276518	0.253848	FPRO_06401/FPRO_05057/FPRO_11021/FPRO_05045/FPRO_13463/FPRO_04151/FPRO_00592/FPRO_14280/FPRO_08211/FPRO_01372/FPRO_01733	11
BP	GO:0075136	response to host	11/897	27/3903	0.0295378	0.276518	0.253848	FPRO_06401/FPRO_05057/FPRO_11021/FPRO_05045/FPRO_13463/FPRO_04151/FPRO_00592/FPRO_14280/FPRO_08211/FPRO_01372/FPRO_01733	11
BP	GO:0000096	sulfur amino acid metabolic process	16/897	44/3903	0.0304288	0.283528	0.260284	FPRO_11021/FPRO_09182/FPRO_10632/FPRO_08458/FPRO_07727/FPRO_10599/FPRO_09489/FPRO_08393/FPRO_00611/FPRO_03390/FPRO_00772/FPRO_03120/FPRO_04474/FPRO_01204/FPRO_10929/FPRO_11834	16
BP	GO:0044282	small molecule catabolic process	49/897	167/3903	0.0309337	0.286892	0.263372	FPRO_13261/FPRO_05057/FPRO_08943/FPRO_10545/FPRO_05699/FPRO_04151/FPRO_03149/FPRO_00592/FPRO_10632/FPRO_01513/FPRO_00812/FPRO_13436/FPRO_10599/FPRO_08361/FPRO_04924/FPRO_01140/FPRO_09930/FPRO_03195/FPRO_03103/FPRO_11949/FPRO_01751/FPRO_06340/FPRO_08360/FPRO_08211/FPRO_11056/FPRO_02813/FPRO_09769/FPRO_03679/FPRO_13282/FPRO_14968/FPRO_15504/FPRO_09324/FPRO_03129/FPRO_10707/FPRO_03141/FPRO_00921/FPR…	49
BP	GO:0044262	cellular carbohydrate metabolic process	50/897	171/3903	0.0313298	0.288038	0.264424	FPRO_02384/FPRO_02236/FPRO_08120/FPRO_05057/FPRO_08103/FPRO_14272/FPRO_05941/FPRO_12202/FPRO_15254/FPRO_00819/FPRO_04924/FPRO_02362/FPRO_01140/FPRO_00750/FPRO_02456/FPRO_03195/FPRO_15322/FPRO_13332/FPRO_04819/FPRO_11949/FPRO_14612/FPRO_07677/FPRO_05864/FPRO_10778/FPRO_02640/FPRO_13941/FPRO_08143/FPRO_04672/FPRO_13059/FPRO_03182/FPRO_09769/FPRO_03679/FPRO_04545/FPRO_13383/FPRO_09310/FPRO_12250/FPR…	50
BP	GO:0006022	aminoglycan metabolic process	10/897	24/3903	0.0317796	0.288038	0.264424	FPRO_00841/FPRO_02236/FPRO_14055/FPRO_00819/FPRO_00750/FPRO_15322/FPRO_07677/FPRO_13383/FPRO_08257/FPRO_00670	10
BP	GO:0006030	chitin metabolic process	10/897	24/3903	0.0317796	0.288038	0.264424	FPRO_00841/FPRO_02236/FPRO_14055/FPRO_00819/FPRO_00750/FPRO_15322/FPRO_07677/FPRO_13383/FPRO_08257/FPRO_00670	10
BP	GO:0007064	mitotic sister chromatid cohesion	10/897	24/3903	0.0317796	0.288038	0.264424	FPRO_04827/FPRO_11070/FPRO_01114/FPRO_11870/FPRO_09138/FPRO_05043/FPRO_13052/FPRO_12044/FPRO_02777/FPRO_05958	10
BP	GO:0009166	nucleotide catabolic process	10/897	24/3903	0.0317796	0.288038	0.264424	FPRO_05057/FPRO_05699/FPRO_04151/FPRO_02532/FPRO_00592/FPRO_13436/FPRO_03195/FPRO_08211/FPRO_09769/FPRO_06193	10
CC	GO:0005758	mitochondrial intermembrane space	17/866	48/3758	0.0345945	0.291582	0.269646	FPRO_03149/FPRO_06339/FPRO_01395/FPRO_06100/FPRO_12807/FPRO_07694/FPRO_05863/FPRO_09542/FPRO_00701/FPRO_05789/FPRO_01068/FPRO_07874/FPRO_10988/FPRO_03165/FPRO_01063/FPRO_02993/FPRO_01628	17
BP	GO:0055082	cellular chemical homeostasis	54/897	187/3903	0.0326929	0.294975	0.270793	FPRO_02384/FPRO_14009/FPRO_15682/FPRO_03170/FPRO_00589/FPRO_09226/FPRO_05045/FPRO_01028/FPRO_05865/FPRO_13463/FPRO_06531/FPRO_09879/FPRO_06339/FPRO_08673/FPRO_03676/FPRO_11055/FPRO_01086/FPRO_11605/FPRO_11606/FPRO_13037/FPRO_02896/FPRO_10745/FPRO_13135/FPRO_12967/FPRO_09015/FPRO_12785/FPRO_03195/FPRO_04259/FPRO_02559/FPRO_10387/FPRO_13357/FPRO_02700/FPRO_03022/FPRO_01387/FPRO_09769/FPRO_04955/FPR…	54
BP	GO:0098660	inorganic ion transmembrane transport	48/897	164/3903	0.0338736	0.299258	0.274724	FPRO_15412/FPRO_06607/FPRO_09226/FPRO_11655/FPRO_05865/FPRO_06531/FPRO_09879/FPRO_08673/FPRO_12998/FPRO_04054/FPRO_03676/FPRO_03594/FPRO_15689/FPRO_01086/FPRO_11605/FPRO_13829/FPRO_11606/FPRO_05939/FPRO_02447/FPRO_10745/FPRO_13135/FPRO_09015/FPRO_04259/FPRO_04343/FPRO_04155/FPRO_10387/FPRO_13930/FPRO_00955/FPRO_02700/FPRO_09283/FPRO_04955/FPRO_08384/FPRO_14247/FPRO_00802/FPRO_04826/FPRO_04613/FPR…	48
BP	GO:0006639	acylglycerol metabolic process	9/897	21/3903	0.033918	0.299258	0.274724	FPRO_01104/FPRO_06323/FPRO_00589/FPRO_10632/FPRO_05122/FPRO_06496/FPRO_11700/FPRO_04849/FPRO_14471	9
BP	GO:0006641	triglyceride metabolic process	9/897	21/3903	0.033918	0.299258	0.274724	FPRO_01104/FPRO_06323/FPRO_00589/FPRO_10632/FPRO_05122/FPRO_06496/FPRO_11700/FPRO_04849/FPRO_14471	9
BP	GO:0009081	branched-chain amino acid metabolic process	9/897	21/3903	0.033918	0.299258	0.274724	FPRO_13205/FPRO_07727/FPRO_10963/FPRO_01751/FPRO_11699/FPRO_05139/FPRO_07903/FPRO_06219/FPRO_03141	9
BP	GO:0070784	regulation of growth of unicellular organism as a thread of attached cells	9/897	21/3903	0.033918	0.299258	0.274724	FPRO_02568/FPRO_09700/FPRO_04981/FPRO_04924/FPRO_02390/FPRO_00962/FPRO_04672/FPRO_13305/FPRO_09694	9
BP	GO:0022904	respiratory electron transport chain	12/897	31/3903	0.0355127	0.311417	0.285886	FPRO_04343/FPRO_01468/FPRO_07698/FPRO_07711/FPRO_08162/FPRO_04719/FPRO_13262/FPRO_03165/FPRO_01063/FPRO_01540/FPRO_10872/FPRO_00754	12
BP	GO:0006037	cell wall chitin metabolic process	8/897	18/3903	0.0357645	0.311417	0.285886	FPRO_02236/FPRO_00819/FPRO_00750/FPRO_15322/FPRO_07677/FPRO_13383/FPRO_08257/FPRO_00670	8
BP	GO:0033212	iron import into cell	8/897	18/3903	0.0357645	0.311417	0.285886	FPRO_09226/FPRO_06531/FPRO_01086/FPRO_11605/FPRO_11606/FPRO_02700/FPRO_14247/FPRO_14260	8
BP	GO:0010106	cellular response to iron ion starvation	7/897	15/3903	0.0369901	0.312641	0.28701	FPRO_05045/FPRO_01086/FPRO_13037/FPRO_02896/FPRO_14263/FPRO_06261/FPRO_05233	7
BP	GO:0051099	positive regulation of binding	7/897	15/3903	0.0369901	0.312641	0.28701	FPRO_04827/FPRO_10022/FPRO_01114/FPRO_01020/FPRO_02586/FPRO_11870/FPRO_02777	7
BP	GO:0051156	glucose 6-phosphate metabolic process	7/897	15/3903	0.0369901	0.312641	0.28701	FPRO_00664/FPRO_08391/FPRO_05699/FPRO_09723/FPRO_01140/FPRO_07963/FPRO_09769	7
BP	GO:0005991	trehalose metabolic process	6/897	12/3903	0.0370026	0.312641	0.28701	FPRO_05941/FPRO_02362/FPRO_10778/FPRO_08143/FPRO_00574/FPRO_01101	6
BP	GO:0006098	pentose-phosphate shunt	6/897	12/3903	0.0370026	0.312641	0.28701	FPRO_00664/FPRO_08391/FPRO_05699/FPRO_09723/FPRO_01140/FPRO_07963	6
BP	GO:0006113	fermentation	6/897	12/3903	0.0370026	0.312641	0.28701	FPRO_00079/FPRO_06340/FPRO_11056/FPRO_09769/FPRO_13262/FPRO_03073	6
BP	GO:0032042	mitochondrial DNA metabolic process	6/897	12/3903	0.0370026	0.312641	0.28701	FPRO_09159/FPRO_10385/FPRO_10729/FPRO_04812/FPRO_09295/FPRO_10735	6
BP	GO:0044106	cellular amine metabolic process	16/897	45/3903	0.0374803	0.314016	0.288272	FPRO_13261/FPRO_13202/FPRO_06721/FPRO_06590/FPRO_03103/FPRO_07677/FPRO_06340/FPRO_03361/FPRO_04917/FPRO_00931/FPRO_04555/FPRO_10926/FPRO_03129/FPRO_05788/FPRO_09694/FPRO_14257	16
BP	GO:0046677	response to antibiotic	16/897	45/3903	0.0374803	0.314016	0.288272	FPRO_04421/FPRO_00664/FPRO_05057/FPRO_00592/FPRO_05941/FPRO_13037/FPRO_14612/FPRO_11056/FPRO_01372/FPRO_05789/FPRO_03158/FPRO_05887/FPRO_04612/FPRO_00518/FPRO_05233/FPRO_15419	16
BP	GO:0042594	response to starvation	42/897	142/3903	0.0384861	0.321093	0.294769	FPRO_06401/FPRO_02568/FPRO_15412/FPRO_05057/FPRO_05045/FPRO_04151/FPRO_09700/FPRO_02532/FPRO_04054/FPRO_00812/FPRO_03676/FPRO_01086/FPRO_10022/FPRO_13037/FPRO_02896/FPRO_04924/FPRO_04267/FPRO_10387/FPRO_03937/FPRO_01132/FPRO_11832/FPRO_08143/FPRO_00931/FPRO_10598/FPRO_06152/FPRO_09441/FPRO_08135/FPRO_04545/FPRO_03217/FPRO_06403/FPRO_14263/FPRO_06261/FPRO_09691/FPRO_04271/FPRO_01661/FPRO_08437/FPR…	42
BP	GO:0006112	energy reserve metabolic process	11/897	28/3903	0.0388545	0.321476	0.295121	FPRO_04819/FPRO_10537/FPRO_02640/FPRO_13059/FPRO_09310/FPRO_12250/FPRO_03028/FPRO_00804/FPRO_11848/FPRO_01101/FPRO_05728	11
BP	GO:0006576	cellular biogenic amine metabolic process	11/897	28/3903	0.0388545	0.321476	0.295121	FPRO_13261/FPRO_13202/FPRO_06721/FPRO_06590/FPRO_03103/FPRO_06340/FPRO_03361/FPRO_04917/FPRO_04555/FPRO_10926/FPRO_05788	11
BP	GO:0006302	double-strand break repair	33/897	108/3903	0.0404958	0.333672	0.306316	FPRO_15682/FPRO_02525/FPRO_05837/FPRO_11862/FPRO_11211/FPRO_04924/FPRO_09440/FPRO_09539/FPRO_12785/FPRO_11070/FPRO_10574/FPRO_11799/FPRO_01114/FPRO_03022/FPRO_10953/FPRO_04672/FPRO_09503/FPRO_08263/FPRO_03427/FPRO_08259/FPRO_11870/FPRO_10984/FPRO_10729/FPRO_15929/FPRO_07858/FPRO_13123/FPRO_01165/FPRO_02777/FPRO_03133/FPRO_00954/FPRO_00797/FPRO_05958/FPRO_04265	33
BP	GO:0006006	glucose metabolic process	17/897	49/3903	0.0410685	0.336998	0.30937	FPRO_08120/FPRO_05057/FPRO_05699/FPRO_04151/FPRO_00592/FPRO_13436/FPRO_03195/FPRO_14612/FPRO_06340/FPRO_08211/FPRO_11056/FPRO_08143/FPRO_04538/FPRO_09769/FPRO_13262/FPRO_07915/FPRO_06193	17
BP	GO:0006855	xenobiotic transmembrane transport	23/897	71/3903	0.0429074	0.350645	0.321898	FPRO_15682/FPRO_06607/FPRO_00501/FPRO_07088/FPRO_01002/FPRO_12998/FPRO_15689/FPRO_04144/FPRO_12785/FPRO_13638/FPRO_15345/FPRO_13015/FPRO_03217/FPRO_04826/FPRO_04351/FPRO_07716/FPRO_15367/FPRO_15066/FPRO_04588/FPRO_00555/FPRO_10679/FPRO_11603/FPRO_09402	23
BP	GO:0006040	amino sugar metabolic process	12/897	32/3903	0.0453305	0.365637	0.335661	FPRO_00841/FPRO_01461/FPRO_02236/FPRO_14055/FPRO_00819/FPRO_00750/FPRO_15322/FPRO_07677/FPRO_13383/FPRO_09100/FPRO_08257/FPRO_00670	12
BP	GO:0015807	L-amino acid transport	12/897	32/3903	0.0453305	0.365637	0.335661	FPRO_07088/FPRO_01002/FPRO_04144/FPRO_15345/FPRO_03101/FPRO_03217/FPRO_15066/FPRO_04588/FPRO_00555/FPRO_10679/FPRO_11603/FPRO_09402	12
BP	GO:1902475	L-alpha-amino acid transmembrane transport	12/897	32/3903	0.0453305	0.365637	0.335661	FPRO_07088/FPRO_01002/FPRO_04144/FPRO_15345/FPRO_03101/FPRO_03217/FPRO_15066/FPRO_04588/FPRO_00555/FPRO_10679/FPRO_11603/FPRO_09402	12
BP	GO:0033692	cellular polysaccharide biosynthetic process	16/897	46/3903	0.0456423	0.365637	0.335661	FPRO_15254/FPRO_00819/FPRO_00750/FPRO_15322/FPRO_13332/FPRO_04819/FPRO_07677/FPRO_05864/FPRO_13059/FPRO_03182/FPRO_13383/FPRO_10709/FPRO_08257/FPRO_00670/FPRO_11848/FPRO_01101	16
BP	GO:0044419	biological process involved in interspecies interaction between organisms	39/897	132/3903	0.0456588	0.365637	0.335661	FPRO_06401/FPRO_13459/FPRO_05057/FPRO_11021/FPRO_08071/FPRO_05045/FPRO_13463/FPRO_04151/FPRO_09700/FPRO_15017/FPRO_00592/FPRO_12998/FPRO_05941/FPRO_06253/FPRO_13037/FPRO_11293/FPRO_10574/FPRO_14280/FPRO_08211/FPRO_01372/FPRO_03937/FPRO_11205/FPRO_01020/FPRO_02640/FPRO_00931/FPRO_06152/FPRO_01733/FPRO_05887/FPRO_04545/FPRO_10705/FPRO_11930/FPRO_04613/FPRO_09691/FPRO_05899/FPRO_08437/FPRO_11680/FPR…	39
BP	GO:0006638	neutral lipid metabolic process	9/897	22/3903	0.0460447	0.365789	0.335801	FPRO_01104/FPRO_06323/FPRO_00589/FPRO_10632/FPRO_05122/FPRO_06496/FPRO_11700/FPRO_04849/FPRO_14471	9
BP	GO:0006739	NADP metabolic process	9/897	22/3903	0.0460447	0.365789	0.335801	FPRO_00664/FPRO_08391/FPRO_05699/FPRO_09723/FPRO_01513/FPRO_01140/FPRO_07963/FPRO_04442/FPRO_11681	9
MF	GO:0016746	acyltransferase activity	36/780	107/3372	0.00773627	0.366432	0.359617	FPRO_01104/FPRO_06323/FPRO_00589/FPRO_11079/FPRO_03149/FPRO_03366/FPRO_06721/FPRO_00592/FPRO_04342/FPRO_04981/FPRO_13293/FPRO_01020/FPRO_05125/FPRO_05139/FPRO_06400/FPRO_08179/FPRO_04969/FPRO_13177/FPRO_11747/FPRO_03466/FPRO_11871/FPRO_09100/FPRO_11700/FPRO_00084/FPRO_02722/FPRO_04849/FPRO_13123/FPRO_14251/FPRO_09138/FPRO_06324/FPRO_02082/FPRO_01607/FPRO_10872/FPRO_03948/FPRO_02464/FPRO_13221	36
MF	GO:0005342	organic acid transmembrane transporter activity	28/780	79/3372	0.00826538	0.366432	0.359617	FPRO_00223/FPRO_15412/FPRO_06607/FPRO_00501/FPRO_07088/FPRO_01002/FPRO_04054/FPRO_07605/FPRO_04144/FPRO_07710/FPRO_13638/FPRO_15345/FPRO_09499/FPRO_09347/FPRO_03217/FPRO_12924/FPRO_04351/FPRO_07716/FPRO_11123/FPRO_10849/FPRO_15066/FPRO_02107/FPRO_04588/FPRO_00555/FPRO_10679/FPRO_06640/FPRO_11603/FPRO_09402	28
BP	GO:1901700	response to oxygen-containing compound	34/897	113/3903	0.0467513	0.369929	0.339601	FPRO_14009/FPRO_04421/FPRO_00664/FPRO_08499/FPRO_05057/FPRO_09700/FPRO_00592/FPRO_05941/FPRO_04981/FPRO_12807/FPRO_13037/FPRO_13354/FPRO_00701/FPRO_03195/FPRO_14612/FPRO_11056/FPRO_01372/FPRO_10778/FPRO_03022/FPRO_08143/FPRO_05789/FPRO_03158/FPRO_03101/FPRO_05887/FPRO_07874/FPRO_13100/FPRO_04612/FPRO_04354/FPRO_00518/FPRO_05233/FPRO_00437/FPRO_10534/FPRO_06705/FPRO_15419	34
BP	GO:0019725	cellular homeostasis	60/897	215/3903	0.0484034	0.381488	0.350212	FPRO_02384/FPRO_14009/FPRO_15682/FPRO_03170/FPRO_00589/FPRO_09226/FPRO_05045/FPRO_01028/FPRO_05865/FPRO_13463/FPRO_06531/FPRO_09879/FPRO_06339/FPRO_08673/FPRO_09673/FPRO_03676/FPRO_11055/FPRO_01086/FPRO_11605/FPRO_11606/FPRO_13037/FPRO_02896/FPRO_10745/FPRO_13135/FPRO_12967/FPRO_09015/FPRO_12785/FPRO_03195/FPRO_05980/FPRO_04259/FPRO_02559/FPRO_14612/FPRO_10387/FPRO_13357/FPRO_02700/FPRO_03022/FPR…	60
CC	GO:1990351	transporter complex	14/866	39/3758	0.0470437	0.38729	0.358154	FPRO_11605/FPRO_11606/FPRO_03336/FPRO_01468/FPRO_07698/FPRO_07711/FPRO_03105/FPRO_09411/FPRO_04719/FPRO_03165/FPRO_01063/FPRO_01540/FPRO_01628/FPRO_00754	14
BP	GO:0097305	response to alcohol	8/897	19/3903	0.0496931	0.389714	0.357764	FPRO_04421/FPRO_05057/FPRO_00592/FPRO_11056/FPRO_01372/FPRO_05789/FPRO_05887/FPRO_00518	8
BP	GO:0070783	growth of unicellular organism as a thread of attached cells	23/897	72/3903	0.0498511	0.389714	0.357764	FPRO_04421/FPRO_02568/FPRO_11655/FPRO_09700/FPRO_10727/FPRO_15453/FPRO_04981/FPRO_04924/FPRO_02390/FPRO_13354/FPRO_00962/FPRO_04355/FPRO_08143/FPRO_00931/FPRO_04672/FPRO_04545/FPRO_09271/FPRO_09518/FPRO_04271/FPRO_13305/FPRO_00487/FPRO_10534/FPRO_09694	23
BP	GO:0009119	ribonucleoside metabolic process	11/897	29/3903	0.0500335	0.389714	0.357764	FPRO_10632/FPRO_05863/FPRO_06470/FPRO_02677/FPRO_02813/FPRO_05844/FPRO_08387/FPRO_06109/FPRO_02298/FPRO_10853/FPRO_00921	11
BP	GO:0000302	response to reactive oxygen species	15/897	43/3903	0.0507634	0.393861	0.361571	FPRO_00664/FPRO_08499/FPRO_05941/FPRO_04981/FPRO_13037/FPRO_00701/FPRO_14612/FPRO_10778/FPRO_08143/FPRO_03158/FPRO_07874/FPRO_04612/FPRO_05233/FPRO_06705/FPRO_15419	15
BP	GO:0040007	growth	65/897	236/3903	0.0527267	0.406674	0.373334	FPRO_06401/FPRO_04421/FPRO_02568/FPRO_13459/FPRO_11655/FPRO_05057/FPRO_05045/FPRO_04151/FPRO_09700/FPRO_05082/FPRO_01002/FPRO_00592/FPRO_10727/FPRO_05941/FPRO_15453/FPRO_04981/FPRO_06253/FPRO_10022/FPRO_11293/FPRO_04924/FPRO_02390/FPRO_08456/FPRO_13354/FPRO_04267/FPRO_00750/FPRO_05863/FPRO_07982/FPRO_02456/FPRO_00962/FPRO_04355/FPRO_15322/FPRO_10574/FPRO_07677/FPRO_03937/FPRO_11205/FPRO_11832/FPR…	65
BP	GO:0000041	transition metal ion transport	18/897	54/3903	0.0528228	0.406674	0.373334	FPRO_09226/FPRO_06531/FPRO_09879/FPRO_11055/FPRO_01086/FPRO_11605/FPRO_11606/FPRO_04924/FPRO_10745/FPRO_02700/FPRO_04672/FPRO_01068/FPRO_14247/FPRO_14260/FPRO_04218/FPRO_06193/FPRO_03585/FPRO_15073	18
BP	GO:0019321	pentose metabolic process	7/897	16/3903	0.0530761	0.407053	0.373681	FPRO_00664/FPRO_08391/FPRO_09723/FPRO_12202/FPRO_01140/FPRO_03679/FPRO_06991	7
BP	GO:0000271	polysaccharide biosynthetic process	16/897	47/3903	0.0549871	0.408302	0.374828	FPRO_15254/FPRO_00819/FPRO_00750/FPRO_15322/FPRO_13332/FPRO_04819/FPRO_07677/FPRO_05864/FPRO_13059/FPRO_03182/FPRO_13383/FPRO_10709/FPRO_08257/FPRO_00670/FPRO_11848/FPRO_01101	16
BP	GO:1901606	alpha-amino acid catabolic process	16/897	47/3903	0.0549871	0.408302	0.374828	FPRO_13261/FPRO_08943/FPRO_10632/FPRO_00812/FPRO_10599/FPRO_08361/FPRO_01751/FPRO_06340/FPRO_08360/FPRO_11056/FPRO_15504/FPRO_09324/FPRO_10707/FPRO_10929/FPRO_02935/FPRO_09694	16
BP	GO:0019184	nonribosomal peptide biosynthetic process	6/897	13/3903	0.0556921	0.408302	0.374828	FPRO_13037/FPRO_02896/FPRO_04967/FPRO_14261/FPRO_14263/FPRO_13036	6
BP	GO:0034085	establishment of sister chromatid cohesion	6/897	13/3903	0.0556921	0.408302	0.374828	FPRO_11070/FPRO_01114/FPRO_11870/FPRO_09138/FPRO_12044/FPRO_02777	6
BP	GO:0048017	inositol lipid-mediated signaling	6/897	13/3903	0.0556921	0.408302	0.374828	FPRO_10827/FPRO_08124/FPRO_02968/FPRO_08437/FPRO_03120/FPRO_09466	6
BP	GO:1990414	replication-born double-strand break repair via sister chromatid exchange	6/897	13/3903	0.0556921	0.408302	0.374828	FPRO_15682/FPRO_12785/FPRO_10574/FPRO_01114/FPRO_01165/FPRO_02777	6
BP	GO:0030148	sphingolipid biosynthetic process	14/897	40/3903	0.0565065	0.408302	0.374828	FPRO_13459/FPRO_06098/FPRO_08494/FPRO_04342/FPRO_13293/FPRO_10022/FPRO_02559/FPRO_06400/FPRO_04926/FPRO_07626/FPRO_07847/FPRO_13265/FPRO_10570/FPRO_05919	14
BP	GO:0002684	positive regulation of immune system process	5/897	10/3903	0.0565152	0.408302	0.374828	FPRO_05045/FPRO_13463/FPRO_09700/FPRO_14280/FPRO_01733	5
BP	GO:0006547	histidine metabolic process	5/897	10/3903	0.0565152	0.408302	0.374828	FPRO_01466/FPRO_10599/FPRO_04917/FPRO_00573/FPRO_10611	5
BP	GO:0006955	immune response	5/897	10/3903	0.0565152	0.408302	0.374828	FPRO_13463/FPRO_09700/FPRO_14280/FPRO_01372/FPRO_01733	5
BP	GO:0016114	terpenoid biosynthetic process	5/897	10/3903	0.0565152	0.408302	0.374828	FPRO_05777/FPRO_03366/FPRO_07922/FPRO_03521/FPRO_04857	5
BP	GO:0042726	flavin-containing compound metabolic process	5/897	10/3903	0.0565152	0.408302	0.374828	FPRO_09542/FPRO_03469/FPRO_09619/FPRO_07588/FPRO_00821	5
BP	GO:0043090	amino acid import	5/897	10/3903	0.0565152	0.408302	0.374828	FPRO_03217/FPRO_04588/FPRO_00555/FPRO_10679/FPRO_09402	5
BP	GO:0052803	imidazole-containing compound metabolic process	5/897	10/3903	0.0565152	0.408302	0.374828	FPRO_01466/FPRO_10599/FPRO_04917/FPRO_00573/FPRO_10611	5
BP	GO:0071072	negative regulation of phospholipid biosynthetic process	5/897	10/3903	0.0565152	0.408302	0.374828	FPRO_05805/FPRO_06318/FPRO_06394/FPRO_10381/FPRO_07945	5
BP	GO:1903726	negative regulation of phospholipid metabolic process	5/897	10/3903	0.0565152	0.408302	0.374828	FPRO_05805/FPRO_06318/FPRO_06394/FPRO_10381/FPRO_07945	5
MF	GO:0016853	isomerase activity	23/780	63/3372	0.0108216	0.420654	0.41283	FPRO_08391/FPRO_05057/FPRO_08943/FPRO_10545/FPRO_05699/FPRO_08103/FPRO_05837/FPRO_04381/FPRO_00235/FPRO_15512/FPRO_06339/FPRO_02809/FPRO_00819/FPRO_02526/FPRO_07902/FPRO_01140/FPRO_03667/FPRO_04917/FPRO_03511/FPRO_05260/FPRO_00518/FPRO_05043/FPRO_01698	23
MF	GO:0015171	amino acid transmembrane transporter activity	16/780	40/3372	0.0123063	0.420654	0.41283	FPRO_00223/FPRO_07088/FPRO_01002/FPRO_07605/FPRO_04144/FPRO_15345/FPRO_03217/FPRO_12924/FPRO_11123/FPRO_15066/FPRO_04588/FPRO_00555/FPRO_10679/FPRO_06640/FPRO_11603/FPRO_09402	16
MF	GO:0016747	acyltransferase activity, transferring groups other than amino-acyl groups	31/780	92/3372	0.0126513	0.420654	0.41283	FPRO_01104/FPRO_06323/FPRO_00589/FPRO_03149/FPRO_06721/FPRO_04342/FPRO_04981/FPRO_13293/FPRO_01020/FPRO_05125/FPRO_06400/FPRO_08179/FPRO_04969/FPRO_13177/FPRO_11747/FPRO_03466/FPRO_11871/FPRO_09100/FPRO_11700/FPRO_00084/FPRO_02722/FPRO_13123/FPRO_14251/FPRO_09138/FPRO_06324/FPRO_02082/FPRO_01607/FPRO_10872/FPRO_03948/FPRO_02464/FPRO_13221	31
BP	GO:0098657	import into cell	45/897	158/3903	0.0594173	0.427719	0.392653	FPRO_14009/FPRO_09689/FPRO_15412/FPRO_10428/FPRO_06607/FPRO_09226/FPRO_07088/FPRO_09700/FPRO_06531/FPRO_05007/FPRO_04054/FPRO_14295/FPRO_01427/FPRO_01086/FPRO_11605/FPRO_11606/FPRO_04259/FPRO_02700/FPRO_00931/FPRO_04255/FPRO_04955/FPRO_03101/FPRO_06123/FPRO_14247/FPRO_03045/FPRO_04613/FPRO_11644/FPRO_07716/FPRO_07945/FPRO_06403/FPRO_02471/FPRO_14260/FPRO_09663/FPRO_09437/FPRO_07847/FPRO_15375/FPR…	45
BP	GO:1901701	cellular response to oxygen-containing compound	29/897	96/3903	0.0600285	0.430564	0.395265	FPRO_14009/FPRO_04421/FPRO_08499/FPRO_05057/FPRO_00592/FPRO_05941/FPRO_04981/FPRO_12807/FPRO_13037/FPRO_00701/FPRO_03195/FPRO_14612/FPRO_11056/FPRO_01372/FPRO_10778/FPRO_03022/FPRO_08143/FPRO_05789/FPRO_03158/FPRO_03101/FPRO_05887/FPRO_07874/FPRO_13100/FPRO_04612/FPRO_04354/FPRO_00518/FPRO_05233/FPRO_10534/FPRO_15419	29
BP	GO:0044038	cell wall macromolecule biosynthetic process	15/897	44/3903	0.0612813	0.436411	0.400633	FPRO_04742/FPRO_09770/FPRO_10650/FPRO_15254/FPRO_00819/FPRO_11293/FPRO_00750/FPRO_15322/FPRO_07677/FPRO_05864/FPRO_03182/FPRO_13383/FPRO_10709/FPRO_08257/FPRO_00670	15
BP	GO:0070589	cellular component macromolecule biosynthetic process	15/897	44/3903	0.0612813	0.436411	0.400633	FPRO_04742/FPRO_09770/FPRO_10650/FPRO_15254/FPRO_00819/FPRO_11293/FPRO_00750/FPRO_15322/FPRO_07677/FPRO_05864/FPRO_03182/FPRO_13383/FPRO_10709/FPRO_08257/FPRO_00670	15
BP	GO:0009112	nucleobase metabolic process	13/897	37/3903	0.0629587	0.445176	0.408679	FPRO_11021/FPRO_02532/FPRO_01636/FPRO_07787/FPRO_03071/FPRO_06470/FPRO_00732/FPRO_15170/FPRO_02677/FPRO_08387/FPRO_02992/FPRO_11031/FPRO_00348	13
BP	GO:0070972	protein localization to endoplasmic reticulum	13/897	37/3903	0.0629587	0.445176	0.408679	FPRO_04841/FPRO_10589/FPRO_05848/FPRO_02526/FPRO_13426/FPRO_06156/FPRO_11015/FPRO_01429/FPRO_02530/FPRO_01372/FPRO_03182/FPRO_10362/FPRO_09416	13
BP	GO:0042908	xenobiotic transport	26/897	85/3903	0.0632173	0.445425	0.408908	FPRO_15682/FPRO_06607/FPRO_00501/FPRO_07088/FPRO_01002/FPRO_12998/FPRO_15689/FPRO_04144/FPRO_12785/FPRO_13638/FPRO_15345/FPRO_09599/FPRO_13015/FPRO_03217/FPRO_04826/FPRO_02941/FPRO_04351/FPRO_07716/FPRO_15367/FPRO_15066/FPRO_04588/FPRO_00555/FPRO_10679/FPRO_09436/FPRO_11603/FPRO_09402	26
MF	GO:0016779	nucleotidyltransferase activity	19/780	51/3372	0.0156187	0.446051	0.437755	FPRO_01461/FPRO_09770/FPRO_09182/FPRO_09159/FPRO_11862/FPRO_04161/FPRO_02390/FPRO_09716/FPRO_11799/FPRO_07588/FPRO_13115/FPRO_01808/FPRO_10572/FPRO_09138/FPRO_03133/FPRO_01101/FPRO_05958/FPRO_01117/FPRO_10735	19
MF	GO:0015318	inorganic molecular entity transmembrane transporter activity	60/780	202/3372	0.0156509	0.446051	0.437755	FPRO_00223/FPRO_15682/FPRO_15412/FPRO_06607/FPRO_11655/FPRO_00501/FPRO_05865/FPRO_07088/FPRO_06531/FPRO_01002/FPRO_08673/FPRO_12998/FPRO_04054/FPRO_03676/FPRO_01740/FPRO_07605/FPRO_03594/FPRO_15689/FPRO_04144/FPRO_07710/FPRO_11605/FPRO_13829/FPRO_05939/FPRO_04267/FPRO_10745/FPRO_13135/FPRO_09015/FPRO_12785/FPRO_13638/FPRO_04259/FPRO_15345/FPRO_04343/FPRO_09499/FPRO_09347/FPRO_04155/FPRO_10387/FPR…	60
BP	GO:0009063	cellular amino acid catabolic process	19/897	59/3903	0.0654779	0.453968	0.416751	FPRO_13261/FPRO_08943/FPRO_10632/FPRO_00812/FPRO_10599/FPRO_08361/FPRO_01751/FPRO_06340/FPRO_08360/FPRO_11056/FPRO_13282/FPRO_15504/FPRO_09324/FPRO_03129/FPRO_10707/FPRO_03141/FPRO_10929/FPRO_02935/FPRO_09694	19
BP	GO:0009308	amine metabolic process	16/897	48/3903	0.0655765	0.453968	0.416751	FPRO_13261/FPRO_13202/FPRO_06721/FPRO_06590/FPRO_03103/FPRO_07677/FPRO_06340/FPRO_03361/FPRO_04917/FPRO_00931/FPRO_04555/FPRO_10926/FPRO_03129/FPRO_05788/FPRO_09694/FPRO_14257	16
BP	GO:0098739	import across plasma membrane	16/897	48/3903	0.0655765	0.453968	0.416751	FPRO_15412/FPRO_06607/FPRO_07088/FPRO_05007/FPRO_04054/FPRO_14295/FPRO_11605/FPRO_11606/FPRO_04259/FPRO_04955/FPRO_03101/FPRO_07716/FPRO_09663/FPRO_07847/FPRO_15375/FPRO_10679	16
BP	GO:0009605	response to external stimulus	68/897	251/3903	0.0658087	0.453968	0.416751	FPRO_06401/FPRO_04421/FPRO_02568/FPRO_15412/FPRO_08120/FPRO_05057/FPRO_11021/FPRO_05045/FPRO_13463/FPRO_04151/FPRO_09700/FPRO_02532/FPRO_00592/FPRO_05941/FPRO_04054/FPRO_00812/FPRO_03676/FPRO_01086/FPRO_10022/FPRO_13037/FPRO_02896/FPRO_11293/FPRO_04924/FPRO_09440/FPRO_04267/FPRO_02559/FPRO_14612/FPRO_14280/FPRO_10387/FPRO_08211/FPRO_01372/FPRO_03937/FPRO_01132/FPRO_11832/FPRO_08143/FPRO_00931/FPR…	68
BP	GO:0006835	dicarboxylic acid transport	8/897	20/3903	0.066699	0.453968	0.416751	FPRO_06607/FPRO_00501/FPRO_09499/FPRO_09347/FPRO_03217/FPRO_04351/FPRO_07716/FPRO_10849	8
BP	GO:0034308	primary alcohol metabolic process	8/897	20/3903	0.066699	0.453968	0.416751	FPRO_03657/FPRO_00235/FPRO_01513/FPRO_06340/FPRO_11056/FPRO_03361/FPRO_13262/FPRO_04971	8
BP	GO:0070591	ascospore wall biogenesis	8/897	20/3903	0.066699	0.453968	0.416751	FPRO_09483/FPRO_06856/FPRO_01309/FPRO_07756/FPRO_10509/FPRO_07677/FPRO_10910/FPRO_15367	8
BP	GO:0071940	fungal-type cell wall assembly	8/897	20/3903	0.066699	0.453968	0.416751	FPRO_09483/FPRO_06856/FPRO_01309/FPRO_07756/FPRO_10509/FPRO_08143/FPRO_10910/FPRO_15367	8
BP	GO:0031668	cellular response to extracellular stimulus	53/897	191/3903	0.0667065	0.453968	0.416751	FPRO_06401/FPRO_02568/FPRO_15412/FPRO_08120/FPRO_05057/FPRO_05045/FPRO_04151/FPRO_09700/FPRO_02532/FPRO_05941/FPRO_04054/FPRO_00812/FPRO_03676/FPRO_01086/FPRO_10022/FPRO_13037/FPRO_02896/FPRO_04924/FPRO_09440/FPRO_04267/FPRO_14612/FPRO_10387/FPRO_03937/FPRO_01132/FPRO_11832/FPRO_08143/FPRO_04672/FPRO_09599/FPRO_10598/FPRO_06152/FPRO_09441/FPRO_08135/FPRO_04545/FPRO_03217/FPRO_06403/FPRO_14263/FPR…	53
BP	GO:0071496	cellular response to external stimulus	53/897	191/3903	0.0667065	0.453968	0.416751	FPRO_06401/FPRO_02568/FPRO_15412/FPRO_08120/FPRO_05057/FPRO_05045/FPRO_04151/FPRO_09700/FPRO_02532/FPRO_05941/FPRO_04054/FPRO_00812/FPRO_03676/FPRO_01086/FPRO_10022/FPRO_13037/FPRO_02896/FPRO_04924/FPRO_09440/FPRO_04267/FPRO_14612/FPRO_10387/FPRO_03937/FPRO_01132/FPRO_11832/FPRO_08143/FPRO_04672/FPRO_09599/FPRO_10598/FPRO_06152/FPRO_09441/FPRO_08135/FPRO_04545/FPRO_03217/FPRO_06403/FPRO_14263/FPR…	53
MF	GO:0016860	intramolecular oxidoreductase activity	10/780	22/3372	0.0171164	0.455296	0.446828	FPRO_08391/FPRO_05057/FPRO_05699/FPRO_04381/FPRO_15512/FPRO_06339/FPRO_02526/FPRO_03667/FPRO_04917/FPRO_03511	10
BP	GO:0019751	polyol metabolic process	12/897	34/3903	0.0702223	0.473237	0.43444	FPRO_02384/FPRO_05057/FPRO_08103/FPRO_14272/FPRO_02456/FPRO_11949/FPRO_03679/FPRO_04545/FPRO_07626/FPRO_03317/FPRO_14473/FPRO_14471	12
BP	GO:0045047	protein targeting to ER	10/897	27/3903	0.0702498	0.473237	0.43444	FPRO_04841/FPRO_10589/FPRO_05848/FPRO_13426/FPRO_11015/FPRO_02530/FPRO_01372/FPRO_03182/FPRO_10362/FPRO_09416	10
BP	GO:0072599	establishment of protein localization to endoplasmic reticulum	10/897	27/3903	0.0702498	0.473237	0.43444	FPRO_04841/FPRO_10589/FPRO_05848/FPRO_13426/FPRO_11015/FPRO_02530/FPRO_01372/FPRO_03182/FPRO_10362/FPRO_09416	10
BP	GO:0071554	cell wall organization or biogenesis	47/897	168/3903	0.071749	0.481709	0.442217	FPRO_11978/FPRO_09689/FPRO_04742/FPRO_02236/FPRO_09770/FPRO_09483/FPRO_08071/FPRO_05045/FPRO_06856/FPRO_00592/FPRO_10727/FPRO_10650/FPRO_15453/FPRO_06253/FPRO_15254/FPRO_00819/FPRO_10022/FPRO_11293/FPRO_01309/FPRO_07756/FPRO_06318/FPRO_00750/FPRO_15322/FPRO_13332/FPRO_10574/FPRO_10509/FPRO_07677/FPRO_05864/FPRO_08143/FPRO_03182/FPRO_09727/FPRO_09394/FPRO_05887/FPRO_13383/FPRO_09271/FPRO_10910/FPR…	47
BP	GO:0006213	pyrimidine nucleoside metabolic process	7/897	17/3903	0.0729206	0.483068	0.443465	FPRO_05863/FPRO_06470/FPRO_02677/FPRO_08387/FPRO_06109/FPRO_10853/FPRO_00921	7
BP	GO:0006656	phosphatidylcholine biosynthetic process	7/897	17/3903	0.0729206	0.483068	0.443465	FPRO_05805/FPRO_10632/FPRO_07694/FPRO_06394/FPRO_11832/FPRO_11871/FPRO_04545	7
BP	GO:0140115	export across plasma membrane	7/897	17/3903	0.0729206	0.483068	0.443465	FPRO_15682/FPRO_03676/FPRO_13135/FPRO_12785/FPRO_10387/FPRO_04826/FPRO_04158	7
BP	GO:1990822	basic amino acid transmembrane transport	7/897	17/3903	0.0729206	0.483068	0.443465	FPRO_15345/FPRO_03217/FPRO_11123/FPRO_04588/FPRO_10679/FPRO_06640/FPRO_09402	7
BP	GO:0034614	cellular response to reactive oxygen species	13/897	38/3903	0.0763774	0.504293	0.46295	FPRO_08499/FPRO_05941/FPRO_04981/FPRO_13037/FPRO_00701/FPRO_14612/FPRO_10778/FPRO_08143/FPRO_03158/FPRO_07874/FPRO_04612/FPRO_05233/FPRO_15419	13
BP	GO:0030001	metal ion transport	30/897	102/3903	0.0769371	0.505735	0.464274	FPRO_09226/FPRO_05865/FPRO_06531/FPRO_09879/FPRO_08673/FPRO_03676/FPRO_11055/FPRO_01086/FPRO_11605/FPRO_11606/FPRO_04924/FPRO_02447/FPRO_10745/FPRO_13135/FPRO_09015/FPRO_04259/FPRO_10387/FPRO_13930/FPRO_02700/FPRO_04672/FPRO_04955/FPRO_01068/FPRO_14247/FPRO_14260/FPRO_07847/FPRO_04218/FPRO_01365/FPRO_06193/FPRO_03585/FPRO_15073	30
BP	GO:0006661	phosphatidylinositol biosynthetic process	16/897	49/3903	0.0774592	0.505735	0.464274	FPRO_06318/FPRO_10708/FPRO_04130/FPRO_03632/FPRO_06094/FPRO_07945/FPRO_01758/FPRO_11988/FPRO_00814/FPRO_06352/FPRO_05963/FPRO_10657/FPRO_01607/FPRO_13298/FPRO_04731/FPRO_09466	16
BP	GO:0048315	conidium formation	9/897	24/3903	0.0781176	0.505735	0.464274	FPRO_14081/FPRO_15322/FPRO_01444/FPRO_07677/FPRO_07976/FPRO_10903/FPRO_04526/FPRO_05233/FPRO_00574	9
BP	GO:0051094	positive regulation of developmental process	9/897	24/3903	0.0781176	0.505735	0.464274	FPRO_05045/FPRO_06253/FPRO_04924/FPRO_01444/FPRO_07976/FPRO_11832/FPRO_04526/FPRO_00574/FPRO_09466	9
BP	GO:0061794	conidium development	9/897	24/3903	0.0781176	0.505735	0.464274	FPRO_14081/FPRO_15322/FPRO_01444/FPRO_07677/FPRO_07976/FPRO_10903/FPRO_04526/FPRO_05233/FPRO_00574	9
BP	GO:0070590	spore wall biogenesis	9/897	24/3903	0.0781176	0.505735	0.464274	FPRO_09770/FPRO_09483/FPRO_06856/FPRO_01309/FPRO_07756/FPRO_10509/FPRO_07677/FPRO_10910/FPRO_15367	9
BP	GO:0070592	cell wall polysaccharide biosynthetic process	11/897	31/3903	0.0784185	0.50604	0.464554	FPRO_15254/FPRO_00819/FPRO_00750/FPRO_15322/FPRO_07677/FPRO_05864/FPRO_03182/FPRO_13383/FPRO_10709/FPRO_08257/FPRO_00670	11
BP	GO:0019400	alditol metabolic process	6/897	14/3903	0.0791061	0.507195	0.465614	FPRO_02384/FPRO_05057/FPRO_14272/FPRO_03679/FPRO_14473/FPRO_14471	6
BP	GO:0044409	entry into host	6/897	14/3903	0.0791061	0.507195	0.465614	FPRO_05057/FPRO_05045/FPRO_00592/FPRO_01372/FPRO_00931/FPRO_10705	6
MF	GO:0015075	ion transmembrane transporter activity	60/780	205/3372	0.0213684	0.511307	0.501797	FPRO_00223/FPRO_14174/FPRO_15412/FPRO_06607/FPRO_11655/FPRO_00501/FPRO_05865/FPRO_07088/FPRO_06531/FPRO_01002/FPRO_08673/FPRO_12998/FPRO_04054/FPRO_03676/FPRO_07605/FPRO_15689/FPRO_04144/FPRO_07710/FPRO_11605/FPRO_13829/FPRO_05939/FPRO_04267/FPRO_10745/FPRO_13135/FPRO_09015/FPRO_13638/FPRO_04259/FPRO_15345/FPRO_04343/FPRO_09499/FPRO_09347/FPRO_04155/FPRO_10387/FPRO_00955/FPRO_09283/FPRO_13015/FPR…	60
MF	GO:0016298	lipase activity	11/780	26/3372	0.0229191	0.511307	0.501797	FPRO_01104/FPRO_15017/FPRO_10650/FPRO_05122/FPRO_06496/FPRO_13081/FPRO_03937/FPRO_03361/FPRO_08124/FPRO_11680/FPRO_04849	11
MF	GO:0008374	O-acyltransferase activity	9/780	20/3372	0.0251366	0.511307	0.501797	FPRO_00589/FPRO_05125/FPRO_08179/FPRO_11747/FPRO_11700/FPRO_00084/FPRO_02082/FPRO_01607/FPRO_10872	9
MF	GO:0004601	peroxidase activity	8/780	17/3372	0.0256294	0.511307	0.501797	FPRO_08499/FPRO_09673/FPRO_00701/FPRO_14612/FPRO_05233/FPRO_15142/FPRO_06705/FPRO_15419	8
MF	GO:0016684	oxidoreductase activity, acting on peroxide as acceptor	8/780	17/3372	0.0256294	0.511307	0.501797	FPRO_08499/FPRO_09673/FPRO_00701/FPRO_14612/FPRO_05233/FPRO_15142/FPRO_06705/FPRO_15419	8
BP	GO:0009060	aerobic respiration	21/897	68/3903	0.0813699	0.520037	0.477403	FPRO_06100/FPRO_09542/FPRO_04343/FPRO_03469/FPRO_03064/FPRO_01468/FPRO_07698/FPRO_07711/FPRO_00990/FPRO_08384/FPRO_08162/FPRO_04719/FPRO_13262/FPRO_03165/FPRO_09417/FPRO_04760/FPRO_01063/FPRO_04574/FPRO_01540/FPRO_10872/FPRO_00754	21
BP	GO:0036267	invasive filamentous growth	14/897	42/3903	0.0817723	0.520939	0.478231	FPRO_04421/FPRO_11655/FPRO_09700/FPRO_10727/FPRO_04924/FPRO_02390/FPRO_04355/FPRO_08143/FPRO_00931/FPRO_04672/FPRO_09271/FPRO_04271/FPRO_00487/FPRO_10534	14
BP	GO:0043934	sporulation	38/897	134/3903	0.082851	0.523636	0.480707	FPRO_00841/FPRO_05805/FPRO_09689/FPRO_09770/FPRO_09483/FPRO_05045/FPRO_06856/FPRO_14081/FPRO_10727/FPRO_05941/FPRO_01740/FPRO_14055/FPRO_01309/FPRO_07756/FPRO_07982/FPRO_15322/FPRO_01444/FPRO_10509/FPRO_07677/FPRO_07976/FPRO_10903/FPRO_00990/FPRO_04526/FPRO_13085/FPRO_08124/FPRO_03045/FPRO_10910/FPRO_00709/FPRO_09628/FPRO_15367/FPRO_07951/FPRO_04220/FPRO_05233/FPRO_00574/FPRO_00670/FPRO_13326/FPR…	38
BP	GO:0009607	response to biotic stimulus	28/897	95/3903	0.0834846	0.523636	0.480707	FPRO_06401/FPRO_02568/FPRO_05057/FPRO_11021/FPRO_05045/FPRO_13463/FPRO_04151/FPRO_09700/FPRO_00592/FPRO_05941/FPRO_15453/FPRO_11293/FPRO_04267/FPRO_10463/FPRO_14280/FPRO_08211/FPRO_01372/FPRO_03937/FPRO_11832/FPRO_00931/FPRO_06152/FPRO_02933/FPRO_08135/FPRO_01733/FPRO_05887/FPRO_04545/FPRO_10408/FPRO_08437	28
BP	GO:0000103	sulfate assimilation	5/897	11/3903	0.0845591	0.523636	0.480707	FPRO_09182/FPRO_03202/FPRO_08393/FPRO_00611/FPRO_03120	5
BP	GO:0002682	regulation of immune system process	5/897	11/3903	0.0845591	0.523636	0.480707	FPRO_05045/FPRO_13463/FPRO_09700/FPRO_14280/FPRO_01733	5
BP	GO:0006551	leucine metabolic process	5/897	11/3903	0.0845591	0.523636	0.480707	FPRO_11699/FPRO_05139/FPRO_07903/FPRO_06219/FPRO_03141	5
BP	GO:0006730	one-carbon metabolic process	5/897	11/3903	0.0845591	0.523636	0.480707	FPRO_07787/FPRO_12807/FPRO_09324/FPRO_01587/FPRO_04474	5
BP	GO:0009237	siderophore metabolic process	5/897	11/3903	0.0845591	0.523636	0.480707	FPRO_06531/FPRO_13037/FPRO_02896/FPRO_14261/FPRO_13036	5
BP	GO:0042276	error-prone translesion synthesis	5/897	11/3903	0.0845591	0.523636	0.480707	FPRO_09159/FPRO_11862/FPRO_08263/FPRO_09138/FPRO_05958	5
BP	GO:0043243	positive regulation of protein-containing complex disassembly	5/897	11/3903	0.0845591	0.523636	0.480707	FPRO_06100/FPRO_03195/FPRO_08085/FPRO_06152/FPRO_05221	5
BP	GO:0017004	cytochrome complex assembly	10/897	28/3903	0.0876917	0.541354	0.496972	FPRO_09669/FPRO_07711/FPRO_01068/FPRO_03235/FPRO_08212/FPRO_10988/FPRO_00370/FPRO_09205/FPRO_02865/FPRO_00754	10
BP	GO:0042592	homeostatic process	75/897	284/3903	0.0895529	0.551137	0.505953	FPRO_02384/FPRO_14009/FPRO_00664/FPRO_15682/FPRO_03170/FPRO_00589/FPRO_09226/FPRO_05045/FPRO_01028/FPRO_05865/FPRO_13463/FPRO_06531/FPRO_09879/FPRO_06339/FPRO_02532/FPRO_08673/FPRO_09673/FPRO_03676/FPRO_11055/FPRO_01086/FPRO_11605/FPRO_11606/FPRO_13037/FPRO_02896/FPRO_10745/FPRO_13135/FPRO_12967/FPRO_09015/FPRO_07982/FPRO_12785/FPRO_03195/FPRO_05980/FPRO_04259/FPRO_02559/FPRO_14612/FPRO_10387/FPR…	75
BP	GO:0009101	glycoprotein biosynthetic process	20/897	65/3903	0.090359	0.554387	0.508937	FPRO_04742/FPRO_09770/FPRO_10545/FPRO_10650/FPRO_06021/FPRO_15254/FPRO_11293/FPRO_00259/FPRO_08456/FPRO_00750/FPRO_12967/FPRO_03064/FPRO_02666/FPRO_05864/FPRO_08173/FPRO_10572/FPRO_03006/FPRO_06165/FPRO_01101/FPRO_04517	20
BP	GO:0007062	sister chromatid cohesion	13/897	39/3903	0.0915036	0.559615	0.513736	FPRO_04827/FPRO_11070/FPRO_01114/FPRO_03022/FPRO_11870/FPRO_01311/FPRO_00740/FPRO_09138/FPRO_05043/FPRO_13052/FPRO_12044/FPRO_02777/FPRO_05958	13
BP	GO:0030154	cell differentiation	51/897	187/3903	0.0917723	0.559615	0.513736	FPRO_00841/FPRO_05805/FPRO_09689/FPRO_00664/FPRO_09770/FPRO_09483/FPRO_05045/FPRO_06856/FPRO_14081/FPRO_10727/FPRO_05941/FPRO_04827/FPRO_01740/FPRO_06253/FPRO_14055/FPRO_04924/FPRO_09440/FPRO_01309/FPRO_07756/FPRO_07982/FPRO_15322/FPRO_01444/FPRO_10509/FPRO_07677/FPRO_07976/FPRO_10903/FPRO_00990/FPRO_04526/FPRO_04683/FPRO_13085/FPRO_04545/FPRO_08124/FPRO_03045/FPRO_10705/FPRO_08259/FPRO_10910/FPR…	51
CC	GO:0043596	nuclear replication fork	20/866	63/3758	0.0699162	0.562508	0.52019	FPRO_09159/FPRO_04827/FPRO_06020/FPRO_11070/FPRO_11799/FPRO_13085/FPRO_02586/FPRO_08259/FPRO_04771/FPRO_10984/FPRO_10729/FPRO_00736/FPRO_01311/FPRO_00767/FPRO_00740/FPRO_09138/FPRO_13052/FPRO_03133/FPRO_00954/FPRO_05958	20
BP	GO:0097164	ammonium ion metabolic process	11/897	32/3903	0.0957503	0.581726	0.534034	FPRO_15017/FPRO_06721/FPRO_10632/FPRO_10599/FPRO_00730/FPRO_11832/FPRO_11871/FPRO_07626/FPRO_11680/FPRO_02993/FPRO_05788	11
BP	GO:0006740	NADPH regeneration	7/897	18/3903	0.0965653	0.581726	0.534034	FPRO_00664/FPRO_08391/FPRO_05699/FPRO_09723/FPRO_01513/FPRO_01140/FPRO_07963	7
BP	GO:0030476	ascospore wall assembly	7/897	18/3903	0.0965653	0.581726	0.534034	FPRO_09483/FPRO_06856/FPRO_01309/FPRO_07756/FPRO_10509/FPRO_10910/FPRO_15367	7
BP	GO:0045597	positive regulation of cell differentiation	7/897	18/3903	0.0965653	0.581726	0.534034	FPRO_06253/FPRO_04924/FPRO_01444/FPRO_07976/FPRO_04526/FPRO_00574/FPRO_09466	7
MF	GO:0015179	L-amino acid transmembrane transporter activity	11/780	27/3372	0.0308239	0.585654	0.574761	FPRO_07088/FPRO_01002/FPRO_04144/FPRO_15345/FPRO_03217/FPRO_15066/FPRO_04588/FPRO_00555/FPRO_10679/FPRO_11603/FPRO_09402	11
BP	GO:0005977	glycogen metabolic process	9/897	25/3903	0.0982158	0.589886	0.541526	FPRO_04819/FPRO_02640/FPRO_13059/FPRO_09310/FPRO_12250/FPRO_03028/FPRO_11848/FPRO_01101/FPRO_05728	9
MF	GO:1901682	sulfur compound transmembrane transporter activity	9/780	21/3372	0.0352061	0.5995	0.58835	FPRO_07088/FPRO_04144/FPRO_04267/FPRO_00955/FPRO_09283/FPRO_13015/FPRO_12924/FPRO_10849/FPRO_11603	9
MF	GO:0042578	phosphoric ester hydrolase activity	27/780	84/3372	0.0353187	0.5995	0.58835	FPRO_02525/FPRO_10827/FPRO_02532/FPRO_05941/FPRO_06100/FPRO_10814/FPRO_02362/FPRO_02456/FPRO_13241/FPRO_10509/FPRO_11949/FPRO_04173/FPRO_03361/FPRO_03022/FPRO_02640/FPRO_09456/FPRO_01387/FPRO_09441/FPRO_13399/FPRO_08124/FPRO_12048/FPRO_04279/FPRO_03120/FPRO_00387/FPRO_10611/FPRO_05919/FPRO_11694	27
MF	GO:0015175	neutral amino acid transmembrane transporter activity	8/780	18/3372	0.0370203	0.5995	0.58835	FPRO_01002/FPRO_03217/FPRO_12924/FPRO_15066/FPRO_04588/FPRO_00555/FPRO_10679/FPRO_11603	8
MF	GO:0008324	cation transmembrane transporter activity	42/780	141/3372	0.0375626	0.5995	0.58835	FPRO_15412/FPRO_06607/FPRO_11655/FPRO_05865/FPRO_07088/FPRO_06531/FPRO_01002/FPRO_08673/FPRO_12998/FPRO_04054/FPRO_03676/FPRO_15689/FPRO_04144/FPRO_11605/FPRO_13829/FPRO_05939/FPRO_10745/FPRO_13135/FPRO_09015/FPRO_04259/FPRO_15345/FPRO_04343/FPRO_04155/FPRO_10387/FPRO_09283/FPRO_13015/FPRO_04955/FPRO_03217/FPRO_00802/FPRO_04176/FPRO_12924/FPRO_04613/FPRO_07716/FPRO_15066/FPRO_07847/FPRO_04218/FPR…	42
BP	GO:1902600	proton transmembrane transport	19/897	62/3903	0.100404	0.60122	0.551931	FPRO_15412/FPRO_06607/FPRO_06531/FPRO_04054/FPRO_13829/FPRO_05939/FPRO_09015/FPRO_04343/FPRO_04155/FPRO_09283/FPRO_08384/FPRO_00802/FPRO_04613/FPRO_07716/FPRO_09417/FPRO_04760/FPRO_01063/FPRO_03223/FPRO_03585	19
BP	GO:0000002	mitochondrial genome maintenance	12/897	36/3903	0.102565	0.608744	0.558837	FPRO_00501/FPRO_09159/FPRO_10385/FPRO_07903/FPRO_01370/FPRO_10729/FPRO_01542/FPRO_04812/FPRO_08452/FPRO_09295/FPRO_08449/FPRO_10735	12
BP	GO:0001403	invasive growth in response to glucose limitation	12/897	36/3903	0.102565	0.608744	0.558837	FPRO_11655/FPRO_09700/FPRO_10727/FPRO_04924/FPRO_02390/FPRO_04355/FPRO_08143/FPRO_00931/FPRO_04672/FPRO_09271/FPRO_04271/FPRO_10534	12
BP	GO:0009991	response to extracellular stimulus	61/897	229/3903	0.102577	0.608744	0.558837	FPRO_06401/FPRO_04421/FPRO_02568/FPRO_15412/FPRO_08120/FPRO_05057/FPRO_05045/FPRO_04151/FPRO_09700/FPRO_02532/FPRO_00592/FPRO_05941/FPRO_04054/FPRO_00812/FPRO_03676/FPRO_01086/FPRO_10022/FPRO_13037/FPRO_02896/FPRO_04924/FPRO_09440/FPRO_04267/FPRO_02559/FPRO_14612/FPRO_10387/FPRO_03937/FPRO_01132/FPRO_11832/FPRO_08143/FPRO_00931/FPRO_04672/FPRO_09599/FPRO_10598/FPRO_06152/FPRO_09441/FPRO_08135/FPR…	61
BP	GO:0006783	heme biosynthetic process	6/897	15/3903	0.107183	0.626756	0.575373	FPRO_03202/FPRO_00662/FPRO_08062/FPRO_04969/FPRO_10922/FPRO_00555	6
BP	GO:0019985	translesion synthesis	6/897	15/3903	0.107183	0.626756	0.575373	FPRO_09159/FPRO_11862/FPRO_01411/FPRO_08263/FPRO_09138/FPRO_05958	6
BP	GO:0035672	oligopeptide transmembrane transport	6/897	15/3903	0.107183	0.626756	0.575373	FPRO_06531/FPRO_05007/FPRO_14295/FPRO_09663/FPRO_04158/FPRO_15073	6
BP	GO:0045117	azole transmembrane transport	6/897	15/3903	0.107183	0.626756	0.575373	FPRO_15682/FPRO_07088/FPRO_12785/FPRO_15345/FPRO_03217/FPRO_09402	6
BP	GO:0045833	negative regulation of lipid metabolic process	6/897	15/3903	0.107183	0.626756	0.575373	FPRO_05805/FPRO_11833/FPRO_06318/FPRO_06394/FPRO_10381/FPRO_07945	6
BP	GO:1901071	glucosamine-containing compound metabolic process	10/897	29/3903	0.107512	0.626838	0.575448	FPRO_00841/FPRO_02236/FPRO_14055/FPRO_00819/FPRO_00750/FPRO_15322/FPRO_07677/FPRO_13383/FPRO_08257/FPRO_00670	10
BP	GO:0010035	response to inorganic substance	23/897	78/3903	0.108784	0.632404	0.580557	FPRO_00664/FPRO_08499/FPRO_05045/FPRO_10727/FPRO_05941/FPRO_09673/FPRO_12807/FPRO_13037/FPRO_14612/FPRO_11205/FPRO_08143/FPRO_03158/FPRO_02941/FPRO_02298/FPRO_07874/FPRO_00477/FPRO_06261/FPRO_04612/FPRO_04218/FPRO_05233/FPRO_15419/FPRO_04767/FPRO_15073	23
CC	GO:0031984	organelle subcompartment	87/866	331/3758	0.0824797	0.64884	0.600028	FPRO_06323/FPRO_04742/FPRO_02842/FPRO_02568/FPRO_08475/FPRO_06098/FPRO_08494/FPRO_07088/FPRO_06856/FPRO_04841/FPRO_10589/FPRO_06021/FPRO_04342/FPRO_01740/FPRO_13293/FPRO_05179/FPRO_04803/FPRO_10022/FPRO_00259/FPRO_02526/FPRO_13426/FPRO_01309/FPRO_08456/FPRO_06156/FPRO_09955/FPRO_06318/FPRO_08453/FPRO_04702/FPRO_10529/FPRO_10708/FPRO_04130/FPRO_00962/FPRO_00730/FPRO_03632/FPRO_01429/FPRO_07968/FPR…	87
BP	GO:0006486	protein glycosylation	19/897	63/3903	0.114246	0.658402	0.604425	FPRO_04742/FPRO_09770/FPRO_10545/FPRO_06021/FPRO_15254/FPRO_11293/FPRO_00259/FPRO_08456/FPRO_00750/FPRO_12967/FPRO_03064/FPRO_02666/FPRO_05864/FPRO_08173/FPRO_10572/FPRO_03006/FPRO_06165/FPRO_01101/FPRO_04517	19
BP	GO:0043413	macromolecule glycosylation	19/897	63/3903	0.114246	0.658402	0.604425	FPRO_04742/FPRO_09770/FPRO_10545/FPRO_06021/FPRO_15254/FPRO_11293/FPRO_00259/FPRO_08456/FPRO_00750/FPRO_12967/FPRO_03064/FPRO_02666/FPRO_05864/FPRO_08173/FPRO_10572/FPRO_03006/FPRO_06165/FPRO_01101/FPRO_04517	19
BP	GO:1900428	regulation of filamentous growth of a population of unicellular organisms	19/897	63/3903	0.114246	0.658402	0.604425	FPRO_02568/FPRO_05045/FPRO_09700/FPRO_04981/FPRO_06253/FPRO_04924/FPRO_02390/FPRO_00962/FPRO_08143/FPRO_00931/FPRO_04672/FPRO_08135/FPRO_05887/FPRO_04545/FPRO_08504/FPRO_08257/FPRO_13305/FPRO_15764/FPRO_09694	19
BP	GO:0006555	methionine metabolic process	11/897	33/3903	0.11519	0.661928	0.607661	FPRO_11021/FPRO_10632/FPRO_08458/FPRO_07727/FPRO_09489/FPRO_03390/FPRO_00772/FPRO_03120/FPRO_04474/FPRO_01204/FPRO_11834	11
CC	GO:0098590	plasma membrane region	12/866	35/3758	0.086853	0.662784	0.612922	FPRO_15412/FPRO_08071/FPRO_07088/FPRO_04054/FPRO_14295/FPRO_07487/FPRO_04560/FPRO_04842/FPRO_11644/FPRO_02471/FPRO_07847/FPRO_10679	12
CC	GO:0030445	yeast-form cell wall	8/866	21/3758	0.0879967	0.662784	0.612922	FPRO_06401/FPRO_02236/FPRO_04151/FPRO_00592/FPRO_01372/FPRO_03074/FPRO_09277/FPRO_01101	8
BP	GO:0006409	tRNA export from nucleus	5/897	12/3903	0.118528	0.667641	0.612906	FPRO_09503/FPRO_04796/FPRO_07811/FPRO_09277/FPRO_11950	5
BP	GO:0006573	valine metabolic process	5/897	12/3903	0.118528	0.667641	0.612906	FPRO_13205/FPRO_11699/FPRO_07903/FPRO_06219/FPRO_03141	5
BP	GO:0034309	primary alcohol biosynthetic process	5/897	12/3903	0.118528	0.667641	0.612906	FPRO_03657/FPRO_00235/FPRO_06340/FPRO_11056/FPRO_04971	5
BP	GO:0072741	protein localization to cell division site	5/897	12/3903	0.118528	0.667641	0.612906	FPRO_09700/FPRO_07487/FPRO_10903/FPRO_06152/FPRO_09628	5
BP	GO:1901679	nucleotide transmembrane transport	5/897	12/3903	0.118528	0.667641	0.612906	FPRO_07710/FPRO_09283/FPRO_04351/FPRO_01542/FPRO_07847	5
BP	GO:1902022	L-lysine transport	5/897	12/3903	0.118528	0.667641	0.612906	FPRO_15345/FPRO_03217/FPRO_04588/FPRO_10679/FPRO_09402	5
BP	GO:1903401	L-lysine transmembrane transport	5/897	12/3903	0.118528	0.667641	0.612906	FPRO_15345/FPRO_03217/FPRO_04588/FPRO_10679/FPRO_09402	5
MF	GO:0009055	electron transfer activity	10/780	25/3372	0.0440575	0.674104	0.661567	FPRO_00523/FPRO_04343/FPRO_09611/FPRO_04330/FPRO_08408/FPRO_03336/FPRO_09411/FPRO_07874/FPRO_13262/FPRO_01063	10
MF	GO:0016791	phosphatase activity	23/780	71/3372	0.0456161	0.674104	0.661567	FPRO_10827/FPRO_02532/FPRO_05941/FPRO_06100/FPRO_10814/FPRO_02362/FPRO_02456/FPRO_13241/FPRO_10509/FPRO_11949/FPRO_04173/FPRO_03022/FPRO_02640/FPRO_09456/FPRO_01387/FPRO_13399/FPRO_12048/FPRO_04279/FPRO_03120/FPRO_00387/FPRO_10611/FPRO_05919/FPRO_11694	23
BP	GO:0048869	cellular developmental process	66/897	252/3903	0.120977	0.67586	0.620451	FPRO_00841/FPRO_05805/FPRO_09689/FPRO_00664/FPRO_00079/FPRO_09770/FPRO_09483/FPRO_05045/FPRO_06856/FPRO_14081/FPRO_09723/FPRO_10727/FPRO_05941/FPRO_04827/FPRO_01740/FPRO_06253/FPRO_14055/FPRO_10022/FPRO_04924/FPRO_09440/FPRO_01309/FPRO_07756/FPRO_07982/FPRO_15322/FPRO_11070/FPRO_01444/FPRO_10509/FPRO_07487/FPRO_14612/FPRO_07677/FPRO_07976/FPRO_10778/FPRO_08143/FPRO_10903/FPRO_00990/FPRO_06152/FPR…	66
BP	GO:0005984	disaccharide metabolic process	9/897	26/3903	0.121004	0.67586	0.620451	FPRO_05941/FPRO_04924/FPRO_02362/FPRO_10778/FPRO_08143/FPRO_04672/FPRO_00574/FPRO_01101/FPRO_06637	9
BP	GO:0042542	response to hydrogen peroxide	9/897	26/3903	0.121004	0.67586	0.620451	FPRO_00664/FPRO_05941/FPRO_13037/FPRO_14612/FPRO_03158/FPRO_07874/FPRO_04612/FPRO_05233/FPRO_15419	9
BP	GO:0031669	cellular response to nutrient levels	50/897	187/3903	0.123508	0.682518	0.626563	FPRO_06401/FPRO_02568/FPRO_15412/FPRO_08120/FPRO_05057/FPRO_05045/FPRO_04151/FPRO_09700/FPRO_02532/FPRO_04054/FPRO_00812/FPRO_03676/FPRO_01086/FPRO_10022/FPRO_13037/FPRO_02896/FPRO_04924/FPRO_04267/FPRO_10387/FPRO_03937/FPRO_01132/FPRO_11832/FPRO_08143/FPRO_04672/FPRO_09599/FPRO_10598/FPRO_06152/FPRO_09441/FPRO_08135/FPRO_04545/FPRO_03217/FPRO_06403/FPRO_14263/FPRO_06261/FPRO_09691/FPRO_04271/FPR…	50
BP	GO:0006720	isoprenoid metabolic process	7/897	19/3903	0.123907	0.682518	0.626563	FPRO_05777/FPRO_15512/FPRO_03366/FPRO_07922/FPRO_03278/FPRO_03521/FPRO_04857	7
BP	GO:0015802	basic amino acid transport	7/897	19/3903	0.123907	0.682518	0.626563	FPRO_15345/FPRO_03217/FPRO_11123/FPRO_04588/FPRO_10679/FPRO_06640/FPRO_09402	7
BP	GO:0071805	potassium ion transmembrane transport	7/897	19/3903	0.123907	0.682518	0.626563	FPRO_03676/FPRO_02447/FPRO_13135/FPRO_09015/FPRO_10387/FPRO_13930/FPRO_04955	7
BP	GO:0072697	protein localization to cell cortex	7/897	19/3903	0.123907	0.682518	0.626563	FPRO_09689/FPRO_09700/FPRO_01427/FPRO_07487/FPRO_10941/FPRO_10903/FPRO_06152	7
CC	GO:0045121	membrane raft	7/866	18/3758	0.0976974	0.705814	0.652715	FPRO_09689/FPRO_15682/FPRO_04251/FPRO_12785/FPRO_15345/FPRO_04842/FPRO_04955	7
CC	GO:0098857	membrane microdomain	7/866	18/3758	0.0976974	0.705814	0.652715	FPRO_09689/FPRO_15682/FPRO_04251/FPRO_12785/FPRO_15345/FPRO_04842/FPRO_04955	7
CC	GO:0030176	integral component of endoplasmic reticulum membrane	25/866	85/3758	0.102384	0.710668	0.657204	FPRO_06323/FPRO_08475/FPRO_06021/FPRO_04342/FPRO_05179/FPRO_00259/FPRO_06318/FPRO_08453/FPRO_10529/FPRO_10708/FPRO_04130/FPRO_00730/FPRO_03632/FPRO_07968/FPRO_03064/FPRO_01132/FPRO_08179/FPRO_11747/FPRO_04642/FPRO_00577/FPRO_04926/FPRO_00477/FPRO_11988/FPRO_08452/FPRO_03585	25
CC	GO:0031227	intrinsic component of endoplasmic reticulum membrane	25/866	85/3758	0.102384	0.710668	0.657204	FPRO_06323/FPRO_08475/FPRO_06021/FPRO_04342/FPRO_05179/FPRO_00259/FPRO_06318/FPRO_08453/FPRO_10529/FPRO_10708/FPRO_04130/FPRO_00730/FPRO_03632/FPRO_07968/FPRO_03064/FPRO_01132/FPRO_08179/FPRO_11747/FPRO_04642/FPRO_00577/FPRO_04926/FPRO_00477/FPRO_11988/FPRO_08452/FPRO_03585	25
BP	GO:0009628	response to abiotic stimulus	52/897	196/3903	0.131078	0.719834	0.66082	FPRO_02384/FPRO_06401/FPRO_11021/FPRO_05045/FPRO_09700/FPRO_15017/FPRO_00592/FPRO_10727/FPRO_10385/FPRO_05941/FPRO_01513/FPRO_03676/FPRO_10589/FPRO_01427/FPRO_10022/FPRO_12793/FPRO_10574/FPRO_08085/FPRO_03469/FPRO_10387/FPRO_10941/FPRO_01372/FPRO_10778/FPRO_01132/FPRO_04107/FPRO_11832/FPRO_00931/FPRO_12794/FPRO_15561/FPRO_04545/FPRO_03427/FPRO_10984/FPRO_00477/FPRO_01311/FPRO_05836/FPRO_11680/FPR…	52
BP	GO:0006081	cellular aldehyde metabolic process	14/897	45/3903	0.131404	0.719834	0.66082	FPRO_00664/FPRO_08391/FPRO_08120/FPRO_05057/FPRO_05699/FPRO_13202/FPRO_09723/FPRO_06590/FPRO_01140/FPRO_11056/FPRO_07963/FPRO_04451/FPRO_00437/FPRO_02993	14
BP	GO:0000725	recombinational repair	22/897	76/3903	0.134252	0.733421	0.673293	FPRO_15682/FPRO_11211/FPRO_09440/FPRO_09539/FPRO_12785/FPRO_11070/FPRO_10574/FPRO_01114/FPRO_03022/FPRO_10953/FPRO_04672/FPRO_08259/FPRO_10729/FPRO_15929/FPRO_07858/FPRO_01165/FPRO_02777/FPRO_03133/FPRO_00954/FPRO_00797/FPRO_09295/FPRO_04265	22
CC	GO:0005788	endoplasmic reticulum lumen	6/866	15/3758	0.108306	0.737312	0.681843	FPRO_08475/FPRO_11015/FPRO_10529/FPRO_05864/FPRO_03182/FPRO_03511	6
BP	GO:0070301	cellular response to hydrogen peroxide	8/897	23/3903	0.136581	0.738615	0.678061	FPRO_05941/FPRO_13037/FPRO_14612/FPRO_03158/FPRO_07874/FPRO_04612/FPRO_05233/FPRO_15419	8
BP	GO:0070726	cell wall assembly	8/897	23/3903	0.136581	0.738615	0.678061	FPRO_09483/FPRO_06856/FPRO_01309/FPRO_07756/FPRO_10509/FPRO_08143/FPRO_10910/FPRO_15367	8
BP	GO:0006568	tryptophan metabolic process	6/897	16/3903	0.139648	0.738615	0.678061	FPRO_13261/FPRO_03103/FPRO_06340/FPRO_04917/FPRO_04555/FPRO_10926	6
BP	GO:0006586	indolalkylamine metabolic process	6/897	16/3903	0.139648	0.738615	0.678061	FPRO_13261/FPRO_03103/FPRO_06340/FPRO_04917/FPRO_04555/FPRO_10926	6
BP	GO:0006779	porphyrin-containing compound biosynthetic process	6/897	16/3903	0.139648	0.738615	0.678061	FPRO_03202/FPRO_00662/FPRO_08062/FPRO_04969/FPRO_10922/FPRO_00555	6
BP	GO:0008299	isoprenoid biosynthetic process	6/897	16/3903	0.139648	0.738615	0.678061	FPRO_05777/FPRO_15512/FPRO_03366/FPRO_07922/FPRO_03521/FPRO_04857	6
BP	GO:0015985	energy coupled proton transport, down electrochemical gradient	6/897	16/3903	0.139648	0.738615	0.678061	FPRO_05939/FPRO_08384/FPRO_09417/FPRO_04760/FPRO_01063/FPRO_03223	6
BP	GO:0015986	proton motive force-driven ATP synthesis	6/897	16/3903	0.139648	0.738615	0.678061	FPRO_05939/FPRO_08384/FPRO_09417/FPRO_04760/FPRO_01063/FPRO_03223	6
BP	GO:0033014	tetrapyrrole biosynthetic process	6/897	16/3903	0.139648	0.738615	0.678061	FPRO_03202/FPRO_00662/FPRO_08062/FPRO_04969/FPRO_10922/FPRO_00555	6
BP	GO:0042168	heme metabolic process	6/897	16/3903	0.139648	0.738615	0.678061	FPRO_03202/FPRO_00662/FPRO_08062/FPRO_04969/FPRO_10922/FPRO_00555	6
BP	GO:0042430	indole-containing compound metabolic process	6/897	16/3903	0.139648	0.738615	0.678061	FPRO_13261/FPRO_03103/FPRO_06340/FPRO_04917/FPRO_04555/FPRO_10926	6
BP	GO:0046164	alcohol catabolic process	6/897	16/3903	0.139648	0.738615	0.678061	FPRO_05057/FPRO_01513/FPRO_04924/FPRO_11949/FPRO_11056/FPRO_03679	6
CC	GO:0019898	extrinsic component of membrane	23/866	78/3758	0.11124	0.742998	0.687102	FPRO_07721/FPRO_10022/FPRO_07694/FPRO_15170/FPRO_01387/FPRO_05830/FPRO_02869/FPRO_03542/FPRO_03045/FPRO_04717/FPRO_00709/FPRO_01758/FPRO_01661/FPRO_02968/FPRO_07951/FPRO_09541/FPRO_01891/FPRO_06352/FPRO_02615/FPRO_04778/FPRO_08273/FPRO_09420/FPRO_09466	23
CC	GO:0005657	replication fork	20/866	67/3758	0.118911	0.769892	0.711973	FPRO_09159/FPRO_04827/FPRO_06020/FPRO_11070/FPRO_11799/FPRO_13085/FPRO_02586/FPRO_08259/FPRO_04771/FPRO_10984/FPRO_10729/FPRO_00736/FPRO_01311/FPRO_00767/FPRO_00740/FPRO_09138/FPRO_13052/FPRO_03133/FPRO_00954/FPRO_05958	20
CC	GO:0030119	AP-type membrane coat adaptor complex	5/866	12/3758	0.119616	0.769892	0.711973	FPRO_04244/FPRO_11644/FPRO_02471/FPRO_05899/FPRO_06260	5
BP	GO:0044550	secondary metabolite biosynthetic process	13/897	42/3903	0.147155	0.774215	0.710742	FPRO_14081/FPRO_13037/FPRO_02896/FPRO_08393/FPRO_07976/FPRO_00931/FPRO_09363/FPRO_14261/FPRO_14263/FPRO_13123/FPRO_00574/FPRO_13036/FPRO_14257	13
BP	GO:0072503	cellular divalent inorganic cation homeostasis	13/897	42/3903	0.147155	0.774215	0.710742	FPRO_05865/FPRO_13463/FPRO_08673/FPRO_03676/FPRO_13135/FPRO_12967/FPRO_04259/FPRO_10387/FPRO_13357/FPRO_07847/FPRO_04218/FPRO_01365/FPRO_03585	13
BP	GO:0000724	double-strand break repair via homologous recombination	21/897	73/3903	0.14815	0.7774	0.713667	FPRO_15682/FPRO_11211/FPRO_09440/FPRO_09539/FPRO_12785/FPRO_11070/FPRO_10574/FPRO_01114/FPRO_03022/FPRO_10953/FPRO_04672/FPRO_08259/FPRO_10729/FPRO_15929/FPRO_07858/FPRO_01165/FPRO_02777/FPRO_03133/FPRO_00954/FPRO_00797/FPRO_04265	21
BP	GO:0045333	cellular respiration	24/897	85/3903	0.150818	0.784674	0.720344	FPRO_06100/FPRO_09542/FPRO_04343/FPRO_03469/FPRO_04330/FPRO_03064/FPRO_08408/FPRO_03336/FPRO_01468/FPRO_07698/FPRO_07711/FPRO_00990/FPRO_08384/FPRO_08162/FPRO_04719/FPRO_13262/FPRO_03165/FPRO_09417/FPRO_04760/FPRO_01063/FPRO_04574/FPRO_01540/FPRO_10872/FPRO_00754	24
BP	GO:0006766	vitamin metabolic process	14/897	46/3903	0.151046	0.784674	0.720344	FPRO_03657/FPRO_08391/FPRO_13261/FPRO_00235/FPRO_13205/FPRO_07787/FPRO_09542/FPRO_16165/FPRO_09619/FPRO_00821/FPRO_09691/FPRO_04971/FPRO_02993/FPRO_05788	14
BP	GO:0006767	water-soluble vitamin metabolic process	14/897	46/3903	0.151046	0.784674	0.720344	FPRO_03657/FPRO_08391/FPRO_13261/FPRO_00235/FPRO_13205/FPRO_07787/FPRO_09542/FPRO_16165/FPRO_09619/FPRO_00821/FPRO_09691/FPRO_04971/FPRO_02993/FPRO_05788	14
BP	GO:0006813	potassium ion transport	7/897	20/3903	0.154712	0.784674	0.720344	FPRO_03676/FPRO_02447/FPRO_13135/FPRO_09015/FPRO_10387/FPRO_13930/FPRO_04955	7
BP	GO:0051278	fungal-type cell wall polysaccharide biosynthetic process	7/897	20/3903	0.154712	0.784674	0.720344	FPRO_00750/FPRO_07677/FPRO_05864/FPRO_03182/FPRO_13383/FPRO_08257/FPRO_00670	7
BP	GO:0019748	secondary metabolic process	16/897	54/3903	0.156915	0.784674	0.720344	FPRO_06531/FPRO_14081/FPRO_15719/FPRO_13037/FPRO_02896/FPRO_08393/FPRO_07976/FPRO_00931/FPRO_09363/FPRO_14261/FPRO_14263/FPRO_13123/FPRO_00574/FPRO_02082/FPRO_13036/FPRO_14257	16
BP	GO:0009092	homoserine metabolic process	5/897	13/3903	0.1578	0.784674	0.720344	FPRO_11021/FPRO_07727/FPRO_09489/FPRO_03390/FPRO_00772	5
BP	GO:0015846	polyamine transport	5/897	13/3903	0.1578	0.784674	0.720344	FPRO_01002/FPRO_12998/FPRO_15689/FPRO_15367/FPRO_15066	5
BP	GO:0034305	regulation of asexual sporulation	5/897	13/3903	0.1578	0.784674	0.720344	FPRO_14081/FPRO_01444/FPRO_07976/FPRO_04526/FPRO_00574	5
BP	GO:0036171	filamentous growth of a population of unicellular organisms in response to chemical stimulus	5/897	13/3903	0.1578	0.784674	0.720344	FPRO_02568/FPRO_05045/FPRO_06253/FPRO_11832/FPRO_06152	5
BP	GO:0042402	cellular biogenic amine catabolic process	5/897	13/3903	0.1578	0.784674	0.720344	FPRO_13261/FPRO_13202/FPRO_06721/FPRO_06590/FPRO_06340	5
BP	GO:0042744	hydrogen peroxide catabolic process	5/897	13/3903	0.1578	0.784674	0.720344	FPRO_00701/FPRO_14612/FPRO_05233/FPRO_06705/FPRO_15419	5
BP	GO:0043938	positive regulation of sporulation	5/897	13/3903	0.1578	0.784674	0.720344	FPRO_01444/FPRO_07976/FPRO_04526/FPRO_00574/FPRO_09466	5
BP	GO:0051055	negative regulation of lipid biosynthetic process	5/897	13/3903	0.1578	0.784674	0.720344	FPRO_05805/FPRO_06318/FPRO_06394/FPRO_10381/FPRO_07945	5
BP	GO:0051239	regulation of multicellular organismal process	5/897	13/3903	0.1578	0.784674	0.720344	FPRO_05045/FPRO_09700/FPRO_00592/FPRO_01444/FPRO_04526	5
BP	GO:0075306	regulation of conidium formation	5/897	13/3903	0.1578	0.784674	0.720344	FPRO_14081/FPRO_01444/FPRO_07976/FPRO_04526/FPRO_00574	5
BP	GO:0099022	vesicle tethering	5/897	13/3903	0.1578	0.784674	0.720344	FPRO_05969/FPRO_08523/FPRO_03069/FPRO_11888/FPRO_04758	5
BP	GO:1902047	polyamine transmembrane transport	5/897	13/3903	0.1578	0.784674	0.720344	FPRO_01002/FPRO_12998/FPRO_15689/FPRO_15367/FPRO_15066	5
BP	GO:1902296	DNA strand elongation involved in cell cycle DNA replication	5/897	13/3903	0.1578	0.784674	0.720344	FPRO_04771/FPRO_10729/FPRO_00740/FPRO_00954/FPRO_05958	5
BP	GO:1902319	DNA strand elongation involved in nuclear cell cycle DNA replication	5/897	13/3903	0.1578	0.784674	0.720344	FPRO_04771/FPRO_10729/FPRO_00740/FPRO_00954/FPRO_05958	5
BP	GO:1902983	DNA strand elongation involved in mitotic DNA replication	5/897	13/3903	0.1578	0.784674	0.720344	FPRO_04771/FPRO_10729/FPRO_00740/FPRO_00954/FPRO_05958	5
BP	GO:0003006	developmental process involved in reproduction	41/897	154/3903	0.159004	0.78673	0.722232	FPRO_05805/FPRO_09689/FPRO_09483/FPRO_05045/FPRO_06856/FPRO_10727/FPRO_05941/FPRO_04827/FPRO_01740/FPRO_06253/FPRO_04924/FPRO_09440/FPRO_01309/FPRO_07756/FPRO_01444/FPRO_10509/FPRO_07487/FPRO_07677/FPRO_07976/FPRO_08505/FPRO_00990/FPRO_06152/FPRO_04526/FPRO_13085/FPRO_08124/FPRO_03045/FPRO_08259/FPRO_10910/FPRO_10984/FPRO_09628/FPRO_15367/FPRO_07951/FPRO_07858/FPRO_04220/FPRO_00574/FPRO_00670/FPR…	41
BP	GO:0009116	nucleoside metabolic process	11/897	35/3903	0.160187	0.78673	0.722232	FPRO_10632/FPRO_05863/FPRO_06470/FPRO_02677/FPRO_02813/FPRO_05844/FPRO_08387/FPRO_06109/FPRO_02298/FPRO_10853/FPRO_00921	11
BP	GO:0030448	hyphal growth	11/897	35/3903	0.160187	0.78673	0.722232	FPRO_05082/FPRO_08456/FPRO_00750/FPRO_07982/FPRO_15322/FPRO_07677/FPRO_11205/FPRO_10903/FPRO_06152/FPRO_10408/FPRO_09628	11
BP	GO:0051098	regulation of binding	11/897	35/3903	0.160187	0.78673	0.722232	FPRO_04827/FPRO_10022/FPRO_01114/FPRO_01020/FPRO_06152/FPRO_02586/FPRO_11870/FPRO_06261/FPRO_13431/FPRO_07858/FPRO_02777	11
BP	GO:0071241	cellular response to inorganic substance	11/897	35/3903	0.160187	0.78673	0.722232	FPRO_05045/FPRO_10727/FPRO_12807/FPRO_11205/FPRO_08143/FPRO_02941/FPRO_02298/FPRO_00477/FPRO_06261/FPRO_04767/FPRO_15073	11
BP	GO:0006575	cellular modified amino acid metabolic process	18/897	62/3903	0.16089	0.788243	0.72362	FPRO_05805/FPRO_00664/FPRO_08499/FPRO_15017/FPRO_13205/FPRO_10632/FPRO_07787/FPRO_10599/FPRO_06318/FPRO_08147/FPRO_11832/FPRO_04967/FPRO_06050/FPRO_04545/FPRO_11680/FPRO_01587/FPRO_07803/FPRO_05788	18
CC	GO:0031310	intrinsic component of vacuolar membrane	7/866	19/3758	0.125291	0.792018	0.732434	FPRO_08673/FPRO_08089/FPRO_03217/FPRO_08225/FPRO_04588/FPRO_15073/FPRO_09402	7
MF	GO:0003887	DNA-directed DNA polymerase activity	6/780	13/3372	0.05724	0.796758	0.781939	FPRO_09159/FPRO_11862/FPRO_11799/FPRO_09138/FPRO_05958/FPRO_10735	6
MF	GO:0016884	carbon-nitrogen ligase activity, with glutamine as amido-N-donor	5/780	10/3372	0.0579097	0.796758	0.781939	FPRO_08109/FPRO_03098/FPRO_00732/FPRO_02869/FPRO_02992	5
BP	GO:0001505	regulation of neurotransmitter levels	8/897	24/3903	0.165813	0.802852	0.737032	FPRO_04421/FPRO_13202/FPRO_06590/FPRO_09324/FPRO_07874/FPRO_03129/FPRO_00487/FPRO_02935	8
BP	GO:0034975	protein folding in endoplasmic reticulum	8/897	24/3903	0.165813	0.802852	0.737032	FPRO_02526/FPRO_11015/FPRO_04335/FPRO_03667/FPRO_03469/FPRO_10778/FPRO_00577/FPRO_03511	8
BP	GO:0016311	dephosphorylation	29/897	106/3903	0.16591	0.802852	0.737032	FPRO_10827/FPRO_02532/FPRO_05941/FPRO_06100/FPRO_10814/FPRO_02362/FPRO_02456/FPRO_13241/FPRO_10509/FPRO_11949/FPRO_04173/FPRO_03022/FPRO_02640/FPRO_09456/FPRO_01387/FPRO_10829/FPRO_13399/FPRO_12048/FPRO_10984/FPRO_04279/FPRO_06403/FPRO_03120/FPRO_04746/FPRO_00387/FPRO_05260/FPRO_05728/FPRO_10611/FPRO_05919/FPRO_11694	29
BP	GO:0140352	export from cell	24/897	86/3903	0.165998	0.802852	0.737032	FPRO_15682/FPRO_08071/FPRO_03676/FPRO_01294/FPRO_13135/FPRO_12785/FPRO_10387/FPRO_11205/FPRO_04516/FPRO_09599/FPRO_03182/FPRO_04255/FPRO_08124/FPRO_08523/FPRO_03069/FPRO_04826/FPRO_11888/FPRO_02941/FPRO_07847/FPRO_02466/FPRO_02513/FPRO_04778/FPRO_04158/FPRO_09436	24
BP	GO:0034293	sexual sporulation	26/897	94/3903	0.166288	0.802852	0.737032	FPRO_05805/FPRO_09689/FPRO_09483/FPRO_05045/FPRO_06856/FPRO_10727/FPRO_05941/FPRO_01740/FPRO_01309/FPRO_07756/FPRO_10509/FPRO_07677/FPRO_00990/FPRO_13085/FPRO_08124/FPRO_03045/FPRO_10910/FPRO_09628/FPRO_15367/FPRO_07951/FPRO_04220/FPRO_00574/FPRO_00670/FPRO_13326/FPRO_05728/FPRO_09466	26
BP	GO:0043935	sexual sporulation resulting in formation of a cellular spore	26/897	94/3903	0.166288	0.802852	0.737032	FPRO_05805/FPRO_09689/FPRO_09483/FPRO_05045/FPRO_06856/FPRO_10727/FPRO_05941/FPRO_01740/FPRO_01309/FPRO_07756/FPRO_10509/FPRO_07677/FPRO_00990/FPRO_13085/FPRO_08124/FPRO_03045/FPRO_10910/FPRO_09628/FPRO_15367/FPRO_07951/FPRO_04220/FPRO_00574/FPRO_00670/FPRO_13326/FPRO_05728/FPRO_09466	26
BP	GO:0072507	divalent inorganic cation homeostasis	13/897	43/3903	0.169001	0.81398	0.747247	FPRO_05865/FPRO_13463/FPRO_08673/FPRO_03676/FPRO_13135/FPRO_12967/FPRO_04259/FPRO_10387/FPRO_13357/FPRO_07847/FPRO_04218/FPRO_01365/FPRO_03585	13
BP	GO:0031667	response to nutrient levels	58/897	225/3903	0.171908	0.816814	0.749849	FPRO_06401/FPRO_04421/FPRO_02568/FPRO_15412/FPRO_08120/FPRO_05057/FPRO_05045/FPRO_04151/FPRO_09700/FPRO_02532/FPRO_00592/FPRO_04054/FPRO_00812/FPRO_03676/FPRO_01086/FPRO_10022/FPRO_13037/FPRO_02896/FPRO_04924/FPRO_04267/FPRO_02559/FPRO_10387/FPRO_03937/FPRO_01132/FPRO_11832/FPRO_08143/FPRO_00931/FPRO_04672/FPRO_09599/FPRO_10598/FPRO_06152/FPRO_09441/FPRO_08135/FPRO_04545/FPRO_03217/FPRO_02941/FPR…	58
BP	GO:0016485	protein processing	14/897	47/3903	0.172158	0.816814	0.749849	FPRO_11227/FPRO_13463/FPRO_10727/FPRO_04841/FPRO_13426/FPRO_08453/FPRO_01468/FPRO_05969/FPRO_11832/FPRO_00931/FPRO_05789/FPRO_09310/FPRO_01540/FPRO_06165	14
BP	GO:0006506	GPI anchor biosynthetic process	9/897	28/3903	0.174181	0.816814	0.749849	FPRO_10708/FPRO_04130/FPRO_03632/FPRO_11988/FPRO_00814/FPRO_05963/FPRO_10657/FPRO_01607/FPRO_13298	9
BP	GO:0006874	cellular calcium ion homeostasis	9/897	28/3903	0.174181	0.816814	0.749849	FPRO_05865/FPRO_08673/FPRO_03676/FPRO_13135/FPRO_12967/FPRO_04259/FPRO_10387/FPRO_07847/FPRO_01365	9
BP	GO:0042398	cellular modified amino acid biosynthetic process	9/897	28/3903	0.174181	0.816814	0.749849	FPRO_13205/FPRO_07787/FPRO_10599/FPRO_06318/FPRO_11832/FPRO_04967/FPRO_04545/FPRO_01587/FPRO_05788	9
BP	GO:0006778	porphyrin-containing compound metabolic process	6/897	17/3903	0.176045	0.816814	0.749849	FPRO_03202/FPRO_00662/FPRO_08062/FPRO_04969/FPRO_10922/FPRO_00555	6
BP	GO:0009310	amine catabolic process	6/897	17/3903	0.176045	0.816814	0.749849	FPRO_13261/FPRO_13202/FPRO_06721/FPRO_06590/FPRO_06340/FPRO_09694	6
BP	GO:0030155	regulation of cell adhesion	6/897	17/3903	0.176045	0.816814	0.749849	FPRO_06253/FPRO_04924/FPRO_10574/FPRO_08564/FPRO_05887/FPRO_08257	6
BP	GO:0033013	tetrapyrrole metabolic process	6/897	17/3903	0.176045	0.816814	0.749849	FPRO_03202/FPRO_00662/FPRO_08062/FPRO_04969/FPRO_10922/FPRO_00555	6
BP	GO:0042278	purine nucleoside metabolic process	6/897	17/3903	0.176045	0.816814	0.749849	FPRO_10632/FPRO_02813/FPRO_05844/FPRO_02298/FPRO_10853/FPRO_00921	6
BP	GO:0032787	monocarboxylic acid metabolic process	46/897	176/3903	0.17659	0.816814	0.749849	FPRO_00079/FPRO_13261/FPRO_08120/FPRO_05057/FPRO_05699/FPRO_06098/FPRO_00503/FPRO_04151/FPRO_03149/FPRO_13205/FPRO_00592/FPRO_01513/FPRO_11833/FPRO_13436/FPRO_04342/FPRO_08109/FPRO_02896/FPRO_03195/FPRO_16165/FPRO_06394/FPRO_06340/FPRO_08211/FPRO_11056/FPRO_00931/FPRO_09769/FPRO_04926/FPRO_00477/FPRO_03129/FPRO_09437/FPRO_13262/FPRO_04849/FPRO_04451/FPRO_06193/FPRO_05207/FPRO_00437/FPRO_10929/FPR…	46
BP	GO:0045944	positive regulation of transcription by RNA polymerase II	53/897	205/3903	0.178548	0.816814	0.749849	FPRO_03657/FPRO_01666/FPRO_08120/FPRO_05045/FPRO_07827/FPRO_02531/FPRO_06253/FPRO_05984/FPRO_09595/FPRO_04924/FPRO_13354/FPRO_04702/FPRO_10610/FPRO_07982/FPRO_01444/FPRO_14612/FPRO_04173/FPRO_01020/FPRO_00460/FPRO_04672/FPRO_10381/FPRO_08564/FPRO_00412/FPRO_05085/FPRO_02933/FPRO_04683/FPRO_04842/FPRO_03466/FPRO_08135/FPRO_04545/FPRO_13282/FPRO_03427/FPRO_07945/FPRO_09518/FPRO_00477/FPRO_06261/FPR…	53
BP	GO:0006071	glycerol metabolic process	4/897	10/3903	0.178772	0.816814	0.749849	FPRO_02384/FPRO_05057/FPRO_14473/FPRO_14471	4
BP	GO:0034398	telomere tethering at nuclear periphery	4/897	10/3903	0.178772	0.816814	0.749849	FPRO_01114/FPRO_02933/FPRO_09503/FPRO_02642	4
BP	GO:0042177	negative regulation of protein catabolic process	4/897	10/3903	0.178772	0.816814	0.749849	FPRO_09440/FPRO_01662/FPRO_05260/FPRO_09436	4
BP	GO:0042776	proton motive force-driven mitochondrial ATP synthesis	4/897	10/3903	0.178772	0.816814	0.749849	FPRO_08384/FPRO_09417/FPRO_04760/FPRO_01063	4
BP	GO:0044406	adhesion of symbiont to host	4/897	10/3903	0.178772	0.816814	0.749849	FPRO_05057/FPRO_13463/FPRO_06253/FPRO_08437	4
BP	GO:0046134	pyrimidine nucleoside biosynthetic process	4/897	10/3903	0.178772	0.816814	0.749849	FPRO_05863/FPRO_06470/FPRO_02677/FPRO_08387	4
BP	GO:0051260	protein homooligomerization	4/897	10/3903	0.178772	0.816814	0.749849	FPRO_11205/FPRO_09628/FPRO_07858/FPRO_00797	4
BP	GO:0051643	endoplasmic reticulum localization	4/897	10/3903	0.178772	0.816814	0.749849	FPRO_04702/FPRO_09152/FPRO_09628/FPRO_04746	4
BP	GO:0061413	regulation of transcription from RNA polymerase II promoter by a nonfermentable carbon source	4/897	10/3903	0.178772	0.816814	0.749849	FPRO_08120/FPRO_08504/FPRO_15194/FPRO_15764	4
BP	GO:0061414	positive regulation of transcription from RNA polymerase II promoter by a nonfermentable carbon source	4/897	10/3903	0.178772	0.816814	0.749849	FPRO_08120/FPRO_08504/FPRO_15194/FPRO_15764	4
BP	GO:0048468	cell development	31/897	115/3903	0.179011	0.816814	0.749849	FPRO_09689/FPRO_00664/FPRO_09483/FPRO_05045/FPRO_06856/FPRO_14081/FPRO_10727/FPRO_05941/FPRO_01740/FPRO_01309/FPRO_07756/FPRO_15322/FPRO_01444/FPRO_10509/FPRO_07677/FPRO_07976/FPRO_10903/FPRO_00990/FPRO_04526/FPRO_08124/FPRO_03045/FPRO_10910/FPRO_09628/FPRO_15367/FPRO_07951/FPRO_05233/FPRO_00574/FPRO_00670/FPRO_13326/FPRO_05728/FPRO_09466	31
BP	GO:0051235	maintenance of location	18/897	63/3903	0.179548	0.817392	0.75038	FPRO_06323/FPRO_00589/FPRO_13463/FPRO_03676/FPRO_02526/FPRO_13135/FPRO_10387/FPRO_11205/FPRO_09152/FPRO_09271/FPRO_06261/FPRO_09628/FPRO_02968/FPRO_07847/FPRO_02883/FPRO_04218/FPRO_05221/FPRO_13312	18
BP	GO:0033108	mitochondrial respiratory chain complex assembly	10/897	32/3903	0.180589	0.820259	0.753012	FPRO_09669/FPRO_07711/FPRO_01068/FPRO_03235/FPRO_08212/FPRO_10988/FPRO_00370/FPRO_09205/FPRO_02865/FPRO_00754	10
BP	GO:0070085	glycosylation	20/897	71/3903	0.181167	0.821017	0.753708	FPRO_04742/FPRO_09770/FPRO_10545/FPRO_06021/FPRO_15254/FPRO_11293/FPRO_00259/FPRO_08456/FPRO_00750/FPRO_12967/FPRO_10708/FPRO_03064/FPRO_02666/FPRO_05864/FPRO_08173/FPRO_10572/FPRO_03006/FPRO_06165/FPRO_01101/FPRO_04517	20
BP	GO:0009100	glycoprotein metabolic process	23/897	83/3903	0.182013	0.822978	0.755508	FPRO_04742/FPRO_09770/FPRO_10545/FPRO_10650/FPRO_06021/FPRO_15254/FPRO_11293/FPRO_00259/FPRO_08456/FPRO_00750/FPRO_12967/FPRO_14280/FPRO_03064/FPRO_02666/FPRO_05864/FPRO_08173/FPRO_01733/FPRO_03686/FPRO_10572/FPRO_03006/FPRO_06165/FPRO_01101/FPRO_04517	23
MF	GO:0140030	modification-dependent protein binding	9/780	23/3372	0.0628804	0.836309	0.820754	FPRO_04924/FPRO_01662/FPRO_08143/FPRO_03063/FPRO_06123/FPRO_05002/FPRO_07945/FPRO_02883/FPRO_02513	9
BP	GO:0006271	DNA strand elongation involved in DNA replication	11/897	36/3903	0.18554	0.83703	0.768408	FPRO_02809/FPRO_11070/FPRO_11799/FPRO_04771/FPRO_10984/FPRO_10729/FPRO_01311/FPRO_00740/FPRO_03133/FPRO_00954/FPRO_05958	11
BP	GO:0006903	vesicle targeting	7/897	21/3903	0.188632	0.841047	0.772096	FPRO_06156/FPRO_05969/FPRO_08523/FPRO_03069/FPRO_11888/FPRO_02712/FPRO_04758	7
BP	GO:0042244	spore wall assembly	7/897	21/3903	0.188632	0.841047	0.772096	FPRO_09483/FPRO_06856/FPRO_01309/FPRO_07756/FPRO_10509/FPRO_10910/FPRO_15367	7
BP	GO:0071071	regulation of phospholipid biosynthetic process	7/897	21/3903	0.188632	0.841047	0.772096	FPRO_05805/FPRO_07694/FPRO_06318/FPRO_06394/FPRO_10381/FPRO_04545/FPRO_07945	7
BP	GO:0071966	fungal-type cell wall polysaccharide metabolic process	7/897	21/3903	0.188632	0.841047	0.772096	FPRO_00750/FPRO_07677/FPRO_05864/FPRO_03182/FPRO_13383/FPRO_08257/FPRO_00670	7
BP	GO:0007155	cell adhesion	12/897	40/3903	0.189383	0.841047	0.772096	FPRO_06401/FPRO_13463/FPRO_06253/FPRO_11293/FPRO_04924/FPRO_10574/FPRO_08143/FPRO_08564/FPRO_05887/FPRO_04271/FPRO_08257/FPRO_00364	12
BP	GO:0009110	vitamin biosynthetic process	12/897	40/3903	0.189383	0.841047	0.772096	FPRO_03657/FPRO_08391/FPRO_00235/FPRO_13205/FPRO_07787/FPRO_09542/FPRO_16165/FPRO_09619/FPRO_00821/FPRO_04971/FPRO_02993/FPRO_05788	12
BP	GO:0042364	water-soluble vitamin biosynthetic process	12/897	40/3903	0.189383	0.841047	0.772096	FPRO_03657/FPRO_08391/FPRO_00235/FPRO_13205/FPRO_07787/FPRO_09542/FPRO_16165/FPRO_09619/FPRO_00821/FPRO_04971/FPRO_02993/FPRO_05788	12
BP	GO:0030435	sporulation resulting in formation of a cellular spore	32/897	120/3903	0.192399	0.852543	0.782649	FPRO_00841/FPRO_05805/FPRO_09689/FPRO_09770/FPRO_09483/FPRO_05045/FPRO_06856/FPRO_10727/FPRO_05941/FPRO_01740/FPRO_14055/FPRO_01309/FPRO_07756/FPRO_07982/FPRO_01444/FPRO_10509/FPRO_07677/FPRO_00990/FPRO_13085/FPRO_08124/FPRO_03045/FPRO_10910/FPRO_00709/FPRO_09628/FPRO_15367/FPRO_07951/FPRO_04220/FPRO_00574/FPRO_00670/FPRO_13326/FPRO_05728/FPRO_09466	32
BP	GO:0032502	developmental process	80/897	319/3903	0.194366	0.859348	0.788896	FPRO_00841/FPRO_05805/FPRO_09689/FPRO_00664/FPRO_00079/FPRO_09770/FPRO_09483/FPRO_05045/FPRO_06856/FPRO_14081/FPRO_09723/FPRO_10727/FPRO_05941/FPRO_04827/FPRO_01740/FPRO_06253/FPRO_14055/FPRO_10022/FPRO_04924/FPRO_09440/FPRO_01309/FPRO_07756/FPRO_07982/FPRO_02456/FPRO_15322/FPRO_13332/FPRO_11070/FPRO_10574/FPRO_01444/FPRO_10509/FPRO_07487/FPRO_14612/FPRO_07677/FPRO_07976/FPRO_10941/FPRO_01372/FPR…	80
CC	GO:0071627	integral component of fungal-type vacuolar membrane	6/866	16/3758	0.141034	0.860792	0.796034	FPRO_08673/FPRO_03217/FPRO_08225/FPRO_04588/FPRO_15073/FPRO_09402	6
CC	GO:0071628	intrinsic component of fungal-type vacuolar membrane	6/866	16/3758	0.141034	0.860792	0.796034	FPRO_08673/FPRO_03217/FPRO_08225/FPRO_04588/FPRO_15073/FPRO_09402	6
BP	GO:0006633	fatty acid biosynthetic process	8/897	25/3903	0.197623	0.867883	0.796732	FPRO_04342/FPRO_02896/FPRO_06394/FPRO_04926/FPRO_00477/FPRO_04849/FPRO_05207/FPRO_10570	8
BP	GO:0009066	aspartate family amino acid metabolic process	16/897	56/3903	0.197702	0.867883	0.796732	FPRO_11021/FPRO_10632/FPRO_08458/FPRO_07727/FPRO_08109/FPRO_09489/FPRO_01751/FPRO_11056/FPRO_03390/FPRO_00772/FPRO_03120/FPRO_04474/FPRO_01204/FPRO_10929/FPRO_02935/FPRO_11834	16
BP	GO:0036180	filamentous growth of a population of unicellular organisms in response to biotic stimulus	16/897	56/3903	0.197702	0.867883	0.796732	FPRO_02568/FPRO_05057/FPRO_04151/FPRO_00592/FPRO_05941/FPRO_15453/FPRO_04267/FPRO_03937/FPRO_11832/FPRO_00931/FPRO_06152/FPRO_08135/FPRO_05887/FPRO_04545/FPRO_10408/FPRO_08437	16
BP	GO:0044264	cellular polysaccharide metabolic process	23/897	84/3903	0.199187	0.867883	0.796732	FPRO_02236/FPRO_15254/FPRO_00819/FPRO_00750/FPRO_15322/FPRO_13332/FPRO_04819/FPRO_07677/FPRO_05864/FPRO_02640/FPRO_13059/FPRO_03182/FPRO_13383/FPRO_09310/FPRO_12250/FPRO_10709/FPRO_08257/FPRO_03028/FPRO_00670/FPRO_11848/FPRO_01101/FPRO_05728/FPRO_06637	23
BP	GO:0010570	regulation of filamentous growth	19/897	68/3903	0.199614	0.867883	0.796732	FPRO_02568/FPRO_05045/FPRO_09700/FPRO_04981/FPRO_06253/FPRO_04924/FPRO_02390/FPRO_00962/FPRO_08143/FPRO_00931/FPRO_04672/FPRO_08135/FPRO_05887/FPRO_04545/FPRO_08504/FPRO_08257/FPRO_13305/FPRO_15764/FPRO_09694	19
BP	GO:0002790	peptide secretion	5/897	14/3903	0.20152	0.867883	0.796732	FPRO_08071/FPRO_01294/FPRO_11205/FPRO_04516/FPRO_02513	5
BP	GO:0006620	post-translational protein targeting to endoplasmic reticulum membrane	5/897	14/3903	0.20152	0.867883	0.796732	FPRO_05848/FPRO_11015/FPRO_02530/FPRO_03182/FPRO_09416	5
BP	GO:0009306	protein secretion	5/897	14/3903	0.20152	0.867883	0.796732	FPRO_08071/FPRO_01294/FPRO_11205/FPRO_04516/FPRO_02513	5
BP	GO:0015740	C4-dicarboxylate transport	5/897	14/3903	0.20152	0.867883	0.796732	FPRO_06607/FPRO_09347/FPRO_03217/FPRO_07716/FPRO_10849	5
BP	GO:0016239	positive regulation of macroautophagy	5/897	14/3903	0.20152	0.867883	0.796732	FPRO_06100/FPRO_03195/FPRO_08143/FPRO_08479/FPRO_13123	5
BP	GO:0035592	establishment of protein localization to extracellular region	5/897	14/3903	0.20152	0.867883	0.796732	FPRO_08071/FPRO_01294/FPRO_11205/FPRO_04516/FPRO_02513	5
BP	GO:0071692	protein localization to extracellular region	5/897	14/3903	0.20152	0.867883	0.796732	FPRO_08071/FPRO_01294/FPRO_11205/FPRO_04516/FPRO_02513	5
BP	GO:0006505	GPI anchor metabolic process	9/897	29/3903	0.204183	0.868103	0.796934	FPRO_10708/FPRO_04130/FPRO_03632/FPRO_11988/FPRO_00814/FPRO_05963/FPRO_10657/FPRO_01607/FPRO_13298	9
BP	GO:0007533	mating type switching	9/897	29/3903	0.204183	0.868103	0.796934	FPRO_04827/FPRO_06253/FPRO_04924/FPRO_09440/FPRO_08259/FPRO_10984/FPRO_07858/FPRO_00797/FPRO_09694	9
BP	GO:0009084	glutamine family amino acid biosynthetic process	9/897	29/3903	0.204183	0.868103	0.796934	FPRO_04421/FPRO_00812/FPRO_03098/FPRO_00732/FPRO_04980/FPRO_15504/FPRO_02992/FPRO_00487/FPRO_09694	9
BP	GO:0046148	pigment biosynthetic process	9/897	29/3903	0.204183	0.868103	0.796934	FPRO_11021/FPRO_03202/FPRO_01636/FPRO_07787/FPRO_00662/FPRO_08062/FPRO_04969/FPRO_10922/FPRO_00555	9
BP	GO:0055074	calcium ion homeostasis	9/897	29/3903	0.204183	0.868103	0.796934	FPRO_05865/FPRO_08673/FPRO_03676/FPRO_13135/FPRO_12967/FPRO_04259/FPRO_10387/FPRO_07847/FPRO_01365	9
BP	GO:1990700	nucleolar chromatin organization	9/897	29/3903	0.204183	0.868103	0.796934	FPRO_04596/FPRO_10574/FPRO_11164/FPRO_08135/FPRO_03427/FPRO_08437/FPRO_05260/FPRO_13123/FPRO_02777	9
MF	GO:0015174	basic amino acid transmembrane transporter activity	7/780	17/3372	0.0750683	0.871641	0.855429	FPRO_15345/FPRO_03217/FPRO_11123/FPRO_04588/FPRO_10679/FPRO_06640/FPRO_09402	7
MF	GO:0016874	ligase activity	29/780	98/3372	0.0807412	0.871641	0.855429	FPRO_00079/FPRO_00503/FPRO_13205/FPRO_07787/FPRO_08109/FPRO_02896/FPRO_03098/FPRO_02390/FPRO_05939/FPRO_06470/FPRO_00732/FPRO_04538/FPRO_04967/FPRO_05585/FPRO_02869/FPRO_07881/FPRO_02298/FPRO_13000/FPRO_03697/FPRO_11960/FPRO_09437/FPRO_01419/FPRO_01587/FPRO_05780/FPRO_09297/FPRO_02992/FPRO_05207/FPRO_10828/FPRO_08519	29
MF	GO:0034061	DNA polymerase activity	6/780	14/3372	0.081199	0.871641	0.855429	FPRO_09159/FPRO_11862/FPRO_11799/FPRO_09138/FPRO_05958/FPRO_10735	6
MF	GO:0016705	oxidoreductase activity, acting on paired donors, with incorporation or reduction of molecular oxygen	11/780	31/3372	0.0814016	0.871641	0.855429	FPRO_02842/FPRO_02568/FPRO_08475/FPRO_08494/FPRO_10599/FPRO_11940/FPRO_10529/FPRO_00962/FPRO_07626/FPRO_13305/FPRO_14257	11
MF	GO:0016772	transferase activity, transferring phosphorus-containing groups	67/780	249/3372	0.0837658	0.871641	0.855429	FPRO_01461/FPRO_10527/FPRO_05777/FPRO_09770/FPRO_04151/FPRO_09700/FPRO_09182/FPRO_09159/FPRO_11862/FPRO_13436/FPRO_06021/FPRO_12202/FPRO_07727/FPRO_09357/FPRO_05984/FPRO_04161/FPRO_10022/FPRO_02390/FPRO_13354/FPRO_09716/FPRO_06318/FPRO_00611/FPRO_05863/FPRO_07982/FPRO_02456/FPRO_03195/FPRO_02559/FPRO_11799/FPRO_03064/FPRO_06094/FPRO_09619/FPRO_07588/FPRO_08143/FPRO_10903/FPRO_05844/FPRO_03390/FPR…	67
MF	GO:0022853	active ion transmembrane transporter activity	25/780	83/3372	0.0838976	0.871641	0.855429	FPRO_15412/FPRO_06607/FPRO_11655/FPRO_00501/FPRO_06531/FPRO_08673/FPRO_04054/FPRO_03676/FPRO_07710/FPRO_13829/FPRO_05939/FPRO_13135/FPRO_09015/FPRO_13638/FPRO_04343/FPRO_09347/FPRO_04155/FPRO_10387/FPRO_09283/FPRO_00802/FPRO_04826/FPRO_04613/FPRO_07716/FPRO_03585/FPRO_11603	25
MF	GO:0015203	polyamine transmembrane transporter activity	5/780	11/3372	0.0865342	0.871641	0.855429	FPRO_01002/FPRO_12998/FPRO_15689/FPRO_15367/FPRO_15066	5
MF	GO:0016709	oxidoreductase activity, acting on paired donors, with incorporation or reduction of molecular oxygen, NAD(P)H as one donor, and incorporation of one atom of oxygen	5/780	11/3372	0.0865342	0.871641	0.855429	FPRO_02842/FPRO_02568/FPRO_00962/FPRO_13305/FPRO_14257	5
MF	GO:0070566	adenylyltransferase activity	5/780	11/3372	0.0865342	0.871641	0.855429	FPRO_09182/FPRO_04161/FPRO_02390/FPRO_07588/FPRO_01808	5
MF	GO:0015295	solute:proton symporter activity	8/780	21/3372	0.0895671	0.871641	0.855429	FPRO_15412/FPRO_06607/FPRO_04054/FPRO_13829/FPRO_04155/FPRO_09283/FPRO_07716/FPRO_03585	8
MF	GO:0015932	nucleobase-containing compound transmembrane transporter activity	8/780	21/3372	0.0895671	0.871641	0.855429	FPRO_07710/FPRO_08456/FPRO_04155/FPRO_09283/FPRO_04642/FPRO_04351/FPRO_01542/FPRO_07847	8
BP	GO:0048646	anatomical structure formation involved in morphogenesis	33/897	125/3903	0.205749	0.872902	0.801339	FPRO_00841/FPRO_05805/FPRO_09689/FPRO_09770/FPRO_09483/FPRO_05045/FPRO_06856/FPRO_10727/FPRO_05941/FPRO_01740/FPRO_14055/FPRO_01309/FPRO_07756/FPRO_07982/FPRO_01444/FPRO_10509/FPRO_07677/FPRO_00990/FPRO_06152/FPRO_13085/FPRO_08124/FPRO_03045/FPRO_10910/FPRO_00709/FPRO_09628/FPRO_15367/FPRO_07951/FPRO_04220/FPRO_00574/FPRO_00670/FPRO_13326/FPRO_05728/FPRO_09466	33
BP	GO:0022413	reproductive process in single-celled organism	32/897	121/3903	0.207045	0.876534	0.804673	FPRO_09689/FPRO_09483/FPRO_05045/FPRO_06856/FPRO_10727/FPRO_05941/FPRO_04827/FPRO_01740/FPRO_06253/FPRO_10925/FPRO_04924/FPRO_09440/FPRO_01309/FPRO_07756/FPRO_10509/FPRO_07677/FPRO_00990/FPRO_06152/FPRO_08124/FPRO_03045/FPRO_08259/FPRO_10910/FPRO_10984/FPRO_09628/FPRO_15367/FPRO_07951/FPRO_07858/FPRO_00670/FPRO_00797/FPRO_05728/FPRO_09466/FPRO_09694	32
MF	GO:0042887	amide transmembrane transporter activity	9/780	25/3372	0.10141	0.87884	0.862494	FPRO_05007/FPRO_14295/FPRO_09283/FPRO_04351/FPRO_08212/FPRO_09663/FPRO_04588/FPRO_04158/FPRO_15073	9
MF	GO:0016757	glycosyltransferase activity	23/780	77/3372	0.102119	0.87884	0.862494	FPRO_02984/FPRO_04742/FPRO_02236/FPRO_01636/FPRO_05941/FPRO_15254/FPRO_11293/FPRO_00259/FPRO_02362/FPRO_10708/FPRO_15322/FPRO_03103/FPRO_04819/FPRO_07677/FPRO_02666/FPRO_08173/FPRO_13059/FPRO_06050/FPRO_08387/FPRO_00573/FPRO_03028/FPRO_03006/FPRO_11848	23
MF	GO:0005261	cation channel activity	8/780	22/3372	0.113474	0.87884	0.862494	FPRO_11655/FPRO_05865/FPRO_12998/FPRO_15689/FPRO_05939/FPRO_04259/FPRO_07847/FPRO_01365	8
MF	GO:0016620	oxidoreductase activity, acting on the aldehyde or oxo group of donors, NAD or NADP as acceptor	8/780	22/3372	0.113474	0.87884	0.862494	FPRO_13202/FPRO_01513/FPRO_00812/FPRO_09489/FPRO_06590/FPRO_09381/FPRO_06193/FPRO_00437	8
MF	GO:0016407	acetyltransferase activity	17/780	55/3372	0.113614	0.87884	0.862494	FPRO_06323/FPRO_06721/FPRO_04981/FPRO_01020/FPRO_13177/FPRO_03466/FPRO_09100/FPRO_00084/FPRO_02722/FPRO_13123/FPRO_14251/FPRO_09138/FPRO_06324/FPRO_02082/FPRO_03948/FPRO_02464/FPRO_13221	17
MF	GO:0008094	ATP-dependent activity, acting on DNA	18/780	59/3372	0.116869	0.87884	0.862494	FPRO_05837/FPRO_02809/FPRO_04924/FPRO_09440/FPRO_02251/FPRO_11164/FPRO_08263/FPRO_04771/FPRO_11870/FPRO_10729/FPRO_01311/FPRO_04812/FPRO_15929/FPRO_00740/FPRO_12044/FPRO_00954/FPRO_00797/FPRO_04265	18
MF	GO:0015291	secondary active transmembrane transporter activity	19/780	63/3372	0.119725	0.87884	0.862494	FPRO_15412/FPRO_06607/FPRO_11655/FPRO_00501/FPRO_07088/FPRO_06531/FPRO_04054/FPRO_03594/FPRO_04144/FPRO_07710/FPRO_13829/FPRO_09015/FPRO_13638/FPRO_09347/FPRO_04155/FPRO_09283/FPRO_07716/FPRO_03585/FPRO_11603	19
MF	GO:0004029	aldehyde dehydrogenase (NAD+) activity	5/780	12/3372	0.121143	0.87884	0.862494	FPRO_13202/FPRO_01513/FPRO_06590/FPRO_09381/FPRO_00437	5
MF	GO:0004030	aldehyde dehydrogenase [NAD(P)+] activity	5/780	12/3372	0.121143	0.87884	0.862494	FPRO_13202/FPRO_01513/FPRO_06590/FPRO_09381/FPRO_00437	5
MF	GO:0004620	phospholipase activity	5/780	12/3372	0.121143	0.87884	0.862494	FPRO_15017/FPRO_13081/FPRO_03361/FPRO_08124/FPRO_11680	5
MF	GO:0015079	potassium ion transmembrane transporter activity	5/780	12/3372	0.121143	0.87884	0.862494	FPRO_03676/FPRO_13135/FPRO_09015/FPRO_10387/FPRO_04955	5
MF	GO:0015215	nucleotide transmembrane transporter activity	5/780	12/3372	0.121143	0.87884	0.862494	FPRO_07710/FPRO_09283/FPRO_04351/FPRO_01542/FPRO_07847	5
MF	GO:0016780	phosphotransferase activity, for other substituted phosphate groups	5/780	12/3372	0.121143	0.87884	0.862494	FPRO_06318/FPRO_03064/FPRO_06094/FPRO_10657/FPRO_08449	5
MF	GO:0031593	polyubiquitin modification-dependent protein binding	5/780	12/3372	0.121143	0.87884	0.862494	FPRO_01662/FPRO_08143/FPRO_06123/FPRO_07945/FPRO_02513	5
MF	GO:0022804	active transmembrane transporter activity	36/780	130/3372	0.125719	0.890603	0.874038	FPRO_15682/FPRO_15412/FPRO_06607/FPRO_11655/FPRO_00501/FPRO_07088/FPRO_06531/FPRO_08673/FPRO_04054/FPRO_03676/FPRO_03594/FPRO_04144/FPRO_07710/FPRO_13829/FPRO_05939/FPRO_13135/FPRO_09015/FPRO_00388/FPRO_12785/FPRO_13638/FPRO_04343/FPRO_09347/FPRO_04155/FPRO_10387/FPRO_03336/FPRO_09283/FPRO_09411/FPRO_00802/FPRO_04826/FPRO_04613/FPRO_07716/FPRO_13262/FPRO_03585/FPRO_04158/FPRO_15073/FPRO_11603	36
MF	GO:0005310	dicarboxylic acid transmembrane transporter activity	7/780	19/3372	0.127229	0.890603	0.874038	FPRO_06607/FPRO_09499/FPRO_09347/FPRO_03217/FPRO_04351/FPRO_07716/FPRO_10849	7
CC	GO:0031520	plasma membrane of cell tip	7/866	20/3758	0.156355	0.894356	0.827073	FPRO_15412/FPRO_07088/FPRO_04054/FPRO_14295/FPRO_04560/FPRO_07847/FPRO_10679	7
CC	GO:0005628	prospore membrane	15/866	50/3758	0.156788	0.894356	0.827073	FPRO_05805/FPRO_09483/FPRO_10610/FPRO_06394/FPRO_06152/FPRO_08124/FPRO_08523/FPRO_03069/FPRO_03045/FPRO_11888/FPRO_02471/FPRO_09628/FPRO_08257/FPRO_00670/FPRO_09466	15
CC	GO:0005680	anaphase-promoting complex	5/866	13/3758	0.159165	0.894356	0.827073	FPRO_05808/FPRO_10910/FPRO_11010/FPRO_00910/FPRO_01559	5
CC	GO:0005753	mitochondrial proton-transporting ATP synthase complex	5/866	13/3758	0.159165	0.894356	0.827073	FPRO_05939/FPRO_08384/FPRO_09417/FPRO_04760/FPRO_03223	5
CC	GO:0045259	proton-transporting ATP synthase complex	5/866	13/3758	0.159165	0.894356	0.827073	FPRO_05939/FPRO_08384/FPRO_09417/FPRO_04760/FPRO_03223	5
BP	GO:0016052	carbohydrate catabolic process	28/897	105/3903	0.211972	0.895493	0.822078	FPRO_05057/FPRO_10545/FPRO_05699/FPRO_04151/FPRO_06014/FPRO_00592/FPRO_13436/FPRO_01043/FPRO_04924/FPRO_01140/FPRO_09930/FPRO_03195/FPRO_08211/FPRO_13941/FPRO_08143/FPRO_04672/FPRO_09769/FPRO_03679/FPRO_12250/FPRO_00294/FPRO_14224/FPRO_03028/FPRO_10572/FPRO_06193/FPRO_06991/FPRO_07997/FPRO_13312/FPRO_06637	28
BP	GO:0045595	regulation of cell differentiation	11/897	37/3903	0.212602	0.896254	0.822777	FPRO_05805/FPRO_14081/FPRO_06253/FPRO_04924/FPRO_01444/FPRO_07976/FPRO_04526/FPRO_07951/FPRO_00574/FPRO_09466/FPRO_09694	11
BP	GO:0051604	protein maturation	26/897	97/3903	0.214213	0.89639	0.822901	FPRO_11227/FPRO_13463/FPRO_10727/FPRO_04841/FPRO_11055/FPRO_08068/FPRO_13426/FPRO_08453/FPRO_14280/FPRO_01468/FPRO_05969/FPRO_11832/FPRO_00931/FPRO_12794/FPRO_05789/FPRO_01733/FPRO_01760/FPRO_01068/FPRO_09310/FPRO_09324/FPRO_04717/FPRO_03073/FPRO_09297/FPRO_06324/FPRO_01540/FPRO_06165	26
BP	GO:1901657	glycosyl compound metabolic process	12/897	41/3903	0.215231	0.89639	0.822901	FPRO_10632/FPRO_05863/FPRO_06470/FPRO_02677/FPRO_06269/FPRO_02813/FPRO_05844/FPRO_08387/FPRO_06109/FPRO_02298/FPRO_10853/FPRO_00921	12
BP	GO:0008535	respiratory chain complex IV assembly	6/897	18/3903	0.215784	0.89639	0.822901	FPRO_01068/FPRO_03235/FPRO_10988/FPRO_00370/FPRO_09205/FPRO_02865	6
BP	GO:0009404	toxin metabolic process	6/897	18/3903	0.215784	0.89639	0.822901	FPRO_14081/FPRO_08393/FPRO_07976/FPRO_00574/FPRO_02082/FPRO_14257	6
BP	GO:0010508	positive regulation of autophagy	6/897	18/3903	0.215784	0.89639	0.822901	FPRO_06100/FPRO_03195/FPRO_08143/FPRO_08479/FPRO_01661/FPRO_13123	6
BP	GO:0033617	mitochondrial cytochrome c oxidase assembly	6/897	18/3903	0.215784	0.89639	0.822901	FPRO_01068/FPRO_03235/FPRO_10988/FPRO_00370/FPRO_09205/FPRO_02865	6
BP	GO:0051031	tRNA transport	6/897	18/3903	0.215784	0.89639	0.822901	FPRO_01372/FPRO_09503/FPRO_04796/FPRO_07811/FPRO_09277/FPRO_11950	6
BP	GO:0040008	regulation of growth	24/897	89/3903	0.21623	0.89639	0.822901	FPRO_02568/FPRO_05045/FPRO_09700/FPRO_04981/FPRO_06253/FPRO_10022/FPRO_04924/FPRO_02390/FPRO_02456/FPRO_00962/FPRO_08143/FPRO_00931/FPRO_04672/FPRO_08135/FPRO_05887/FPRO_04545/FPRO_07945/FPRO_08504/FPRO_13265/FPRO_08257/FPRO_13305/FPRO_15764/FPRO_03375/FPRO_09694	24
BP	GO:1902969	mitotic DNA replication	20/897	73/3903	0.219234	0.905404	0.831176	FPRO_11862/FPRO_09440/FPRO_06020/FPRO_11070/FPRO_11799/FPRO_10953/FPRO_02586/FPRO_08259/FPRO_04771/FPRO_10984/FPRO_10729/FPRO_00736/FPRO_00767/FPRO_07858/FPRO_00740/FPRO_05043/FPRO_13052/FPRO_00954/FPRO_00797/FPRO_05958	20
BP	GO:0010876	lipid localization	15/897	53/3903	0.219313	0.905404	0.831176	FPRO_05805/FPRO_06323/FPRO_15682/FPRO_00589/FPRO_08071/FPRO_07694/FPRO_04702/FPRO_00388/FPRO_12785/FPRO_06394/FPRO_03353/FPRO_09628/FPRO_09437/FPRO_08452/FPRO_04778	15
BP	GO:0019953	sexual reproduction	54/897	213/3903	0.221444	0.912311	0.837518	FPRO_14009/FPRO_06401/FPRO_05805/FPRO_09689/FPRO_09483/FPRO_05045/FPRO_15017/FPRO_06856/FPRO_14081/FPRO_10727/FPRO_05941/FPRO_01740/FPRO_10925/FPRO_11211/FPRO_10022/FPRO_01309/FPRO_13354/FPRO_10813/FPRO_07756/FPRO_08453/FPRO_10991/FPRO_02559/FPRO_10509/FPRO_07487/FPRO_07677/FPRO_08505/FPRO_00990/FPRO_06152/FPRO_04526/FPRO_03182/FPRO_13085/FPRO_08124/FPRO_03045/FPRO_10910/FPRO_04717/FPRO_06403/FPR…	54
BP	GO:0000727	double-strand break repair via break-induced replication	7/897	22/3903	0.225233	0.916638	0.841489	FPRO_11070/FPRO_10953/FPRO_08259/FPRO_10729/FPRO_07858/FPRO_03133/FPRO_00954	7
BP	GO:0000731	DNA synthesis involved in DNA repair	7/897	22/3903	0.225233	0.916638	0.841489	FPRO_09159/FPRO_11862/FPRO_01411/FPRO_08263/FPRO_10984/FPRO_09138/FPRO_05958	7
BP	GO:0006857	oligopeptide transport	7/897	22/3903	0.225233	0.916638	0.841489	FPRO_06531/FPRO_05007/FPRO_14295/FPRO_09663/FPRO_00755/FPRO_04158/FPRO_15073	7
BP	GO:0009651	response to salt stress	7/897	22/3903	0.225233	0.916638	0.841489	FPRO_01513/FPRO_03676/FPRO_12793/FPRO_10387/FPRO_03120/FPRO_00387/FPRO_03375	7
BP	GO:0044088	regulation of vacuole organization	7/897	22/3903	0.225233	0.916638	0.841489	FPRO_00592/FPRO_10727/FPRO_06100/FPRO_05969/FPRO_01661/FPRO_01891/FPRO_04758	7
BP	GO:0007275	multicellular organism development	8/897	26/3903	0.231676	0.916638	0.841489	FPRO_00664/FPRO_05045/FPRO_01444/FPRO_07976/FPRO_08143/FPRO_08505/FPRO_04526/FPRO_13326	8
BP	GO:0015718	monocarboxylic acid transport	8/897	26/3903	0.231676	0.916638	0.841489	FPRO_15412/FPRO_04054/FPRO_07710/FPRO_00388/FPRO_10849/FPRO_09437/FPRO_04588/FPRO_09402	8
BP	GO:0043244	regulation of protein-containing complex disassembly	8/897	26/3903	0.231676	0.916638	0.841489	FPRO_06100/FPRO_03195/FPRO_04439/FPRO_08085/FPRO_06152/FPRO_08135/FPRO_08112/FPRO_05221	8
BP	GO:0051101	regulation of DNA binding	8/897	26/3903	0.231676	0.916638	0.841489	FPRO_04827/FPRO_01114/FPRO_01020/FPRO_02586/FPRO_11870/FPRO_06261/FPRO_07858/FPRO_02777	8
BP	GO:0051648	vesicle localization	8/897	26/3903	0.231676	0.916638	0.841489	FPRO_06156/FPRO_05206/FPRO_05969/FPRO_08523/FPRO_03069/FPRO_11888/FPRO_02712/FPRO_04758	8
BP	GO:0051650	establishment of vesicle localization	8/897	26/3903	0.231676	0.916638	0.841489	FPRO_06156/FPRO_05206/FPRO_05969/FPRO_08523/FPRO_03069/FPRO_11888/FPRO_02712/FPRO_04758	8
BP	GO:0097064	ncRNA export from nucleus	8/897	26/3903	0.231676	0.916638	0.841489	FPRO_01266/FPRO_09503/FPRO_04796/FPRO_11162/FPRO_07811/FPRO_09277/FPRO_06206/FPRO_11950	8
BP	GO:0005978	glycogen biosynthetic process	4/897	11/3903	0.232607	0.916638	0.841489	FPRO_04819/FPRO_13059/FPRO_11848/FPRO_01101	4
BP	GO:0006067	ethanol metabolic process	4/897	11/3903	0.232607	0.916638	0.841489	FPRO_01513/FPRO_06340/FPRO_11056/FPRO_13262	4
BP	GO:0006560	proline metabolic process	4/897	11/3903	0.232607	0.916638	0.841489	FPRO_00812/FPRO_04980/FPRO_15504/FPRO_10707	4
BP	GO:0006595	polyamine metabolic process	4/897	11/3903	0.232607	0.916638	0.841489	FPRO_13202/FPRO_06721/FPRO_06590/FPRO_05788	4
BP	GO:0010992	ubiquitin recycling	4/897	11/3903	0.232607	0.916638	0.841489	FPRO_05980/FPRO_03342/FPRO_08263/FPRO_09436	4
BP	GO:0034087	establishment of mitotic sister chromatid cohesion	4/897	11/3903	0.232607	0.916638	0.841489	FPRO_01114/FPRO_11870/FPRO_09138/FPRO_02777	4
BP	GO:0046839	phospholipid dephosphorylation	4/897	11/3903	0.232607	0.916638	0.841489	FPRO_10827/FPRO_10509/FPRO_04746/FPRO_05919	4
BP	GO:0071168	protein localization to chromatin	4/897	11/3903	0.232607	0.916638	0.841489	FPRO_01114/FPRO_08135/FPRO_11870/FPRO_02777	4
BP	GO:0071709	membrane assembly	4/897	11/3903	0.232607	0.916638	0.841489	FPRO_03045/FPRO_09628/FPRO_05728/FPRO_09466	4
BP	GO:1903826	L-arginine transmembrane transport	4/897	11/3903	0.232607	0.916638	0.841489	FPRO_15345/FPRO_03217/FPRO_10679/FPRO_09402	4
BP	GO:0009086	methionine biosynthetic process	9/897	30/3903	0.236117	0.923853	0.848113	FPRO_11021/FPRO_08458/FPRO_07727/FPRO_09489/FPRO_03390/FPRO_00772/FPRO_03120/FPRO_04474/FPRO_11834	9
BP	GO:0009311	oligosaccharide metabolic process	9/897	30/3903	0.236117	0.923853	0.848113	FPRO_05941/FPRO_04924/FPRO_02362/FPRO_10778/FPRO_08143/FPRO_04672/FPRO_00574/FPRO_01101/FPRO_06637	9
BP	GO:0016973	poly(A)+ mRNA export from nucleus	9/897	30/3903	0.236117	0.923853	0.848113	FPRO_01077/FPRO_02933/FPRO_09503/FPRO_04796/FPRO_08135/FPRO_00798/FPRO_07724/FPRO_08074/FPRO_00395	9
BP	GO:0016310	phosphorylation	78/897	315/3903	0.236291	0.923853	0.848113	FPRO_10527/FPRO_05777/FPRO_05057/FPRO_08071/FPRO_05699/FPRO_04151/FPRO_09700/FPRO_00592/FPRO_13436/FPRO_06021/FPRO_01427/FPRO_12202/FPRO_07727/FPRO_06100/FPRO_09357/FPRO_05984/FPRO_04161/FPRO_10022/FPRO_13354/FPRO_00611/FPRO_05863/FPRO_07982/FPRO_02456/FPRO_03195/FPRO_04343/FPRO_02559/FPRO_14612/FPRO_08211/FPRO_01468/FPRO_07698/FPRO_11059/FPRO_09619/FPRO_08143/FPRO_07711/FPRO_10903/FPRO_05844/FPR…	78
MF	GO:0140097	catalytic activity, acting on DNA	31/780	111/3372	0.135468	0.931928	0.914595	FPRO_01460/FPRO_02525/FPRO_05837/FPRO_09159/FPRO_10385/FPRO_11862/FPRO_02809/FPRO_04924/FPRO_09440/FPRO_02251/FPRO_01423/FPRO_11164/FPRO_11799/FPRO_08263/FPRO_04771/FPRO_11870/FPRO_10984/FPRO_10729/FPRO_01311/FPRO_04812/FPRO_15929/FPRO_07858/FPRO_00740/FPRO_09138/FPRO_05043/FPRO_12044/FPRO_00954/FPRO_00797/FPRO_05958/FPRO_04265/FPRO_10735	31
CC	GO:0031166	integral component of vacuolar membrane	6/866	17/3758	0.177698	0.93748	0.866953	FPRO_08673/FPRO_03217/FPRO_08225/FPRO_04588/FPRO_15073/FPRO_09402	6
CC	GO:0005747	mitochondrial respiratory chain complex I	4/866	10/3758	0.180081	0.93748	0.866953	FPRO_03336/FPRO_03105/FPRO_09411/FPRO_04719	4
CC	GO:0030964	NADH dehydrogenase complex	4/866	10/3758	0.180081	0.93748	0.866953	FPRO_03336/FPRO_03105/FPRO_09411/FPRO_04719	4
CC	GO:0031160	spore wall	4/866	10/3758	0.180081	0.93748	0.866953	FPRO_09483/FPRO_06856/FPRO_01309/FPRO_05233	4
CC	GO:0045271	respiratory chain complex I	4/866	10/3758	0.180081	0.93748	0.866953	FPRO_03336/FPRO_03105/FPRO_09411/FPRO_04719	4
BP	GO:0000097	sulfur amino acid biosynthetic process	11/897	38/3903	0.241187	0.94115	0.863992	FPRO_11021/FPRO_08458/FPRO_07727/FPRO_10599/FPRO_09489/FPRO_08393/FPRO_03390/FPRO_00772/FPRO_03120/FPRO_04474/FPRO_11834	11
BP	GO:0006664	glycolipid metabolic process	12/897	42/3903	0.242461	0.942433	0.865169	FPRO_13459/FPRO_06098/FPRO_08494/FPRO_10708/FPRO_04130/FPRO_03632/FPRO_11988/FPRO_00814/FPRO_05963/FPRO_10657/FPRO_01607/FPRO_13298	12
BP	GO:1903509	liposaccharide metabolic process	12/897	42/3903	0.242461	0.942433	0.865169	FPRO_13459/FPRO_06098/FPRO_08494/FPRO_10708/FPRO_04130/FPRO_03632/FPRO_11988/FPRO_00814/FPRO_05963/FPRO_10657/FPRO_01607/FPRO_13298	12
MF	GO:0015085	calcium ion transmembrane transporter activity	8/780	23/3372	0.140457	0.949874	0.932207	FPRO_05865/FPRO_08673/FPRO_03676/FPRO_13135/FPRO_04259/FPRO_10387/FPRO_07847/FPRO_01365	8
BP	GO:0042743	hydrogen peroxide metabolic process	5/897	15/3903	0.248688	0.957303	0.878821	FPRO_00701/FPRO_14612/FPRO_05233/FPRO_06705/FPRO_15419	5
BP	GO:0045861	negative regulation of proteolysis	5/897	15/3903	0.248688	0.957303	0.878821	FPRO_13463/FPRO_09440/FPRO_05260/FPRO_09436/FPRO_11941	5
BP	GO:0046471	phosphatidylglycerol metabolic process	5/897	15/3903	0.248688	0.957303	0.878821	FPRO_05805/FPRO_07694/FPRO_06394/FPRO_10872/FPRO_08449	5
BP	GO:0046835	carbohydrate phosphorylation	5/897	15/3903	0.248688	0.957303	0.878821	FPRO_12202/FPRO_03195/FPRO_09769/FPRO_10572/FPRO_13312	5
BP	GO:1903664	regulation of asexual reproduction	5/897	15/3903	0.248688	0.957303	0.878821	FPRO_14081/FPRO_01444/FPRO_07976/FPRO_04526/FPRO_00574	5
CC	GO:0031261	DNA replication preinitiation complex	7/866	21/3758	0.190534	0.977523	0.903983	FPRO_06020/FPRO_10953/FPRO_02586/FPRO_08259/FPRO_00736/FPRO_13052/FPRO_00954	7
BP	GO:0006970	response to osmotic stress	22/897	83/3903	0.256992	0.979487	0.899186	FPRO_02384/FPRO_15017/FPRO_00592/FPRO_05941/FPRO_01513/FPRO_03676/FPRO_10022/FPRO_12793/FPRO_10574/FPRO_08085/FPRO_10387/FPRO_10941/FPRO_01372/FPRO_12794/FPRO_15561/FPRO_05836/FPRO_11680/FPRO_07847/FPRO_03120/FPRO_00387/FPRO_06193/FPRO_03375	22
BP	GO:0006284	base-excision repair	6/897	19/3903	0.258189	0.979487	0.899186	FPRO_01460/FPRO_11862/FPRO_04924/FPRO_01423/FPRO_10984/FPRO_05958	6
BP	GO:0019627	urea metabolic process	6/897	19/3903	0.258189	0.979487	0.899186	FPRO_03098/FPRO_00732/FPRO_14968/FPRO_04461/FPRO_03129/FPRO_02992	6
BP	GO:0036003	positive regulation of transcription from RNA polymerase II promoter in response to stress	6/897	19/3903	0.258189	0.979487	0.899186	FPRO_04924/FPRO_14612/FPRO_03427/FPRO_00477/FPRO_06261/FPRO_09694	6
BP	GO:0046173	polyol biosynthetic process	6/897	19/3903	0.258189	0.979487	0.899186	FPRO_02384/FPRO_08103/FPRO_02456/FPRO_04545/FPRO_07626/FPRO_03317	6
BP	GO:0055088	lipid homeostasis	6/897	19/3903	0.258189	0.979487	0.899186	FPRO_00589/FPRO_02532/FPRO_09056/FPRO_00477/FPRO_08105/FPRO_04778	6
BP	GO:0071103	DNA conformation change	28/897	108/3903	0.26326	0.979487	0.899186	FPRO_02809/FPRO_04924/FPRO_09440/FPRO_02251/FPRO_11164/FPRO_01114/FPRO_10953/FPRO_03063/FPRO_12047/FPRO_13085/FPRO_08135/FPRO_02586/FPRO_07989/FPRO_08263/FPRO_04771/FPRO_01575/FPRO_04840/FPRO_10729/FPRO_00767/FPRO_15929/FPRO_07858/FPRO_11010/FPRO_05043/FPRO_12044/FPRO_01165/FPRO_02777/FPRO_00954/FPRO_09295	28
BP	GO:0031445	regulation of heterochromatin formation	7/897	23/3903	0.264018	0.979487	0.899186	FPRO_08505/FPRO_13085/FPRO_08135/FPRO_03427/FPRO_05260/FPRO_13123/FPRO_05958	7
BP	GO:0120261	regulation of heterochromatin organization	7/897	23/3903	0.264018	0.979487	0.899186	FPRO_08505/FPRO_13085/FPRO_08135/FPRO_03427/FPRO_05260/FPRO_13123/FPRO_05958	7
BP	GO:0009266	response to temperature stimulus	17/897	63/3903	0.265526	0.979487	0.899186	FPRO_11021/FPRO_09700/FPRO_05941/FPRO_10589/FPRO_01427/FPRO_10022/FPRO_01372/FPRO_10778/FPRO_01132/FPRO_03427/FPRO_00477/FPRO_07724/FPRO_00387/FPRO_05233/FPRO_15419/FPRO_04767/FPRO_03375	17
BP	GO:0009636	response to toxic substance	27/897	104/3903	0.265595	0.979487	0.899186	FPRO_00664/FPRO_15682/FPRO_08499/FPRO_14081/FPRO_05941/FPRO_09673/FPRO_05122/FPRO_12807/FPRO_13037/FPRO_00701/FPRO_12785/FPRO_14612/FPRO_01372/FPRO_13357/FPRO_03158/FPRO_11774/FPRO_04612/FPRO_04451/FPRO_05233/FPRO_02082/FPRO_15142/FPRO_06705/FPRO_15419/FPRO_15073/FPRO_07803/FPRO_11694/FPRO_14257	27
BP	GO:0009408	response to heat	16/897	59/3903	0.266978	0.979487	0.899186	FPRO_11021/FPRO_09700/FPRO_05941/FPRO_10589/FPRO_01427/FPRO_10022/FPRO_01372/FPRO_10778/FPRO_01132/FPRO_03427/FPRO_07724/FPRO_00387/FPRO_05233/FPRO_15419/FPRO_04767/FPRO_03375	16
BP	GO:0015748	organophosphate ester transport	16/897	59/3903	0.266978	0.979487	0.899186	FPRO_14174/FPRO_05805/FPRO_15682/FPRO_08071/FPRO_07710/FPRO_07694/FPRO_12785/FPRO_06394/FPRO_09599/FPRO_09283/FPRO_02941/FPRO_04351/FPRO_01542/FPRO_07847/FPRO_08452/FPRO_09436	16
BP	GO:0044036	cell wall macromolecule metabolic process	16/897	59/3903	0.266978	0.979487	0.899186	FPRO_04742/FPRO_02236/FPRO_09770/FPRO_10650/FPRO_15254/FPRO_00819/FPRO_11293/FPRO_00750/FPRO_15322/FPRO_07677/FPRO_05864/FPRO_03182/FPRO_13383/FPRO_10709/FPRO_08257/FPRO_00670	16
BP	GO:0006816	calcium ion transport	8/897	27/3903	0.267589	0.979487	0.899186	FPRO_05865/FPRO_08673/FPRO_03676/FPRO_13135/FPRO_04259/FPRO_10387/FPRO_07847/FPRO_01365	8
BP	GO:0006862	nucleotide transport	8/897	27/3903	0.267589	0.979487	0.899186	FPRO_07710/FPRO_09599/FPRO_09283/FPRO_02941/FPRO_04351/FPRO_01542/FPRO_07847/FPRO_09436	8
BP	GO:0009303	rRNA transcription	8/897	27/3903	0.267589	0.979487	0.899186	FPRO_13358/FPRO_04890/FPRO_10587/FPRO_10022/FPRO_00460/FPRO_13084/FPRO_03158/FPRO_13085	8
BP	GO:0043937	regulation of sporulation	8/897	27/3903	0.267589	0.979487	0.899186	FPRO_05805/FPRO_14081/FPRO_01444/FPRO_07976/FPRO_04526/FPRO_07951/FPRO_00574/FPRO_09466	8
BP	GO:0070588	calcium ion transmembrane transport	8/897	27/3903	0.267589	0.979487	0.899186	FPRO_05865/FPRO_08673/FPRO_03676/FPRO_13135/FPRO_04259/FPRO_10387/FPRO_07847/FPRO_01365	8
BP	GO:0072593	reactive oxygen species metabolic process	8/897	27/3903	0.267589	0.979487	0.899186	FPRO_08499/FPRO_00701/FPRO_14612/FPRO_07874/FPRO_05233/FPRO_06193/FPRO_06705/FPRO_15419	8
BP	GO:1903725	regulation of phospholipid metabolic process	8/897	27/3903	0.267589	0.979487	0.899186	FPRO_05805/FPRO_07694/FPRO_06318/FPRO_06394/FPRO_10381/FPRO_04545/FPRO_07945/FPRO_04746	8
BP	GO:0065004	protein-DNA complex assembly	26/897	100/3903	0.267948	0.979487	0.899186	FPRO_04890/FPRO_06020/FPRO_13283/FPRO_01557/FPRO_01020/FPRO_10953/FPRO_08505/FPRO_05085/FPRO_13085/FPRO_03466/FPRO_08135/FPRO_02586/FPRO_07989/FPRO_08259/FPRO_01575/FPRO_00736/FPRO_03129/FPRO_13431/FPRO_08074/FPRO_07858/FPRO_05260/FPRO_13123/FPRO_13052/FPRO_01165/FPRO_00797/FPRO_05958	26
BP	GO:0071897	DNA biosynthetic process	15/897	55/3903	0.268287	0.979487	0.899186	FPRO_09159/FPRO_11862/FPRO_01411/FPRO_11799/FPRO_00460/FPRO_03342/FPRO_08263/FPRO_10984/FPRO_10729/FPRO_07858/FPRO_09138/FPRO_05043/FPRO_03133/FPRO_05958/FPRO_10735	15
BP	GO:0000045	autophagosome assembly	9/897	31/3903	0.269678	0.979487	0.899186	FPRO_07721/FPRO_08479/FPRO_00577/FPRO_10705/FPRO_01661/FPRO_04684/FPRO_08430/FPRO_05728/FPRO_09466	9
BP	GO:0000282	cellular bud site selection	9/897	31/3903	0.269678	0.979487	0.899186	FPRO_05082/FPRO_07982/FPRO_07487/FPRO_04560/FPRO_06152/FPRO_13383/FPRO_00421/FPRO_11091/FPRO_13113	9
BP	GO:0007029	endoplasmic reticulum organization	9/897	31/3903	0.269678	0.979487	0.899186	FPRO_05848/FPRO_04702/FPRO_06152/FPRO_04526/FPRO_09152/FPRO_02869/FPRO_03069/FPRO_09628/FPRO_04746	9
BP	GO:0007530	sex determination	9/897	31/3903	0.269678	0.979487	0.899186	FPRO_04827/FPRO_06253/FPRO_04924/FPRO_09440/FPRO_08259/FPRO_10984/FPRO_07858/FPRO_00797/FPRO_09694	9
BP	GO:0007531	mating type determination	9/897	31/3903	0.269678	0.979487	0.899186	FPRO_04827/FPRO_06253/FPRO_04924/FPRO_09440/FPRO_08259/FPRO_10984/FPRO_07858/FPRO_00797/FPRO_09694	9
BP	GO:0042440	pigment metabolic process	9/897	31/3903	0.269678	0.979487	0.899186	FPRO_11021/FPRO_03202/FPRO_01636/FPRO_07787/FPRO_00662/FPRO_08062/FPRO_04969/FPRO_10922/FPRO_00555	9
BP	GO:0045165	cell fate commitment	9/897	31/3903	0.269678	0.979487	0.899186	FPRO_04827/FPRO_06253/FPRO_04924/FPRO_09440/FPRO_08259/FPRO_10984/FPRO_07858/FPRO_00797/FPRO_09694	9
BP	GO:1905037	autophagosome organization	9/897	31/3903	0.269678	0.979487	0.899186	FPRO_07721/FPRO_08479/FPRO_00577/FPRO_10705/FPRO_01661/FPRO_04684/FPRO_08430/FPRO_05728/FPRO_09466	9
BP	GO:0042710	biofilm formation	10/897	35/3903	0.270747	0.981037	0.900609	FPRO_06401/FPRO_01028/FPRO_12998/FPRO_06253/FPRO_11293/FPRO_04924/FPRO_10574/FPRO_08143/FPRO_05887/FPRO_04778	10
BP	GO:0022616	DNA strand elongation	11/897	39/3903	0.271089	0.981037	0.900609	FPRO_02809/FPRO_11070/FPRO_11799/FPRO_04771/FPRO_10984/FPRO_10729/FPRO_01311/FPRO_00740/FPRO_03133/FPRO_00954/FPRO_05958	11
MF	GO:0052689	carboxylic ester hydrolase activity	13/780	42/3372	0.152555	0.994353	0.975859	FPRO_01104/FPRO_15017/FPRO_10650/FPRO_05122/FPRO_06496/FPRO_05823/FPRO_13941/FPRO_11680/FPRO_02435/FPRO_04849/FPRO_14534/FPRO_03169/FPRO_04358	13
MF	GO:0016614	oxidoreductase activity, acting on CH-OH group of donors	24/780	85/3372	0.158489	0.994353	0.975859	FPRO_02384/FPRO_00664/FPRO_13985/FPRO_01466/FPRO_14272/FPRO_04208/FPRO_06496/FPRO_05186/FPRO_11056/FPRO_03521/FPRO_03163/FPRO_07903/FPRO_03390/FPRO_03679/FPRO_06176/FPRO_09691/FPRO_00746/FPRO_03317/FPRO_00437/FPRO_14473/FPRO_06991/FPRO_09715/FPRO_10570/FPRO_07997	24
MF	GO:0016903	oxidoreductase activity, acting on the aldehyde or oxo group of donors	10/780	31/3372	0.158904	0.994353	0.975859	FPRO_13202/FPRO_01513/FPRO_00812/FPRO_09489/FPRO_06590/FPRO_09381/FPRO_06176/FPRO_06193/FPRO_00437/FPRO_00348	10
MF	GO:0017025	TBP-class protein binding	5/780	13/3372	0.161083	0.994353	0.975859	FPRO_04890/FPRO_13283/FPRO_01020/FPRO_00412/FPRO_03466	5
MF	GO:1901474	azole transmembrane transporter activity	5/780	13/3372	0.161083	0.994353	0.975859	FPRO_15682/FPRO_07088/FPRO_12785/FPRO_15345/FPRO_03217	5
MF	GO:0008080	N-acetyltransferase activity	12/780	39/3372	0.1707	0.994353	0.975859	FPRO_06323/FPRO_06721/FPRO_04981/FPRO_13177/FPRO_03466/FPRO_09100/FPRO_02722/FPRO_13123/FPRO_14251/FPRO_09138/FPRO_06324/FPRO_03948	12
MF	GO:0000217	DNA secondary structure binding	6/780	17/3372	0.18002	0.994353	0.975859	FPRO_10385/FPRO_04827/FPRO_08263/FPRO_11870/FPRO_04812/FPRO_00797	6
MF	GO:0015605	organophosphate ester transmembrane transporter activity	6/780	17/3372	0.18002	0.994353	0.975859	FPRO_14174/FPRO_07710/FPRO_09283/FPRO_04351/FPRO_01542/FPRO_07847	6
MF	GO:0016278	lysine N-methyltransferase activity	6/780	17/3372	0.18002	0.994353	0.975859	FPRO_08119/FPRO_06386/FPRO_09202/FPRO_03063/FPRO_10830/FPRO_05263	6
MF	GO:0016279	protein-lysine N-methyltransferase activity	6/780	17/3372	0.18002	0.994353	0.975859	FPRO_08119/FPRO_06386/FPRO_09202/FPRO_03063/FPRO_10830/FPRO_05263	6
MF	GO:1904680	peptide transmembrane transporter activity	6/780	17/3372	0.18002	0.994353	0.975859	FPRO_05007/FPRO_14295/FPRO_08212/FPRO_09663/FPRO_04158/FPRO_15073	6
MF	GO:0005388	P-type calcium transporter activity	4/780	10/3372	0.181924	0.994353	0.975859	FPRO_08673/FPRO_03676/FPRO_13135/FPRO_10387	4
MF	GO:0016646	oxidoreductase activity, acting on the CH-NH group of donors, NAD or NADP as acceptor	4/780	10/3372	0.181924	0.994353	0.975859	FPRO_00812/FPRO_07787/FPRO_04980/FPRO_04474	4
MF	GO:0035251	UDP-glucosyltransferase activity	4/780	10/3372	0.181924	0.994353	0.975859	FPRO_05941/FPRO_02362/FPRO_04819/FPRO_11848	4
BP	GO:0044703	multi-organism reproductive process	36/897	142/3903	0.276519	0.998876	0.916985	FPRO_06401/FPRO_09689/FPRO_09483/FPRO_05045/FPRO_15017/FPRO_06856/FPRO_10727/FPRO_05941/FPRO_01740/FPRO_10925/FPRO_11211/FPRO_01309/FPRO_07756/FPRO_10509/FPRO_07487/FPRO_07677/FPRO_08505/FPRO_00990/FPRO_06152/FPRO_04526/FPRO_03182/FPRO_13085/FPRO_08124/FPRO_03045/FPRO_10910/FPRO_09628/FPRO_15367/FPRO_07951/FPRO_11680/FPRO_04220/FPRO_00574/FPRO_00670/FPRO_15419/FPRO_13326/FPRO_05728/FPRO_09466	36
MF	GO:0015294	solute:cation symporter activity	8/780	25/3372	0.202726	1	0.981401	FPRO_15412/FPRO_06607/FPRO_04054/FPRO_13829/FPRO_04155/FPRO_09283/FPRO_07716/FPRO_03585	8
MF	GO:0016758	hexosyltransferase activity	16/780	56/3372	0.205187	1	0.981401	FPRO_04742/FPRO_05941/FPRO_15254/FPRO_11293/FPRO_00259/FPRO_02362/FPRO_10708/FPRO_15322/FPRO_04819/FPRO_07677/FPRO_02666/FPRO_08173/FPRO_13059/FPRO_03028/FPRO_03006/FPRO_11848	16
MF	GO:0008270	zinc ion binding	29/780	108/3372	0.205398	1	0.981401	FPRO_03657/FPRO_08120/FPRO_11021/FPRO_13463/FPRO_06856/FPRO_09440/FPRO_01309/FPRO_04439/FPRO_08211/FPRO_08062/FPRO_01468/FPRO_01020/FPRO_09619/FPRO_09310/FPRO_05002/FPRO_00376/FPRO_08504/FPRO_15194/FPRO_10572/FPRO_00755/FPRO_11031/FPRO_15764/FPRO_10669/FPRO_10995/FPRO_03912/FPRO_00219/FPRO_01540/FPRO_09420/FPRO_04265	29
MF	GO:0004497	monooxygenase activity	5/780	14/3372	0.205463	1	0.981401	FPRO_02842/FPRO_02568/FPRO_00962/FPRO_13305/FPRO_14257	5
MF	GO:0015556	C4-dicarboxylate transmembrane transporter activity	5/780	14/3372	0.205463	1	0.981401	FPRO_06607/FPRO_09347/FPRO_03217/FPRO_07716/FPRO_10849	5
MF	GO:0019200	carbohydrate kinase activity	5/780	14/3372	0.205463	1	0.981401	FPRO_12202/FPRO_03195/FPRO_09769/FPRO_10572/FPRO_13312	5
MF	GO:0046527	glucosyltransferase activity	5/780	14/3372	0.205463	1	0.981401	FPRO_05941/FPRO_02362/FPRO_04819/FPRO_02666/FPRO_11848	5
MF	GO:0051537	2 iron, 2 sulfur cluster binding	5/780	14/3372	0.205463	1	0.981401	FPRO_02456/FPRO_12794/FPRO_07874/FPRO_06261/FPRO_00348	5
MF	GO:0003678	DNA helicase activity	9/780	29/3372	0.209762	1	0.981401	FPRO_04924/FPRO_09440/FPRO_02251/FPRO_08263/FPRO_04771/FPRO_10729/FPRO_15929/FPRO_12044/FPRO_00954	9
MF	GO:0015078	proton transmembrane transporter activity	14/780	49/3372	0.225899	1	0.981401	FPRO_15412/FPRO_06607/FPRO_06531/FPRO_04054/FPRO_13829/FPRO_05939/FPRO_09015/FPRO_04343/FPRO_04155/FPRO_09283/FPRO_00802/FPRO_04613/FPRO_07716/FPRO_03585	14
MF	GO:0016616	oxidoreductase activity, acting on the CH-OH group of donors, NAD or NADP as acceptor	20/780	73/3372	0.22828	1	0.981401	FPRO_02384/FPRO_00664/FPRO_13985/FPRO_01466/FPRO_14272/FPRO_04208/FPRO_06496/FPRO_05186/FPRO_11056/FPRO_03521/FPRO_03163/FPRO_07903/FPRO_03390/FPRO_03679/FPRO_06176/FPRO_00746/FPRO_03317/FPRO_00437/FPRO_06991/FPRO_07997	20
MF	GO:0019842	vitamin binding	7/780	22/3372	0.230414	1	0.981401	FPRO_01417/FPRO_07902/FPRO_04107/FPRO_00772/FPRO_10707/FPRO_03141/FPRO_03028	7
MF	GO:0004197	cysteine-type endopeptidase activity	4/780	11/3372	0.236433	1	0.981401	FPRO_08453/FPRO_04130/FPRO_11988/FPRO_09436	4
MF	GO:0008081	phosphoric diester hydrolase activity	4/780	11/3372	0.236433	1	0.981401	FPRO_02525/FPRO_03361/FPRO_09441/FPRO_08124	4
MF	GO:0019863	IgE binding	4/780	11/3372	0.236433	1	0.981401	FPRO_13216/FPRO_00592/FPRO_14280/FPRO_01733	4
MF	GO:0019865	immunoglobulin binding	4/780	11/3372	0.236433	1	0.981401	FPRO_13216/FPRO_00592/FPRO_14280/FPRO_01733	4
MF	GO:0015293	symporter activity	8/780	26/3372	0.237369	1	0.981401	FPRO_15412/FPRO_06607/FPRO_04054/FPRO_13829/FPRO_04155/FPRO_09283/FPRO_07716/FPRO_03585	8
MF	GO:0015267	channel activity	9/780	30/3372	0.242272	1	0.981401	FPRO_11655/FPRO_05865/FPRO_12998/FPRO_01740/FPRO_15689/FPRO_05939/FPRO_04259/FPRO_07847/FPRO_01365	9
MF	GO:0022803	passive transmembrane transporter activity	9/780	30/3372	0.242272	1	0.981401	FPRO_11655/FPRO_05865/FPRO_12998/FPRO_01740/FPRO_15689/FPRO_05939/FPRO_04259/FPRO_07847/FPRO_01365	9
MF	GO:0001216	DNA-binding transcription activator activity	12/780	42/3372	0.249795	1	0.981401	FPRO_03657/FPRO_08120/FPRO_06253/FPRO_08564/FPRO_04683/FPRO_08504/FPRO_15194/FPRO_04354/FPRO_15764/FPRO_04257/FPRO_09694/FPRO_00568	12
MF	GO:0001228	DNA-binding transcription activator activity, RNA polymerase II-specific	12/780	42/3372	0.249795	1	0.981401	FPRO_03657/FPRO_08120/FPRO_06253/FPRO_08564/FPRO_04683/FPRO_08504/FPRO_15194/FPRO_04354/FPRO_15764/FPRO_04257/FPRO_09694/FPRO_00568	12
MF	GO:0003697	single-stranded DNA binding	13/780	46/3372	0.250834	1	0.981401	FPRO_02525/FPRO_07787/FPRO_11799/FPRO_10953/FPRO_08569/FPRO_11903/FPRO_10729/FPRO_07858/FPRO_03133/FPRO_00797/FPRO_05958/FPRO_09295/FPRO_01117	13
MF	GO:0000287	magnesium ion binding	5/780	15/3372	0.253255	1	0.981401	FPRO_05777/FPRO_07902/FPRO_09456/FPRO_04842/FPRO_13115	5
MF	GO:0004722	protein serine/threonine phosphatase activity	5/780	15/3372	0.253255	1	0.981401	FPRO_06100/FPRO_03022/FPRO_02640/FPRO_01387/FPRO_12048	5
MF	GO:0030170	pyridoxal phosphate binding	6/780	19/3372	0.263387	1	0.981401	FPRO_01417/FPRO_07902/FPRO_00772/FPRO_10707/FPRO_03141/FPRO_03028	6
MF	GO:0070279	vitamin B6 binding	6/780	19/3372	0.263387	1	0.981401	FPRO_01417/FPRO_07902/FPRO_00772/FPRO_10707/FPRO_03141/FPRO_03028	6
MF	GO:0005524	ATP binding	53/780	211/3372	0.264165	1	0.981401	FPRO_05777/FPRO_15682/FPRO_04430/FPRO_05837/FPRO_09700/FPRO_08673/FPRO_07787/FPRO_13436/FPRO_12202/FPRO_02809/FPRO_04924/FPRO_13354/FPRO_07902/FPRO_11015/FPRO_02251/FPRO_07982/FPRO_02456/FPRO_12785/FPRO_03195/FPRO_02559/FPRO_00732/FPRO_08118/FPRO_01372/FPRO_11205/FPRO_10778/FPRO_06094/FPRO_08143/FPRO_03182/FPRO_06109/FPRO_02586/FPRO_10705/FPRO_11930/FPRO_04613/FPRO_11903/FPRO_13000/FPRO_13355/FPR…	53
MF	GO:0015926	glucosidase activity	7/780	23/3372	0.269769	1	0.981401	FPRO_06401/FPRO_10473/FPRO_05864/FPRO_06269/FPRO_02462/FPRO_12250/FPRO_06637	7
MF	GO:0042803	protein homodimerization activity	7/780	23/3372	0.269769	1	0.981401	FPRO_00664/FPRO_10545/FPRO_08109/FPRO_07902/FPRO_11205/FPRO_09599/FPRO_10922	7
MF	GO:0005216	ion channel activity	8/780	27/3372	0.273837	1	0.981401	FPRO_11655/FPRO_05865/FPRO_12998/FPRO_15689/FPRO_05939/FPRO_04259/FPRO_07847/FPRO_01365	8
MF	GO:0042802	identical protein binding	10/780	35/3372	0.277862	1	0.981401	FPRO_00664/FPRO_10545/FPRO_08109/FPRO_07902/FPRO_11205/FPRO_09599/FPRO_10922/FPRO_10707/FPRO_07858/FPRO_00797	10
MF	GO:0016410	N-acyltransferase activity	13/780	47/3372	0.278501	1	0.981401	FPRO_06323/FPRO_06721/FPRO_04981/FPRO_04969/FPRO_13177/FPRO_03466/FPRO_09100/FPRO_02722/FPRO_13123/FPRO_14251/FPRO_09138/FPRO_06324/FPRO_03948	13
MF	GO:0032559	adenyl ribonucleotide binding	54/780	217/3372	0.288126	1	0.981401	FPRO_05777/FPRO_00079/FPRO_15682/FPRO_04430/FPRO_05837/FPRO_09700/FPRO_08673/FPRO_07787/FPRO_13436/FPRO_12202/FPRO_02809/FPRO_04924/FPRO_13354/FPRO_07902/FPRO_11015/FPRO_02251/FPRO_07982/FPRO_02456/FPRO_12785/FPRO_03195/FPRO_02559/FPRO_00732/FPRO_08118/FPRO_01372/FPRO_11205/FPRO_10778/FPRO_06094/FPRO_08143/FPRO_03182/FPRO_06109/FPRO_02586/FPRO_10705/FPRO_11930/FPRO_04613/FPRO_11903/FPRO_13000/FPR…	54
MF	GO:0022890	inorganic cation transmembrane transporter activity	29/780	113/3372	0.291466	1	0.981401	FPRO_15412/FPRO_06607/FPRO_11655/FPRO_05865/FPRO_06531/FPRO_08673/FPRO_12998/FPRO_04054/FPRO_03676/FPRO_15689/FPRO_11605/FPRO_13829/FPRO_05939/FPRO_10745/FPRO_13135/FPRO_09015/FPRO_04259/FPRO_04343/FPRO_04155/FPRO_10387/FPRO_09283/FPRO_04955/FPRO_00802/FPRO_04613/FPRO_07716/FPRO_07847/FPRO_04218/FPRO_01365/FPRO_03585	29
MF	GO:0003690	double-stranded DNA binding	41/780	163/3372	0.293518	1	0.981401	FPRO_03657/FPRO_07194/FPRO_08120/FPRO_02525/FPRO_13358/FPRO_10385/FPRO_04827/FPRO_06253/FPRO_04924/FPRO_06020/FPRO_01020/FPRO_00460/FPRO_10953/FPRO_08564/FPRO_00412/FPRO_07903/FPRO_04683/FPRO_04545/FPRO_02586/FPRO_11870/FPRO_02298/FPRO_11903/FPRO_00736/FPRO_08504/FPRO_15194/FPRO_13431/FPRO_04812/FPRO_07858/FPRO_04354/FPRO_15764/FPRO_13052/FPRO_03912/FPRO_04257/FPRO_00395/FPRO_02777/FPRO_03133/FPR…	41
MF	GO:0015101	organic cation transmembrane transporter activity	4/780	12/3372	0.294078	1	0.981401	FPRO_07088/FPRO_12998/FPRO_15689/FPRO_13015	4
MF	GO:0000987	cis-regulatory region sequence-specific DNA binding	18/780	68/3372	0.297231	1	0.981401	FPRO_03657/FPRO_07194/FPRO_08120/FPRO_06253/FPRO_00460/FPRO_08564/FPRO_00412/FPRO_04683/FPRO_04545/FPRO_08504/FPRO_15194/FPRO_13431/FPRO_04354/FPRO_15764/FPRO_03912/FPRO_04257/FPRO_09694/FPRO_00568	18
MF	GO:0000978	RNA polymerase II cis-regulatory region sequence-specific DNA binding	17/780	64/3372	0.299345	1	0.981401	FPRO_03657/FPRO_07194/FPRO_08120/FPRO_06253/FPRO_00460/FPRO_08564/FPRO_00412/FPRO_04683/FPRO_04545/FPRO_08504/FPRO_15194/FPRO_04354/FPRO_15764/FPRO_03912/FPRO_04257/FPRO_09694/FPRO_00568	17
MF	GO:0016645	oxidoreductase activity, acting on the CH-NH group of donors	5/780	16/3372	0.303381	1	0.981401	FPRO_00812/FPRO_07787/FPRO_04980/FPRO_15504/FPRO_04474	5
MF	GO:0016763	pentosyltransferase activity	5/780	16/3372	0.303381	1	0.981401	FPRO_01636/FPRO_03103/FPRO_06050/FPRO_08387/FPRO_00573	5
MF	GO:0008194	UDP-glycosyltransferase activity	6/780	20/3372	0.30827	1	0.981401	FPRO_05941/FPRO_02362/FPRO_15322/FPRO_04819/FPRO_07677/FPRO_11848	6
MF	GO:0140296	general transcription initiation factor binding	6/780	20/3372	0.30827	1	0.981401	FPRO_04890/FPRO_13283/FPRO_01020/FPRO_00412/FPRO_03466/FPRO_13431	6
MF	GO:0016209	antioxidant activity	8/780	28/3372	0.311707	1	0.981401	FPRO_08499/FPRO_09673/FPRO_00701/FPRO_14612/FPRO_05233/FPRO_15142/FPRO_06705/FPRO_15419	8
MF	GO:0030554	adenyl nucleotide binding	54/780	219/3372	0.315314	1	0.981401	FPRO_05777/FPRO_00079/FPRO_15682/FPRO_04430/FPRO_05837/FPRO_09700/FPRO_08673/FPRO_07787/FPRO_13436/FPRO_12202/FPRO_02809/FPRO_04924/FPRO_13354/FPRO_07902/FPRO_11015/FPRO_02251/FPRO_07982/FPRO_02456/FPRO_12785/FPRO_03195/FPRO_02559/FPRO_00732/FPRO_08118/FPRO_01372/FPRO_11205/FPRO_10778/FPRO_06094/FPRO_08143/FPRO_03182/FPRO_06109/FPRO_02586/FPRO_10705/FPRO_11930/FPRO_04613/FPRO_11903/FPRO_13000/FPR…	54
MF	GO:0046914	transition metal ion binding	37/780	148/3372	0.321197	1	0.981401	FPRO_03657/FPRO_02842/FPRO_08475/FPRO_08120/FPRO_11021/FPRO_08494/FPRO_13463/FPRO_01466/FPRO_09879/FPRO_06856/FPRO_11055/FPRO_09440/FPRO_01309/FPRO_10529/FPRO_04439/FPRO_08211/FPRO_08062/FPRO_01468/FPRO_01020/FPRO_09619/FPRO_01068/FPRO_09310/FPRO_05002/FPRO_00376/FPRO_08504/FPRO_15194/FPRO_10572/FPRO_00755/FPRO_11031/FPRO_15764/FPRO_10669/FPRO_10995/FPRO_03912/FPRO_00219/FPRO_01540/FPRO_09420/FPR…	37
MF	GO:0008134	transcription factor binding	14/780	53/3372	0.333394	1	0.981401	FPRO_04890/FPRO_02531/FPRO_04924/FPRO_13283/FPRO_01444/FPRO_01020/FPRO_04672/FPRO_00412/FPRO_03466/FPRO_04545/FPRO_07945/FPRO_13431/FPRO_09436/FPRO_09694	14
MF	GO:0046872	metal ion binding	50/780	204/3372	0.341938	1	0.981401	FPRO_14009/FPRO_03657/FPRO_05777/FPRO_02842/FPRO_08475/FPRO_08120/FPRO_11021/FPRO_08494/FPRO_05865/FPRO_13463/FPRO_01466/FPRO_09879/FPRO_06856/FPRO_08673/FPRO_10599/FPRO_11055/FPRO_09440/FPRO_01309/FPRO_07902/FPRO_01140/FPRO_10529/FPRO_04439/FPRO_08211/FPRO_08062/FPRO_13357/FPRO_01468/FPRO_01020/FPRO_09619/FPRO_01132/FPRO_09456/FPRO_04842/FPRO_13115/FPRO_01068/FPRO_06123/FPRO_09310/FPRO_05002/FPR…	50
MF	GO:0008289	lipid binding	25/780	99/3372	0.343076	1	0.981401	FPRO_15682/FPRO_09700/FPRO_01427/FPRO_07721/FPRO_12785/FPRO_10574/FPRO_04330/FPRO_08408/FPRO_04107/FPRO_10381/FPRO_04796/FPRO_09152/FPRO_08124/FPRO_03045/FPRO_11888/FPRO_01758/FPRO_08437/FPRO_04746/FPRO_01891/FPRO_08452/FPRO_09416/FPRO_04527/FPRO_04778/FPRO_08273/FPRO_04731	25
MF	GO:0008237	metallopeptidase activity	9/780	33/3372	0.348001	1	0.981401	FPRO_01309/FPRO_08453/FPRO_01468/FPRO_08147/FPRO_05789/FPRO_09310/FPRO_04717/FPRO_00219/FPRO_01540	9
MF	GO:0008483	transaminase activity	7/780	25/3372	0.352725	1	0.981401	FPRO_00750/FPRO_16165/FPRO_04969/FPRO_10707/FPRO_03141/FPRO_10929/FPRO_00349	7
MF	GO:0016627	oxidoreductase activity, acting on the CH-CH group of donors	7/780	25/3372	0.352725	1	0.981401	FPRO_05179/FPRO_07968/FPRO_03469/FPRO_00662/FPRO_15170/FPRO_02677/FPRO_10922	7
MF	GO:0016769	transferase activity, transferring nitrogenous groups	7/780	25/3372	0.352725	1	0.981401	FPRO_00750/FPRO_16165/FPRO_04969/FPRO_10707/FPRO_03141/FPRO_10929/FPRO_00349	7
MF	GO:0032266	phosphatidylinositol-3-phosphate binding	7/780	25/3372	0.352725	1	0.981401	FPRO_07721/FPRO_08124/FPRO_03045/FPRO_01758/FPRO_09416/FPRO_04527/FPRO_08273	7
MF	GO:0017056	structural constituent of nuclear pore	4/780	13/3372	0.353186	1	0.981401	FPRO_06309/FPRO_09503/FPRO_04796/FPRO_08074	4
MF	GO:0015035	protein-disulfide reductase activity	5/780	17/3372	0.354782	1	0.981401	FPRO_06339/FPRO_02526/FPRO_03667/FPRO_12794/FPRO_03511	5
MF	GO:0016814	hydrolase activity, acting on carbon-nitrogen (but not peptide) bonds, in cyclic amidines	5/780	17/3372	0.354782	1	0.981401	FPRO_01466/FPRO_07787/FPRO_00990/FPRO_07742/FPRO_11031	5
MF	GO:0008233	peptidase activity	27/780	109/3372	0.376564	1	0.981401	FPRO_11227/FPRO_14591/FPRO_06374/FPRO_04841/FPRO_13426/FPRO_01309/FPRO_08453/FPRO_04130/FPRO_05980/FPRO_14280/FPRO_01468/FPRO_08147/FPRO_05789/FPRO_06050/FPRO_09503/FPRO_09394/FPRO_01733/FPRO_09310/FPRO_01265/FPRO_04717/FPRO_04840/FPRO_11988/FPRO_06385/FPRO_00219/FPRO_01540/FPRO_09436/FPRO_05266	27
MF	GO:0016301	kinase activity	44/780	181/3372	0.37875	1	0.981401	FPRO_10527/FPRO_05777/FPRO_09700/FPRO_13436/FPRO_06021/FPRO_12202/FPRO_07727/FPRO_09357/FPRO_05984/FPRO_04161/FPRO_10022/FPRO_13354/FPRO_00611/FPRO_05863/FPRO_07982/FPRO_02456/FPRO_03195/FPRO_02559/FPRO_09619/FPRO_08143/FPRO_10903/FPRO_05844/FPRO_03390/FPRO_09769/FPRO_04442/FPRO_05887/FPRO_08387/FPRO_06109/FPRO_10705/FPRO_05294/FPRO_13355/FPRO_04154/FPRO_01758/FPRO_09628/FPRO_02968/FPRO_08105/FPR…	44
MF	GO:0042277	peptide binding	9/780	34/3372	0.384815	1	0.981401	FPRO_10708/FPRO_01372/FPRO_04967/FPRO_09503/FPRO_10362/FPRO_09310/FPRO_11930/FPRO_10995/FPRO_05178	9
MF	GO:0016810	hydrolase activity, acting on carbon-nitrogen (but not peptide) bonds	15/780	59/3372	0.385804	1	0.981401	FPRO_13393/FPRO_01466/FPRO_07787/FPRO_03071/FPRO_10610/FPRO_00990/FPRO_07742/FPRO_05603/FPRO_11774/FPRO_14968/FPRO_02992/FPRO_11031/FPRO_01165/FPRO_13298/FPRO_07803	15
MF	GO:0003688	DNA replication origin binding	8/780	30/3372	0.389914	1	0.981401	FPRO_06020/FPRO_10953/FPRO_02586/FPRO_02298/FPRO_00736/FPRO_13052/FPRO_03133/FPRO_09694	8
MF	GO:0005319	lipid transporter activity	7/780	26/3372	0.395225	1	0.981401	FPRO_05805/FPRO_15682/FPRO_07694/FPRO_04702/FPRO_12785/FPRO_06394/FPRO_03353	7
MF	GO:0043169	cation binding	51/780	212/3372	0.398172	1	0.981401	FPRO_14009/FPRO_03657/FPRO_05777/FPRO_02842/FPRO_00079/FPRO_08475/FPRO_08120/FPRO_11021/FPRO_08494/FPRO_05865/FPRO_13463/FPRO_01466/FPRO_09879/FPRO_06856/FPRO_08673/FPRO_10599/FPRO_11055/FPRO_09440/FPRO_01309/FPRO_07902/FPRO_01140/FPRO_10529/FPRO_04439/FPRO_08211/FPRO_08062/FPRO_13357/FPRO_01468/FPRO_01020/FPRO_09619/FPRO_01132/FPRO_09456/FPRO_04842/FPRO_13115/FPRO_01068/FPRO_06123/FPRO_09310/FPR…	51
MF	GO:0004222	metalloendopeptidase activity	5/780	18/3372	0.406471	1	0.981401	FPRO_08453/FPRO_01468/FPRO_05789/FPRO_04717/FPRO_01540	5
MF	GO:0005548	phospholipid transporter activity	5/780	18/3372	0.406471	1	0.981401	FPRO_05805/FPRO_15682/FPRO_07694/FPRO_12785/FPRO_06394	5
MF	GO:0031491	nucleosome binding	4/780	14/3372	0.412276	1	0.981401	FPRO_04924/FPRO_13085/FPRO_08135/FPRO_05263	4
MF	GO:0034212	peptide N-acetyltransferase activity	4/780	14/3372	0.412276	1	0.981401	FPRO_04981/FPRO_03466/FPRO_13123/FPRO_06324	4
MF	GO:0051082	unfolded protein binding	15/780	60/3372	0.413936	1	0.981401	FPRO_02526/FPRO_11015/FPRO_14612/FPRO_01372/FPRO_10778/FPRO_01132/FPRO_03182/FPRO_05836/FPRO_02759/FPRO_08257/FPRO_09884/FPRO_09205/FPRO_10649/FPRO_09416/FPRO_01628	15
MF	GO:0033218	amide binding	10/780	39/3372	0.414857	1	0.981401	FPRO_10708/FPRO_01372/FPRO_04967/FPRO_09503/FPRO_10362/FPRO_09310/FPRO_11930/FPRO_00518/FPRO_10995/FPRO_05178	10
MF	GO:0004402	histone acetyltransferase activity	3/780	10/3372	0.417778	1	0.981401	FPRO_04981/FPRO_03466/FPRO_13123	3
MF	GO:0005355	glucose transmembrane transporter activity	3/780	10/3372	0.417778	1	0.981401	FPRO_15412/FPRO_04054/FPRO_13829	3
MF	GO:0015140	malate transmembrane transporter activity	3/780	10/3372	0.417778	1	0.981401	FPRO_06607/FPRO_09347/FPRO_07716	3
MF	GO:0015145	monosaccharide transmembrane transporter activity	3/780	10/3372	0.417778	1	0.981401	FPRO_15412/FPRO_04054/FPRO_13829	3
MF	GO:0015149	hexose transmembrane transporter activity	3/780	10/3372	0.417778	1	0.981401	FPRO_15412/FPRO_04054/FPRO_13829	3
MF	GO:0016837	carbon-oxygen lyase activity, acting on polysaccharides	3/780	10/3372	0.417778	1	0.981401	FPRO_06014/FPRO_00294/FPRO_14224	3
MF	GO:0016878	acid-thiol ligase activity	3/780	10/3372	0.417778	1	0.981401	FPRO_00079/FPRO_00503/FPRO_09437	3
MF	GO:0019904	protein domain specific binding	3/780	10/3372	0.417778	1	0.981401	FPRO_00498/FPRO_08143/FPRO_06152	3
MF	GO:0022836	gated channel activity	3/780	10/3372	0.417778	1	0.981401	FPRO_05865/FPRO_04259/FPRO_01365	3
MF	GO:0030983	mismatched DNA binding	3/780	10/3372	0.417778	1	0.981401	FPRO_10385/FPRO_11903/FPRO_04812	3
MF	GO:0043495	protein-membrane adaptor activity	3/780	10/3372	0.417778	1	0.981401	FPRO_06156/FPRO_06309/FPRO_10408	3
MF	GO:0051119	sugar transmembrane transporter activity	3/780	10/3372	0.417778	1	0.981401	FPRO_15412/FPRO_04054/FPRO_13829	3
MF	GO:0061733	peptide-lysine-N-acetyltransferase activity	3/780	10/3372	0.417778	1	0.981401	FPRO_04981/FPRO_03466/FPRO_13123	3
MF	GO:0005543	phospholipid binding	19/780	78/3372	0.441535	1	0.981401	FPRO_09700/FPRO_07721/FPRO_10574/FPRO_04330/FPRO_08408/FPRO_10381/FPRO_04796/FPRO_08124/FPRO_03045/FPRO_11888/FPRO_01758/FPRO_08437/FPRO_04746/FPRO_01891/FPRO_09416/FPRO_04527/FPRO_04778/FPRO_08273/FPRO_04731	19
MF	GO:0015297	antiporter activity	6/780	23/3372	0.446981	1	0.981401	FPRO_07088/FPRO_06531/FPRO_04144/FPRO_09015/FPRO_09347/FPRO_11603	6
MF	GO:0000977	RNA polymerase II transcription regulatory region sequence-specific DNA binding	18/780	74/3372	0.448178	1	0.981401	FPRO_03657/FPRO_07194/FPRO_08120/FPRO_06253/FPRO_01020/FPRO_00460/FPRO_08564/FPRO_00412/FPRO_04683/FPRO_04545/FPRO_08504/FPRO_15194/FPRO_04354/FPRO_15764/FPRO_03912/FPRO_04257/FPRO_09694/FPRO_00568	18
MF	GO:0004175	endopeptidase activity	14/780	57/3372	0.449471	1	0.981401	FPRO_14591/FPRO_08453/FPRO_04130/FPRO_14280/FPRO_01468/FPRO_05789/FPRO_09394/FPRO_01733/FPRO_01265/FPRO_04717/FPRO_04840/FPRO_11988/FPRO_01540/FPRO_09436	14
MF	GO:0016651	oxidoreductase activity, acting on NAD(P)H	10/780	40/3372	0.449786	1	0.981401	FPRO_00523/FPRO_11833/FPRO_01395/FPRO_03336/FPRO_04908/FPRO_09411/FPRO_06176/FPRO_06387/FPRO_13262/FPRO_03317	10
MF	GO:0016788	hydrolase activity, acting on ester bonds	52/780	220/3372	0.454753	1	0.981401	FPRO_01104/FPRO_02525/FPRO_05837/FPRO_15017/FPRO_10827/FPRO_02532/FPRO_10385/FPRO_05941/FPRO_10650/FPRO_06100/FPRO_05122/FPRO_06496/FPRO_10814/FPRO_02362/FPRO_13081/FPRO_00693/FPRO_02456/FPRO_13241/FPRO_10509/FPRO_11949/FPRO_03937/FPRO_04173/FPRO_05823/FPRO_03361/FPRO_03022/FPRO_02640/FPRO_13941/FPRO_09456/FPRO_01387/FPRO_09441/FPRO_04842/FPRO_13399/FPRO_08124/FPRO_12048/FPRO_10984/FPRO_04279/FPR…	52
MF	GO:0015399	primary active transmembrane transporter activity	16/780	66/3372	0.462522	1	0.981401	FPRO_15682/FPRO_08673/FPRO_03676/FPRO_05939/FPRO_13135/FPRO_00388/FPRO_12785/FPRO_04343/FPRO_10387/FPRO_03336/FPRO_09411/FPRO_00802/FPRO_04613/FPRO_13262/FPRO_04158/FPRO_15073	16
MF	GO:1990837	sequence-specific double-stranded DNA binding	29/780	122/3372	0.468424	1	0.981401	FPRO_03657/FPRO_07194/FPRO_08120/FPRO_13358/FPRO_06253/FPRO_04924/FPRO_06020/FPRO_01020/FPRO_00460/FPRO_10953/FPRO_08564/FPRO_00412/FPRO_04683/FPRO_04545/FPRO_02586/FPRO_11870/FPRO_02298/FPRO_00736/FPRO_08504/FPRO_15194/FPRO_13431/FPRO_04354/FPRO_15764/FPRO_13052/FPRO_03912/FPRO_04257/FPRO_03133/FPRO_09694/FPRO_00568	29
MF	GO:0008028	monocarboxylic acid transmembrane transporter activity	4/780	15/3372	0.470101	1	0.981401	FPRO_15412/FPRO_04054/FPRO_07710/FPRO_04588	4
MF	GO:0016776	phosphotransferase activity, phosphate group as acceptor	4/780	15/3372	0.470101	1	0.981401	FPRO_05863/FPRO_02456/FPRO_05844/FPRO_06109	4
MF	GO:0046873	metal ion transmembrane transporter activity	14/780	58/3372	0.478605	1	0.981401	FPRO_05865/FPRO_08673/FPRO_03676/FPRO_11605/FPRO_10745/FPRO_13135/FPRO_09015/FPRO_04259/FPRO_10387/FPRO_04955/FPRO_07847/FPRO_04218/FPRO_01365/FPRO_03585	14
MF	GO:0019829	ATPase-coupled cation transmembrane transporter activity	7/780	28/3372	0.479713	1	0.981401	FPRO_08673/FPRO_03676/FPRO_05939/FPRO_13135/FPRO_10387/FPRO_00802/FPRO_04613	7
MF	GO:0004177	aminopeptidase activity	3/780	11/3372	0.485782	1	0.981401	FPRO_11227/FPRO_09310/FPRO_05266	3
MF	GO:0005351	carbohydrate:proton symporter activity	3/780	11/3372	0.485782	1	0.981401	FPRO_15412/FPRO_04054/FPRO_13829	3
MF	GO:0005402	carbohydrate:cation symporter activity	3/780	11/3372	0.485782	1	0.981401	FPRO_15412/FPRO_04054/FPRO_13829	3
MF	GO:0016799	hydrolase activity, hydrolyzing N-glycosyl compounds	3/780	11/3372	0.485782	1	0.981401	FPRO_01460/FPRO_01423/FPRO_00921	3
MF	GO:0018455	alcohol dehydrogenase [NAD(P)+] activity	3/780	11/3372	0.485782	1	0.981401	FPRO_05186/FPRO_11056/FPRO_00437	3
MF	GO:0050661	NADP binding	3/780	11/3372	0.485782	1	0.981401	FPRO_00664/FPRO_14272/FPRO_05179	3
MF	GO:0000976	transcription cis-regulatory region binding	19/780	80/3372	0.491365	1	0.981401	FPRO_03657/FPRO_07194/FPRO_08120/FPRO_06253/FPRO_01020/FPRO_00460/FPRO_08564/FPRO_00412/FPRO_04683/FPRO_04545/FPRO_08504/FPRO_15194/FPRO_13431/FPRO_04354/FPRO_15764/FPRO_03912/FPRO_04257/FPRO_09694/FPRO_00568	19
MF	GO:0005506	iron ion binding	6/780	24/3372	0.4924	1	0.981401	FPRO_02842/FPRO_08475/FPRO_08494/FPRO_09879/FPRO_10529/FPRO_10572	6
MF	GO:0061659	ubiquitin-like protein ligase activity	18/780	76/3372	0.499311	1	0.981401	FPRO_09440/FPRO_09539/FPRO_04808/FPRO_01529/FPRO_04439/FPRO_08148/FPRO_09816/FPRO_03063/FPRO_03342/FPRO_03542/FPRO_05002/FPRO_08263/FPRO_00376/FPRO_03334/FPRO_00755/FPRO_10669/FPRO_09420/FPRO_04265	18
MF	GO:0015036	disulfide oxidoreductase activity	5/780	20/3372	0.507339	1	0.981401	FPRO_06339/FPRO_02526/FPRO_03667/FPRO_12794/FPRO_03511	5
MF	GO:0019205	nucleobase-containing compound kinase activity	5/780	20/3372	0.507339	1	0.981401	FPRO_10527/FPRO_05863/FPRO_05844/FPRO_08387/FPRO_06109	5
MF	GO:0043175	RNA polymerase core enzyme binding	5/780	20/3372	0.507339	1	0.981401	FPRO_00498/FPRO_01020/FPRO_12974/FPRO_13431/FPRO_05260	5
MF	GO:0070063	RNA polymerase binding	5/780	20/3372	0.507339	1	0.981401	FPRO_00498/FPRO_01020/FPRO_12974/FPRO_13431/FPRO_05260	5
MF	GO:0005516	calmodulin binding	4/780	16/3372	0.525675	1	0.981401	FPRO_09700/FPRO_11211/FPRO_09277/FPRO_04756	4
MF	GO:0000049	tRNA binding	6/780	25/3372	0.536507	1	0.981401	FPRO_09741/FPRO_01372/FPRO_07811/FPRO_01419/FPRO_11950/FPRO_01117	6
MF	GO:0003713	transcription coactivator activity	6/780	25/3372	0.536507	1	0.981401	FPRO_07827/FPRO_02531/FPRO_10574/FPRO_05085/FPRO_03427/FPRO_03129	6
MF	GO:0031625	ubiquitin protein ligase binding	6/780	25/3372	0.536507	1	0.981401	FPRO_14009/FPRO_09816/FPRO_15375/FPRO_00910/FPRO_06165/FPRO_09436	6
MF	GO:0044389	ubiquitin-like protein ligase binding	6/780	25/3372	0.536507	1	0.981401	FPRO_14009/FPRO_09816/FPRO_15375/FPRO_00910/FPRO_06165/FPRO_09436	6
MF	GO:0008519	ammonium transmembrane transporter activity	3/780	12/3372	0.549683	1	0.981401	FPRO_11655/FPRO_12998/FPRO_15689	3
MF	GO:0015144	carbohydrate transmembrane transporter activity	3/780	12/3372	0.549683	1	0.981401	FPRO_15412/FPRO_04054/FPRO_13829	3
MF	GO:0016628	oxidoreductase activity, acting on the CH-CH group of donors, NAD or NADP as acceptor	3/780	12/3372	0.549683	1	0.981401	FPRO_05179/FPRO_07968/FPRO_03469	3
MF	GO:0034062	5'-3' RNA polymerase activity	3/780	12/3372	0.549683	1	0.981401	FPRO_11862/FPRO_09716/FPRO_03133	3
MF	GO:0042054	histone methyltransferase activity	3/780	12/3372	0.549683	1	0.981401	FPRO_10941/FPRO_03063/FPRO_05263	3
MF	GO:0097747	RNA polymerase activity	3/780	12/3372	0.549683	1	0.981401	FPRO_11862/FPRO_09716/FPRO_03133	3
MF	GO:0003677	DNA binding	76/780	331/3372	0.55431	1	0.981401	FPRO_03657/FPRO_01666/FPRO_07194/FPRO_08120/FPRO_02525/FPRO_00501/FPRO_05045/FPRO_05837/FPRO_13358/FPRO_09159/FPRO_04890/FPRO_10385/FPRO_04827/FPRO_07787/FPRO_06253/FPRO_10587/FPRO_01411/FPRO_02809/FPRO_04924/FPRO_04808/FPRO_06020/FPRO_02251/FPRO_10991/FPRO_11070/FPRO_10574/FPRO_01444/FPRO_11799/FPRO_11059/FPRO_01020/FPRO_00460/FPRO_10953/FPRO_08564/FPRO_00412/FPRO_07903/FPRO_04683/FPRO_03158/FPR…	76
MF	GO:0008238	exopeptidase activity	5/780	21/3372	0.555166	1	0.981401	FPRO_11227/FPRO_08147/FPRO_06050/FPRO_09310/FPRO_05266	5
MF	GO:0004721	phosphoprotein phosphatase activity	7/780	30/3372	0.560651	1	0.981401	FPRO_06100/FPRO_03022/FPRO_02640/FPRO_01387/FPRO_12048/FPRO_04279/FPRO_00387	7
MF	GO:0042625	ATPase-coupled ion transmembrane transporter activity	7/780	30/3372	0.560651	1	0.981401	FPRO_08673/FPRO_03676/FPRO_05939/FPRO_13135/FPRO_10387/FPRO_00802/FPRO_04613	7
MF	GO:0000993	RNA polymerase II complex binding	4/780	17/3372	0.578257	1	0.981401	FPRO_00498/FPRO_01020/FPRO_12974/FPRO_05260	4
MF	GO:0004659	prenyltransferase activity	4/780	17/3372	0.578257	1	0.981401	FPRO_15512/FPRO_07922/FPRO_03278/FPRO_04857	4
MF	GO:0015662	P-type ion transporter activity	4/780	17/3372	0.578257	1	0.981401	FPRO_08673/FPRO_03676/FPRO_13135/FPRO_10387	4
MF	GO:0016859	cis-trans isomerase activity	4/780	17/3372	0.578257	1	0.981401	FPRO_08943/FPRO_05260/FPRO_00518/FPRO_01698	4
MF	GO:0140358	P-type transmembrane transporter activity	4/780	17/3372	0.578257	1	0.981401	FPRO_08673/FPRO_03676/FPRO_13135/FPRO_10387	4
MF	GO:1901505	carbohydrate derivative transmembrane transporter activity	4/780	17/3372	0.578257	1	0.981401	FPRO_08456/FPRO_04155/FPRO_09283/FPRO_04642	4
MF	GO:0000030	mannosyltransferase activity	6/780	26/3372	0.578892	1	0.981401	FPRO_04742/FPRO_15254/FPRO_11293/FPRO_00259/FPRO_10708/FPRO_03006	6
MF	GO:0008234	cysteine-type peptidase activity	8/780	35/3372	0.581356	1	0.981401	FPRO_06374/FPRO_08453/FPRO_04130/FPRO_05980/FPRO_04840/FPRO_11988/FPRO_06385/FPRO_09436	8
MF	GO:0046983	protein dimerization activity	8/780	35/3372	0.581356	1	0.981401	FPRO_00664/FPRO_10545/FPRO_08109/FPRO_07902/FPRO_11205/FPRO_09599/FPRO_10922/FPRO_10651	8
MF	GO:0016835	carbon-oxygen lyase activity	10/780	44/3372	0.584451	1	0.981401	FPRO_06014/FPRO_00592/FPRO_11862/FPRO_12807/FPRO_11699/FPRO_08062/FPRO_04926/FPRO_00294/FPRO_14224/FPRO_00890	10
MF	GO:0016798	hydrolase activity, acting on glycosyl bonds	16/780	71/3372	0.594566	1	0.981401	FPRO_06401/FPRO_00841/FPRO_01460/FPRO_02984/FPRO_14055/FPRO_01043/FPRO_09930/FPRO_01423/FPRO_10473/FPRO_05864/FPRO_06269/FPRO_02462/FPRO_12250/FPRO_03686/FPRO_00921/FPRO_06637	16
MF	GO:0008276	protein methyltransferase activity	7/780	31/3372	0.598931	1	0.981401	FPRO_08119/FPRO_06386/FPRO_09202/FPRO_10941/FPRO_03063/FPRO_10830/FPRO_05263	7
MF	GO:0051536	iron-sulfur cluster binding	5/780	22/3372	0.600581	1	0.981401	FPRO_02456/FPRO_12794/FPRO_07874/FPRO_06261/FPRO_00348	5
MF	GO:0051540	metal cluster binding	5/780	22/3372	0.600581	1	0.981401	FPRO_02456/FPRO_12794/FPRO_07874/FPRO_06261/FPRO_00348	5
MF	GO:0016829	lyase activity	22/780	98/3372	0.604454	1	0.981401	FPRO_06014/FPRO_00592/FPRO_11862/FPRO_12807/FPRO_12793/FPRO_08361/FPRO_07902/FPRO_09542/FPRO_01751/FPRO_06340/FPRO_08360/FPRO_08211/FPRO_11699/FPRO_08062/FPRO_11832/FPRO_00772/FPRO_04926/FPRO_00294/FPRO_14224/FPRO_00890/FPRO_02935/FPRO_05788	22
MF	GO:0003700	DNA-binding transcription factor activity	24/780	107/3372	0.607624	1	0.981401	FPRO_03657/FPRO_07194/FPRO_08120/FPRO_05045/FPRO_06253/FPRO_09595/FPRO_10574/FPRO_01444/FPRO_00460/FPRO_08564/FPRO_04683/FPRO_08135/FPRO_04545/FPRO_13282/FPRO_08504/FPRO_03129/FPRO_15194/FPRO_04354/FPRO_04438/FPRO_15764/FPRO_03912/FPRO_04257/FPRO_09694/FPRO_00568	24
MF	GO:0003714	transcription corepressor activity	3/780	13/3372	0.608632	1	0.981401	FPRO_01266/FPRO_10381/FPRO_03427	3
MF	GO:0016773	phosphotransferase activity, alcohol group as acceptor	35/780	156/3372	0.61549	1	0.981401	FPRO_10527/FPRO_05777/FPRO_04151/FPRO_09700/FPRO_06021/FPRO_12202/FPRO_07727/FPRO_04161/FPRO_10022/FPRO_13354/FPRO_00611/FPRO_07982/FPRO_03195/FPRO_02559/FPRO_09619/FPRO_08143/FPRO_10903/FPRO_09769/FPRO_04442/FPRO_05887/FPRO_10705/FPRO_05294/FPRO_13355/FPRO_04154/FPRO_01758/FPRO_09628/FPRO_02968/FPRO_10572/FPRO_04971/FPRO_11681/FPRO_04756/FPRO_04731/FPRO_13312/FPRO_09466/FPRO_14471	35
MF	GO:0042393	histone binding	8/780	36/3372	0.616388	1	0.981401	FPRO_04981/FPRO_04924/FPRO_03063/FPRO_12047/FPRO_08135/FPRO_05002/FPRO_07989/FPRO_02883	8
MF	GO:0001217	DNA-binding transcription repressor activity	4/780	18/3372	0.627339	1	0.981401	FPRO_05045/FPRO_04545/FPRO_09694/FPRO_00568	4
MF	GO:0001227	DNA-binding transcription repressor activity, RNA polymerase II-specific	4/780	18/3372	0.627339	1	0.981401	FPRO_05045/FPRO_04545/FPRO_09694/FPRO_00568	4
MF	GO:0015103	inorganic anion transmembrane transporter activity	4/780	18/3372	0.627339	1	0.981401	FPRO_04267/FPRO_00955/FPRO_04826/FPRO_10849	4
MF	GO:0140359	ABC-type transporter activity	4/780	18/3372	0.627339	1	0.981401	FPRO_15682/FPRO_12785/FPRO_04158/FPRO_15073	4
MF	GO:0000981	DNA-binding transcription factor activity, RNA polymerase II-specific	19/780	86/3372	0.633506	1	0.981401	FPRO_03657/FPRO_07194/FPRO_08120/FPRO_05045/FPRO_06253/FPRO_00460/FPRO_08564/FPRO_04683/FPRO_04545/FPRO_13282/FPRO_08504/FPRO_03129/FPRO_15194/FPRO_04354/FPRO_15764/FPRO_03912/FPRO_04257/FPRO_09694/FPRO_00568	19
MF	GO:0016830	carbon-carbon lyase activity	7/780	32/3372	0.635415	1	0.981401	FPRO_12793/FPRO_09542/FPRO_06340/FPRO_08211/FPRO_11832/FPRO_02935/FPRO_05788	7
MF	GO:0035091	phosphatidylinositol binding	14/780	64/3372	0.643412	1	0.981401	FPRO_07721/FPRO_04330/FPRO_08408/FPRO_08124/FPRO_03045/FPRO_11888/FPRO_01758/FPRO_08437/FPRO_01891/FPRO_09416/FPRO_04527/FPRO_04778/FPRO_08273/FPRO_04731	14
MF	GO:0016765	transferase activity, transferring alkyl or aryl (other than methyl) groups	10/780	46/3372	0.645971	1	0.981401	FPRO_08499/FPRO_09307/FPRO_15512/FPRO_07922/FPRO_03278/FPRO_04857/FPRO_00821/FPRO_00772/FPRO_01204/FPRO_04971	10
MF	GO:0005096	GTPase activator activity	8/780	37/3372	0.649813	1	0.981401	FPRO_07794/FPRO_14081/FPRO_01294/FPRO_03153/FPRO_07945/FPRO_10709/FPRO_02759/FPRO_02712	8
MF	GO:0019787	ubiquitin-like protein transferase activity	19/780	87/3372	0.655346	1	0.981401	FPRO_09440/FPRO_09539/FPRO_04808/FPRO_01529/FPRO_04439/FPRO_08148/FPRO_09816/FPRO_03063/FPRO_03342/FPRO_03542/FPRO_05002/FPRO_08263/FPRO_00376/FPRO_13100/FPRO_03334/FPRO_00755/FPRO_10669/FPRO_09420/FPRO_04265	19
MF	GO:0140110	transcription regulator activity	40/780	181/3372	0.661682	1	0.981401	FPRO_03657/FPRO_07194/FPRO_08120/FPRO_05045/FPRO_07827/FPRO_02531/FPRO_06253/FPRO_09595/FPRO_04924/FPRO_04702/FPRO_13283/FPRO_10574/FPRO_01444/FPRO_01557/FPRO_01266/FPRO_11059/FPRO_01020/FPRO_00460/FPRO_04672/FPRO_10381/FPRO_08564/FPRO_05085/FPRO_04683/FPRO_03466/FPRO_08135/FPRO_04545/FPRO_13282/FPRO_03427/FPRO_07945/FPRO_08504/FPRO_03129/FPRO_15194/FPRO_13431/FPRO_04354/FPRO_04438/FPRO_15764/FPR…	40
MF	GO:0044877	protein-containing complex binding	28/780	128/3372	0.668621	1	0.981401	FPRO_13216/FPRO_00498/FPRO_13463/FPRO_00592/FPRO_09741/FPRO_06253/FPRO_04924/FPRO_08085/FPRO_14612/FPRO_14280/FPRO_01020/FPRO_02933/FPRO_13085/FPRO_08135/FPRO_01733/FPRO_12974/FPRO_08112/FPRO_07951/FPRO_02883/FPRO_04612/FPRO_05260/FPRO_00219/FPRO_05221/FPRO_03133/FPRO_00797/FPRO_01559/FPRO_05263/FPRO_01006	28
MF	GO:0001098	basal transcription machinery binding	4/780	19/3372	0.672611	1	0.981401	FPRO_00498/FPRO_01020/FPRO_12974/FPRO_05260	4
MF	GO:0001099	basal RNA polymerase II transcription machinery binding	4/780	19/3372	0.672611	1	0.981401	FPRO_00498/FPRO_01020/FPRO_12974/FPRO_05260	4
MF	GO:0004843	cysteine-type deubiquitinase activity	4/780	19/3372	0.672611	1	0.981401	FPRO_06374/FPRO_05980/FPRO_06385/FPRO_09436	4
MF	GO:0016877	ligase activity, forming carbon-sulfur bonds	4/780	19/3372	0.672611	1	0.981401	FPRO_00079/FPRO_00503/FPRO_02390/FPRO_09437	4
MF	GO:0032182	ubiquitin-like protein binding	10/780	47/3372	0.674771	1	0.981401	FPRO_09440/FPRO_06123/FPRO_07945/FPRO_02968/FPRO_07724/FPRO_02513/FPRO_03352/FPRO_06165/FPRO_05728/FPRO_01006	10
MF	GO:0001067	transcription regulatory region nucleic acid binding	23/780	106/3372	0.676132	1	0.981401	FPRO_03657/FPRO_07194/FPRO_08120/FPRO_00498/FPRO_01304/FPRO_06253/FPRO_01444/FPRO_01020/FPRO_00460/FPRO_08564/FPRO_00412/FPRO_04683/FPRO_03158/FPRO_04545/FPRO_08504/FPRO_15194/FPRO_13431/FPRO_04354/FPRO_15764/FPRO_03912/FPRO_04257/FPRO_09694/FPRO_00568	23
MF	GO:0004812	aminoacyl-tRNA ligase activity	8/780	38/3372	0.681494	1	0.981401	FPRO_05585/FPRO_07881/FPRO_03697/FPRO_11960/FPRO_01419/FPRO_05780/FPRO_10828/FPRO_08519	8
MF	GO:0016875	ligase activity, forming carbon-oxygen bonds	8/780	38/3372	0.681494	1	0.981401	FPRO_05585/FPRO_07881/FPRO_03697/FPRO_11960/FPRO_01419/FPRO_05780/FPRO_10828/FPRO_08519	8
MF	GO:0050660	flavin adenine dinucleotide binding	5/780	24/3372	0.682945	1	0.981401	FPRO_09879/FPRO_06339/FPRO_15504/FPRO_11834/FPRO_00348	5
MF	GO:0003712	transcription coregulator activity	9/780	43/3372	0.692185	1	0.981401	FPRO_07827/FPRO_02531/FPRO_04702/FPRO_10574/FPRO_01266/FPRO_10381/FPRO_05085/FPRO_03427/FPRO_03129	9
MF	GO:0016667	oxidoreductase activity, acting on a sulfur group of donors	6/780	29/3372	0.692879	1	0.981401	FPRO_06339/FPRO_02526/FPRO_08393/FPRO_03667/FPRO_12794/FPRO_03511	6
MF	GO:0005496	steroid binding	3/780	15/3372	0.710204	1	0.981401	FPRO_15682/FPRO_12785/FPRO_04778	3
MF	GO:0016638	oxidoreductase activity, acting on the CH-NH2 group of donors	3/780	15/3372	0.710204	1	0.981401	FPRO_04421/FPRO_00487/FPRO_02993	3
MF	GO:0044769	ATPase activity, coupled to transmembrane movement of ions, rotational mechanism	3/780	15/3372	0.710204	1	0.981401	FPRO_05939/FPRO_00802/FPRO_04613	3
MF	GO:0003746	translation elongation factor activity	2/780	10/3372	0.711647	1	0.981401	FPRO_03074/FPRO_09277	2
MF	GO:0008235	metalloexopeptidase activity	2/780	10/3372	0.711647	1	0.981401	FPRO_08147/FPRO_09310	2
MF	GO:0008409	5'-3' exonuclease activity	2/780	10/3372	0.711647	1	0.981401	FPRO_04842/FPRO_10984	2
MF	GO:0015298	solute:cation antiporter activity	2/780	10/3372	0.711647	1	0.981401	FPRO_06531/FPRO_09015	2
MF	GO:0016409	palmitoyltransferase activity	2/780	10/3372	0.711647	1	0.981401	FPRO_13293/FPRO_06400	2
MF	GO:0016413	O-acetyltransferase activity	2/780	10/3372	0.711647	1	0.981401	FPRO_00084/FPRO_02082	2
MF	GO:0016671	oxidoreductase activity, acting on a sulfur group of donors, disulfide as acceptor	2/780	10/3372	0.711647	1	0.981401	FPRO_02526/FPRO_03511	2
MF	GO:0020037	heme binding	2/780	10/3372	0.711647	1	0.981401	FPRO_05233/FPRO_15419	2
MF	GO:0036002	pre-mRNA binding	2/780	10/3372	0.711647	1	0.981401	FPRO_08148/FPRO_11674	2
MF	GO:0046906	tetrapyrrole binding	2/780	10/3372	0.711647	1	0.981401	FPRO_05233/FPRO_15419	2
MF	GO:0090599	alpha-glucosidase activity	2/780	10/3372	0.711647	1	0.981401	FPRO_05864/FPRO_06637	2
MF	GO:1901618	organic hydroxy compound transmembrane transporter activity	2/780	10/3372	0.711647	1	0.981401	FPRO_15682/FPRO_12785	2
MF	GO:0004842	ubiquitin-protein transferase activity	14/780	67/3372	0.714769	1	0.981401	FPRO_09440/FPRO_04808/FPRO_01529/FPRO_04439/FPRO_09816/FPRO_03342/FPRO_08263/FPRO_00376/FPRO_13100/FPRO_03334/FPRO_00755/FPRO_10669/FPRO_09420/FPRO_04265	14
MF	GO:0031267	small GTPase binding	12/780	58/3372	0.720269	1	0.981401	FPRO_07794/FPRO_01294/FPRO_09955/FPRO_07487/FPRO_05969/FPRO_13383/FPRO_08523/FPRO_11888/FPRO_01510/FPRO_11091/FPRO_07915/FPRO_11923	12
MF	GO:0042626	ATPase-coupled transmembrane transporter activity	12/780	58/3372	0.720269	1	0.981401	FPRO_15682/FPRO_08673/FPRO_03676/FPRO_05939/FPRO_13135/FPRO_00388/FPRO_12785/FPRO_10387/FPRO_00802/FPRO_04613/FPRO_04158/FPRO_15073	12
MF	GO:0045182	translation regulator activity	12/780	58/3372	0.720269	1	0.981401	FPRO_03074/FPRO_14084/FPRO_11059/FPRO_10598/FPRO_05990/FPRO_08569/FPRO_06307/FPRO_00595/FPRO_07718/FPRO_09277/FPRO_04574/FPRO_04358	12
MF	GO:0005509	calcium ion binding	7/780	35/3372	0.73259	1	0.981401	FPRO_14009/FPRO_05865/FPRO_08673/FPRO_10599/FPRO_01132/FPRO_09456/FPRO_06123	7
MF	GO:0090079	translation regulator activity, nucleic acid binding	11/780	54/3372	0.735789	1	0.981401	FPRO_03074/FPRO_14084/FPRO_11059/FPRO_10598/FPRO_05990/FPRO_06307/FPRO_00595/FPRO_07718/FPRO_09277/FPRO_04574/FPRO_04358	11
MF	GO:0043565	sequence-specific DNA binding	37/780	173/3372	0.739688	1	0.981401	FPRO_03657/FPRO_07194/FPRO_08120/FPRO_05045/FPRO_13358/FPRO_06253/FPRO_04924/FPRO_06020/FPRO_10574/FPRO_01444/FPRO_01020/FPRO_00460/FPRO_10953/FPRO_08564/FPRO_00412/FPRO_04683/FPRO_03466/FPRO_04545/FPRO_13282/FPRO_02586/FPRO_11870/FPRO_02298/FPRO_00736/FPRO_08504/FPRO_15194/FPRO_13431/FPRO_03334/FPRO_04354/FPRO_15764/FPRO_13052/FPRO_03912/FPRO_04257/FPRO_04767/FPRO_03133/FPRO_01117/FPRO_09694/FPR…	37
MF	GO:0036094	small molecule binding	82/780	374/3372	0.741044	1	0.981401	FPRO_02384/FPRO_00523/FPRO_00664/FPRO_05777/FPRO_00079/FPRO_15682/FPRO_04430/FPRO_05837/FPRO_09700/FPRO_14272/FPRO_09879/FPRO_06339/FPRO_08673/FPRO_07787/FPRO_13436/FPRO_12202/FPRO_05179/FPRO_02809/FPRO_12793/FPRO_04924/FPRO_13354/FPRO_01417/FPRO_07902/FPRO_11015/FPRO_02251/FPRO_07982/FPRO_02456/FPRO_12785/FPRO_03195/FPRO_15345/FPRO_13332/FPRO_02559/FPRO_00732/FPRO_08118/FPRO_01372/FPRO_03074/FPR…	82
MF	GO:0003682	chromatin binding	20/780	96/3372	0.742975	1	0.981401	FPRO_05837/FPRO_04981/FPRO_04924/FPRO_06020/FPRO_11070/FPRO_10574/FPRO_11164/FPRO_01114/FPRO_01020/FPRO_00460/FPRO_13084/FPRO_04842/FPRO_12047/FPRO_13085/FPRO_03466/FPRO_08135/FPRO_00740/FPRO_06193/FPRO_08247/FPRO_05263	20
MF	GO:0004553	hydrolase activity, hydrolyzing O-glycosyl compounds	12/780	59/3372	0.743202	1	0.981401	FPRO_06401/FPRO_00841/FPRO_14055/FPRO_01043/FPRO_09930/FPRO_10473/FPRO_05864/FPRO_06269/FPRO_02462/FPRO_12250/FPRO_03686/FPRO_06637	12
MF	GO:0043130	ubiquitin binding	9/780	45/3372	0.745903	1	0.981401	FPRO_06123/FPRO_07945/FPRO_02968/FPRO_07724/FPRO_02513/FPRO_03352/FPRO_06165/FPRO_05728/FPRO_01006	9
MF	GO:1902936	phosphatidylinositol bisphosphate binding	4/780	21/3372	0.751284	1	0.981401	FPRO_11888/FPRO_08437/FPRO_09416/FPRO_04778	4
MF	GO:0003755	peptidyl-prolyl cis-trans isomerase activity	3/780	16/3372	0.752788	1	0.981401	FPRO_05260/FPRO_00518/FPRO_01698	3
MF	GO:0004520	endodeoxyribonuclease activity	3/780	16/3372	0.752788	1	0.981401	FPRO_05837/FPRO_10385/FPRO_10984	3
MF	GO:0019783	ubiquitin-like protein peptidase activity	5/780	26/3372	0.753045	1	0.981401	FPRO_06374/FPRO_05980/FPRO_04840/FPRO_06385/FPRO_09436	5
MF	GO:0003774	cytoskeletal motor activity	2/780	11/3372	0.761839	1	0.981401	FPRO_02466/FPRO_09719	2
MF	GO:0003899	DNA-directed 5'-3' RNA polymerase activity	2/780	11/3372	0.761839	1	0.981401	FPRO_11862/FPRO_03133	2
MF	GO:0008559	ABC-type xenobiotic transporter activity	2/780	11/3372	0.761839	1	0.981401	FPRO_15682/FPRO_12785	2
MF	GO:0019239	deaminase activity	2/780	11/3372	0.761839	1	0.981401	FPRO_07742/FPRO_11031	2
MF	GO:0030246	carbohydrate binding	2/780	11/3372	0.761839	1	0.981401	FPRO_00664/FPRO_10534	2
MF	GO:0042910	xenobiotic transmembrane transporter activity	2/780	11/3372	0.761839	1	0.981401	FPRO_15682/FPRO_12785	2
MF	GO:0061630	ubiquitin protein ligase activity	12/780	60/3372	0.764856	1	0.981401	FPRO_09440/FPRO_01529/FPRO_04439/FPRO_09816/FPRO_03342/FPRO_08263/FPRO_00376/FPRO_03334/FPRO_00755/FPRO_10669/FPRO_09420/FPRO_04265	12
MF	GO:0043168	anion binding	92/780	422/3372	0.773733	1	0.981401	FPRO_00523/FPRO_05777/FPRO_00079/FPRO_15682/FPRO_04430/FPRO_05837/FPRO_09700/FPRO_09879/FPRO_06339/FPRO_08673/FPRO_07787/FPRO_13436/FPRO_12202/FPRO_07721/FPRO_02809/FPRO_04924/FPRO_13354/FPRO_01417/FPRO_07902/FPRO_11015/FPRO_02251/FPRO_10708/FPRO_07982/FPRO_02456/FPRO_12785/FPRO_03195/FPRO_15345/FPRO_13332/FPRO_10574/FPRO_02559/FPRO_00732/FPRO_08118/FPRO_04330/FPRO_01372/FPRO_03074/FPRO_11205/FPR…	92
MF	GO:1901981	phosphatidylinositol phosphate binding	10/780	51/3372	0.775211	1	0.981401	FPRO_07721/FPRO_08124/FPRO_03045/FPRO_11888/FPRO_01758/FPRO_08437/FPRO_09416/FPRO_04527/FPRO_04778/FPRO_08273	10
MF	GO:0016811	hydrolase activity, acting on carbon-nitrogen (but not peptide) bonds, in linear amides	6/780	32/3372	0.784342	1	0.981401	FPRO_13393/FPRO_10610/FPRO_11774/FPRO_14968/FPRO_01165/FPRO_13298	6
MF	GO:0016836	hydro-lyase activity	6/780	32/3372	0.784342	1	0.981401	FPRO_00592/FPRO_12807/FPRO_11699/FPRO_08062/FPRO_04926/FPRO_00890	6
MF	GO:0016831	carboxy-lyase activity	4/780	22/3372	0.784774	1	0.981401	FPRO_12793/FPRO_06340/FPRO_11832/FPRO_05788	4
MF	GO:0101005	deubiquitinase activity	4/780	22/3372	0.784774	1	0.981401	FPRO_06374/FPRO_05980/FPRO_06385/FPRO_09436	4
MF	GO:0140104	molecular carrier activity	4/780	22/3372	0.784774	1	0.981401	FPRO_11055/FPRO_02896/FPRO_04426/FPRO_01068	4
MF	GO:0140657	ATP-dependent activity	51/780	240/3372	0.785879	1	0.981401	FPRO_15682/FPRO_04430/FPRO_00503/FPRO_05837/FPRO_04890/FPRO_08673/FPRO_03676/FPRO_02809/FPRO_04924/FPRO_09440/FPRO_05939/FPRO_13135/FPRO_02251/FPRO_00388/FPRO_07982/FPRO_12785/FPRO_11164/FPRO_08118/FPRO_10387/FPRO_01372/FPRO_04173/FPRO_11205/FPRO_10778/FPRO_03182/FPRO_00802/FPRO_02586/FPRO_08263/FPRO_04771/FPRO_11870/FPRO_04613/FPRO_11903/FPRO_10729/FPRO_01311/FPRO_08212/FPRO_08112/FPRO_04812/FPR…	51
MF	GO:0008236	serine-type peptidase activity	3/780	17/3372	0.790188	1	0.981401	FPRO_14280/FPRO_01733/FPRO_09310	3
MF	GO:0004252	serine-type endopeptidase activity	2/780	12/3372	0.80427	1	0.981401	FPRO_14280/FPRO_01733	2
MF	GO:0051020	GTPase binding	16/780	81/3372	0.80441	1	0.981401	FPRO_07794/FPRO_01294/FPRO_09955/FPRO_07487/FPRO_05969/FPRO_08143/FPRO_10598/FPRO_13383/FPRO_05990/FPRO_08523/FPRO_11888/FPRO_01510/FPRO_06307/FPRO_11091/FPRO_07915/FPRO_11923	16
MF	GO:0016887	ATP hydrolysis activity	48/780	229/3372	0.812065	1	0.981401	FPRO_15682/FPRO_04430/FPRO_05837/FPRO_04890/FPRO_08673/FPRO_03676/FPRO_02809/FPRO_04924/FPRO_09440/FPRO_05939/FPRO_13135/FPRO_02251/FPRO_00388/FPRO_07982/FPRO_12785/FPRO_11164/FPRO_08118/FPRO_10387/FPRO_01372/FPRO_04173/FPRO_11205/FPRO_10778/FPRO_03182/FPRO_00802/FPRO_02586/FPRO_08263/FPRO_04771/FPRO_11870/FPRO_04613/FPRO_11903/FPRO_10729/FPRO_01311/FPRO_08212/FPRO_08112/FPRO_04812/FPRO_06358/FPR…	48
MF	GO:0017171	serine hydrolase activity	3/780	18/3372	0.822757	1	0.981401	FPRO_14280/FPRO_01733/FPRO_09310	3
MF	GO:0051015	actin filament binding	3/780	18/3372	0.822757	1	0.981401	FPRO_08085/FPRO_05221/FPRO_01006	3
MF	GO:0008135	translation factor activity, RNA binding	9/780	49/3372	0.833024	1	0.981401	FPRO_03074/FPRO_14084/FPRO_11059/FPRO_10598/FPRO_05990/FPRO_06307/FPRO_00595/FPRO_09277/FPRO_04358	9
MF	GO:0005507	copper ion binding	2/780	13/3372	0.839841	1	0.981401	FPRO_11055/FPRO_01068	2
MF	GO:0016782	transferase activity, transferring sulphur-containing groups	2/780	13/3372	0.839841	1	0.981401	FPRO_02390/FPRO_12794	2
MF	GO:0016790	thiolester hydrolase activity	2/780	13/3372	0.839841	1	0.981401	FPRO_04451/FPRO_04196	2
MF	GO:0016895	exodeoxyribonuclease activity, producing 5'-phosphomonoesters	2/780	13/3372	0.839841	1	0.981401	FPRO_10984/FPRO_05958	2
MF	GO:0044183	protein folding chaperone	2/780	13/3372	0.839841	1	0.981401	FPRO_02759/FPRO_09884	2
MF	GO:0070273	phosphatidylinositol-4-phosphate binding	2/780	13/3372	0.839841	1	0.981401	FPRO_09416/FPRO_04778	2
MF	GO:0004536	deoxyribonuclease activity	4/780	24/3372	0.840894	1	0.981401	FPRO_05837/FPRO_10385/FPRO_10984/FPRO_05958	4
MF	GO:0000166	nucleotide binding	72/780	341/3372	0.841259	1	0.981401	FPRO_02384/FPRO_00523/FPRO_00664/FPRO_05777/FPRO_00079/FPRO_15682/FPRO_04430/FPRO_05837/FPRO_09700/FPRO_14272/FPRO_09879/FPRO_06339/FPRO_08673/FPRO_07787/FPRO_13436/FPRO_12202/FPRO_05179/FPRO_02809/FPRO_12793/FPRO_04924/FPRO_13354/FPRO_07902/FPRO_11015/FPRO_02251/FPRO_07982/FPRO_02456/FPRO_12785/FPRO_03195/FPRO_13332/FPRO_02559/FPRO_00732/FPRO_08118/FPRO_01372/FPRO_03074/FPRO_11205/FPRO_04426/FPR…	72
MF	GO:1901265	nucleoside phosphate binding	72/780	341/3372	0.841259	1	0.981401	FPRO_02384/FPRO_00523/FPRO_00664/FPRO_05777/FPRO_00079/FPRO_15682/FPRO_04430/FPRO_05837/FPRO_09700/FPRO_14272/FPRO_09879/FPRO_06339/FPRO_08673/FPRO_07787/FPRO_13436/FPRO_12202/FPRO_05179/FPRO_02809/FPRO_12793/FPRO_04924/FPRO_13354/FPRO_07902/FPRO_11015/FPRO_02251/FPRO_07982/FPRO_02456/FPRO_12785/FPRO_03195/FPRO_13332/FPRO_02559/FPRO_00732/FPRO_08118/FPRO_01372/FPRO_03074/FPRO_11205/FPRO_04426/FPR…	72
MF	GO:0004527	exonuclease activity	7/780	40/3372	0.851468	1	0.981401	FPRO_00693/FPRO_09441/FPRO_04842/FPRO_10984/FPRO_10729/FPRO_05958/FPRO_10735	7
MF	GO:0008170	N-methyltransferase activity	7/780	40/3372	0.851468	1	0.981401	FPRO_08119/FPRO_06386/FPRO_09202/FPRO_10941/FPRO_03063/FPRO_10830/FPRO_05263	7
MF	GO:0003779	actin binding	5/780	30/3372	0.857381	1	0.981401	FPRO_08085/FPRO_06152/FPRO_04612/FPRO_05221/FPRO_01006	5
MF	GO:0003684	damaged DNA binding	4/780	25/3372	0.864006	1	0.981401	FPRO_11059/FPRO_00211/FPRO_04812/FPRO_07858	4
MF	GO:0019208	phosphatase regulator activity	4/780	25/3372	0.864006	1	0.981401	FPRO_10829/FPRO_06403/FPRO_05728/FPRO_03375	4
MF	GO:0046915	transition metal ion transmembrane transporter activity	4/780	25/3372	0.864006	1	0.981401	FPRO_11605/FPRO_10745/FPRO_04218/FPRO_03585	4
MF	GO:0004529	exodeoxyribonuclease activity	2/780	14/3372	0.86945	1	0.981401	FPRO_10984/FPRO_05958	2
MF	GO:0046961	proton-transporting ATPase activity, rotational mechanism	2/780	14/3372	0.86945	1	0.981401	FPRO_00802/FPRO_04613	2
MF	GO:0097367	carbohydrate derivative binding	63/780	305/3372	0.874946	1	0.981401	FPRO_00841/FPRO_00523/FPRO_05777/FPRO_00079/FPRO_15682/FPRO_04430/FPRO_05837/FPRO_09700/FPRO_08673/FPRO_07787/FPRO_13436/FPRO_12202/FPRO_14055/FPRO_02809/FPRO_04924/FPRO_13354/FPRO_07902/FPRO_11015/FPRO_02251/FPRO_07982/FPRO_02456/FPRO_12785/FPRO_03195/FPRO_13332/FPRO_02559/FPRO_00732/FPRO_08118/FPRO_01372/FPRO_03074/FPRO_11205/FPRO_04426/FPRO_10778/FPRO_06094/FPRO_08143/FPRO_03182/FPRO_13115/FPR…	63
MF	GO:0032553	ribonucleotide binding	61/780	298/3372	0.888543	1	0.981401	FPRO_00523/FPRO_05777/FPRO_00079/FPRO_15682/FPRO_04430/FPRO_05837/FPRO_09700/FPRO_08673/FPRO_07787/FPRO_13436/FPRO_12202/FPRO_02809/FPRO_04924/FPRO_13354/FPRO_07902/FPRO_11015/FPRO_02251/FPRO_07982/FPRO_02456/FPRO_12785/FPRO_03195/FPRO_13332/FPRO_02559/FPRO_00732/FPRO_08118/FPRO_01372/FPRO_03074/FPRO_11205/FPRO_04426/FPRO_10778/FPRO_06094/FPRO_08143/FPRO_03182/FPRO_13115/FPRO_06109/FPRO_02586/FPR…	61
MF	GO:0140096	catalytic activity, acting on a protein	95/780	453/3372	0.891821	1	0.981401	FPRO_11227/FPRO_14591/FPRO_11079/FPRO_08119/FPRO_09700/FPRO_06374/FPRO_06339/FPRO_00592/FPRO_04841/FPRO_04981/FPRO_06100/FPRO_10022/FPRO_06386/FPRO_02390/FPRO_02526/FPRO_13426/FPRO_09440/FPRO_01309/FPRO_13354/FPRO_09539/FPRO_04808/FPRO_08453/FPRO_10610/FPRO_04130/FPRO_07982/FPRO_09202/FPRO_01529/FPRO_04439/FPRO_05980/FPRO_02559/FPRO_03667/FPRO_14280/FPRO_10941/FPRO_08148/FPRO_01468/FPRO_08147/FPR…	95
MF	GO:0003743	translation initiation factor activity	5/780	32/3372	0.893918	1	0.981401	FPRO_14084/FPRO_10598/FPRO_05990/FPRO_06307/FPRO_00595	5
MF	GO:0005546	phosphatidylinositol-4,5-bisphosphate binding	2/780	15/3372	0.893949	1	0.981401	FPRO_11888/FPRO_08437	2
MF	GO:0009678	pyrophosphate hydrolysis-driven proton transmembrane transporter activity	2/780	15/3372	0.893949	1	0.981401	FPRO_00802/FPRO_04613	2
MF	GO:0019901	protein kinase binding	2/780	15/3372	0.893949	1	0.981401	FPRO_09700/FPRO_01114	2
MF	GO:0051213	dioxygenase activity	2/780	15/3372	0.893949	1	0.981401	FPRO_08458/FPRO_04555	2
MF	GO:0060590	ATPase regulator activity	3/780	21/3372	0.895716	1	0.981401	FPRO_11015/FPRO_11930/FPRO_09518	3
MF	GO:0005048	signal sequence binding	4/780	27/3372	0.901697	1	0.981401	FPRO_09503/FPRO_10362/FPRO_10995/FPRO_05178	4
MF	GO:0008408	3'-5' exonuclease activity	4/780	27/3372	0.901697	1	0.981401	FPRO_00693/FPRO_10729/FPRO_05958/FPRO_10735	4
MF	GO:0035639	purine ribonucleoside triphosphate binding	57/780	282/3372	0.90253	1	0.981401	FPRO_05777/FPRO_15682/FPRO_04430/FPRO_05837/FPRO_09700/FPRO_08673/FPRO_07787/FPRO_13436/FPRO_12202/FPRO_02809/FPRO_04924/FPRO_13354/FPRO_07902/FPRO_11015/FPRO_02251/FPRO_07982/FPRO_02456/FPRO_12785/FPRO_03195/FPRO_13332/FPRO_02559/FPRO_00732/FPRO_08118/FPRO_01372/FPRO_03074/FPRO_11205/FPRO_04426/FPRO_10778/FPRO_06094/FPRO_08143/FPRO_03182/FPRO_06109/FPRO_02586/FPRO_10705/FPRO_11930/FPRO_04613/FPR…	57
MF	GO:0017076	purine nucleotide binding	60/780	296/3372	0.903621	1	0.981401	FPRO_05777/FPRO_00079/FPRO_15682/FPRO_04430/FPRO_05837/FPRO_09700/FPRO_08673/FPRO_07787/FPRO_13436/FPRO_12202/FPRO_02809/FPRO_12793/FPRO_04924/FPRO_13354/FPRO_07902/FPRO_11015/FPRO_02251/FPRO_07982/FPRO_02456/FPRO_12785/FPRO_03195/FPRO_13332/FPRO_02559/FPRO_00732/FPRO_08118/FPRO_01372/FPRO_03074/FPRO_11205/FPRO_04426/FPRO_10778/FPRO_06094/FPRO_08143/FPRO_03182/FPRO_06109/FPRO_02586/FPRO_10705/FPR…	60
MF	GO:0030695	GTPase regulator activity	16/780	89/3372	0.905536	1	0.981401	FPRO_07794/FPRO_14081/FPRO_01294/FPRO_07487/FPRO_08143/FPRO_08089/FPRO_03153/FPRO_10598/FPRO_05990/FPRO_01510/FPRO_07945/FPRO_10709/FPRO_06307/FPRO_02759/FPRO_11091/FPRO_02712	16
MF	GO:0019899	enzyme binding	32/780	166/3372	0.90564	1	0.981401	FPRO_14009/FPRO_00498/FPRO_07794/FPRO_09700/FPRO_01294/FPRO_09955/FPRO_04439/FPRO_07487/FPRO_01114/FPRO_01020/FPRO_05969/FPRO_09816/FPRO_08143/FPRO_10598/FPRO_12974/FPRO_13383/FPRO_05990/FPRO_08523/FPRO_11888/FPRO_01510/FPRO_06307/FPRO_13431/FPRO_11091/FPRO_15375/FPRO_05260/FPRO_07915/FPRO_10669/FPRO_11923/FPRO_00910/FPRO_06165/FPRO_09436/FPRO_01227	32
MF	GO:0005085	guanyl-nucleotide exchange factor activity	7/780	44/3372	0.912215	1	0.981401	FPRO_07487/FPRO_08143/FPRO_10598/FPRO_05990/FPRO_01510/FPRO_06307/FPRO_11091	7
MF	GO:0004857	enzyme inhibitor activity	4/780	28/3372	0.916832	1	0.981401	FPRO_06403/FPRO_10729/FPRO_04612/FPRO_11941	4
MF	GO:0032555	purine ribonucleotide binding	58/780	290/3372	0.920292	1	0.981401	FPRO_05777/FPRO_00079/FPRO_15682/FPRO_04430/FPRO_05837/FPRO_09700/FPRO_08673/FPRO_07787/FPRO_13436/FPRO_12202/FPRO_02809/FPRO_04924/FPRO_13354/FPRO_07902/FPRO_11015/FPRO_02251/FPRO_07982/FPRO_02456/FPRO_12785/FPRO_03195/FPRO_13332/FPRO_02559/FPRO_00732/FPRO_08118/FPRO_01372/FPRO_03074/FPRO_11205/FPRO_04426/FPRO_10778/FPRO_06094/FPRO_08143/FPRO_03182/FPRO_06109/FPRO_02586/FPRO_10705/FPRO_11930/FPR…	58
MF	GO:0015631	tubulin binding	6/780	40/3372	0.927831	1	0.981401	FPRO_01200/FPRO_05206/FPRO_02759/FPRO_02466/FPRO_02800/FPRO_00375	6
MF	GO:0019888	protein phosphatase regulator activity	3/780	23/3372	0.928033	1	0.981401	FPRO_10829/FPRO_06403/FPRO_05728	3
MF	GO:0031072	heat shock protein binding	3/780	23/3372	0.928033	1	0.981401	FPRO_04335/FPRO_10778/FPRO_09789	3
MF	GO:0008198	ferrous iron binding	1/780	10/3372	0.928266	1	0.981401	FPRO_10572	1
MF	GO:0016653	oxidoreductase activity, acting on NAD(P)H, heme protein as acceptor	1/780	10/3372	0.928266	1	0.981401	FPRO_01395	1
MF	GO:0051010	microtubule plus-end binding	1/780	10/3372	0.928266	1	0.981401	FPRO_02800	1
MF	GO:0042162	telomeric DNA binding	2/780	17/3372	0.930639	1	0.981401	FPRO_00460/FPRO_01117	2
MF	GO:0008757	S-adenosylmethionine-dependent methyltransferase activity	13/780	77/3372	0.931092	1	0.981401	FPRO_08119/FPRO_03202/FPRO_09072/FPRO_10599/FPRO_06386/FPRO_09202/FPRO_10941/FPRO_07752/FPRO_03063/FPRO_05830/FPRO_10830/FPRO_09541/FPRO_05263	13
MF	GO:0019900	kinase binding	2/780	18/3372	0.944124	1	0.981401	FPRO_09700/FPRO_01114	2
MF	GO:0008139	nuclear localization sequence binding	1/780	11/3372	0.944908	1	0.981401	FPRO_09503	1
MF	GO:0046982	protein heterodimerization activity	1/780	11/3372	0.944908	1	0.981401	FPRO_10651	1
MF	GO:0060089	molecular transducer activity	1/780	11/3372	0.944908	1	0.981401	FPRO_10534	1
MF	GO:0061631	ubiquitin conjugating enzyme activity	1/780	11/3372	0.944908	1	0.981401	FPRO_09816	1
MF	GO:0060589	nucleoside-triphosphatase regulator activity	19/780	110/3372	0.948685	1	0.981401	FPRO_07794/FPRO_14081/FPRO_01294/FPRO_11015/FPRO_07487/FPRO_08143/FPRO_08089/FPRO_03153/FPRO_10598/FPRO_05990/FPRO_11930/FPRO_01510/FPRO_07945/FPRO_10709/FPRO_09518/FPRO_06307/FPRO_02759/FPRO_11091/FPRO_02712	19
MF	GO:0004386	helicase activity	11/780	70/3372	0.953709	1	0.981401	FPRO_04924/FPRO_09440/FPRO_02251/FPRO_08263/FPRO_04771/FPRO_10729/FPRO_08112/FPRO_15929/FPRO_12044/FPRO_00954/FPRO_04265	11
MF	GO:0004532	exoribonuclease activity	2/780	19/3372	0.955091	1	0.981401	FPRO_00693/FPRO_04842	2
MF	GO:0005200	structural constituent of cytoskeleton	2/780	19/3372	0.955091	1	0.981401	FPRO_00374/FPRO_02544	2
MF	GO:0016896	exoribonuclease activity, producing 5'-phosphomonoesters	2/780	19/3372	0.955091	1	0.981401	FPRO_00693/FPRO_04842	2
MF	GO:0003729	mRNA binding	27/780	151/3372	0.955211	1	0.981401	FPRO_06401/FPRO_00498/FPRO_03149/FPRO_10827/FPRO_01304/FPRO_09741/FPRO_01381/FPRO_10587/FPRO_10813/FPRO_03195/FPRO_01077/FPRO_08089/FPRO_02933/FPRO_04842/FPRO_11162/FPRO_05585/FPRO_12974/FPRO_09271/FPRO_04613/FPRO_08569/FPRO_01808/FPRO_08112/FPRO_07718/FPRO_09578/FPRO_01539/FPRO_05958/FPRO_10758	27
MF	GO:0030276	clathrin binding	1/780	12/3372	0.957694	1	0.981401	FPRO_06260	1
MF	GO:0016796	exonuclease activity, active with either ribo- or deoxyribonucleic acids and producing 5'-phosphomonoesters	4/780	32/3372	0.958595	1	0.981401	FPRO_00693/FPRO_04842/FPRO_10984/FPRO_05958	4
MF	GO:0016462	pyrophosphatase activity	62/780	319/3372	0.95879	1	0.981401	FPRO_15682/FPRO_04430/FPRO_05837/FPRO_01466/FPRO_15512/FPRO_04890/FPRO_08673/FPRO_03676/FPRO_01899/FPRO_02809/FPRO_04924/FPRO_09440/FPRO_05939/FPRO_13135/FPRO_02251/FPRO_00388/FPRO_07982/FPRO_12785/FPRO_13332/FPRO_11164/FPRO_08118/FPRO_10387/FPRO_01372/FPRO_04173/FPRO_10537/FPRO_03074/FPRO_11205/FPRO_10778/FPRO_02813/FPRO_03182/FPRO_09441/FPRO_10362/FPRO_00802/FPRO_02586/FPRO_08263/FPRO_04771/FPR…	62
MF	GO:0016817	hydrolase activity, acting on acid anhydrides	62/780	319/3372	0.95879	1	0.981401	FPRO_15682/FPRO_04430/FPRO_05837/FPRO_01466/FPRO_15512/FPRO_04890/FPRO_08673/FPRO_03676/FPRO_01899/FPRO_02809/FPRO_04924/FPRO_09440/FPRO_05939/FPRO_13135/FPRO_02251/FPRO_00388/FPRO_07982/FPRO_12785/FPRO_13332/FPRO_11164/FPRO_08118/FPRO_10387/FPRO_01372/FPRO_04173/FPRO_10537/FPRO_03074/FPRO_11205/FPRO_10778/FPRO_02813/FPRO_03182/FPRO_09441/FPRO_10362/FPRO_00802/FPRO_02586/FPRO_08263/FPRO_04771/FPR…	62
MF	GO:0016818	hydrolase activity, acting on acid anhydrides, in phosphorus-containing anhydrides	62/780	319/3372	0.95879	1	0.981401	FPRO_15682/FPRO_04430/FPRO_05837/FPRO_01466/FPRO_15512/FPRO_04890/FPRO_08673/FPRO_03676/FPRO_01899/FPRO_02809/FPRO_04924/FPRO_09440/FPRO_05939/FPRO_13135/FPRO_02251/FPRO_00388/FPRO_07982/FPRO_12785/FPRO_13332/FPRO_11164/FPRO_08118/FPRO_10387/FPRO_01372/FPRO_04173/FPRO_10537/FPRO_03074/FPRO_11205/FPRO_10778/FPRO_02813/FPRO_03182/FPRO_09441/FPRO_10362/FPRO_00802/FPRO_02586/FPRO_08263/FPRO_04771/FPR…	62
MF	GO:0016741	transferase activity, transferring one-carbon groups	17/780	102/3372	0.958804	1	0.981401	FPRO_13459/FPRO_11021/FPRO_08119/FPRO_03202/FPRO_09072/FPRO_10599/FPRO_06386/FPRO_09202/FPRO_10941/FPRO_07752/FPRO_03063/FPRO_00990/FPRO_05830/FPRO_10830/FPRO_09541/FPRO_02992/FPRO_05263	17
MF	GO:0000149	SNARE binding	3/780	26/3372	0.959614	1	0.981401	FPRO_01294/FPRO_04255/FPRO_02513	3
MF	GO:0003727	single-stranded RNA binding	3/780	26/3372	0.959614	1	0.981401	FPRO_01304/FPRO_10813/FPRO_11950	3
MF	GO:0016846	carbon-sulfur lyase activity	1/780	13/3372	0.967515	1	0.981401	FPRO_00772	1
MF	GO:0016866	intramolecular transferase activity	1/780	13/3372	0.967515	1	0.981401	FPRO_00819	1
MF	GO:0140142	nucleocytoplasmic carrier activity	1/780	13/3372	0.967515	1	0.981401	FPRO_04426	1
MF	GO:0030544	Hsp70 protein binding	2/780	21/3372	0.971166	1	0.981401	FPRO_04335/FPRO_09789	2
MF	GO:0043022	ribosome binding	2/780	21/3372	0.971166	1	0.981401	FPRO_14612/FPRO_04612	2
MF	GO:0008168	methyltransferase activity	15/780	95/3372	0.971752	1	0.981401	FPRO_13459/FPRO_11021/FPRO_08119/FPRO_03202/FPRO_09072/FPRO_10599/FPRO_06386/FPRO_09202/FPRO_10941/FPRO_07752/FPRO_03063/FPRO_05830/FPRO_10830/FPRO_09541/FPRO_05263	15
MF	GO:0008017	microtubule binding	3/780	28/3372	0.972856	1	0.981401	FPRO_05206/FPRO_02466/FPRO_02800	3
MF	GO:0001671	ATPase activator activity	1/780	14/3372	0.975058	1	0.981401	FPRO_09518	1
MF	GO:0061650	ubiquitin-like protein conjugating enzyme activity	1/780	14/3372	0.975058	1	0.981401	FPRO_09816	1
MF	GO:0140677	molecular function activator activity	1/780	14/3372	0.975058	1	0.981401	FPRO_09518	1
MF	GO:0043021	ribonucleoprotein complex binding	5/780	41/3372	0.975644	1	0.981401	FPRO_09741/FPRO_14612/FPRO_02933/FPRO_08112/FPRO_04612	5
MF	GO:0017111	ribonucleoside triphosphate phosphatase activity	56/780	299/3372	0.977089	1	0.981401	FPRO_15682/FPRO_04430/FPRO_05837/FPRO_04890/FPRO_08673/FPRO_03676/FPRO_02809/FPRO_04924/FPRO_09440/FPRO_05939/FPRO_13135/FPRO_02251/FPRO_00388/FPRO_07982/FPRO_12785/FPRO_13332/FPRO_11164/FPRO_08118/FPRO_10387/FPRO_01372/FPRO_04173/FPRO_03074/FPRO_11205/FPRO_10778/FPRO_02813/FPRO_03182/FPRO_09441/FPRO_10362/FPRO_00802/FPRO_02586/FPRO_08263/FPRO_04771/FPRO_11870/FPRO_04613/FPRO_11903/FPRO_10729/FPR…	56
MF	GO:0004672	protein kinase activity	16/780	102/3372	0.977138	1	0.981401	FPRO_09700/FPRO_10022/FPRO_13354/FPRO_07982/FPRO_02559/FPRO_08143/FPRO_10903/FPRO_05887/FPRO_10705/FPRO_05294/FPRO_13355/FPRO_04154/FPRO_09628/FPRO_02968/FPRO_04756/FPRO_09466	16
MF	GO:0051087	chaperone binding	1/780	15/3372	0.980852	1	0.981401	FPRO_10778	1
MF	GO:0008092	cytoskeletal protein binding	11/780	77/3372	0.981688	1	0.981401	FPRO_08085/FPRO_01200/FPRO_05206/FPRO_06152/FPRO_02759/FPRO_04612/FPRO_02466/FPRO_05221/FPRO_02800/FPRO_00375/FPRO_01006	11
MF	GO:0008047	enzyme activator activity	18/780	116/3372	0.984977	1	0.981401	FPRO_07794/FPRO_14081/FPRO_01294/FPRO_03153/FPRO_08259/FPRO_10910/FPRO_02941/FPRO_07945/FPRO_10709/FPRO_09518/FPRO_00710/FPRO_02759/FPRO_02883/FPRO_02712/FPRO_13265/FPRO_00670/FPRO_01559/FPRO_03375	18
MF	GO:0016893	endonuclease activity, active with either ribo- or deoxyribonucleic acids and producing 5'-phosphomonoesters	1/780	16/3372	0.985301	1	0.981401	FPRO_10984	1
MF	GO:0000175	3'-5'-exoribonuclease activity	1/780	17/3372	0.988717	1	0.981401	FPRO_00693	1
MF	GO:0030234	enzyme regulator activity	39/780	226/3372	0.989566	1	0.981401	FPRO_07794/FPRO_14081/FPRO_01294/FPRO_02362/FPRO_11015/FPRO_07487/FPRO_14612/FPRO_08143/FPRO_08089/FPRO_10829/FPRO_03153/FPRO_10598/FPRO_05990/FPRO_06219/FPRO_08259/FPRO_10910/FPRO_11930/FPRO_02941/FPRO_01510/FPRO_07945/FPRO_06403/FPRO_10709/FPRO_09518/FPRO_10729/FPRO_06307/FPRO_04271/FPRO_00710/FPRO_02759/FPRO_02883/FPRO_11091/FPRO_02712/FPRO_13265/FPRO_04612/FPRO_11010/FPRO_00670/FPRO_05728/FPR…	39
MF	GO:0098772	molecular function regulator activity	39/780	227/3372	0.990503	1	0.981401	FPRO_07794/FPRO_14081/FPRO_01294/FPRO_02362/FPRO_11015/FPRO_07487/FPRO_14612/FPRO_08143/FPRO_08089/FPRO_10829/FPRO_03153/FPRO_10598/FPRO_05990/FPRO_06219/FPRO_08259/FPRO_10910/FPRO_11930/FPRO_02941/FPRO_01510/FPRO_07945/FPRO_06403/FPRO_10709/FPRO_09518/FPRO_10729/FPRO_06307/FPRO_04271/FPRO_00710/FPRO_02759/FPRO_02883/FPRO_11091/FPRO_02712/FPRO_13265/FPRO_04612/FPRO_11010/FPRO_00670/FPRO_05728/FPR…	39
MF	GO:0140101	catalytic activity, acting on a tRNA	11/780	82/3372	0.991019	1	0.981401	FPRO_05585/FPRO_02869/FPRO_07881/FPRO_13000/FPRO_03697/FPRO_11960/FPRO_01419/FPRO_05780/FPRO_10828/FPRO_08519/FPRO_04358	11
MF	GO:0019207	kinase regulator activity	4/780	44/3372	0.995855	1	0.981401	FPRO_14612/FPRO_08259/FPRO_04271/FPRO_04612	4
MF	GO:0005198	structural molecule activity	34/780	211/3372	0.996224	1	0.981401	FPRO_11978/FPRO_00374/FPRO_12967/FPRO_02251/FPRO_06309/FPRO_09551/FPRO_09599/FPRO_00412/FPRO_09503/FPRO_04796/FPRO_11162/FPRO_03466/FPRO_08259/FPRO_04791/FPRO_09518/FPRO_03121/FPRO_11884/FPRO_04938/FPRO_06385/FPRO_08074/FPRO_08477/FPRO_09162/FPRO_09417/FPRO_03203/FPRO_09578/FPRO_06206/FPRO_07937/FPRO_04697/FPRO_01338/FPRO_04886/FPRO_01540/FPRO_09513/FPRO_02544/FPRO_10758	34
MF	GO:0004674	protein serine/threonine kinase activity	11/780	88/3372	0.996361	1	0.981401	FPRO_09700/FPRO_10022/FPRO_13354/FPRO_07982/FPRO_02559/FPRO_08143/FPRO_10705/FPRO_13355/FPRO_09628/FPRO_02968/FPRO_04756	11
MF	GO:0004518	nuclease activity	9/780	77/3372	0.996789	1	0.981401	FPRO_05837/FPRO_10385/FPRO_00693/FPRO_09441/FPRO_04842/FPRO_10984/FPRO_10729/FPRO_05958/FPRO_10735	9
MF	GO:0019843	rRNA binding	3/780	39/3372	0.997318	1	0.981401	FPRO_11884/FPRO_09578/FPRO_04697	3
MF	GO:0030295	protein kinase activator activity	1/780	24/3372	0.998233	1	0.981401	FPRO_08259	1
MF	GO:0030674	protein-macromolecule adaptor activity	10/780	88/3372	0.998594	1	0.981401	FPRO_10428/FPRO_06156/FPRO_01662/FPRO_06309/FPRO_01020/FPRO_00460/FPRO_04255/FPRO_10408/FPRO_15375/FPRO_06352	10
MF	GO:0019887	protein kinase regulator activity	3/780	42/3372	0.998614	1	0.981401	FPRO_08259/FPRO_04271/FPRO_04612	3
MF	GO:0019209	kinase activator activity	1/780	25/3372	0.998645	1	0.981401	FPRO_08259	1
MF	GO:0060090	molecular adaptor activity	10/780	89/3372	0.99881	1	0.981401	FPRO_10428/FPRO_06156/FPRO_01662/FPRO_06309/FPRO_01020/FPRO_00460/FPRO_04255/FPRO_10408/FPRO_15375/FPRO_06352	10
MF	GO:0004519	endonuclease activity	3/780	43/3372	0.99889	1	0.981401	FPRO_05837/FPRO_10385/FPRO_10984	3
MF	GO:0140640	catalytic activity, acting on a nucleic acid	48/780	300/3372	0.99943	1	0.981401	FPRO_01460/FPRO_02525/FPRO_05837/FPRO_09159/FPRO_10385/FPRO_11862/FPRO_02809/FPRO_04924/FPRO_09440/FPRO_09716/FPRO_02251/FPRO_00693/FPRO_01423/FPRO_11164/FPRO_11799/FPRO_04842/FPRO_13115/FPRO_05585/FPRO_02869/FPRO_08263/FPRO_04771/FPRO_07881/FPRO_11870/FPRO_10984/FPRO_13000/FPRO_03697/FPRO_11960/FPRO_10729/FPRO_01311/FPRO_08112/FPRO_04812/FPRO_01419/FPRO_15929/FPRO_07858/FPRO_05780/FPRO_00740/FPR…	48
MF	GO:0003735	structural constituent of ribosome	16/780	132/3372	0.999637	1	0.981401	FPRO_12967/FPRO_11162/FPRO_04791/FPRO_03121/FPRO_11884/FPRO_04938/FPRO_08477/FPRO_09162/FPRO_03203/FPRO_09578/FPRO_06206/FPRO_07937/FPRO_04697/FPRO_04886/FPRO_09513/FPRO_10758	16
MF	GO:0030515	snoRNA binding	1/780	30/3372	0.999641	1	0.981401	FPRO_02603	1
MF	GO:0003924	GTPase activity	6/780	71/3372	0.99971	1	0.981401	FPRO_13332/FPRO_03074/FPRO_10362/FPRO_07951/FPRO_09277/FPRO_05070	6
MF	GO:0004540	ribonuclease activity	2/780	41/3372	0.99974	1	0.981401	FPRO_00693/FPRO_04842	2
MF	GO:0001882	nucleoside binding	6/780	76/3372	0.999894	1	0.981401	FPRO_13332/FPRO_08118/FPRO_03074/FPRO_04426/FPRO_13115/FPRO_09277	6
MF	GO:0032549	ribonucleoside binding	6/780	76/3372	0.999894	1	0.981401	FPRO_13332/FPRO_08118/FPRO_03074/FPRO_04426/FPRO_13115/FPRO_09277	6
MF	GO:0003723	RNA binding	69/780	430/3372	0.999956	1	0.981401	FPRO_06401/FPRO_00498/FPRO_03149/FPRO_03267/FPRO_10827/FPRO_01304/FPRO_09741/FPRO_01381/FPRO_10587/FPRO_10813/FPRO_04785/FPRO_00693/FPRO_03195/FPRO_09339/FPRO_01372/FPRO_08148/FPRO_03074/FPRO_14084/FPRO_11059/FPRO_01077/FPRO_08089/FPRO_10598/FPRO_05024/FPRO_02933/FPRO_09503/FPRO_04842/FPRO_13115/FPRO_01370/FPRO_11162/FPRO_05585/FPRO_10362/FPRO_12974/FPRO_05990/FPRO_09271/FPRO_11674/FPRO_04613/FPR…	69
MF	GO:0005525	GTP binding	5/780	73/3372	0.999957	1	0.981401	FPRO_13332/FPRO_08118/FPRO_03074/FPRO_04426/FPRO_09277	5
MF	GO:0001883	purine nucleoside binding	5/780	75/3372	0.999972	1	0.981401	FPRO_13332/FPRO_08118/FPRO_03074/FPRO_04426/FPRO_09277	5
MF	GO:0032550	purine ribonucleoside binding	5/780	75/3372	0.999972	1	0.981401	FPRO_13332/FPRO_08118/FPRO_03074/FPRO_04426/FPRO_09277	5
MF	GO:0032561	guanyl ribonucleotide binding	5/780	75/3372	0.999972	1	0.981401	FPRO_13332/FPRO_08118/FPRO_03074/FPRO_04426/FPRO_09277	5
MF	GO:0019001	guanyl nucleotide binding	5/780	76/3372	0.999977	1	0.981401	FPRO_13332/FPRO_08118/FPRO_03074/FPRO_04426/FPRO_09277	5
MF	GO:0003724	RNA helicase activity	1/780	43/3372	0.999989	1	0.981401	FPRO_08112	1
MF	GO:0008186	ATP-dependent activity, acting on RNA	1/780	44/3372	0.999991	1	0.981401	FPRO_08112	1
MF	GO:0140098	catalytic activity, acting on RNA	18/780	198/3372	1	1	0.981401	FPRO_11862/FPRO_09716/FPRO_00693/FPRO_04842/FPRO_13115/FPRO_05585/FPRO_02869/FPRO_07881/FPRO_13000/FPRO_03697/FPRO_11960/FPRO_08112/FPRO_01419/FPRO_05780/FPRO_10828/FPRO_08519/FPRO_03133/FPRO_04358	18
CC	GO:0009898	cytoplasmic side of plasma membrane	7/866	22/3758	0.227386	1	0.92477	FPRO_00664/FPRO_00592/FPRO_10022/FPRO_04560/FPRO_00931/FPRO_07951/FPRO_02615	7
CC	GO:0005793	endoplasmic reticulum-Golgi intermediate compartment	4/866	11/3758	0.234195	1	0.92477	FPRO_08479/FPRO_02712/FPRO_05807/FPRO_08565	4
CC	GO:0016586	RSC-type complex	4/866	11/3758	0.234195	1	0.92477	FPRO_04924/FPRO_04672/FPRO_03158/FPRO_00842	4
CC	GO:0030014	CCR4-NOT complex	4/866	11/3758	0.234195	1	0.92477	FPRO_04430/FPRO_09518/FPRO_03378/FPRO_03334	4
CC	GO:0030015	CCR4-NOT core complex	4/866	11/3758	0.234195	1	0.92477	FPRO_04430/FPRO_09518/FPRO_03378/FPRO_03334	4
CC	GO:0048471	perinuclear region of cytoplasm	4/866	11/3758	0.234195	1	0.92477	FPRO_06323/FPRO_05865/FPRO_10022/FPRO_03182	4
CC	GO:0044232	organelle membrane contact site	9/866	30/3758	0.238676	1	0.92477	FPRO_09459/FPRO_05063/FPRO_04774/FPRO_09152/FPRO_10408/FPRO_02968/FPRO_08452/FPRO_01589/FPRO_09466	9
CC	GO:0099023	vesicle tethering complex	10/866	34/3758	0.241895	1	0.92477	FPRO_06240/FPRO_05969/FPRO_08479/FPRO_04255/FPRO_08523/FPRO_03069/FPRO_11888/FPRO_05807/FPRO_08565/FPRO_04758	10
CC	GO:0016592	mediator complex	5/866	15/3758	0.250584	1	0.92477	FPRO_02531/FPRO_13283/FPRO_07870/FPRO_00412/FPRO_05085	5
CC	GO:0005774	vacuolar membrane	46/866	182/3758	0.25759	1	0.92477	FPRO_00223/FPRO_03170/FPRO_06531/FPRO_08673/FPRO_12998/FPRO_06100/FPRO_10022/FPRO_11293/FPRO_13241/FPRO_01372/FPRO_06047/FPRO_06269/FPRO_05969/FPRO_03353/FPRO_08089/FPRO_03542/FPRO_03217/FPRO_00802/FPRO_10705/FPRO_10408/FPRO_04926/FPRO_04613/FPRO_08225/FPRO_01758/FPRO_01661/FPRO_02968/FPRO_02814/FPRO_09277/FPRO_01891/FPRO_00814/FPRO_06352/FPRO_04588/FPRO_04758/FPRO_07950/FPRO_04527/FPRO_04884/FPR…	46
CC	GO:0030117	membrane coat	9/866	31/3758	0.272461	1	0.92477	FPRO_06156/FPRO_04244/FPRO_11644/FPRO_01118/FPRO_02471/FPRO_05899/FPRO_02712/FPRO_06260/FPRO_10995	9
CC	GO:0048475	coated membrane	9/866	31/3758	0.272461	1	0.92477	FPRO_06156/FPRO_04244/FPRO_11644/FPRO_01118/FPRO_02471/FPRO_05899/FPRO_02712/FPRO_06260/FPRO_10995	9
CC	GO:0070210	Rpd3L-Expanded complex	4/866	12/3758	0.291484	1	0.92477	FPRO_03063/FPRO_04545/FPRO_03427/FPRO_01227	4
CC	GO:0000329	fungal-type vacuole membrane	43/866	172/3758	0.294058	1	0.92477	FPRO_00223/FPRO_03170/FPRO_08673/FPRO_12998/FPRO_06100/FPRO_10022/FPRO_11293/FPRO_13241/FPRO_01372/FPRO_06047/FPRO_06269/FPRO_05969/FPRO_03353/FPRO_08089/FPRO_03542/FPRO_03217/FPRO_00802/FPRO_10705/FPRO_10408/FPRO_04926/FPRO_04613/FPRO_08225/FPRO_01758/FPRO_01661/FPRO_02968/FPRO_02814/FPRO_09277/FPRO_01891/FPRO_00814/FPRO_06352/FPRO_04588/FPRO_04758/FPRO_07950/FPRO_04527/FPRO_04884/FPRO_00804/FPR…	43
CC	GO:0042763	intracellular immature spore	15/866	56/3758	0.297974	1	0.92477	FPRO_05805/FPRO_09483/FPRO_10610/FPRO_06394/FPRO_06152/FPRO_08124/FPRO_08523/FPRO_03069/FPRO_03045/FPRO_11888/FPRO_02471/FPRO_09628/FPRO_08257/FPRO_00670/FPRO_09466	15
CC	GO:0042764	ascospore-type prospore	15/866	56/3758	0.297974	1	0.92477	FPRO_05805/FPRO_09483/FPRO_10610/FPRO_06394/FPRO_06152/FPRO_08124/FPRO_08523/FPRO_03069/FPRO_03045/FPRO_11888/FPRO_02471/FPRO_09628/FPRO_08257/FPRO_00670/FPRO_09466	15
CC	GO:0098796	membrane protein complex	65/866	265/3758	0.298805	1	0.92477	FPRO_04742/FPRO_04841/FPRO_13293/FPRO_09459/FPRO_11605/FPRO_11606/FPRO_13426/FPRO_05939/FPRO_06156/FPRO_04130/FPRO_06283/FPRO_06133/FPRO_04343/FPRO_02530/FPRO_05063/FPRO_03064/FPRO_03336/FPRO_01468/FPRO_07698/FPRO_05969/FPRO_08173/FPRO_06400/FPRO_09599/FPRO_07711/FPRO_04244/FPRO_04774/FPRO_03105/FPRO_08384/FPRO_02642/FPRO_09411/FPRO_00802/FPRO_00577/FPRO_03045/FPRO_02941/FPRO_04613/FPRO_08162/FPR…	65
CC	GO:0032161	cleavage apparatus septin structure	5/866	16/3758	0.300379	1	0.92477	FPRO_09700/FPRO_10941/FPRO_06152/FPRO_06358/FPRO_09719	5
CC	GO:0032541	cortical endoplasmic reticulum	5/866	16/3758	0.300379	1	0.92477	FPRO_04702/FPRO_03182/FPRO_04746/FPRO_01365/FPRO_04778	5
CC	GO:0005643	nuclear pore	10/866	36/3758	0.306678	1	0.92477	FPRO_06309/FPRO_01266/FPRO_01077/FPRO_02933/FPRO_09503/FPRO_04796/FPRO_00798/FPRO_02968/FPRO_07724/FPRO_08074	10
CC	GO:0098852	lytic vacuole membrane	43/866	173/3758	0.30919	1	0.92477	FPRO_00223/FPRO_03170/FPRO_08673/FPRO_12998/FPRO_06100/FPRO_10022/FPRO_11293/FPRO_13241/FPRO_01372/FPRO_06047/FPRO_06269/FPRO_05969/FPRO_03353/FPRO_08089/FPRO_03542/FPRO_03217/FPRO_00802/FPRO_10705/FPRO_10408/FPRO_04926/FPRO_04613/FPRO_08225/FPRO_01758/FPRO_01661/FPRO_02968/FPRO_02814/FPRO_09277/FPRO_01891/FPRO_00814/FPRO_06352/FPRO_04588/FPRO_04758/FPRO_07950/FPRO_04527/FPRO_04884/FPRO_00804/FPR…	43
CC	GO:0005768	endosome	33/866	133/3758	0.343552	1	0.92477	FPRO_05805/FPRO_06531/FPRO_01002/FPRO_10022/FPRO_06133/FPRO_06394/FPRO_10509/FPRO_11205/FPRO_05969/FPRO_08143/FPRO_08479/FPRO_09599/FPRO_04526/FPRO_04255/FPRO_09310/FPRO_08124/FPRO_04176/FPRO_03045/FPRO_02941/FPRO_01758/FPRO_02968/FPRO_15066/FPRO_06260/FPRO_05807/FPRO_08565/FPRO_04758/FPRO_04527/FPRO_03585/FPRO_08273/FPRO_04731/FPRO_09436/FPRO_05178/FPRO_09466	33
CC	GO:0000407	phagophore assembly site	7/866	25/3758	0.348789	1	0.92477	FPRO_07721/FPRO_08479/FPRO_10705/FPRO_08437/FPRO_04684/FPRO_08273/FPRO_09466	7
CC	GO:0098797	plasma membrane protein complex	6/866	21/3758	0.350667	1	0.92477	FPRO_11605/FPRO_11606/FPRO_11644/FPRO_02471/FPRO_07951/FPRO_02615	6
CC	GO:0071782	endoplasmic reticulum tubular network	5/866	17/3758	0.351496	1	0.92477	FPRO_04702/FPRO_03182/FPRO_04746/FPRO_01365/FPRO_04778	5
CC	GO:0035861	site of double-strand break	12/866	46/3758	0.365283	1	0.92477	FPRO_05837/FPRO_09440/FPRO_08263/FPRO_08259/FPRO_10984/FPRO_10729/FPRO_07858/FPRO_09138/FPRO_05043/FPRO_12044/FPRO_03133/FPRO_00797	12
CC	GO:0090734	site of DNA damage	12/866	46/3758	0.365283	1	0.92477	FPRO_05837/FPRO_09440/FPRO_08263/FPRO_08259/FPRO_10984/FPRO_10729/FPRO_07858/FPRO_09138/FPRO_05043/FPRO_12044/FPRO_03133/FPRO_00797	12
CC	GO:0098562	cytoplasmic side of membrane	8/866	30/3758	0.385474	1	0.92477	FPRO_00664/FPRO_00592/FPRO_10022/FPRO_04560/FPRO_00931/FPRO_00477/FPRO_07951/FPRO_02615	8
CC	GO:0005844	polysome	7/866	26/3758	0.391065	1	0.92477	FPRO_14612/FPRO_01372/FPRO_11930/FPRO_08569/FPRO_08112/FPRO_09416/FPRO_01539	7
CC	GO:0016469	proton-transporting two-sector ATPase complex	7/866	26/3758	0.391065	1	0.92477	FPRO_05939/FPRO_08384/FPRO_00802/FPRO_04613/FPRO_09417/FPRO_04760/FPRO_03223	7
CC	GO:0000131	incipient cellular bud site	12/866	47/3758	0.396677	1	0.92477	FPRO_02236/FPRO_09700/FPRO_07487/FPRO_10903/FPRO_06152/FPRO_08523/FPRO_03069/FPRO_11888/FPRO_11091/FPRO_00670/FPRO_09719/FPRO_09436	12
CC	GO:0030136	clathrin-coated vesicle	6/866	22/3758	0.396898	1	0.92477	FPRO_03153/FPRO_13383/FPRO_11644/FPRO_02471/FPRO_15375/FPRO_06260	6
CC	GO:0031225	anchored component of membrane	6/866	22/3758	0.396898	1	0.92477	FPRO_02236/FPRO_01028/FPRO_15017/FPRO_15453/FPRO_09394/FPRO_11680	6
CC	GO:0046658	anchored component of plasma membrane	6/866	22/3758	0.396898	1	0.92477	FPRO_02236/FPRO_01028/FPRO_15017/FPRO_15453/FPRO_09394/FPRO_11680	6
CC	GO:0019897	extrinsic component of plasma membrane	4/866	14/3758	0.409147	1	0.92477	FPRO_10022/FPRO_01387/FPRO_07951/FPRO_02615	4
CC	GO:0033177	proton-transporting two-sector ATPase complex, proton-transporting domain	4/866	14/3758	0.409147	1	0.92477	FPRO_05939/FPRO_08384/FPRO_09417/FPRO_03223	4
CC	GO:0042575	DNA polymerase complex	4/866	14/3758	0.409147	1	0.92477	FPRO_09159/FPRO_11799/FPRO_00767/FPRO_05958	4
CC	GO:1905360	GTPase complex	4/866	14/3758	0.409147	1	0.92477	FPRO_07487/FPRO_10941/FPRO_07951/FPRO_02615	4
CC	GO:0031234	extrinsic component of cytoplasmic side of plasma membrane	3/866	10/3758	0.415097	1	0.92477	FPRO_10022/FPRO_07951/FPRO_02615	3
CC	GO:0005635	nuclear envelope	22/866	90/3758	0.415513	1	0.92477	FPRO_08188/FPRO_06309/FPRO_10463/FPRO_11799/FPRO_04426/FPRO_01266/FPRO_03521/FPRO_01077/FPRO_08143/FPRO_10381/FPRO_03182/FPRO_02933/FPRO_09503/FPRO_04796/FPRO_02642/FPRO_09056/FPRO_00798/FPRO_04271/FPRO_02968/FPRO_13100/FPRO_07724/FPRO_08074	22
CC	GO:0030120	vesicle coat	7/866	27/3758	0.433373	1	0.92477	FPRO_06156/FPRO_11644/FPRO_01118/FPRO_02471/FPRO_02712/FPRO_06260/FPRO_10995	7
CC	GO:0031312	extrinsic component of organelle membrane	6/866	23/3758	0.442954	1	0.92477	FPRO_07694/FPRO_02869/FPRO_03542/FPRO_01661/FPRO_06352/FPRO_09420	6
CC	GO:0032993	protein-DNA complex	15/866	62/3758	0.463705	1	0.92477	FPRO_06020/FPRO_11799/FPRO_01020/FPRO_00460/FPRO_10953/FPRO_13085/FPRO_02586/FPRO_08259/FPRO_10729/FPRO_00736/FPRO_01311/FPRO_07858/FPRO_00740/FPRO_13052/FPRO_00954	15
CC	GO:0005656	nuclear pre-replicative complex	4/866	15/3758	0.466806	1	0.92477	FPRO_06020/FPRO_02586/FPRO_00736/FPRO_13052	4
CC	GO:0031306	intrinsic component of mitochondrial outer membrane	4/866	15/3758	0.466806	1	0.92477	FPRO_01395/FPRO_09691/FPRO_14473/FPRO_10872	4
CC	GO:0031307	integral component of mitochondrial outer membrane	4/866	15/3758	0.466806	1	0.92477	FPRO_01395/FPRO_09691/FPRO_14473/FPRO_10872	4
CC	GO:0036387	pre-replicative complex	4/866	15/3758	0.466806	1	0.92477	FPRO_06020/FPRO_02586/FPRO_00736/FPRO_13052	4
CC	GO:0044815	DNA packaging complex	11/866	45/3758	0.46899	1	0.92477	FPRO_00374/FPRO_13283/FPRO_11164/FPRO_01114/FPRO_00460/FPRO_02959/FPRO_12047/FPRO_13085/FPRO_07879/FPRO_04771/FPRO_11870	11
CC	GO:0098552	side of membrane	11/866	45/3758	0.46899	1	0.92477	FPRO_00664/FPRO_15017/FPRO_00592/FPRO_10022/FPRO_04560/FPRO_00931/FPRO_09394/FPRO_00477/FPRO_07951/FPRO_11680/FPRO_02615	11
CC	GO:0005770	late endosome	10/866	41/3758	0.479043	1	0.92477	FPRO_01002/FPRO_06133/FPRO_10509/FPRO_05969/FPRO_09310/FPRO_02968/FPRO_15066/FPRO_04527/FPRO_03585/FPRO_05178	10
CC	GO:0030118	clathrin coat	3/866	11/3758	0.482936	1	0.92477	FPRO_11644/FPRO_02471/FPRO_06260	3
CC	GO:0030125	clathrin vesicle coat	3/866	11/3758	0.482936	1	0.92477	FPRO_11644/FPRO_02471/FPRO_06260	3
CC	GO:0090726	cortical dynamic polarity patch	3/866	11/3758	0.482936	1	0.92477	FPRO_07487/FPRO_07951/FPRO_04158	3
CC	GO:0098588	bounding membrane of organelle	94/866	405/3758	0.48796	1	0.92477	FPRO_00223/FPRO_04742/FPRO_08475/FPRO_03170/FPRO_08499/FPRO_06531/FPRO_08673/FPRO_12998/FPRO_01395/FPRO_01427/FPRO_09620/FPRO_09072/FPRO_06100/FPRO_04803/FPRO_10022/FPRO_06496/FPRO_11293/FPRO_13452/FPRO_08456/FPRO_06156/FPRO_01417/FPRO_09955/FPRO_06318/FPRO_10529/FPRO_00388/FPRO_06133/FPRO_13241/FPRO_02530/FPRO_01372/FPRO_06047/FPRO_06269/FPRO_03278/FPRO_04516/FPRO_06094/FPRO_03521/FPRO_05969/FPR…	94
CC	GO:0070603	SWI/SNF superfamily-type complex	8/866	33/3758	0.502376	1	0.92477	FPRO_04924/FPRO_02251/FPRO_13283/FPRO_04672/FPRO_03158/FPRO_00842/FPRO_04922/FPRO_08500	8
CC	GO:0001411	hyphal tip	5/866	20/3758	0.503547	1	0.92477	FPRO_13463/FPRO_15322/FPRO_07677/FPRO_06152/FPRO_11888	5
CC	GO:0071011	precatalytic spliceosome	5/866	20/3758	0.503547	1	0.92477	FPRO_03267/FPRO_08239/FPRO_00643/FPRO_01685/FPRO_08247	5
CC	GO:0005721	pericentric heterochromatin	7/866	29/3758	0.516265	1	0.92477	FPRO_09716/FPRO_01114/FPRO_13085/FPRO_08135/FPRO_03427/FPRO_13123/FPRO_01165	7
CC	GO:0009897	external side of plasma membrane	4/866	16/3758	0.522282	1	0.92477	FPRO_15017/FPRO_00592/FPRO_09394/FPRO_11680	4
CC	GO:0000152	nuclear ubiquitin ligase complex	6/866	25/3758	0.532294	1	0.92477	FPRO_05808/FPRO_10910/FPRO_13100/FPRO_11010/FPRO_00910/FPRO_01559	6
CC	GO:0000932	P-body	8/866	34/3758	0.539994	1	0.92477	FPRO_01381/FPRO_10813/FPRO_00693/FPRO_04842/FPRO_08569/FPRO_09518/FPRO_03378/FPRO_08247	8
CC	GO:0031097	medial cortex	8/866	34/3758	0.539994	1	0.92477	FPRO_09700/FPRO_06152/FPRO_02933/FPRO_09727/FPRO_10709/FPRO_09628/FPRO_06358/FPRO_09719	8
CC	GO:1904949	ATPase complex	10/866	43/3758	0.546475	1	0.92477	FPRO_04924/FPRO_02251/FPRO_13283/FPRO_04672/FPRO_03158/FPRO_00842/FPRO_01311/FPRO_04922/FPRO_00740/FPRO_08500	10
CC	GO:0005669	transcription factor TFIID complex	3/866	12/3758	0.546753	1	0.92477	FPRO_13283/FPRO_01020/FPRO_03466	3
CC	GO:0033178	proton-transporting two-sector ATPase complex, catalytic domain	3/866	12/3758	0.546753	1	0.92477	FPRO_00802/FPRO_04613/FPRO_04760	3
CC	GO:0005741	mitochondrial outer membrane	17/866	74/3758	0.551765	1	0.92477	FPRO_08499/FPRO_01395/FPRO_01427/FPRO_09620/FPRO_09072/FPRO_06496/FPRO_13452/FPRO_01417/FPRO_06318/FPRO_03278/FPRO_06094/FPRO_03163/FPRO_09691/FPRO_09437/FPRO_08452/FPRO_14473/FPRO_10872	17
CC	GO:0019867	outer membrane	17/866	74/3758	0.551765	1	0.92477	FPRO_08499/FPRO_01395/FPRO_01427/FPRO_09620/FPRO_09072/FPRO_06496/FPRO_13452/FPRO_01417/FPRO_06318/FPRO_03278/FPRO_06094/FPRO_03163/FPRO_09691/FPRO_09437/FPRO_08452/FPRO_14473/FPRO_10872	17
CC	GO:0031968	organelle outer membrane	17/866	74/3758	0.551765	1	0.92477	FPRO_08499/FPRO_01395/FPRO_01427/FPRO_09620/FPRO_09072/FPRO_06496/FPRO_13452/FPRO_01417/FPRO_06318/FPRO_03278/FPRO_06094/FPRO_03163/FPRO_09691/FPRO_09437/FPRO_08452/FPRO_14473/FPRO_10872	17
CC	GO:0051286	cell tip	36/866	158/3758	0.563564	1	0.92477	FPRO_15412/FPRO_09770/FPRO_13463/FPRO_07088/FPRO_04054/FPRO_14295/FPRO_10925/FPRO_01294/FPRO_15322/FPRO_13332/FPRO_08085/FPRO_07487/FPRO_07677/FPRO_10941/FPRO_04560/FPRO_10829/FPRO_10903/FPRO_06152/FPRO_04255/FPRO_09727/FPRO_00666/FPRO_06123/FPRO_08523/FPRO_03069/FPRO_11888/FPRO_11644/FPRO_06403/FPRO_10709/FPRO_09548/FPRO_07847/FPRO_04746/FPRO_06358/FPRO_10995/FPRO_05221/FPRO_04158/FPRO_10679	36
CC	GO:0060187	cell pole	36/866	158/3758	0.563564	1	0.92477	FPRO_15412/FPRO_09770/FPRO_13463/FPRO_07088/FPRO_04054/FPRO_14295/FPRO_10925/FPRO_01294/FPRO_15322/FPRO_13332/FPRO_08085/FPRO_07487/FPRO_07677/FPRO_10941/FPRO_04560/FPRO_10829/FPRO_10903/FPRO_06152/FPRO_04255/FPRO_09727/FPRO_00666/FPRO_06123/FPRO_08523/FPRO_03069/FPRO_11888/FPRO_11644/FPRO_06403/FPRO_10709/FPRO_09548/FPRO_07847/FPRO_04746/FPRO_06358/FPRO_10995/FPRO_05221/FPRO_04158/FPRO_10679	36
CC	GO:0140534	endoplasmic reticulum protein-containing complex	15/866	66/3758	0.573006	1	0.92477	FPRO_04841/FPRO_13293/FPRO_13426/FPRO_12967/FPRO_04130/FPRO_02530/FPRO_03064/FPRO_05864/FPRO_08173/FPRO_06400/FPRO_03182/FPRO_00577/FPRO_11988/FPRO_08452/FPRO_04517	15
CC	GO:0031410	cytoplasmic vesicle	47/866	208/3758	0.59082	1	0.92477	FPRO_05805/FPRO_06531/FPRO_01002/FPRO_10022/FPRO_06156/FPRO_09955/FPRO_06318/FPRO_06133/FPRO_06394/FPRO_10509/FPRO_07677/FPRO_11205/FPRO_05969/FPRO_08143/FPRO_08479/FPRO_09599/FPRO_03153/FPRO_04526/FPRO_04255/FPRO_13383/FPRO_09310/FPRO_08124/FPRO_04176/FPRO_03045/FPRO_02941/FPRO_11644/FPRO_01118/FPRO_01758/FPRO_02471/FPRO_02968/FPRO_15066/FPRO_04746/FPRO_02712/FPRO_15375/FPRO_06260/FPRO_05807/FPR…	47
CC	GO:0097708	intracellular vesicle	47/866	208/3758	0.59082	1	0.92477	FPRO_05805/FPRO_06531/FPRO_01002/FPRO_10022/FPRO_06156/FPRO_09955/FPRO_06318/FPRO_06133/FPRO_06394/FPRO_10509/FPRO_07677/FPRO_11205/FPRO_05969/FPRO_08143/FPRO_08479/FPRO_09599/FPRO_03153/FPRO_04526/FPRO_04255/FPRO_13383/FPRO_09310/FPRO_08124/FPRO_04176/FPRO_03045/FPRO_02941/FPRO_11644/FPRO_01118/FPRO_01758/FPRO_02471/FPRO_02968/FPRO_15066/FPRO_04746/FPRO_02712/FPRO_15375/FPRO_06260/FPRO_05807/FPR…	47
CC	GO:0009295	nucleoid	5/866	22/3758	0.596741	1	0.92477	FPRO_00501/FPRO_01513/FPRO_07903/FPRO_06219/FPRO_09295	5
CC	GO:0032156	septin cytoskeleton	5/866	22/3758	0.596741	1	0.92477	FPRO_09700/FPRO_10941/FPRO_06152/FPRO_06358/FPRO_09719	5
CC	GO:0042645	mitochondrial nucleoid	5/866	22/3758	0.596741	1	0.92477	FPRO_00501/FPRO_01513/FPRO_07903/FPRO_06219/FPRO_09295	5
CC	GO:0005933	cellular bud	36/866	160/3758	0.597951	1	0.92477	FPRO_11978/FPRO_08071/FPRO_01028/FPRO_09700/FPRO_05082/FPRO_12998/FPRO_01294/FPRO_10610/FPRO_07487/FPRO_04373/FPRO_10941/FPRO_04560/FPRO_10829/FPRO_10903/FPRO_06152/FPRO_04255/FPRO_09727/FPRO_00666/FPRO_06123/FPRO_08523/FPRO_00421/FPRO_03069/FPRO_11888/FPRO_07945/FPRO_02471/FPRO_09628/FPRO_07847/FPRO_04746/FPRO_11091/FPRO_08257/FPRO_05963/FPRO_00670/FPRO_09328/FPRO_10652/FPRO_09719/FPRO_09436	36
CC	GO:0030665	clathrin-coated vesicle membrane	3/866	13/3758	0.605691	1	0.92477	FPRO_11644/FPRO_02471/FPRO_06260	3
CC	GO:0031233	intrinsic component of external side of plasma membrane	3/866	13/3758	0.605691	1	0.92477	FPRO_15017/FPRO_09394/FPRO_11680	3
CC	GO:0031362	anchored component of external side of plasma membrane	3/866	13/3758	0.605691	1	0.92477	FPRO_15017/FPRO_09394/FPRO_11680	3
CC	GO:0070822	Sin3-type complex	3/866	13/3758	0.605691	1	0.92477	FPRO_04545/FPRO_03427/FPRO_01227	3
[truncated: 1,646 more rows]

## Sheet: RNA-seq_BCP_vs_CK_KEGG down
Term Name	MainClass	GeneHitsInSelectedSet	AllGenesInSelectedSet	GeneHitsInBackground	AllGenesInBackground	p-value	enrichFactor	GeneListInSelectedSets	corrected p-value(BH method)
[truncated: 17 more rows]

[truncated: 1 more sheets: RNA-seq_BCP_vs_CK_KEGG up]
