# Supplementary material for: β-caryophyllene regulates H3K36me3 to inhibit spore germination and mycelial growth of Fusarium proliferatum
Source: Research Square preprint supplement (doi:10.21203/rs.3.rs-5517661/v1), 2025-06-24
Supplement: Supplementary file 2 [file a24eef39fa9151291e1c9c84.docx]

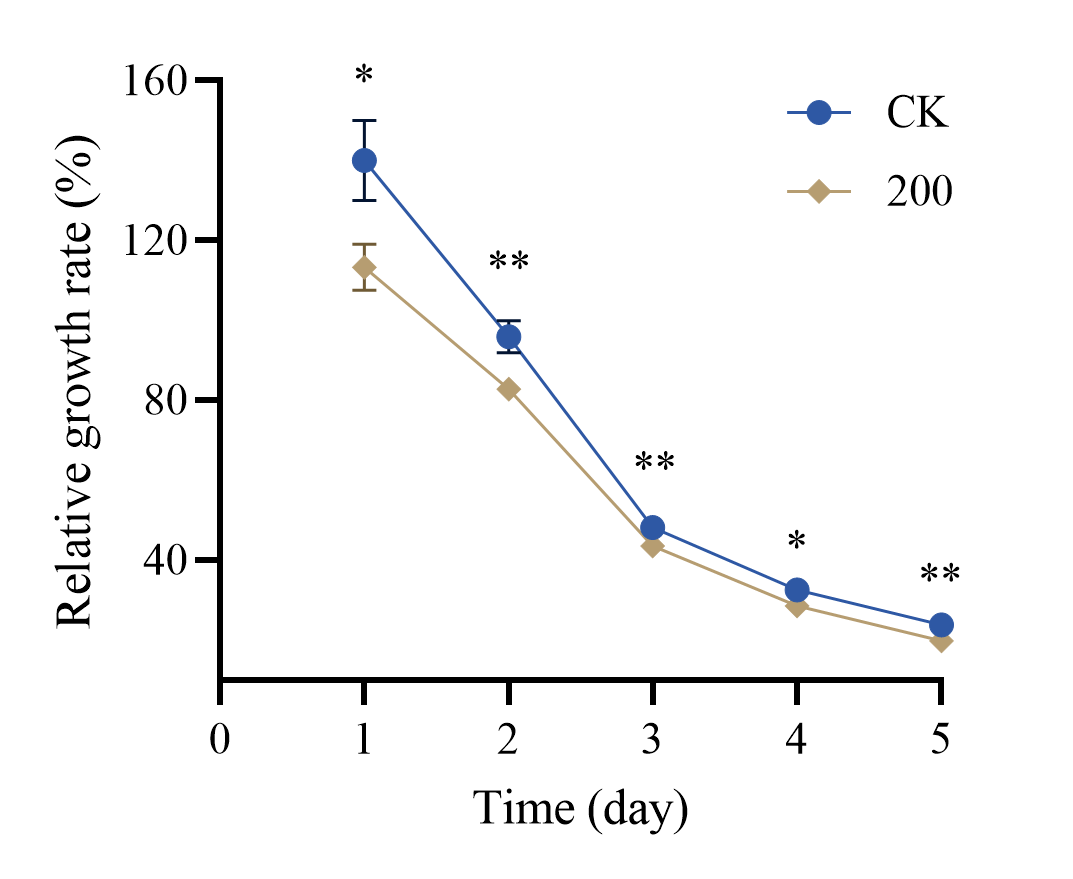


Figure S1. Growth rate comparison of *F. proliferatum* under 200 mM BCP treatment vs. control (n= 5 d cultivation). Control group (CK): 2% DMSO + 0.1% Tween-80 suspension. Data represent mean ± SD of three biological replicates (each with three technical replicates). Data are presented as mean ± SD from three biological replicates; * *p* < 0.05; ** *p* < 0.01.


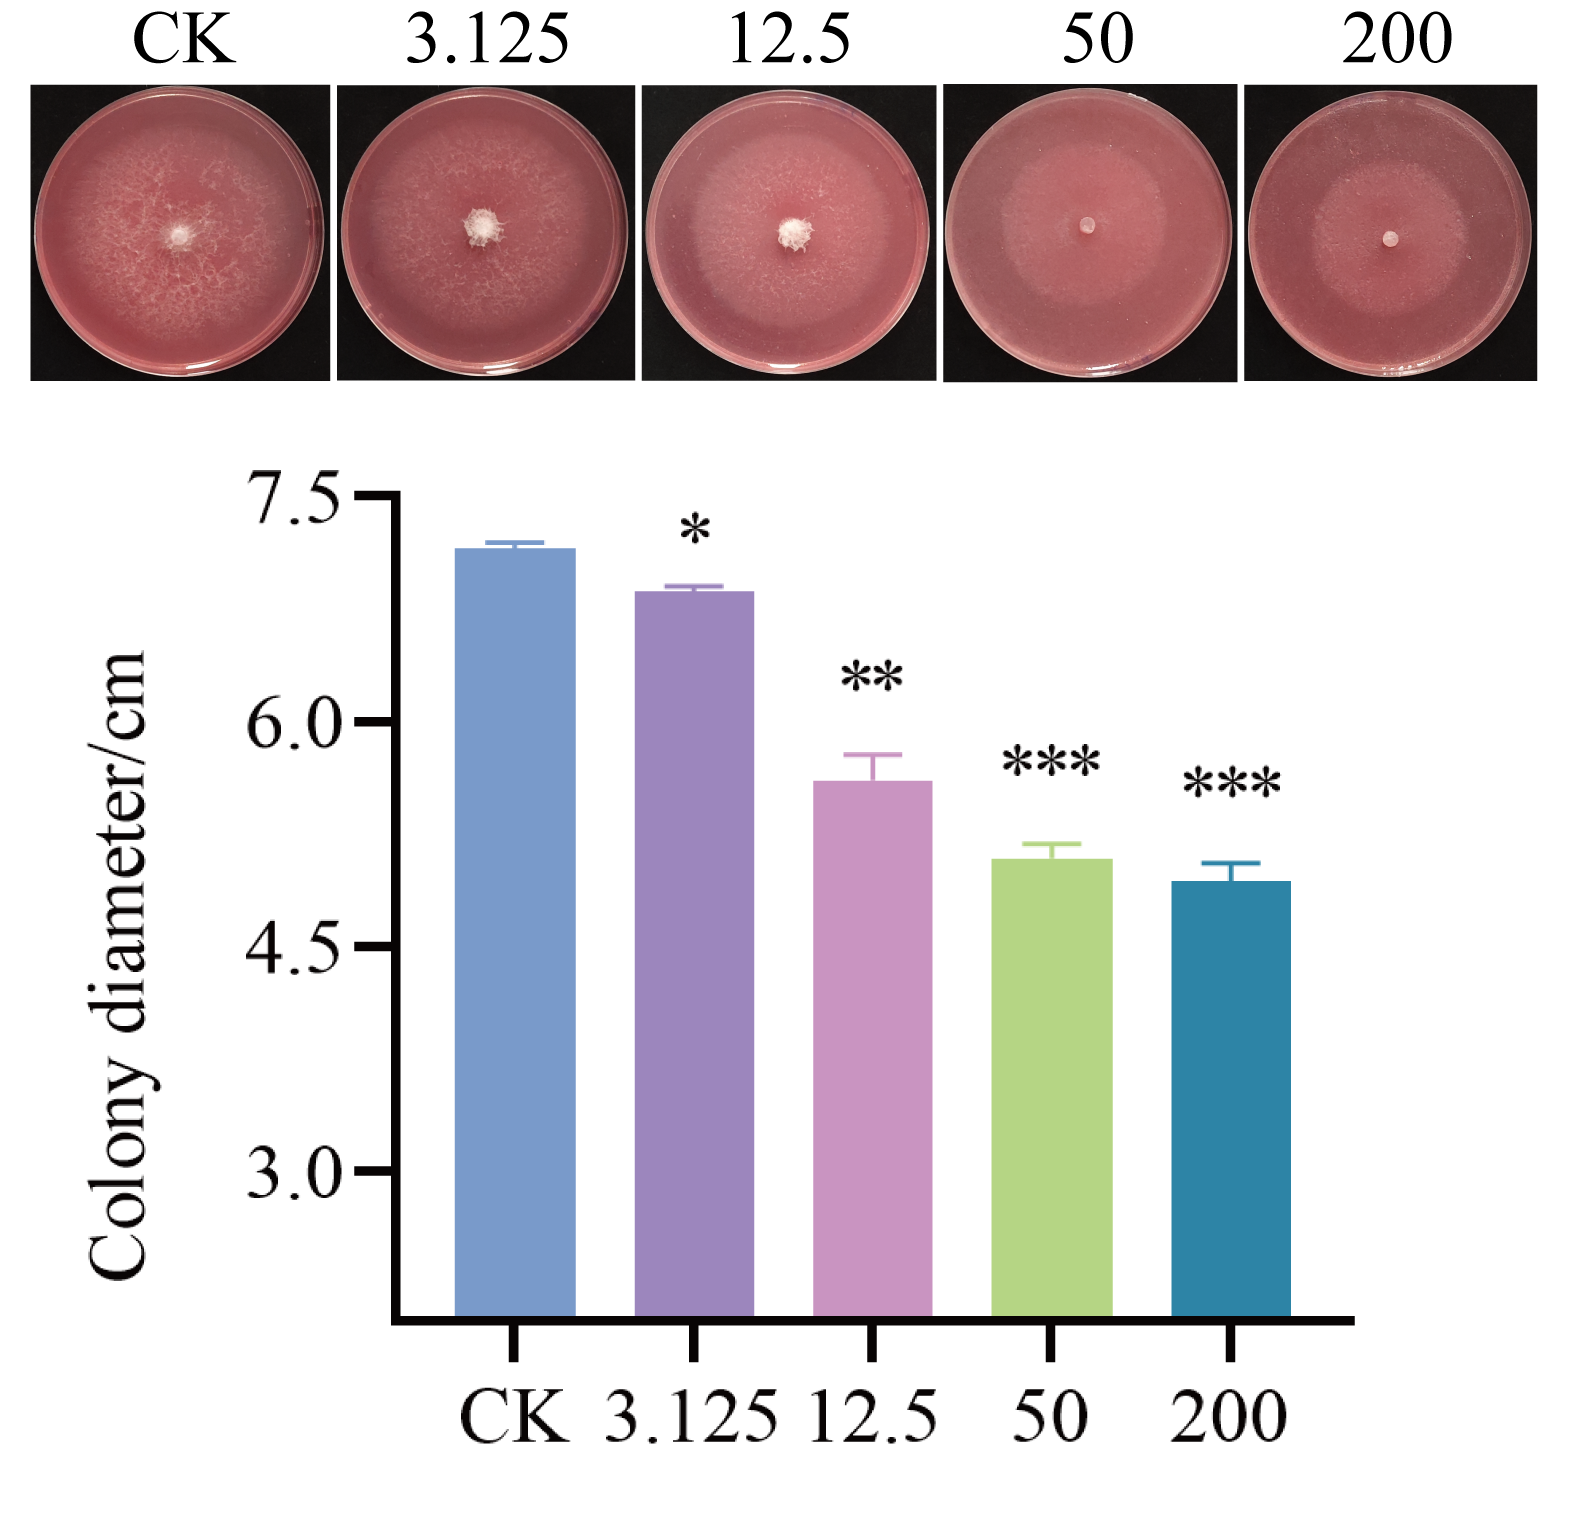


Figure S2. The colony morphology of *F. proliferatum* treated with different concentrations of BCP for 5 days in Congo red medium. Control group (CK): 2% DMSO + 0.1% Tween-80 suspension. Data represent mean ± SD of three biological replicates (each with three technical replicates). Data are presented as mean ± SD from three biological replicates; * *p* < 0.05; ** *p* < 0.01; *** *p* < 0.001.

Marker CK BCP

Marker CK BCP

Marker CK BCP

C

B

A


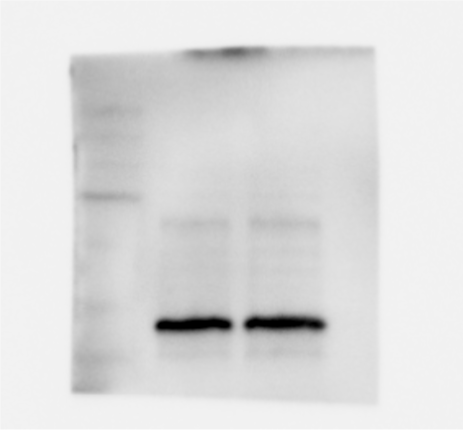

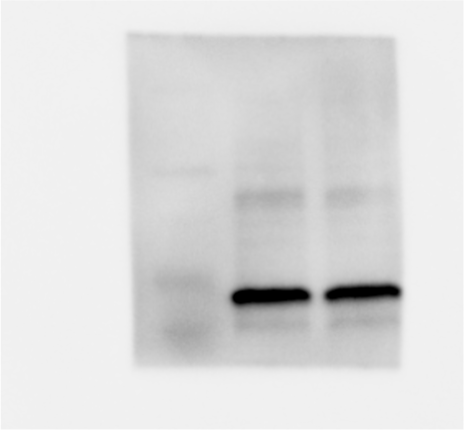

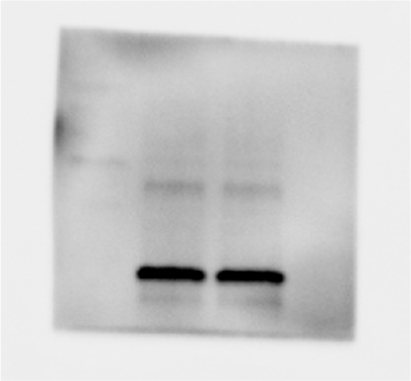


10kd→

15kd→

25kd→

45kd→

35kd→

60kd→

180kd→

75kd→

100kd→

140kd→

Marker CK BCP

Marker CK BCP

F

E

D


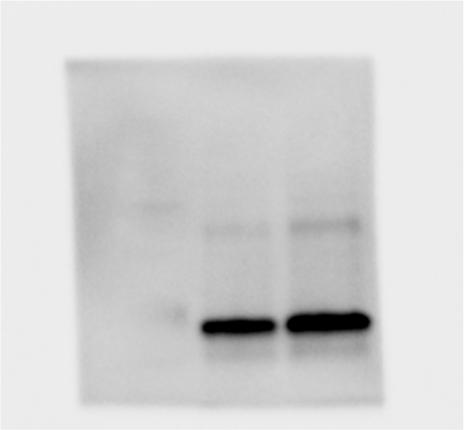

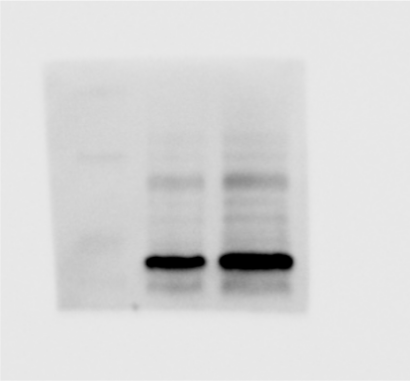

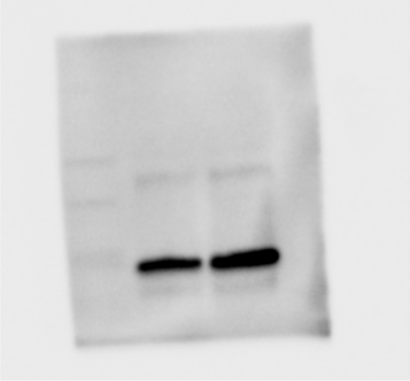


180kd→

140kd→

100kd→

75kd→

60kd→

45kd→

35kd→

25kd→

10kd→

15kd→

Marker CK BCP

Figure S3. Three independent biological replicates of Western blotting. (A, B, C) Immunoblot analysis of anti-H3 levels in *F. proliferatum*. A, B and C are three biological replicates. (D, E, F) Immunoblot analysis of anti-H3K36me3 levels in *F. proliferatum*. D, E and F are three biological replicates. Figure 3A in the revised manuscript is cropped from A and D.

Table S1. Primers for RT-qPCR.

| Gene ID | Forward primer (5′ to 3′) | Reverse primer(5′ to 3′) | Gene name/decription |
| --- | --- | --- | --- |
| *FPRO_08120* | TCCTCCACAAGCCCACATTC | GCTCTCTGATGACAGACCCG | Probable transcription activator protein acu-15 |
| *FPRO_05178* | CTTTGTGGCAGAACGTGAGC | AGATCGGCTCCGTCTTGTTG | Related to MRL1 Mannose 6-phosphate Receptor Like |
| *FPRO_01387* | TGTCACAGCCTGCTCTCTTG | GCCGAGGAAGAGGTAGTTCG | Serine/threonine-protein phosphatase |
| *FPRO_11793* | TATGGTGGTAGCAAGCACGG | TCGTCTGTCGAGAACTTGGC | aldehyde dehydrogenase (NAD(+)) |
| *FPRO_02568* | GGAGGTTCTCAGGACCAAGC | GGCTTCGGGGATACCTTGAG | Squalene monooxygenase |
| *FPRO_05179* | CATGAACTGCTCTTGGTGCG | GGCACCCAAACAATATCGCC | Delta(14)-sterol reductase |
| *FPRO_08143* | TGTGGAGCTGCGGTGTTATT | GATGAGATTTGCAGCGCCAG | putative serine/threonine protein kinase (SNF1) |
| *FPRO_09694* | AAGAGCCACCTAACCAGCAC | AGGATCCATGGGCATGTTGG | Probable transcription factor of the MADS box family MCM1 |
| *FPRO_11870* | CGGACATGCCCTATCTGTCC | TCTAACGCGGCGTCTACTTC | Structural maintenance of chromosomes protein |
| *QTUB* | TTCTGCTGTCATGTCCGGTGT | TCAGAGGAGCAAAGCCAACCA | Quantitative Tubulin |

Table S2. Primers for ChIP-qPCR.

| Genes name | Forward primer (5′ to 3′) | Reverse primer (5′ to 3′) | Gene name/decription |
| --- | --- | --- | --- |
| *FPRO_02568* | TTCTCCTGGGTGACGCTATG | AAGATCAGACACCTTGCTGGG | Squalene monooxygenase |
| *FPRO_05179* | AATGAGCCCGCGATTTTGAC | ATAAGACCCAGCATACCGGC | Delta(14)-sterol reductase |
| *FPRO_08143* | GTGCTCATCAACGACGAACC | CGTCCATACGCAACTGACTTC | putative serine/threonine protein kinase (SNF1) |
| *FPRO_09694* | ACCGGACTCGTTTACACCTTC | TCGCGATCAGTCTACGGTCTA | Probable transcription factor of the MADS box family MCM1 |
| *FPRO_11870* | GGAACAGGCTTCCGCTAACA | AGCCTGGAGTGTTTCGACTG | Structural maintenance of chromosomes protein |
