# Supplementary material for: β-caryophyllene regulates H3K36me3 to inhibit spore germination and mycelial growth of Fusarium proliferatum
Source: Research Square preprint supplement (doi:10.21203/rs.3.rs-5517661/v1), 2025-06-24
Supplement: Supplementary file 3 [file e44d7f23bd6981650359ec06.xlsx]

## Sheet: ChIP-seq (DEGs)_BCP_vs_CK
geneId	transcriptId	fold_enrichment	direction
FPRO_02155	XM_031226816.1	2.40326	down
FPRO_02154	XM_031227927.1	2.04067	down
FPRO_02154	XM_031227927.1	1.46693	down
FPRO_02153	XM_031229038.1	2.06192	down
FPRO_02151	XM_031231260.1	2.42329	down
FPRO_02149	XM_031233482.1	1.54208	down
FPRO_02148	XM_031218458.1	1.64884	down
FPRO_02147	XM_031219569.1	1.88314	down
FPRO_02147	XM_031219569.1	2.0922	down
FPRO_02146	XM_031220680.1	1.79138	down
FPRO_02145	XM_031221791.1	1.48051	down
FPRO_02144	XM_031222902.1	1.48927	down
FPRO_02143	XM_031224013.1	1.6064	down
FPRO_02141	XM_031225372.1	1.95578	down
FPRO_02140	XM_031225483.1	1.4669	down
FPRO_02139	XM_031225594.1	1.74322	down
FPRO_02139	XM_031225594.1	1.40829	down
FPRO_02138	XM_031225706.1	1.62217	down
FPRO_02137	XM_031225817.1	1.66377	down
FPRO_02137	XM_031225817.1	1.93606	down
FPRO_02136	XM_031225928.1	1.9947	down
FPRO_02134	XM_031226150.1	2.53492	down
FPRO_02133	XM_031226261.1	1.91651	down
FPRO_02131	XM_031226483.1	1.6095	down
FPRO_02129	XM_031226705.1	2.38169	down
FPRO_02128	XM_031226817.1	1.75582	down
FPRO_02128	XM_031226817.1	2.27451	down
FPRO_02126	XM_031227039.1	2.18848	down
FPRO_02125	XM_031227150.1	2.37529	down
FPRO_02123	XM_031227372.1	1.8616	down
FPRO_02122	XM_031227483.1	1.80024	down
FPRO_02122	XM_031227483.1	1.52557	down
FPRO_02122	XM_031227483.1	1.46686	down
FPRO_02121	XM_031227594.1	1.9041	down
FPRO_02120	XM_031227705.1	1.95967	down
FPRO_02119	XM_031227816.1	1.91492	down
FPRO_02119	XM_031227816.1	1.87207	down
FPRO_02118	XM_031227928.1	2.35669	down
FPRO_02117	XM_031228039.1	2.11149	down
FPRO_02116	XM_031228150.1	2.15926	down
FPRO_02115	XM_031228261.1	2.21819	down
FPRO_02114	XM_031228372.1	1.76014	down
FPRO_02112	XM_031228594.1	2.10608	down
FPRO_02111	XM_031228705.1	1.53075	down
FPRO_02111	XM_031228705.1	2.02794	down
FPRO_02109	XM_031228927.1	1.71123	down
FPRO_02108	XM_031229039.1	1.70468	down
FPRO_02104	XM_031229483.1	1.50603	down
FPRO_02103	XM_031229594.1	2.16784	down
FPRO_02102	XM_031229705.1	1.84694	down
FPRO_02101	XM_031229816.1	1.73167	down
FPRO_02100	XM_031229927.1	1.81443	down
FPRO_02099	XM_031230038.1	2.32215	down
FPRO_02097	XM_031230261.1	2.2407	down
FPRO_02096	XM_031230372.1	2.39998	down
FPRO_02096	XM_031230372.1	1.64409	down
FPRO_02095	XM_031230483.1	2.16879	down
FPRO_02094	XM_031230594.1	2.10507	down
FPRO_02093	XM_031230705.1	2.07018	down
FPRO_02090	XM_031231038.1	2.29168	down
FPRO_02088	XM_031231261.1	2.42118	down
FPRO_02083	XM_031231816.1	1.61574	down
FPRO_02081	XM_031232038.1	1.48648	down
FPRO_02080	XM_031232149.1	2.06192	down
FPRO_02080	XM_031232149.1	2.25467	down
FPRO_02079	XM_031232260.1	1.61081	down
FPRO_02079	XM_031232260.1	2.07431	down
FPRO_02078	XM_031232372.1	2.08132	down
FPRO_02077	XM_031232483.1	1.84467	down
FPRO_02076	XM_031232594.1	1.85844	down
FPRO_02076	XM_031232594.1	1.89194	down
FPRO_02075	XM_031232705.1	2.06192	down
FPRO_02070	XM_031233260.1	1.55395	down
FPRO_02069	XM_031233371.1	1.99637	down
FPRO_02068	XM_031233483.1	1.63006	down
FPRO_02067	XM_031233594.1	2.05745	down
FPRO_02067	XM_031233594.1	1.78098	down
FPRO_02066	XM_031233705.1	1.82401	down
FPRO_02065	XM_031233816.1	2.42275	down
FPRO_02062	XM_031234149.1	2.1412	down
FPRO_02061	XM_031234260.1	1.38739	down
FPRO_02059	XM_031234482.1	1.6851	down
FPRO_02059	XM_031234482.1	2.13085	down
FPRO_02057	XM_031218570.1	2.58408	down
FPRO_02055	XM_031218792.1	1.70713	down
FPRO_02054	XM_031218903.1	1.53622	down
FPRO_02053	XM_031219014.1	2.04955	down
FPRO_02053	XM_031219014.1	2.26695	down
FPRO_02052	XM_031219125.1	2.48504	down
FPRO_02051	XM_031219236.1	2.17962	down
FPRO_02049	XM_031219347.1	2.19771	down
FPRO_02048	XM_031219458.1	2.60136	down
FPRO_02046	XM_031219681.1	1.46683	down
FPRO_02045	XM_031219792.1	2.3281	down
FPRO_02044	XM_031219903.1	1.95578	down
FPRO_02044	XM_031219903.1	2.3035	down
FPRO_02044	XM_031219903.1	1.53651	down
FPRO_02043	XM_031220014.1	1.78415	down
FPRO_02043	XM_031220014.1	2.29935	down
FPRO_02043	XM_031220014.1	1.83362	down
FPRO_02042	XM_031220125.1	1.62331	down
FPRO_02041	XM_031220236.1	2.49288	down
FPRO_02039	XM_031220458.1	2.26107	down
FPRO_02038	XM_031220569.1	2.13153	down
FPRO_02038	XM_031220569.1	1.78415	down
FPRO_02038	XM_031220569.1	1.73462	down
FPRO_02037	XM_031220681.1	1.66033	down
FPRO_02037	XM_031220681.1	1.8282	down
FPRO_02032	XM_031221236.1	1.77803	down
FPRO_02030	XM_031221458.1	1.65485	down
FPRO_02028	XM_031221680.1	1.85635	down
FPRO_02027	XM_031221792.1	2.22026	down
FPRO_02027	XM_031221792.1	2.29563	down
FPRO_02027	XM_031221792.1	1.8282	down
FPRO_02026	XM_031221903.1	1.7076	down
FPRO_02025	XM_031222014.1	2.12122	down
FPRO_02024	XM_031222125.1	1.56452	down
FPRO_02023	XM_031222236.1	2.33433	down
FPRO_02022	XM_031222347.1	1.84694	down
FPRO_02021	XM_031222458.1	1.76014	down
FPRO_02021	XM_031222458.1	1.94131	down
FPRO_02020	XM_031222569.1	1.79923	down
FPRO_02019	XM_031222680.1	1.84945	down
FPRO_02019	XM_031222680.1	1.69483	down
FPRO_02016	XM_031223014.1	1.4331	down
FPRO_02016	XM_031223014.1	1.7848	down
FPRO_02015	XM_031223125.1	2.35137	down
FPRO_02014	XM_031223236.1	1.52328	down
FPRO_02013	XM_031223347.1	1.77239	down
FPRO_02013	XM_031223347.1	1.85536	down
FPRO_02013	XM_031223347.1	2.15031	down
FPRO_02011	XM_031223569.1	1.48496	down
FPRO_02011	XM_031223569.1	1.76962	down
FPRO_02010	XM_031223680.1	1.95155	down
FPRO_02009	XM_031223791.1	2.31113	down
FPRO_02008	XM_031223902.1	1.89863	down
FPRO_02008	XM_031223902.1	1.6253	down
FPRO_02007	XM_031224014.1	2.23189	down
FPRO_02006	XM_031224125.1	2.14872	down
FPRO_02005	XM_031224236.1	1.67058	down
FPRO_02004	XM_031224347.1	2.32896	down
FPRO_02002	XM_031224569.1	2.20007	down
FPRO_02001	XM_031224680.1	1.82245	down
FPRO_02000	XM_031224791.1	1.91776	down
FPRO_01999	XM_031224902.1	1.66902	down
FPRO_01998	XM_031225013.1	1.84694	down
FPRO_01997	XM_031225125.1	1.77627	down
FPRO_01996	XM_031225236.1	1.79275	down
FPRO_01996	XM_031225236.1	1.95989	down
FPRO_01995	XM_031225284.1	1.48496	down
FPRO_01995	XM_031225284.1	1.59928	down
FPRO_01994	XM_031225295.1	2.02989	down
FPRO_01991	XM_031225328.1	2.01196	down
FPRO_01989	XM_031225350.1	1.88314	down
FPRO_01988	XM_031225361.1	1.34965	down
FPRO_01987	XM_031225373.1	1.89697	down
FPRO_01983	XM_031225417.1	2.11122	down
FPRO_01981	XM_031225439.1	1.82885	down
FPRO_01980	XM_031225450.1	2.42097	down
FPRO_01979	XM_031225461.1	2.14758	down
FPRO_01978	XM_031225472.1	2.32896	down
FPRO_01977	XM_031225484.1	2.51294	down
FPRO_01977	XM_031225484.1	1.83368	down
FPRO_01975	XM_031225506.1	2.18038	down
FPRO_01974	XM_031225517.1	1.78991	down
FPRO_01971	XM_031225550.1	1.31653	down
FPRO_01970	XM_031225561.1	2.14691	down
FPRO_01968	XM_031225583.1	2.75286	down
FPRO_01967	XM_031225595.1	1.6095	down
FPRO_01963	XM_031225639.1	2.23892	down
FPRO_01961	XM_031225661.1	1.70986	down
FPRO_01956	XM_031225718.1	1.4331	down
FPRO_01954	XM_031225740.1	1.48366	down
FPRO_01953	XM_031225751.1	1.75203	down
FPRO_01952	XM_031225762.1	1.96444	down
FPRO_01952	XM_031225762.1	1.3692	down
FPRO_01951	XM_031225773.1	1.4978	down
FPRO_01951	XM_031225773.1	1.77622	down
FPRO_01949	XM_031225795.1	1.55969	down
FPRO_01948	XM_031225806.1	2.39287	down
FPRO_01946	XM_031225829.1	1.83348	down
FPRO_01945	XM_031225840.1	2.16784	down
FPRO_01944	XM_031225851.1	2.16328	down
FPRO_01942	XM_031225873.1	1.57297	down
FPRO_01941	XM_031225884.1	1.35413	down
FPRO_01941	XM_031225884.1	1.57519	down
FPRO_01940	XM_031225895.1	1.78728	down
FPRO_01939	XM_031225906.1	1.62287	down
FPRO_01938	XM_031225917.1	1.77193	down
FPRO_01937	XM_031225929.1	1.67627	down
FPRO_01935	XM_031225951.1	1.65823	down
FPRO_01934	XM_031225962.1	1.61574	down
FPRO_01933	XM_031225973.1	1.89639	down
FPRO_01932	XM_031225984.1	2.04886	down
FPRO_01929	XM_031226017.1	1.52594	down
FPRO_01928	XM_031226028.1	1.6851	down
FPRO_01926	XM_031226051.1	1.42931	down
FPRO_01924	XM_031226073.1	1.77032	down
FPRO_01924	XM_031226073.1	2.03179	down
FPRO_01923	XM_031226084.1	1.66803	down
FPRO_01921	XM_031226106.1	1.54208	down
FPRO_01918	XM_031226139.1	1.9113	down
FPRO_01916	XM_031226162.1	1.50174	down
FPRO_01914	XM_031226184.1	1.68779	down
FPRO_01914	XM_031226184.1	1.48049	down
FPRO_01914	XM_031226184.1	1.84835	down
FPRO_01913	XM_031226195.1	1.66263	down
FPRO_01913	XM_031226195.1	1.70986	down
FPRO_01908	XM_031226250.1	1.69236	down
FPRO_01907	XM_031226262.1	1.72862	down
FPRO_01903	XM_031226306.1	1.78778	down
FPRO_01902	XM_031226317.1	1.42625	down
FPRO_01901	XM_031226328.1	1.77193	down
FPRO_01900	XM_031226339.1	1.69627	down
FPRO_01900	XM_031226339.1	1.78831	down
FPRO_01896	XM_031226384.1	1.72569	down
FPRO_01893	XM_031226417.1	1.53609	down
FPRO_01892	XM_031226428.1	2.13153	down
FPRO_01892	XM_031226428.1	1.74632	down
FPRO_01891	XM_031226439.1	2.01571	down
FPRO_01891	XM_031226439.1	1.53075	down
FPRO_01890	XM_031226450.1	2.0768	down
FPRO_01889	XM_031226461.1	1.99818	down
FPRO_01888	XM_031226472.1	1.43575	down
FPRO_01888	XM_031226472.1	1.57275	down
FPRO_01886	XM_031226495.1	1.46686	down
FPRO_01886	XM_031226495.1	1.63658	down
FPRO_01879	XM_031226572.1	1.84899	down
FPRO_01878	XM_031226583.1	1.67396	down
FPRO_01876	XM_031226606.1	1.88526	down
FPRO_01875	XM_031226617.1	1.78641	down
FPRO_01875	XM_031226617.1	1.93444	down
FPRO_01874	XM_031226628.1	1.50769	down
FPRO_01873	XM_031226639.1	1.4331	down
FPRO_01872	XM_031226650.1	2.24732	down
FPRO_01870	XM_031226672.1	1.32018	down
FPRO_01866	XM_031226717.1	1.58604	down
FPRO_01866	XM_031226717.1	1.68918	down
FPRO_01865	XM_031226728.1	1.52557	down
FPRO_01864	XM_031226739.1	1.53651	down
FPRO_01864	XM_031226739.1	1.56878	down
FPRO_01864	XM_031226739.1	1.59011	down
FPRO_01863	XM_031226750.1	1.58914	down
FPRO_01861	XM_031226772.1	2.09533	down
FPRO_01858	XM_031226805.1	1.77933	down
FPRO_01858	XM_031226805.1	2.01943	down
FPRO_01856	XM_031226829.1	2.32234	down
FPRO_01853	XM_031226862.1	2.42075	down
FPRO_01852	XM_031226873.1	2.0293	down
FPRO_01846	XM_031226940.1	1.60033	down
FPRO_01842	XM_031226984.1	1.9314	down
FPRO_01841	XM_031226995.1	1.92623	down
FPRO_01840	XM_031227006.1	1.71342	down
FPRO_01839	XM_031227017.1	1.51812	down
FPRO_01839	XM_031227017.1	1.83354	down
FPRO_01839	XM_031227017.1	1.65881	down
FPRO_01838	XM_031227028.1	1.62271	down
FPRO_01838	XM_031227028.1	1.72104	down
FPRO_01835	XM_031227062.1	1.5559	down
FPRO_01834	XM_031227073.1	1.75203	down
FPRO_01832	XM_031227095.1	1.78571	down
FPRO_01830	XM_031227117.1	1.50306	down
FPRO_01829	XM_031227128.1	2.12566	down
FPRO_01829	XM_031227128.1	1.72862	down
FPRO_01828	XM_031227139.1	1.76675	down
FPRO_01827	XM_031227151.1	1.6624	down
FPRO_01826	XM_031227162.1	2.27506	down
FPRO_01824	XM_031227184.1	1.94262	down
FPRO_01823	XM_031227195.1	1.62844	down
FPRO_01822	XM_031227206.1	2.01192	down
FPRO_01822	XM_031227206.1	1.82036	down
FPRO_01821	XM_031227217.1	2.33139	down
FPRO_01820	XM_031227228.1	1.35984	down
FPRO_01818	XM_031227250.1	2.2667	down
FPRO_01817	XM_031227262.1	2.48338	down
FPRO_01814	XM_031227295.1	1.6851	down
FPRO_01812	XM_031227317.1	1.70986	down
FPRO_01812	XM_031227317.1	1.86818	down
FPRO_01811	XM_031227328.1	1.68289	down
FPRO_01810	XM_031227339.1	1.45032	down
FPRO_01809	XM_031227350.1	1.6497	down
FPRO_01808	XM_031227361.1	1.5409	down
FPRO_01807	XM_031227373.1	1.62976	down
FPRO_01806	XM_031227384.1	2.01408	down
FPRO_01805	XM_031227395.1	1.57297	down
FPRO_01805	XM_031227395.1	1.60033	down
FPRO_01804	XM_031227406.1	1.40829	down
FPRO_01804	XM_031227406.1	1.91319	down
FPRO_01803	XM_031227417.1	1.64785	down
FPRO_01800	XM_031227450.1	1.54046	down
FPRO_01800	XM_031227450.1	1.65823	down
FPRO_01798	XM_031227472.1	2.08162	down
FPRO_01797	XM_031227484.1	1.48927	down
FPRO_01796	XM_031227495.1	1.65022	down
FPRO_01794	XM_031227517.1	1.83351	down
FPRO_01792	XM_031227539.1	1.84384	down
FPRO_01791	XM_031227550.1	1.66182	down
FPRO_01790	XM_031227561.1	1.5889	down
FPRO_01787	XM_031227595.1	1.60704	down
FPRO_01787	XM_031227595.1	1.79923	down
FPRO_01783	XM_031227639.1	1.61042	down
FPRO_01781	XM_031227661.1	2.32471	down
FPRO_01774	XM_031227739.1	1.99637	down
FPRO_01771	XM_031227772.1	1.80505	down
FPRO_01766	XM_031227828.1	1.78492	down
FPRO_01765	XM_031227839.1	1.86994	down
FPRO_01765	XM_031227839.1	1.61228	down
FPRO_01765	XM_031227839.1	1.68154	down
FPRO_01764	XM_031227850.1	1.5785	down
FPRO_01764	XM_031227850.1	1.50603	down
FPRO_01758	XM_031227916.1	1.82762	down
FPRO_01758	XM_031227916.1	1.97693	down
FPRO_01758	XM_031227916.1	1.55372	down
FPRO_01758	XM_031227916.1	1.55098	down
FPRO_01757	XM_031227929.1	1.75236	down
FPRO_01757	XM_031227929.1	1.79275	down
FPRO_01757	XM_031227929.1	1.39267	down
FPRO_01755	XM_031227951.1	1.43619	down
FPRO_01755	XM_031227951.1	1.83832	down
FPRO_01754	XM_031227962.1	1.85675	down
FPRO_01751	XM_031227995.1	1.80024	down
FPRO_01750	XM_031228006.1	1.51798	down
FPRO_01743	XM_031228084.1	1.82036	down
FPRO_01734	XM_031228184.1	1.41224	down
FPRO_01734	XM_031228184.1	1.58472	down
FPRO_01734	XM_031228184.1	1.60734	down
FPRO_01733	XM_031228195.1	2.35224	down
FPRO_01729	XM_031228239.1	1.48569	down
FPRO_01728	XM_031228250.1	1.42784	down
FPRO_01728	XM_031228250.1	1.83407	down
FPRO_01724	XM_031228295.1	1.56467	down
FPRO_01719	XM_031228350.1	1.47113	down
FPRO_01719	XM_031228350.1	1.50449	down
FPRO_01718	XM_031228361.1	1.66648	down
FPRO_01716	XM_031228384.1	2.02742	down
FPRO_01715	XM_031228395.1	1.54256	down
FPRO_01714	XM_031228406.1	1.72569	down
FPRO_01711	XM_031228439.1	1.69072	down
FPRO_01709	XM_031228461.1	1.89499	down
FPRO_01705	XM_031228506.1	1.68918	down
FPRO_01702	XM_031228539.1	1.59953	down
FPRO_01700	XM_031228561.1	1.72916	down
FPRO_01697	XM_031228595.1	1.9947	down
FPRO_01695	XM_031228617.1	1.85787	down
FPRO_01695	XM_031228617.1	1.55736	down
FPRO_01694	XM_031228628.1	1.65022	down
FPRO_01693	XM_031228639.1	1.71564	down
FPRO_01692	XM_031228650.1	1.77968	down
FPRO_01692	XM_031228650.1	1.89194	down
FPRO_01691	XM_031228661.1	1.8428	down
FPRO_01688	XM_031228694.1	1.62997	down
FPRO_01687	XM_031228706.1	1.93239	down
FPRO_01684	XM_031228739.1	1.46307	down
FPRO_01676	XM_031228828.1	1.61777	down
FPRO_01676	XM_031228828.1	2.12473	down
FPRO_01672	XM_031228872.1	1.44738	down
FPRO_01671	XM_031228883.1	1.76855	down
FPRO_01671	XM_031228883.1	1.75292	down
FPRO_01669	XM_031228905.1	1.64285	down
FPRO_01668	XM_031228916.1	1.552	down
FPRO_01663	XM_031228972.1	1.63698	down
FPRO_01662	XM_031228983.1	2.30992	down
FPRO_01659	XM_031229016.1	1.48733	down
FPRO_01656	XM_031229051.1	1.70311	down
FPRO_01655	XM_031229062.1	1.60376	down
FPRO_01653	XM_031229084.1	1.65792	down
FPRO_01653	XM_031229084.1	1.57967	down
FPRO_01653	XM_031229084.1	1.50603	down
FPRO_01649	XM_031229128.1	1.72046	down
FPRO_01648	XM_031229139.1	1.57596	down
FPRO_01648	XM_031229139.1	1.52557	down
FPRO_01645	XM_031229173.1	1.67547	down
FPRO_01643	XM_031229195.1	1.58496	down
FPRO_01643	XM_031229195.1	1.81878	down
FPRO_01641	XM_031229217.1	1.96489	down
FPRO_01635	XM_031229284.1	1.99609	down
FPRO_01634	XM_031229295.1	1.88574	down
FPRO_01631	XM_031229328.1	1.52557	down
FPRO_01628	XM_031229361.1	1.62988	down
FPRO_01625	XM_031229395.1	1.53369	down
FPRO_01622	XM_031229428.1	1.64307	down
FPRO_01615	XM_031229506.1	1.66595	down
FPRO_01607	XM_031229595.1	1.74635	down
FPRO_01606	XM_031229606.1	1.74608	down
FPRO_01606	XM_031229606.1	1.78495	down
FPRO_01602	XM_031229650.1	1.48429	down
FPRO_01601	XM_031229661.1	1.47404	down
FPRO_01591	XM_031229772.1	1.77239	down
FPRO_01590	XM_031229783.1	1.69421	down
FPRO_01589	XM_031229794.1	1.90642	down
FPRO_01588	XM_031229805.1	1.82063	down
FPRO_01585	XM_031229839.1	1.42452	down
FPRO_01584	XM_031229850.1	1.37292	down
FPRO_01583	XM_031229861.1	1.53194	down
FPRO_01583	XM_031229861.1	1.31653	down
FPRO_01582	XM_031229872.1	1.56467	down
FPRO_01582	XM_031229872.1	1.78571	down
FPRO_01575	XM_031229950.1	1.70072	down
FPRO_01572	XM_031229983.1	1.76706	down
FPRO_01567	XM_031230039.1	1.59449	down
FPRO_01565	XM_031230061.1	1.96108	down
FPRO_01561	XM_031230105.1	1.52328	down
FPRO_01561	XM_031230105.1	1.94262	down
FPRO_01560	XM_031230116.1	1.67581	down
FPRO_01557	XM_031230151.1	1.64394	down
FPRO_01550	XM_031230228.1	1.39447	down
FPRO_01544	XM_031230295.1	1.38202	down
FPRO_01539	XM_031230350.1	1.44996	down
FPRO_01539	XM_031230350.1	1.48569	down
FPRO_01537	XM_031230373.1	1.37419	down
FPRO_01532	XM_031230428.1	1.609	down
FPRO_01530	XM_031230450.1	1.47376	down
FPRO_01530	XM_031230450.1	1.83344	down
FPRO_01530	XM_031230450.1	2.01673	down
FPRO_01529	XM_031230461.1	1.97392	down
FPRO_01529	XM_031230461.1	1.5095	down
FPRO_01529	XM_031230461.1	1.87717	down
FPRO_01529	XM_031230461.1	1.93733	down
FPRO_01528	XM_031230472.1	1.70515	down
FPRO_01526	XM_031230495.1	1.48927	down
FPRO_01523	XM_031230528.1	1.39415	down
FPRO_01523	XM_031230528.1	1.88401	down
FPRO_01520	XM_031230561.1	1.82207	down
FPRO_01520	XM_031230561.1	1.34065	down
FPRO_01519	XM_031230572.1	1.3657	down
FPRO_01514	XM_031230628.1	1.46693	down
FPRO_01514	XM_031230628.1	1.41051	down
FPRO_01510	XM_031230672.1	1.55225	down
FPRO_01510	XM_031230672.1	1.54841	down
FPRO_01509	XM_031230683.1	1.79151	down
FPRO_01508	XM_031230694.1	2.38323	down
FPRO_01506	XM_031230717.1	1.69429	down
FPRO_01505	XM_031230728.1	1.52805	down
FPRO_01500	XM_031230783.1	1.53789	down
FPRO_01491	XM_031230883.1	1.42971	down
FPRO_01487	XM_031230928.1	1.72197	down
FPRO_01487	XM_031230928.1	1.48252	down
FPRO_01480	XM_031231005.1	1.39172	down
FPRO_01480	XM_031231005.1	1.62976	down
FPRO_01480	XM_031231005.1	1.61166	down
FPRO_01477	XM_031231039.1	1.90523	down
FPRO_01470	XM_031231116.1	1.58476	down
FPRO_01468	XM_031231138.1	1.5962	down
FPRO_01465	XM_031231172.1	1.48496	down
FPRO_01465	XM_031231172.1	1.92358	down
FPRO_01464	XM_031231183.1	1.65022	down
FPRO_01464	XM_031231183.1	1.52557	down
FPRO_01463	XM_031231194.1	1.61166	down
FPRO_01459	XM_031231238.1	1.40829	down
FPRO_01453	XM_031231306.1	1.68226	down
FPRO_01452	XM_031231317.1	1.50769	down
FPRO_01450	XM_031231339.1	1.91373	down
FPRO_01450	XM_031231339.1	1.53691	down
FPRO_01449	XM_031231350.1	1.54306	down
FPRO_01449	XM_031231350.1	1.67366	down
FPRO_01447	XM_031231373.1	2.08083	down
FPRO_01444	XM_031231406.1	1.5673	down
FPRO_01443	XM_031231417.1	1.52116	down
FPRO_01441	XM_031231439.1	1.48892	down
FPRO_01437	XM_031231484.1	2.06334	down
FPRO_01435	XM_031231506.1	1.83348	down
FPRO_01434	XM_031231517.1	1.74344	down
FPRO_01432	XM_031231539.1	1.74	down
FPRO_01431	XM_031231550.1	1.48648	down
FPRO_01425	XM_031231617.1	1.90094	down
FPRO_01425	XM_031231617.1	1.68918	down
FPRO_01424	XM_031231628.1	1.6432	down
FPRO_01424	XM_031231628.1	2.2667	down
FPRO_01422	XM_031231650.1	1.79048	down
FPRO_01419	XM_031231683.1	1.80696	down
FPRO_01418	XM_031231694.1	2.02989	down
FPRO_01411	XM_031231772.1	1.97458	down
FPRO_01411	XM_031231772.1	1.9113	down
FPRO_01408	XM_031231805.1	1.5063	down
FPRO_01405	XM_031231839.1	1.77469	down
FPRO_01401	XM_031231883.1	1.37957	down
FPRO_01397	XM_031231928.1	1.77994	down
FPRO_01394	XM_031231961.1	1.58704	down
FPRO_01385	XM_031232061.1	1.5076	down
FPRO_01381	XM_031232105.1	1.86688	down
FPRO_01381	XM_031232105.1	1.77032	down
FPRO_01376	XM_031232161.1	1.64356	down
FPRO_01376	XM_031232161.1	1.73242	down
FPRO_01375	XM_031232172.1	1.67948	down
FPRO_01375	XM_031232172.1	1.48826	down
FPRO_01367	XM_031232261.1	1.53664	down
FPRO_01367	XM_031232261.1	1.67854	down
FPRO_01366	XM_031232272.1	1.43875	down
FPRO_01360	XM_031232338.1	1.89919	down
FPRO_01357	XM_031232373.1	1.69689	down
FPRO_01352	XM_031232428.1	1.94517	down
FPRO_01351	XM_031232439.1	1.58621	down
FPRO_01351	XM_031232439.1	1.82401	down
FPRO_01350	XM_031232450.1	1.58914	down
FPRO_01350	XM_031232450.1	1.84971	down
FPRO_01349	XM_031232461.1	1.40162	down
FPRO_01345	XM_031232506.1	1.65754	down
FPRO_01338	XM_031232583.1	1.74471	down
FPRO_01337	XM_031232595.1	1.59709	down
FPRO_01333	XM_031232639.1	1.66243	down
FPRO_01326	XM_031232717.1	1.99316	down
FPRO_01322	XM_031232761.1	1.67364	down
FPRO_01316	XM_031232828.1	1.95551	down
FPRO_01316	XM_031232828.1	1.68943	down
FPRO_01315	XM_031232839.1	1.89497	down
FPRO_01313	XM_031232861.1	1.39172	down
FPRO_01309	XM_031232905.1	1.60997	down
FPRO_01308	XM_031232916.1	1.34456	down
FPRO_01306	XM_031232939.1	1.97601	down
FPRO_01304	XM_031232961.1	1.56452	down
FPRO_01304	XM_031232961.1	1.6624	down
FPRO_01302	XM_031232983.1	1.65195	down
FPRO_01301	XM_031232994.1	1.46681	down
FPRO_01300	XM_031233005.1	1.52557	down
FPRO_01294	XM_031233072.1	1.54841	down
FPRO_01294	XM_031233072.1	1.65018	down
FPRO_01293	XM_031233083.1	1.96657	down
FPRO_01289	XM_031233127.1	1.56723	down
FPRO_01288	XM_031233138.1	1.71318	down
FPRO_01288	XM_031233138.1	1.91492	down
FPRO_01287	XM_031233150.1	1.68083	down
FPRO_01284	XM_031233183.1	1.32296	down
FPRO_01271	XM_031233327.1	1.84945	down
FPRO_01268	XM_031233360.1	1.79569	down
FPRO_01267	XM_031233372.1	1.58914	down
FPRO_01266	XM_031233383.1	1.77012	down
FPRO_01264	XM_031233405.1	1.43067	down
FPRO_01257	XM_031233484.1	1.35827	down
FPRO_01256	XM_031233495.1	1.9539	down
FPRO_01256	XM_031233495.1	1.59157	down
FPRO_01250	XM_031233561.1	1.53075	down
FPRO_01250	XM_031233561.1	1.48733	down
FPRO_01249	XM_031233572.1	1.48733	down
FPRO_01249	XM_031233572.1	1.53325	down
FPRO_01243	XM_031233639.1	1.60883	down
FPRO_01233	XM_031233750.1	1.88597	down
FPRO_01228	XM_031233805.1	1.39962	down
FPRO_01225	XM_031233839.1	1.29335	down
FPRO_01217	XM_031233928.1	1.8282	down
FPRO_01209	XM_031234005.1	1.36212	down
FPRO_01207	XM_031234027.1	1.65259	down
FPRO_01195	XM_031234161.1	1.64413	down
FPRO_01194	XM_031234172.1	1.55921	down
FPRO_01194	XM_031234172.1	1.53075	down
FPRO_01193	XM_031234183.1	2.4036	down
FPRO_01177	XM_031234360.1	1.48496	down
FPRO_01161	XM_031234538.1	1.79813	down
FPRO_01158	XM_031234571.1	1.77803	down
FPRO_01157	XM_031234582.1	1.44484	down
FPRO_01147	XM_031218559.1	1.46681	down
FPRO_01145	XM_031218582.1	1.57812	down
FPRO_01141	XM_031218626.1	1.83894	down
FPRO_01134	XM_031218704.1	1.50603	down
FPRO_01132	XM_031218726.1	2.16815	down
FPRO_01129	XM_031218759.1	1.67958	down
FPRO_01123	XM_031218826.1	1.94206	down
FPRO_01123	XM_031218826.1	1.44738	down
FPRO_01121	XM_031218848.1	1.39447	down
FPRO_01120	XM_031218859.1	1.31515	down
FPRO_01120	XM_031218859.1	1.50306	down
FPRO_01119	XM_031218870.1	1.6255	down
FPRO_01119	XM_031218870.1	1.48733	down
FPRO_01115	XM_031218915.1	1.8596	down
FPRO_01114	XM_031218926.1	1.332	down
FPRO_01113	XM_031218937.1	1.76648	down
FPRO_01107	XM_031219003.1	1.68758	down
FPRO_01104	XM_031219037.1	1.47988	down
FPRO_01101	XM_031219070.1	1.53369	down
FPRO_01101	XM_031219070.1	1.38874	down
FPRO_01091	XM_031219181.1	1.65603	down
FPRO_01084	XM_031219259.1	1.66986	down
FPRO_01084	XM_031219259.1	1.68405	down
FPRO_01083	XM_031219270.1	1.67975	down
FPRO_01080	XM_031219303.1	1.54512	down
FPRO_01078	XM_031219325.1	1.59103	down
FPRO_01077	XM_031219336.1	1.5095	down
FPRO_01077	XM_031219336.1	1.46282	down
FPRO_01074	XM_031219370.1	1.76144	down
FPRO_01073	XM_031219381.1	1.86227	down
FPRO_01072	XM_031219392.1	2.09796	down
FPRO_01067	XM_031219447.1	2.00308	down
FPRO_01065	XM_031219470.1	1.65823	down
FPRO_01063	XM_031219492.1	1.6095	down
FPRO_01060	XM_031219525.1	1.56791	down
FPRO_01059	XM_031219536.1	2.22228	down
FPRO_01058	XM_031219547.1	2.18098	down
FPRO_01047	XM_031219670.1	1.60964	down
FPRO_01047	XM_031219670.1	1.37637	down
FPRO_01046	XM_031219682.1	1.42784	down
FPRO_01046	XM_031219682.1	1.60033	down
FPRO_01045	XM_031219693.1	1.60376	down
FPRO_01045	XM_031219693.1	1.72197	down
FPRO_01042	XM_031219726.1	1.66225	down
FPRO_01036	XM_031219793.1	1.70272	down
FPRO_01036	XM_031219793.1	1.65022	down
FPRO_01036	XM_031219793.1	1.75582	down
FPRO_01036	XM_031219793.1	1.83632	down
FPRO_01035	XM_031219804.1	1.34456	down
FPRO_01035	XM_031219804.1	1.69095	down
FPRO_01035	XM_031219804.1	1.59357	down
FPRO_01034	XM_031219815.1	1.29494	down
FPRO_01030	XM_031219859.1	1.44938	down
FPRO_01025	XM_031219915.1	2.29356	down
FPRO_01023	XM_031219937.1	1.82377	down
FPRO_01022	XM_031219948.1	1.4333	down
FPRO_01016	XM_031220015.1	1.72337	down
FPRO_01015	XM_031220026.1	1.53075	down
FPRO_01012	XM_031220059.1	2.15197	down
FPRO_01009	XM_031220092.1	1.3448	down
FPRO_01002	XM_031220170.1	1.58914	down
FPRO_01001	XM_031220181.1	1.39447	down
FPRO_01000	XM_031220192.1	1.60376	down
FPRO_00998	XM_031220214.1	1.59709	down
FPRO_00990	XM_031220303.1	1.69597	down
FPRO_00989	XM_031220314.1	1.44897	down
FPRO_00984	XM_031220370.1	1.70674	down
FPRO_00981	XM_031220403.1	1.65809	down
FPRO_00981	XM_031220403.1	1.46701	down
FPRO_00980	XM_031220414.1	1.89269	down
FPRO_00976	XM_031220459.1	1.3692	down
FPRO_00973	XM_031220492.1	1.74322	down
FPRO_00971	XM_031220514.1	1.77407	down
FPRO_00967	XM_031220558.1	1.48429	down
FPRO_00963	XM_031220603.1	1.48733	down
FPRO_00961	XM_031220625.1	1.54512	down
FPRO_00959	XM_031220647.1	1.86942	down
FPRO_00957	XM_031220669.1	1.38874	down
FPRO_00957	XM_031220669.1	1.61607	down
FPRO_00941	XM_031220848.1	1.6388	down
FPRO_00937	XM_031220892.1	1.62986	down
FPRO_00936	XM_031220904.1	1.52557	down
FPRO_00936	XM_031220904.1	2.37064	down
FPRO_00923	XM_031221048.1	1.84925	down
FPRO_00918	XM_031221103.1	1.50182	down
FPRO_00914	XM_031221148.1	2.02237	down
FPRO_00909	XM_031221203.1	1.7015	down
FPRO_00907	XM_031221225.1	2.06248	down
FPRO_00907	XM_031221225.1	1.59356	down
FPRO_00907	XM_031221225.1	1.57546	down
FPRO_00907	XM_031221225.1	1.99174	down
FPRO_00907	XM_031221225.1	1.85411	down
FPRO_00907	XM_031221225.1	1.99429	down
FPRO_00906	XM_031221237.1	1.60491	down
FPRO_00906	XM_031221237.1	1.41051	down
FPRO_00906	XM_031221237.1	1.52557	down
FPRO_00906	XM_031221237.1	1.43193	down
FPRO_00906	XM_031221237.1	1.76223	down
FPRO_00899	XM_031221314.1	1.73977	down
FPRO_00897	XM_031221336.1	1.45676	down
FPRO_00895	XM_031221359.1	1.94651	down
FPRO_00893	XM_031221381.1	1.55169	down
FPRO_00891	XM_031221403.1	1.67654	down
FPRO_00888	XM_031221436.1	1.39729	down
FPRO_00884	XM_031221481.1	1.51148	down
FPRO_00883	XM_031221492.1	1.49383	down
FPRO_00880	XM_031221525.1	1.88219	down
FPRO_00880	XM_031221525.1	1.50051	down
FPRO_00880	XM_031221525.1	1.77794	down
FPRO_00880	XM_031221525.1	1.35413	down
FPRO_00879	XM_031221536.1	1.77299	down
FPRO_00878	XM_031221547.1	1.78601	down
FPRO_00874	XM_031221592.1	1.58526	down
FPRO_00874	XM_031221592.1	1.96444	down
FPRO_00870	XM_031221636.1	1.6912	down
FPRO_00862	XM_031221725.1	1.61374	down
FPRO_00861	XM_031221736.1	1.81878	down
FPRO_18015	unassigned_transcript_279	1.38533	down
FPRO_00848	XM_031221881.1	1.86137	down
FPRO_00845	XM_031221915.1	1.43067	down
FPRO_00844	XM_031221926.1	1.8697	down
FPRO_00842	XM_031221948.1	2.33662	down
FPRO_00841	XM_031221959.1	1.54994	down
FPRO_00834	XM_031222037.1	1.42931	down
FPRO_00833	XM_031222048.1	1.46681	down
FPRO_00833	XM_031222048.1	1.42625	down
FPRO_00831	XM_031222070.1	1.52557	down
FPRO_00827	XM_031222103.1	1.50769	down
FPRO_00826	XM_031222114.1	1.3301	down
FPRO_00825	XM_031222126.1	1.44877	down
FPRO_00810	XM_031222292.1	1.833	down
FPRO_00810	XM_031222292.1	1.70265	down
FPRO_00808	XM_031222314.1	1.53369	down
FPRO_00807	XM_031222325.1	1.81616	down
FPRO_00803	XM_031222370.1	1.34467	down
FPRO_00798	XM_031222425.1	1.86466	down
FPRO_00795	XM_031222459.1	1.92543	down
FPRO_00793	XM_031222481.1	1.67335	down
FPRO_00792	XM_031222492.1	1.70843	down
FPRO_00792	XM_031222492.1	1.81361	down
FPRO_00792	XM_031222492.1	1.72197	down
FPRO_00791	XM_031222503.1	1.42784	down
FPRO_00790	XM_031222514.1	2.26714	down
FPRO_00787	XM_031222547.1	1.78338	down
FPRO_00787	XM_031222547.1	1.82401	down
FPRO_00786	XM_031222558.1	1.40565	down
FPRO_00778	XM_031222647.1	1.70984	down
FPRO_00776	XM_031222669.1	1.59699	down
FPRO_00776	XM_031222669.1	1.42328	down
FPRO_00766	XM_031222780.1	1.77138	down
FPRO_00765	XM_031222792.1	1.51919	down
FPRO_00764	XM_031222803.1	1.41791	down
FPRO_00758	XM_031222869.1	1.83832	down
FPRO_00756	XM_031222891.1	1.75446	down
FPRO_00756	XM_031222891.1	1.51755	down
FPRO_00756	XM_031222891.1	1.76446	down
FPRO_00756	XM_031222891.1	2.12474	down
FPRO_00755	XM_031222904.1	1.57812	down
FPRO_00755	XM_031222904.1	1.66409	down
FPRO_00755	XM_031222904.1	1.45099	down
FPRO_00753	XM_031222926.1	1.81101	down
FPRO_00750	XM_031222959.1	1.75774	down
FPRO_00745	XM_031223015.1	1.70328	down
FPRO_00745	XM_031223015.1	1.68083	down
FPRO_00738	XM_031223092.1	1.65485	down
FPRO_00738	XM_031223092.1	1.6624	down
FPRO_00738	XM_031223092.1	1.88353	down
FPRO_00737	XM_031223103.1	2.10441	down
FPRO_00737	XM_031223103.1	1.40588	down
FPRO_00737	XM_031223103.1	1.78641	down
FPRO_00736	XM_031223114.1	1.61205	down
FPRO_00733	XM_031223148.1	1.97743	down
FPRO_00732	XM_031223159.1	1.74472	down
FPRO_00732	XM_031223159.1	1.56616	down
FPRO_00722	XM_031223270.1	1.67364	down
FPRO_00715	XM_031223348.1	1.75203	down
FPRO_00714	XM_031223359.1	1.68745	down
FPRO_00713	XM_031223370.1	1.6432	down
FPRO_00713	XM_031223370.1	1.83348	down
FPRO_00709	XM_031223414.1	1.6947	down
FPRO_00701	XM_031223503.1	1.64394	down
FPRO_00694	XM_031223581.1	1.67396	down
FPRO_00687	XM_031223658.1	1.74628	down
FPRO_00685	XM_031223681.1	1.5926	down
FPRO_00678	XM_031223758.1	1.56878	down
FPRO_00678	XM_031223758.1	1.50769	down
FPRO_00672	XM_031223825.1	1.77239	down
FPRO_00671	XM_031223836.1	1.49936	down
FPRO_00670	XM_031223847.1	1.37292	down
FPRO_00666	XM_031223891.1	1.58914	down
FPRO_00661	XM_031223947.1	2.40654	down
FPRO_00655	XM_031224015.1	1.50998	down
FPRO_00653	XM_031224037.1	1.66225	down
FPRO_00649	XM_031224081.1	1.53051	down
FPRO_18016	unassigned_transcript_280	1.58619	down
FPRO_00648	XM_031224092.1	1.57324	down
FPRO_00643	XM_031224148.1	1.52116	down
FPRO_00641	XM_031224170.1	1.62986	down
FPRO_00641	XM_031224170.1	1.8154	down
FPRO_00639	XM_031224192.1	1.80521	down
FPRO_00639	XM_031224192.1	1.57967	down
FPRO_00636	XM_031224214.1	1.59846	down
FPRO_00631	XM_031224270.1	1.38552	down
FPRO_00630	XM_031224281.1	1.59953	down
FPRO_00630	XM_031224281.1	1.59888	down
FPRO_00628	XM_031224303.1	1.37728	down
FPRO_00628	XM_031224303.1	1.65195	down
FPRO_00626	XM_031224325.1	2.06248	down
FPRO_00623	XM_031224359.1	1.84211	down
FPRO_00622	XM_031224370.1	1.92997	down
FPRO_00622	XM_031224370.1	1.44661	down
FPRO_00619	XM_031224403.1	1.32721	down
FPRO_00617	XM_031224425.1	1.62535	down
FPRO_00614	XM_031224459.1	1.4669	down
FPRO_00613	XM_031224470.1	1.44576	down
FPRO_00612	XM_031224481.1	1.60359	down
FPRO_00608	XM_031224525.1	1.74925	down
FPRO_00603	XM_031224581.1	1.88057	down
FPRO_00602	XM_031224592.1	1.82245	down
FPRO_00601	XM_031224603.1	1.81585	down
FPRO_00601	XM_031224603.1	1.61698	down
FPRO_00601	XM_031224603.1	1.65823	down
FPRO_00601	XM_031224603.1	1.854	down
FPRO_00600	XM_031224614.1	2.26405	down
FPRO_00600	XM_031224614.1	1.56241	down
FPRO_00597	XM_031224647.1	1.63	down
FPRO_00586	XM_031224769.1	1.54418	down
FPRO_00583	XM_031224803.1	1.71123	down
FPRO_00580	XM_031224836.1	1.70072	down
FPRO_00571	XM_031224936.1	1.40829	down
FPRO_00571	XM_031224936.1	1.31515	down
FPRO_00570	XM_031224947.1	1.38874	down
FPRO_00570	XM_031224947.1	1.54427	down
FPRO_00558	XM_031225080.1	1.64744	down
FPRO_00557	XM_031225091.1	2.12946	down
FPRO_00555	XM_031225113.1	1.60249	down
FPRO_00551	XM_031225159.1	1.67058	down
FPRO_00548	XM_031225192.1	1.58261	down
FPRO_00547	XM_031225203.1	1.45845	down
FPRO_00542	XM_031225259.1	1.63151	down
FPRO_18021	unassigned_transcript_285	1.80024	down
FPRO_00534	XM_031225285.1	1.52557	down
FPRO_00533	XM_031225286.1	1.55225	down
FPRO_00528	XM_031225291.1	1.35413	down
FPRO_00520	XM_031225300.1	1.35827	down
FPRO_00515	XM_031225305.1	1.50537	down
FPRO_00514	XM_031225307.1	1.95557	down
FPRO_00513	XM_031225308.1	1.44738	down
FPRO_00511	XM_031225310.1	1.59433	down
FPRO_00510	XM_031225311.1	1.35984	down
FPRO_00498	XM_031225324.1	1.76446	down
FPRO_00494	XM_031225329.1	1.44877	down
FPRO_00493	XM_031225330.1	1.53707	down
FPRO_00492	XM_031225331.1	1.46686	down
FPRO_00491	XM_031225332.1	1.64748	down
FPRO_00491	XM_031225332.1	1.33361	down
FPRO_00490	XM_031225333.1	1.79275	down
FPRO_00490	XM_031225333.1	1.38255	down
FPRO_00489	XM_031225334.1	2.08575	down
FPRO_00488	XM_031225335.1	1.55736	down
FPRO_00488	XM_031225335.1	1.50449	down
FPRO_00487	XM_031225336.1	1.57546	down
FPRO_00487	XM_031225336.1	1.5541	down
FPRO_00477	XM_031225347.1	2.50375	down
FPRO_00477	XM_031225347.1	2.037	down
FPRO_00477	XM_031225347.1	1.59915	down
FPRO_00474	XM_031225351.1	1.70958	down
FPRO_00469	XM_031225356.1	1.48059	down
FPRO_00459	XM_031225367.1	1.44938	down
FPRO_00456	XM_031225370.1	2.33813	down
FPRO_00454	XM_031225374.1	1.7015	down
FPRO_00449	XM_031225379.1	1.70272	down
FPRO_00439	XM_031225390.1	1.51148	down
FPRO_00438	XM_031225391.1	2.44436	down
FPRO_00438	XM_031225391.1	1.52557	down
FPRO_00437	XM_031225392.1	1.30912	down
FPRO_18022	unassigned_transcript_286	1.99637	down
FPRO_00432	XM_031225398.1	1.64433	down
FPRO_00431	XM_031225399.1	1.66492	down
FPRO_00419	XM_031225412.1	1.50603	down
FPRO_00418	XM_031225413.1	1.88909	down
FPRO_00417	XM_031225414.1	1.56878	down
FPRO_00414	XM_031225418.1	1.70328	down
FPRO_00414	XM_031225418.1	1.58196	down
FPRO_00414	XM_031225418.1	1.51544	down
FPRO_00409	XM_031225423.1	1.44938	down
FPRO_00406	XM_031225426.1	1.50449	down
FPRO_00405	XM_031225427.1	1.68897	down
FPRO_00402	XM_031225431.1	1.58734	down
FPRO_00401	XM_031225432.1	1.62986	down
FPRO_00401	XM_031225432.1	1.53911	down
FPRO_00399	XM_031225434.1	1.53369	down
FPRO_00396	XM_031225437.1	1.65485	down
FPRO_00395	XM_031225438.1	1.53286	down
FPRO_00389	XM_031225445.1	1.87882	down
FPRO_00388	XM_031225446.1	1.66803	down
FPRO_00384	XM_031225451.1	1.75519	down
FPRO_00380	XM_031225455.1	1.8	down
FPRO_00379	XM_031225456.1	1.95967	down
FPRO_00379	XM_031225456.1	1.332	down
FPRO_00377	XM_031225458.1	1.65823	down
FPRO_00367	XM_031225469.1	1.43067	down
FPRO_00366	XM_031225470.1	1.57383	down
FPRO_00364	XM_031225473.1	1.8562	down
FPRO_00359	XM_031225478.1	1.4481	down
FPRO_00358	XM_031225479.1	1.41051	down
FPRO_00356	XM_031225481.1	1.71112	down
FPRO_00354	XM_031225485.1	1.62227	down
FPRO_00352	XM_031225487.1	1.97437	down
FPRO_00351	XM_031225488.1	1.38874	down
FPRO_00346	XM_031225493.1	1.56561	down
FPRO_00344	XM_031225496.1	1.75335	down
FPRO_00343	XM_031225497.1	1.84783	down
FPRO_00340	XM_031225500.1	1.58476	down
FPRO_00339	XM_031225501.1	1.46678	down
FPRO_00339	XM_031225501.1	1.86389	down
FPRO_00336	XM_031225504.1	1.33533	down
FPRO_00336	XM_031225504.1	1.60215	down
FPRO_00332	XM_031225509.1	1.84384	down
FPRO_00332	XM_031225509.1	1.48429	down
FPRO_00328	XM_031225513.1	1.40895	down
FPRO_00327	XM_031225514.1	2.42311	down
FPRO_00325	XM_031225516.1	1.92562	down
FPRO_00325	XM_031225516.1	1.88996	down
FPRO_00324	XM_031225518.1	1.76446	down
FPRO_00323	XM_031225519.1	1.46686	down
FPRO_18027	unassigned_transcript_291	1.73606	down
FPRO_00322	XM_031225520.1	1.70129	down
FPRO_00322	XM_031225520.1	1.45049	down
FPRO_00322	XM_031225520.1	1.63	down
FPRO_00322	XM_031225520.1	1.60733	down
FPRO_00321	XM_031225521.1	1.67058	down
FPRO_00321	XM_031225521.1	1.69455	down
FPRO_00321	XM_031225521.1	1.77597	down
FPRO_00319	XM_031225523.1	1.57546	down
FPRO_00319	XM_031225523.1	1.82805	down
FPRO_00318	XM_031225524.1	1.53369	down
FPRO_00318	XM_031225524.1	2.02583	down
FPRO_00311	XM_031225532.1	1.58914	down
FPRO_00311	XM_031225532.1	1.73083	down
FPRO_00311	XM_031225532.1	1.56209	down
FPRO_00310	XM_031225533.1	1.52149	down
FPRO_00309	XM_031225534.1	1.609	down
FPRO_00309	XM_031225534.1	2.15031	down
FPRO_00307	XM_031225536.1	1.95757	down
FPRO_00307	XM_031225536.1	1.9113	down
FPRO_00307	XM_031225536.1	1.44661	down
FPRO_00306	XM_031225537.1	1.51346	down
FPRO_00306	XM_031225537.1	1.65823	down
FPRO_00306	XM_031225537.1	1.75956	down
FPRO_00305	XM_031225538.1	1.95573	down
FPRO_00304	XM_031225540.1	2.26004	down
FPRO_00303	XM_031225541.1	1.656	down
FPRO_00303	XM_031225541.1	1.62197	down
FPRO_00300	XM_031225544.1	1.44955	down
FPRO_00300	XM_031225544.1	1.78601	down
FPRO_18029	unassigned_transcript_293	2.17785	down
FPRO_00299	XM_031225545.1	1.42931	down
FPRO_00299	XM_031225545.1	1.44193	down
FPRO_00297	XM_031225547.1	1.68918	down
FPRO_00297	XM_031225547.1	1.60673	down
FPRO_00296	XM_031225548.1	2.12988	down
FPRO_00295	XM_031225549.1	1.5095	down
FPRO_00295	XM_031225549.1	1.89697	down
FPRO_00293	XM_031225552.1	2.08132	down
FPRO_00292	XM_031225553.1	1.81551	down
FPRO_00292	XM_031225553.1	1.53369	down
FPRO_00291	XM_031225554.1	1.85844	down
FPRO_00291	XM_031225554.1	1.37637	down
FPRO_00290	XM_031225555.1	1.67948	down
FPRO_00288	XM_031225557.1	1.64111	down
FPRO_00288	XM_031225557.1	1.44484	down
FPRO_00288	XM_031225557.1	1.62997	down
FPRO_00287	XM_031225558.1	1.65823	down
FPRO_00287	XM_031225558.1	1.69095	down
FPRO_00284	XM_031225562.1	1.70072	down
FPRO_00283	XM_031225563.1	1.4333	down
FPRO_00282	XM_031225564.1	1.76238	down
FPRO_00281	XM_031225565.1	1.6747	down
FPRO_00279	XM_031225567.1	1.30912	down
FPRO_00271	XM_031225576.1	1.67278	down
FPRO_00271	XM_031225576.1	2.57546	down
FPRO_00270	XM_031225577.1	1.72197	down
FPRO_00268	XM_031225579.1	1.94795	down
FPRO_00266	XM_031225581.1	1.5095	down
FPRO_00263	XM_031225585.1	1.61501	down
FPRO_00263	XM_031225585.1	1.90145	down
FPRO_00262	XM_031225586.1	2.14783	down
FPRO_00262	XM_031225586.1	1.65823	down
FPRO_00261	XM_031225587.1	1.97208	down
FPRO_00260	XM_031225588.1	1.83917	down
FPRO_00258	XM_031225590.1	1.64016	down
FPRO_00258	XM_031225590.1	1.54512	down
FPRO_00255	XM_031225593.1	1.67246	down
FPRO_00254	XM_031225596.1	1.34065	down
FPRO_00254	XM_031225596.1	1.69817	down
FPRO_00253	XM_031225597.1	1.71488	down
FPRO_00253	XM_031225597.1	1.69817	down
FPRO_00252	XM_031225598.1	1.55927	down
FPRO_00251	XM_031225599.1	1.76446	down
FPRO_00251	XM_031225599.1	1.52274	down
FPRO_00250	XM_031225600.1	1.77564	down
FPRO_00249	XM_031225601.1	1.43823	down
FPRO_00244	XM_031225607.1	1.552	down
FPRO_00243	XM_031225608.1	1.67948	down
FPRO_00242	XM_031225609.1	1.64346	down
FPRO_00241	XM_031225610.1	1.93444	down
FPRO_00241	XM_031225610.1	1.3878	down
FPRO_00240	XM_031225611.1	1.7848	down
FPRO_00240	XM_031225611.1	1.77063	down
FPRO_00238	XM_031225613.1	1.50174	down
FPRO_00237	XM_031225614.1	1.78098	down
FPRO_00228	XM_031225624.1	2.09776	down
FPRO_00226	XM_031225626.1	1.73064	down
FPRO_00223	XM_031225630.1	1.54841	down
FPRO_00214	XM_031225640.1	2.32511	down
FPRO_00214	XM_031225640.1	1.77239	down
FPRO_00212	XM_031225642.1	1.68405	down
FPRO_00211	XM_031225643.1	1.66162	down
FPRO_00207	XM_031225647.1	2.0047	down
FPRO_00206	XM_031225648.1	1.75939	down
FPRO_00203	XM_031225652.1	1.67948	down
FPRO_00202	XM_031225653.1	1.43067	down
FPRO_00195	XM_031225660.1	1.78728	down
FPRO_00194	XM_031225662.1	1.64785	down
FPRO_00194	XM_031225662.1	2.21608	down
FPRO_00194	XM_031225662.1	2.04067	down
FPRO_00193	XM_031225663.1	1.69372	down
FPRO_00192	XM_031225664.1	1.41257	down
FPRO_00192	XM_031225664.1	1.67697	down
FPRO_00192	XM_031225664.1	1.52566	down
FPRO_00192	XM_031225664.1	1.60764	down
FPRO_00191	XM_031225665.1	2.17588	down
FPRO_00191	XM_031225665.1	1.82149	down
FPRO_00190	XM_031225666.1	1.97601	down
FPRO_00189	XM_031225667.1	1.94705	down
FPRO_00188	XM_031225668.1	2.18334	down
FPRO_00187	XM_031225669.1	1.80885	down
FPRO_00186	XM_031225670.1	1.55027	down
FPRO_00184	XM_031225673.1	1.58243	down
FPRO_00184	XM_031225673.1	1.71139	down
FPRO_00184	XM_031225673.1	1.57741	down
FPRO_00183	XM_031225674.1	1.68918	down
FPRO_00183	XM_031225674.1	1.48648	down
FPRO_00182	XM_031225675.1	1.66322	down
FPRO_00181	XM_031225676.1	1.47988	down
FPRO_00180	XM_031225677.1	1.44484	down
FPRO_00178	XM_031225679.1	1.62986	down
FPRO_00177	XM_031225680.1	1.3994	down
FPRO_00174	XM_031225684.1	1.70364	down
FPRO_00173	XM_031225685.1	2.22034	down
FPRO_00172	XM_031225686.1	2.94806	down
FPRO_00170	XM_031225688.1	1.73462	down
FPRO_00169	XM_031225689.1	1.42784	down
FPRO_00168	XM_031225690.1	1.92543	down
FPRO_00167	XM_031225691.1	1.85871	down
FPRO_00166	XM_031225692.1	1.93444	down
FPRO_00165	XM_031225693.1	1.62986	down
FPRO_00163	XM_031225696.1	1.78098	down
FPRO_00162	XM_031225697.1	1.44661	down
FPRO_00160	XM_031225699.1	1.56723	down
FPRO_00158	XM_031225701.1	2.06834	down
FPRO_00157	XM_031225702.1	1.95564	down
FPRO_00157	XM_031225702.1	1.99316	down
FPRO_00157	XM_031225702.1	1.53926	down
FPRO_00156	XM_031225703.1	2.23699	down
FPRO_00155	XM_031225704.1	2.18603	down
FPRO_00155	XM_031225704.1	1.66165	down
FPRO_00152	XM_031225710.1	2.01196	down
FPRO_00152	XM_031225710.1	1.97693	down
FPRO_00152	XM_031225710.1	1.65134	down
FPRO_00152	XM_031225710.1	1.71131	down
FPRO_00151	XM_031225711.1	2.08575	down
FPRO_00150	XM_031225712.1	1.85844	down
FPRO_00149	XM_031225713.1	2.42802	down
FPRO_00149	XM_031225713.1	1.44738	down
FPRO_00148	XM_031225714.1	2.16254	down
FPRO_00146	XM_031225716.1	1.88909	down
FPRO_00146	XM_031225716.1	1.96444	down
FPRO_00145	XM_031225717.1	1.43067	down
FPRO_00144	XM_031225719.1	2.0168	down
FPRO_00143	XM_031225720.1	2.16078	down
FPRO_00142	XM_031225721.1	1.53267	down
FPRO_00141	XM_031225722.1	2.30483	down
FPRO_00141	XM_031225722.1	1.82245	down
FPRO_00138	XM_031225725.1	2.1513	down
FPRO_00137	XM_031225726.1	1.52557	down
FPRO_00135	XM_031225728.1	1.99818	down
FPRO_00134	XM_031225730.1	2.49099	down
FPRO_00133	XM_031225731.1	1.552	down
FPRO_00129	XM_031225735.1	1.8627	down
FPRO_00127	XM_031225737.1	1.62254	down
FPRO_00126	XM_031225738.1	2.07563	down
FPRO_00123	XM_031225742.1	2.00703	down
FPRO_00122	XM_031225743.1	1.60646	down
FPRO_00121	XM_031225744.1	2.45865	down
FPRO_00120	XM_031225745.1	1.76446	down
FPRO_00119	XM_031225746.1	1.64596	down
FPRO_00119	XM_031225746.1	1.74925	down
FPRO_00118	XM_031225747.1	2.44435	down
FPRO_00112	XM_031225754.1	2.19017	down
FPRO_00111	XM_031225755.1	2.11843	down
FPRO_00111	XM_031225755.1	2.22623	down
FPRO_00110	XM_031225756.1	1.98879	down
FPRO_00109	XM_031225757.1	1.54823	down
FPRO_00108	XM_031225758.1	1.99174	down
FPRO_00106	XM_031225760.1	1.75938	down
FPRO_00105	XM_031225761.1	2.16254	down
FPRO_00105	XM_031225761.1	2.02913	down
FPRO_00104	XM_031225763.1	1.73462	down
FPRO_00103	XM_031225764.1	1.51988	down
FPRO_00101	XM_031225766.1	2.13085	down
FPRO_00100	XM_031225767.1	2.08162	down
FPRO_00099	XM_031225768.1	1.93744	down
FPRO_00098	XM_031225769.1	1.4342	down
FPRO_00098	XM_031225769.1	2.48314	down
FPRO_00097	XM_031225770.1	1.75292	down
FPRO_00097	XM_031225770.1	2.17399	down
FPRO_00093	XM_031225775.1	1.8707	down
FPRO_00092	XM_031225776.1	1.8857	down
FPRO_00091	XM_031225777.1	2.22034	down
FPRO_00090	XM_031225778.1	1.94262	down
FPRO_00089	XM_031225779.1	2.0334	down
FPRO_00088	XM_031225780.1	1.62331	down
FPRO_00087	XM_031225781.1	1.78571	down
FPRO_00086	XM_031225782.1	1.57546	down
FPRO_00085	XM_031225783.1	1.97601	down
FPRO_00082	XM_031225787.1	1.46701	down
FPRO_00080	XM_031225789.1	1.43709	down
FPRO_00079	XM_031225790.1	1.85787	down
FPRO_00078	XM_031225791.1	1.46693	down
FPRO_00077	XM_031225792.1	2.12566	down
FPRO_00076	XM_031225793.1	1.46701	down
FPRO_00075	XM_031225794.1	1.56878	down
FPRO_00074	XM_031225796.1	1.69716	down
FPRO_00073	XM_031225797.1	1.3994	down
FPRO_00071	XM_031225799.1	2.47754	down
FPRO_00070	XM_031225800.1	1.41257	down
FPRO_00067	XM_031225803.1	1.75203	down
FPRO_00066	XM_031225804.1	1.50306	down
FPRO_00065	XM_031225805.1	1.93251	down
FPRO_00062	XM_031225809.1	1.63557	down
FPRO_00061	XM_031225810.1	1.78641	down
FPRO_00060	XM_031225811.1	1.93274	down
FPRO_00060	XM_031225811.1	2.14478	down
FPRO_00059	XM_031225812.1	2.40187	down
FPRO_00057	XM_031225814.1	2.44447	down
FPRO_00056	XM_031225815.1	1.99473	down
FPRO_00054	XM_031225819.1	1.99316	down
FPRO_00054	XM_031225819.1	1.88219	down
FPRO_00053	XM_031225820.1	2.2074	down
FPRO_00050	XM_031225823.1	1.79289	down
FPRO_00049	XM_031225824.1	1.92081	down
FPRO_00049	XM_031225824.1	1.93444	down
FPRO_00048	XM_031225825.1	1.88909	down
FPRO_00047	XM_031225826.1	2.19083	down
FPRO_00046	XM_031225827.1	1.53691	down
FPRO_00045	XM_031225828.1	2.05334	down
FPRO_00044	XM_031225830.1	2.04507	down
FPRO_00043	XM_031225831.1	1.79289	down
FPRO_00041	XM_031225833.1	2.08932	down
FPRO_00040	XM_031225834.1	1.9113	down
FPRO_00039	XM_031225835.1	1.73242	down
FPRO_00038	XM_031225836.1	1.64785	down
FPRO_00037	XM_031225837.1	1.48648	down
FPRO_00037	XM_031225837.1	2.09817	down
FPRO_00036	XM_031225838.1	2.09817	down
FPRO_00035	XM_031225839.1	2.29691	down
FPRO_00034	XM_031225841.1	1.93606	down
FPRO_00034	XM_031225841.1	1.66225	down
FPRO_00033	XM_031225842.1	2.77024	down
FPRO_00033	XM_031225842.1	1.63792	down
FPRO_00032	XM_031225843.1	2.3042	down
FPRO_00031	XM_031225844.1	1.37637	down
FPRO_00029	XM_031225846.1	1.34885	down
FPRO_00028	XM_031225847.1	1.47631	down
FPRO_00027	XM_031225848.1	1.99818	down
FPRO_00026	XM_031225849.1	2.12566	down
FPRO_00025	XM_031225850.1	1.52805	down
FPRO_00025	XM_031225850.1	1.89697	down
FPRO_00023	XM_031225853.1	1.61166	down
FPRO_00023	XM_031225853.1	1.56878	down
FPRO_00022	XM_031225854.1	1.86252	down
FPRO_00020	XM_031225856.1	2.51253	down
FPRO_00018	XM_031225858.1	1.62331	down
FPRO_00018	XM_031225858.1	1.4481	down
FPRO_00017	XM_031225859.1	1.92781	down
FPRO_00016	XM_031225860.1	1.97208	down
FPRO_00015	XM_031225861.1	2.0699	down
FPRO_00014	XM_031225863.1	2.15463	down
FPRO_00014	XM_031225863.1	1.75327	down
FPRO_03822	XM_031225923.1	1.43193	down
FPRO_03822	XM_031225923.1	2.52707	down
FPRO_03821	XM_031225924.1	1.79265	down
FPRO_03820	XM_031225925.1	1.93352	down
FPRO_03820	XM_031225925.1	1.85711	down
FPRO_03819	XM_031225926.1	1.59846	down
FPRO_03819	XM_031225926.1	1.93606	down
FPRO_03818	XM_031225927.1	2.51458	down
FPRO_03816	XM_031225931.1	2.61651	down
FPRO_03814	XM_031225933.1	1.35984	down
FPRO_03813	XM_031225934.1	1.96329	down
FPRO_03812	XM_031225935.1	1.9947	down
FPRO_03810	XM_031225937.1	1.80024	down
FPRO_03807	XM_031225941.1	1.88039	down
FPRO_03806	XM_031225942.1	1.90137	down
FPRO_03804	XM_031225944.1	1.97693	down
FPRO_03801	XM_031225947.1	1.86567	down
FPRO_03800	XM_031225948.1	2.22025	down
FPRO_03799	XM_031225949.1	1.50769	down
FPRO_03798	XM_031225950.1	2.15703	down
FPRO_03796	XM_031225953.1	2.00984	down
FPRO_03795	XM_031225954.1	1.73835	down
FPRO_03795	XM_031225954.1	2.27439	down
FPRO_03794	XM_031225955.1	1.99506	down
FPRO_03793	XM_031225956.1	2.24081	down
FPRO_03792	XM_031225957.1	1.99609	down
FPRO_03790	XM_031225959.1	1.57546	down
FPRO_03790	XM_031225959.1	1.78402	down
FPRO_03789	XM_031225960.1	1.90661	down
FPRO_03789	XM_031225960.1	1.36905	down
FPRO_03788	XM_031225961.1	2.05656	down
FPRO_03786	XM_031225964.1	2.15419	down
FPRO_03785	XM_031225965.1	2.05316	down
FPRO_03784	XM_031225966.1	1.54512	down
FPRO_03783	XM_031225967.1	1.5541	down
FPRO_03783	XM_031225967.1	2.24804	down
FPRO_03783	XM_031225967.1	1.8355	down
FPRO_03782	XM_031225968.1	1.6989	down
FPRO_03781	XM_031225969.1	2.51166	down
FPRO_03779	XM_031225971.1	1.73003	down
FPRO_03778	XM_031225972.1	1.44661	down
FPRO_03777	XM_031225974.1	2.05975	down
FPRO_03776	XM_031225975.1	1.60607	down
FPRO_03775	XM_031225976.1	1.90124	down
FPRO_03774	XM_031225977.1	1.8428	down
FPRO_03773	XM_031225978.1	1.66263	down
FPRO_03773	XM_031225978.1	2.30614	down
FPRO_03772	XM_031225979.1	1.93678	down
FPRO_03771	XM_031225980.1	1.83344	down
FPRO_03770	XM_031225981.1	2.53325	down
FPRO_03770	XM_031225981.1	2.10593	down
FPRO_03769	XM_031225982.1	1.49828	down
FPRO_03768	XM_031225983.1	1.98343	down
FPRO_03767	XM_031225985.1	1.74622	down
FPRO_03766	XM_031225986.1	1.6095	down
FPRO_03764	XM_031225988.1	2.62885	down
FPRO_03762	XM_031225990.1	1.90124	down
FPRO_03761	XM_031225991.1	2.344	down
FPRO_03760	XM_031225992.1	1.57324	down
FPRO_03759	XM_031225993.1	1.52566	down
FPRO_03759	XM_031225993.1	2.11122	down
FPRO_03758	XM_031225994.1	1.95557	down
FPRO_03757	XM_031225996.1	2.1849	down
FPRO_03756	XM_031225997.1	1.73081	down
FPRO_03755	XM_031225998.1	1.90924	down
FPRO_03754	XM_031225999.1	1.52557	down
FPRO_03748	XM_031226005.1	1.99818	down
FPRO_03747	XM_031226007.1	1.49037	down
FPRO_03744	XM_031226010.1	2.32215	down
FPRO_03742	XM_031226012.1	2.40325	down
FPRO_03741	XM_031226013.1	1.4331	down
FPRO_03740	XM_031226014.1	1.63	down
FPRO_03738	XM_031226016.1	1.94467	down
FPRO_03737	XM_031226018.1	1.82245	down
FPRO_03736	XM_031226019.1	1.99637	down
FPRO_03735	XM_031226020.1	1.552	down
FPRO_03735	XM_031226020.1	2.05357	down
FPRO_03734	XM_031226021.1	1.75582	down
FPRO_03734	XM_031226021.1	1.77803	down
FPRO_03734	XM_031226021.1	2.03179	down
FPRO_03732	XM_031226023.1	1.73462	down
FPRO_03732	XM_031226023.1	1.48927	down
FPRO_03732	XM_031226023.1	1.7681	down
FPRO_03731	XM_031226024.1	1.85079	down
FPRO_03730	XM_031226025.1	2.21065	down
FPRO_03729	XM_031226026.1	2.23189	down
FPRO_03728	XM_031226027.1	1.56452	down
FPRO_03727	XM_031226029.1	1.87883	down
FPRO_03727	XM_031226029.1	1.75824	down
FPRO_03726	XM_031226030.1	1.70713	down
FPRO_03725	XM_031226031.1	1.70215	down
FPRO_03724	XM_031226032.1	2.15561	down
FPRO_03721	XM_031226035.1	2.29563	down
FPRO_03718	XM_031226038.1	1.67948	down
FPRO_03717	XM_031226041.1	2.25629	down
FPRO_03715	XM_031226043.1	2.32896	down
FPRO_03714	XM_031226044.1	1.7336	down
FPRO_03711	XM_031226047.1	1.48733	down
FPRO_03710	XM_031226048.1	1.90797	down
FPRO_03710	XM_031226048.1	1.74106	down
FPRO_03708	XM_031226050.1	2.03912	down
FPRO_03707	XM_031226052.1	1.57817	down
FPRO_03706	XM_031226053.1	1.48429	down
FPRO_03706	XM_031226053.1	1.92358	down
FPRO_03705	XM_031226054.1	1.89919	down
FPRO_03705	XM_031226054.1	1.58526	down
FPRO_03704	XM_031226055.1	1.73835	down
FPRO_03704	XM_031226055.1	1.89253	down
FPRO_03704	XM_031226055.1	1.43875	down
FPRO_03703	XM_031226056.1	1.69483	down
FPRO_03702	XM_031226057.1	1.76338	down
FPRO_03702	XM_031226057.1	1.42931	down
FPRO_03701	XM_031226058.1	1.63	down
FPRO_03701	XM_031226058.1	1.7137	down
FPRO_03700	XM_031226059.1	1.96364	down
FPRO_03684	XM_031226077.1	1.84467	down
FPRO_03681	XM_031226080.1	1.68195	down
FPRO_03681	XM_031226080.1	1.65195	down
FPRO_03680	XM_031226081.1	1.50449	down
FPRO_03677	XM_031226085.1	1.44938	down
FPRO_03676	XM_031226086.1	1.92477	down
FPRO_03674	XM_031226088.1	1.88711	down
FPRO_03672	XM_031226090.1	1.88613	down
FPRO_03672	XM_031226090.1	1.95573	down
FPRO_03671	XM_031226091.1	1.9113	down
FPRO_03664	XM_031226099.1	2.20783	down
FPRO_03664	XM_031226099.1	1.71123	down
FPRO_03663	XM_031226100.1	1.46686	down
FPRO_03663	XM_031226100.1	1.52274	down
FPRO_03662	XM_031226101.1	1.53286	down
FPRO_03661	XM_031226102.1	1.59449	down
FPRO_03661	XM_031226102.1	1.67902	down
FPRO_03659	XM_031226104.1	2.36192	down
FPRO_03658	XM_031226105.1	1.98625	down
FPRO_03657	XM_031226107.1	1.89409	down
FPRO_03656	XM_031226108.1	1.68758	down
FPRO_03656	XM_031226108.1	1.81013	down
FPRO_03654	XM_031226110.1	1.94254	down
FPRO_03653	XM_031226111.1	2.38666	down
FPRO_03651	XM_031226113.1	2.13153	down
FPRO_03651	XM_031226113.1	1.74322	down
FPRO_03650	XM_031226114.1	1.65823	down
FPRO_03649	XM_031226115.1	2.04886	down
FPRO_03648	XM_031226116.1	1.84467	down
FPRO_03647	XM_031226118.1	1.66033	down
FPRO_03647	XM_031226118.1	1.31653	down
FPRO_03644	XM_031226121.1	1.77968	down
FPRO_03643	XM_031226122.1	1.38794	down
FPRO_03642	XM_031226123.1	1.64387	down
FPRO_03641	XM_031226124.1	1.68218	down
FPRO_03641	XM_031226124.1	1.54839	down
FPRO_03640	XM_031226125.1	1.96808	down
FPRO_03639	XM_031226126.1	1.96444	down
FPRO_03638	XM_031226127.1	1.65902	down
FPRO_03635	XM_031226131.1	1.74612	down
FPRO_03632	XM_031226134.1	1.43067	down
FPRO_03625	XM_031226142.1	1.30912	down
FPRO_03625	XM_031226142.1	1.53325	down
FPRO_03623	XM_031226144.1	1.72356	down
FPRO_03621	XM_031226146.1	1.89194	down
FPRO_03621	XM_031226146.1	2.57183	down
FPRO_03616	XM_031226153.1	1.92997	down
FPRO_03616	XM_031226153.1	1.53075	down
rrna52	XR_004093516.1	1.4669	down
FPRO_03613	XM_031226156.1	1.48569	down
FPRO_03612	XM_031226157.1	1.67058	down
FPRO_03611	XM_031226158.1	1.82281	down
FPRO_03611	XM_031226158.1	1.64433	down
FPRO_03610	XM_031226159.1	1.41791	down
FPRO_03609	XM_031226160.1	2.02237	down
FPRO_03608	XM_031226161.1	1.65881	down
FPRO_03606	XM_031226164.1	1.64785	down
FPRO_03605	XM_031226165.1	1.40565	down
FPRO_03605	XM_031226165.1	1.52116	down
FPRO_03603	XM_031226167.1	1.44877	down
FPRO_03601	XM_031226169.1	1.32929	down
FPRO_03600	XM_031226170.1	1.30389	down
FPRO_03599	XM_031226171.1	1.55395	down
FPRO_03598	XM_031226172.1	1.50117	down
FPRO_03597	XM_031226174.1	1.97073	down
FPRO_03596	XM_031226175.1	1.81433	down
FPRO_03596	XM_031226175.1	1.67948	down
FPRO_03595	XM_031226176.1	2.35879	down
FPRO_03591	XM_031226180.1	1.92754	down
FPRO_03590	XM_031226181.1	1.52518	down
FPRO_03589	XM_031226182.1	2.1826	down
FPRO_03589	XM_031226182.1	1.32929	down
FPRO_03588	XM_031226183.1	2.17574	down
FPRO_03587	XM_031226185.1	1.88321	down
FPRO_03586	XM_031226186.1	1.83368	down
FPRO_03586	XM_031226186.1	1.93444	down
FPRO_03585	XM_031226187.1	1.83348	down
FPRO_03584	XM_031226188.1	1.5541	down
FPRO_03584	XM_031226188.1	1.53691	down
FPRO_03583	XM_031226189.1	2.23502	down
FPRO_03582	XM_031226190.1	1.56561	down
FPRO_03581	XM_031226191.1	1.35827	down
FPRO_03580	XM_031226192.1	1.91798	down
FPRO_03580	XM_031226192.1	1.91319	down
FPRO_03579	XM_031226193.1	1.75706	down
FPRO_03578	XM_031226194.1	2.08317	down
FPRO_03577	XM_031226196.1	1.74635	down
FPRO_03576	XM_031226197.1	1.70413	down
FPRO_03574	XM_031226199.1	2.4218	down
FPRO_03574	XM_031226199.1	2.03179	down
FPRO_03573	XM_031226200.1	1.93274	down
FPRO_03573	XM_031226200.1	1.90797	down
FPRO_03572	XM_031226201.1	1.89919	down
FPRO_03569	XM_031226204.1	1.73003	down
FPRO_03568	XM_031226205.1	1.65823	down
FPRO_03567	XM_031226207.1	2.12367	down
FPRO_03567	XM_031226207.1	1.53369	down
FPRO_03566	XM_031226208.1	1.46683	down
FPRO_03564	XM_031226210.1	1.67948	down
FPRO_03563	XM_031226211.1	1.96012	down
FPRO_03562	XM_031226212.1	1.43465	down
FPRO_03560	XM_031226214.1	1.66595	down
FPRO_03559	XM_031226215.1	1.81013	down
FPRO_03558	XM_031226216.1	2.15561	down
FPRO_03557	XM_031226218.1	1.69981	down
FPRO_03555	XM_031226220.1	1.58421	down
FPRO_03554	XM_031226221.1	2.15564	down
FPRO_03553	XM_031226222.1	1.53421	down
FPRO_03551	XM_031226224.1	1.5673	down
FPRO_03550	XM_031226225.1	2.28156	down
FPRO_03549	XM_031226226.1	1.76995	down
FPRO_03548	XM_031226227.1	1.93352	down
FPRO_03547	XM_031226229.1	1.332	down
FPRO_03546	XM_031226230.1	1.62331	down
FPRO_03545	XM_031226231.1	2.03179	down
FPRO_03544	XM_031226232.1	2.23502	down
FPRO_03543	XM_031226233.1	1.71123	down
FPRO_03542	XM_031226234.1	2.28143	down
FPRO_03541	XM_031226235.1	1.71123	down
FPRO_03541	XM_031226235.1	1.64433	down
FPRO_03540	XM_031226236.1	1.7709	down
FPRO_03540	XM_031226236.1	1.70265	down
FPRO_03540	XM_031226236.1	1.89579	down
FPRO_03540	XM_031226236.1	1.61726	down
FPRO_03539	XM_031226237.1	2.3713	down
FPRO_03539	XM_031226237.1	1.6364	down
FPRO_03538	XM_031226238.1	1.48307	down
FPRO_03537	XM_031226240.1	2.21619	down
FPRO_03537	XM_031226240.1	1.8238	down
FPRO_03536	XM_031226241.1	1.81311	down
FPRO_03534	XM_031226243.1	2.01943	down
FPRO_03533	XM_031226244.1	1.97693	down
FPRO_03532	XM_031226245.1	2.29031	down
FPRO_03531	XM_031226246.1	1.96038	down
FPRO_03530	XM_031226247.1	2.05656	down
FPRO_03525	XM_031226253.1	2.4692	down
FPRO_03524	XM_031226254.1	2.0517	down
FPRO_03523	XM_031226255.1	1.94206	down
FPRO_03522	XM_031226256.1	1.88808	down
FPRO_03521	XM_031226257.1	1.92997	down
FPRO_03521	XM_031226257.1	1.52949	down
FPRO_03519	XM_031226259.1	1.88049	down
FPRO_03518	XM_031226260.1	2.24977	down
FPRO_03518	XM_031226260.1	1.64177	down
FPRO_03517	XM_031226263.1	1.95212	down
FPRO_03517	XM_031226263.1	1.5679	down
FPRO_03515	XM_031226265.1	2.20653	down
FPRO_03511	XM_031226269.1	2.05033	down
FPRO_03508	XM_031226272.1	1.72862	down
FPRO_03505	XM_031226276.1	1.61639	down
FPRO_03504	XM_031226277.1	1.65823	down
FPRO_03503	XM_031226278.1	1.8707	down
FPRO_03501	XM_031226280.1	1.94705	down
FPRO_03498	XM_031226283.1	2.10507	down
FPRO_03497	XM_031226285.1	2.39998	down
FPRO_03496	XM_031226286.1	2.07431	down
FPRO_03493	XM_031226289.1	2.2173	down
FPRO_03492	XM_031226290.1	2.17574	down
FPRO_03491	XM_031226291.1	1.9947	down
FPRO_03490	XM_031226292.1	1.89697	down
FPRO_03489	XM_031226293.1	1.6142	down
FPRO_03487	XM_031226296.1	2.01073	down
FPRO_03486	XM_031226297.1	1.34467	down
FPRO_03485	XM_031226298.1	2.20106	down
FPRO_03483	XM_031226300.1	2.03723	down
FPRO_03483	XM_031226300.1	1.54994	down
FPRO_03482	XM_031226301.1	1.96138	down
FPRO_03481	XM_031226302.1	1.43193	down
FPRO_03481	XM_031226302.1	1.552	down
FPRO_03480	XM_031226303.1	1.85006	down
FPRO_03478	XM_031226305.1	1.78571	down
FPRO_03476	XM_031226308.1	1.39956	down
FPRO_03474	XM_031226310.1	1.48429	down
FPRO_03473	XM_031226311.1	1.34965	down
FPRO_03471	XM_031226313.1	1.95141	down
FPRO_03470	XM_031226314.1	1.80243	down
FPRO_03469	XM_031226315.1	1.72046	down
FPRO_03469	XM_031226315.1	1.77994	down
FPRO_03467	XM_031226318.1	1.41051	down
FPRO_03466	XM_031226319.1	2.00807	down
FPRO_03462	XM_031226323.1	1.56354	down
FPRO_03461	XM_031226324.1	1.58914	down
FPRO_03460	XM_031226325.1	1.79813	down
FPRO_03459	XM_031226326.1	1.82849	down
FPRO_03456	XM_031226330.1	1.99609	down
FPRO_03453	XM_031226333.1	1.67058	down
FPRO_03452	XM_031226334.1	1.87697	down
FPRO_03451	XM_031226335.1	1.93444	down
FPRO_03451	XM_031226335.1	1.6095	down
FPRO_03450	XM_031226336.1	1.65134	down
FPRO_03450	XM_031226336.1	1.85142	down
FPRO_03449	XM_031226337.1	1.58195	down
FPRO_03448	XM_031226338.1	1.7336	down
FPRO_03447	XM_031226340.1	1.4669	down
FPRO_03446	XM_031226341.1	1.8627	down
FPRO_03446	XM_031226341.1	2.14147	down
FPRO_03444	XM_031226343.1	1.41051	down
FPRO_03443	XM_031226344.1	1.67036	down
FPRO_03443	XM_031226344.1	1.78221	down
FPRO_03441	XM_031226346.1	2.17041	down
FPRO_03438	XM_031226349.1	1.40487	down
FPRO_03434	XM_031226354.1	1.61726	down
FPRO_03431	XM_031226357.1	2.2391	down
FPRO_03429	XM_031226359.1	1.59552	down
FPRO_03429	XM_031226359.1	1.72197	down
FPRO_03428	XM_031226360.1	1.46693	down
FPRO_03427	XM_031226362.1	1.76762	down
FPRO_03427	XM_031226362.1	1.95554	down
FPRO_03422	XM_031226367.1	1.46683	down
FPRO_03421	XM_031226368.1	1.44938	down
FPRO_03409	XM_031226382.1	1.66646	down
FPRO_03408	XM_031226383.1	1.95141	down
FPRO_03408	XM_031226383.1	1.39038	down
FPRO_03403	XM_031226389.1	1.41791	down
FPRO_03401	XM_031226391.1	2.02667	down
FPRO_03400	XM_031226392.1	1.42357	down
FPRO_03398	XM_031226394.1	1.52805	down
FPRO_03393	XM_031226400.1	2.01944	down
FPRO_03390	XM_031226403.1	1.52116	down
FPRO_03387	XM_031226407.1	1.39702	down
FPRO_03386	XM_031226408.1	1.52079	down
FPRO_03386	XM_031226408.1	2.08381	down
FPRO_03378	XM_031226416.1	1.70215	down
FPRO_03371	XM_031226424.1	1.37957	down
FPRO_03369	XM_031226426.1	2.00837	down
FPRO_03367	XM_031226429.1	1.59537	down
FPRO_03363	XM_031226433.1	1.55736	down
FPRO_03362	XM_031226434.1	1.79923	down
FPRO_03353	XM_031226444.1	1.70265	down
FPRO_03353	XM_031226444.1	1.72308	down
FPRO_03350	XM_031226447.1	1.79069	down
FPRO_03344	XM_031226454.1	1.4037	down
FPRO_03343	XM_031226455.1	1.51755	down
FPRO_03343	XM_031226455.1	1.61374	down
FPRO_03342	XM_031226456.1	2.1774	down
FPRO_03342	XM_031226456.1	1.65485	down
FPRO_03342	XM_031226456.1	2.22228	down
FPRO_03342	XM_031226456.1	1.4716	down
FPRO_03339	XM_031226459.1	1.32488	down
FPRO_03338	XM_031226460.1	1.95583	down
FPRO_03335	XM_031226464.1	2.16328	down
FPRO_03334	XM_031226465.1	2.10441	down
FPRO_03328	XM_031226471.1	1.77786	down
FPRO_03327	XM_031226473.1	2.13046	down
rrna53	XR_004093517.1	1.49786	down
FPRO_03323	XM_031226477.1	1.37869	down
FPRO_03322	XM_031226478.1	1.482	down
FPRO_03320	XM_031226480.1	1.80242	down
FPRO_03319	XM_031226481.1	1.37637	down
FPRO_03311	XM_031226491.1	1.46697	down
FPRO_03310	XM_031226492.1	1.93811	down
FPRO_03305	XM_031226498.1	1.59449	down
FPRO_03304	XM_031226499.1	1.34017	down
FPRO_03303	XM_031226500.1	1.53075	down
FPRO_03302	XM_031226501.1	1.69981	down
FPRO_03301	XM_031226502.1	1.77063	down
FPRO_03301	XM_031226502.1	1.83943	down
FPRO_03299	XM_031226504.1	1.74925	down
FPRO_03294	XM_031226510.1	1.49936	down
FPRO_03292	XM_031226512.1	1.77239	down
FPRO_03291	XM_031226513.1	2.09868	down
FPRO_03290	XM_031226514.1	1.90924	down
FPRO_03290	XM_031226514.1	1.4863	down
FPRO_03289	XM_031226515.1	1.33533	down
FPRO_03285	XM_031226520.1	1.332	down
FPRO_03283	XM_031226522.1	1.75742	down
FPRO_03280	XM_031226525.1	1.91776	down
FPRO_03278	XM_031226527.1	1.61574	down
FPRO_03274	XM_031226532.1	2.21608	down
FPRO_03271	XM_031226535.1	1.66945	down
FPRO_03265	XM_031226542.1	1.29875	down
FPRO_03260	XM_031226547.1	2.02237	down
FPRO_03253	XM_031226555.1	1.42625	down
FPRO_03251	XM_031226557.1	1.74322	down
FPRO_03251	XM_031226557.1	1.74334	down
FPRO_03250	XM_031226558.1	1.36516	down
FPRO_03238	XM_031226571.1	2.12287	down
FPRO_03234	XM_031226576.1	1.44576	down
FPRO_03233	XM_031226577.1	1.41448	down
FPRO_03229	XM_031226581.1	1.43705	down
FPRO_03228	XM_031226582.1	1.58449	down
FPRO_03221	XM_031226590.1	1.87525	down
FPRO_03219	XM_031226592.1	1.7336	down
FPRO_03217	XM_031226596.1	1.51148	down
FPRO_03214	XM_031226599.1	1.74	down
FPRO_03214	XM_031226599.1	1.77096	down
FPRO_03214	XM_031226599.1	1.46686	down
FPRO_03214	XM_031226599.1	1.89579	down
FPRO_03213	XM_031226600.1	1.74882	down
FPRO_03213	XM_031226600.1	2.21836	down
FPRO_03213	XM_031226600.1	2.34614	down
FPRO_03213	XM_031226600.1	1.97367	down
FPRO_03212	XM_031226601.1	2.36798	down
FPRO_03211	XM_031226602.1	1.72308	down
FPRO_03211	XM_031226602.1	1.8627	down
FPRO_03210	XM_031226603.1	1.84694	down
FPRO_03206	XM_031226608.1	1.87884	down
FPRO_03203	XM_031226611.1	1.57546	down
FPRO_03202	XM_031226612.1	1.65022	down
FPRO_03201	XM_031226613.1	1.71051	down
FPRO_03201	XM_031226613.1	1.4581	down
FPRO_03199	XM_031226615.1	1.85384	down
FPRO_03198	XM_031226616.1	1.65823	down
FPRO_03197	XM_031226618.1	1.82503	down
FPRO_03197	XM_031226618.1	1.75645	down
FPRO_03196	XM_031226619.1	1.76353	down
FPRO_03194	XM_031226621.1	1.9206	down
FPRO_03191	XM_031226624.1	1.96444	down
FPRO_03184	XM_031226632.1	1.53664	down
FPRO_03179	XM_031226637.1	1.62991	down
FPRO_03167	XM_031226651.1	1.50769	down
FPRO_03163	XM_031226655.1	1.75774	down
FPRO_03163	XM_031226655.1	1.41946	down
FPRO_03162	XM_031226656.1	1.95554	down
FPRO_03161	XM_031226657.1	1.62439	down
FPRO_03158	XM_031226660.1	1.51148	down
FPRO_03155	XM_031226664.1	1.57466	down
FPRO_03154	XM_031226665.1	1.99826	down
FPRO_03149	XM_031226670.1	1.97601	down
FPRO_03143	XM_031226677.1	1.36212	down
FPRO_03143	XM_031226677.1	1.50819	down
FPRO_03137	XM_031226684.1	1.67058	down
FPRO_03131	XM_031226690.1	1.66595	down
FPRO_03129	XM_031226692.1	1.58243	down
FPRO_03129	XM_031226692.1	1.52805	down
FPRO_03129	XM_031226692.1	1.68918	down
FPRO_03126	XM_031226696.1	1.57947	down
FPRO_03126	XM_031226696.1	2.10733	down
FPRO_03125	XM_031226697.1	1.7092	down
FPRO_03125	XM_031226697.1	1.74322	down
FPRO_03118	XM_031226704.1	1.78571	down
FPRO_03118	XM_031226704.1	1.57324	down
FPRO_03118	XM_031226704.1	1.44938	down
FPRO_03115	XM_031226709.1	1.39447	down
FPRO_03113	XM_031226711.1	1.39447	down
FPRO_03102	XM_031226723.1	1.67364	down
FPRO_03094	XM_031226732.1	2.02794	down
FPRO_03090	XM_031226736.1	1.58421	down
FPRO_03090	XM_031226736.1	1.67396	down
FPRO_03090	XM_031226736.1	1.79404	down
FPRO_03090	XM_031226736.1	1.55395	down
FPRO_03089	XM_031226737.1	1.48826	down
FPRO_03085	XM_031226742.1	1.4177	down
FPRO_03082	XM_031226745.1	1.73797	down
FPRO_03081	XM_031226746.1	1.33533	down
FPRO_03075	XM_031226753.1	1.48152	down
FPRO_03075	XM_031226753.1	1.96251	down
FPRO_03074	XM_031226754.1	1.7015	down
FPRO_03074	XM_031226754.1	1.78402	down
FPRO_03073	XM_031226755.1	1.69597	down
FPRO_03073	XM_031226755.1	1.73167	down
FPRO_03070	XM_031226758.1	1.32929	down
FPRO_03069	XM_031226759.1	1.49263	down
FPRO_03063	XM_031226766.1	1.6095	down
FPRO_03056	XM_031226774.1	1.83832	down
FPRO_03051	XM_031226779.1	1.46683	down
FPRO_03039	XM_031226792.1	1.6747	down
FPRO_03038	XM_031226793.1	1.93115	down
FPRO_03038	XM_031226793.1	1.50306	down
FPRO_03036	XM_031226796.1	1.97013	down
FPRO_03035	XM_031226797.1	1.54841	down
FPRO_03035	XM_031226797.1	1.64413	down
FPRO_03034	XM_031226798.1	1.53862	down
FPRO_03034	XM_031226798.1	1.60181	down
FPRO_03034	XM_031226798.1	1.76005	down
FPRO_03034	XM_031226798.1	1.65716	down
FPRO_03034	XM_031226798.1	1.35827	down
FPRO_03030	XM_031226802.1	1.42216	down
FPRO_03030	XM_031226802.1	1.58558	down
FPRO_03025	XM_031226808.1	1.69095	down
FPRO_03022	XM_031226811.1	1.40829	down
FPRO_03013	XM_031226823.1	1.58184	down
FPRO_03011	XM_031226825.1	1.62986	down
FPRO_03009	XM_031226827.1	1.52557	down
FPRO_02997	XM_031226841.1	1.77968	down
FPRO_02997	XM_031226841.1	1.73167	down
FPRO_02996	XM_031226842.1	1.35641	down
FPRO_02993	XM_031226845.1	1.50891	down
FPRO_02993	XM_031226845.1	1.72678	down
FPRO_02993	XM_031226845.1	1.55736	down
FPRO_02992	XM_031226846.1	1.52799	down
FPRO_02991	XM_031226847.1	1.86034	down
FPRO_02980	XM_031226859.1	1.65485	down
FPRO_02978	XM_031226861.1	1.45906	down
FPRO_02978	XM_031226861.1	1.84945	down
FPRO_02969	XM_031226871.1	1.35827	down
FPRO_02968	XM_031226872.1	1.81878	down
FPRO_02967	XM_031226874.1	2.24449	down
FPRO_02967	XM_031226874.1	1.54208	down
FPRO_02962	XM_031226879.1	1.52805	down
FPRO_02962	XM_031226879.1	1.63658	down
FPRO_02957	XM_031226885.1	1.57546	down
FPRO_02954	XM_031226888.1	1.88808	down
FPRO_02954	XM_031226888.1	1.39172	down
FPRO_02954	XM_031226888.1	1.84467	down
FPRO_02953	XM_031226889.1	1.72308	down
FPRO_02952	XM_031226890.1	1.46683	down
FPRO_02951	XM_031226891.1	1.50603	down
FPRO_02951	XM_031226891.1	1.71485	down
FPRO_02950	XM_031226892.1	1.81878	down
FPRO_02949	XM_031226893.1	2.01907	down
FPRO_02948	XM_031226894.1	1.36212	down
FPRO_02947	XM_031226896.1	1.76014	down
FPRO_02947	XM_031226896.1	1.97848	down
FPRO_02946	XM_031226897.1	2.11122	down
FPRO_02943	XM_031226900.1	1.48648	down
FPRO_02941	XM_031226902.1	1.73654	down
FPRO_02935	XM_031226909.1	1.53926	down
FPRO_02935	XM_031226909.1	1.42784	down
FPRO_02934	XM_031226910.1	1.33647	down
FPRO_02934	XM_031226910.1	1.35827	down
FPRO_02934	XM_031226910.1	1.68829	down
FPRO_02933	XM_031226911.1	1.85384	down
FPRO_02927	XM_031226918.1	1.32018	down
FPRO_02926	XM_031226919.1	1.71123	down
FPRO_02925	XM_031226920.1	1.59449	down
FPRO_02923	XM_031226922.1	1.58914	down
FPRO_02921	XM_031226924.1	1.53102	down
FPRO_02920	XM_031226925.1	1.78835	down
FPRO_02919	XM_031226926.1	1.67948	down
FPRO_02919	XM_031226926.1	1.74469	down
FPRO_02918	XM_031226927.1	1.40042	down
FPRO_02917	XM_031226930.1	1.95573	down
FPRO_02916	XM_031226931.1	1.33533	down
FPRO_02916	XM_031226931.1	1.3448	down
FPRO_02912	XM_031226935.1	1.6605	down
FPRO_02911	XM_031226936.1	1.76762	down
FPRO_02907	XM_031226941.1	1.61726	down
FPRO_02907	XM_031226941.1	1.32018	down
FPRO_02906	XM_031226942.1	1.57155	down
FPRO_02906	XM_031226942.1	1.59356	down
FPRO_02901	XM_031226947.1	1.88049	down
FPRO_02896	XM_031226953.1	1.39726	down
FPRO_02896	XM_031226953.1	1.71123	down
FPRO_02896	XM_031226953.1	1.7336	down
FPRO_02896	XM_031226953.1	1.67165	down
FPRO_02896	XM_031226953.1	1.50449	down
FPRO_02896	XM_031226953.1	1.96868	down
FPRO_02895	XM_031226954.1	1.35641	down
FPRO_02895	XM_031226954.1	1.60735	down
FPRO_02895	XM_031226954.1	1.59404	down
FPRO_02894	XM_031226955.1	1.50449	down
FPRO_02891	XM_031226958.1	1.54208	down
FPRO_02890	XM_031226959.1	1.38874	down
FPRO_02887	XM_031226963.1	1.63605	down
FPRO_02884	XM_031226966.1	1.7121	down
FPRO_02884	XM_031226966.1	1.48733	down
FPRO_02883	XM_031226967.1	1.4481	down
FPRO_02882	XM_031226968.1	1.77994	down
FPRO_02877	XM_031226974.1	1.34467	down
FPRO_02874	XM_031226977.1	1.80505	down
FPRO_02862	XM_031226990.1	1.82805	down
FPRO_02859	XM_031226993.1	1.52557	down
FPRO_02855	XM_031226998.1	1.54604	down
FPRO_02853	XM_031227000.1	1.92081	down
FPRO_02853	XM_031227000.1	1.81732	down
FPRO_02852	XM_031227001.1	1.54746	down
FPRO_02841	XM_031227013.1	1.59888	down
FPRO_02841	XM_031227013.1	2.02237	down
FPRO_02840	XM_031227014.1	1.64475	down
FPRO_02840	XM_031227014.1	1.99818	down
FPRO_02839	XM_031227015.1	1.42931	down
FPRO_02838	XM_031227016.1	1.54512	down
FPRO_02835	XM_031227020.1	1.72104	down
FPRO_02831	XM_031227024.1	1.52805	down
FPRO_02831	XM_031227024.1	2.15926	down
FPRO_02825	XM_031227031.1	1.40901	down
FPRO_02824	XM_031227032.1	1.92153	down
FPRO_02820	XM_031227036.1	1.33734	down
FPRO_02819	XM_031227037.1	1.48648	down
FPRO_02816	XM_031227042.1	1.77762	down
FPRO_02815	XM_031227043.1	1.589	down
FPRO_02810	XM_031227048.1	1.82805	down
FPRO_02810	XM_031227048.1	1.70713	down
FPRO_02810	XM_031227048.1	1.65022	down
FPRO_02809	XM_031227049.1	1.52805	down
FPRO_02809	XM_031227049.1	1.37407	down
FPRO_02808	XM_031227050.1	1.38255	down
FPRO_02807	XM_031227052.1	1.60033	down
FPRO_02806	XM_031227053.1	1.77803	down
FPRO_02806	XM_031227053.1	1.45042	down
FPRO_02803	XM_031227056.1	1.74622	down
FPRO_02803	XM_031227056.1	1.44661	down
FPRO_02803	XM_031227056.1	2.19586	down
FPRO_02803	XM_031227056.1	1.77803	down
FPRO_02802	XM_031227057.1	1.5962	down
FPRO_02802	XM_031227057.1	1.50603	down
FPRO_02796	XM_031227064.1	1.87883	down
FPRO_02795	XM_031227065.1	1.72661	down
FPRO_02795	XM_031227065.1	1.552	down
FPRO_02794	XM_031227066.1	1.73979	down
FPRO_02794	XM_031227066.1	2.05033	down
FPRO_02793	XM_031227067.1	1.37292	down
FPRO_02792	XM_031227068.1	2.07768	down
FPRO_02791	XM_031227069.1	1.77786	down
FPRO_02789	XM_031227071.1	1.91734	down
FPRO_02789	XM_031227071.1	1.69925	down
FPRO_02788	XM_031227072.1	1.59356	down
FPRO_02788	XM_031227072.1	1.50603	down
FPRO_02786	XM_031227075.1	1.50769	down
FPRO_02786	XM_031227075.1	1.77278	down
FPRO_02785	XM_031227076.1	1.74617	down
FPRO_02784	XM_031227077.1	1.35641	down
FPRO_02777	XM_031227085.1	1.59846	down
FPRO_02777	XM_031227085.1	1.63605	down
FPRO_02776	XM_031227086.1	1.98094	down
FPRO_02776	XM_031227086.1	2.01481	down
FPRO_02775	XM_031227087.1	1.94934	down
FPRO_02775	XM_031227087.1	1.9113	down
FPRO_02775	XM_031227087.1	1.67902	down
FPRO_02775	XM_031227087.1	1.58914	down
FPRO_02775	XM_031227087.1	1.33533	down
FPRO_02774	XM_031227088.1	1.88566	down
FPRO_02774	XM_031227088.1	1.51919	down
FPRO_02772	XM_031227090.1	1.74471	down
FPRO_02772	XM_031227090.1	1.48449	down
FPRO_02768	XM_031227094.1	1.82835	down
FPRO_02768	XM_031227094.1	1.59709	down
FPRO_02764	XM_031227099.1	1.75203	down
FPRO_02761	XM_031227102.1	1.47844	down
FPRO_02761	XM_031227102.1	1.64433	down
FPRO_02758	XM_031227105.1	1.57155	down
FPRO_02753	XM_031227111.1	1.83474	down
FPRO_02753	XM_031227111.1	1.67077	down
FPRO_02753	XM_031227111.1	1.79275	down
FPRO_02748	XM_031227116.1	1.55225	down
FPRO_02748	XM_031227116.1	1.55968	down
FPRO_02747	XM_031227118.1	1.57967	down
FPRO_02747	XM_031227118.1	1.4669	down
FPRO_02743	XM_031227122.1	1.82277	down
FPRO_02734	XM_031227132.1	1.42784	down
FPRO_02724	XM_031227143.1	1.60033	down
FPRO_02714	XM_031227155.1	1.59287	down
FPRO_02712	XM_031227157.1	1.48152	down
FPRO_02711	XM_031227158.1	1.79923	down
FPRO_02708	XM_031227161.1	1.60376	down
FPRO_02706	XM_031227164.1	1.38552	down
FPRO_02705	XM_031227165.1	1.69421	down
FPRO_02703	XM_031227167.1	1.74322	down
FPRO_02703	XM_031227167.1	1.86883	down
FPRO_02702	XM_031227168.1	1.49517	down
FPRO_02700	XM_031227170.1	1.67364	down
FPRO_02700	XM_031227170.1	1.49649	down
FPRO_02700	XM_031227170.1	1.3301	down
FPRO_02696	XM_031227175.1	1.62986	down
FPRO_02687	XM_031227185.1	2.04067	down
FPRO_02686	XM_031227186.1	1.53075	down
FPRO_02685	XM_031227187.1	1.82312	down
FPRO_02685	XM_031227187.1	1.65592	down
FPRO_02679	XM_031227193.1	1.92562	down
FPRO_02675	XM_031227198.1	1.47585	down
FPRO_02663	XM_031227211.1	1.60109	down
FPRO_02660	XM_031227214.1	2.26836	down
FPRO_02657	XM_031227218.1	1.77032	down
FPRO_02656	XM_031227219.1	1.81878	down
FPRO_02648	XM_031227227.1	1.51736	down
FPRO_02648	XM_031227227.1	1.73083	down
FPRO_02645	XM_031227231.1	1.48496	down
FPRO_02644	XM_031227232.1	1.64285	down
FPRO_02642	XM_031227234.1	1.84347	down
FPRO_02636	XM_031227241.1	1.75638	down
FPRO_02635	XM_031227242.1	2.0609	down
FPRO_02633	XM_031227244.1	1.56467	down
FPRO_02633	XM_031227244.1	1.58676	down
FPRO_02632	XM_031227245.1	1.70372	down
FPRO_02632	XM_031227245.1	1.90435	down
FPRO_02632	XM_031227245.1	1.58914	down
FPRO_02629	XM_031227248.1	1.52805	down
FPRO_02628	XM_031227249.1	1.44738	down
FPRO_02621	XM_031227257.1	1.60324	down
FPRO_02620	XM_031227258.1	2.09868	down
FPRO_02613	XM_031227267.1	1.76014	down
FPRO_02611	XM_031227269.1	1.81616	down
FPRO_02610	XM_031227270.1	1.78221	down
FPRO_02610	XM_031227270.1	1.86688	down
FPRO_02605	XM_031227276.1	1.95141	down
FPRO_02600	XM_031227281.1	2.09868	down
FPRO_02599	XM_031227282.1	1.47113	down
FPRO_02596	XM_031227286.1	1.93005	down
FPRO_02593	XM_031227289.1	1.42092	down
FPRO_02592	XM_031227290.1	1.80604	down
FPRO_02592	XM_031227290.1	1.31653	down
FPRO_02592	XM_031227290.1	1.50449	down
FPRO_02591	XM_031227291.1	1.55816	down
FPRO_02591	XM_031227291.1	1.69784	down
FPRO_02588	XM_031227294.1	1.67396	down
FPRO_02575	XM_031227309.1	1.51955	down
FPRO_02572	XM_031227312.1	1.57812	down
FPRO_02569	XM_031227315.1	1.65022	down
FPRO_02565	XM_031227320.1	1.41051	down
FPRO_02565	XM_031227320.1	1.52242	down
FPRO_02565	XM_031227320.1	1.41257	down
FPRO_02561	XM_031227324.1	1.8742	down
FPRO_02551	XM_031227335.1	1.59103	down
FPRO_02551	XM_031227335.1	1.62217	down
FPRO_02548	XM_031227338.1	1.57155	down
FPRO_02546	XM_031227341.1	1.94314	down
FPRO_02545	XM_031227342.1	2.20007	down
FPRO_02544	XM_031227343.1	1.73835	down
FPRO_02544	XM_031227343.1	1.69394	down
FPRO_02538	XM_031227349.1	1.91651	down
FPRO_02536	XM_031227352.1	2.12004	down
FPRO_02534	XM_031227354.1	1.66488	down
FPRO_02534	XM_031227354.1	1.75582	down
FPRO_02530	XM_031227358.1	1.51736	down
FPRO_02526	XM_031227363.1	1.53562	down
FPRO_02523	XM_031227366.1	1.95989	down
FPRO_02519	XM_031227370.1	1.64475	down
FPRO_02519	XM_031227370.1	2.18111	down
FPRO_02516	XM_031227375.1	1.46678	down
FPRO_02513	XM_031227378.1	2.29168	down
FPRO_02508	XM_031227383.1	1.46693	down
FPRO_02508	XM_031227383.1	2.1894	down
FPRO_02507	XM_031227385.1	2.04458	down
FPRO_02505	XM_031227387.1	2.18025	down
FPRO_02504	XM_031227388.1	1.48569	down
FPRO_02504	XM_031227388.1	1.79275	down
FPRO_02501	XM_031227391.1	1.68405	down
FPRO_02499	XM_031227393.1	1.72678	down
FPRO_02492	XM_031227401.1	1.30389	down
FPRO_02491	XM_031227402.1	1.53926	down
FPRO_02490	XM_031227403.1	1.64394	down
FPRO_02490	XM_031227403.1	1.89009	down
FPRO_02489	XM_031227404.1	1.36516	down
FPRO_02487	XM_031227407.1	2.09232	down
FPRO_02487	XM_031227407.1	1.62976	down
FPRO_02486	XM_031227408.1	2.49868	down
FPRO_02485	XM_031227409.1	1.64356	down
FPRO_02484	XM_031227410.1	1.58421	down
FPRO_02482	XM_031227412.1	1.61751	down
FPRO_02481	XM_031227413.1	1.50769	down
FPRO_02477	XM_031227418.1	1.36905	down
FPRO_02477	XM_031227418.1	2.1389	down
FPRO_02474	XM_031227421.1	1.77032	down
FPRO_02473	XM_031227422.1	1.56723	down
FPRO_02469	XM_031227426.1	1.57739	down
FPRO_02467	XM_031227429.1	1.37957	down
FPRO_02466	XM_031227430.1	1.90137	down
FPRO_02464	XM_031227432.1	1.41448	down
FPRO_02463	XM_031227433.1	1.58812	down
FPRO_02461	XM_031227435.1	1.52328	down
FPRO_02459	XM_031227437.1	1.69784	down
FPRO_02458	XM_031227438.1	1.77615	down
FPRO_02457	XM_031227440.1	1.75135	down
FPRO_02456	XM_031227441.1	1.53369	down
FPRO_02456	XM_031227441.1	1.56065	down
FPRO_02453	XM_031227444.1	1.73242	down
FPRO_02451	XM_031227446.1	1.83832	down
FPRO_02446	XM_031227452.1	1.36516	down
FPRO_02446	XM_031227452.1	1.42784	down
FPRO_02446	XM_031227452.1	1.49961	down
FPRO_02446	XM_031227452.1	1.33647	down
FPRO_02445	XM_031227453.1	1.69336	down
FPRO_02445	XM_031227453.1	1.91526	down
FPRO_02443	XM_031227455.1	1.45099	down
FPRO_02443	XM_031227455.1	1.72206	down
FPRO_02443	XM_031227455.1	1.83832	down
FPRO_02441	XM_031227457.1	1.77263	down
FPRO_02441	XM_031227457.1	1.91319	down
FPRO_02441	XM_031227457.1	1.71286	down
FPRO_02440	XM_031227458.1	1.52805	down
FPRO_02440	XM_031227458.1	1.67058	down
FPRO_02439	XM_031227459.1	1.95573	down
FPRO_02437	XM_031227462.1	1.77239	down
FPRO_02436	XM_031227463.1	1.50449	down
FPRO_02436	XM_031227463.1	1.72987	down
FPRO_02428	XM_031227471.1	1.99291	down
FPRO_02428	XM_031227471.1	1.90114	down
FPRO_18059	unassigned_transcript_258	1.44938	down
FPRO_18060	unassigned_transcript_259	1.48496	down
FPRO_02421	XM_031227479.1	1.62986	down
FPRO_02420	XM_031227480.1	1.79802	down
FPRO_02419	XM_031227481.1	1.89863	down
FPRO_02418	XM_031227482.1	1.9113	down
FPRO_02417	XM_031227485.1	1.5341	down
FPRO_02417	XM_031227485.1	1.57974	down
FPRO_02405	XM_031227498.1	1.74925	down
FPRO_02405	XM_031227498.1	1.92355	down
FPRO_02403	XM_031227500.1	1.54994	down
FPRO_02401	XM_031227502.1	1.79058	down
FPRO_02401	XM_031227502.1	1.73314	down
FPRO_02397	XM_031227507.1	1.86368	down
FPRO_02395	XM_031227509.1	1.59011	down
FPRO_02394	XM_031227510.1	2.01673	down
FPRO_02393	XM_031227511.1	1.86093	down
FPRO_02393	XM_031227511.1	1.65485	down
FPRO_02392	XM_031227512.1	1.77968	down
FPRO_02388	XM_031227516.1	1.84694	down
FPRO_02387	XM_031227518.1	1.44661	down
FPRO_02384	XM_031227521.1	1.65259	down
FPRO_02381	XM_031227524.1	1.75458	down
FPRO_02380	XM_031227525.1	1.50769	down
FPRO_02380	XM_031227525.1	1.58476	down
FPRO_02379	XM_031227526.1	1.38533	down
FPRO_02373	XM_031227533.1	1.62976	down
FPRO_02371	XM_031227535.1	1.67396	down
FPRO_02366	XM_031227541.1	1.66049	down
FPRO_02364	XM_031227543.1	1.80696	down
FPRO_02363	XM_031227544.1	1.80072	down
FPRO_02362	XM_031227545.1	1.54208	down
FPRO_02362	XM_031227545.1	1.85871	down
FPRO_02359	XM_031227548.1	1.58526	down
FPRO_02359	XM_031227548.1	2.05255	down
FPRO_02358	XM_031227549.1	1.61632	down
FPRO_02358	XM_031227549.1	1.50306	down
FPRO_02358	XM_031227549.1	1.46678	down
FPRO_02357	XM_031227551.1	1.81676	down
FPRO_02357	XM_031227551.1	1.63	down
FPRO_02357	XM_031227551.1	1.63605	down
FPRO_02356	XM_031227552.1	1.85766	down
FPRO_02355	XM_031227553.1	1.78402	down
FPRO_02355	XM_031227553.1	1.75645	down
FPRO_02354	XM_031227554.1	1.37217	down
FPRO_02352	XM_031227556.1	1.63698	down
FPRO_02350	XM_031227558.1	1.57324	down
FPRO_02349	XM_031227559.1	1.47092	down
FPRO_02348	XM_031227560.1	1.8789	down
FPRO_02347	XM_031227562.1	1.65077	down
FPRO_02341	XM_031227568.1	1.69244	down
FPRO_02340	XM_031227569.1	2.1019	down
FPRO_02339	XM_031227570.1	1.45876	down
FPRO_02339	XM_031227570.1	1.92884	down
FPRO_02338	XM_031227571.1	1.58476	down
FPRO_02336	XM_031227574.1	1.83368	down
FPRO_02335	XM_031227575.1	1.75939	down
FPRO_02333	XM_031227577.1	1.71131	down
FPRO_02333	XM_031227577.1	1.9113	down
FPRO_02332	XM_031227578.1	2.06679	down
FPRO_02331	XM_031227579.1	2.24267	down
FPRO_02330	XM_031227580.1	2.30214	down
FPRO_02329	XM_031227581.1	2.33026	down
FPRO_02328	XM_031227582.1	1.58421	down
FPRO_02327	XM_031227584.1	2.04916	down
FPRO_02325	XM_031227586.1	2.16521	down
FPRO_02325	XM_031227586.1	1.95578	down
FPRO_02324	XM_031227587.1	2.06121	down
FPRO_02323	XM_031227588.1	1.69455	down
FPRO_02322	XM_031227589.1	2.44449	down
FPRO_02320	XM_031227591.1	1.79275	down
FPRO_02319	XM_031227592.1	1.57902	down
FPRO_02318	XM_031227593.1	1.68943	down
FPRO_02317	XM_031227596.1	1.73167	down
FPRO_02315	XM_031227598.1	1.97905	down
FPRO_02313	XM_031227600.1	1.79844	down
[truncated: 18,925 more rows]

## Sheet: ChIP-seq _BCP_vs_CK_GO_up
ONTOLOGY	ID	Description	GeneRatio	BgRatio	pvalue	p.adjust	qvalue	geneID	Count
BP	GO:0032196	transposition	6/358	16/3915	0.00203034	0.967231	0.967231	XP_031080570.1/XP_031087411.1/XP_031082859.1/XP_031086938.1/XP_031089003.1/XP_031088297.1	6
BP	GO:1901616	organic hydroxy compound catabolic process	8/358	28/3915	0.0027333	0.967231	0.967231	XP_031077989.1/XP_031077988.1/XP_031077979.1/XP_031080734.1/XP_031078507.1/XP_031083003.1/XP_031086811.1/XP_031088206.1	8
BP	GO:0045910	negative regulation of DNA recombination	6/358	17/3915	0.00289962	0.967231	0.967231	XP_031077753.1/XP_031080635.1/XP_031083817.1/XP_031087411.1/XP_031087641.1/XP_031088119.1	6
BP	GO:0006384	transcription initiation at RNA polymerase III promoter	5/358	13/3915	0.00431202	0.967231	0.967231	XP_031080570.1/XP_031080771.1/XP_031079601.1/XP_031082859.1/XP_031088297.1	5
BP	GO:0071326	cellular response to monosaccharide stimulus	6/358	19/3915	0.00543092	0.967231	0.967231	XP_031075320.1/XP_031077138.1/XP_031080828.1/XP_031083630.1/XP_031083543.1/XP_031081869.1	6
BP	GO:0071331	cellular response to hexose stimulus	6/358	19/3915	0.00543092	0.967231	0.967231	XP_031075320.1/XP_031077138.1/XP_031080828.1/XP_031083630.1/XP_031083543.1/XP_031081869.1	6
BP	GO:0071333	cellular response to glucose stimulus	6/358	19/3915	0.00543092	0.967231	0.967231	XP_031075320.1/XP_031077138.1/XP_031080828.1/XP_031083630.1/XP_031083543.1/XP_031081869.1	6
BP	GO:0000018	regulation of DNA recombination	9/358	38/3915	0.0060074	0.967231	0.967231	XP_031077753.1/XP_031080635.1/XP_031079022.1/XP_031083817.1/XP_031087411.1/XP_031087641.1/XP_031089003.1/XP_031088031.1/XP_031088119.1	9
CC	GO:0005667	transcription regulator complex	15/343	83/3769	0.00695447	0.574167	0.574167	XP_031075808.1/XP_031075390.1/XP_031074959.1/XP_031077424.1/XP_031077249.1/XP_031080570.1/XP_031079601.1/XP_031084058.1/XP_031082859.1/XP_031082916.1/XP_031086838.1/XP_031089003.1/XP_031087981.1/XP_031088031.1/XP_031088297.1	15
CC	GO:0035861	site of double-strand break	10/343	46/3769	0.00708917	0.574167	0.574167	XP_031076249.1/XP_031076045.1/XP_031077200.1/XP_031077189.1/XP_031079022.1/XP_031083817.1/XP_031087419.1/XP_031087641.1/XP_031086938.1/XP_031088119.1	10
CC	GO:0090734	site of DNA damage	10/343	46/3769	0.00708917	0.574167	0.574167	XP_031076249.1/XP_031076045.1/XP_031077200.1/XP_031077189.1/XP_031079022.1/XP_031083817.1/XP_031087419.1/XP_031087641.1/XP_031086938.1/XP_031088119.1	10
BP	GO:0009746	response to hexose	6/358	20/3915	0.00717289	0.967231	0.967231	XP_031075320.1/XP_031077138.1/XP_031080828.1/XP_031083630.1/XP_031083543.1/XP_031081869.1	6
BP	GO:0009749	response to glucose	6/358	20/3915	0.00717289	0.967231	0.967231	XP_031075320.1/XP_031077138.1/XP_031080828.1/XP_031083630.1/XP_031083543.1/XP_031081869.1	6
BP	GO:0034284	response to monosaccharide	6/358	20/3915	0.00717289	0.967231	0.967231	XP_031075320.1/XP_031077138.1/XP_031080828.1/XP_031083630.1/XP_031083543.1/XP_031081869.1	6
BP	GO:0019748	secondary metabolic process	11/358	54/3915	0.00837611	0.967231	0.967231	XP_031076272.1/XP_031075541.1/XP_031074564.1/XP_031074392.1/XP_031077249.1/XP_031079696.1/XP_031078929.1/XP_031078776.1/XP_031083699.1/XP_031081891.1/XP_031088960.1	11
CC	GO:0071006	U2-type catalytic step 1 spliceosome	4/343	10/3769	0.00908492	0.574167	0.574167	XP_031075829.1/XP_031074579.1/XP_031079389.1/XP_031087959.1	4
CC	GO:0071012	catalytic step 1 spliceosome	4/343	10/3769	0.00908492	0.574167	0.574167	XP_031075829.1/XP_031074579.1/XP_031079389.1/XP_031087959.1	4
BP	GO:0071322	cellular response to carbohydrate stimulus	6/358	21/3915	0.0092856	0.967231	0.967231	XP_031075320.1/XP_031077138.1/XP_031080828.1/XP_031083630.1/XP_031083543.1/XP_031081869.1	6
BP	GO:0032787	monocarboxylic acid metabolic process	26/358	177/3915	0.00937497	0.967231	0.967231	XP_031076323.1/XP_031076272.1/XP_031075967.1/XP_031075629.1/XP_031075541.1/XP_031074995.1/XP_031074564.1/XP_031077989.1/XP_031077988.1/XP_031077325.1/XP_031077138.1/XP_031080038.1/XP_031079702.1/XP_031079474.1/XP_031079062.1/XP_031079008.1/XP_031078507.1/XP_031083566.1/XP_031083555.1/XP_031087533.1/XP_031089689.1/XP_031083003.1/XP_031081700.1/XP_031081891.1/XP_031086811.1/XP_031086048.1	26
BP	GO:0010972	negative regulation of G2/M transition of mitotic cell cycle	9/358	41/3915	0.0101083	0.967231	0.967231	XP_031076045.1/XP_031075390.1/XP_031075320.1/XP_031074765.1/XP_031083571.1/XP_031087419.1/XP_031087601.1/XP_031083242.1/XP_031088119.1	9
BP	GO:1902750	negative regulation of cell cycle G2/M phase transition	9/358	41/3915	0.0101083	0.967231	0.967231	XP_031076045.1/XP_031075390.1/XP_031075320.1/XP_031074765.1/XP_031083571.1/XP_031087419.1/XP_031087601.1/XP_031083242.1/XP_031088119.1	9
BP	GO:1900376	regulation of secondary metabolite biosynthetic process	5/358	16/3915	0.0116318	0.967231	0.967231	XP_031076272.1/XP_031075541.1/XP_031077249.1/XP_031083699.1/XP_031081891.1	5
BP	GO:0000727	double-strand break repair via break-induced replication	6/358	22/3915	0.0118079	0.967231	0.967231	XP_031076249.1/XP_031077200.1/XP_031083817.1/XP_031087419.1/XP_031087542.1/XP_031086974.1	6
BP	GO:0046839	phospholipid dephosphorylation	4/358	11/3915	0.013496	0.967231	0.967231	XP_031075768.1/XP_031079482.1/XP_031084047.1/XP_031087961.1	4
MF	GO:0008081	phosphoric diester hydrolase activity	4/310	11/3385	0.013545	0.930832	0.930832	XP_031076028.1/XP_031080828.1/XP_031087352.1/XP_031082731.1	4
MF	GO:0000976	transcription cis-regulatory region binding	14/310	81/3385	0.0138384	0.930832	0.930832	XP_031075846.1/XP_031075534.1/XP_031077988.1/XP_031077249.1/XP_031077076.1/XP_031076726.1/XP_031080771.1/XP_031084058.1/XP_031083555.1/XP_031082859.1/XP_031082916.1/XP_031083027.1/XP_031088031.1/XP_031088297.1	14
BP	GO:0033865	nucleoside bisphosphate metabolic process	8/358	36/3915	0.0139391	0.967231	0.967231	XP_031076323.1/XP_031077889.1/XP_031077586.1/XP_031079474.1/XP_031089689.1/XP_031081674.1/XP_031082090.1/XP_031086048.1	8
BP	GO:0033875	ribonucleoside bisphosphate metabolic process	8/358	36/3915	0.0139391	0.967231	0.967231	XP_031076323.1/XP_031077889.1/XP_031077586.1/XP_031079474.1/XP_031089689.1/XP_031081674.1/XP_031082090.1/XP_031086048.1	8
BP	GO:0034032	purine nucleoside bisphosphate metabolic process	8/358	36/3915	0.0139391	0.967231	0.967231	XP_031076323.1/XP_031077889.1/XP_031077586.1/XP_031079474.1/XP_031089689.1/XP_031081674.1/XP_031082090.1/XP_031086048.1	8
BP	GO:0001678	cellular glucose homeostasis	6/358	23/3915	0.0147769	0.967231	0.967231	XP_031075320.1/XP_031077138.1/XP_031080828.1/XP_031083630.1/XP_031083543.1/XP_031081869.1	6
BP	GO:0009743	response to carbohydrate	6/358	23/3915	0.0147769	0.967231	0.967231	XP_031075320.1/XP_031077138.1/XP_031080828.1/XP_031083630.1/XP_031083543.1/XP_031081869.1	6
BP	GO:0017000	antibiotic biosynthetic process	5/358	17/3915	0.0152702	0.967231	0.967231	XP_031076272.1/XP_031075541.1/XP_031079062.1/XP_031081891.1/XP_031086811.1	5
BP	GO:0043455	regulation of secondary metabolic process	5/358	17/3915	0.0152702	0.967231	0.967231	XP_031076272.1/XP_031075541.1/XP_031077249.1/XP_031083699.1/XP_031081891.1	5
BP	GO:0033500	carbohydrate homeostasis	6/358	24/3915	0.0182275	0.967231	0.967231	XP_031075320.1/XP_031077138.1/XP_031080828.1/XP_031083630.1/XP_031083543.1/XP_031081869.1	6
BP	GO:0042593	glucose homeostasis	6/358	24/3915	0.0182275	0.967231	0.967231	XP_031075320.1/XP_031077138.1/XP_031080828.1/XP_031083630.1/XP_031083543.1/XP_031081869.1	6
BP	GO:0006163	purine nucleotide metabolic process	18/358	117/3915	0.0183219	0.967231	0.967231	XP_031076323.1/XP_031075911.1/XP_031075629.1/XP_031074933.1/XP_031077889.1/XP_031077586.1/XP_031077138.1/XP_031080828.1/XP_031079702.1/XP_031079474.1/XP_031079062.1/XP_031089689.1/XP_031083026.1/XP_031081426.1/XP_031081674.1/XP_031082090.1/XP_031086811.1/XP_031086048.1	18
BP	GO:0022604	regulation of cell morphogenesis	12/358	68/3915	0.0187079	0.967231	0.967231	XP_031075193.1/XP_031075082.1/XP_031074938.1/XP_031077816.1/XP_031080695.1/XP_031080861.1/XP_031084047.1/XP_031083630.1/XP_031082939.1/XP_031083015.1/XP_031081814.1/XP_031081869.1	12
MF	GO:0042578	phosphoric ester hydrolase activity	14/310	84/3385	0.0187486	0.930832	0.930832	XP_031076028.1/XP_031075768.1/XP_031075390.1/XP_031075086.1/XP_031077979.1/XP_031079991.1/XP_031080695.1/XP_031080734.1/XP_031080828.1/XP_031079482.1/XP_031087352.1/XP_031082436.1/XP_031082731.1/XP_031087961.1	14
BP	GO:0010528	regulation of transposition	4/358	12/3915	0.0188111	0.967231	0.967231	XP_031080570.1/XP_031087411.1/XP_031086938.1/XP_031089003.1	4
BP	GO:1900378	positive regulation of secondary metabolite biosynthetic process	4/358	12/3915	0.0188111	0.967231	0.967231	XP_031076272.1/XP_031075541.1/XP_031083699.1/XP_031081891.1	4
BP	GO:0006383	transcription by RNA polymerase III	8/358	38/3915	0.0191864	0.967231	0.967231	XP_031075320.1/XP_031075096.1/XP_031074932.1/XP_031080570.1/XP_031080771.1/XP_031079601.1/XP_031082859.1/XP_031088297.1	8
BP	GO:0016999	antibiotic metabolic process	12/358	69/3915	0.0208477	0.967231	0.967231	XP_031076272.1/XP_031075541.1/XP_031074564.1/XP_031078049.1/XP_031079474.1/XP_031079062.1/XP_031078792.1/XP_031078697.1/XP_031087527.1/XP_031081891.1/XP_031082090.1/XP_031086811.1	12
MF	GO:0000987	cis-regulatory region sequence-specific DNA binding	12/310	69/3385	0.0209122	0.930832	0.930832	XP_031075846.1/XP_031077988.1/XP_031077249.1/XP_031077076.1/XP_031076726.1/XP_031084058.1/XP_031083555.1/XP_031082859.1/XP_031082916.1/XP_031083027.1/XP_031088031.1/XP_031088297.1	12
BP	GO:0006082	organic acid metabolic process	52/358	435/3915	0.0219596	0.967231	0.967231	XP_031076323.1/XP_031076272.1/XP_031075982.1/XP_031075967.1/XP_031075775.1/XP_031075629.1/XP_031075541.1/XP_031075268.1/XP_031075183.1/XP_031075015.1/XP_031074995.1/XP_031074813.1/XP_031074564.1/XP_031078049.1/XP_031077989.1/XP_031077988.1/XP_031077623.1/XP_031077592.1/XP_031077586.1/XP_031077325.1/XP_031077257.1/XP_031077235.1/XP_031077138.1/XP_031076636.1/XP_031079936.1/XP_031080038.1/XP_031080…	52
MF	GO:0003690	double-stranded DNA binding	23/310	164/3385	0.0235485	0.930832	0.930832	XP_031076249.1/XP_031075846.1/XP_031075829.1/XP_031075534.1/XP_031077988.1/XP_031077249.1/XP_031077200.1/XP_031077076.1/XP_031076726.1/XP_031080771.1/XP_031084058.1/XP_031083817.1/XP_031083772.1/XP_031083571.1/XP_031083555.1/XP_031087542.1/XP_031087641.1/XP_031082859.1/XP_031082916.1/XP_031083027.1/XP_031086974.1/XP_031088031.1/XP_031088297.1	23
BP	GO:0022618	ribonucleoprotein complex assembly	23/358	164/3915	0.0235809	0.967231	0.967231	XP_031075829.1/XP_031075769.1/XP_031075508.1/XP_031074579.1/XP_031077900.1/XP_031077760.1/XP_031077753.1/XP_031077730.1/XP_031077225.1/XP_031080202.1/XP_031080493.1/XP_031080598.1/XP_031080834.1/XP_031079389.1/XP_031079223.1/XP_031079174.1/XP_031087711.1/XP_031089703.1/XP_031082451.1/XP_031081872.1/XP_031087072.1/XP_031087959.1/XP_031088194.1	23
BP	GO:0072521	purine-containing compound metabolic process	20/358	138/3915	0.0243956	0.967231	0.967231	XP_031076323.1/XP_031075911.1/XP_031075629.1/XP_031074933.1/XP_031077889.1/XP_031077586.1/XP_031077385.1/XP_031077138.1/XP_031080828.1/XP_031079702.1/XP_031079474.1/XP_031079062.1/XP_031089689.1/XP_031082436.1/XP_031083026.1/XP_031081426.1/XP_031081674.1/XP_031082090.1/XP_031086811.1/XP_031086048.1	20
BP	GO:0072329	monocarboxylic acid catabolic process	10/358	55/3915	0.0252164	0.967231	0.967231	XP_031076323.1/XP_031075629.1/XP_031074995.1/XP_031074564.1/XP_031077989.1/XP_031077988.1/XP_031078507.1/XP_031083003.1/XP_031081700.1/XP_031086048.1	10
MF	GO:0016895	exodeoxyribonuclease activity, producing 5'-phosphomonoesters	4/310	13/3385	0.0253462	0.930832	0.930832	XP_031076249.1/XP_031075200.1/XP_031077189.1/XP_031082064.1	4
BP	GO:0032989	cellular component morphogenesis	12/358	71/3915	0.0256655	0.967231	0.967231	XP_031075193.1/XP_031075082.1/XP_031077816.1/XP_031077613.1/XP_031077288.1/XP_031080222.1/XP_031080315.1/XP_031083732.1/XP_031083630.1/XP_031081814.1/XP_031081977.1/XP_031088783.1	12
BP	GO:0044773	mitotic DNA damage checkpoint signaling	7/358	33/3915	0.0267294	0.967231	0.967231	XP_031076249.1/XP_031076045.1/XP_031077760.1/XP_031079334.1/XP_031083571.1/XP_031087419.1/XP_031088119.1	7
CC	GO:0005684	U2-type spliceosomal complex	11/343	64/3769	0.0276242	0.93465	0.93465	XP_031075829.1/XP_031075769.1/XP_031075383.1/XP_031074579.1/XP_031077430.1/XP_031080202.1/XP_031079389.1/XP_031082451.1/XP_031087072.1/XP_031087959.1/XP_031088315.1	11
MF	GO:1990837	sequence-specific double-stranded DNA binding	18/310	123/3385	0.0291742	0.930832	0.930832	XP_031075846.1/XP_031075829.1/XP_031075534.1/XP_031077988.1/XP_031077249.1/XP_031077200.1/XP_031077076.1/XP_031076726.1/XP_031080771.1/XP_031084058.1/XP_031083555.1/XP_031087542.1/XP_031082859.1/XP_031082916.1/XP_031083027.1/XP_031086974.1/XP_031088031.1/XP_031088297.1	18
BP	GO:0009150	purine ribonucleotide metabolic process	17/358	115/3915	0.0306461	0.967231	0.967231	XP_031076323.1/XP_031075629.1/XP_031074933.1/XP_031077889.1/XP_031077586.1/XP_031077138.1/XP_031080828.1/XP_031079702.1/XP_031079474.1/XP_031079062.1/XP_031089689.1/XP_031083026.1/XP_031081426.1/XP_031081674.1/XP_031082090.1/XP_031086811.1/XP_031086048.1	17
BP	GO:0043436	oxoacid metabolic process	51/358	434/3915	0.0309916	0.967231	0.967231	XP_031076323.1/XP_031076272.1/XP_031075982.1/XP_031075967.1/XP_031075775.1/XP_031075629.1/XP_031075541.1/XP_031075268.1/XP_031075183.1/XP_031075015.1/XP_031074995.1/XP_031074813.1/XP_031074564.1/XP_031078049.1/XP_031077989.1/XP_031077988.1/XP_031077623.1/XP_031077592.1/XP_031077325.1/XP_031077257.1/XP_031077235.1/XP_031077138.1/XP_031076636.1/XP_031079936.1/XP_031080038.1/XP_031080117.1/XP_031080…	51
MF	GO:0016874	ligase activity	15/310	98/3385	0.0311441	0.930832	0.930832	XP_031075967.1/XP_031075775.1/XP_031075015.1/XP_031074813.1/XP_031077235.1/XP_031077072.1/XP_031076636.1/XP_031079936.1/XP_031080661.1/XP_031079500.1/XP_031083566.1/XP_031087352.1/XP_031083026.1/XP_031082090.1/XP_031087977.1	15
BP	GO:0006892	post-Golgi vesicle-mediated transport	12/358	73/3915	0.0312517	0.967231	0.967231	XP_031075417.1/XP_031077307.1/XP_031079951.1/XP_031080038.1/XP_031080222.1/XP_031080315.1/XP_031080598.1/XP_031079142.1/XP_031079008.1/XP_031087591.1/XP_031081977.1/XP_031087019.1	12
BP	GO:0009303	rRNA transcription	6/358	27/3915	0.0317739	0.967231	0.967231	XP_031077753.1/XP_031080635.1/XP_031079601.1/XP_031082859.1/XP_031081705.1/XP_031088031.1	6
BP	GO:0010565	regulation of cellular ketone metabolic process	6/358	27/3915	0.0317739	0.967231	0.967231	XP_031076272.1/XP_031075541.1/XP_031079008.1/XP_031083555.1/XP_031082916.1/XP_031081891.1	6
BP	GO:0031048	small non-coding RNA-dependent heterochromatin formation	6/358	27/3915	0.0317739	0.967231	0.967231	XP_031075968.1/XP_031075779.1/XP_031080695.1/XP_031082893.1/XP_031081529.1/XP_031081872.1	6
BP	GO:0009756	carbohydrate mediated signaling	4/358	14/3915	0.0328723	0.967231	0.967231	XP_031075320.1/XP_031080828.1/XP_031083630.1/XP_031083543.1	4
BP	GO:0009757	hexose mediated signaling	4/358	14/3915	0.0328723	0.967231	0.967231	XP_031075320.1/XP_031080828.1/XP_031083630.1/XP_031083543.1	4
BP	GO:0010182	sugar mediated signaling pathway	4/358	14/3915	0.0328723	0.967231	0.967231	XP_031075320.1/XP_031080828.1/XP_031083630.1/XP_031083543.1	4
BP	GO:0010255	glucose mediated signaling pathway	4/358	14/3915	0.0328723	0.967231	0.967231	XP_031075320.1/XP_031080828.1/XP_031083630.1/XP_031083543.1	4
BP	GO:0072396	response to cell cycle checkpoint signaling	4/358	14/3915	0.0328723	0.967231	0.967231	XP_031076045.1/XP_031075390.1/XP_031077189.1/XP_031083571.1	4
MF	GO:0004529	exodeoxyribonuclease activity	4/310	14/3385	0.0329905	0.930832	0.930832	XP_031076249.1/XP_031075200.1/XP_031077189.1/XP_031082064.1	4
CC	GO:0005741	mitochondrial outer membrane	12/343	74/3769	0.0332044	0.93465	0.93465	XP_031075660.1/XP_031077291.1/XP_031077072.1/XP_031080605.1/XP_031079610.1/XP_031078906.1/XP_031087564.1/XP_031082513.1/XP_031082994.1/XP_031083105.1/XP_031088318.1/XP_031085254.1	12
CC	GO:0019867	outer membrane	12/343	74/3769	0.0332044	0.93465	0.93465	XP_031075660.1/XP_031077291.1/XP_031077072.1/XP_031080605.1/XP_031079610.1/XP_031078906.1/XP_031087564.1/XP_031082513.1/XP_031082994.1/XP_031083105.1/XP_031088318.1/XP_031085254.1	12
CC	GO:0031968	organelle outer membrane	12/343	74/3769	0.0332044	0.93465	0.93465	XP_031075660.1/XP_031077291.1/XP_031077072.1/XP_031080605.1/XP_031079610.1/XP_031078906.1/XP_031087564.1/XP_031082513.1/XP_031082994.1/XP_031083105.1/XP_031088318.1/XP_031085254.1	12
BP	GO:0000077	DNA damage checkpoint signaling	8/358	42/3915	0.0336421	0.967231	0.967231	XP_031076249.1/XP_031076045.1/XP_031077760.1/XP_031080695.1/XP_031079334.1/XP_031083571.1/XP_031087419.1/XP_031088119.1	8
BP	GO:0044550	secondary metabolite biosynthetic process	8/358	42/3915	0.0336421	0.967231	0.967231	XP_031076272.1/XP_031075541.1/XP_031074564.1/XP_031077249.1/XP_031078776.1/XP_031083699.1/XP_031081891.1/XP_031088960.1	8
BP	GO:0000902	cell morphogenesis	13/358	83/3915	0.036476	0.967231	0.967231	XP_031075193.1/XP_031075082.1/XP_031074938.1/XP_031077816.1/XP_031080222.1/XP_031080695.1/XP_031080861.1/XP_031084047.1/XP_031083630.1/XP_031082939.1/XP_031083015.1/XP_031081814.1/XP_031081869.1	13
BP	GO:0006734	NADH metabolic process	5/358	21/3915	0.0371093	0.967231	0.967231	XP_031077138.1/XP_031079702.1/XP_031082860.1/XP_031086811.1/XP_031085254.1	5
MF	GO:0000977	RNA polymerase II transcription regulatory region sequence-specific DNA binding	12/310	75/3385	0.0378024	0.930832	0.930832	XP_031075846.1/XP_031075534.1/XP_031077988.1/XP_031077249.1/XP_031077076.1/XP_031076726.1/XP_031084058.1/XP_031083555.1/XP_031082859.1/XP_031082916.1/XP_031083027.1/XP_031088031.1	12
BP	GO:0042770	signal transduction in response to DNA damage	8/358	43/3915	0.038171	0.967231	0.967231	XP_031076249.1/XP_031076045.1/XP_031077760.1/XP_031080695.1/XP_031079334.1/XP_031083571.1/XP_031087419.1/XP_031088119.1	8
BP	GO:0019752	carboxylic acid metabolic process	49/358	420/3915	0.0383329	0.967231	0.967231	XP_031076323.1/XP_031076272.1/XP_031075967.1/XP_031075775.1/XP_031075629.1/XP_031075541.1/XP_031075268.1/XP_031075183.1/XP_031075015.1/XP_031074995.1/XP_031074813.1/XP_031074564.1/XP_031078049.1/XP_031077989.1/XP_031077988.1/XP_031077623.1/XP_031077592.1/XP_031077325.1/XP_031077257.1/XP_031077235.1/XP_031077138.1/XP_031076636.1/XP_031079936.1/XP_031080038.1/XP_031080117.1/XP_031080639.1/XP_031080…	49
BP	GO:0009259	ribonucleotide metabolic process	18/358	127/3915	0.0386183	0.967231	0.967231	XP_031076323.1/XP_031075629.1/XP_031074933.1/XP_031077889.1/XP_031077656.1/XP_031077586.1/XP_031077138.1/XP_031080828.1/XP_031079702.1/XP_031079474.1/XP_031079062.1/XP_031089689.1/XP_031083026.1/XP_031081426.1/XP_031081674.1/XP_031082090.1/XP_031086811.1/XP_031086048.1	18
BP	GO:0016192	vesicle-mediated transport	42/358	352/3915	0.0389798	0.967231	0.967231	XP_031076272.1/XP_031075541.1/XP_031075417.1/XP_031075385.1/XP_031075356.1/XP_031075057.1/XP_031077816.1/XP_031077613.1/XP_031077596.1/XP_031077307.1/XP_031077288.1/XP_031076958.1/XP_031079951.1/XP_031080038.1/XP_031080180.1/XP_031080190.1/XP_031080222.1/XP_031080315.1/XP_031080598.1/XP_031080871.1/XP_031079517.1/XP_031079179.1/XP_031079142.1/XP_031079045.1/XP_031079008.1/XP_031084018.1/XP_031083…	42
MF	GO:0140098	catalytic activity, acting on RNA	26/310	200/3385	0.0393814	0.930832	0.930832	XP_031075775.1/XP_031075383.1/XP_031075096.1/XP_031075017.1/XP_031075015.1/XP_031074813.1/XP_031077200.1/XP_031077072.1/XP_031076636.1/XP_031079936.1/XP_031080153.1/XP_031080712.1/XP_031080826.1/XP_031080834.1/XP_031079500.1/XP_031079462.1/XP_031079223.1/XP_031084345.1/XP_031087352.1/XP_031087361.1/XP_031087711.1/XP_031089703.1/XP_031081550.1/XP_031081705.1/XP_031082064.1/XP_031086923.1	26
BP	GO:0071826	ribonucleoprotein complex subunit organization	23/358	173/3915	0.0408578	0.967231	0.967231	XP_031075829.1/XP_031075769.1/XP_031075508.1/XP_031074579.1/XP_031077900.1/XP_031077760.1/XP_031077753.1/XP_031077730.1/XP_031077225.1/XP_031080202.1/XP_031080493.1/XP_031080598.1/XP_031080834.1/XP_031079389.1/XP_031079223.1/XP_031079174.1/XP_031087711.1/XP_031089703.1/XP_031082451.1/XP_031081872.1/XP_031087072.1/XP_031087959.1/XP_031088194.1	23
BP	GO:0000725	recombinational repair	12/358	76/3915	0.0411957	0.967231	0.967231	XP_031076249.1/XP_031077200.1/XP_031079022.1/XP_031083817.1/XP_031087411.1/XP_031087419.1/XP_031087533.1/XP_031087542.1/XP_031087641.1/XP_031082989.1/XP_031086974.1/XP_031088119.1	12
BP	GO:0015803	branched-chain amino acid transport	4/358	15/3915	0.0416872	0.967231	0.967231	XP_031080123.1/XP_031079319.1/XP_031087632.1/XP_031085409.1	4
BP	GO:0019933	cAMP-mediated signaling	4/358	15/3915	0.0416872	0.967231	0.967231	XP_031075320.1/XP_031080828.1/XP_031083543.1/XP_031081869.1	4
BP	GO:0019935	cyclic-nucleotide-mediated signaling	4/358	15/3915	0.0416872	0.967231	0.967231	XP_031075320.1/XP_031080828.1/XP_031083543.1/XP_031081869.1	4
BP	GO:0033238	regulation of cellular amine metabolic process	4/358	15/3915	0.0416872	0.967231	0.967231	XP_031076272.1/XP_031075541.1/XP_031082916.1/XP_031081891.1	4
BP	GO:0043385	mycotoxin metabolic process	4/358	15/3915	0.0416872	0.967231	0.967231	XP_031074564.1/XP_031074392.1/XP_031078929.1/XP_031083699.1	4
MF	GO:0004722	protein serine/threonine phosphatase activity	4/310	15/3385	0.0418364	0.930832	0.930832	XP_031075390.1/XP_031075086.1/XP_031079991.1/XP_031080695.1	4
BP	GO:0010927	cellular component assembly involved in morphogenesis	8/358	44/3915	0.0430916	0.967231	0.967231	XP_031075082.1/XP_031077613.1/XP_031077288.1/XP_031080315.1/XP_031083732.1/XP_031081814.1/XP_031081977.1/XP_031088783.1	8
BP	GO:0034404	nucleobase-containing small molecule biosynthetic process	8/358	44/3915	0.0430916	0.967231	0.967231	XP_031075629.1/XP_031075120.1/XP_031077656.1/XP_031077138.1/XP_031080828.1/XP_031079702.1/XP_031082436.1/XP_031083026.1	8
BP	GO:0006637	acyl-CoA metabolic process	6/358	29/3915	0.04371	0.967231	0.967231	XP_031076323.1/XP_031077586.1/XP_031079474.1/XP_031089689.1/XP_031082090.1/XP_031086048.1	6
BP	GO:0035383	thioester metabolic process	6/358	29/3915	0.04371	0.967231	0.967231	XP_031076323.1/XP_031077586.1/XP_031079474.1/XP_031089689.1/XP_031082090.1/XP_031086048.1	6
BP	GO:0006101	citrate metabolic process	5/358	22/3915	0.0445508	0.967231	0.967231	XP_031074564.1/XP_031078049.1/XP_031079474.1/XP_031087527.1/XP_031082090.1	5
BP	GO:0006376	mRNA splice site selection	5/358	22/3915	0.0445508	0.967231	0.967231	XP_031075769.1/XP_031074579.1/XP_031080202.1/XP_031089703.1/XP_031087072.1	5
BP	GO:0072350	tricarboxylic acid metabolic process	5/358	22/3915	0.0445508	0.967231	0.967231	XP_031074564.1/XP_031078049.1/XP_031079474.1/XP_031087527.1/XP_031082090.1	5
BP	GO:0060341	regulation of cellular localization	15/358	103/3915	0.0457323	0.967231	0.967231	XP_031076272.1/XP_031075390.1/XP_031075320.1/XP_031075082.1/XP_031074765.1/XP_031077816.1/XP_031080695.1/XP_031084047.1/XP_031083630.1/XP_031083543.1/XP_031089703.1/XP_031083242.1/XP_031081814.1/XP_031086970.1/XP_031085409.1	15
BP	GO:1901991	negative regulation of mitotic cell cycle phase transition	13/358	86/3915	0.0468435	0.967231	0.967231	XP_031076045.1/XP_031075390.1/XP_031075320.1/XP_031074765.1/XP_031077760.1/XP_031080123.1/XP_031080695.1/XP_031079334.1/XP_031083571.1/XP_031087419.1/XP_031087601.1/XP_031083242.1/XP_031088119.1	13
BP	GO:0034250	positive regulation of cellular amide metabolic process	7/358	37/3915	0.047066	0.967231	0.967231	XP_031076272.1/XP_031075541.1/XP_031080493.1/XP_031083956.1/XP_031087352.1/XP_031087729.1/XP_031081891.1	7
BP	GO:0046434	organophosphate catabolic process	7/358	37/3915	0.047066	0.967231	0.967231	XP_031076028.1/XP_031075629.1/XP_031075120.1/XP_031077979.1/XP_031077138.1/XP_031080828.1/XP_031079702.1	7
BP	GO:0032386	regulation of intracellular transport	8/358	45/3915	0.048414	0.967231	0.967231	XP_031076272.1/XP_031077816.1/XP_031084047.1/XP_031083543.1/XP_031089703.1/XP_031083242.1/XP_031081814.1/XP_031086970.1	8
BP	GO:0019932	second-messenger-mediated signaling	6/358	30/3915	0.0506016	0.967231	0.967231	XP_031075320.1/XP_031080828.1/XP_031079482.1/XP_031083543.1/XP_031081869.1/XP_031088871.1	6
CC	GO:0000974	Prp19 complex	4/343	16/3769	0.0509258	0.93465	0.93465	XP_031075829.1/XP_031074579.1/XP_031079389.1/XP_031087959.1	4
CC	GO:0005685	U1 snRNP	4/343	16/3769	0.0509258	0.93465	0.93465	XP_031075769.1/XP_031077430.1/XP_031080202.1/XP_031087072.1	4
CC	GO:0098799	outer mitochondrial membrane protein complex	4/343	16/3769	0.0509258	0.93465	0.93465	XP_031080605.1/XP_031087564.1/XP_031082513.1/XP_031083105.1	4
BP	GO:0000083	regulation of transcription involved in G1/S transition of mitotic cell cycle	4/358	16/3915	0.0517057	0.967231	0.967231	XP_031080635.1/XP_031080895.1/XP_031084058.1/XP_031088031.1	4
BP	GO:0071216	cellular response to biotic stimulus	4/358	16/3915	0.0517057	0.967231	0.967231	XP_031076045.1/XP_031075390.1/XP_031077189.1/XP_031083571.1	4
BP	GO:1901615	organic hydroxy compound metabolic process	20/358	150/3915	0.0528262	0.967231	0.967231	XP_031078049.1/XP_031077989.1/XP_031077988.1/XP_031077979.1/XP_031077765.1/XP_031077586.1/XP_031080665.1/XP_031080734.1/XP_031080872.1/XP_031080879.1/XP_031079062.1/XP_031078776.1/XP_031078507.1/XP_031083572.1/XP_031083003.1/XP_031086574.1/XP_031086811.1/XP_031088960.1/XP_031088206.1/XP_031085254.1	20
BP	GO:0044042	glucan metabolic process	9/358	54/3915	0.053718	0.967231	0.967231	XP_031075883.1/XP_031075779.1/XP_031075429.1/XP_031080514.1/XP_031080695.1/XP_031078995.1/XP_031083732.1/XP_031081814.1/XP_031088982.1	9
MF	GO:0003697	single-stranded DNA binding	8/310	46/3385	0.0543754	0.930832	0.930832	XP_031076249.1/XP_031075508.1/XP_031077603.1/XP_031077200.1/XP_031083817.1/XP_031087729.1/XP_031082989.1/XP_031083027.1	8
CC	GO:0005637	nuclear inner membrane	3/343	10/3769	0.0553264	0.93465	0.93465	XP_031075215.1/XP_031079610.1/XP_031087352.1	3
CC	GO:0043614	multi-eIF complex	3/343	10/3769	0.0553264	0.93465	0.93465	XP_031077900.1/XP_031077760.1/XP_031080493.1	3
CC	GO:0080008	Cul4-RING E3 ubiquitin ligase complex	3/343	10/3769	0.0553264	0.93465	0.93465	XP_031076000.1/XP_031075968.1/XP_031089054.1	3
BP	GO:2000241	regulation of reproductive process	20/358	151/3915	0.0559617	0.967231	0.967231	XP_031076045.1/XP_031075968.1/XP_031075320.1/XP_031075193.1/XP_031075082.1/XP_031074765.1/XP_031077854.1/XP_031080222.1/XP_031080598.1/XP_031079610.1/XP_031084058.1/XP_031083817.1/XP_031083543.1/XP_031087641.1/XP_031082799.1/XP_031082916.1/XP_031081471.1/XP_031081814.1/XP_031081869.1/XP_031088031.1	20
BP	GO:0001731	formation of translation preinitiation complex	3/358	10/3915	0.0560058	0.967231	0.967231	XP_031077760.1/XP_031080493.1/XP_031088194.1	3
BP	GO:0007189	adenylate cyclase-activating G protein-coupled receptor signaling pathway	3/358	10/3915	0.0560058	0.967231	0.967231	XP_031075320.1/XP_031080828.1/XP_031083543.1	3
BP	GO:0032456	endocytic recycling	3/358	10/3915	0.0560058	0.967231	0.967231	XP_031079951.1/XP_031080598.1/XP_031087019.1	3
BP	GO:0033240	positive regulation of cellular amine metabolic process	3/358	10/3915	0.0560058	0.967231	0.967231	XP_031076272.1/XP_031075541.1/XP_031081891.1	3
BP	GO:0046856	phosphatidylinositol dephosphorylation	3/358	10/3915	0.0560058	0.967231	0.967231	XP_031075768.1/XP_031084047.1/XP_031087961.1	3
BP	GO:0061413	regulation of transcription from RNA polymerase II promoter by a nonfermentable carbon source	3/358	10/3915	0.0560058	0.967231	0.967231	XP_031077988.1/XP_031076726.1/XP_031083555.1	3
BP	GO:0061414	positive regulation of transcription from RNA polymerase II promoter by a nonfermentable carbon source	3/358	10/3915	0.0560058	0.967231	0.967231	XP_031077988.1/XP_031076726.1/XP_031083555.1	3
BP	GO:0072402	response to DNA integrity checkpoint signaling	3/358	10/3915	0.0560058	0.967231	0.967231	XP_031076045.1/XP_031077189.1/XP_031083571.1	3
BP	GO:0072423	response to DNA damage checkpoint signaling	3/358	10/3915	0.0560058	0.967231	0.967231	XP_031076045.1/XP_031077189.1/XP_031083571.1	3
BP	GO:1901409	positive regulation of phosphorylation of RNA polymerase II C-terminal domain	3/358	10/3915	0.0560058	0.967231	0.967231	XP_031077753.1/XP_031080635.1/XP_031081471.1	3
MF	GO:0008409	5'-3' exonuclease activity	3/310	10/3385	0.0561807	0.930832	0.930832	XP_031075200.1/XP_031077189.1/XP_031082064.1	3
MF	GO:0016884	carbon-nitrogen ligase activity, with glutamine as amido-N-donor	3/310	10/3385	0.0561807	0.930832	0.930832	XP_031077235.1/XP_031083566.1/XP_031083026.1	3
BP	GO:0008360	regulation of cell shape	10/358	63/3915	0.0576035	0.967231	0.967231	XP_031075082.1/XP_031074938.1/XP_031080695.1/XP_031080861.1/XP_031084047.1/XP_031083630.1/XP_031082939.1/XP_031083015.1/XP_031081814.1/XP_031081869.1	10
CC	GO:0055029	nuclear DNA-directed RNA polymerase complex	11/343	72/3769	0.0586488	0.93465	0.93465	XP_031075808.1/XP_031075096.1/XP_031074932.1/XP_031077753.1/XP_031077424.1/XP_031080635.1/XP_031082859.1/XP_031081705.1/XP_031086838.1/XP_031089003.1/XP_031087981.1	11
MF	GO:0016765	transferase activity, transferring alkyl or aryl (other than methyl) groups	8/310	47/3385	0.0605533	0.930832	0.930832	XP_031075268.1/XP_031077989.1/XP_031077623.1/XP_031080190.1/XP_031080639.1/XP_031080665.1/XP_031078776.1/XP_031083060.1	8
BP	GO:0000022	mitotic spindle elongation	5/358	24/3915	0.061925	0.967231	0.967231	XP_031075390.1/XP_031074871.1/XP_031080695.1/XP_031087601.1/XP_031083242.1	5
BP	GO:0009166	nucleotide catabolic process	5/358	24/3915	0.061925	0.967231	0.967231	XP_031075629.1/XP_031075120.1/XP_031077138.1/XP_031080828.1/XP_031079702.1	5
BP	GO:0051231	spindle elongation	5/358	24/3915	0.061925	0.967231	0.967231	XP_031075390.1/XP_031074871.1/XP_031080695.1/XP_031087601.1/XP_031083242.1	5
BP	GO:0000289	nuclear-transcribed mRNA poly(A) tail shortening	4/358	17/3915	0.0629166	0.967231	0.967231	XP_031077854.1/XP_031077291.1/XP_031076955.1/XP_031082412.1	4
BP	GO:0031396	regulation of protein ubiquitination	4/358	17/3915	0.0629166	0.967231	0.967231	XP_031077753.1/XP_031080635.1/XP_031087641.1/XP_031082013.1	4
BP	GO:0033866	nucleoside bisphosphate biosynthetic process	4/358	17/3915	0.0629166	0.967231	0.967231	XP_031077889.1/XP_031079474.1/XP_031089689.1/XP_031081674.1	4
BP	GO:0034030	ribonucleoside bisphosphate biosynthetic process	4/358	17/3915	0.0629166	0.967231	0.967231	XP_031077889.1/XP_031079474.1/XP_031089689.1/XP_031081674.1	4
BP	GO:0034033	purine nucleoside bisphosphate biosynthetic process	4/358	17/3915	0.0629166	0.967231	0.967231	XP_031077889.1/XP_031079474.1/XP_031089689.1/XP_031081674.1	4
BP	GO:0042790	nucleolar large rRNA transcription by RNA polymerase I	4/358	17/3915	0.0629166	0.967231	0.967231	XP_031077753.1/XP_031080635.1/XP_031082859.1/XP_031081705.1	4
CC	GO:0000428	DNA-directed RNA polymerase complex	11/343	73/3769	0.063697	0.93465	0.93465	XP_031075808.1/XP_031075096.1/XP_031074932.1/XP_031077753.1/XP_031077424.1/XP_031080635.1/XP_031082859.1/XP_031081705.1/XP_031086838.1/XP_031089003.1/XP_031087981.1	11
BP	GO:0006310	DNA recombination	18/358	135/3915	0.0640337	0.967231	0.967231	XP_031076249.1/XP_031077753.1/XP_031077603.1/XP_031077200.1/XP_031080635.1/XP_031079022.1/XP_031083817.1/XP_031087411.1/XP_031087419.1/XP_031087533.1/XP_031087542.1/XP_031087641.1/XP_031082671.1/XP_031082989.1/XP_031086974.1/XP_031089003.1/XP_031088031.1/XP_031088119.1	18
CC	GO:0071004	U2-type prespliceosome	6/343	32/3769	0.065	0.93465	0.93465	XP_031075829.1/XP_031075769.1/XP_031077430.1/XP_031080202.1/XP_031087072.1/XP_031087959.1	6
CC	GO:0071010	prespliceosome	6/343	32/3769	0.065	0.93465	0.93465	XP_031075829.1/XP_031075769.1/XP_031077430.1/XP_031080202.1/XP_031087072.1/XP_031087959.1	6
BP	GO:0000724	double-strand break repair via homologous recombination	11/358	73/3915	0.0655676	0.967231	0.967231	XP_031076249.1/XP_031077200.1/XP_031079022.1/XP_031083817.1/XP_031087411.1/XP_031087419.1/XP_031087533.1/XP_031087542.1/XP_031087641.1/XP_031086974.1/XP_031088119.1	11
BP	GO:0031325	positive regulation of cellular metabolic process	55/358	496/3915	0.0662491	0.967231	0.967231	XP_031076272.1/XP_031075968.1/XP_031075808.1/XP_031075541.1/XP_031075534.1/XP_031075445.1/XP_031075320.1/XP_031075082.1/XP_031074816.1/XP_031074813.1/XP_031074691.1/XP_031077988.1/XP_031077854.1/XP_031077810.1/XP_031077753.1/XP_031077424.1/XP_031077291.1/XP_031077249.1/XP_031077200.1/XP_031077138.1/XP_031076955.1/XP_031076726.1/XP_031080135.1/XP_031080493.1/XP_031080570.1/XP_031080635.1/XP_031080…	55
MF	GO:0016788	hydrolase activity, acting on ester bonds	27/310	220/3385	0.0664271	0.930832	0.930832	XP_031076323.1/XP_031076249.1/XP_031076028.1/XP_031075768.1/XP_031075390.1/XP_031075200.1/XP_031075086.1/XP_031075057.1/XP_031077979.1/XP_031077189.1/XP_031079991.1/XP_031080695.1/XP_031080734.1/XP_031080826.1/XP_031080828.1/XP_031079482.1/XP_031079462.1/XP_031079179.1/XP_031078906.1/XP_031087352.1/XP_031082436.1/XP_031082731.1/XP_031082064.1/XP_031086989.1/XP_031087961.1/XP_031088119.1/XP_031086…	27
BP	GO:0051223	regulation of protein transport	7/358	40/3915	0.0674678	0.967231	0.967231	XP_031076272.1/XP_031077816.1/XP_031083543.1/XP_031089703.1/XP_031083242.1/XP_031081814.1/XP_031085409.1	7
MF	GO:0004527	exonuclease activity	7/310	40/3385	0.0677508	0.930832	0.930832	XP_031076249.1/XP_031075200.1/XP_031077189.1/XP_031079462.1/XP_031082731.1/XP_031082064.1/XP_031088119.1	7
MF	GO:0000978	RNA polymerase II cis-regulatory region sequence-specific DNA binding	10/310	65/3385	0.0689781	0.930832	0.930832	XP_031075846.1/XP_031077988.1/XP_031077249.1/XP_031077076.1/XP_031076726.1/XP_031084058.1/XP_031083555.1/XP_031082916.1/XP_031083027.1/XP_031088031.1	10
CC	GO:0030880	RNA polymerase complex	11/343	74/3769	0.0690212	0.93465	0.93465	XP_031075808.1/XP_031075096.1/XP_031074932.1/XP_031077753.1/XP_031077424.1/XP_031080635.1/XP_031082859.1/XP_031081705.1/XP_031086838.1/XP_031089003.1/XP_031087981.1	11
CC	GO:0030014	CCR4-NOT complex	3/343	11/3769	0.0710985	0.93465	0.93465	XP_031077854.1/XP_031077291.1/XP_031076955.1	3
CC	GO:0030015	CCR4-NOT core complex	3/343	11/3769	0.0710985	0.93465	0.93465	XP_031077854.1/XP_031077291.1/XP_031076955.1	3
BP	GO:0015914	phospholipid transport	5/358	25/3915	0.0718584	0.967231	0.967231	XP_031080598.1/XP_031080605.1/XP_031079008.1/XP_031087564.1/XP_031081977.1	5
BP	GO:0046031	ADP metabolic process	5/358	25/3915	0.0718584	0.967231	0.967231	XP_031075629.1/XP_031077138.1/XP_031079702.1/XP_031079062.1/XP_031086811.1	5
BP	GO:0007188	adenylate cyclase-modulating G protein-coupled receptor signaling pathway	3/358	11/3915	0.071947	0.967231	0.967231	XP_031075320.1/XP_031080828.1/XP_031083543.1	3
BP	GO:0009237	siderophore metabolic process	3/358	11/3915	0.071947	0.967231	0.967231	XP_031077249.1/XP_031079696.1/XP_031088960.1	3
BP	GO:0010525	regulation of transposition, RNA-mediated	3/358	11/3915	0.071947	0.967231	0.967231	XP_031087411.1/XP_031086938.1/XP_031089003.1	3
BP	GO:0043393	regulation of protein binding	3/358	11/3915	0.071947	0.967231	0.967231	XP_031074765.1/XP_031080123.1/XP_031088297.1	3
BP	GO:0051176	positive regulation of sulfur metabolic process	3/358	11/3915	0.071947	0.967231	0.967231	XP_031076272.1/XP_031075541.1/XP_031081891.1	3
BP	GO:0072337	modified amino acid transport	3/358	11/3915	0.071947	0.967231	0.967231	XP_031077325.1/XP_031079696.1/XP_031083984.1	3
BP	GO:0120036	plasma membrane bounded cell projection organization	3/358	11/3915	0.071947	0.967231	0.967231	XP_031075082.1/XP_031077816.1/XP_031081814.1	3
MF	GO:0016627	oxidoreductase activity, acting on the CH-CH group of donors	5/310	25/3385	0.0721336	0.930832	0.930832	XP_031077656.1/XP_031080712.1/XP_031080872.1/XP_031081426.1/XP_031081925.1	5
MF	GO:0003899	DNA-directed 5'-3' RNA polymerase activity	3/310	11/3385	0.0721691	0.930832	0.930832	XP_031075096.1/XP_031077200.1/XP_031081705.1	3
BP	GO:0006753	nucleoside phosphate metabolic process	24/358	194/3915	0.0747301	0.967231	0.967231	XP_031076323.1/XP_031075911.1/XP_031075629.1/XP_031075120.1/XP_031074933.1/XP_031077889.1/XP_031077656.1/XP_031077586.1/XP_031077138.1/XP_031080828.1/XP_031079702.1/XP_031079474.1/XP_031079062.1/XP_031083555.1/XP_031089689.1/XP_031082731.1/XP_031082860.1/XP_031083026.1/XP_031081426.1/XP_031081674.1/XP_031082090.1/XP_031086811.1/XP_031085254.1/XP_031086048.1	24
BP	GO:0031047	gene silencing by RNA	6/358	33/3915	0.0750648	0.967231	0.967231	XP_031075968.1/XP_031075779.1/XP_031080695.1/XP_031082893.1/XP_031081529.1/XP_031081872.1	6
BP	GO:0033157	regulation of intracellular protein transport	6/358	33/3915	0.0750648	0.967231	0.967231	XP_031076272.1/XP_031077816.1/XP_031083543.1/XP_031089703.1/XP_031083242.1/XP_031081814.1	6
BP	GO:0009404	toxin metabolic process	4/358	18/3915	0.0752935	0.967231	0.967231	XP_031074564.1/XP_031074392.1/XP_031078929.1/XP_031083699.1	4
BP	GO:0045943	positive regulation of transcription by RNA polymerase I	4/358	18/3915	0.0752935	0.967231	0.967231	XP_031075320.1/XP_031074691.1/XP_031077753.1/XP_031080635.1	4
BP	GO:0048193	Golgi vesicle transport	21/358	166/3915	0.0760562	0.967231	0.967231	XP_031075417.1/XP_031075385.1/XP_031075356.1/XP_031077307.1/XP_031079951.1/XP_031080038.1/XP_031080190.1/XP_031080222.1/XP_031080315.1/XP_031080598.1/XP_031079142.1/XP_031079045.1/XP_031079008.1/XP_031084018.1/XP_031087591.1/XP_031081977.1/XP_031086927.1/XP_031086970.1/XP_031086989.1/XP_031087019.1/XP_031088892.1	21
CC	GO:0090575	RNA polymerase II transcription regulator complex	9/343	58/3769	0.0762895	0.93465	0.93465	XP_031075808.1/XP_031074959.1/XP_031077424.1/XP_031084058.1/XP_031082859.1/XP_031086838.1/XP_031089003.1/XP_031087981.1/XP_031088031.1	9
MF	GO:0140640	catalytic activity, acting on a nucleic acid	35/310	302/3385	0.0793545	0.930832	0.930832	XP_031076249.1/XP_031075775.1/XP_031075445.1/XP_031075383.1/XP_031075200.1/XP_031075096.1/XP_031075017.1/XP_031075015.1/XP_031074813.1/XP_031077200.1/XP_031077189.1/XP_031077072.1/XP_031076636.1/XP_031079936.1/XP_031080153.1/XP_031080712.1/XP_031080826.1/XP_031080834.1/XP_031079500.1/XP_031079462.1/XP_031079223.1/XP_031079022.1/XP_031084345.1/XP_031083817.1/XP_031087352.1/XP_031087361.1/XP_031087…	35
BP	GO:0019693	ribose phosphate metabolic process	18/358	139/3915	0.0802989	0.967231	0.967231	XP_031076323.1/XP_031075629.1/XP_031074933.1/XP_031077889.1/XP_031077656.1/XP_031077586.1/XP_031077138.1/XP_031080828.1/XP_031079702.1/XP_031079474.1/XP_031079062.1/XP_031089689.1/XP_031083026.1/XP_031081426.1/XP_031081674.1/XP_031082090.1/XP_031086811.1/XP_031086048.1	18
CC	GO:0035838	growing cell tip	5/343	26/3769	0.0812492	0.93465	0.93465	XP_031075082.1/XP_031080695.1/XP_031079044.1/XP_031081814.1/XP_031081977.1	5
BP	GO:0006073	cellular glucan metabolic process	8/358	50/3915	0.0812929	0.967231	0.967231	XP_031075883.1/XP_031075779.1/XP_031080514.1/XP_031080695.1/XP_031078995.1/XP_031083732.1/XP_031081814.1/XP_031088982.1	8
BP	GO:0098657	import into cell	20/358	158/3915	0.0816319	0.967231	0.967231	XP_031075541.1/XP_031075386.1/XP_031077613.1/XP_031077596.1/XP_031077288.1/XP_031076958.1/XP_031079951.1/XP_031080123.1/XP_031080315.1/XP_031080598.1/XP_031080975.1/XP_031079696.1/XP_031079299.1/XP_031078721.1/XP_031083984.1/XP_031083630.1/XP_031082939.1/XP_031082978.1/XP_031088783.1/XP_031085409.1	20
BP	GO:0006356	regulation of transcription by RNA polymerase I	5/358	26/3915	0.0826106	0.967231	0.967231	XP_031075320.1/XP_031074691.1/XP_031077753.1/XP_031080635.1/XP_031082859.1	5
BP	GO:0009135	purine nucleoside diphosphate metabolic process	5/358	26/3915	0.0826106	0.967231	0.967231	XP_031075629.1/XP_031077138.1/XP_031079702.1/XP_031079062.1/XP_031086811.1	5
BP	GO:0009179	purine ribonucleoside diphosphate metabolic process	5/358	26/3915	0.0826106	0.967231	0.967231	XP_031075629.1/XP_031077138.1/XP_031079702.1/XP_031079062.1/XP_031086811.1	5
BP	GO:1901292	nucleoside phosphate catabolic process	5/358	26/3915	0.0826106	0.967231	0.967231	XP_031075629.1/XP_031075120.1/XP_031077138.1/XP_031080828.1/XP_031079702.1	5
CC	GO:0099023	vesicle tethering complex	6/343	34/3769	0.0829195	0.93465	0.93465	XP_031075356.1/XP_031079951.1/XP_031080315.1/XP_031079045.1/XP_031087591.1/XP_031087019.1	6
BP	GO:0070201	regulation of establishment of protein localization	7/358	42/3915	0.083615	0.967231	0.967231	XP_031076272.1/XP_031077816.1/XP_031083543.1/XP_031089703.1/XP_031083242.1/XP_031081814.1/XP_031085409.1	7
BP	GO:0022603	regulation of anatomical structure morphogenesis	12/358	85/3915	0.0836939	0.967231	0.967231	XP_031075193.1/XP_031075082.1/XP_031074938.1/XP_031077816.1/XP_031080695.1/XP_031080861.1/XP_031084047.1/XP_031083630.1/XP_031082939.1/XP_031083015.1/XP_031081814.1/XP_031081869.1	12
BP	GO:0055086	nucleobase-containing small molecule metabolic process	28/358	235/3915	0.0837331	0.967231	0.967231	XP_031076323.1/XP_031075911.1/XP_031075652.1/XP_031075629.1/XP_031075120.1/XP_031074933.1/XP_031077889.1/XP_031077656.1/XP_031077586.1/XP_031077385.1/XP_031077138.1/XP_031080828.1/XP_031079702.1/XP_031079474.1/XP_031079062.1/XP_031078995.1/XP_031083555.1/XP_031089689.1/XP_031082436.1/XP_031082731.1/XP_031082860.1/XP_031083026.1/XP_031081426.1/XP_031081674.1/XP_031082090.1/XP_031086811.1/XP_031085…	28
BP	GO:0045292	mRNA cis splicing, via spliceosome	14/358	103/3915	0.0838423	0.967231	0.967231	XP_031075829.1/XP_031075769.1/XP_031075383.1/XP_031074579.1/XP_031077430.1/XP_031076958.1/XP_031080202.1/XP_031079389.1/XP_031082451.1/XP_031082685.1/XP_031082739.1/XP_031087072.1/XP_031087959.1/XP_031088315.1	14
MF	GO:0001216	DNA-binding transcription activator activity	7/310	42/3385	0.0839676	0.930832	0.930832	XP_031077988.1/XP_031077249.1/XP_031076726.1/XP_031084058.1/XP_031083555.1/XP_031082916.1/XP_031088031.1	7
MF	GO:0001228	DNA-binding transcription activator activity, RNA polymerase II-specific	7/310	42/3385	0.0839676	0.930832	0.930832	XP_031077988.1/XP_031077249.1/XP_031076726.1/XP_031084058.1/XP_031083555.1/XP_031082916.1/XP_031088031.1	7
MF	GO:0016614	oxidoreductase activity, acting on CH-OH group of donors	12/310	85/3385	0.0840646	0.930832	0.930832	XP_031075629.1/XP_031078049.1/XP_031080879.1/XP_031078906.1/XP_031083772.1/XP_031083678.1/XP_031087527.1/XP_031083003.1/XP_031086574.1/XP_031086811.1/XP_031084921.1/XP_031085254.1	12
BP	GO:0022414	reproductive process	45/358	404/3915	0.086612	0.967231	0.967231	XP_031076249.1/XP_031076045.1/XP_031075968.1/XP_031075541.1/XP_031075390.1/XP_031075320.1/XP_031075215.1/XP_031075193.1/XP_031075082.1/XP_031074938.1/XP_031074765.1/XP_031077854.1/XP_031077613.1/XP_031077603.1/XP_031077288.1/XP_031077286.1/XP_031077189.1/XP_031080222.1/XP_031080296.1/XP_031080315.1/XP_031080598.1/XP_031080695.1/XP_031080861.1/XP_031079610.1/XP_031079022.1/XP_031084058.1/XP_031083…	45
BP	GO:0072330	monocarboxylic acid biosynthetic process	10/358	68/3915	0.0876813	0.967231	0.967231	XP_031076272.1/XP_031075629.1/XP_031075541.1/XP_031077138.1/XP_031080038.1/XP_031079702.1/XP_031079474.1/XP_031079008.1/XP_031083566.1/XP_031081891.1	10
BP	GO:0050793	regulation of developmental process	15/358	113/3915	0.0884519	0.967231	0.967231	XP_031075968.1/XP_031075193.1/XP_031075082.1/XP_031074938.1/XP_031077816.1/XP_031080222.1/XP_031080695.1/XP_031080861.1/XP_031084047.1/XP_031083699.1/XP_031083630.1/XP_031082939.1/XP_031083015.1/XP_031081814.1/XP_031081869.1	15
BP	GO:0051052	regulation of DNA metabolic process	15/358	113/3915	0.0884519	0.967231	0.967231	XP_031076045.1/XP_031077753.1/XP_031077200.1/XP_031089054.1/XP_031080570.1/XP_031080635.1/XP_031080895.1/XP_031079022.1/XP_031083817.1/XP_031083571.1/XP_031087411.1/XP_031087641.1/XP_031089003.1/XP_031088031.1/XP_031088119.1	15
BP	GO:0000393	spliceosomal conformational changes to generate catalytic conformation	4/358	19/3915	0.0887967	0.967231	0.967231	XP_031074579.1/XP_031079389.1/XP_031082451.1/XP_031087959.1	4
BP	GO:0031060	regulation of histone methylation	4/358	19/3915	0.0887967	0.967231	0.967231	XP_031075968.1/XP_031077753.1/XP_031080635.1/XP_031081529.1	4
BP	GO:0031321	ascospore-type prospore assembly	4/358	19/3915	0.0887967	0.967231	0.967231	XP_031077288.1/XP_031080315.1/XP_031083732.1/XP_031081977.1	4
BP	GO:0051100	negative regulation of binding	4/358	19/3915	0.0887967	0.967231	0.967231	XP_031075445.1/XP_031080123.1/XP_031083817.1/XP_031088297.1	4
MF	GO:0001098	basal transcription machinery binding	4/310	19/3385	0.0891065	0.930832	0.930832	XP_031075808.1/XP_031077753.1/XP_031080635.1/XP_031086938.1	4
MF	GO:0001099	basal RNA polymerase II transcription machinery binding	4/310	19/3385	0.0891065	0.930832	0.930832	XP_031075808.1/XP_031077753.1/XP_031080635.1/XP_031086938.1	4
MF	GO:0016877	ligase activity, forming carbon-sulfur bonds	4/310	19/3385	0.0891065	0.930832	0.930832	XP_031075967.1/XP_031077072.1/XP_031082090.1/XP_031087977.1	4
MF	GO:0030170	pyridoxal phosphate binding	4/310	19/3385	0.0891065	0.930832	0.930832	XP_031080639.1/XP_031084212.1/XP_031081700.1/XP_031081710.1	4
MF	GO:0070279	vitamin B6 binding	4/310	19/3385	0.0891065	0.930832	0.930832	XP_031080639.1/XP_031084212.1/XP_031081700.1/XP_031081710.1	4
BP	GO:0071963	establishment or maintenance of cell polarity regulating cell shape	8/358	51/3915	0.0891452	0.967231	0.967231	XP_031075082.1/XP_031074938.1/XP_031080695.1/XP_031080861.1/XP_031084047.1/XP_031082939.1/XP_031081814.1/XP_031081869.1	8
BP	GO:0032502	developmental process	37/358	325/3915	0.0891614	0.967231	0.967231	XP_031076272.1/XP_031076249.1/XP_031075968.1/XP_031075320.1/XP_031075193.1/XP_031075082.1/XP_031074938.1/XP_031077816.1/XP_031077613.1/XP_031077288.1/XP_031077286.1/XP_031077249.1/XP_031077189.1/XP_031080222.1/XP_031080315.1/XP_031080695.1/XP_031080861.1/XP_031079334.1/XP_031078792.1/XP_031084047.1/XP_031083817.1/XP_031083732.1/XP_031083699.1/XP_031083630.1/XP_031087419.1/XP_031087527.1/XP_031082…	37
BP	GO:0000729	DNA double-strand break processing	3/358	12/3915	0.089659	0.967231	0.967231	XP_031076249.1/XP_031077189.1/XP_031083817.1	3
BP	GO:0000753	cell morphogenesis involved in conjugation with cellular fusion	3/358	12/3915	0.089659	0.967231	0.967231	XP_031075193.1/XP_031075082.1/XP_031081814.1	3
BP	GO:0006359	regulation of transcription by RNA polymerase III	3/358	12/3915	0.089659	0.967231	0.967231	XP_031075320.1/XP_031080771.1/XP_031088297.1	3
BP	GO:0008277	regulation of G protein-coupled receptor signaling pathway	3/358	12/3915	0.089659	0.967231	0.967231	XP_031075320.1/XP_031080828.1/XP_031083543.1	3
BP	GO:0032197	transposition, RNA-mediated	3/358	12/3915	0.089659	0.967231	0.967231	XP_031087411.1/XP_031086938.1/XP_031089003.1	3
BP	GO:0034309	primary alcohol biosynthetic process	3/358	12/3915	0.089659	0.967231	0.967231	XP_031080665.1/XP_031079062.1/XP_031086811.1	3
BP	GO:0042762	regulation of sulfur metabolic process	3/358	12/3915	0.089659	0.967231	0.967231	XP_031076272.1/XP_031075541.1/XP_031081891.1	3
BP	GO:1902807	negative regulation of cell cycle G1/S phase transition	3/358	12/3915	0.089659	0.967231	0.967231	XP_031077760.1/XP_031080123.1/XP_031079334.1	3
BP	GO:2000134	negative regulation of G1/S transition of mitotic cell cycle	3/358	12/3915	0.089659	0.967231	0.967231	XP_031077760.1/XP_031080123.1/XP_031079334.1	3
BP	GO:0032880	regulation of protein localization	12/358	86/3915	0.0896696	0.967231	0.967231	XP_031076272.1/XP_031075320.1/XP_031075082.1/XP_031074765.1/XP_031077816.1/XP_031080695.1/XP_031083630.1/XP_031083543.1/XP_031089703.1/XP_031083242.1/XP_031081814.1/XP_031085409.1	12
MF	GO:0034062	5'-3' RNA polymerase activity	3/310	12/3385	0.0899324	0.930832	0.930832	XP_031075096.1/XP_031077200.1/XP_031081705.1	3
MF	GO:0097747	RNA polymerase activity	3/310	12/3385	0.0899324	0.930832	0.930832	XP_031075096.1/XP_031077200.1/XP_031081705.1	3
CC	GO:0031461	cullin-RING ubiquitin ligase complex	7/343	43/3769	0.0905923	0.93465	0.93465	XP_031076000.1/XP_031075968.1/XP_031075198.1/XP_031089054.1/XP_031080895.1/XP_031081824.1/XP_031082013.1	7
BP	GO:0007131	reciprocal meiotic recombination	7/358	43/3915	0.0924513	0.967231	0.967231	XP_031076249.1/XP_031077603.1/XP_031079022.1/XP_031083817.1/XP_031087641.1/XP_031082671.1/XP_031088031.1	7
BP	GO:0140527	reciprocal homologous recombination	7/358	43/3915	0.0924513	0.967231	0.967231	XP_031076249.1/XP_031077603.1/XP_031079022.1/XP_031083817.1/XP_031087641.1/XP_031082671.1/XP_031088031.1	7
CC	GO:0005874	microtubule	6/343	35/3769	0.0928094	0.93465	0.93465	XP_031074938.1/XP_031074871.1/XP_031077574.1/XP_031080052.1/XP_031080861.1/XP_031087601.1	6
BP	GO:1903725	regulation of phospholipid metabolic process	5/358	27/3915	0.0941644	0.967231	0.967231	XP_031079008.1/XP_031084047.1/XP_031083915.1/XP_031083630.1/XP_031081977.1	5
MF	GO:0042802	identical protein binding	6/310	35/3385	0.0949065	0.930832	0.930832	XP_031074813.1/XP_031083817.1/XP_031083566.1/XP_031081548.1/XP_031081710.1/XP_031081925.1	6
BP	GO:0009607	response to biotic stimulus	13/358	96/3915	0.0955839	0.967231	0.967231	XP_031076045.1/XP_031075541.1/XP_031075390.1/XP_031077765.1/XP_031077505.1/XP_031077189.1/XP_031080296.1/XP_031083571.1/XP_031083543.1/XP_031087597.1/XP_031081814.1/XP_031081869.1/XP_031086989.1	13
BP	GO:0019637	organophosphate metabolic process	38/358	337/3915	0.0956054	0.967231	0.967231	XP_031076323.1/XP_031076028.1/XP_031075911.1/XP_031075768.1/XP_031075629.1/XP_031075120.1/XP_031074933.1/XP_031077979.1/XP_031077889.1/XP_031077656.1/XP_031077586.1/XP_031077138.1/XP_031080828.1/XP_031080857.1/XP_031079702.1/XP_031079474.1/XP_031079062.1/XP_031079008.1/XP_031078906.1/XP_031084047.1/XP_031083915.1/XP_031083630.1/XP_031083555.1/XP_031089689.1/XP_031082731.1/XP_031082860.1/XP_031082…	38
BP	GO:0048869	cellular developmental process	30/358	258/3915	0.0961508	0.967231	0.967231	XP_031076272.1/XP_031076249.1/XP_031075968.1/XP_031075320.1/XP_031075193.1/XP_031075082.1/XP_031077816.1/XP_031077613.1/XP_031077288.1/XP_031077249.1/XP_031077189.1/XP_031080222.1/XP_031080315.1/XP_031080695.1/XP_031079334.1/XP_031083817.1/XP_031083732.1/XP_031083699.1/XP_031083630.1/XP_031087419.1/XP_031087527.1/XP_031082916.1/XP_031082978.1/XP_031081729.1/XP_031081814.1/XP_031081869.1/XP_031081…	30
BP	GO:0009117	nucleotide metabolic process	23/358	190/3915	0.0962355	0.967231	0.967231	XP_031076323.1/XP_031075911.1/XP_031075629.1/XP_031075120.1/XP_031074933.1/XP_031077889.1/XP_031077656.1/XP_031077586.1/XP_031077138.1/XP_031080828.1/XP_031079702.1/XP_031079474.1/XP_031079062.1/XP_031083555.1/XP_031089689.1/XP_031082860.1/XP_031083026.1/XP_031081426.1/XP_031081674.1/XP_031082090.1/XP_031086811.1/XP_031085254.1/XP_031086048.1	23
MF	GO:0000981	DNA-binding transcription factor activity, RNA polymerase II-specific	12/310	87/3385	0.0963383	0.930832	0.930832	XP_031075846.1/XP_031075534.1/XP_031077988.1/XP_031077249.1/XP_031077076.1/XP_031076726.1/XP_031080635.1/XP_031084058.1/XP_031083555.1/XP_031082859.1/XP_031082916.1/XP_031088031.1	12
BP	GO:0051053	negative regulation of DNA metabolic process	8/358	52/3915	0.0974223	0.967231	0.967231	XP_031076045.1/XP_031077753.1/XP_031080635.1/XP_031083817.1/XP_031083571.1/XP_031087411.1/XP_031087641.1/XP_031088119.1	8
BP	GO:0090087	regulation of peptide transport	7/358	44/3915	0.10179	0.967231	0.967231	XP_031076272.1/XP_031077816.1/XP_031083543.1/XP_031089703.1/XP_031083242.1/XP_031081814.1/XP_031085409.1	7
BP	GO:0006352	DNA-templated transcription initiation	10/358	70/3915	0.101953	0.967231	0.967231	XP_031077291.1/XP_031080570.1/XP_031080771.1/XP_031079601.1/XP_031082859.1/XP_031081872.1/XP_031086838.1/XP_031089003.1/XP_031087981.1/XP_031088297.1	10
BP	GO:0009653	anatomical structure morphogenesis	24/358	201/3915	0.102034	0.967231	0.967231	XP_031076272.1/XP_031076249.1/XP_031075320.1/XP_031075193.1/XP_031075082.1/XP_031074938.1/XP_031077816.1/XP_031077613.1/XP_031077288.1/XP_031080222.1/XP_031080315.1/XP_031080695.1/XP_031080861.1/XP_031084047.1/XP_031083732.1/XP_031083630.1/XP_031082939.1/XP_031082978.1/XP_031083015.1/XP_031081814.1/XP_031081869.1/XP_031081891.1/XP_031081977.1/XP_031088783.1	24
BP	GO:0006099	tricarboxylic acid cycle	4/358	20/3915	0.103375	0.967231	0.967231	XP_031074564.1/XP_031078049.1/XP_031087527.1/XP_031082090.1	4
BP	GO:0031297	replication fork processing	4/358	20/3915	0.103375	0.967231	0.967231	XP_031077189.1/XP_031080695.1/XP_031083817.1/XP_031087419.1	4
BP	GO:0051222	positive regulation of protein transport	4/358	20/3915	0.103375	0.967231	0.967231	XP_031083543.1/XP_031089703.1/XP_031083242.1/XP_031085409.1	4
BP	GO:1904951	positive regulation of establishment of protein localization	4/358	20/3915	0.103375	0.967231	0.967231	XP_031083543.1/XP_031089703.1/XP_031083242.1/XP_031085409.1	4
MF	GO:0043175	RNA polymerase core enzyme binding	4/310	20/3385	0.103733	0.930832	0.930832	XP_031077753.1/XP_031080635.1/XP_031086938.1/XP_031088297.1	4
MF	GO:0070063	RNA polymerase binding	4/310	20/3385	0.103733	0.930832	0.930832	XP_031077753.1/XP_031080635.1/XP_031086938.1/XP_031088297.1	4
MF	GO:0140296	general transcription initiation factor binding	4/310	20/3385	0.103733	0.930832	0.930832	XP_031075808.1/XP_031080570.1/XP_031082859.1/XP_031088297.1	4
MF	GO:0140110	transcription regulator activity	22/310	182/3385	0.103748	0.930832	0.930832	XP_031075846.1/XP_031075534.1/XP_031074849.1/XP_031074816.1/XP_031077988.1/XP_031077810.1/XP_031077753.1/XP_031077249.1/XP_031077076.1/XP_031076726.1/XP_031080635.1/XP_031080771.1/XP_031079389.1/XP_031084058.1/XP_031083555.1/XP_031082859.1/XP_031082916.1/XP_031086838.1/XP_031089003.1/XP_031087981.1/XP_031088031.1/XP_031088297.1	22
BP	GO:0034248	regulation of cellular amide metabolic process	18/358	144/3915	0.104187	0.967231	0.967231	XP_031076272.1/XP_031075541.1/XP_031075445.1/XP_031077854.1/XP_031077291.1/XP_031077249.1/XP_031076955.1/XP_031080135.1/XP_031080493.1/XP_031079462.1/XP_031079334.1/XP_031079233.1/XP_031083956.1/XP_031087352.1/XP_031087729.1/XP_031082412.1/XP_031082916.1/XP_031081891.1	18
BP	GO:0051173	positive regulation of nitrogen compound metabolic process	50/358	461/3915	0.10489	0.967231	0.967231	XP_031076272.1/XP_031075968.1/XP_031075808.1/XP_031075541.1/XP_031075534.1/XP_031075445.1/XP_031075320.1/XP_031075082.1/XP_031074816.1/XP_031074813.1/XP_031074691.1/XP_031077988.1/XP_031077854.1/XP_031077810.1/XP_031077753.1/XP_031077424.1/XP_031077291.1/XP_031077249.1/XP_031077200.1/XP_031076955.1/XP_031076726.1/XP_031080135.1/XP_031080493.1/XP_031080570.1/XP_031080635.1/XP_031080695.1/XP_031079…	50
BP	GO:0009064	glutamine family amino acid metabolic process	8/358	53/3915	0.10612	0.967231	0.967231	XP_031074995.1/XP_031078049.1/XP_031077592.1/XP_031077235.1/XP_031080117.1/XP_031082916.1/XP_031081700.1/XP_031081710.1	8
BP	GO:0000076	DNA replication checkpoint signaling	5/358	28/3915	0.106496	0.967231	0.967231	XP_031076045.1/XP_031080695.1/XP_031083571.1/XP_031087419.1/XP_031088119.1	5
BP	GO:0006282	regulation of DNA repair	5/358	28/3915	0.106496	0.967231	0.967231	XP_031077753.1/XP_031080635.1/XP_031083817.1/XP_031087641.1/XP_031088119.1	5
MF	GO:0001067	transcription regulatory region nucleic acid binding	14/310	107/3385	0.107193	0.930832	0.930832	XP_031075846.1/XP_031075534.1/XP_031077988.1/XP_031077249.1/XP_031077076.1/XP_031076726.1/XP_031080771.1/XP_031084058.1/XP_031083555.1/XP_031082859.1/XP_031082916.1/XP_031083027.1/XP_031088031.1/XP_031088297.1	14
CC	GO:0000922	spindle pole	3/343	13/3769	0.107767	0.93465	0.93465	XP_031075390.1/XP_031074938.1/XP_031080315.1	3
CC	GO:0101031	chaperone complex	3/343	13/3769	0.107767	0.93465	0.93465	XP_031075982.1/XP_031077724.1/XP_031079154.1	3
BP	GO:0031507	heterochromatin formation	13/358	98/3915	0.1081	0.967231	0.967231	XP_031076197.1/XP_031075968.1/XP_031075779.1/XP_031077200.1/XP_031080635.1/XP_031080695.1/XP_031083571.1/XP_031087597.1/XP_031082799.1/XP_031082893.1/XP_031081529.1/XP_031081872.1/XP_031086974.1	13
BP	GO:0000723	telomere maintenance	9/358	62/3915	0.10851	0.967231	0.967231	XP_031076249.1/XP_031075200.1/XP_031077189.1/XP_031079022.1/XP_031083817.1/XP_031083571.1/XP_031087411.1/XP_031087641.1/XP_031088119.1	9
BP	GO:0032200	telomere organization	9/358	62/3915	0.10851	0.967231	0.967231	XP_031076249.1/XP_031075200.1/XP_031077189.1/XP_031079022.1/XP_031083817.1/XP_031083571.1/XP_031087411.1/XP_031087641.1/XP_031088119.1	9
BP	GO:0018958	phenol-containing compound metabolic process	3/358	13/3915	0.10898	0.967231	0.967231	XP_031080734.1/XP_031078776.1/XP_031078507.1	3
BP	GO:0019184	nonribosomal peptide biosynthetic process	3/358	13/3915	0.10898	0.967231	0.967231	XP_031077249.1/XP_031080661.1/XP_031088960.1	3
BP	GO:0030030	cell projection organization	3/358	13/3915	0.10898	0.967231	0.967231	XP_031075082.1/XP_031077816.1/XP_031081814.1	3
BP	GO:0036171	filamentous growth of a population of unicellular organisms in response to chemical stimulus	3/358	13/3915	0.10898	0.967231	0.967231	XP_031075320.1/XP_031077765.1/XP_031078792.1	3
BP	GO:0061587	transfer RNA gene-mediated silencing	3/358	13/3915	0.10898	0.967231	0.967231	XP_031075779.1/XP_031080695.1/XP_031082893.1	3
BP	GO:1901407	regulation of phosphorylation of RNA polymerase II C-terminal domain	3/358	13/3915	0.10898	0.967231	0.967231	XP_031077753.1/XP_031080635.1/XP_031081471.1	3
MF	GO:0044183	protein folding chaperone	3/310	13/3385	0.109308	0.930832	0.930832	XP_031077724.1/XP_031077574.1/XP_031079154.1	3
MF	GO:0016791	phosphatase activity	10/310	71/3385	0.110069	0.930832	0.930832	XP_031075768.1/XP_031075390.1/XP_031075086.1/XP_031077979.1/XP_031079991.1/XP_031080695.1/XP_031080734.1/XP_031079482.1/XP_031082436.1/XP_031087961.1	10
BP	GO:0046677	response to antibiotic	7/358	45/3915	0.111622	0.967231	0.967231	XP_031080117.1/XP_031079334.1/XP_031078792.1/XP_031083027.1/XP_031086811.1/XP_031086937.1/XP_031088960.1	7
CC	GO:0016591	RNA polymerase II, holoenzyme	8/343	54/3769	0.112826	0.93465	0.93465	XP_031075808.1/XP_031077753.1/XP_031077424.1/XP_031080635.1/XP_031082859.1/XP_031086838.1/XP_031089003.1/XP_031087981.1	8
BP	GO:0006302	double-strand break repair	14/358	108/3915	0.112952	0.967231	0.967231	XP_031076249.1/XP_031075200.1/XP_031077200.1/XP_031077189.1/XP_031079022.1/XP_031083817.1/XP_031087411.1/XP_031087419.1/XP_031087533.1/XP_031087542.1/XP_031087641.1/XP_031089719.1/XP_031086974.1/XP_031088119.1	14
BP	GO:0016054	organic acid catabolic process	14/358	108/3915	0.112952	0.967231	0.967231	XP_031076323.1/XP_031075629.1/XP_031074995.1/XP_031074564.1/XP_031077989.1/XP_031077988.1/XP_031079062.1/XP_031078507.1/XP_031083003.1/XP_031083027.1/XP_031081700.1/XP_031081710.1/XP_031086811.1/XP_031086048.1	14
BP	GO:0046395	carboxylic acid catabolic process	14/358	108/3915	0.112952	0.967231	0.967231	XP_031076323.1/XP_031075629.1/XP_031074995.1/XP_031074564.1/XP_031077989.1/XP_031077988.1/XP_031079062.1/XP_031078507.1/XP_031083003.1/XP_031083027.1/XP_031081700.1/XP_031081710.1/XP_031086811.1/XP_031086048.1	14
BP	GO:0000041	transition metal ion transport	8/358	54/3915	0.115234	0.967231	0.967231	XP_031075386.1/XP_031077249.1/XP_031079915.1/XP_031080975.1/XP_031079696.1/XP_031079489.1/XP_031079299.1/XP_031078721.1	8
BP	GO:0010876	lipid localization	8/358	54/3915	0.115234	0.967231	0.967231	XP_031080598.1/XP_031080605.1/XP_031080857.1/XP_031079008.1/XP_031084047.1/XP_031087564.1/XP_031087712.1/XP_031081977.1	8
BP	GO:0060249	anatomical structure homeostasis	8/358	54/3915	0.115234	0.967231	0.967231	XP_031076249.1/XP_031075200.1/XP_031077189.1/XP_031079022.1/XP_031083817.1/XP_031083571.1/XP_031087411.1/XP_031088119.1	8
BP	GO:0098781	ncRNA transcription	8/358	54/3915	0.115234	0.967231	0.967231	XP_031075096.1/XP_031074932.1/XP_031077753.1/XP_031080635.1/XP_031079601.1/XP_031082859.1/XP_031081705.1/XP_031088031.1	8
BP	GO:0032879	regulation of localization	21/358	175/3915	0.11603	0.967231	0.967231	XP_031076272.1/XP_031075390.1/XP_031075320.1/XP_031075082.1/XP_031074765.1/XP_031077816.1/XP_031077249.1/XP_031079915.1/XP_031080123.1/XP_031080695.1/XP_031079517.1/XP_031084047.1/XP_031084018.1/XP_031083630.1/XP_031083543.1/XP_031087591.1/XP_031089703.1/XP_031083242.1/XP_031081814.1/XP_031086970.1/XP_031085409.1	21
BP	GO:0034660	ncRNA metabolic process	46/358	424/3915	0.116377	0.967231	0.967231	XP_031076062.1/XP_031076000.1/XP_031075875.1/XP_031075775.1/XP_031075508.1/XP_031075320.1/XP_031075096.1/XP_031075017.1/XP_031075015.1/XP_031074932.1/XP_031074813.1/XP_031074691.1/XP_031077753.1/XP_031077730.1/XP_031077506.1/XP_031077072.1/XP_031076636.1/XP_031079936.1/XP_031080052.1/XP_031080635.1/XP_031080695.1/XP_031080712.1/XP_031080757.1/XP_031080826.1/XP_031080834.1/XP_031079601.1/XP_031079…	46
BP	GO:0000245	spliceosomal complex assembly	6/358	37/3915	0.116423	0.967231	0.967231	XP_031075829.1/XP_031075769.1/XP_031074579.1/XP_031080202.1/XP_031089703.1/XP_031087072.1	6
BP	GO:0006090	pyruvate metabolic process	6/358	37/3915	0.116423	0.967231	0.967231	XP_031075629.1/XP_031077138.1/XP_031079702.1/XP_031079062.1/XP_031089689.1/XP_031086811.1	6
MF	GO:0043565	sequence-specific DNA binding	21/310	175/3385	0.116523	0.930832	0.930832	XP_031076249.1/XP_031075846.1/XP_031075829.1/XP_031075534.1/XP_031075508.1/XP_031074849.1/XP_031077988.1/XP_031077249.1/XP_031077200.1/XP_031077076.1/XP_031076726.1/XP_031080771.1/XP_031084058.1/XP_031083555.1/XP_031087542.1/XP_031082859.1/XP_031082916.1/XP_031083027.1/XP_031086974.1/XP_031088031.1/XP_031088297.1	21
MF	GO:0005096	GTPase activator activity	6/310	37/3385	0.116892	0.930832	0.930832	XP_031075193.1/XP_031075082.1/XP_031077574.1/XP_031080123.1/XP_031079517.1/XP_031086970.1	6
BP	GO:0010389	regulation of G2/M transition of mitotic cell cycle	9/358	63/3915	0.116994	0.967231	0.967231	XP_031076045.1/XP_031075390.1/XP_031075320.1/XP_031074765.1/XP_031083571.1/XP_031087419.1/XP_031087601.1/XP_031083242.1/XP_031088119.1	9
BP	GO:1902749	regulation of cell cycle G2/M phase transition	9/358	63/3915	0.116994	0.967231	0.967231	XP_031076045.1/XP_031075390.1/XP_031075320.1/XP_031074765.1/XP_031083571.1/XP_031087419.1/XP_031087601.1/XP_031083242.1/XP_031088119.1	9
CC	GO:1990023	mitotic spindle midzone	4/343	21/3769	0.117381	0.93465	0.93465	XP_031075390.1/XP_031074871.1/XP_031087601.1/XP_031083242.1	4
BP	GO:0072522	purine-containing compound biosynthetic process	10/358	72/3915	0.117499	0.967231	0.967231	XP_031075911.1/XP_031075629.1/XP_031077889.1/XP_031077138.1/XP_031079702.1/XP_031079474.1/XP_031089689.1/XP_031082436.1/XP_031083026.1/XP_031081674.1	10
BP	GO:0072384	organelle transport along microtubule	4/358	21/3915	0.118967	0.967231	0.967231	XP_031074938.1/XP_031080861.1/XP_031080899.1/XP_031087601.1	4
BP	GO:1901988	negative regulation of cell cycle phase transition	14/358	109/3915	0.119415	0.967231	0.967231	XP_031076249.1/XP_031076045.1/XP_031075390.1/XP_031075320.1/XP_031074765.1/XP_031077760.1/XP_031080123.1/XP_031080695.1/XP_031079334.1/XP_031083571.1/XP_031087419.1/XP_031087601.1/XP_031083242.1/XP_031088119.1	14
BP	GO:0009185	ribonucleoside diphosphate metabolic process	5/358	29/3915	0.119577	0.967231	0.967231	XP_031075629.1/XP_031077138.1/XP_031079702.1/XP_031079062.1/XP_031086811.1	5
BP	GO:0042592	homeostatic process	32/358	285/3915	0.12428	0.967231	0.967231	XP_031076249.1/XP_031076028.1/XP_031075974.1/XP_031075386.1/XP_031075320.1/XP_031075212.1/XP_031075200.1/XP_031075086.1/XP_031077362.1/XP_031077249.1/XP_031077189.1/XP_031077138.1/XP_031077076.1/XP_031079915.1/XP_031080695.1/XP_031080828.1/XP_031079696.1/XP_031079299.1/XP_031079022.1/XP_031083817.1/XP_031083630.1/XP_031083571.1/XP_031083543.1/XP_031087411.1/XP_031089719.1/XP_031089703.1/XP_031083…	32
MF	GO:0140101	catalytic activity, acting on a tRNA	11/310	82/3385	0.125437	0.930832	0.930832	XP_031075775.1/XP_031075015.1/XP_031074813.1/XP_031077072.1/XP_031076636.1/XP_031079936.1/XP_031080712.1/XP_031080826.1/XP_031079500.1/XP_031087361.1/XP_031082064.1	11
BP	GO:0034249	negative regulation of cellular amide metabolic process	9/358	64/3915	0.125832	0.967231	0.967231	XP_031075445.1/XP_031077854.1/XP_031077291.1/XP_031077249.1/XP_031076955.1/XP_031079462.1/XP_031079334.1/XP_031079233.1/XP_031082412.1	9
BP	GO:0046488	phosphatidylinositol metabolic process	9/358	64/3915	0.125832	0.967231	0.967231	XP_031075768.1/XP_031080857.1/XP_031079008.1/XP_031084047.1/XP_031083915.1/XP_031081977.1/XP_031086769.1/XP_031086989.1/XP_031087961.1	9
BP	GO:0006897	endocytosis	14/358	110/3915	0.126091	0.967231	0.967231	XP_031075541.1/XP_031077613.1/XP_031077596.1/XP_031077288.1/XP_031076958.1/XP_031079951.1/XP_031080315.1/XP_031080598.1/XP_031083984.1/XP_031083630.1/XP_031082939.1/XP_031082978.1/XP_031088783.1/XP_031085409.1	14
MF	GO:0016616	oxidoreductase activity, acting on the CH-OH group of donors, NAD or NADP as acceptor	10/310	73/3385	0.126324	0.930832	0.930832	XP_031075629.1/XP_031078049.1/XP_031080879.1/XP_031078906.1/XP_031083772.1/XP_031083678.1/XP_031087527.1/XP_031086574.1/XP_031086811.1/XP_031084921.1	10
CC	GO:0005938	cell cortex	21/343	178/3769	0.127014	0.93465	0.93465	XP_031075768.1/XP_031075390.1/XP_031075193.1/XP_031075082.1/XP_031074765.1/XP_031077613.1/XP_031077596.1/XP_031079951.1/XP_031080052.1/XP_031080315.1/XP_031080695.1/XP_031079044.1/XP_031084047.1/XP_031087601.1/XP_031087641.1/XP_031082939.1/XP_031082978.1/XP_031083015.1/XP_031081814.1/XP_031088783.1/XP_031088871.1	21
BP	GO:0055082	cellular chemical homeostasis	22/358	187/3915	0.127823	0.967231	0.967231	XP_031076028.1/XP_031075974.1/XP_031075386.1/XP_031075320.1/XP_031075212.1/XP_031075086.1/XP_031077362.1/XP_031077249.1/XP_031077138.1/XP_031077076.1/XP_031079915.1/XP_031080695.1/XP_031080828.1/XP_031079696.1/XP_031079299.1/XP_031083630.1/XP_031083543.1/XP_031089703.1/XP_031081869.1/XP_031087019.1/XP_031088960.1/XP_031088002.1	22
BP	GO:0030258	lipid modification	6/358	38/3915	0.128247	0.967231	0.967231	XP_031076323.1/XP_031075768.1/XP_031079482.1/XP_031084047.1/XP_031087961.1/XP_031086048.1	6
MF	GO:0004812	aminoacyl-tRNA ligase activity	6/310	38/3385	0.128763	0.930832	0.930832	XP_031075775.1/XP_031075015.1/XP_031074813.1/XP_031076636.1/XP_031079936.1/XP_031079500.1	6
MF	GO:0016875	ligase activity, forming carbon-oxygen bonds	6/310	38/3385	0.128763	0.930832	0.930832	XP_031075775.1/XP_031075015.1/XP_031074813.1/XP_031076636.1/XP_031079936.1/XP_031079500.1	6
CC	GO:0061695	transferase complex, transferring phosphorus-containing groups	16/343	130/3769	0.129058	0.93465	0.93465	XP_031075808.1/XP_031075096.1/XP_031074932.1/XP_031077753.1/XP_031077424.1/XP_031077138.1/XP_031080635.1/XP_031083915.1/XP_031083543.1/XP_031082859.1/XP_031081705.1/XP_031086838.1/XP_031089001.1/XP_031089003.1/XP_031087961.1/XP_031087981.1	16
MF	GO:0008509	anion transmembrane transporter activity	13/310	101/3385	0.129233	0.930832	0.930832	XP_031075517.1/XP_031077505.1/XP_031077362.1/XP_031080824.1/XP_031080915.1/XP_031079489.1/XP_031079319.1/XP_031084069.1/XP_031083984.1/XP_031087632.1/XP_031082574.1/XP_031082027.1/XP_031086608.1	13
BP	GO:0030582	reproductive fruiting body development	3/358	14/3915	0.129737	0.967231	0.967231	XP_031077286.1/XP_031080222.1/XP_031083699.1	3
BP	GO:0030584	sporocarp development	3/358	14/3915	0.129737	0.967231	0.967231	XP_031077286.1/XP_031080222.1/XP_031083699.1	3
BP	GO:0042866	pyruvate biosynthetic process	3/358	14/3915	0.129737	0.967231	0.967231	XP_031075629.1/XP_031077138.1/XP_031079702.1	3
BP	GO:0044409	entry into host	3/358	14/3915	0.129737	0.967231	0.967231	XP_031076272.1/XP_031075541.1/XP_031081891.1	3
BP	GO:0070127	tRNA aminoacylation for mitochondrial protein translation	3/358	14/3915	0.129737	0.967231	0.967231	XP_031075015.1/XP_031074813.1/XP_031076636.1	3
BP	GO:1901678	iron coordination entity transport	3/358	14/3915	0.129737	0.967231	0.967231	XP_031075386.1/XP_031079696.1/XP_031079489.1	3
BP	GO:0044282	small molecule catabolic process	20/358	168/3915	0.130232	0.967231	0.967231	XP_031076323.1/XP_031075629.1/XP_031074995.1/XP_031074564.1/XP_031077989.1/XP_031077988.1/XP_031077979.1/XP_031077138.1/XP_031079702.1/XP_031079062.1/XP_031078507.1/XP_031083678.1/XP_031083003.1/XP_031083027.1/XP_031081548.1/XP_031081700.1/XP_031081710.1/XP_031086811.1/XP_031088206.1/XP_031086048.1	20
CC	GO:0005654	nucleoplasm	28/343	248/3769	0.131183	0.93465	0.93465	XP_031076197.1/XP_031076045.1/XP_031075968.1/XP_031075808.1/XP_031075390.1/XP_031075096.1/XP_031074932.1/XP_031074816.1/XP_031077753.1/XP_031077730.1/XP_031077424.1/XP_031077189.1/XP_031080635.1/XP_031080695.1/XP_031079462.1/XP_031083817.1/XP_031087419.1/XP_031087542.1/XP_031082799.1/XP_031082859.1/XP_031082893.1/XP_031081872.1/XP_031086838.1/XP_031086923.1/XP_031086974.1/XP_031089003.1/XP_031087…	28
CC	GO:0099568	cytoplasmic region	21/343	179/3769	0.132397	0.93465	0.93465	XP_031075768.1/XP_031075390.1/XP_031075193.1/XP_031075082.1/XP_031074765.1/XP_031077613.1/XP_031077596.1/XP_031079951.1/XP_031080052.1/XP_031080315.1/XP_031080695.1/XP_031079044.1/XP_031084047.1/XP_031087601.1/XP_031087641.1/XP_031082939.1/XP_031082978.1/XP_031083015.1/XP_031081814.1/XP_031088783.1/XP_031088871.1	21
BP	GO:0007052	mitotic spindle organization	7/358	47/3915	0.132725	0.967231	0.967231	XP_031075390.1/XP_031074938.1/XP_031074871.1/XP_031080695.1/XP_031087601.1/XP_031083242.1/XP_031081739.1	7
BP	GO:0044774	mitotic DNA integrity checkpoint signaling	7/358	47/3915	0.132725	0.967231	0.967231	XP_031076249.1/XP_031076045.1/XP_031077760.1/XP_031079334.1/XP_031083571.1/XP_031087419.1/XP_031088119.1	7
BP	GO:0051701	biological process involved in interaction with host	7/358	47/3915	0.132725	0.967231	0.967231	XP_031076272.1/XP_031075541.1/XP_031078792.1/XP_031087597.1/XP_031082568.1/XP_031081891.1/XP_031086989.1	7
BP	GO:0098656	anion transmembrane transport	16/358	130/3915	0.133148	0.967231	0.967231	XP_031075517.1/XP_031077505.1/XP_031077362.1/XP_031080123.1/XP_031080824.1/XP_031080915.1/XP_031079696.1/XP_031079489.1/XP_031079319.1/XP_031084069.1/XP_031083984.1/XP_031087632.1/XP_031082574.1/XP_031082027.1/XP_031086608.1/XP_031085409.1	16
BP	GO:0009250	glucan biosynthetic process	5/358	30/3915	0.133372	0.967231	0.967231	XP_031080514.1/XP_031078995.1/XP_031083732.1/XP_031081814.1/XP_031088982.1	5
CC	GO:0051233	spindle midzone	4/343	22/3769	0.133743	0.93465	0.93465	XP_031075390.1/XP_031074871.1/XP_031087601.1/XP_031083242.1	4
MF	GO:0004721	phosphoprotein phosphatase activity	5/310	30/3385	0.133872	0.930832	0.930832	XP_031075390.1/XP_031075086.1/XP_031079991.1/XP_031080695.1/XP_031080734.1	5
BP	GO:0036170	filamentous growth of a population of unicellular organisms in response to starvation	8/358	56/3915	0.134676	0.967231	0.967231	XP_031075541.1/XP_031075320.1/XP_031077765.1/XP_031077505.1/XP_031078792.1/XP_031083543.1/XP_031087597.1/XP_031081869.1	8
BP	GO:0006458	'de novo' protein folding	4/358	22/3915	0.135503	0.967231	0.967231	XP_031077724.1/XP_031077563.1/XP_031079154.1/XP_031078995.1	4
BP	GO:1903320	regulation of protein modification by small protein conjugation or removal	4/358	22/3915	0.135503	0.967231	0.967231	XP_031077753.1/XP_031080635.1/XP_031087641.1/XP_031082013.1	4
BP	GO:0030001	metal ion transport	13/358	102/3915	0.135913	0.967231	0.967231	XP_031075386.1/XP_031075212.1/XP_031077635.1/XP_031077249.1/XP_031079915.1/XP_031080975.1/XP_031079696.1/XP_031079489.1/XP_031079299.1/XP_031078721.1/XP_031087110.1/XP_031088002.1/XP_031084712.1	13
BP	GO:0070828	heterochromatin organization	13/358	102/3915	0.135913	0.967231	0.967231	XP_031076197.1/XP_031075968.1/XP_031075779.1/XP_031077200.1/XP_031080635.1/XP_031080695.1/XP_031083571.1/XP_031087597.1/XP_031082799.1/XP_031082893.1/XP_031081529.1/XP_031081872.1/XP_031086974.1	13
MF	GO:0019842	vitamin binding	4/310	22/3385	0.135965	0.930832	0.930832	XP_031080639.1/XP_031084212.1/XP_031081700.1/XP_031081710.1	4
BP	GO:0048856	anatomical structure development	26/358	228/3915	0.136336	0.967231	0.967231	XP_031076272.1/XP_031076249.1/XP_031075320.1/XP_031075193.1/XP_031075082.1/XP_031074938.1/XP_031077816.1/XP_031077613.1/XP_031077288.1/XP_031077286.1/XP_031080222.1/XP_031080315.1/XP_031080695.1/XP_031080861.1/XP_031084047.1/XP_031083732.1/XP_031083699.1/XP_031083630.1/XP_031082939.1/XP_031082978.1/XP_031083015.1/XP_031081814.1/XP_031081869.1/XP_031081891.1/XP_031081977.1/XP_031088783.1	26
BP	GO:0051172	negative regulation of nitrogen compound metabolic process	42/358	389/3915	0.13662	0.967231	0.967231	XP_031076197.1/XP_031076102.1/XP_031076045.1/XP_031075968.1/XP_031075808.1/XP_031075779.1/XP_031075445.1/XP_031077989.1/XP_031077854.1/XP_031077753.1/XP_031077424.1/XP_031077291.1/XP_031077249.1/XP_031077200.1/XP_031077076.1/XP_031076955.1/XP_031080635.1/XP_031080695.1/XP_031080828.1/XP_031079462.1/XP_031079334.1/XP_031079233.1/XP_031079022.1/XP_031084047.1/XP_031083817.1/XP_031083571.1/XP_031083…	42
BP	GO:0016072	rRNA metabolic process	28/358	248/3915	0.137032	0.967231	0.967231	XP_031076062.1/XP_031076000.1/XP_031075875.1/XP_031075508.1/XP_031075017.1/XP_031074691.1/XP_031077753.1/XP_031077730.1/XP_031080635.1/XP_031080695.1/XP_031080757.1/XP_031080834.1/XP_031079601.1/XP_031079462.1/XP_031079223.1/XP_031079174.1/XP_031084345.1/XP_031087645.1/XP_031087711.1/XP_031082638.1/XP_031082859.1/XP_031081510.1/XP_031081550.1/XP_031081551.1/XP_031081702.1/XP_031081705.1/XP_031086…	28
BP	GO:0022613	ribonucleoprotein complex biogenesis	42/358	390/3915	0.140475	0.967231	0.967231	XP_031076062.1/XP_031076000.1/XP_031075875.1/XP_031075829.1/XP_031075769.1/XP_031075508.1/XP_031075017.1/XP_031074691.1/XP_031074579.1/XP_031077900.1/XP_031077760.1/XP_031077753.1/XP_031077730.1/XP_031077602.1/XP_031077225.1/XP_031080202.1/XP_031080493.1/XP_031080598.1/XP_031080635.1/XP_031080695.1/XP_031080757.1/XP_031080834.1/XP_031079462.1/XP_031079389.1/XP_031079223.1/XP_031079174.1/XP_031084…	42
BP	GO:0006418	tRNA aminoacylation for protein translation	6/358	39/3915	0.140626	0.967231	0.967231	XP_031075775.1/XP_031075015.1/XP_031074813.1/XP_031076636.1/XP_031079936.1/XP_031079500.1	6
BP	GO:0070897	transcription preinitiation complex assembly	6/358	39/3915	0.140626	0.967231	0.967231	XP_031080570.1/XP_031082859.1/XP_031081872.1/XP_031086838.1/XP_031087981.1/XP_031088297.1	6
BP	GO:0051321	meiotic cell cycle	30/358	269/3915	0.141899	0.967231	0.967231	XP_031076249.1/XP_031076045.1/XP_031075968.1/XP_031075541.1/XP_031075390.1/XP_031075215.1/XP_031074938.1/XP_031074765.1/XP_031077613.1/XP_031077603.1/XP_031077288.1/XP_031077189.1/XP_031080315.1/XP_031080695.1/XP_031080861.1/XP_031079022.1/XP_031084058.1/XP_031083817.1/XP_031083732.1/XP_031083543.1/XP_031087542.1/XP_031087601.1/XP_031087641.1/XP_031082671.1/XP_031082799.1/XP_031082978.1/XP_031081…	30
BP	GO:0031324	negative regulation of cellular metabolic process	44/358	411/3915	0.142705	0.967231	0.967231	XP_031076197.1/XP_031076102.1/XP_031076045.1/XP_031075968.1/XP_031075808.1/XP_031075779.1/XP_031075445.1/XP_031077989.1/XP_031077854.1/XP_031077753.1/XP_031077424.1/XP_031077291.1/XP_031077249.1/XP_031077200.1/XP_031077076.1/XP_031076955.1/XP_031080120.1/XP_031080635.1/XP_031080695.1/XP_031080828.1/XP_031079462.1/XP_031079334.1/XP_031079233.1/XP_031079022.1/XP_031079008.1/XP_031084047.1/XP_031083…	44
BP	GO:0051050	positive regulation of transport	7/358	48/3915	0.143969	0.967231	0.967231	XP_031080123.1/XP_031084018.1/XP_031083543.1/XP_031089703.1/XP_031083242.1/XP_031081814.1/XP_031085409.1	7
BP	GO:0000082	G1/S transition of mitotic cell cycle	8/358	57/3915	0.144986	0.967231	0.967231	XP_031077760.1/XP_031080123.1/XP_031080635.1/XP_031080895.1/XP_031079334.1/XP_031084058.1/XP_031081869.1/XP_031088031.1	8
BP	GO:0036180	filamentous growth of a population of unicellular organisms in response to biotic stimulus	8/358	57/3915	0.144986	0.967231	0.967231	XP_031075541.1/XP_031077765.1/XP_031077505.1/XP_031080296.1/XP_031083543.1/XP_031087597.1/XP_031081814.1/XP_031081869.1	8
BP	GO:0044843	cell cycle G1/S phase transition	8/358	57/3915	0.144986	0.967231	0.967231	XP_031077760.1/XP_031080123.1/XP_031080635.1/XP_031080895.1/XP_031079334.1/XP_031084058.1/XP_031081869.1/XP_031088031.1	8
BP	GO:1902850	microtubule cytoskeleton organization involved in mitosis	8/358	57/3915	0.144986	0.967231	0.967231	XP_031075390.1/XP_031074938.1/XP_031074871.1/XP_031080695.1/XP_031080899.1/XP_031087601.1/XP_031083242.1/XP_031081739.1	8
BP	GO:0044262	cellular carbohydrate metabolic process	20/358	171/3915	0.147593	0.967231	0.967231	XP_031075883.1/XP_031075779.1/XP_031075652.1/XP_031075629.1/XP_031078096.1/XP_031077979.1/XP_031077138.1/XP_031080120.1/XP_031080514.1/XP_031080695.1/XP_031080734.1/XP_031078995.1/XP_031083732.1/XP_031083572.1/XP_031083555.1/XP_031081814.1/XP_031086975.1/XP_031088982.1/XP_031088206.1/XP_031085254.1	20
BP	GO:0006826	iron ion transport	5/358	31/3915	0.147843	0.967231	0.967231	XP_031075386.1/XP_031077249.1/XP_031079696.1/XP_031079489.1/XP_031079299.1	5
BP	GO:0007018	microtubule-based movement	5/358	31/3915	0.147843	0.967231	0.967231	XP_031074938.1/XP_031074871.1/XP_031080861.1/XP_031080899.1/XP_031087601.1	5
BP	GO:0009132	nucleoside diphosphate metabolic process	5/358	31/3915	0.147843	0.967231	0.967231	XP_031075629.1/XP_031077138.1/XP_031079702.1/XP_031079062.1/XP_031086811.1	5
BP	GO:2001020	regulation of response to DNA damage stimulus	5/358	31/3915	0.147843	0.967231	0.967231	XP_031077753.1/XP_031080635.1/XP_031083817.1/XP_031087641.1/XP_031088119.1	5
CC	GO:0005782	peroxisomal matrix	3/343	15/3769	0.150157	0.93465	0.93465	XP_031076323.1/XP_031078792.1/XP_031086048.1	3
CC	GO:0031907	microbody lumen	3/343	15/3769	0.150157	0.93465	0.93465	XP_031076323.1/XP_031078792.1/XP_031086048.1	3
CC	GO:0005876	spindle microtubule	4/343	23/3769	0.150975	0.93465	0.93465	XP_031074938.1/XP_031074871.1/XP_031080861.1/XP_031087601.1	4
CC	GO:0031298	replication fork protection complex	4/343	23/3769	0.150975	0.93465	0.93465	XP_031077200.1/XP_031083571.1/XP_031087542.1/XP_031086974.1	4
CC	GO:0051285	cell cortex of cell tip	6/343	40/3769	0.151028	0.93465	0.93465	XP_031075193.1/XP_031075082.1/XP_031074765.1/XP_031077596.1/XP_031080315.1/XP_031081814.1	6
CC	GO:0098588	bounding membrane of organelle	43/343	405/3769	0.151201	0.93465	0.93465	XP_031076272.1/XP_031075982.1/XP_031075932.1/XP_031075660.1/XP_031075320.1/XP_031075212.1/XP_031077835.1/XP_031077635.1/XP_031077596.1/XP_031077291.1/XP_031077072.1/XP_031079915.1/XP_031080222.1/XP_031080605.1/XP_031079696.1/XP_031079610.1/XP_031079364.1/XP_031079319.1/XP_031079142.1/XP_031078906.1/XP_031084018.1/XP_031083984.1/XP_031083915.1/XP_031087453.1/XP_031087564.1/XP_031087591.1/XP_031087…	43
BP	GO:0010106	cellular response to iron ion starvation	3/358	15/3915	0.151749	0.967231	0.967231	XP_031075386.1/XP_031077249.1/XP_031088960.1	3
BP	GO:0010520	regulation of reciprocal meiotic recombination	3/358	15/3915	0.151749	0.967231	0.967231	XP_031083817.1/XP_031087641.1/XP_031088031.1	3
BP	GO:0031167	rRNA methylation	3/358	15/3915	0.151749	0.967231	0.967231	XP_031079223.1/XP_031084345.1/XP_031086923.1	3
MF	GO:0008649	rRNA methyltransferase activity	3/310	15/3385	0.152194	0.930832	0.930832	XP_031079223.1/XP_031084345.1/XP_031086923.1	3
MF	GO:0140102	catalytic activity, acting on a rRNA	3/310	15/3385	0.152194	0.930832	0.930832	XP_031079223.1/XP_031084345.1/XP_031086923.1	3
BP	GO:0000086	G2/M transition of mitotic cell cycle	10/358	76/3915	0.152294	0.967231	0.967231	XP_031076045.1/XP_031075390.1/XP_031075320.1/XP_031074765.1/XP_031080452.1/XP_031083571.1/XP_031087419.1/XP_031087601.1/XP_031083242.1/XP_031088119.1	10
BP	GO:0044839	cell cycle G2/M phase transition	10/358	76/3915	0.152294	0.967231	0.967231	XP_031076045.1/XP_031075390.1/XP_031075320.1/XP_031074765.1/XP_031080452.1/XP_031083571.1/XP_031087419.1/XP_031087601.1/XP_031083242.1/XP_031088119.1	10
BP	GO:0000003	reproduction	46/358	434/3915	0.152365	0.967231	0.967231	XP_031076249.1/XP_031076045.1/XP_031075968.1/XP_031075541.1/XP_031075390.1/XP_031075320.1/XP_031075215.1/XP_031075193.1/XP_031075082.1/XP_031074938.1/XP_031074765.1/XP_031077854.1/XP_031077613.1/XP_031077603.1/XP_031077288.1/XP_031077286.1/XP_031077189.1/XP_031080222.1/XP_031080296.1/XP_031080315.1/XP_031080598.1/XP_031080695.1/XP_031080861.1/XP_031079610.1/XP_031079022.1/XP_031084058.1/XP_031083…	46
BP	GO:0051646	mitochondrion localization	4/358	23/3915	0.15291	0.967231	0.967231	XP_031074938.1/XP_031080861.1/XP_031087564.1/XP_031088783.1	4
BP	GO:0070301	cellular response to hydrogen peroxide	4/358	23/3915	0.15291	0.967231	0.967231	XP_031079334.1/XP_031078792.1/XP_031086937.1/XP_031088960.1	4
MF	GO:0015297	antiporter activity	4/310	23/3385	0.153426	0.930832	0.930832	XP_031077325.1/XP_031080915.1/XP_031079696.1/XP_031079489.1	4
BP	GO:0071236	cellular response to antibiotic	6/358	40/3915	0.153536	0.967231	0.967231	XP_031080117.1/XP_031079334.1/XP_031078792.1/XP_031086811.1/XP_031086937.1/XP_031088960.1	6
BP	GO:0006066	alcohol metabolic process	14/358	114/3915	0.154873	0.967231	0.967231	XP_031078049.1/XP_031077979.1/XP_031077765.1/XP_031077586.1/XP_031080665.1/XP_031080872.1/XP_031080879.1/XP_031079062.1/XP_031083572.1/XP_031086574.1/XP_031086811.1/XP_031088960.1/XP_031088206.1/XP_031085254.1	14
BP	GO:0042594	response to starvation	17/358	143/3915	0.155489	0.967231	0.967231	XP_031075779.1/XP_031075541.1/XP_031075534.1/XP_031075386.1/XP_031075320.1/XP_031077765.1/XP_031077505.1/XP_031077249.1/XP_031077076.1/XP_031079334.1/XP_031078792.1/XP_031083543.1/XP_031087597.1/XP_031082731.1/XP_031081869.1/XP_031088871.1/XP_031088960.1	17
BP	GO:0006869	lipid transport	7/358	49/3915	0.155652	0.967231	0.967231	XP_031080598.1/XP_031080605.1/XP_031079008.1/XP_031084047.1/XP_031087564.1/XP_031087712.1/XP_031081977.1	7
BP	GO:0035825	homologous recombination	7/358	49/3915	0.155652	0.967231	0.967231	XP_031076249.1/XP_031077603.1/XP_031079022.1/XP_031083817.1/XP_031087641.1/XP_031082671.1/XP_031088031.1	7
BP	GO:0031327	negative regulation of cellular biosynthetic process	37/358	343/3915	0.156849	0.967231	0.967231	XP_031076197.1/XP_031076045.1/XP_031075968.1/XP_031075808.1/XP_031075779.1/XP_031075445.1/XP_031077989.1/XP_031077854.1/XP_031077424.1/XP_031077291.1/XP_031077249.1/XP_031077200.1/XP_031077076.1/XP_031076955.1/XP_031080120.1/XP_031080635.1/XP_031080695.1/XP_031079462.1/XP_031079334.1/XP_031079233.1/XP_031079022.1/XP_031079008.1/XP_031084047.1/XP_031083817.1/XP_031083571.1/XP_031087533.1/XP_031087…	37
BP	GO:0005975	carbohydrate metabolic process	27/358	242/3915	0.156928	0.967231	0.967231	XP_031075883.1/XP_031075779.1/XP_031075652.1/XP_031075629.1/XP_031075429.1/XP_031078096.1/XP_031077979.1/XP_031077349.1/XP_031077138.1/XP_031080120.1/XP_031080514.1/XP_031080695.1/XP_031080734.1/XP_031079702.1/XP_031079062.1/XP_031078995.1/XP_031083732.1/XP_031083678.1/XP_031083572.1/XP_031083555.1/XP_031081548.1/XP_031081814.1/XP_031086811.1/XP_031086975.1/XP_031088982.1/XP_031088206.1/XP_031085…	27
BP	GO:0015980	energy derivation by oxidation of organic compounds	15/358	124/3915	0.157896	0.967231	0.967231	XP_031075779.1/XP_031074933.1/XP_031074564.1/XP_031078049.1/XP_031080026.1/XP_031080514.1/XP_031080695.1/XP_031079489.1/XP_031079062.1/XP_031087527.1/XP_031082860.1/XP_031081426.1/XP_031082090.1/XP_031086811.1/XP_031088982.1	15
BP	GO:0051049	regulation of transport	15/358	124/3915	0.157896	0.967231	0.967231	XP_031076272.1/XP_031077816.1/XP_031077249.1/XP_031080123.1/XP_031079517.1/XP_031084047.1/XP_031084018.1/XP_031083630.1/XP_031083543.1/XP_031087591.1/XP_031089703.1/XP_031083242.1/XP_031081814.1/XP_031086970.1/XP_031085409.1	15
CC	GO:0000151	ubiquitin ligase complex	10/343	77/3769	0.158178	0.93465	0.93465	XP_031076000.1/XP_031075968.1/XP_031075198.1/XP_031089054.1/XP_031079951.1/XP_031080120.1/XP_031080135.1/XP_031080895.1/XP_031081824.1/XP_031082013.1	10
CC	GO:0031226	intrinsic component of plasma membrane	14/343	115/3769	0.15822	0.93465	0.93465	XP_031075974.1/XP_031075517.1/XP_031075386.1/XP_031078096.1/XP_031077362.1/XP_031080296.1/XP_031080975.1/XP_031079696.1/XP_031079299.1/XP_031078721.1/XP_031083732.1/XP_031082574.1/XP_031081928.1/XP_031089999.1	14
BP	GO:0010562	positive regulation of phosphorus metabolic process	11/358	86/3915	0.158448	0.967231	0.967231	XP_031075082.1/XP_031077753.1/XP_031077200.1/XP_031080635.1/XP_031080695.1/XP_031079008.1/XP_031083915.1/XP_031083555.1/XP_031087419.1/XP_031081471.1/XP_031088119.1	11
BP	GO:0045937	positive regulation of phosphate metabolic process	11/358	86/3915	0.158448	0.967231	0.967231	XP_031075082.1/XP_031077753.1/XP_031077200.1/XP_031080635.1/XP_031080695.1/XP_031079008.1/XP_031083915.1/XP_031083555.1/XP_031087419.1/XP_031081471.1/XP_031088119.1	11
BP	GO:0009636	response to toxic substance	13/358	105/3915	0.159137	0.967231	0.967231	XP_031074392.1/XP_031080734.1/XP_031079334.1/XP_031079319.1/XP_031078929.1/XP_031078792.1/XP_031078697.1/XP_031087758.1/XP_031083027.1/XP_031083342.1/XP_031086937.1/XP_031088960.1/XP_031088206.1	13
MF	GO:0016491	oxidoreductase activity	34/310	313/3385	0.159706	0.930832	0.930832	XP_031075629.1/XP_031075445.1/XP_031075183.1/XP_031074995.1/XP_031078049.1/XP_031077765.1/XP_031077656.1/XP_031077257.1/XP_031076666.1/XP_031080026.1/XP_031080117.1/XP_031080712.1/XP_031080872.1/XP_031080879.1/XP_031079299.1/XP_031078906.1/XP_031078792.1/XP_031078697.1/XP_031083772.1/XP_031083678.1/XP_031087527.1/XP_031089689.1/XP_031082671.1/XP_031082860.1/XP_031083003.1/XP_031083127.1/XP_031083…	34
BP	GO:0009267	cellular response to starvation	16/358	134/3915	0.160359	0.967231	0.967231	XP_031075779.1/XP_031075534.1/XP_031075386.1/XP_031075320.1/XP_031077765.1/XP_031077505.1/XP_031077249.1/XP_031077076.1/XP_031079334.1/XP_031078792.1/XP_031083543.1/XP_031087597.1/XP_031082731.1/XP_031081869.1/XP_031088871.1/XP_031088960.1	16
CC	GO:0031965	nuclear membrane	5/343	32/3769	0.160606	0.93465	0.93465	XP_031075215.1/XP_031079610.1/XP_031084047.1/XP_031087352.1/XP_031081814.1	5
BP	GO:0009890	negative regulation of biosynthetic process	37/358	344/3915	0.161323	0.967231	0.967231	XP_031076197.1/XP_031076045.1/XP_031075968.1/XP_031075808.1/XP_031075779.1/XP_031075445.1/XP_031077989.1/XP_031077854.1/XP_031077424.1/XP_031077291.1/XP_031077249.1/XP_031077200.1/XP_031077076.1/XP_031076955.1/XP_031080120.1/XP_031080635.1/XP_031080695.1/XP_031079462.1/XP_031079334.1/XP_031079233.1/XP_031079022.1/XP_031079008.1/XP_031084047.1/XP_031083817.1/XP_031083571.1/XP_031087533.1/XP_031087…	37
BP	GO:0006536	glutamate metabolic process	5/358	32/3915	0.162948	0.967231	0.967231	XP_031074995.1/XP_031078049.1/XP_031077592.1/XP_031080117.1/XP_031081700.1	5
BP	GO:0051054	positive regulation of DNA metabolic process	5/358	32/3915	0.162948	0.967231	0.967231	XP_031077200.1/XP_031080570.1/XP_031079022.1/XP_031089003.1/XP_031088031.1	5
BP	GO:1901701	cellular response to oxygen-containing compound	12/358	96/3915	0.163366	0.967231	0.967231	XP_031075320.1/XP_031077138.1/XP_031080117.1/XP_031080828.1/XP_031079334.1/XP_031078792.1/XP_031083630.1/XP_031083543.1/XP_031081869.1/XP_031086811.1/XP_031086937.1/XP_031088960.1	12
MF	GO:0016796	exonuclease activity, active with either ribo- or deoxyribonucleic acids and producing 5'-phosphomonoesters	5/310	32/3385	0.163551	0.930832	0.930832	XP_031076249.1/XP_031075200.1/XP_031077189.1/XP_031079462.1/XP_031082064.1	5
MF	GO:0016830	carbon-carbon lyase activity	5/310	32/3385	0.163551	0.930832	0.930832	XP_031077889.1/XP_031077623.1/XP_031079062.1/XP_031078507.1/XP_031088871.1	5
MF	GO:0003682	chromatin binding	12/310	96/3385	0.164169	0.930832	0.930832	XP_031076197.1/XP_031075829.1/XP_031075215.1/XP_031077753.1/XP_031077249.1/XP_031077189.1/XP_031080635.1/XP_031087411.1/XP_031082859.1/XP_031082916.1/XP_031086838.1/XP_031086974.1	12
BP	GO:0031570	DNA integrity checkpoint signaling	8/358	59/3915	0.166724	0.967231	0.967231	XP_031076249.1/XP_031076045.1/XP_031077760.1/XP_031080695.1/XP_031079334.1/XP_031083571.1/XP_031087419.1/XP_031088119.1	8
BP	GO:1903313	positive regulation of mRNA metabolic process	8/358	59/3915	0.166724	0.967231	0.967231	XP_031075445.1/XP_031077854.1/XP_031077291.1/XP_031076955.1/XP_031079462.1/XP_031079233.1/XP_031089703.1/XP_031082412.1	8
BP	GO:0043038	amino acid activation	6/358	41/3915	0.16695	0.967231	0.967231	XP_031075775.1/XP_031075015.1/XP_031074813.1/XP_031076636.1/XP_031079936.1/XP_031079500.1	6
BP	GO:0043039	tRNA aminoacylation	6/358	41/3915	0.16695	0.967231	0.967231	XP_031075775.1/XP_031075015.1/XP_031074813.1/XP_031076636.1/XP_031079936.1/XP_031079500.1	6
BP	GO:0098876	vesicle-mediated transport to the plasma membrane	6/358	41/3915	0.16695	0.967231	0.967231	XP_031079951.1/XP_031080315.1/XP_031080598.1/XP_031079008.1/XP_031081977.1/XP_031087019.1	6
BP	GO:0016311	dephosphorylation	13/358	106/3915	0.16731	0.967231	0.967231	XP_031075779.1/XP_031075768.1/XP_031075390.1/XP_031075086.1/XP_031077979.1/XP_031079991.1/XP_031080695.1/XP_031080734.1/XP_031079482.1/XP_031084047.1/XP_031082436.1/XP_031087961.1/XP_031087981.1	13
MF	GO:0045182	translation regulator activity	8/310	59/3385	0.16746	0.930832	0.930832	XP_031075875.1/XP_031077900.1/XP_031077760.1/XP_031080493.1/XP_031079334.1/XP_031083956.1/XP_031087729.1/XP_031082568.1	8
BP	GO:0003333	amino acid transmembrane transport	7/358	50/3915	0.167757	0.967231	0.967231	XP_031080123.1/XP_031079319.1/XP_031084069.1/XP_031087632.1/XP_031082027.1/XP_031086608.1/XP_031085409.1	7
CC	GO:0032153	cell division site	16/343	136/3769	0.170044	0.93465	0.93465	XP_031075390.1/XP_031075193.1/XP_031075082.1/XP_031074765.1/XP_031077596.1/XP_031079951.1/XP_031080315.1/XP_031080695.1/XP_031079044.1/XP_031083630.1/XP_031087601.1/XP_031089703.1/XP_031082939.1/XP_031083015.1/XP_031081814.1/XP_031081977.1	16
BP	GO:0045930	negative regulation of mitotic cell cycle	14/358	116/3915	0.170472	0.967231	0.967231	XP_031076249.1/XP_031076045.1/XP_031075390.1/XP_031075320.1/XP_031074765.1/XP_031077760.1/XP_031080123.1/XP_031080695.1/XP_031079334.1/XP_031083571.1/XP_031087419.1/XP_031087601.1/XP_031083242.1/XP_031088119.1	14
BP	GO:0019320	hexose catabolic process	4/358	24/3915	0.171107	0.967231	0.967231	XP_031077138.1/XP_031079702.1/XP_031083678.1/XP_031081548.1	4
BP	GO:0051273	beta-glucan metabolic process	4/358	24/3915	0.171107	0.967231	0.967231	XP_031075883.1/XP_031078995.1/XP_031083732.1/XP_031081814.1	4
MF	GO:0008047	enzyme activator activity	14/310	116/3385	0.171338	0.930832	0.930832	XP_031075193.1/XP_031075082.1/XP_031077574.1/XP_031077563.1/XP_031077216.1/XP_031076958.1/XP_031080123.1/XP_031079517.1/XP_031087419.1/XP_031081471.1/XP_031081872.1/XP_031086970.1/XP_031087981.1/XP_031088119.1	14
CC	GO:0099738	cell cortex region	9/343	69/3769	0.171534	0.93465	0.93465	XP_031075193.1/XP_031075082.1/XP_031074765.1/XP_031077596.1/XP_031080315.1/XP_031079044.1/XP_031082939.1/XP_031083015.1/XP_031081814.1	9
MF	GO:0004536	deoxyribonuclease activity	4/310	24/3385	0.171678	0.930832	0.930832	XP_031076249.1/XP_031075200.1/XP_031077189.1/XP_031082064.1	4
CC	GO:0005887	integral component of plasma membrane	11/343	88/3769	0.1728	0.93465	0.93465	XP_031075974.1/XP_031075517.1/XP_031075386.1/XP_031077362.1/XP_031080975.1/XP_031079696.1/XP_031079299.1/XP_031078721.1/XP_031082574.1/XP_031081928.1/XP_031089999.1	11
BP	GO:0000395	mRNA 5'-splice site recognition	3/358	16/3915	0.174836	0.967231	0.967231	XP_031075769.1/XP_031080202.1/XP_031087072.1	3
BP	GO:0016574	histone ubiquitination	3/358	16/3915	0.174836	0.967231	0.967231	XP_031077753.1/XP_031080635.1/XP_031089719.1	3
BP	GO:0031058	positive regulation of histone modification	3/358	16/3915	0.174836	0.967231	0.967231	XP_031075968.1/XP_031077753.1/XP_031080635.1	3
BP	GO:0044000	movement in host	3/358	16/3915	0.174836	0.967231	0.967231	XP_031076272.1/XP_031075541.1/XP_031081891.1	3
BP	GO:0046164	alcohol catabolic process	3/358	16/3915	0.174836	0.967231	0.967231	XP_031077979.1/XP_031086811.1/XP_031088206.1	3
BP	GO:0046824	positive regulation of nucleocytoplasmic transport	3/358	16/3915	0.174836	0.967231	0.967231	XP_031083543.1/XP_031089703.1/XP_031083242.1	3
BP	GO:0075259	spore-bearing structure development	3/358	16/3915	0.174836	0.967231	0.967231	XP_031077286.1/XP_031080222.1/XP_031083699.1	3
BP	GO:0090316	positive regulation of intracellular protein transport	3/358	16/3915	0.174836	0.967231	0.967231	XP_031083543.1/XP_031089703.1/XP_031083242.1	3
BP	GO:0006631	fatty acid metabolic process	9/358	69/3915	0.175062	0.967231	0.967231	XP_031076323.1/XP_031075967.1/XP_031074564.1/XP_031077325.1/XP_031080038.1/XP_031079474.1/XP_031079008.1/XP_031087533.1/XP_031086048.1	9
MF	GO:0004520	endodeoxyribonuclease activity	3/310	16/3385	0.175341	0.930832	0.930832	XP_031076249.1/XP_031077189.1/XP_031082064.1	3
MF	GO:0005516	calmodulin binding	3/310	16/3385	0.175341	0.930832	0.930832	XP_031074765.1/XP_031080452.1/XP_031082568.1	3
MF	GO:0016645	oxidoreductase activity, acting on the CH-NH group of donors	3/310	16/3385	0.175341	0.930832	0.930832	XP_031075183.1/XP_031077257.1/XP_031082860.1	3
CC	GO:1990204	oxidoreductase complex	7/343	51/3769	0.177166	0.93465	0.93465	XP_031074933.1/XP_031078049.1/XP_031079299.1/XP_031089689.1/XP_031082860.1/XP_031081426.1/XP_031085254.1	7
BP	GO:0003006	developmental process involved in reproduction	18/358	156/3915	0.177767	0.967231	0.967231	XP_031076249.1/XP_031075968.1/XP_031075193.1/XP_031075082.1/XP_031077613.1/XP_031077288.1/XP_031077286.1/XP_031080222.1/XP_031080315.1/XP_031080695.1/XP_031083817.1/XP_031083732.1/XP_031083699.1/XP_031087419.1/XP_031082978.1/XP_031081814.1/XP_031081977.1/XP_031088783.1	18
BP	GO:0007568	aging	8/358	60/3915	0.178124	0.967231	0.967231	XP_031075320.1/XP_031077189.1/XP_031079334.1/XP_031078792.1/XP_031087527.1/XP_031081729.1/XP_031081869.1/XP_031085254.1	8
BP	GO:0010604	positive regulation of macromolecule metabolic process	48/358	461/3915	0.178128	0.967231	0.967231	XP_031075968.1/XP_031075808.1/XP_031075534.1/XP_031075445.1/XP_031075320.1/XP_031075082.1/XP_031074816.1/XP_031074813.1/XP_031074691.1/XP_031077988.1/XP_031077854.1/XP_031077810.1/XP_031077753.1/XP_031077424.1/XP_031077291.1/XP_031077249.1/XP_031077200.1/XP_031076955.1/XP_031076726.1/XP_031080135.1/XP_031080493.1/XP_031080570.1/XP_031080635.1/XP_031080695.1/XP_031079462.1/XP_031079233.1/XP_031079…	48
BP	GO:2000113	negative regulation of cellular macromolecule biosynthetic process	34/358	317/3915	0.178415	0.967231	0.967231	XP_031076197.1/XP_031076045.1/XP_031075968.1/XP_031075808.1/XP_031075779.1/XP_031075445.1/XP_031077989.1/XP_031077854.1/XP_031077424.1/XP_031077291.1/XP_031077249.1/XP_031077200.1/XP_031077076.1/XP_031076955.1/XP_031080635.1/XP_031080695.1/XP_031079462.1/XP_031079334.1/XP_031079233.1/XP_031079022.1/XP_031084047.1/XP_031083817.1/XP_031083571.1/XP_031087533.1/XP_031087597.1/XP_031082412.1/XP_031082…	34
BP	GO:0045892	negative regulation of DNA-templated transcription	26/358	236/3915	0.179185	0.967231	0.967231	XP_031076197.1/XP_031076045.1/XP_031075968.1/XP_031075808.1/XP_031075779.1/XP_031075445.1/XP_031077989.1/XP_031077424.1/XP_031077249.1/XP_031077200.1/XP_031077076.1/XP_031080635.1/XP_031080695.1/XP_031079022.1/XP_031084047.1/XP_031083571.1/XP_031087533.1/XP_031087597.1/XP_031082799.1/XP_031082893.1/XP_031082916.1/XP_031083027.1/XP_031081529.1/XP_031081872.1/XP_031086974.1/XP_031088031.1	26
BP	GO:0006091	generation of precursor metabolites and energy	20/358	176/3915	0.179283	0.967231	0.967231	XP_031075779.1/XP_031075629.1/XP_031075183.1/XP_031074933.1/XP_031074564.1/XP_031078049.1/XP_031077138.1/XP_031080026.1/XP_031080514.1/XP_031080695.1/XP_031080879.1/XP_031079702.1/XP_031079489.1/XP_031079062.1/XP_031087527.1/XP_031082860.1/XP_031081426.1/XP_031082090.1/XP_031086811.1/XP_031088982.1	20
BP	GO:0019725	cellular homeostasis	24/358	216/3915	0.179795	0.967231	0.967231	XP_031076028.1/XP_031075974.1/XP_031075386.1/XP_031075320.1/XP_031075212.1/XP_031075086.1/XP_031077362.1/XP_031077249.1/XP_031077138.1/XP_031077076.1/XP_031079915.1/XP_031080695.1/XP_031080828.1/XP_031079696.1/XP_031079299.1/XP_031083630.1/XP_031083543.1/XP_031089719.1/XP_031089703.1/XP_031083342.1/XP_031081869.1/XP_031087019.1/XP_031088960.1/XP_031088002.1	24
BP	GO:0045005	DNA-templated DNA replication maintenance of fidelity	6/358	42/3915	0.18084	0.967231	0.967231	XP_031076045.1/XP_031077189.1/XP_031080695.1/XP_031083817.1/XP_031083571.1/XP_031087419.1	6
BP	GO:0045934	negative regulation of nucleobase-containing compound metabolic process	31/358	287/3915	0.181313	0.967231	0.967231	XP_031076197.1/XP_031076045.1/XP_031075968.1/XP_031075808.1/XP_031075779.1/XP_031075445.1/XP_031077989.1/XP_031077753.1/XP_031077424.1/XP_031077249.1/XP_031077200.1/XP_031077076.1/XP_031080635.1/XP_031080695.1/XP_031079022.1/XP_031084047.1/XP_031083817.1/XP_031083571.1/XP_031087411.1/XP_031087533.1/XP_031087597.1/XP_031087641.1/XP_031082799.1/XP_031082893.1/XP_031082916.1/XP_031083027.1/XP_031081…	31
BP	GO:0006396	RNA processing	51/358	493/3915	0.181701	0.967231	0.967231	XP_031076062.1/XP_031076000.1/XP_031075875.1/XP_031075829.1/XP_031075769.1/XP_031075508.1/XP_031075383.1/XP_031075320.1/XP_031075017.1/XP_031074813.1/XP_031074691.1/XP_031074579.1/XP_031077753.1/XP_031077730.1/XP_031077506.1/XP_031077430.1/XP_031077072.1/XP_031076958.1/XP_031080052.1/XP_031080153.1/XP_031080202.1/XP_031080635.1/XP_031080695.1/XP_031080712.1/XP_031080826.1/XP_031080834.1/XP_031079…	51
MF	GO:0003700	DNA-binding transcription factor activity	13/310	108/3385	0.185212	0.930832	0.930832	XP_031075846.1/XP_031075534.1/XP_031074849.1/XP_031077988.1/XP_031077249.1/XP_031077076.1/XP_031076726.1/XP_031080635.1/XP_031084058.1/XP_031083555.1/XP_031082859.1/XP_031082916.1/XP_031088031.1	13
CC	GO:0000152	nuclear ubiquitin ligase complex	4/343	25/3769	0.187731	0.93465	0.93465	XP_031075968.1/XP_031080895.1/XP_031081824.1/XP_031082013.1	4
CC	GO:0030446	hyphal cell wall	4/343	25/3769	0.187731	0.93465	0.93465	XP_031078096.1/XP_031083732.1/XP_031083572.1/XP_031082568.1	4
CC	GO:0000785	chromatin	32/343	300/3769	0.188253	0.93465	0.93465	XP_031076249.1/XP_031076197.1/XP_031076045.1/XP_031075968.1/XP_031075829.1/XP_031074816.1/XP_031077810.1/XP_031077753.1/XP_031077424.1/XP_031077249.1/XP_031077200.1/XP_031076726.1/XP_031080076.1/XP_031080635.1/XP_031080695.1/XP_031079462.1/XP_031084058.1/XP_031083571.1/XP_031083543.1/XP_031087411.1/XP_031087419.1/XP_031087542.1/XP_031087641.1/XP_031082799.1/XP_031082893.1/XP_031083242.1/XP_031081…	32
BP	GO:0017148	negative regulation of translation	8/358	61/3915	0.189859	0.967231	0.967231	XP_031075445.1/XP_031077854.1/XP_031077291.1/XP_031076955.1/XP_031079462.1/XP_031079334.1/XP_031079233.1/XP_031082412.1	8
BP	GO:0044403	biological process involved in symbiotic interaction	8/358	61/3915	0.189859	0.967231	0.967231	XP_031076272.1/XP_031075541.1/XP_031075320.1/XP_031078792.1/XP_031087597.1/XP_031082568.1/XP_031081891.1/XP_031086989.1	8
CC	GO:0005819	spindle	7/343	52/3769	0.189899	0.93465	0.93465	XP_031075390.1/XP_031074938.1/XP_031074871.1/XP_031080315.1/XP_031080861.1/XP_031087601.1/XP_031083242.1	7
BP	GO:0005977	glycogen metabolic process	4/358	25/3915	0.190012	0.967231	0.967231	XP_031075779.1/XP_031080514.1/XP_031080695.1/XP_031088982.1	4
BP	GO:0010970	transport along microtubule	4/358	25/3915	0.190012	0.967231	0.967231	XP_031074938.1/XP_031080861.1/XP_031080899.1/XP_031087601.1	4
BP	GO:0017001	antibiotic catabolic process	4/358	25/3915	0.190012	0.967231	0.967231	XP_031074564.1/XP_031078792.1/XP_031078697.1/XP_031086811.1	4
BP	GO:0033314	mitotic DNA replication checkpoint signaling	4/358	25/3915	0.190012	0.967231	0.967231	XP_031076045.1/XP_031083571.1/XP_031087419.1/XP_031088119.1	4
BP	GO:1901659	glycosyl compound biosynthetic process	4/358	25/3915	0.190012	0.967231	0.967231	XP_031077656.1/XP_031077506.1/XP_031082436.1/XP_031083026.1	4
BP	GO:2000045	regulation of G1/S transition of mitotic cell cycle	4/358	25/3915	0.190012	0.967231	0.967231	XP_031077760.1/XP_031080123.1/XP_031079334.1/XP_031081869.1	4
BP	GO:0000226	microtubule cytoskeleton organization	12/358	99/3915	0.190138	0.967231	0.967231	XP_031075390.1/XP_031074938.1/XP_031074871.1/XP_031077574.1/XP_031080695.1/XP_031080861.1/XP_031080899.1/XP_031079044.1/XP_031087601.1/XP_031083242.1/XP_031081739.1/XP_031081977.1	12
BP	GO:0045814	negative regulation of gene expression, epigenetic	16/358	138/3915	0.1903	0.967231	0.967231	XP_031076197.1/XP_031075968.1/XP_031075779.1/XP_031077200.1/XP_031080635.1/XP_031080695.1/XP_031079022.1/XP_031084047.1/XP_031083571.1/XP_031087533.1/XP_031087597.1/XP_031082799.1/XP_031082893.1/XP_031081529.1/XP_031081872.1/XP_031086974.1	16
MF	GO:0003684	damaged DNA binding	4/310	25/3385	0.190639	0.930832	0.930832	XP_031075200.1/XP_031083817.1/XP_031082989.1/XP_031089003.1	4
MF	GO:0008483	transaminase activity	4/310	25/3385	0.190639	0.930832	0.930832	XP_031077592.1/XP_031084212.1/XP_031081700.1/XP_031081710.1	4
MF	GO:0016769	transferase activity, transferring nitrogenous groups	4/310	25/3385	0.190639	0.930832	0.930832	XP_031077592.1/XP_031084212.1/XP_031081700.1/XP_031081710.1	4
BP	GO:0007093	mitotic cell cycle checkpoint signaling	10/358	80/3915	0.191683	0.967231	0.967231	XP_031076249.1/XP_031076045.1/XP_031075390.1/XP_031077760.1/XP_031080695.1/XP_031079334.1/XP_031083571.1/XP_031087419.1/XP_031087601.1/XP_031088119.1	10
BP	GO:0044272	sulfur compound biosynthetic process	10/358	80/3915	0.191683	0.967231	0.967231	XP_031076272.1/XP_031075541.1/XP_031075268.1/XP_031077257.1/XP_031080639.1/XP_031080661.1/XP_031080665.1/XP_031079474.1/XP_031089689.1/XP_031081891.1	10
BP	GO:0006820	anion transport	21/358	188/3915	0.192923	0.967231	0.967231	XP_031075517.1/XP_031077505.1/XP_031077362.1/XP_031080123.1/XP_031080598.1/XP_031080605.1/XP_031080824.1/XP_031080915.1/XP_031079696.1/XP_031079489.1/XP_031079319.1/XP_031079008.1/XP_031084069.1/XP_031083984.1/XP_031087564.1/XP_031087632.1/XP_031082574.1/XP_031081977.1/XP_031082027.1/XP_031086608.1/XP_031085409.1	21
BP	GO:0007051	spindle organization	7/358	52/3915	0.19315	0.967231	0.967231	XP_031075390.1/XP_031074938.1/XP_031074871.1/XP_031080695.1/XP_031087601.1/XP_031083242.1/XP_031081739.1	7
BP	GO:0030466	silent mating-type cassette heterochromatin formation	7/358	52/3915	0.19315	0.967231	0.967231	XP_031076197.1/XP_031075968.1/XP_031077200.1/XP_031083571.1/XP_031082799.1/XP_031082893.1/XP_031086974.1	7
BP	GO:0050779	RNA destabilization	7/358	52/3915	0.19315	0.967231	0.967231	XP_031075445.1/XP_031077854.1/XP_031077291.1/XP_031076955.1/XP_031079462.1/XP_031079233.1/XP_031082412.1	7
BP	GO:0061014	positive regulation of mRNA catabolic process	7/358	52/3915	0.19315	0.967231	0.967231	XP_031075445.1/XP_031077854.1/XP_031077291.1/XP_031076955.1/XP_031079462.1/XP_031079233.1/XP_031082412.1	7
BP	GO:0061157	mRNA destabilization	7/358	52/3915	0.19315	0.967231	0.967231	XP_031075445.1/XP_031077854.1/XP_031077291.1/XP_031076955.1/XP_031079462.1/XP_031079233.1/XP_031082412.1	7
BP	GO:0007186	G protein-coupled receptor signaling pathway	5/358	34/3915	0.194875	0.967231	0.967231	XP_031075320.1/XP_031080828.1/XP_031083543.1/XP_031081814.1/XP_031081869.1	5
BP	GO:0019751	polyol metabolic process	5/358	34/3915	0.194875	0.967231	0.967231	XP_031077979.1/XP_031083572.1/XP_031086574.1/XP_031088206.1/XP_031085254.1	5
BP	GO:0051303	establishment of chromosome localization	6/358	43/3915	0.195173	0.967231	0.967231	XP_031075968.1/XP_031075390.1/XP_031075215.1/XP_031074871.1/XP_031080695.1/XP_031080899.1	6
CC	GO:0070993	translation preinitiation complex	3/343	17/3769	0.196857	0.93465	0.93465	XP_031077900.1/XP_031077760.1/XP_031080493.1	3
BP	GO:1903046	meiotic cell cycle process	25/358	229/3915	0.19771	0.967231	0.967231	XP_031076249.1/XP_031076045.1/XP_031075968.1/XP_031075390.1/XP_031075215.1/XP_031074938.1/XP_031074765.1/XP_031077613.1/XP_031077603.1/XP_031077288.1/XP_031077189.1/XP_031080315.1/XP_031080695.1/XP_031080861.1/XP_031079022.1/XP_031083817.1/XP_031083732.1/XP_031087542.1/XP_031087601.1/XP_031087641.1/XP_031082671.1/XP_031082978.1/XP_031081977.1/XP_031088783.1/XP_031088031.1	25
BP	GO:0006096	glycolytic process	3/358	17/3915	0.198819	0.967231	0.967231	XP_031075629.1/XP_031077138.1/XP_031079702.1	3
BP	GO:0006656	phosphatidylcholine biosynthetic process	3/358	17/3915	0.198819	0.967231	0.967231	XP_031079008.1/XP_031082994.1/XP_031081977.1	3
BP	GO:0006757	ATP generation from ADP	3/358	17/3915	0.198819	0.967231	0.967231	XP_031075629.1/XP_031077138.1/XP_031079702.1	3
BP	GO:0018107	peptidyl-threonine phosphorylation	3/358	17/3915	0.198819	0.967231	0.967231	XP_031076045.1/XP_031074765.1/XP_031080452.1	3
BP	GO:0018210	peptidyl-threonine modification	3/358	17/3915	0.198819	0.967231	0.967231	XP_031076045.1/XP_031074765.1/XP_031080452.1	3
BP	GO:0030242	autophagy of peroxisome	3/358	17/3915	0.198819	0.967231	0.967231	XP_031075356.1/XP_031077138.1/XP_031089001.1	3
BP	GO:0048608	reproductive structure development	3/358	17/3915	0.198819	0.967231	0.967231	XP_031077286.1/XP_031080222.1/XP_031083699.1	3
BP	GO:0061458	reproductive system development	3/358	17/3915	0.198819	0.967231	0.967231	XP_031077286.1/XP_031080222.1/XP_031083699.1	3
BP	GO:0071901	negative regulation of protein serine/threonine kinase activity	3/358	17/3915	0.198819	0.967231	0.967231	XP_031076102.1/XP_031080828.1/XP_031083543.1	3
BP	GO:0140115	export across plasma membrane	3/358	17/3915	0.198819	0.967231	0.967231	XP_031075974.1/XP_031079319.1/XP_031088002.1	3
BP	GO:1900429	negative regulation of filamentous growth of a population of unicellular organisms	3/358	17/3915	0.198819	0.967231	0.967231	XP_031075320.1/XP_031083543.1/XP_031087533.1	3
BP	GO:1903828	negative regulation of protein localization	3/358	17/3915	0.198819	0.967231	0.967231	XP_031074765.1/XP_031077816.1/XP_031083630.1	3
MF	GO:0000993	RNA polymerase II complex binding	3/310	17/3385	0.199384	0.930832	0.930832	XP_031077753.1/XP_031080635.1/XP_031086938.1	3
MF	GO:0004601	peroxidase activity	3/310	17/3385	0.199384	0.930832	0.930832	XP_031078792.1/XP_031078697.1/XP_031083342.1	3
MF	GO:0004659	prenyltransferase activity	3/310	17/3385	0.199384	0.930832	0.930832	XP_031080190.1/XP_031078776.1/XP_031083060.1	3
MF	GO:0016684	oxidoreductase activity, acting on peroxide as acceptor	3/310	17/3385	0.199384	0.930832	0.930832	XP_031078792.1/XP_031078697.1/XP_031083342.1	3
MF	GO:1901505	carbohydrate derivative transmembrane transporter activity	3/310	17/3385	0.199384	0.930832	0.930832	XP_031079489.1/XP_031087453.1/XP_031082574.1	3
BP	GO:0006650	glycerophospholipid metabolic process	12/358	100/3915	0.199491	0.967231	0.967231	XP_031076028.1/XP_031075768.1/XP_031080857.1/XP_031079008.1/XP_031078906.1/XP_031084047.1/XP_031083915.1/XP_031082994.1/XP_031081977.1/XP_031086769.1/XP_031086989.1/XP_031087961.1	12
BP	GO:0065004	protein-DNA complex assembly	12/358	100/3915	0.199491	0.967231	0.967231	XP_031076197.1/XP_031075968.1/XP_031080570.1/XP_031083817.1/XP_031087419.1/XP_031087542.1/XP_031082859.1/XP_031081872.1/XP_031086838.1/XP_031086974.1/XP_031087981.1/XP_031088297.1	12
BP	GO:0009891	positive regulation of biosynthetic process	33/358	311/3915	0.200396	0.967231	0.967231	XP_031076272.1/XP_031075808.1/XP_031075541.1/XP_031075534.1/XP_031075320.1/XP_031074816.1/XP_031074691.1/XP_031077988.1/XP_031077854.1/XP_031077810.1/XP_031077753.1/XP_031077424.1/XP_031077249.1/XP_031077200.1/XP_031076955.1/XP_031076726.1/XP_031080493.1/XP_031080635.1/XP_031079008.1/XP_031084058.1/XP_031083956.1/XP_031083915.1/XP_031083699.1/XP_031083555.1/XP_031087352.1/XP_031087729.1/XP_031082…	33
BP	GO:0031328	positive regulation of cellular biosynthetic process	33/358	311/3915	0.200396	0.967231	0.967231	XP_031076272.1/XP_031075808.1/XP_031075541.1/XP_031075534.1/XP_031075320.1/XP_031074816.1/XP_031074691.1/XP_031077988.1/XP_031077854.1/XP_031077810.1/XP_031077753.1/XP_031077424.1/XP_031077249.1/XP_031077200.1/XP_031076955.1/XP_031076726.1/XP_031080493.1/XP_031080635.1/XP_031079008.1/XP_031084058.1/XP_031083956.1/XP_031083915.1/XP_031083699.1/XP_031083555.1/XP_031087352.1/XP_031087729.1/XP_031082…	33
BP	GO:0007265	Ras protein signal transduction	8/358	62/3915	0.20191	0.967231	0.967231	XP_031075390.1/XP_031075193.1/XP_031075082.1/XP_031077816.1/XP_031083543.1/XP_031083242.1/XP_031081814.1/XP_031081869.1	8
BP	GO:0010558	negative regulation of macromolecule biosynthetic process	34/358	322/3915	0.204329	0.967231	0.967231	XP_031076197.1/XP_031076045.1/XP_031075968.1/XP_031075808.1/XP_031075779.1/XP_031075445.1/XP_031077989.1/XP_031077854.1/XP_031077424.1/XP_031077291.1/XP_031077249.1/XP_031077200.1/XP_031077076.1/XP_031076955.1/XP_031080635.1/XP_031080695.1/XP_031079462.1/XP_031079334.1/XP_031079233.1/XP_031079022.1/XP_031084047.1/XP_031083817.1/XP_031083571.1/XP_031087533.1/XP_031087597.1/XP_031082412.1/XP_031082…	34
MF	GO:0032559	adenyl ribonucleotide binding	24/310	220/3385	0.205944	0.930832	0.930832	XP_031076045.1/XP_031075974.1/XP_031075320.1/XP_031075268.1/XP_031075017.1/XP_031075015.1/XP_031074813.1/XP_031074765.1/XP_031077724.1/XP_031077603.1/XP_031077189.1/XP_031077138.1/XP_031076636.1/XP_031080834.1/XP_031079334.1/XP_031079044.1/XP_031083630.1/XP_031083543.1/XP_031087711.1/XP_031082989.1/XP_031081471.1/XP_031081674.1/XP_031088783.1/XP_031089003.1	24
BP	GO:0006865	amino acid transport	7/358	53/3915	0.206394	0.967231	0.967231	XP_031080123.1/XP_031079319.1/XP_031084069.1/XP_031087632.1/XP_031082027.1/XP_031086608.1/XP_031085409.1	7
BP	GO:0050000	chromosome localization	7/358	53/3915	0.206394	0.967231	0.967231	XP_031075968.1/XP_031075390.1/XP_031075215.1/XP_031074871.1/XP_031080695.1/XP_031080899.1/XP_031087641.1	7
CC	GO:0099081	supramolecular polymer	6/343	44/3769	0.206778	0.93465	0.93465	XP_031074938.1/XP_031074871.1/XP_031077574.1/XP_031080052.1/XP_031080861.1/XP_031087601.1	6
CC	GO:0099512	supramolecular fiber	6/343	44/3769	0.206778	0.93465	0.93465	XP_031074938.1/XP_031074871.1/XP_031077574.1/XP_031080052.1/XP_031080861.1/XP_031087601.1	6
CC	GO:0099513	polymeric cytoskeletal fiber	6/343	44/3769	0.206778	0.93465	0.93465	XP_031074938.1/XP_031074871.1/XP_031077574.1/XP_031080052.1/XP_031080861.1/XP_031087601.1	6
BP	GO:0051640	organelle localization	20/358	180/3915	0.206983	0.967231	0.967231	XP_031075968.1/XP_031075390.1/XP_031075215.1/XP_031074938.1/XP_031074871.1/XP_031077138.1/XP_031080315.1/XP_031080605.1/XP_031080695.1/XP_031080861.1/XP_031080899.1/XP_031084047.1/XP_031084018.1/XP_031087564.1/XP_031087591.1/XP_031087601.1/XP_031087641.1/XP_031083242.1/XP_031086970.1/XP_031088783.1	20
BP	GO:0019220	regulation of phosphate metabolic process	19/358	170/3915	0.207147	0.967231	0.967231	XP_031076102.1/XP_031075779.1/XP_031075082.1/XP_031077753.1/XP_031077200.1/XP_031080635.1/XP_031080695.1/XP_031080828.1/XP_031079008.1/XP_031084047.1/XP_031083915.1/XP_031083630.1/XP_031083555.1/XP_031083543.1/XP_031087419.1/XP_031081471.1/XP_031081977.1/XP_031087981.1/XP_031088119.1	19
BP	GO:0051174	regulation of phosphorus metabolic process	19/358	170/3915	0.207147	0.967231	0.967231	XP_031076102.1/XP_031075779.1/XP_031075082.1/XP_031077753.1/XP_031077200.1/XP_031080635.1/XP_031080695.1/XP_031080828.1/XP_031079008.1/XP_031084047.1/XP_031083915.1/XP_031083630.1/XP_031083555.1/XP_031083543.1/XP_031087419.1/XP_031081471.1/XP_031081977.1/XP_031087981.1/XP_031088119.1	19
MF	GO:0003677	DNA binding	35/310	333/3385	0.209226	0.930832	0.930832	XP_031076249.1/XP_031076197.1/XP_031075846.1/XP_031075829.1/XP_031075534.1/XP_031075508.1/XP_031075215.1/XP_031075200.1/XP_031074849.1/XP_031077988.1/XP_031077603.1/XP_031077249.1/XP_031077200.1/XP_031077076.1/XP_031076726.1/XP_031080570.1/XP_031080771.1/XP_031079022.1/XP_031084058.1/XP_031083817.1/XP_031083772.1/XP_031083571.1/XP_031083555.1/XP_031087411.1/XP_031087542.1/XP_031087641.1/XP_031087…	35
BP	GO:1902679	negative regulation of RNA biosynthetic process	26/358	241/3915	0.209256	0.967231	0.967231	XP_031076197.1/XP_031076045.1/XP_031075968.1/XP_031075808.1/XP_031075779.1/XP_031075445.1/XP_031077989.1/XP_031077424.1/XP_031077249.1/XP_031077200.1/XP_031077076.1/XP_031080635.1/XP_031080695.1/XP_031079022.1/XP_031084047.1/XP_031083571.1/XP_031087533.1/XP_031087597.1/XP_031082799.1/XP_031082893.1/XP_031082916.1/XP_031083027.1/XP_031081529.1/XP_031081872.1/XP_031086974.1/XP_031088031.1	26
BP	GO:1903507	negative regulation of nucleic acid-templated transcription	26/358	241/3915	0.209256	0.967231	0.967231	XP_031076197.1/XP_031076045.1/XP_031075968.1/XP_031075808.1/XP_031075779.1/XP_031075445.1/XP_031077989.1/XP_031077424.1/XP_031077249.1/XP_031077200.1/XP_031077076.1/XP_031080635.1/XP_031080695.1/XP_031079022.1/XP_031084047.1/XP_031083571.1/XP_031087533.1/XP_031087597.1/XP_031082799.1/XP_031082893.1/XP_031082916.1/XP_031083027.1/XP_031081529.1/XP_031081872.1/XP_031086974.1/XP_031088031.1	26
BP	GO:0007097	nuclear migration	4/358	26/3915	0.209539	0.967231	0.967231	XP_031074938.1/XP_031080861.1/XP_031080899.1/XP_031087601.1	4
BP	GO:0042542	response to hydrogen peroxide	4/358	26/3915	0.209539	0.967231	0.967231	XP_031079334.1/XP_031078792.1/XP_031086937.1/XP_031088960.1	4
BP	GO:0051647	nucleus localization	4/358	26/3915	0.209539	0.967231	0.967231	XP_031074938.1/XP_031080861.1/XP_031080899.1/XP_031087601.1	4
BP	GO:0051648	vesicle localization	4/358	26/3915	0.209539	0.967231	0.967231	XP_031080315.1/XP_031080899.1/XP_031087591.1/XP_031086970.1	4
BP	GO:0051650	establishment of vesicle localization	4/358	26/3915	0.209539	0.967231	0.967231	XP_031080315.1/XP_031080899.1/XP_031087591.1/XP_031086970.1	4
BP	GO:1902806	regulation of cell cycle G1/S phase transition	4/358	26/3915	0.209539	0.967231	0.967231	XP_031077760.1/XP_031080123.1/XP_031079334.1/XP_031081869.1	4
BP	GO:0051098	regulation of binding	5/358	35/3915	0.2116	0.967231	0.967231	XP_031075445.1/XP_031074765.1/XP_031080123.1/XP_031083817.1/XP_031088297.1	5
BP	GO:0048468	cell development	14/358	121/3915	0.212733	0.967231	0.967231	XP_031076249.1/XP_031075320.1/XP_031077816.1/XP_031077613.1/XP_031077288.1/XP_031080222.1/XP_031080315.1/XP_031080695.1/XP_031083732.1/XP_031083699.1/XP_031082978.1/XP_031081891.1/XP_031081977.1/XP_031088783.1	14
BP	GO:0048878	chemical homeostasis	22/358	201/3915	0.212997	0.967231	0.967231	XP_031076028.1/XP_031075974.1/XP_031075386.1/XP_031075320.1/XP_031075212.1/XP_031075086.1/XP_031077362.1/XP_031077249.1/XP_031077138.1/XP_031077076.1/XP_031079915.1/XP_031080695.1/XP_031080828.1/XP_031079696.1/XP_031079299.1/XP_031083630.1/XP_031083543.1/XP_031089703.1/XP_031081869.1/XP_031087019.1/XP_031088960.1/XP_031088002.1	22
BP	GO:0051656	establishment of organelle localization	15/358	131/3915	0.213776	0.967231	0.967231	XP_031075968.1/XP_031075390.1/XP_031075215.1/XP_031074938.1/XP_031074871.1/XP_031080315.1/XP_031080695.1/XP_031080861.1/XP_031080899.1/XP_031087564.1/XP_031087591.1/XP_031087601.1/XP_031083242.1/XP_031086970.1/XP_031088783.1	15
CC	GO:0005694	chromosome	43/343	420/3769	0.218366	0.93465	0.93465	XP_031076249.1/XP_031076197.1/XP_031076045.1/XP_031075968.1/XP_031075829.1/XP_031075390.1/XP_031075200.1/XP_031074871.1/XP_031074816.1/XP_031077810.1/XP_031077753.1/XP_031077603.1/XP_031077424.1/XP_031077249.1/XP_031077200.1/XP_031077189.1/XP_031076726.1/XP_031080052.1/XP_031080076.1/XP_031080635.1/XP_031080695.1/XP_031080899.1/XP_031079462.1/XP_031079022.1/XP_031084058.1/XP_031083817.1/XP_031083…	43
MF	GO:0030554	adenyl nucleotide binding	24/310	222/3385	0.219168	0.930832	0.930832	XP_031076045.1/XP_031075974.1/XP_031075320.1/XP_031075268.1/XP_031075017.1/XP_031075015.1/XP_031074813.1/XP_031074765.1/XP_031077724.1/XP_031077603.1/XP_031077189.1/XP_031077138.1/XP_031076636.1/XP_031080834.1/XP_031079334.1/XP_031079044.1/XP_031083630.1/XP_031083543.1/XP_031087711.1/XP_031082989.1/XP_031081471.1/XP_031081674.1/XP_031088783.1/XP_031089003.1	24
BP	GO:0009260	ribonucleotide biosynthetic process	9/358	73/3915	0.219873	0.967231	0.967231	XP_031075629.1/XP_031077889.1/XP_031077656.1/XP_031077138.1/XP_031079702.1/XP_031079474.1/XP_031089689.1/XP_031083026.1/XP_031081674.1	9
BP	GO:0051445	regulation of meiotic cell cycle	9/358	73/3915	0.219873	0.967231	0.967231	XP_031076045.1/XP_031074765.1/XP_031084058.1/XP_031083817.1/XP_031083543.1/XP_031087641.1/XP_031082799.1/XP_031081471.1/XP_031088031.1	9
BP	GO:0140719	constitutive heterochromatin formation	7/358	54/3915	0.219971	0.967231	0.967231	XP_031076197.1/XP_031075968.1/XP_031077200.1/XP_031083571.1/XP_031082799.1/XP_031082893.1/XP_031086974.1	7
CC	GO:0000124	SAGA complex	3/343	18/3769	0.221386	0.93465	0.93465	XP_031074816.1/XP_031081872.1/XP_031086838.1	3
CC	GO:0005875	microtubule associated complex	3/343	18/3769	0.221386	0.93465	0.93465	XP_031074871.1/XP_031080052.1/XP_031080899.1	3
CC	GO:0005881	cytoplasmic microtubule	3/343	18/3769	0.221386	0.93465	0.93465	XP_031074938.1/XP_031080861.1/XP_031087601.1	3
CC	GO:0005940	septin ring	3/343	18/3769	0.221386	0.93465	0.93465	XP_031079044.1/XP_031087641.1/XP_031081814.1	3
CC	GO:0045121	membrane raft	3/343	18/3769	0.221386	0.93465	0.93465	XP_031075974.1/XP_031079947.1/XP_031082978.1	3
CC	GO:0046695	SLIK (SAGA-like) complex	3/343	18/3769	0.221386	0.93465	0.93465	XP_031074816.1/XP_031081872.1/XP_031086838.1	3
CC	GO:0098857	membrane microdomain	3/343	18/3769	0.221386	0.93465	0.93465	XP_031075974.1/XP_031079947.1/XP_031082978.1	3
BP	GO:0000147	actin cortical patch assembly	3/358	18/3915	0.223524	0.967231	0.967231	XP_031077613.1/XP_031082939.1/XP_031088783.1	3
BP	GO:0031122	cytoplasmic microtubule organization	3/358	18/3915	0.223524	0.967231	0.967231	XP_031074938.1/XP_031077574.1/XP_031080861.1	3
BP	GO:0032388	positive regulation of intracellular transport	3/358	18/3915	0.223524	0.967231	0.967231	XP_031083543.1/XP_031089703.1/XP_031083242.1	3
BP	GO:0033212	iron import into cell	3/358	18/3915	0.223524	0.967231	0.967231	XP_031075386.1/XP_031079696.1/XP_031079299.1	3
BP	GO:0046825	regulation of protein export from nucleus	3/358	18/3915	0.223524	0.967231	0.967231	XP_031083543.1/XP_031089703.1/XP_031083242.1	3
BP	GO:0060258	negative regulation of filamentous growth	3/358	18/3915	0.223524	0.967231	0.967231	XP_031075320.1/XP_031083543.1/XP_031087533.1	3
BP	GO:0062014	negative regulation of small molecule metabolic process	3/358	18/3915	0.223524	0.967231	0.967231	XP_031077249.1/XP_031080120.1/XP_031079008.1	3
BP	GO:0098659	inorganic cation import across plasma membrane	3/358	18/3915	0.223524	0.967231	0.967231	XP_031080975.1/XP_031079299.1/XP_031078721.1	3
BP	GO:0099587	inorganic ion import across plasma membrane	3/358	18/3915	0.223524	0.967231	0.967231	XP_031080975.1/XP_031079299.1/XP_031078721.1	3
MF	GO:0001217	DNA-binding transcription repressor activity	3/310	18/3385	0.224149	0.930832	0.930832	XP_031077249.1/XP_031077076.1/XP_031082916.1	3
MF	GO:0001227	DNA-binding transcription repressor activity, RNA polymerase II-specific	3/310	18/3385	0.224149	0.930832	0.930832	XP_031077249.1/XP_031077076.1/XP_031082916.1	3
MF	GO:0005548	phospholipid transporter activity	3/310	18/3385	0.224149	0.930832	0.930832	XP_031080598.1/XP_031079008.1/XP_031081977.1	3
MF	GO:0015103	inorganic anion transmembrane transporter activity	3/310	18/3385	0.224149	0.930832	0.930832	XP_031075517.1/XP_031077505.1/XP_031077362.1	3
BP	GO:0000288	nuclear-transcribed mRNA catabolic process, deadenylation-dependent decay	6/358	45/3915	0.22504	0.967231	0.967231	XP_031075445.1/XP_031077854.1/XP_031077291.1/XP_031076955.1/XP_031079233.1/XP_031082412.1	6
BP	GO:0043547	positive regulation of GTPase activity	6/358	45/3915	0.22504	0.967231	0.967231	XP_031075193.1/XP_031075082.1/XP_031077574.1/XP_031080123.1/XP_031079517.1/XP_031086970.1	6
BP	GO:0044106	cellular amine metabolic process	6/358	45/3915	0.22504	0.967231	0.967231	XP_031076272.1/XP_031075541.1/XP_031079062.1/XP_031078681.1/XP_031082916.1/XP_031081891.1	6
MF	GO:0043130	ubiquitin binding	6/310	45/3385	0.225917	0.930832	0.930832	XP_031075417.1/XP_031077291.1/XP_031080895.1/XP_031089719.1/XP_031086838.1/XP_031089001.1	6
BP	GO:0006164	purine nucleotide biosynthetic process	8/358	64/3915	0.226895	0.967231	0.967231	XP_031075629.1/XP_031077889.1/XP_031077138.1/XP_031079702.1/XP_031079474.1/XP_031089689.1/XP_031083026.1/XP_031081674.1	8
BP	GO:0009152	purine ribonucleotide biosynthetic process	8/358	64/3915	0.226895	0.967231	0.967231	XP_031075629.1/XP_031077889.1/XP_031077138.1/XP_031079702.1/XP_031079474.1/XP_031089689.1/XP_031083026.1/XP_031081674.1	8
BP	GO:0007127	meiosis I	12/358	103/3915	0.228737	0.967231	0.967231	XP_031076249.1/XP_031075968.1/XP_031075215.1/XP_031074938.1/XP_031077603.1/XP_031080861.1/XP_031079022.1/XP_031083817.1/XP_031087601.1/XP_031087641.1/XP_031082671.1/XP_031088031.1	12
BP	GO:0019674	NAD metabolic process	5/358	36/3915	0.228765	0.967231	0.967231	XP_031077138.1/XP_031079702.1/XP_031082860.1/XP_031086811.1/XP_031085254.1	5
BP	GO:0043618	regulation of transcription from RNA polymerase II promoter in response to stress	5/358	36/3915	0.228765	0.967231	0.967231	XP_031075534.1/XP_031075320.1/XP_031074849.1/XP_031077076.1/XP_031088031.1	5
BP	GO:0043620	regulation of DNA-templated transcription in response to stress	5/358	36/3915	0.228765	0.967231	0.967231	XP_031075534.1/XP_031075320.1/XP_031074849.1/XP_031077076.1/XP_031088031.1	5
CC	GO:0071162	CMG complex	2/343	10/3769	0.22919	0.93465	0.93465	XP_031087542.1/XP_031086974.1	2
CC	GO:1902716	cell cortex of growing cell tip	2/343	10/3769	0.22919	0.93465	0.93465	XP_031075082.1/XP_031081814.1	2
BP	GO:0030705	cytoskeleton-dependent intracellular transport	4/358	27/3915	0.229605	0.967231	0.967231	XP_031074938.1/XP_031080861.1/XP_031080899.1/XP_031087601.1	4
BP	GO:0043650	dicarboxylic acid biosynthetic process	4/358	27/3915	0.229605	0.967231	0.967231	XP_031078049.1/XP_031077989.1/XP_031077592.1/XP_031080117.1	4
BP	GO:0044818	mitotic G2/M transition checkpoint	4/358	27/3915	0.229605	0.967231	0.967231	XP_031076045.1/XP_031083571.1/XP_031087419.1/XP_031088119.1	4
BP	GO:0045727	positive regulation of translation	4/358	27/3915	0.229605	0.967231	0.967231	XP_031080493.1/XP_031083956.1/XP_031087352.1/XP_031087729.1	4
BP	GO:0048731	system development	4/358	27/3915	0.229605	0.967231	0.967231	XP_031077816.1/XP_031077286.1/XP_031080222.1/XP_031083699.1	4
BP	GO:0099111	microtubule-based transport	4/358	27/3915	0.229605	0.967231	0.967231	XP_031074938.1/XP_031080861.1/XP_031080899.1/XP_031087601.1	4
BP	GO:0016071	mRNA metabolic process	29/358	275/3915	0.229777	0.967231	0.967231	XP_031076197.1/XP_031076062.1/XP_031075829.1/XP_031075769.1/XP_031075445.1/XP_031075383.1/XP_031074579.1/XP_031077854.1/XP_031077753.1/XP_031077430.1/XP_031077291.1/XP_031076958.1/XP_031076955.1/XP_031080202.1/XP_031080635.1/XP_031080826.1/XP_031079462.1/XP_031079389.1/XP_031079233.1/XP_031089703.1/XP_031082412.1/XP_031082451.1/XP_031082685.1/XP_031082739.1/XP_031086938.1/XP_031087072.1/XP_031087…	29
BP	GO:0006399	tRNA metabolic process	19/358	173/3915	0.229844	0.967231	0.967231	XP_031076062.1/XP_031075775.1/XP_031075320.1/XP_031075096.1/XP_031075015.1/XP_031074932.1/XP_031074813.1/XP_031077506.1/XP_031077072.1/XP_031076636.1/XP_031079936.1/XP_031080052.1/XP_031080712.1/XP_031080826.1/XP_031079500.1/XP_031079462.1/XP_031087352.1/XP_031087361.1/XP_031082064.1	19
BP	GO:0043085	positive regulation of catalytic activity	19/358	173/3915	0.229844	0.967231	0.967231	XP_031075193.1/XP_031075082.1/XP_031077574.1/XP_031077563.1/XP_031077216.1/XP_031077200.1/XP_031076958.1/XP_031080123.1/XP_031079517.1/XP_031079022.1/XP_031083915.1/XP_031083543.1/XP_031087419.1/XP_031081471.1/XP_031081872.1/XP_031082013.1/XP_031086970.1/XP_031087981.1/XP_031088119.1	19
BP	GO:1901700	response to oxygen-containing compound	13/358	113/3915	0.230049	0.967231	0.967231	XP_031075320.1/XP_031077138.1/XP_031080117.1/XP_031080828.1/XP_031079334.1/XP_031078792.1/XP_031078697.1/XP_031083630.1/XP_031083543.1/XP_031081869.1/XP_031086811.1/XP_031086937.1/XP_031088960.1	13
MF	GO:0005216	ion channel activity	4/310	27/3385	0.230345	0.930832	0.930832	XP_031077635.1/XP_031077362.1/XP_031077325.1/XP_031082027.1	4
BP	GO:0000073	initial mitotic spindle pole body separation	2/358	10/3915	0.230866	0.967231	0.967231	XP_031074871.1/XP_031087601.1	2
BP	GO:0006071	glycerol metabolic process	2/358	10/3915	0.230866	0.967231	0.967231	XP_031088206.1/XP_031085254.1	2
BP	GO:0010958	regulation of amino acid import across plasma membrane	2/358	10/3915	0.230866	0.967231	0.967231	XP_031080123.1/XP_031085409.1	2
BP	GO:0030031	cell projection assembly	2/358	10/3915	0.230866	0.967231	0.967231	XP_031075082.1/XP_031081814.1	2
BP	GO:0031452	negative regulation of heterochromatin formation	2/358	10/3915	0.230866	0.967231	0.967231	XP_031082799.1/XP_031082893.1	2
BP	GO:0032120	ascospore-type prospore membrane formation	2/358	10/3915	0.230866	0.967231	0.967231	XP_031077288.1/XP_031080315.1	2
BP	GO:0035542	regulation of SNARE complex assembly	2/358	10/3915	0.230866	0.967231	0.967231	XP_031084018.1/XP_031087591.1	2
BP	GO:0042135	neurotransmitter catabolic process	2/358	10/3915	0.230866	0.967231	0.967231	XP_031074995.1/XP_031081700.1	2
BP	GO:0042306	regulation of protein import into nucleus	2/358	10/3915	0.230866	0.967231	0.967231	XP_031076272.1/XP_031089703.1	2
BP	GO:0043605	cellular amide catabolic process	2/358	10/3915	0.230866	0.967231	0.967231	XP_031082916.1/XP_031081700.1	2
BP	GO:0048478	replication fork protection	2/358	10/3915	0.230866	0.967231	0.967231	XP_031076045.1/XP_031083571.1	2
BP	GO:0051567	histone H3-K9 methylation	2/358	10/3915	0.230866	0.967231	0.967231	XP_031075968.1/XP_031081529.1	2
BP	GO:0071072	negative regulation of phospholipid biosynthetic process	2/358	10/3915	0.230866	0.967231	0.967231	XP_031079008.1/XP_031081977.1	2
BP	GO:0071619	phosphorylation of RNA polymerase II C-terminal domain serine 2 residues	2/358	10/3915	0.230866	0.967231	0.967231	XP_031077753.1/XP_031080635.1	2
BP	GO:0090158	endoplasmic reticulum membrane organization	2/358	10/3915	0.230866	0.967231	0.967231	XP_031084047.1/XP_031082585.1	2
BP	GO:0110100	spindle pole body separation	2/358	10/3915	0.230866	0.967231	0.967231	XP_031074871.1/XP_031087601.1	2
BP	GO:0120262	negative regulation of heterochromatin organization	2/358	10/3915	0.230866	0.967231	0.967231	XP_031082799.1/XP_031082893.1	2
BP	GO:1903726	negative regulation of phospholipid metabolic process	2/358	10/3915	0.230866	0.967231	0.967231	XP_031079008.1/XP_031081977.1	2
BP	GO:1903789	regulation of amino acid transmembrane transport	2/358	10/3915	0.230866	0.967231	0.967231	XP_031080123.1/XP_031085409.1	2
BP	GO:1904589	regulation of protein import	2/358	10/3915	0.230866	0.967231	0.967231	XP_031076272.1/XP_031089703.1	2
BP	GO:1905047	mitotic spindle pole body organization	2/358	10/3915	0.230866	0.967231	0.967231	XP_031074871.1/XP_031087601.1	2
BP	GO:1990151	protein localization to cell tip	2/358	10/3915	0.230866	0.967231	0.967231	XP_031080695.1/XP_031083630.1	2
BP	GO:1990456	mitochondrion-endoplasmic reticulum membrane tethering	2/358	10/3915	0.230866	0.967231	0.967231	XP_031080605.1/XP_031087564.1	2
BP	GO:2000114	regulation of establishment of cell polarity	2/358	10/3915	0.230866	0.967231	0.967231	XP_031080695.1/XP_031083630.1	2
BP	GO:2001021	negative regulation of response to DNA damage stimulus	2/358	10/3915	0.230866	0.967231	0.967231	XP_031087641.1/XP_031088119.1	2
MF	GO:0015298	solute:cation antiporter activity	2/310	10/3385	0.231378	0.930832	0.930832	XP_031077325.1/XP_031079696.1	2
MF	GO:0016413	O-acetyltransferase activity	2/310	10/3385	0.231378	0.930832	0.930832	XP_031074392.1/XP_031078929.1	2
MF	GO:0016646	oxidoreductase activity, acting on the CH-NH group of donors, NAD or NADP as acceptor	2/310	10/3385	0.231378	0.930832	0.930832	XP_031075183.1/XP_031077257.1	2
MF	GO:0016878	acid-thiol ligase activity	2/310	10/3385	0.231378	0.930832	0.930832	XP_031075967.1/XP_031082090.1	2
MF	GO:0022836	gated channel activity	2/310	10/3385	0.231378	0.930832	0.930832	XP_031077635.1/XP_031077362.1	2
MF	GO:0035251	UDP-glucosyltransferase activity	2/310	10/3385	0.231378	0.930832	0.930832	XP_031080514.1/XP_031078995.1	2
CC	GO:0005937	mating projection	12/343	104/3769	0.233732	0.93465	0.93465	XP_031075768.1/XP_031075193.1/XP_031075082.1/XP_031077613.1/XP_031080315.1/XP_031080695.1/XP_031083630.1/XP_031082939.1/XP_031083015.1/XP_031081814.1/XP_031081869.1/XP_031081928.1	12
MF	GO:0005524	ATP binding	23/310	214/3385	0.234201	0.93148	0.93148	XP_031076045.1/XP_031075974.1/XP_031075320.1/XP_031075268.1/XP_031075017.1/XP_031075015.1/XP_031074813.1/XP_031074765.1/XP_031077724.1/XP_031077603.1/XP_031077189.1/XP_031077138.1/XP_031076636.1/XP_031080834.1/XP_031079334.1/XP_031079044.1/XP_031083630.1/XP_031087711.1/XP_031082989.1/XP_031081471.1/XP_031081674.1/XP_031088783.1/XP_031089003.1	23
BP	GO:0044264	cellular polysaccharide metabolic process	10/358	84/3915	0.23508	0.967231	0.967231	XP_031075883.1/XP_031075779.1/XP_031075652.1/XP_031078096.1/XP_031080514.1/XP_031080695.1/XP_031078995.1/XP_031083732.1/XP_031081814.1/XP_031088982.1	10
BP	GO:0044283	small molecule biosynthetic process	37/358	359/3915	0.236927	0.967231	0.967231	XP_031076272.1/XP_031075629.1/XP_031075541.1/XP_031075183.1/XP_031075120.1/XP_031078049.1/XP_031077989.1/XP_031077765.1/XP_031077656.1/XP_031077623.1/XP_031077592.1/XP_031077586.1/XP_031077257.1/XP_031077235.1/XP_031077138.1/XP_031080038.1/XP_031080117.1/XP_031080120.1/XP_031080639.1/XP_031080665.1/XP_031080828.1/XP_031080872.1/XP_031079702.1/XP_031079474.1/XP_031079062.1/XP_031079008.1/XP_031078…	37
BP	GO:0042327	positive regulation of phosphorylation	8/358	65/3915	0.23979	0.967231	0.967231	XP_031075082.1/XP_031077753.1/XP_031077200.1/XP_031080635.1/XP_031083915.1/XP_031087419.1/XP_031081471.1/XP_031088119.1	8
BP	GO:0000375	RNA splicing, via transesterification reactions	16/358	144/3915	0.239837	0.967231	0.967231	XP_031075829.1/XP_031075769.1/XP_031075383.1/XP_031074813.1/XP_031074579.1/XP_031077430.1/XP_031076958.1/XP_031080202.1/XP_031079389.1/XP_031089703.1/XP_031082451.1/XP_031082685.1/XP_031082739.1/XP_031087072.1/XP_031087959.1/XP_031088315.1	16
BP	GO:0044703	multi-organism reproductive process	16/358	144/3915	0.239837	0.967231	0.967231	XP_031076249.1/XP_031075193.1/XP_031075082.1/XP_031077613.1/XP_031077288.1/XP_031077286.1/XP_031080222.1/XP_031080315.1/XP_031080695.1/XP_031083732.1/XP_031082978.1/XP_031081814.1/XP_031081869.1/XP_031081928.1/XP_031081977.1/XP_031088783.1	16
BP	GO:0140013	meiotic nuclear division	14/358	124/3915	0.240117	0.967231	0.967231	XP_031076249.1/XP_031076045.1/XP_031075968.1/XP_031075215.1/XP_031074938.1/XP_031074765.1/XP_031077603.1/XP_031080861.1/XP_031079022.1/XP_031083817.1/XP_031087601.1/XP_031087641.1/XP_031082671.1/XP_031088031.1	14
BP	GO:0033692	cellular polysaccharide biosynthetic process	6/358	46/3915	0.240505	0.967231	0.967231	XP_031075652.1/XP_031080514.1/XP_031078995.1/XP_031083732.1/XP_031081814.1/XP_031088982.1	6
CC	GO:0005886	plasma membrane	42/343	414/3769	0.241171	0.93465	0.93465	XP_031076272.1/XP_031076102.1/XP_031075982.1/XP_031075974.1/XP_031075932.1/XP_031075660.1/XP_031075629.1/XP_031075541.1/XP_031075517.1/XP_031075386.1/XP_031075086.1/XP_031074933.1/XP_031078096.1/XP_031077765.1/XP_031077724.1/XP_031077596.1/XP_031077505.1/XP_031077362.1/XP_031079947.1/XP_031080296.1/XP_031080598.1/XP_031080975.1/XP_031079702.1/XP_031079696.1/XP_031079364.1/XP_031079299.1/XP_031078…	42
CC	GO:1990234	transferase complex	33/343	320/3769	0.242417	0.93465	0.93465	XP_031076000.1/XP_031075968.1/XP_031075808.1/XP_031075198.1/XP_031075138.1/XP_031075096.1/XP_031074932.1/XP_031074816.1/XP_031077753.1/XP_031077424.1/XP_031077138.1/XP_031089054.1/XP_031079951.1/XP_031080120.1/XP_031080135.1/XP_031080190.1/XP_031080635.1/XP_031080895.1/XP_031083915.1/XP_031083543.1/XP_031082799.1/XP_031082859.1/XP_031082989.1/XP_031083060.1/XP_031081705.1/XP_031081824.1/XP_031081…	33
MF	GO:0015075	ion transmembrane transporter activity	22/310	205/3385	0.242863	0.932611	0.932611	XP_031075974.1/XP_031075517.1/XP_031075212.1/XP_031077635.1/XP_031077505.1/XP_031077362.1/XP_031077325.1/XP_031079915.1/XP_031080824.1/XP_031080915.1/XP_031080975.1/XP_031079696.1/XP_031079489.1/XP_031079319.1/XP_031078721.1/XP_031084069.1/XP_031083984.1/XP_031087632.1/XP_031082574.1/XP_031082027.1/XP_031086608.1/XP_031088002.1	22
CC	GO:0042763	intracellular immature spore	7/343	56/3769	0.244189	0.93465	0.93465	XP_031075660.1/XP_031074765.1/XP_031077288.1/XP_031080315.1/XP_031079008.1/XP_031083732.1/XP_031081977.1	7
CC	GO:0042764	ascospore-type prospore	7/343	56/3769	0.244189	0.93465	0.93465	XP_031075660.1/XP_031074765.1/XP_031077288.1/XP_031080315.1/XP_031079008.1/XP_031083732.1/XP_031081977.1	7
BP	GO:0031667	response to nutrient levels	24/358	226/3915	0.245285	0.967231	0.967231	XP_031075779.1/XP_031075541.1/XP_031075534.1/XP_031075386.1/XP_031075320.1/XP_031077988.1/XP_031077765.1/XP_031077505.1/XP_031077249.1/XP_031077076.1/XP_031076726.1/XP_031080117.1/XP_031080828.1/XP_031079334.1/XP_031078792.1/XP_031083555.1/XP_031083543.1/XP_031087597.1/XP_031082731.1/XP_031082916.1/XP_031081700.1/XP_031081869.1/XP_031088871.1/XP_031088960.1	24
BP	GO:1903829	positive regulation of protein localization	5/358	37/3915	0.246319	0.967231	0.967231	XP_031080695.1/XP_031083543.1/XP_031089703.1/XP_031083242.1/XP_031085409.1	5
BP	GO:0000722	telomere maintenance via recombination	3/358	19/3915	0.248786	0.967231	0.967231	XP_031079022.1/XP_031083817.1/XP_031087641.1	3
BP	GO:0006895	Golgi to endosome transport	3/358	19/3915	0.248786	0.967231	0.967231	XP_031075417.1/XP_031080222.1/XP_031087591.1	3
BP	GO:0009410	response to xenobiotic stimulus	3/358	19/3915	0.248786	0.967231	0.967231	XP_031074849.1/XP_031080123.1/XP_031080734.1	3
BP	GO:0000959	mitochondrial RNA metabolic process	4/358	28/3915	0.250123	0.967231	0.967231	XP_031075015.1/XP_031074813.1/XP_031076636.1/XP_031080826.1	4
BP	GO:0006112	energy reserve metabolic process	4/358	28/3915	0.250123	0.967231	0.967231	XP_031075779.1/XP_031080514.1/XP_031080695.1/XP_031088982.1	4
BP	GO:0072348	sulfur compound transport	4/358	28/3915	0.250123	0.967231	0.967231	XP_031075517.1/XP_031077505.1/XP_031079696.1/XP_031082574.1	4
MF	GO:0008017	microtubule binding	4/310	28/3385	0.250919	0.932611	0.932611	XP_031074871.1/XP_031080052.1/XP_031080899.1/XP_031087601.1	4
BP	GO:0043648	dicarboxylic acid metabolic process	8/358	66/3915	0.252928	0.967231	0.967231	XP_031074995.1/XP_031078049.1/XP_031077989.1/XP_031077592.1/XP_031080117.1/XP_031087527.1/XP_031081426.1/XP_031081700.1	8
BP	GO:0000271	polysaccharide biosynthetic process	6/358	47/3915	0.256278	0.967231	0.967231	XP_031075652.1/XP_031080514.1/XP_031078995.1/XP_031083732.1/XP_031081814.1/XP_031088982.1	6
BP	GO:0009719	response to endogenous stimulus	6/358	47/3915	0.256278	0.967231	0.967231	XP_031076045.1/XP_031075390.1/XP_031077189.1/XP_031079334.1/XP_031083571.1/XP_031082916.1	6
BP	GO:0016485	protein processing	6/358	47/3915	0.256278	0.967231	0.967231	XP_031076272.1/XP_031075541.1/XP_031074933.1/XP_031079610.1/XP_031081891.1/XP_031089001.1	6
BP	GO:0071495	cellular response to endogenous stimulus	6/358	47/3915	0.256278	0.967231	0.967231	XP_031076045.1/XP_031075390.1/XP_031077189.1/XP_031079334.1/XP_031083571.1/XP_031082916.1	6
MF	GO:0032182	ubiquitin-like protein binding	6/310	47/3385	0.257263	0.932611	0.932611	XP_031075417.1/XP_031077291.1/XP_031080895.1/XP_031089719.1/XP_031086838.1/XP_031089001.1	6
BP	GO:0031137	regulation of conjugation with cellular fusion	10/358	86/3915	0.258053	0.967231	0.967231	XP_031075320.1/XP_031075193.1/XP_031075082.1/XP_031074765.1/XP_031077854.1/XP_031080598.1/XP_031079610.1/XP_031082916.1/XP_031081814.1/XP_031081869.1	10
BP	GO:0048646	anatomical structure formation involved in morphogenesis	14/358	126/3915	0.259115	0.967231	0.967231	XP_031076272.1/XP_031076249.1/XP_031075320.1/XP_031075082.1/XP_031077613.1/XP_031077288.1/XP_031080315.1/XP_031080695.1/XP_031083732.1/XP_031082978.1/XP_031081814.1/XP_031081891.1/XP_031081977.1/XP_031088783.1	14
CC	GO:0099080	supramolecular complex	20/343	188/3769	0.260587	0.93465	0.93465	XP_031075875.1/XP_031075390.1/XP_031075268.1/XP_031074938.1/XP_031074871.1/XP_031077900.1/XP_031077854.1/XP_031077760.1/XP_031077574.1/XP_031077235.1/XP_031076955.1/XP_031079936.1/XP_031080052.1/XP_031080695.1/XP_031080861.1/XP_031080899.1/XP_031087601.1/XP_031087729.1/XP_031082412.1/XP_031081739.1	20
BP	GO:0051253	negative regulation of RNA metabolic process	26/358	249/3915	0.262072	0.967231	0.967231	XP_031076197.1/XP_031076045.1/XP_031075968.1/XP_031075808.1/XP_031075779.1/XP_031075445.1/XP_031077989.1/XP_031077424.1/XP_031077249.1/XP_031077200.1/XP_031077076.1/XP_031080635.1/XP_031080695.1/XP_031079022.1/XP_031084047.1/XP_031083571.1/XP_031087533.1/XP_031087597.1/XP_031082799.1/XP_031082893.1/XP_031082916.1/XP_031083027.1/XP_031081529.1/XP_031081872.1/XP_031086974.1/XP_031088031.1	26
BP	GO:0001510	RNA methylation	5/358	38/3915	0.264209	0.967231	0.967231	XP_031075320.1/XP_031079223.1/XP_031084345.1/XP_031082064.1/XP_031086923.1	5
BP	GO:0043628	small regulatory ncRNA 3'-end processing	5/358	38/3915	0.264209	0.967231	0.967231	XP_031080635.1/XP_031080826.1/XP_031079462.1/XP_031087361.1/XP_031086923.1	5
CC	GO:0030118	clathrin coat	2/343	11/3769	0.264321	0.93465	0.93465	XP_031077596.1/XP_031079142.1	2
CC	GO:0030125	clathrin vesicle coat	2/343	11/3769	0.264321	0.93465	0.93465	XP_031077596.1/XP_031079142.1	2
CC	GO:0090726	cortical dynamic polarity patch	2/343	11/3769	0.264321	0.93465	0.93465	XP_031075193.1/XP_031081814.1	2
CC	GO:0005681	spliceosomal complex	12/343	107/3769	0.264679	0.93465	0.93465	XP_031075829.1/XP_031075769.1/XP_031075383.1/XP_031074579.1/XP_031077430.1/XP_031080202.1/XP_031079389.1/XP_031082451.1/XP_031082739.1/XP_031087072.1/XP_031087959.1/XP_031088315.1	12
BP	GO:0015711	organic anion transport	17/358	157/3915	0.264964	0.967231	0.967231	XP_031080123.1/XP_031080598.1/XP_031080605.1/XP_031080824.1/XP_031080915.1/XP_031079696.1/XP_031079489.1/XP_031079319.1/XP_031079008.1/XP_031084069.1/XP_031083984.1/XP_031087564.1/XP_031087632.1/XP_031082574.1/XP_031081977.1/XP_031082027.1/XP_031086608.1	17
BP	GO:0000019	regulation of mitotic recombination	2/358	11/3915	0.266182	0.967231	0.967231	XP_031087641.1/XP_031089003.1	2
BP	GO:0000909	sporocarp development involved in sexual reproduction	2/358	11/3915	0.266182	0.967231	0.967231	XP_031077286.1/XP_031080222.1	2
BP	GO:0005978	glycogen biosynthetic process	2/358	11/3915	0.266182	0.967231	0.967231	XP_031080514.1/XP_031088982.1	2
BP	GO:0006067	ethanol metabolic process	2/358	11/3915	0.266182	0.967231	0.967231	XP_031079062.1/XP_031086811.1	2
BP	GO:0006085	acetyl-CoA biosynthetic process	2/358	11/3915	0.266182	0.967231	0.967231	XP_031079474.1/XP_031089689.1	2
BP	GO:0006882	cellular zinc ion homeostasis	2/358	11/3915	0.266182	0.967231	0.967231	XP_031077076.1/XP_031079915.1	2
BP	GO:0007008	outer mitochondrial membrane organization	2/358	11/3915	0.266182	0.967231	0.967231	XP_031087564.1/XP_031083105.1	2
BP	GO:0010515	negative regulation of induction of conjugation with cellular fusion	2/358	11/3915	0.266182	0.967231	0.967231	XP_031074765.1/XP_031082916.1	2
BP	GO:0015891	siderophore transport	2/358	11/3915	0.266182	0.967231	0.967231	XP_031075386.1/XP_031079696.1	2
BP	GO:0031146	SCF-dependent proteasomal ubiquitin-dependent protein catabolic process	2/358	11/3915	0.266182	0.967231	0.967231	XP_031075198.1/XP_031080895.1	2
BP	GO:0033523	histone H2B ubiquitination	2/358	11/3915	0.266182	0.967231	0.967231	XP_031077753.1/XP_031080635.1	2
BP	GO:0035384	thioester biosynthetic process	2/358	11/3915	0.266182	0.967231	0.967231	XP_031079474.1/XP_031089689.1	2
BP	GO:0043271	negative regulation of ion transport	2/358	11/3915	0.266182	0.967231	0.967231	XP_031077249.1/XP_031085409.1	2
BP	GO:0043619	regulation of transcription from RNA polymerase II promoter in response to oxidative stress	2/358	11/3915	0.266182	0.967231	0.967231	XP_031075320.1/XP_031074849.1	2
BP	GO:0051569	regulation of histone H3-K4 methylation	2/358	11/3915	0.266182	0.967231	0.967231	XP_031075968.1/XP_031080635.1	2
BP	GO:0051952	regulation of amine transport	2/358	11/3915	0.266182	0.967231	0.967231	XP_031080123.1/XP_031085409.1	2
BP	GO:0051955	regulation of amino acid transport	2/358	11/3915	0.266182	0.967231	0.967231	XP_031080123.1/XP_031085409.1	2
BP	GO:0055069	zinc ion homeostasis	2/358	11/3915	0.266182	0.967231	0.967231	XP_031077076.1/XP_031079915.1	2
BP	GO:0061804	mitotic spindle formation (spindle phase one)	2/358	11/3915	0.266182	0.967231	0.967231	XP_031074871.1/XP_031087601.1	2
BP	GO:0071616	acyl-CoA biosynthetic process	2/358	11/3915	0.266182	0.967231	0.967231	XP_031079474.1/XP_031089689.1	2
BP	GO:0071709	membrane assembly	2/358	11/3915	0.266182	0.967231	0.967231	XP_031077288.1/XP_031080315.1	2
BP	GO:0040029	epigenetic regulation of gene expression	16/358	147/3915	0.266419	0.967231	0.967231	XP_031076197.1/XP_031075968.1/XP_031075779.1/XP_031077200.1/XP_031080635.1/XP_031080695.1/XP_031079022.1/XP_031084047.1/XP_031083571.1/XP_031087533.1/XP_031087597.1/XP_031082799.1/XP_031082893.1/XP_031081529.1/XP_031081872.1/XP_031086974.1	16
MF	GO:0018455	alcohol dehydrogenase [NAD(P)+] activity	2/310	11/3385	0.266758	0.932611	0.932611	XP_031080879.1/XP_031086811.1	2
MF	GO:0019239	deaminase activity	2/310	11/3385	0.266758	0.932611	0.932611	XP_031075911.1/XP_031077385.1	2
MF	GO:0030246	carbohydrate binding	2/310	11/3385	0.266758	0.932611	0.932611	XP_031075883.1/XP_031078995.1	2
MF	GO:0050661	NADP binding	2/310	11/3385	0.266758	0.932611	0.932611	XP_031075629.1/XP_031080872.1	2
CC	GO:0051286	cell tip	17/343	158/3769	0.266984	0.93465	0.93465	XP_031075768.1/XP_031075193.1/XP_031075082.1/XP_031074765.1/XP_031077613.1/XP_031077596.1/XP_031079951.1/XP_031080315.1/XP_031080695.1/XP_031079044.1/XP_031083630.1/XP_031082939.1/XP_031083015.1/XP_031081814.1/XP_031081869.1/XP_031081928.1/XP_031081977.1	17
CC	GO:0060187	cell pole	17/343	158/3769	0.266984	0.93465	0.93465	XP_031075768.1/XP_031075193.1/XP_031075082.1/XP_031074765.1/XP_031077613.1/XP_031077596.1/XP_031079951.1/XP_031080315.1/XP_031080695.1/XP_031079044.1/XP_031083630.1/XP_031082939.1/XP_031083015.1/XP_031081814.1/XP_031081869.1/XP_031081928.1/XP_031081977.1	17
BP	GO:0031669	cellular response to nutrient levels	20/358	188/3915	0.267918	0.967231	0.967231	XP_031075779.1/XP_031075534.1/XP_031075386.1/XP_031075320.1/XP_031077988.1/XP_031077765.1/XP_031077505.1/XP_031077249.1/XP_031077076.1/XP_031076726.1/XP_031079334.1/XP_031078792.1/XP_031083555.1/XP_031083543.1/XP_031087597.1/XP_031082731.1/XP_031082916.1/XP_031081869.1/XP_031088871.1/XP_031088960.1	20
BP	GO:0045935	positive regulation of nucleobase-containing compound metabolic process	33/358	323/3915	0.27028	0.967231	0.967231	XP_031075808.1/XP_031075534.1/XP_031075445.1/XP_031075320.1/XP_031074816.1/XP_031074813.1/XP_031074691.1/XP_031077988.1/XP_031077854.1/XP_031077810.1/XP_031077753.1/XP_031077424.1/XP_031077291.1/XP_031077249.1/XP_031077200.1/XP_031076955.1/XP_031076726.1/XP_031080570.1/XP_031080635.1/XP_031079462.1/XP_031079233.1/XP_031079022.1/XP_031084058.1/XP_031083555.1/XP_031089703.1/XP_031082412.1/XP_031082…	33
BP	GO:0007275	multicellular organism development	4/358	29/3915	0.27101	0.967231	0.967231	XP_031077816.1/XP_031077286.1/XP_031080222.1/XP_031083699.1	4
BP	GO:0051225	spindle assembly	4/358	29/3915	0.27101	0.967231	0.967231	XP_031075390.1/XP_031074871.1/XP_031087601.1/XP_031083242.1	4
BP	GO:0070816	phosphorylation of RNA polymerase II C-terminal domain	4/358	29/3915	0.27101	0.967231	0.967231	XP_031077753.1/XP_031080635.1/XP_031081471.1/XP_031089003.1	4
BP	GO:0090307	mitotic spindle assembly	4/358	29/3915	0.27101	0.967231	0.967231	XP_031075390.1/XP_031074871.1/XP_031087601.1/XP_031083242.1	4
BP	GO:0006360	transcription by RNA polymerase I	6/358	48/3915	0.272322	0.967231	0.967231	XP_031075320.1/XP_031074691.1/XP_031077753.1/XP_031080635.1/XP_031082859.1/XP_031081705.1	6
BP	GO:0009308	amine metabolic process	6/358	48/3915	0.272322	0.967231	0.967231	XP_031076272.1/XP_031075541.1/XP_031079062.1/XP_031078681.1/XP_031082916.1/XP_031081891.1	6
BP	GO:0019216	regulation of lipid metabolic process	6/358	48/3915	0.272322	0.967231	0.967231	XP_031075320.1/XP_031079008.1/XP_031084047.1/XP_031083915.1/XP_031083630.1/XP_031081977.1	6
BP	GO:0009991	response to extracellular stimulus	24/358	230/3915	0.274055	0.967231	0.967231	XP_031075779.1/XP_031075541.1/XP_031075534.1/XP_031075386.1/XP_031075320.1/XP_031077988.1/XP_031077765.1/XP_031077505.1/XP_031077249.1/XP_031077076.1/XP_031076726.1/XP_031080117.1/XP_031080828.1/XP_031079334.1/XP_031078792.1/XP_031083555.1/XP_031083543.1/XP_031087597.1/XP_031082731.1/XP_031082916.1/XP_031081700.1/XP_031081869.1/XP_031088871.1/XP_031088960.1	24
BP	GO:0006084	acetyl-CoA metabolic process	3/358	20/3915	0.274446	0.967231	0.967231	XP_031077586.1/XP_031079474.1/XP_031089689.1	3
BP	GO:0006165	nucleoside diphosphate phosphorylation	3/358	20/3915	0.274446	0.967231	0.967231	XP_031075629.1/XP_031077138.1/XP_031079702.1	3
BP	GO:0006525	arginine metabolic process	3/358	20/3915	0.274446	0.967231	0.967231	XP_031077235.1/XP_031082916.1/XP_031081710.1	3
BP	GO:0007030	Golgi organization	3/358	20/3915	0.274446	0.967231	0.967231	XP_031075356.1/XP_031080315.1/XP_031084018.1	3
BP	GO:0030473	nuclear migration along microtubule	3/358	20/3915	0.274446	0.967231	0.967231	XP_031074938.1/XP_031080861.1/XP_031087601.1	3
BP	GO:0031138	negative regulation of conjugation with cellular fusion	3/358	20/3915	0.274446	0.967231	0.967231	XP_031075320.1/XP_031074765.1/XP_031082916.1	3
BP	GO:0031573	mitotic intra-S DNA damage checkpoint signaling	3/358	20/3915	0.274446	0.967231	0.967231	XP_031076249.1/XP_031083571.1/XP_031088119.1	3
BP	GO:0034308	primary alcohol metabolic process	3/358	20/3915	0.274446	0.967231	0.967231	XP_031080665.1/XP_031079062.1/XP_031086811.1	3
BP	GO:0042455	ribonucleoside biosynthetic process	3/358	20/3915	0.274446	0.967231	0.967231	XP_031077656.1/XP_031082436.1/XP_031083026.1	3
BP	GO:0045926	negative regulation of growth	3/358	20/3915	0.274446	0.967231	0.967231	XP_031075320.1/XP_031083543.1/XP_031087533.1	3
BP	GO:0046470	phosphatidylcholine metabolic process	3/358	20/3915	0.274446	0.967231	0.967231	XP_031079008.1/XP_031082994.1/XP_031081977.1	3
BP	GO:0046939	nucleotide phosphorylation	3/358	20/3915	0.274446	0.967231	0.967231	XP_031075629.1/XP_031077138.1/XP_031079702.1	3
BP	GO:0048311	mitochondrion distribution	3/358	20/3915	0.274446	0.967231	0.967231	XP_031074938.1/XP_031080861.1/XP_031088783.1	3
BP	GO:0060631	regulation of meiosis I	3/358	20/3915	0.274446	0.967231	0.967231	XP_031083817.1/XP_031087641.1/XP_031088031.1	3
BP	GO:0070591	ascospore wall biogenesis	3/358	20/3915	0.274446	0.967231	0.967231	XP_031077613.1/XP_031083732.1/XP_031088783.1	3
BP	GO:0097035	regulation of membrane lipid distribution	3/358	20/3915	0.274446	0.967231	0.967231	XP_031080598.1/XP_031087712.1/XP_031081928.1	3
MF	GO:0008374	O-acyltransferase activity	3/310	20/3385	0.275188	0.932611	0.932611	XP_031074392.1/XP_031078929.1/XP_031086769.1	3
CC	GO:0030312	external encapsulating structure	11/343	98/3769	0.276209	0.93465	0.93465	XP_031075883.1/XP_031078096.1/XP_031080296.1/XP_031079702.1/XP_031079294.1/XP_031078792.1/XP_031083732.1/XP_031083572.1/XP_031082568.1/XP_031081241.1/XP_031086811.1	11
CC	GO:0000793	condensed chromosome	10/343	88/3769	0.276659	0.93465	0.93465	XP_031075390.1/XP_031074871.1/XP_031077603.1/XP_031080052.1/XP_031080695.1/XP_031080899.1/XP_031082989.1/XP_031081739.1/XP_031081999.1/XP_031088119.1	10
BP	GO:0034637	cellular carbohydrate biosynthetic process	7/358	58/3915	0.277107	0.967231	0.967231	XP_031075652.1/XP_031080514.1/XP_031078995.1/XP_031083732.1/XP_031083572.1/XP_031081814.1/XP_031088982.1	7
CC	GO:0005811	lipid droplet	5/343	39/3769	0.278972	0.93465	0.93465	XP_031077765.1/XP_031079008.1/XP_031078906.1/XP_031081674.1/XP_031086769.1	5
CC	GO:0071013	catalytic step 2 spliceosome	5/343	39/3769	0.278972	0.93465	0.93465	XP_031075829.1/XP_031075383.1/XP_031074579.1/XP_031079389.1/XP_031087959.1	5
BP	GO:0019318	hexose metabolic process	8/358	68/3915	0.279849	0.967231	0.967231	XP_031077138.1/XP_031080120.1/XP_031079702.1/XP_031079062.1/XP_031083678.1/XP_031083555.1/XP_031081548.1/XP_031086811.1	8
BP	GO:0062012	regulation of small molecule metabolic process	8/358	68/3915	0.279849	0.967231	0.967231	XP_031076272.1/XP_031075541.1/XP_031077249.1/XP_031080120.1/XP_031079008.1/XP_031083555.1/XP_031082916.1/XP_031081891.1	8
BP	GO:0072524	pyridine-containing compound metabolic process	8/358	68/3915	0.279849	0.967231	0.967231	XP_031075629.1/XP_031077138.1/XP_031079702.1/XP_031079062.1/XP_031082436.1/XP_031082860.1/XP_031086811.1/XP_031085254.1	8
BP	GO:0006811	ion transport	34/358	335/3915	0.279862	0.967231	0.967231	XP_031075974.1/XP_031075517.1/XP_031075386.1/XP_031075212.1/XP_031077635.1/XP_031077505.1/XP_031077362.1/XP_031077325.1/XP_031077249.1/XP_031079915.1/XP_031080123.1/XP_031080598.1/XP_031080605.1/XP_031080824.1/XP_031080915.1/XP_031080975.1/XP_031079696.1/XP_031079489.1/XP_031079319.1/XP_031079299.1/XP_031079008.1/XP_031078721.1/XP_031084069.1/XP_031083984.1/XP_031087564.1/XP_031087632.1/XP_031082…	34
BP	GO:0010035	response to inorganic substance	9/358	78/3915	0.281253	0.967231	0.967231	XP_031076272.1/XP_031077249.1/XP_031079915.1/XP_031080895.1/XP_031079334.1/XP_031078792.1/XP_031083342.1/XP_031086937.1/XP_031088960.1	9
BP	GO:0046390	ribose phosphate biosynthetic process	9/358	78/3915	0.281253	0.967231	0.967231	XP_031075629.1/XP_031077889.1/XP_031077656.1/XP_031077138.1/XP_031079702.1/XP_031079474.1/XP_031089689.1/XP_031083026.1/XP_031081674.1	9
BP	GO:1905039	carboxylic acid transmembrane transport	10/358	88/3915	0.281738	0.967231	0.967231	XP_031080123.1/XP_031080824.1/XP_031080915.1/XP_031079319.1/XP_031084069.1/XP_031083984.1/XP_031087632.1/XP_031082027.1/XP_031086608.1/XP_031085409.1	10
MF	GO:0008270	zinc ion binding	12/310	108/3385	0.28235	0.932611	0.932611	XP_031076094.1/XP_031075846.1/XP_031075534.1/XP_031074933.1/XP_031077385.1/XP_031076726.1/XP_031080135.1/XP_031080190.1/XP_031083555.1/XP_031082685.1/XP_031083060.1/XP_031086970.1	12
BP	GO:0040020	regulation of meiotic nuclear division	5/358	39/3915	0.282382	0.967231	0.967231	XP_031076045.1/XP_031074765.1/XP_031083817.1/XP_031087641.1/XP_031088031.1	5
BP	GO:0044093	positive regulation of molecular function	20/358	190/3915	0.284146	0.967231	0.967231	XP_031075193.1/XP_031075082.1/XP_031074765.1/XP_031077574.1/XP_031077563.1/XP_031077216.1/XP_031077200.1/XP_031076958.1/XP_031080123.1/XP_031079517.1/XP_031079022.1/XP_031083915.1/XP_031083543.1/XP_031087419.1/XP_031081471.1/XP_031081872.1/XP_031082013.1/XP_031086970.1/XP_031087981.1/XP_031088119.1	20
CC	GO:0030428	cell septum	6/343	49/3769	0.284759	0.93465	0.93465	XP_031075390.1/XP_031075193.1/XP_031074765.1/XP_031079951.1/XP_031080695.1/XP_031081814.1	6
BP	GO:0006006	glucose metabolic process	6/358	49/3915	0.288602	0.967231	0.967231	XP_031077138.1/XP_031080120.1/XP_031079702.1/XP_031079062.1/XP_031083555.1/XP_031086811.1	6
BP	GO:0006665	sphingolipid metabolic process	6/358	49/3915	0.288602	0.967231	0.967231	XP_031075320.1/XP_031080038.1/XP_031079482.1/XP_031081729.1/XP_031088871.1/XP_031088325.1	6
CC	GO:0044232	organelle membrane contact site	4/343	30/3769	0.289134	0.93465	0.93465	XP_031075212.1/XP_031080605.1/XP_031084047.1/XP_031087564.1	4
BP	GO:0008380	RNA splicing	17/358	160/3915	0.291601	0.967231	0.967231	XP_031075829.1/XP_031075769.1/XP_031075383.1/XP_031074813.1/XP_031074579.1/XP_031077430.1/XP_031076958.1/XP_031080202.1/XP_031079389.1/XP_031087352.1/XP_031089703.1/XP_031082451.1/XP_031082685.1/XP_031082739.1/XP_031087072.1/XP_031087959.1/XP_031088315.1	17
BP	GO:0006470	protein dephosphorylation	7/358	59/3915	0.291966	0.967231	0.967231	XP_031075779.1/XP_031075390.1/XP_031075086.1/XP_031079991.1/XP_031080695.1/XP_031080734.1/XP_031087981.1	7
BP	GO:0015748	organophosphate ester transport	7/358	59/3915	0.291966	0.967231	0.967231	XP_031080598.1/XP_031080605.1/XP_031079489.1/XP_031079008.1/XP_031087564.1/XP_031082574.1/XP_031081977.1	7
BP	GO:0046496	nicotinamide nucleotide metabolic process	7/358	59/3915	0.291966	0.967231	0.967231	XP_031075629.1/XP_031077138.1/XP_031079702.1/XP_031079062.1/XP_031082860.1/XP_031086811.1/XP_031085254.1	7
BP	GO:0010501	RNA secondary structure unwinding	4/358	30/3915	0.292185	0.967231	0.967231	XP_031075017.1/XP_031080834.1/XP_031087711.1/XP_031081550.1	4
BP	GO:0015804	neutral amino acid transport	4/358	30/3915	0.292185	0.967231	0.967231	XP_031080123.1/XP_031079319.1/XP_031087632.1/XP_031085409.1	4
BP	GO:0046822	regulation of nucleocytoplasmic transport	4/358	30/3915	0.292185	0.967231	0.967231	XP_031076272.1/XP_031083543.1/XP_031089703.1/XP_031083242.1	4
BP	GO:0062013	positive regulation of small molecule metabolic process	4/358	30/3915	0.292185	0.967231	0.967231	XP_031076272.1/XP_031075541.1/XP_031083555.1/XP_031081891.1	4
MF	GO:0003688	DNA replication origin binding	4/310	30/3385	0.293091	0.932611	0.932611	XP_031075829.1/XP_031077200.1/XP_031087542.1/XP_031086974.1	4
MF	GO:0015267	channel activity	4/310	30/3385	0.293091	0.932611	0.932611	XP_031077635.1/XP_031077362.1/XP_031077325.1/XP_031082027.1	4
MF	GO:0022803	passive transmembrane transporter activity	4/310	30/3385	0.293091	0.932611	0.932611	XP_031077635.1/XP_031077362.1/XP_031077325.1/XP_031082027.1	4
MF	GO:0030515	snoRNA binding	4/310	30/3385	0.293091	0.932611	0.932611	XP_031076000.1/XP_031074691.1/XP_031077730.1/XP_031081702.1	4
BP	GO:0010648	negative regulation of cell communication	8/358	69/3915	0.293592	0.967231	0.967231	XP_031075445.1/XP_031075320.1/XP_031075193.1/XP_031077249.1/XP_031080123.1/XP_031080695.1/XP_031080828.1/XP_031083543.1	8
BP	GO:0048585	negative regulation of response to stimulus	10/358	89/3915	0.293813	0.967231	0.967231	XP_031075445.1/XP_031075320.1/XP_031075193.1/XP_031077249.1/XP_031080123.1/XP_031080695.1/XP_031080828.1/XP_031083543.1/XP_031087641.1/XP_031088119.1	10
BP	GO:0046165	alcohol biosynthetic process	9/358	79/3915	0.294087	0.967231	0.967231	XP_031077765.1/XP_031077586.1/XP_031080665.1/XP_031080872.1/XP_031079062.1/XP_031083572.1/XP_031086574.1/XP_031086811.1/XP_031088960.1	9
BP	GO:0034220	ion transmembrane transport	27/358	264/3915	0.294456	0.967231	0.967231	XP_031075974.1/XP_031075517.1/XP_031075386.1/XP_031075212.1/XP_031077635.1/XP_031077505.1/XP_031077362.1/XP_031077325.1/XP_031079915.1/XP_031080123.1/XP_031080824.1/XP_031080915.1/XP_031080975.1/XP_031079696.1/XP_031079489.1/XP_031079319.1/XP_031079299.1/XP_031078721.1/XP_031084069.1/XP_031083984.1/XP_031087632.1/XP_031082574.1/XP_031082027.1/XP_031086608.1/XP_031088002.1/XP_031084712.1/XP_031085…	27
BP	GO:0044772	mitotic cell cycle phase transition	22/358	212/3915	0.294752	0.967231	0.967231	XP_031076045.1/XP_031075390.1/XP_031075320.1/XP_031074765.1/XP_031077760.1/XP_031080123.1/XP_031080452.1/XP_031080635.1/XP_031080695.1/XP_031080895.1/XP_031079334.1/XP_031084058.1/XP_031083571.1/XP_031087419.1/XP_031087601.1/XP_031083242.1/XP_031081814.1/XP_031081824.1/XP_031081869.1/XP_031082013.1/XP_031088031.1/XP_031088119.1	22
MF	GO:0008514	organic anion transmembrane transporter activity	10/310	89/3385	0.295201	0.932611	0.932611	XP_031080824.1/XP_031080915.1/XP_031079489.1/XP_031079319.1/XP_031084069.1/XP_031083984.1/XP_031087632.1/XP_031082574.1/XP_031082027.1/XP_031086608.1	10
BP	GO:0044255	cellular lipid metabolic process	31/358	306/3915	0.2955	0.967231	0.967231	XP_031076323.1/XP_031076028.1/XP_031075967.1/XP_031075768.1/XP_031075320.1/XP_031074564.1/XP_031077765.1/XP_031077731.1/XP_031077586.1/XP_031077325.1/XP_031080038.1/XP_031080857.1/XP_031080872.1/XP_031079482.1/XP_031079474.1/XP_031079008.1/XP_031078906.1/XP_031084047.1/XP_031083915.1/XP_031083630.1/XP_031087533.1/XP_031082994.1/XP_031081729.1/XP_031081977.1/XP_031086769.1/XP_031086989.1/XP_031088…	31
CC	GO:0005774	vacuolar membrane	19/343	182/3769	0.296135	0.93465	0.93465	XP_031075982.1/XP_031075932.1/XP_031075320.1/XP_031075212.1/XP_031077835.1/XP_031077635.1/XP_031079696.1/XP_031079364.1/XP_031079319.1/XP_031083984.1/XP_031083915.1/XP_031087591.1/XP_031087632.1/XP_031082568.1/XP_031081814.1/XP_031086937.1/XP_031087110.1/XP_031089001.1/XP_031087961.1	19
BP	GO:0000398	mRNA splicing, via spliceosome	15/358	140/3915	0.296369	0.967231	0.967231	XP_031075829.1/XP_031075769.1/XP_031075383.1/XP_031074579.1/XP_031077430.1/XP_031076958.1/XP_031080202.1/XP_031079389.1/XP_031089703.1/XP_031082451.1/XP_031082685.1/XP_031082739.1/XP_031087072.1/XP_031087959.1/XP_031088315.1	15
CC	GO:0042995	cell projection	12/343	110/3769	0.296929	0.93465	0.93465	XP_031075768.1/XP_031075193.1/XP_031075082.1/XP_031077613.1/XP_031080315.1/XP_031080695.1/XP_031083630.1/XP_031082939.1/XP_031083015.1/XP_031081814.1/XP_031081869.1/XP_031081928.1	12
CC	GO:0120025	plasma membrane bounded cell projection	12/343	110/3769	0.296929	0.93465	0.93465	XP_031075768.1/XP_031075193.1/XP_031075082.1/XP_031077613.1/XP_031080315.1/XP_031080695.1/XP_031083630.1/XP_031082939.1/XP_031083015.1/XP_031081814.1/XP_031081869.1/XP_031081928.1	12
BP	GO:0065003	protein-containing complex assembly	47/358	475/3915	0.296992	0.967231	0.967231	XP_031076197.1/XP_031075974.1/XP_031075968.1/XP_031075829.1/XP_031075769.1/XP_031075508.1/XP_031075356.1/XP_031074938.1/XP_031074579.1/XP_031077900.1/XP_031077760.1/XP_031077753.1/XP_031077730.1/XP_031077574.1/XP_031077225.1/XP_031077138.1/XP_031080202.1/XP_031080493.1/XP_031080570.1/XP_031080598.1/XP_031080834.1/XP_031080899.1/XP_031079389.1/XP_031079223.1/XP_031079174.1/XP_031084018.1/XP_031083…	47
CC	GO:0030445	yeast-form cell wall	3/343	21/3769	0.297751	0.93465	0.93465	XP_031078096.1/XP_031083732.1/XP_031082568.1	3
CC	GO:0031261	DNA replication preinitiation complex	3/343	21/3769	0.297751	0.93465	0.93465	XP_031087419.1/XP_031087542.1/XP_031086974.1	3
CC	GO:0070461	SAGA-type complex	3/343	21/3769	0.297751	0.93465	0.93465	XP_031074816.1/XP_031081872.1/XP_031086838.1	3
CC	GO:0000243	commitment complex	2/343	12/3769	0.299459	0.93465	0.93465	XP_031075769.1/XP_031080202.1	2
CC	GO:0005669	transcription factor TFIID complex	2/343	12/3769	0.299459	0.93465	0.93465	XP_031082859.1/XP_031086838.1	2
CC	GO:0030119	AP-type membrane coat adaptor complex	2/343	12/3769	0.299459	0.93465	0.93465	XP_031077596.1/XP_031079142.1	2
CC	GO:0072687	meiotic spindle	2/343	12/3769	0.299459	0.93465	0.93465	XP_031074871.1/XP_031080315.1	2
MF	GO:0015318	inorganic molecular entity transmembrane transporter activity	21/310	202/3385	0.299567	0.932611	0.932611	XP_031075974.1/XP_031075517.1/XP_031075212.1/XP_031077635.1/XP_031077505.1/XP_031077362.1/XP_031077325.1/XP_031079915.1/XP_031080824.1/XP_031080915.1/XP_031080975.1/XP_031079696.1/XP_031079319.1/XP_031078721.1/XP_031084069.1/XP_031083984.1/XP_031087632.1/XP_031082574.1/XP_031082027.1/XP_031086608.1/XP_031088002.1	21
BP	GO:0006903	vesicle targeting	3/358	21/3915	0.30036	0.967231	0.967231	XP_031080315.1/XP_031087591.1/XP_031086970.1	3
BP	GO:0009163	nucleoside biosynthetic process	3/358	21/3915	0.30036	0.967231	0.967231	XP_031077656.1/XP_031082436.1/XP_031083026.1	3
BP	GO:0031338	regulation of vesicle fusion	3/358	21/3915	0.30036	0.967231	0.967231	XP_031079517.1/XP_031084018.1/XP_031087591.1	3
BP	GO:0034755	iron ion transmembrane transport	3/358	21/3915	0.30036	0.967231	0.967231	XP_031075386.1/XP_031079696.1/XP_031079299.1	3
BP	GO:0042133	neurotransmitter metabolic process	3/358	21/3915	0.30036	0.967231	0.967231	XP_031074995.1/XP_031080117.1/XP_031081700.1	3
BP	GO:0051274	beta-glucan biosynthetic process	3/358	21/3915	0.30036	0.967231	0.967231	XP_031078995.1/XP_031083732.1/XP_031081814.1	3
BP	GO:0051300	spindle pole body organization	3/358	21/3915	0.30036	0.967231	0.967231	XP_031074871.1/XP_031080861.1/XP_031087601.1	3
BP	GO:0051788	response to misfolded protein	3/358	21/3915	0.30036	0.967231	0.967231	XP_031078995.1/XP_031082513.1/XP_031088318.1	3
BP	GO:0071071	regulation of phospholipid biosynthetic process	3/358	21/3915	0.30036	0.967231	0.967231	XP_031079008.1/XP_031083915.1/XP_031081977.1	3
BP	GO:0071218	cellular response to misfolded protein	3/358	21/3915	0.30036	0.967231	0.967231	XP_031078995.1/XP_031082513.1/XP_031088318.1	3
BP	GO:0031668	cellular response to extracellular stimulus	20/358	192/3915	0.300711	0.967231	0.967231	XP_031075779.1/XP_031075534.1/XP_031075386.1/XP_031075320.1/XP_031077988.1/XP_031077765.1/XP_031077505.1/XP_031077249.1/XP_031077076.1/XP_031076726.1/XP_031079334.1/XP_031078792.1/XP_031083555.1/XP_031083543.1/XP_031087597.1/XP_031082731.1/XP_031082916.1/XP_031081869.1/XP_031088871.1/XP_031088960.1	20
BP	GO:0071496	cellular response to external stimulus	20/358	192/3915	0.300711	0.967231	0.967231	XP_031075779.1/XP_031075534.1/XP_031075386.1/XP_031075320.1/XP_031077988.1/XP_031077765.1/XP_031077505.1/XP_031077249.1/XP_031077076.1/XP_031076726.1/XP_031079334.1/XP_031078792.1/XP_031083555.1/XP_031083543.1/XP_031087597.1/XP_031082731.1/XP_031082916.1/XP_031081869.1/XP_031088871.1/XP_031088960.1	20
BP	GO:0016571	histone methylation	5/358	40/3915	0.300789	0.967231	0.967231	XP_031075968.1/XP_031077753.1/XP_031080635.1/XP_031081529.1/XP_031086923.1	5
BP	GO:0030148	sphingolipid biosynthetic process	5/358	40/3915	0.300789	0.967231	0.967231	XP_031075320.1/XP_031080038.1/XP_031079482.1/XP_031081729.1/XP_031088325.1	5
CC	GO:0005628	prospore membrane	6/343	50/3769	0.301115	0.93465	0.93465	XP_031075660.1/XP_031077288.1/XP_031080315.1/XP_031079008.1/XP_031083732.1/XP_031081977.1	6
MF	GO:0008238	exopeptidase activity	3/310	21/3385	0.301157	0.932611	0.932611	XP_031080803.1/XP_031079352.1/XP_031088333.1	3
MF	GO:0015932	nucleobase-containing compound transmembrane transporter activity	3/310	21/3385	0.301157	0.932611	0.932611	XP_031079489.1/XP_031087453.1/XP_031082574.1	3
MF	GO:1901682	sulfur compound transmembrane transporter activity	3/310	21/3385	0.301157	0.932611	0.932611	XP_031075517.1/XP_031077505.1/XP_031082574.1	3
BP	GO:0006007	glucose catabolic process	2/358	12/3915	0.301486	0.967231	0.967231	XP_031077138.1/XP_031079702.1	2
BP	GO:0006098	pentose-phosphate shunt	2/358	12/3915	0.301486	0.967231	0.967231	XP_031075629.1/XP_031079702.1	2
BP	GO:0006113	fermentation	2/358	12/3915	0.301486	0.967231	0.967231	XP_031079062.1/XP_031086811.1	2
BP	GO:0006537	glutamate biosynthetic process	2/358	12/3915	0.301486	0.967231	0.967231	XP_031078049.1/XP_031080117.1	2
BP	GO:0006735	NADH regeneration	2/358	12/3915	0.301486	0.967231	0.967231	XP_031077138.1/XP_031079702.1	2
BP	GO:0007095	mitotic G2 DNA damage checkpoint signaling	2/358	12/3915	0.301486	0.967231	0.967231	XP_031076045.1/XP_031087419.1	2
BP	GO:0015824	proline transport	2/358	12/3915	0.301486	0.967231	0.967231	XP_031079319.1/XP_031087632.1	2
BP	GO:0015837	amine transport	2/358	12/3915	0.301486	0.967231	0.967231	XP_031080123.1/XP_031085409.1	2
BP	GO:0018023	peptidyl-lysine trimethylation	2/358	12/3915	0.301486	0.967231	0.967231	XP_031077753.1/XP_031080635.1	2
BP	GO:0019682	glyceraldehyde-3-phosphate metabolic process	2/358	12/3915	0.301486	0.967231	0.967231	XP_031075629.1/XP_031079702.1	2
BP	GO:0043386	mycotoxin biosynthetic process	2/358	12/3915	0.301486	0.967231	0.967231	XP_031074564.1/XP_031083699.1	2
BP	GO:0046686	response to cadmium ion	2/358	12/3915	0.301486	0.967231	0.967231	XP_031080895.1/XP_031083342.1	2
BP	GO:0046854	phosphatidylinositol phosphate biosynthetic process	2/358	12/3915	0.301486	0.967231	0.967231	XP_031075768.1/XP_031087961.1	2
BP	GO:0061615	glycolytic process through fructose-6-phosphate	2/358	12/3915	0.301486	0.967231	0.967231	XP_031077138.1/XP_031079702.1	2
BP	GO:0061620	glycolytic process through glucose-6-phosphate	2/358	12/3915	0.301486	0.967231	0.967231	XP_031077138.1/XP_031079702.1	2
BP	GO:0061621	canonical glycolysis	2/358	12/3915	0.301486	0.967231	0.967231	XP_031077138.1/XP_031079702.1	2
BP	GO:0061718	glucose catabolic process to pyruvate	2/358	12/3915	0.301486	0.967231	0.967231	XP_031077138.1/XP_031079702.1	2
BP	GO:0070879	fungal-type cell wall beta-glucan metabolic process	2/358	12/3915	0.301486	0.967231	0.967231	XP_031078995.1/XP_031083732.1	2
BP	GO:0070880	fungal-type cell wall beta-glucan biosynthetic process	2/358	12/3915	0.301486	0.967231	0.967231	XP_031078995.1/XP_031083732.1	2
BP	GO:0072488	ammonium transmembrane transport	2/358	12/3915	0.301486	0.967231	0.967231	XP_031077325.1/XP_031082027.1	2
BP	GO:1901679	nucleotide transmembrane transport	2/358	12/3915	0.301486	0.967231	0.967231	XP_031079489.1/XP_031082574.1	2
BP	GO:2000026	regulation of multicellular organismal development	2/358	12/3915	0.301486	0.967231	0.967231	XP_031077816.1/XP_031080222.1	2
MF	GO:0015171	amino acid transmembrane transporter activity	5/310	40/3385	0.301826	0.932611	0.932611	XP_031079319.1/XP_031084069.1/XP_031087632.1/XP_031082027.1/XP_031086608.1	5
MF	GO:0015631	tubulin binding	5/310	40/3385	0.301826	0.932611	0.932611	XP_031074871.1/XP_031077574.1/XP_031080052.1/XP_031080899.1/XP_031087601.1	5
BP	GO:0006974	cellular response to DNA damage stimulus	29/358	286/3915	0.302029	0.967231	0.967231	XP_031076249.1/XP_031076045.1/XP_031075445.1/XP_031075390.1/XP_031075200.1/XP_031077760.1/XP_031077753.1/XP_031077613.1/XP_031077603.1/XP_031077200.1/XP_031077189.1/XP_031080635.1/XP_031080695.1/XP_031079334.1/XP_031079022.1/XP_031083817.1/XP_031083571.1/XP_031087411.1/XP_031087419.1/XP_031087533.1/XP_031087542.1/XP_031087641.1/XP_031089719.1/XP_031082412.1/XP_031082989.1/XP_031086938.1/XP_031086…	29
MF	GO:0008519	ammonium transmembrane transporter activity	2/310	12/3385	0.302123	0.932611	0.932611	XP_031077325.1/XP_031082027.1	2
MF	GO:0015101	organic cation transmembrane transporter activity	2/310	12/3385	0.302123	0.932611	0.932611	XP_031077325.1/XP_031082027.1	2
MF	GO:0015215	nucleotide transmembrane transporter activity	2/310	12/3385	0.302123	0.932611	0.932611	XP_031079489.1/XP_031082574.1	2
CC	GO:0000322	storage vacuole	30/343	298/3769	0.302403	0.93465	0.93465	XP_031075982.1/XP_031075932.1/XP_031075517.1/XP_031075320.1/XP_031075212.1/XP_031075086.1/XP_031077871.1/XP_031077835.1/XP_031077635.1/XP_031077362.1/XP_031079915.1/XP_031080007.1/XP_031080803.1/XP_031079696.1/XP_031079364.1/XP_031079319.1/XP_031083984.1/XP_031083915.1/XP_031083630.1/XP_031087591.1/XP_031087632.1/XP_031082568.1/XP_031081814.1/XP_031081928.1/XP_031087110.1/XP_031089001.1/XP_031087…	30
CC	GO:0000324	fungal-type vacuole	30/343	298/3769	0.302403	0.93465	0.93465	XP_031075982.1/XP_031075932.1/XP_031075517.1/XP_031075320.1/XP_031075212.1/XP_031075086.1/XP_031077871.1/XP_031077835.1/XP_031077635.1/XP_031077362.1/XP_031079915.1/XP_031080007.1/XP_031080803.1/XP_031079696.1/XP_031079364.1/XP_031079319.1/XP_031083984.1/XP_031083915.1/XP_031083630.1/XP_031087591.1/XP_031087632.1/XP_031082568.1/XP_031081814.1/XP_031081928.1/XP_031087110.1/XP_031089001.1/XP_031087…	30
BP	GO:0051254	positive regulation of RNA metabolic process	30/358	297/3915	0.305539	0.967231	0.967231	XP_031075808.1/XP_031075534.1/XP_031075445.1/XP_031075320.1/XP_031074816.1/XP_031074813.1/XP_031074691.1/XP_031077988.1/XP_031077854.1/XP_031077810.1/XP_031077753.1/XP_031077424.1/XP_031077291.1/XP_031077249.1/XP_031077200.1/XP_031076955.1/XP_031076726.1/XP_031080635.1/XP_031079462.1/XP_031079233.1/XP_031084058.1/XP_031083555.1/XP_031089703.1/XP_031082412.1/XP_031082799.1/XP_031082893.1/XP_031082…	30
BP	GO:0031401	positive regulation of protein modification process	10/358	90/3915	0.306024	0.967231	0.967231	XP_031075968.1/XP_031075082.1/XP_031077753.1/XP_031077200.1/XP_031080635.1/XP_031080695.1/XP_031087419.1/XP_031081471.1/XP_031082013.1/XP_031088119.1	10
BP	GO:0007034	vacuolar transport	15/358	141/3915	0.306124	0.967231	0.967231	XP_031075982.1/XP_031075417.1/XP_031075356.1/XP_031080038.1/XP_031080871.1/XP_031079319.1/XP_031079142.1/XP_031079045.1/XP_031087591.1/XP_031087632.1/XP_031081977.1/XP_031087019.1/XP_031087110.1/XP_031088783.1/XP_031089001.1	15
MF	GO:0030695	GTPase regulator activity	10/310	90/3385	0.307467	0.932611	0.932611	XP_031075417.1/XP_031075193.1/XP_031075082.1/XP_031077816.1/XP_031077574.1/XP_031080123.1/XP_031079517.1/XP_031083242.1/XP_031081869.1/XP_031086970.1	10
MF	GO:0051082	unfolded protein binding	7/310	60/3385	0.308238	0.932611	0.932611	XP_031077724.1/XP_031077602.1/XP_031077574.1/XP_031077563.1/XP_031077225.1/XP_031079154.1/XP_031078995.1	7
BP	GO:0030154	cell differentiation	20/358	193/3915	0.309108	0.967231	0.967231	XP_031076272.1/XP_031076249.1/XP_031075968.1/XP_031075320.1/XP_031077816.1/XP_031077613.1/XP_031077288.1/XP_031077249.1/XP_031080222.1/XP_031080315.1/XP_031080695.1/XP_031083817.1/XP_031083732.1/XP_031083699.1/XP_031087419.1/XP_031082916.1/XP_031082978.1/XP_031081891.1/XP_031081977.1/XP_031088783.1	20
BP	GO:0022413	reproductive process in single-celled organism	13/358	121/3915	0.311387	0.967231	0.967231	XP_031076249.1/XP_031075968.1/XP_031077613.1/XP_031077288.1/XP_031080315.1/XP_031080695.1/XP_031083817.1/XP_031083732.1/XP_031087419.1/XP_031082978.1/XP_031081928.1/XP_031081977.1/XP_031088783.1	13
BP	GO:0000920	septum digestion after cytokinesis	4/358	31/3915	0.313569	0.967231	0.967231	XP_031079951.1/XP_031080315.1/XP_031087601.1/XP_031081814.1	4
BP	GO:0007029	endoplasmic reticulum organization	4/358	31/3915	0.313569	0.967231	0.967231	XP_031080222.1/XP_031080315.1/XP_031084047.1/XP_031082585.1	4
BP	GO:0046365	monosaccharide catabolic process	4/358	31/3915	0.313569	0.967231	0.967231	XP_031077138.1/XP_031079702.1/XP_031083678.1/XP_031081548.1	4
BP	GO:0007017	microtubule-based process	12/358	111/3915	0.313881	0.967231	0.967231	XP_031075390.1/XP_031074938.1/XP_031074871.1/XP_031077574.1/XP_031080695.1/XP_031080861.1/XP_031080899.1/XP_031079044.1/XP_031087601.1/XP_031083242.1/XP_031081739.1/XP_031081977.1	12
MF	GO:0060589	nucleoside-triphosphatase regulator activity	12/310	111/3385	0.315475	0.932611	0.932611	XP_031075417.1/XP_031075193.1/XP_031075082.1/XP_031077816.1/XP_031077574.1/XP_031077563.1/XP_031077216.1/XP_031080123.1/XP_031079517.1/XP_031083242.1/XP_031081869.1/XP_031086970.1	12
BP	GO:0000377	RNA splicing, via transesterification reactions with bulged adenosine as nucleophile	15/358	142/3915	0.315971	0.967231	0.967231	XP_031075829.1/XP_031075769.1/XP_031075383.1/XP_031074579.1/XP_031077430.1/XP_031076958.1/XP_031080202.1/XP_031079389.1/XP_031089703.1/XP_031082451.1/XP_031082685.1/XP_031082739.1/XP_031087072.1/XP_031087959.1/XP_031088315.1	15
CC	GO:0000323	lytic vacuole	30/343	300/3769	0.31607	0.93465	0.93465	XP_031075982.1/XP_031075932.1/XP_031075517.1/XP_031075320.1/XP_031075212.1/XP_031075086.1/XP_031077871.1/XP_031077835.1/XP_031077635.1/XP_031077362.1/XP_031079915.1/XP_031080007.1/XP_031080803.1/XP_031079696.1/XP_031079364.1/XP_031079319.1/XP_031083984.1/XP_031083915.1/XP_031083630.1/XP_031087591.1/XP_031087632.1/XP_031082568.1/XP_031081814.1/XP_031081928.1/XP_031087110.1/XP_031089001.1/XP_031087…	30
BP	GO:0016051	carbohydrate biosynthetic process	10/358	91/3915	0.318359	0.967231	0.967231	XP_031075652.1/XP_031080120.1/XP_031080514.1/XP_031079702.1/XP_031078995.1/XP_031083732.1/XP_031083572.1/XP_031083555.1/XP_031081814.1/XP_031088982.1	10
BP	GO:1903825	organic acid transmembrane transport	10/358	91/3915	0.318359	0.967231	0.967231	XP_031080123.1/XP_031080824.1/XP_031080915.1/XP_031079319.1/XP_031084069.1/XP_031083984.1/XP_031087632.1/XP_031082027.1/XP_031086608.1/XP_031085409.1	10
BP	GO:0019953	sexual reproduction	22/358	215/3915	0.318764	0.967231	0.967231	XP_031076249.1/XP_031075320.1/XP_031075193.1/XP_031075082.1/XP_031074765.1/XP_031077854.1/XP_031077613.1/XP_031077288.1/XP_031077286.1/XP_031080222.1/XP_031080315.1/XP_031080598.1/XP_031080695.1/XP_031079610.1/XP_031083732.1/XP_031082916.1/XP_031082978.1/XP_031081814.1/XP_031081869.1/XP_031081928.1/XP_031081977.1/XP_031088783.1	22
BP	GO:0010038	response to metal ion	5/358	41/3915	0.319378	0.967231	0.967231	XP_031076272.1/XP_031077249.1/XP_031079915.1/XP_031080895.1/XP_031083342.1	5
BP	GO:0022406	membrane docking	5/358	41/3915	0.319378	0.967231	0.967231	XP_031080605.1/XP_031084047.1/XP_031084018.1/XP_031087564.1/XP_031087591.1	5
BP	GO:0140056	organelle localization by membrane tethering	5/358	41/3915	0.319378	0.967231	0.967231	XP_031080605.1/XP_031084047.1/XP_031084018.1/XP_031087564.1/XP_031087591.1	5
BP	GO:0009161	ribonucleoside monophosphate metabolic process	9/358	81/3915	0.320178	0.967231	0.967231	XP_031075629.1/XP_031074933.1/XP_031077656.1/XP_031077138.1/XP_031079702.1/XP_031079062.1/XP_031083026.1/XP_031081426.1/XP_031086811.1	9
BP	GO:0045324	late endosome to vacuole transport	6/358	51/3915	0.321723	0.967231	0.967231	XP_031075417.1/XP_031080038.1/XP_031080871.1/XP_031087591.1/XP_031087110.1/XP_031089001.1	6
BP	GO:0019362	pyridine nucleotide metabolic process	7/358	61/3915	0.322187	0.967231	0.967231	XP_031075629.1/XP_031077138.1/XP_031079702.1/XP_031079062.1/XP_031082860.1/XP_031086811.1/XP_031085254.1	7
BP	GO:0006790	sulfur compound metabolic process	16/358	153/3915	0.322464	0.967231	0.967231	XP_031076323.1/XP_031076272.1/XP_031075541.1/XP_031075268.1/XP_031077586.1/XP_031077257.1/XP_031080639.1/XP_031080661.1/XP_031080665.1/XP_031079474.1/XP_031079352.1/XP_031089689.1/XP_031083027.1/XP_031081891.1/XP_031082090.1/XP_031086048.1	16
CC	GO:0009295	nucleoid	3/343	22/3769	0.323646	0.93465	0.93465	XP_031078049.1/XP_031083772.1/XP_031089689.1	3
CC	GO:0030136	clathrin-coated vesicle	3/343	22/3769	0.323646	0.93465	0.93465	XP_031077596.1/XP_031079142.1/XP_031085409.1	3
CC	GO:0031225	anchored component of membrane	3/343	22/3769	0.323646	0.93465	0.93465	XP_031078096.1/XP_031080296.1/XP_031083732.1	3
CC	GO:0032156	septin cytoskeleton	3/343	22/3769	0.323646	0.93465	0.93465	XP_031079044.1/XP_031087641.1/XP_031081814.1	3
CC	GO:0042645	mitochondrial nucleoid	3/343	22/3769	0.323646	0.93465	0.93465	XP_031078049.1/XP_031083772.1/XP_031089689.1	3
CC	GO:0046658	anchored component of plasma membrane	3/343	22/3769	0.323646	0.93465	0.93465	XP_031078096.1/XP_031080296.1/XP_031083732.1	3
CC	GO:0000228	nuclear chromosome	36/343	365/3769	0.324894	0.93465	0.93465	XP_031076249.1/XP_031076197.1/XP_031076045.1/XP_031075968.1/XP_031075390.1/XP_031075200.1/XP_031074871.1/XP_031074816.1/XP_031077810.1/XP_031077603.1/XP_031077424.1/XP_031077249.1/XP_031077200.1/XP_031077189.1/XP_031076726.1/XP_031080076.1/XP_031080695.1/XP_031079462.1/XP_031084058.1/XP_031083817.1/XP_031083571.1/XP_031083543.1/XP_031087411.1/XP_031087419.1/XP_031087542.1/XP_031087641.1/XP_031082…	36
CC	GO:0005773	vacuole	31/343	312/3769	0.32573	0.93465	0.93465	XP_031075982.1/XP_031075932.1/XP_031075517.1/XP_031075320.1/XP_031075212.1/XP_031075086.1/XP_031077871.1/XP_031077835.1/XP_031077635.1/XP_031077362.1/XP_031079915.1/XP_031080007.1/XP_031080803.1/XP_031079696.1/XP_031079364.1/XP_031079319.1/XP_031083984.1/XP_031083915.1/XP_031083630.1/XP_031087591.1/XP_031087632.1/XP_031082568.1/XP_031081814.1/XP_031081928.1/XP_031086937.1/XP_031087110.1/XP_031089…	31
BP	GO:0010948	negative regulation of cell cycle process	15/358	143/3915	0.325902	0.967231	0.967231	XP_031076249.1/XP_031076045.1/XP_031075390.1/XP_031075320.1/XP_031074765.1/XP_031077760.1/XP_031080123.1/XP_031080695.1/XP_031079334.1/XP_031083817.1/XP_031083571.1/XP_031087419.1/XP_031087601.1/XP_031083242.1/XP_031088119.1	15
BP	GO:0009892	negative regulation of metabolic process	45/358	459/3915	0.326329	0.967231	0.967231	XP_031076197.1/XP_031076102.1/XP_031076062.1/XP_031076045.1/XP_031075968.1/XP_031075808.1/XP_031075779.1/XP_031075445.1/XP_031077989.1/XP_031077854.1/XP_031077753.1/XP_031077424.1/XP_031077291.1/XP_031077249.1/XP_031077200.1/XP_031077076.1/XP_031076955.1/XP_031080120.1/XP_031080635.1/XP_031080695.1/XP_031080828.1/XP_031079462.1/XP_031079334.1/XP_031079233.1/XP_031079022.1/XP_031079008.1/XP_031084…	45
BP	GO:0070887	cellular response to chemical stimulus	45/358	459/3915	0.326329	0.967231	0.967231	XP_031076272.1/XP_031076028.1/XP_031075629.1/XP_031075445.1/XP_031075390.1/XP_031075320.1/XP_031074995.1/XP_031074849.1/XP_031074765.1/XP_031074579.1/XP_031077988.1/XP_031077854.1/XP_031077765.1/XP_031077249.1/XP_031077138.1/XP_031076726.1/XP_031080117.1/XP_031080296.1/XP_031080452.1/XP_031080598.1/XP_031080734.1/XP_031080828.1/XP_031080834.1/XP_031079334.1/XP_031078995.1/XP_031078792.1/XP_031078…	45
BP	GO:0000436	carbon catabolite activation of transcription from RNA polymerase II promoter	3/358	22/3915	0.326389	0.967231	0.967231	XP_031077988.1/XP_031076726.1/XP_031083555.1	3
BP	GO:0006415	translational termination	3/358	22/3915	0.326389	0.967231	0.967231	XP_031075445.1/XP_031077900.1/XP_031080135.1	3
BP	GO:1900180	regulation of protein localization to nucleus	3/358	22/3915	0.326389	0.967231	0.967231	XP_031076272.1/XP_031074765.1/XP_031089703.1	3
MF	GO:0005261	cation channel activity	3/310	22/3385	0.32724	0.932611	0.932611	XP_031077635.1/XP_031077325.1/XP_031082027.1	3
MF	GO:0016831	carboxy-lyase activity	3/310	22/3385	0.32724	0.932611	0.932611	XP_031077889.1/XP_031079062.1/XP_031078507.1	3
MF	GO:0005215	transporter activity	33/310	332/3385	0.330799	0.932611	0.932611	XP_031075974.1/XP_031075932.1/XP_031075517.1/XP_031075386.1/XP_031075212.1/XP_031074809.1/XP_031077835.1/XP_031077635.1/XP_031077505.1/XP_031077362.1/XP_031077325.1/XP_031079915.1/XP_031080598.1/XP_031080824.1/XP_031080915.1/XP_031080975.1/XP_031079696.1/XP_031079489.1/XP_031079319.1/XP_031079008.1/XP_031078721.1/XP_031084069.1/XP_031083984.1/XP_031087453.1/XP_031087632.1/XP_031082574.1/XP_031081…	33
BP	GO:1901617	organic hydroxy compound biosynthetic process	10/358	92/3915	0.330801	0.967231	0.967231	XP_031077765.1/XP_031077586.1/XP_031080665.1/XP_031080872.1/XP_031079062.1/XP_031078776.1/XP_031083572.1/XP_031086574.1/XP_031086811.1/XP_031088960.1	10
CC	GO:0032993	protein-DNA complex	7/343	62/3769	0.332932	0.93465	0.93465	XP_031076197.1/XP_031083817.1/XP_031087411.1/XP_031087419.1/XP_031087542.1/XP_031081739.1/XP_031086974.1	7
MF	GO:0030234	enzyme regulator activity	23/310	227/3385	0.333267	0.932611	0.932611	XP_031076102.1/XP_031075779.1/XP_031075417.1/XP_031075193.1/XP_031075082.1/XP_031077816.1/XP_031077574.1/XP_031077563.1/XP_031077216.1/XP_031076958.1/XP_031080123.1/XP_031079517.1/XP_031083543.1/XP_031087419.1/XP_031083242.1/XP_031081471.1/XP_031081529.1/XP_031081869.1/XP_031081872.1/XP_031082013.1/XP_031086970.1/XP_031087981.1/XP_031088119.1	23
BP	GO:0000956	nuclear-transcribed mRNA catabolic process	9/358	82/3915	0.333401	0.967231	0.967231	XP_031076197.1/XP_031076062.1/XP_031075445.1/XP_031077854.1/XP_031077291.1/XP_031076955.1/XP_031079462.1/XP_031079233.1/XP_031082412.1	9
CC	GO:0005680	anaphase-promoting complex	2/343	13/3769	0.334312	0.93465	0.93465	XP_031081824.1/XP_031082013.1	2
CC	GO:0030665	clathrin-coated vesicle membrane	2/343	13/3769	0.334312	0.93465	0.93465	XP_031077596.1/XP_031079142.1	2
CC	GO:0031011	Ino80 complex	2/343	13/3769	0.334312	0.93465	0.93465	XP_031076197.1/XP_031080076.1	2
CC	GO:0005856	cytoskeleton	22/343	218/3769	0.334611	0.93465	0.93465	XP_031075768.1/XP_031075390.1/XP_031075082.1/XP_031074938.1/XP_031074871.1/XP_031077724.1/XP_031077613.1/XP_031077574.1/XP_031080052.1/XP_031080315.1/XP_031080695.1/XP_031080861.1/XP_031080899.1/XP_031079154.1/XP_031079044.1/XP_031087601.1/XP_031087641.1/XP_031082939.1/XP_031083242.1/XP_031081814.1/XP_031081869.1/XP_031088783.1	22
BP	GO:0006893	Golgi to plasma membrane transport	4/358	32/3915	0.335087	0.967231	0.967231	XP_031079951.1/XP_031080315.1/XP_031079008.1/XP_031081977.1	4
BP	GO:0015807	L-amino acid transport	4/358	32/3915	0.335087	0.967231	0.967231	XP_031080123.1/XP_031079319.1/XP_031087632.1/XP_031082027.1	4
BP	GO:0071467	cellular response to pH	4/358	32/3915	0.335087	0.967231	0.967231	XP_031076272.1/XP_031075541.1/XP_031079334.1/XP_031081891.1	4
BP	GO:1902475	L-alpha-amino acid transmembrane transport	4/358	32/3915	0.335087	0.967231	0.967231	XP_031080123.1/XP_031079319.1/XP_031087632.1/XP_031082027.1	4
BP	GO:1905268	negative regulation of chromatin organization	4/358	32/3915	0.335087	0.967231	0.967231	XP_031076197.1/XP_031075968.1/XP_031082799.1/XP_031082893.1	4
MF	GO:0003743	translation initiation factor activity	4/310	32/3385	0.336096	0.932611	0.932611	XP_031075875.1/XP_031077900.1/XP_031077760.1/XP_031080493.1	4
MF	GO:0008173	RNA methyltransferase activity	4/310	32/3385	0.336096	0.932611	0.932611	XP_031079223.1/XP_031084345.1/XP_031082064.1/XP_031086923.1	4
BP	GO:0001410	chlamydospore formation	2/358	13/3915	0.336487	0.967231	0.967231	XP_031075320.1/XP_031081891.1	2
BP	GO:0006074	(1->3)-beta-D-glucan metabolic process	2/358	13/3915	0.336487	0.967231	0.967231	XP_031075883.1/XP_031083732.1	2
BP	GO:0009225	nucleotide-sugar metabolic process	2/358	13/3915	0.336487	0.967231	0.967231	XP_031075652.1/XP_031078995.1	2
BP	GO:0032890	regulation of organic acid transport	2/358	13/3915	0.336487	0.967231	0.967231	XP_031080123.1/XP_031085409.1	2
BP	GO:0034305	regulation of asexual sporulation	2/358	13/3915	0.336487	0.967231	0.967231	XP_031080222.1/XP_031083699.1	2
BP	GO:0035493	SNARE complex assembly	2/358	13/3915	0.336487	0.967231	0.967231	XP_031084018.1/XP_031087591.1	2
BP	GO:0042402	cellular biogenic amine catabolic process	2/358	13/3915	0.336487	0.967231	0.967231	XP_031079062.1/XP_031078681.1	2
BP	GO:0042744	hydrogen peroxide catabolic process	2/358	13/3915	0.336487	0.967231	0.967231	XP_031078792.1/XP_031078697.1	2
BP	GO:0043001	Golgi to plasma membrane protein transport	2/358	13/3915	0.336487	0.967231	0.967231	XP_031079008.1/XP_031081977.1	2
BP	GO:0043938	positive regulation of sporulation	2/358	13/3915	0.336487	0.967231	0.967231	XP_031080222.1/XP_031083699.1	2
BP	GO:0046128	purine ribonucleoside metabolic process	2/358	13/3915	0.336487	0.967231	0.967231	XP_031082436.1/XP_031083026.1	2
BP	GO:0048017	inositol lipid-mediated signaling	2/358	13/3915	0.336487	0.967231	0.967231	XP_031075768.1/XP_031087597.1	2
BP	GO:0048194	Golgi vesicle budding	2/358	13/3915	0.336487	0.967231	0.967231	XP_031080598.1/XP_031081977.1	2
BP	GO:0051055	negative regulation of lipid biosynthetic process	2/358	13/3915	0.336487	0.967231	0.967231	XP_031079008.1/XP_031081977.1	2
BP	GO:0071073	positive regulation of phospholipid biosynthetic process	2/358	13/3915	0.336487	0.967231	0.967231	XP_031079008.1/XP_031083915.1	2
BP	GO:0075306	regulation of conidium formation	2/358	13/3915	0.336487	0.967231	0.967231	XP_031080222.1/XP_031083699.1	2
BP	GO:0099022	vesicle tethering	2/358	13/3915	0.336487	0.967231	0.967231	XP_031080315.1/XP_031087591.1	2
BP	GO:0110154	RNA decapping	2/358	13/3915	0.336487	0.967231	0.967231	XP_031077854.1/XP_031082412.1	2
BP	GO:0110156	methylguanosine-cap decapping	2/358	13/3915	0.336487	0.967231	0.967231	XP_031077854.1/XP_031082412.1	2
BP	GO:1903727	positive regulation of phospholipid metabolic process	2/358	13/3915	0.336487	0.967231	0.967231	XP_031079008.1/XP_031083915.1	2
BP	GO:1903959	regulation of anion transmembrane transport	2/358	13/3915	0.336487	0.967231	0.967231	XP_031080123.1/XP_031085409.1	2
MF	GO:0016790	thiolester hydrolase activity	2/310	13/3385	0.33718	0.932611	0.932611	XP_031076323.1/XP_031086048.1	2
BP	GO:0001934	positive regulation of protein phosphorylation	7/358	62/3915	0.337495	0.967231	0.967231	XP_031075082.1/XP_031077753.1/XP_031077200.1/XP_031080635.1/XP_031087419.1/XP_031081471.1/XP_031088119.1	7
BP	GO:0043487	regulation of RNA stability	7/358	62/3915	0.337495	0.967231	0.967231	XP_031075445.1/XP_031077854.1/XP_031077291.1/XP_031076955.1/XP_031079462.1/XP_031079233.1/XP_031082412.1	7
BP	GO:0043488	regulation of mRNA stability	7/358	62/3915	0.337495	0.967231	0.967231	XP_031075445.1/XP_031077854.1/XP_031077291.1/XP_031076955.1/XP_031079462.1/XP_031079233.1/XP_031082412.1	7
BP	GO:0060627	regulation of vesicle-mediated transport	7/358	62/3915	0.337495	0.967231	0.967231	XP_031079517.1/XP_031084018.1/XP_031083630.1/XP_031087591.1/XP_031081814.1/XP_031086970.1/XP_031085409.1	7
BP	GO:0010605	negative regulation of macromolecule metabolic process	42/358	429/3915	0.337687	0.967231	0.967231	XP_031076197.1/XP_031076102.1/XP_031076062.1/XP_031076045.1/XP_031075968.1/XP_031075808.1/XP_031075779.1/XP_031075445.1/XP_031077989.1/XP_031077854.1/XP_031077753.1/XP_031077424.1/XP_031077291.1/XP_031077249.1/XP_031077200.1/XP_031077076.1/XP_031076955.1/XP_031080635.1/XP_031080695.1/XP_031080828.1/XP_031079462.1/XP_031079334.1/XP_031079233.1/XP_031079022.1/XP_031084047.1/XP_031083817.1/XP_031083…	42
BP	GO:0002183	cytoplasmic translational initiation	5/358	42/3915	0.338099	0.967231	0.967231	XP_031077900.1/XP_031077760.1/XP_031080493.1/XP_031079334.1/XP_031088194.1	5
BP	GO:0036267	invasive filamentous growth	5/358	42/3915	0.338099	0.967231	0.967231	XP_031076272.1/XP_031075541.1/XP_031075082.1/XP_031080117.1/XP_031081814.1	5
BP	GO:0043087	regulation of GTPase activity	6/358	52/3915	0.338493	0.967231	0.967231	XP_031075193.1/XP_031075082.1/XP_031077574.1/XP_031080123.1/XP_031079517.1/XP_031086970.1	6
BP	GO:1902652	secondary alcohol metabolic process	6/358	52/3915	0.338493	0.967231	0.967231	XP_031078049.1/XP_031077765.1/XP_031077586.1/XP_031080872.1/XP_031086574.1/XP_031088960.1	6
BP	GO:2000242	negative regulation of reproductive process	6/358	52/3915	0.338493	0.967231	0.967231	XP_031076045.1/XP_031075320.1/XP_031074765.1/XP_031083817.1/XP_031083543.1/XP_031082916.1	6
BP	GO:0006397	mRNA processing	19/358	186/3915	0.338762	0.967231	0.967231	XP_031075829.1/XP_031075769.1/XP_031075383.1/XP_031074579.1/XP_031077753.1/XP_031077430.1/XP_031076958.1/XP_031080202.1/XP_031080635.1/XP_031080826.1/XP_031079389.1/XP_031089703.1/XP_031082451.1/XP_031082685.1/XP_031082739.1/XP_031086938.1/XP_031087072.1/XP_031087959.1/XP_031088315.1	19
MF	GO:0019887	protein kinase regulator activity	5/310	42/3385	0.339238	0.932611	0.932611	XP_031076102.1/XP_031083543.1/XP_031087419.1/XP_031081471.1/XP_031088119.1	5
BP	GO:0006644	phospholipid metabolic process	14/358	134/3915	0.339784	0.967231	0.967231	XP_031076028.1/XP_031075768.1/XP_031077586.1/XP_031080857.1/XP_031079008.1/XP_031078906.1/XP_031084047.1/XP_031083915.1/XP_031083630.1/XP_031082994.1/XP_031081977.1/XP_031086769.1/XP_031086989.1/XP_031087961.1	14
BP	GO:0010628	positive regulation of gene expression	28/358	281/3915	0.341359	0.967231	0.967231	XP_031075808.1/XP_031075534.1/XP_031075320.1/XP_031074813.1/XP_031074691.1/XP_031077988.1/XP_031077854.1/XP_031077810.1/XP_031077753.1/XP_031077424.1/XP_031077249.1/XP_031076955.1/XP_031076726.1/XP_031080493.1/XP_031080635.1/XP_031084058.1/XP_031083956.1/XP_031083555.1/XP_031087352.1/XP_031087641.1/XP_031087729.1/XP_031089703.1/XP_031082799.1/XP_031082893.1/XP_031082916.1/XP_031081872.1/XP_031088…	28
MF	GO:0098772	molecular function regulator activity	23/310	228/3385	0.341363	0.932611	0.932611	XP_031076102.1/XP_031075779.1/XP_031075417.1/XP_031075193.1/XP_031075082.1/XP_031077816.1/XP_031077574.1/XP_031077563.1/XP_031077216.1/XP_031076958.1/XP_031080123.1/XP_031079517.1/XP_031083543.1/XP_031087419.1/XP_031083242.1/XP_031081471.1/XP_031081529.1/XP_031081869.1/XP_031081872.1/XP_031082013.1/XP_031086970.1/XP_031087981.1/XP_031088119.1	23
CC	GO:0005618	cell wall	9/343	83/3769	0.341399	0.93465	0.93465	XP_031075883.1/XP_031078096.1/XP_031080296.1/XP_031079294.1/XP_031078792.1/XP_031083732.1/XP_031083572.1/XP_031082568.1/XP_031081241.1	9
BP	GO:0006364	rRNA processing	22/358	218/3915	0.343328	0.967231	0.967231	XP_031076062.1/XP_031076000.1/XP_031075875.1/XP_031075508.1/XP_031075017.1/XP_031074691.1/XP_031077730.1/XP_031080635.1/XP_031080695.1/XP_031080834.1/XP_031079462.1/XP_031079223.1/XP_031079174.1/XP_031084345.1/XP_031087645.1/XP_031087711.1/XP_031082638.1/XP_031081510.1/XP_031081550.1/XP_031081551.1/XP_031081702.1/XP_031086923.1	22
BP	GO:0000075	cell cycle checkpoint signaling	10/358	93/3915	0.343337	0.967231	0.967231	XP_031076249.1/XP_031076045.1/XP_031075390.1/XP_031077760.1/XP_031080695.1/XP_031079334.1/XP_031083571.1/XP_031087419.1/XP_031087601.1/XP_031088119.1	10
CC	GO:0043596	nuclear replication fork	7/343	63/3769	0.348238	0.93465	0.93465	XP_031077200.1/XP_031077189.1/XP_031083571.1/XP_031087411.1/XP_031087419.1/XP_031087542.1/XP_031086974.1	7
BP	GO:0009126	purine nucleoside monophosphate metabolic process	8/358	73/3915	0.349948	0.967231	0.967231	XP_031075629.1/XP_031074933.1/XP_031077138.1/XP_031079702.1/XP_031079062.1/XP_031083026.1/XP_031081426.1/XP_031086811.1	8
BP	GO:0009167	purine ribonucleoside monophosphate metabolic process	8/358	73/3915	0.349948	0.967231	0.967231	XP_031075629.1/XP_031074933.1/XP_031077138.1/XP_031079702.1/XP_031079062.1/XP_031083026.1/XP_031081426.1/XP_031086811.1	8
BP	GO:1902969	mitotic DNA replication	8/358	73/3915	0.349948	0.967231	0.967231	XP_031077189.1/XP_031089054.1/XP_031083817.1/XP_031083571.1/XP_031087411.1/XP_031087419.1/XP_031087542.1/XP_031086974.1	8
BP	GO:0043934	sporulation	14/358	135/3915	0.350266	0.967231	0.967231	XP_031076272.1/XP_031076249.1/XP_031075320.1/XP_031077613.1/XP_031077288.1/XP_031080222.1/XP_031080315.1/XP_031080695.1/XP_031083732.1/XP_031083699.1/XP_031082978.1/XP_031081891.1/XP_031081977.1/XP_031088783.1	14
BP	GO:0006900	vesicle budding from membrane	3/358	23/3915	0.352411	0.967231	0.967231	XP_031080598.1/XP_031081977.1/XP_031086970.1	3
BP	GO:0031126	sno(s)RNA 3'-end processing	3/358	23/3915	0.352411	0.967231	0.967231	XP_031080635.1/XP_031079462.1/XP_031086923.1	3
BP	GO:0046034	ATP metabolic process	7/358	63/3915	0.352899	0.967231	0.967231	XP_031075629.1/XP_031074933.1/XP_031077138.1/XP_031079702.1/XP_031079062.1/XP_031081426.1/XP_031086811.1	7
BP	GO:0061013	regulation of mRNA catabolic process	7/358	63/3915	0.352899	0.967231	0.967231	XP_031075445.1/XP_031077854.1/XP_031077291.1/XP_031076955.1/XP_031079462.1/XP_031079233.1/XP_031082412.1	7
MF	GO:0042803	protein homodimerization activity	3/310	23/3385	0.353312	0.932611	0.932611	XP_031083566.1/XP_031081548.1/XP_031081925.1	3
BP	GO:0051248	negative regulation of protein metabolic process	13/358	125/3915	0.354662	0.967231	0.967231	XP_031076102.1/XP_031075968.1/XP_031075445.1/XP_031077854.1/XP_031077291.1/XP_031076955.1/XP_031080828.1/XP_031079462.1/XP_031079334.1/XP_031079233.1/XP_031083543.1/XP_031087641.1/XP_031082412.1	13
MF	GO:0008134	transcription factor binding	6/310	53/3385	0.356651	0.932611	0.932611	XP_031075808.1/XP_031077249.1/XP_031080570.1/XP_031082859.1/XP_031082916.1/XP_031088297.1	6
BP	GO:0000302	response to reactive oxygen species	5/358	43/3915	0.356905	0.967231	0.967231	XP_031079334.1/XP_031078792.1/XP_031078697.1/XP_031086937.1/XP_031088960.1	5
BP	GO:0051495	positive regulation of cytoskeleton organization	5/358	43/3915	0.356905	0.967231	0.967231	XP_031075390.1/XP_031075082.1/XP_031080695.1/XP_031082939.1/XP_031088783.1	5
BP	GO:0042325	regulation of phosphorylation	12/358	115/3915	0.359183	0.967231	0.967231	XP_031076102.1/XP_031075082.1/XP_031077753.1/XP_031077200.1/XP_031080635.1/XP_031080828.1/XP_031083915.1/XP_031083630.1/XP_031083543.1/XP_031087419.1/XP_031081471.1/XP_031088119.1	12
CC	GO:0034399	nuclear periphery	8/343	74/3769	0.359184	0.93465	0.93465	XP_031075215.1/XP_031074938.1/XP_031074809.1/XP_031074765.1/XP_031083571.1/XP_031083015.1/XP_031081729.1/XP_031087961.1	8
BP	GO:0019954	asexual reproduction	9/358	84/3915	0.360116	0.967231	0.967231	XP_031075320.1/XP_031075082.1/XP_031077613.1/XP_031080222.1/XP_031080296.1/XP_031080695.1/XP_031083699.1/XP_031081814.1/XP_031081891.1	9
BP	GO:0030437	ascospore formation	9/358	84/3915	0.360116	0.967231	0.967231	XP_031076249.1/XP_031077613.1/XP_031077288.1/XP_031080315.1/XP_031080695.1/XP_031083732.1/XP_031082978.1/XP_031081977.1/XP_031088783.1	9
BP	GO:0051345	positive regulation of hydrolase activity	9/358	84/3915	0.360116	0.967231	0.967231	XP_031075193.1/XP_031075082.1/XP_031077574.1/XP_031077563.1/XP_031077216.1/XP_031080123.1/XP_031079517.1/XP_031079022.1/XP_031086970.1	9
BP	GO:0016053	organic acid biosynthetic process	20/358	199/3915	0.36083	0.967231	0.967231	XP_031076272.1/XP_031075629.1/XP_031075541.1/XP_031075183.1/XP_031078049.1/XP_031077989.1/XP_031077623.1/XP_031077592.1/XP_031077257.1/XP_031077235.1/XP_031077138.1/XP_031080038.1/XP_031080117.1/XP_031080639.1/XP_031079702.1/XP_031079474.1/XP_031079008.1/XP_031083772.1/XP_031083566.1/XP_031081891.1	20
BP	GO:0046394	carboxylic acid biosynthetic process	20/358	199/3915	0.36083	0.967231	0.967231	XP_031076272.1/XP_031075629.1/XP_031075541.1/XP_031075183.1/XP_031078049.1/XP_031077989.1/XP_031077623.1/XP_031077592.1/XP_031077257.1/XP_031077235.1/XP_031077138.1/XP_031080038.1/XP_031080117.1/XP_031080639.1/XP_031079702.1/XP_031079474.1/XP_031079008.1/XP_031083772.1/XP_031083566.1/XP_031081891.1	20
BP	GO:0006270	DNA replication initiation	7/358	64/3915	0.368373	0.967231	0.967231	XP_031075829.1/XP_031077200.1/XP_031080895.1/XP_031083571.1/XP_031087419.1/XP_031087542.1/XP_031086974.1	7
BP	GO:1900428	regulation of filamentous growth of a population of unicellular organisms	7/358	64/3915	0.368373	0.967231	0.967231	XP_031076272.1/XP_031075541.1/XP_031075320.1/XP_031077765.1/XP_031083543.1/XP_031087533.1/XP_031081814.1	7
MF	GO:0019899	enzyme binding	17/310	168/3385	0.36839	0.932611	0.932611	XP_031075417.1/XP_031075198.1/XP_031075082.1/XP_031077753.1/XP_031077291.1/XP_031077189.1/XP_031080135.1/XP_031080190.1/XP_031080635.1/XP_031079517.1/XP_031083242.1/XP_031081869.1/XP_031086938.1/XP_031087019.1/XP_031088892.1/XP_031088297.1/XP_031085409.1	17
CC	GO:0005852	eukaryotic translation initiation factor 3 complex	2/343	14/3769	0.368642	0.93465	0.93465	XP_031075875.1/XP_031077900.1	2
CC	GO:0016282	eukaryotic 43S preinitiation complex	2/343	14/3769	0.368642	0.93465	0.93465	XP_031077900.1/XP_031080493.1	2
CC	GO:0034506	chromosome, centromeric core domain	2/343	14/3769	0.368642	0.93465	0.93465	XP_031080695.1/XP_031081739.1	2
BP	GO:0009605	response to external stimulus	25/358	253/3915	0.369991	0.967231	0.967231	XP_031075779.1/XP_031075541.1/XP_031075534.1/XP_031075386.1/XP_031075320.1/XP_031077988.1/XP_031077765.1/XP_031077505.1/XP_031077249.1/XP_031077076.1/XP_031076726.1/XP_031080117.1/XP_031080828.1/XP_031079334.1/XP_031078792.1/XP_031083555.1/XP_031083543.1/XP_031087597.1/XP_031082731.1/XP_031082916.1/XP_031081700.1/XP_031081869.1/XP_031086989.1/XP_031088871.1/XP_031088960.1	25
BP	GO:0061982	meiosis I cell cycle process	12/358	116/3915	0.37068	0.967231	0.967231	XP_031076249.1/XP_031075968.1/XP_031075215.1/XP_031074938.1/XP_031077603.1/XP_031080861.1/XP_031079022.1/XP_031083817.1/XP_031087601.1/XP_031087641.1/XP_031082671.1/XP_031088031.1	12
BP	GO:0007121	bipolar cellular bud site selection	2/358	14/3915	0.370946	0.967231	0.967231	XP_031075082.1/XP_031077613.1	2
BP	GO:0009403	toxin biosynthetic process	2/358	14/3915	0.370946	0.967231	0.967231	XP_031074564.1/XP_031083699.1	2
BP	GO:0010720	positive regulation of cell development	2/358	14/3915	0.370946	0.967231	0.967231	XP_031080222.1/XP_031083699.1	2
BP	GO:0016239	positive regulation of macroautophagy	2/358	14/3915	0.370946	0.967231	0.967231	XP_031077138.1/XP_031087019.1	2
BP	GO:0019400	alditol metabolic process	2/358	14/3915	0.370946	0.967231	0.967231	XP_031088206.1/XP_031085254.1	2
BP	GO:0019722	calcium-mediated signaling	2/358	14/3915	0.370946	0.967231	0.967231	XP_031079482.1/XP_031088871.1	2
BP	GO:0032889	regulation of vacuole fusion, non-autophagic	2/358	14/3915	0.370946	0.967231	0.967231	XP_031087591.1/XP_031081814.1	2
BP	GO:0043392	negative regulation of DNA binding	2/358	14/3915	0.370946	0.967231	0.967231	XP_031075445.1/XP_031083817.1	2
BP	GO:0043484	regulation of RNA splicing	2/358	14/3915	0.370946	0.967231	0.967231	XP_031074813.1/XP_031089703.1	2
BP	GO:0044091	membrane biogenesis	2/358	14/3915	0.370946	0.967231	0.967231	XP_031077288.1/XP_031080315.1	2
BP	GO:0046503	glycerolipid catabolic process	2/358	14/3915	0.370946	0.967231	0.967231	XP_031076028.1/XP_031078906.1	2
BP	GO:0060236	regulation of mitotic spindle organization	2/358	14/3915	0.370946	0.967231	0.967231	XP_031075390.1/XP_031083242.1	2
BP	GO:0061647	histone H3-K9 modification	2/358	14/3915	0.370946	0.967231	0.967231	XP_031075968.1/XP_031081529.1	2
BP	GO:0072595	maintenance of protein localization in organelle	2/358	14/3915	0.370946	0.967231	0.967231	XP_031089703.1/XP_031086989.1	2
BP	GO:0090224	regulation of spindle organization	2/358	14/3915	0.370946	0.967231	0.967231	XP_031075390.1/XP_031083242.1	2
BP	GO:0097307	response to farnesol	2/358	14/3915	0.370946	0.967231	0.967231	XP_031080117.1/XP_031086811.1	2
BP	GO:0097308	cellular response to farnesol	2/358	14/3915	0.370946	0.967231	0.967231	XP_031080117.1/XP_031086811.1	2
BP	GO:0140029	exocytic process	2/358	14/3915	0.370946	0.967231	0.967231	XP_031080315.1/XP_031084018.1	2
BP	GO:1904062	regulation of cation transmembrane transport	2/358	14/3915	0.370946	0.967231	0.967231	XP_031080123.1/XP_031085409.1	2
BP	GO:0006357	regulation of transcription by RNA polymerase II	37/358	381/3915	0.371079	0.967231	0.967231	XP_031076197.1/XP_031075968.1/XP_031075846.1/XP_031075808.1/XP_031075779.1/XP_031075534.1/XP_031075445.1/XP_031075320.1/XP_031074849.1/XP_031074816.1/XP_031077989.1/XP_031077988.1/XP_031077854.1/XP_031077810.1/XP_031077753.1/XP_031077424.1/XP_031077291.1/XP_031077249.1/XP_031077076.1/XP_031076955.1/XP_031076726.1/XP_031080052.1/XP_031080635.1/XP_031080695.1/XP_031079389.1/XP_031084058.1/XP_031083…	37
BP	GO:0032505	reproduction of a single-celled organism	16/358	158/3915	0.371302	0.967231	0.967231	XP_031076249.1/XP_031075968.1/XP_031075082.1/XP_031077613.1/XP_031077288.1/XP_031080296.1/XP_031080315.1/XP_031080695.1/XP_031083817.1/XP_031083732.1/XP_031087419.1/XP_031082978.1/XP_031081814.1/XP_031081928.1/XP_031081977.1/XP_031088783.1	16
BP	GO:0045786	negative regulation of cell cycle	16/358	158/3915	0.371302	0.967231	0.967231	XP_031076249.1/XP_031076045.1/XP_031075390.1/XP_031075320.1/XP_031074765.1/XP_031077760.1/XP_031080123.1/XP_031080695.1/XP_031079334.1/XP_031083817.1/XP_031083571.1/XP_031083543.1/XP_031087419.1/XP_031087601.1/XP_031083242.1/XP_031088119.1	16
BP	GO:0034599	cellular response to oxidative stress	14/358	137/3915	0.371404	0.967231	0.967231	XP_031075629.1/XP_031075320.1/XP_031074995.1/XP_031074849.1/XP_031074765.1/XP_031080452.1/XP_031079334.1/XP_031078792.1/XP_031078697.1/XP_031083817.1/XP_031083342.1/XP_031081739.1/XP_031086937.1/XP_031088960.1	14
MF	GO:0001671	ATPase activator activity	2/310	14/3385	0.37169	0.932611	0.932611	XP_031077563.1/XP_031077216.1	2
MF	GO:0019200	carbohydrate kinase activity	2/310	14/3385	0.37169	0.932611	0.932611	XP_031077138.1/XP_031086975.1	2
MF	GO:0034212	peptide N-acetyltransferase activity	2/310	14/3385	0.37169	0.932611	0.932611	XP_031075138.1/XP_031082799.1	2
MF	GO:0046527	glucosyltransferase activity	2/310	14/3385	0.37169	0.932611	0.932611	XP_031080514.1/XP_031078995.1	2
MF	GO:0140677	molecular function activator activity	2/310	14/3385	0.37169	0.932611	0.932611	XP_031077563.1/XP_031077216.1	2
CC	GO:0032040	small-subunit processome	5/343	44/3769	0.371778	0.93465	0.93465	XP_031076000.1/XP_031074691.1/XP_031081550.1/XP_031081702.1/XP_031086923.1	5
CC	GO:0071014	post-mRNA release spliceosomal complex	5/343	44/3769	0.371778	0.93465	0.93465	XP_031075829.1/XP_031074579.1/XP_031079389.1/XP_031087959.1/XP_031088315.1	5
BP	GO:0016482	cytosolic transport	6/358	54/3915	0.37228	0.967231	0.967231	XP_031075417.1/XP_031077288.1/XP_031079951.1/XP_031080222.1/XP_031087591.1/XP_031087019.1	6
BP	GO:0034470	ncRNA processing	32/358	328/3915	0.373717	0.967231	0.967231	XP_031076062.1/XP_031076000.1/XP_031075875.1/XP_031075508.1/XP_031075320.1/XP_031075017.1/XP_031074691.1/XP_031077730.1/XP_031077506.1/XP_031077072.1/XP_031080052.1/XP_031080635.1/XP_031080695.1/XP_031080712.1/XP_031080826.1/XP_031080834.1/XP_031079462.1/XP_031079223.1/XP_031079174.1/XP_031084345.1/XP_031087352.1/XP_031087361.1/XP_031087645.1/XP_031087711.1/XP_031082638.1/XP_031081510.1/XP_031081…	32
BP	GO:0006338	chromatin remodeling	19/358	190/3915	0.374714	0.967231	0.967231	XP_031076197.1/XP_031075968.1/XP_031075779.1/XP_031074816.1/XP_031077810.1/XP_031077200.1/XP_031080076.1/XP_031080635.1/XP_031080695.1/XP_031079022.1/XP_031083571.1/XP_031087597.1/XP_031082799.1/XP_031082893.1/XP_031082916.1/XP_031081529.1/XP_031081872.1/XP_031086838.1/XP_031086974.1	19
CC	GO:0000932	P-body	4/343	34/3769	0.374727	0.93465	0.93465	XP_031077854.1/XP_031076955.1/XP_031087729.1/XP_031082412.1	4
CC	GO:0005794	Golgi apparatus	19/343	191/3769	0.375431	0.93465	0.93465	XP_031076102.1/XP_031075982.1/XP_031075356.1/XP_031077362.1/XP_031079915.1/XP_031079951.1/XP_031080222.1/XP_031080598.1/XP_031079142.1/XP_031079045.1/XP_031084018.1/XP_031087453.1/XP_031082994.1/XP_031081977.1/XP_031086927.1/XP_031087019.1/XP_031088892.1/XP_031089001.1/XP_031085409.1	19
BP	GO:0007114	cell budding	5/358	44/3915	0.37575	0.967231	0.967231	XP_031075082.1/XP_031077613.1/XP_031080296.1/XP_031080695.1/XP_031081814.1	5
BP	GO:0005976	polysaccharide metabolic process	11/358	106/3915	0.375909	0.967231	0.967231	XP_031075883.1/XP_031075779.1/XP_031075652.1/XP_031075429.1/XP_031078096.1/XP_031080514.1/XP_031080695.1/XP_031078995.1/XP_031083732.1/XP_031081814.1/XP_031088982.1	11
BP	GO:0008654	phospholipid biosynthetic process	11/358	106/3915	0.375909	0.967231	0.967231	XP_031075768.1/XP_031077586.1/XP_031080857.1/XP_031079008.1/XP_031078906.1/XP_031084047.1/XP_031083915.1/XP_031082994.1/XP_031081977.1/XP_031086769.1/XP_031087961.1	11
MF	GO:0019207	kinase regulator activity	5/310	44/3385	0.376983	0.932611	0.932611	XP_031076102.1/XP_031083543.1/XP_031087419.1/XP_031081471.1/XP_031088119.1	5
BP	GO:0010629	negative regulation of gene expression	34/358	350/3915	0.378169	0.967231	0.967231	XP_031076197.1/XP_031076062.1/XP_031076045.1/XP_031075968.1/XP_031075808.1/XP_031075779.1/XP_031075445.1/XP_031077989.1/XP_031077854.1/XP_031077424.1/XP_031077291.1/XP_031077249.1/XP_031077200.1/XP_031077076.1/XP_031076955.1/XP_031080635.1/XP_031080695.1/XP_031079462.1/XP_031079334.1/XP_031079233.1/XP_031079022.1/XP_031084047.1/XP_031083571.1/XP_031087533.1/XP_031087597.1/XP_031082412.1/XP_031082…	34
BP	GO:0000027	ribosomal large subunit assembly	4/358	34/3915	0.378237	0.967231	0.967231	XP_031077225.1/XP_031080834.1/XP_031079174.1/XP_031087711.1	4
BP	GO:0031056	regulation of histone modification	4/358	34/3915	0.378237	0.967231	0.967231	XP_031075968.1/XP_031077753.1/XP_031080635.1/XP_031081529.1	4
BP	GO:0072659	protein localization to plasma membrane	4/358	34/3915	0.378237	0.967231	0.967231	XP_031080190.1/XP_031079008.1/XP_031083060.1/XP_031081977.1	4
BP	GO:1901264	carbohydrate derivative transport	4/358	34/3915	0.378237	0.967231	0.967231	XP_031079489.1/XP_031087453.1/XP_031087712.1/XP_031082574.1	4
BP	GO:0000154	rRNA modification	3/358	24/3915	0.378312	0.967231	0.967231	XP_031079223.1/XP_031084345.1/XP_031086923.1	3
BP	GO:0001505	regulation of neurotransmitter levels	3/358	24/3915	0.378312	0.967231	0.967231	XP_031074995.1/XP_031080117.1/XP_031081700.1	3
BP	GO:0006303	double-strand break repair via nonhomologous end joining	3/358	24/3915	0.378312	0.967231	0.967231	XP_031076249.1/XP_031075200.1/XP_031089719.1	3
BP	GO:0006469	negative regulation of protein kinase activity	3/358	24/3915	0.378312	0.967231	0.967231	XP_031076102.1/XP_031080828.1/XP_031083543.1	3
BP	GO:0007117	budding cell bud growth	3/358	24/3915	0.378312	0.967231	0.967231	XP_031075082.1/XP_031080296.1/XP_031081814.1	3
BP	GO:0033673	negative regulation of kinase activity	3/358	24/3915	0.378312	0.967231	0.967231	XP_031076102.1/XP_031080828.1/XP_031083543.1	3
BP	GO:0044396	actin cortical patch organization	3/358	24/3915	0.378312	0.967231	0.967231	XP_031077613.1/XP_031082939.1/XP_031088783.1	3
BP	GO:0051204	protein insertion into mitochondrial membrane	3/358	24/3915	0.378312	0.967231	0.967231	XP_031087564.1/XP_031083105.1/XP_031081426.1	3
BP	GO:0061077	chaperone-mediated protein folding	3/358	24/3915	0.378312	0.967231	0.967231	XP_031077724.1/XP_031080803.1/XP_031079154.1	3
BP	GO:0070590	spore wall biogenesis	3/358	24/3915	0.378312	0.967231	0.967231	XP_031077613.1/XP_031083732.1/XP_031088783.1	3
BP	GO:0090151	establishment of protein localization to mitochondrial membrane	3/358	24/3915	0.378312	0.967231	0.967231	XP_031087564.1/XP_031083105.1/XP_031081426.1	3
BP	GO:1905269	positive regulation of chromatin organization	3/358	24/3915	0.378312	0.967231	0.967231	XP_031075968.1/XP_031077753.1/XP_031080635.1	3
BP	GO:0016310	phosphorylation	31/358	318/3915	0.378456	0.967231	0.967231	XP_031076102.1/XP_031076045.1/XP_031075629.1/XP_031075320.1/XP_031075082.1/XP_031074933.1/XP_031074765.1/XP_031077753.1/XP_031077586.1/XP_031077200.1/XP_031077138.1/XP_031080452.1/XP_031080635.1/XP_031080665.1/XP_031080828.1/XP_031079702.1/XP_031079334.1/XP_031083915.1/XP_031083630.1/XP_031083543.1/XP_031087352.1/XP_031087419.1/XP_031089703.1/XP_031082647.1/XP_031081426.1/XP_031081471.1/XP_031081…	31
MF	GO:0046914	transition metal ion binding	15/310	148/3385	0.37865	0.932611	0.932611	XP_031076249.1/XP_031076094.1/XP_031075846.1/XP_031075534.1/XP_031075445.1/XP_031074933.1/XP_031077385.1/XP_031077249.1/XP_031076726.1/XP_031080135.1/XP_031080190.1/XP_031083555.1/XP_031082685.1/XP_031083060.1/XP_031086970.1	15
BP	GO:0009141	nucleoside triphosphate metabolic process	8/358	75/3915	0.378663	0.967231	0.967231	XP_031075629.1/XP_031074933.1/XP_031077138.1/XP_031079702.1/XP_031079062.1/XP_031082731.1/XP_031081426.1/XP_031086811.1	8
BP	GO:0031139	positive regulation of conjugation with cellular fusion	8/358	75/3915	0.378663	0.967231	0.967231	XP_031075193.1/XP_031074765.1/XP_031077854.1/XP_031080598.1/XP_031079610.1/XP_031082916.1/XP_031081814.1/XP_031081869.1	8
CC	GO:0005730	nucleolus	23/343	234/3769	0.378898	0.93465	0.93465	XP_031076062.1/XP_031076000.1/XP_031075508.1/XP_031075390.1/XP_031075017.1/XP_031074765.1/XP_031074691.1/XP_031080230.1/XP_031080695.1/XP_031080757.1/XP_031080834.1/XP_031079462.1/XP_031079223.1/XP_031087645.1/XP_031087711.1/XP_031082638.1/XP_031082859.1/XP_031081510.1/XP_031081550.1/XP_031081551.1/XP_031081702.1/XP_031081705.1/XP_031086923.1	23
MF	GO:0030295	protein kinase activator activity	3/310	24/3385	0.37926	0.932611	0.932611	XP_031087419.1/XP_031081471.1/XP_031088119.1	3
BP	GO:0044270	cellular nitrogen compound catabolic process	18/358	180/3915	0.379987	0.967231	0.967231	XP_031076197.1/XP_031076062.1/XP_031075629.1/XP_031075445.1/XP_031075120.1/XP_031077854.1/XP_031077291.1/XP_031077189.1/XP_031077138.1/XP_031076955.1/XP_031080828.1/XP_031079702.1/XP_031079462.1/XP_031079233.1/XP_031079062.1/XP_031082412.1/XP_031082916.1/XP_031081700.1	18
BP	GO:0006873	cellular ion homeostasis	16/358	159/3915	0.381224	0.967231	0.967231	XP_031076028.1/XP_031075974.1/XP_031075386.1/XP_031075212.1/XP_031075086.1/XP_031077362.1/XP_031077249.1/XP_031077138.1/XP_031077076.1/XP_031079915.1/XP_031080695.1/XP_031079696.1/XP_031079299.1/XP_031089703.1/XP_031088960.1/XP_031088002.1	16
MF	GO:0043169	cation binding	21/310	212/3385	0.384415	0.932611	0.932611	XP_031076249.1/XP_031076094.1/XP_031075974.1/XP_031075846.1/XP_031075768.1/XP_031075534.1/XP_031075445.1/XP_031074933.1/XP_031077613.1/XP_031077385.1/XP_031077249.1/XP_031076726.1/XP_031080135.1/XP_031080190.1/XP_031078995.1/XP_031083630.1/XP_031083555.1/XP_031082685.1/XP_031083060.1/XP_031081977.1/XP_031086970.1	21
BP	GO:0035556	intracellular signal transduction	28/358	287/3915	0.385908	0.967231	0.967231	XP_031076249.1/XP_031076045.1/XP_031075768.1/XP_031075390.1/XP_031075320.1/XP_031075193.1/XP_031075082.1/XP_031074765.1/XP_031077816.1/XP_031077760.1/XP_031080123.1/XP_031080452.1/XP_031080695.1/XP_031080828.1/XP_031079500.1/XP_031079482.1/XP_031079334.1/XP_031083571.1/XP_031083543.1/XP_031087419.1/XP_031087597.1/XP_031087601.1/XP_031089703.1/XP_031083242.1/XP_031081814.1/XP_031081869.1/XP_031088…	28
BP	GO:0010256	endomembrane system organization	9/358	86/3915	0.387077	0.967231	0.967231	XP_031075356.1/XP_031075215.1/XP_031080222.1/XP_031080315.1/XP_031084047.1/XP_031084018.1/XP_031082585.1/XP_031081729.1/XP_031081928.1	9
BP	GO:0044092	negative regulation of molecular function	9/358	86/3915	0.387077	0.967231	0.967231	XP_031076102.1/XP_031075445.1/XP_031080123.1/XP_031080828.1/XP_031083817.1/XP_031083543.1/XP_031081529.1/XP_031086974.1/XP_031088297.1	9
BP	GO:0045333	cellular respiration	9/358	86/3915	0.387077	0.967231	0.967231	XP_031074933.1/XP_031074564.1/XP_031078049.1/XP_031080026.1/XP_031079489.1/XP_031087527.1/XP_031082860.1/XP_031081426.1/XP_031082090.1	9
BP	GO:0097237	cellular response to toxic substance	9/358	86/3915	0.387077	0.967231	0.967231	XP_031080734.1/XP_031079334.1/XP_031078792.1/XP_031078697.1/XP_031087758.1/XP_031083342.1/XP_031086937.1/XP_031088960.1/XP_031088206.1	9
BP	GO:1901361	organic cyclic compound catabolic process	20/358	202/3915	0.387343	0.967231	0.967231	XP_031076197.1/XP_031076062.1/XP_031075629.1/XP_031075445.1/XP_031075120.1/XP_031077989.1/XP_031077988.1/XP_031077854.1/XP_031077291.1/XP_031077189.1/XP_031077138.1/XP_031076955.1/XP_031080734.1/XP_031080828.1/XP_031079702.1/XP_031079462.1/XP_031079233.1/XP_031079062.1/XP_031078507.1/XP_031082412.1	20
BP	GO:0044770	cell cycle phase transition	23/358	234/3915	0.388248	0.967231	0.967231	XP_031076249.1/XP_031076045.1/XP_031075390.1/XP_031075320.1/XP_031074765.1/XP_031077760.1/XP_031080123.1/XP_031080452.1/XP_031080635.1/XP_031080695.1/XP_031080895.1/XP_031079334.1/XP_031084058.1/XP_031083571.1/XP_031087419.1/XP_031087601.1/XP_031083242.1/XP_031081814.1/XP_031081824.1/XP_031081869.1/XP_031082013.1/XP_031088031.1/XP_031088119.1	23
BP	GO:0007165	signal transduction	36/358	373/3915	0.388927	0.967231	0.967231	XP_031076249.1/XP_031076045.1/XP_031075768.1/XP_031075445.1/XP_031075390.1/XP_031075320.1/XP_031075193.1/XP_031075086.1/XP_031075082.1/XP_031074765.1/XP_031077979.1/XP_031077816.1/XP_031077760.1/XP_031079991.1/XP_031080123.1/XP_031080452.1/XP_031080695.1/XP_031080828.1/XP_031079500.1/XP_031079482.1/XP_031079364.1/XP_031079334.1/XP_031078995.1/XP_031083630.1/XP_031083571.1/XP_031083543.1/XP_031087…	36
BP	GO:0006413	translational initiation	6/358	55/3915	0.389229	0.967231	0.967231	XP_031075875.1/XP_031077900.1/XP_031077760.1/XP_031080493.1/XP_031079334.1/XP_031088194.1	6
BP	GO:0006879	cellular iron ion homeostasis	6/358	55/3915	0.389229	0.967231	0.967231	XP_031075386.1/XP_031077362.1/XP_031077249.1/XP_031079696.1/XP_031079299.1/XP_031088960.1	6
BP	GO:0051347	positive regulation of transferase activity	6/358	55/3915	0.389229	0.967231	0.967231	XP_031077200.1/XP_031083915.1/XP_031087419.1/XP_031081471.1/XP_031082013.1/XP_031088119.1	6
BP	GO:0090329	regulation of DNA-templated DNA replication	6/358	55/3915	0.389229	0.967231	0.967231	XP_031076045.1/XP_031077200.1/XP_031089054.1/XP_031080895.1/XP_031083817.1/XP_031083571.1	6
CC	GO:0031248	protein acetyltransferase complex	5/343	45/3769	0.390532	0.93465	0.93465	XP_031075138.1/XP_031074816.1/XP_031082799.1/XP_031081872.1/XP_031086838.1	5
CC	GO:1902493	acetyltransferase complex	5/343	45/3769	0.390532	0.93465	0.93465	XP_031075138.1/XP_031074816.1/XP_031082799.1/XP_031081872.1/XP_031086838.1	5
MF	GO:0090079	translation regulator activity, nucleic acid binding	6/310	55/3385	0.390617	0.932611	0.932611	XP_031075875.1/XP_031077900.1/XP_031077760.1/XP_031080493.1/XP_031083956.1/XP_031082568.1	6
BP	GO:0000122	negative regulation of transcription by RNA polymerase II	12/358	118/3915	0.393808	0.967231	0.967231	XP_031075968.1/XP_031075808.1/XP_031075779.1/XP_031077989.1/XP_031077424.1/XP_031077249.1/XP_031077076.1/XP_031080635.1/XP_031080695.1/XP_031082893.1/XP_031082916.1/XP_031083027.1	12
BP	GO:0046486	glycerolipid metabolic process	12/358	118/3915	0.393808	0.967231	0.967231	XP_031076028.1/XP_031075768.1/XP_031080857.1/XP_031079008.1/XP_031078906.1/XP_031084047.1/XP_031083915.1/XP_031082994.1/XP_031081977.1/XP_031086769.1/XP_031086989.1/XP_031087961.1	12
BP	GO:0051338	regulation of transferase activity	10/358	97/3915	0.394133	0.967231	0.967231	XP_031076102.1/XP_031077200.1/XP_031080828.1/XP_031083915.1/XP_031083630.1/XP_031083543.1/XP_031087419.1/XP_031081471.1/XP_031082013.1/XP_031088119.1	10
BP	GO:0006887	exocytosis	5/358	45/3915	0.394589	0.967231	0.967231	XP_031079951.1/XP_031080180.1/XP_031080315.1/XP_031084018.1/XP_031081814.1	5
BP	GO:0018105	peptidyl-serine phosphorylation	5/358	45/3915	0.394589	0.967231	0.967231	XP_031076045.1/XP_031075320.1/XP_031074765.1/XP_031080452.1/XP_031083630.1	5
BP	GO:0031334	positive regulation of protein-containing complex assembly	5/358	45/3915	0.394589	0.967231	0.967231	XP_031084018.1/XP_031082412.1/XP_031082939.1/XP_031081872.1/XP_031088783.1	5
BP	GO:0032392	DNA geometric change	5/358	45/3915	0.394589	0.967231	0.967231	XP_031077189.1/XP_031079022.1/XP_031083817.1/XP_031087542.1/XP_031089003.1	5
BP	GO:1902653	secondary alcohol biosynthetic process	5/358	45/3915	0.394589	0.967231	0.967231	XP_031077765.1/XP_031077586.1/XP_031080872.1/XP_031086574.1/XP_031088960.1	5
MF	GO:0046943	carboxylic acid transmembrane transporter activity	8/310	76/3385	0.394696	0.932611	0.932611	XP_031080824.1/XP_031080915.1/XP_031079319.1/XP_031084069.1/XP_031083984.1/XP_031087632.1/XP_031082027.1/XP_031086608.1	8
MF	GO:0003724	RNA helicase activity	5/310	45/3385	0.395867	0.932611	0.932611	XP_031075017.1/XP_031080153.1/XP_031080834.1/XP_031087711.1/XP_031081550.1	5
CC	GO:0072686	mitotic spindle	4/343	35/3769	0.396141	0.93465	0.93465	XP_031075390.1/XP_031074871.1/XP_031087601.1/XP_031083242.1	4
CC	GO:0000329	fungal-type vacuole membrane	17/343	172/3769	0.396809	0.93465	0.93465	XP_031075982.1/XP_031075932.1/XP_031075320.1/XP_031075212.1/XP_031077835.1/XP_031077635.1/XP_031079364.1/XP_031079319.1/XP_031083984.1/XP_031083915.1/XP_031087591.1/XP_031087632.1/XP_031082568.1/XP_031081814.1/XP_031087110.1/XP_031089001.1/XP_031087961.1	17
BP	GO:0006417	regulation of translation	13/358	129/3915	0.398898	0.967231	0.967231	XP_031075445.1/XP_031077854.1/XP_031077291.1/XP_031076955.1/XP_031080135.1/XP_031080493.1/XP_031079462.1/XP_031079334.1/XP_031079233.1/XP_031083956.1/XP_031087352.1/XP_031087729.1/XP_031082412.1	13
BP	GO:0016570	histone modification	13/358	129/3915	0.398898	0.967231	0.967231	XP_031075968.1/XP_031074816.1/XP_031077753.1/XP_031080635.1/XP_031080695.1/XP_031087533.1/XP_031089719.1/XP_031082799.1/XP_031082893.1/XP_031081529.1/XP_031081872.1/XP_031086838.1/XP_031086923.1	13
BP	GO:0009205	purine ribonucleoside triphosphate metabolic process	7/358	66/3915	0.39943	0.967231	0.967231	XP_031075629.1/XP_031074933.1/XP_031077138.1/XP_031079702.1/XP_031079062.1/XP_031081426.1/XP_031086811.1	7
BP	GO:0009968	negative regulation of signal transduction	7/358	66/3915	0.39943	0.967231	0.967231	XP_031075445.1/XP_031075320.1/XP_031075193.1/XP_031080123.1/XP_031080695.1/XP_031080828.1/XP_031083543.1	7
BP	GO:0035303	regulation of dephosphorylation	4/358	35/3915	0.399739	0.967231	0.967231	XP_031075779.1/XP_031080695.1/XP_031084047.1/XP_031087981.1	4
BP	GO:0043144	sno(s)RNA processing	4/358	35/3915	0.399739	0.967231	0.967231	XP_031076062.1/XP_031080635.1/XP_031079462.1/XP_031086923.1	4
BP	GO:2000765	regulation of cytoplasmic translation	4/358	35/3915	0.399739	0.967231	0.967231	XP_031080135.1/XP_031079334.1/XP_031083956.1/XP_031087729.1	4
CC	GO:0140535	intracellular protein-containing complex	39/343	409/3769	0.400855	0.93465	0.93465	XP_031076062.1/XP_031076000.1/XP_031075982.1/XP_031075968.1/XP_031075808.1/XP_031075198.1/XP_031075138.1/XP_031075096.1/XP_031075082.1/XP_031074932.1/XP_031074816.1/XP_031078096.1/XP_031077854.1/XP_031077753.1/XP_031077724.1/XP_031077424.1/XP_031077291.1/XP_031076955.1/XP_031089054.1/XP_031079951.1/XP_031080052.1/XP_031080120.1/XP_031080135.1/XP_031080315.1/XP_031080635.1/XP_031080895.1/XP_031079…	39
MF	GO:0016879	ligase activity, forming carbon-nitrogen bonds	4/310	35/3385	0.400887	0.932611	0.932611	XP_031077235.1/XP_031080661.1/XP_031083566.1/XP_031083026.1	4
CC	GO:0000776	kinetochore	6/343	56/3769	0.401633	0.93465	0.93465	XP_031075390.1/XP_031074871.1/XP_031080052.1/XP_031080695.1/XP_031080899.1/XP_031081739.1	6
CC	GO:0005656	nuclear pre-replicative complex	2/343	15/3769	0.402255	0.93465	0.93465	XP_031087542.1/XP_031086974.1	2
CC	GO:0005666	RNA polymerase III complex	2/343	15/3769	0.402255	0.93465	0.93465	XP_031075096.1/XP_031074932.1	2
CC	GO:0016592	mediator complex	2/343	15/3769	0.402255	0.93465	0.93465	XP_031075808.1/XP_031077424.1	2
CC	GO:0016604	nuclear body	2/343	15/3769	0.402255	0.93465	0.93465	XP_031079462.1/XP_031086923.1	2
CC	GO:0033202	DNA helicase complex	2/343	15/3769	0.402255	0.93465	0.93465	XP_031076197.1/XP_031080076.1	2
CC	GO:0036387	pre-replicative complex	2/343	15/3769	0.402255	0.93465	0.93465	XP_031087542.1/XP_031086974.1	2
CC	GO:0120105	mitotic actomyosin contractile ring, intermediate layer	2/343	15/3769	0.402255	0.93465	0.93465	XP_031075390.1/XP_031075082.1	2
MF	GO:0022857	transmembrane transporter activity	28/310	289/3385	0.403942	0.932611	0.932611	XP_031075974.1/XP_031075932.1/XP_031075517.1/XP_031075386.1/XP_031075212.1/XP_031077635.1/XP_031077505.1/XP_031077362.1/XP_031077325.1/XP_031079915.1/XP_031080824.1/XP_031080915.1/XP_031080975.1/XP_031079696.1/XP_031079489.1/XP_031079319.1/XP_031078721.1/XP_031084069.1/XP_031083984.1/XP_031087453.1/XP_031087632.1/XP_031082574.1/XP_031082027.1/XP_031086608.1/XP_031086915.1/XP_031086937.1/XP_031088…	28
BP	GO:0000183	rDNA heterochromatin formation	3/358	25/3915	0.403989	0.967231	0.967231	XP_031080635.1/XP_031087597.1/XP_031082893.1	3
BP	GO:0006633	fatty acid biosynthetic process	3/358	25/3915	0.403989	0.967231	0.967231	XP_031080038.1/XP_031079474.1/XP_031079008.1	3
BP	GO:0031023	microtubule organizing center organization	3/358	25/3915	0.403989	0.967231	0.967231	XP_031074871.1/XP_031080861.1/XP_031087601.1	3
BP	GO:0043269	regulation of ion transport	3/358	25/3915	0.403989	0.967231	0.967231	XP_031077249.1/XP_031080123.1/XP_031085409.1	3
BP	GO:0043570	maintenance of DNA repeat elements	3/358	25/3915	0.403989	0.967231	0.967231	XP_031076249.1/XP_031075215.1/XP_031083571.1	3
BP	GO:0051051	negative regulation of transport	3/358	25/3915	0.403989	0.967231	0.967231	XP_031077816.1/XP_031077249.1/XP_031085409.1	3
BP	GO:0007009	plasma membrane organization	2/358	15/3915	0.404668	0.967231	0.967231	XP_031081729.1/XP_031081928.1	2
BP	GO:0007118	budding cell apical bud growth	2/358	15/3915	0.404668	0.967231	0.967231	XP_031075082.1/XP_031081814.1	2
BP	GO:0035672	oligopeptide transmembrane transport	2/358	15/3915	0.404668	0.967231	0.967231	XP_031079696.1/XP_031086937.1	2
BP	GO:0036297	interstrand cross-link repair	2/358	15/3915	0.404668	0.967231	0.967231	XP_031075200.1/XP_031087641.1	2
BP	GO:0042743	hydrogen peroxide metabolic process	2/358	15/3915	0.404668	0.967231	0.967231	XP_031078792.1/XP_031078697.1	2
BP	GO:0042797	tRNA transcription by RNA polymerase III	2/358	15/3915	0.404668	0.967231	0.967231	XP_031075096.1/XP_031074932.1	2
BP	GO:0043966	histone H3 acetylation	2/358	15/3915	0.404668	0.967231	0.967231	XP_031074816.1/XP_031082799.1	2
BP	GO:0045833	negative regulation of lipid metabolic process	2/358	15/3915	0.404668	0.967231	0.967231	XP_031079008.1/XP_031081977.1	2
BP	GO:0046471	phosphatidylglycerol metabolic process	2/358	15/3915	0.404668	0.967231	0.967231	XP_031079008.1/XP_031081977.1	2
BP	GO:0046513	ceramide biosynthetic process	2/358	15/3915	0.404668	0.967231	0.967231	XP_031081729.1/XP_031088325.1	2
BP	GO:0046835	carbohydrate phosphorylation	2/358	15/3915	0.404668	0.967231	0.967231	XP_031077138.1/XP_031086975.1	2
BP	GO:0051156	glucose 6-phosphate metabolic process	2/358	15/3915	0.404668	0.967231	0.967231	XP_031075629.1/XP_031079702.1	2
BP	GO:0089718	amino acid import across plasma membrane	2/358	15/3915	0.404668	0.967231	0.967231	XP_031080123.1/XP_031085409.1	2
BP	GO:1903463	regulation of mitotic cell cycle DNA replication	2/358	15/3915	0.404668	0.967231	0.967231	XP_031089054.1/XP_031083571.1	2
BP	GO:1903664	regulation of asexual reproduction	2/358	15/3915	0.404668	0.967231	0.967231	XP_031080222.1/XP_031083699.1	2
BP	GO:2000779	regulation of double-strand break repair	2/358	15/3915	0.404668	0.967231	0.967231	XP_031087641.1/XP_031088119.1	2
MF	GO:0019208	phosphatase regulator activity	3/310	25/3385	0.404981	0.932611	0.932611	XP_031075779.1/XP_031076958.1/XP_031087981.1	3
MF	GO:0019209	kinase activator activity	3/310	25/3385	0.404981	0.932611	0.932611	XP_031087419.1/XP_031081471.1/XP_031088119.1	3
MF	GO:0046915	transition metal ion transmembrane transporter activity	3/310	25/3385	0.404981	0.932611	0.932611	XP_031079915.1/XP_031080975.1/XP_031078721.1	3
MF	GO:0016538	cyclin-dependent protein serine/threonine kinase regulator activity	2/310	15/3385	0.405459	0.932611	0.932611	XP_031076102.1/XP_031081471.1	2
MF	GO:0016638	oxidoreductase activity, acting on the CH-NH2 group of donors	2/310	15/3385	0.405459	0.932611	0.932611	XP_031080117.1/XP_031083127.1	2
BP	GO:0009066	aspartate family amino acid metabolic process	6/358	56/3915	0.406174	0.967231	0.967231	XP_031075268.1/XP_031075183.1/XP_031077592.1/XP_031077257.1/XP_031083566.1/XP_031086811.1	6
BP	GO:0055072	iron ion homeostasis	6/358	56/3915	0.406174	0.967231	0.967231	XP_031075386.1/XP_031077362.1/XP_031077249.1/XP_031079696.1/XP_031079299.1/XP_031088960.1	6
BP	GO:1902532	negative regulation of intracellular signal transduction	6/358	56/3915	0.406174	0.967231	0.967231	XP_031075320.1/XP_031075193.1/XP_031080123.1/XP_031080695.1/XP_031080828.1/XP_031083543.1	6
CC	GO:0098852	lytic vacuole membrane	17/343	173/3769	0.406465	0.93754	0.93754	XP_031075982.1/XP_031075932.1/XP_031075320.1/XP_031075212.1/XP_031077835.1/XP_031077635.1/XP_031079364.1/XP_031079319.1/XP_031083984.1/XP_031083915.1/XP_031087591.1/XP_031087632.1/XP_031082568.1/XP_031081814.1/XP_031087110.1/XP_031089001.1/XP_031087961.1	17
BP	GO:0006520	cellular amino acid metabolic process	24/358	247/3915	0.407403	0.967231	0.967231	XP_031075775.1/XP_031075268.1/XP_031075183.1/XP_031075015.1/XP_031074995.1/XP_031074813.1/XP_031078049.1/XP_031077592.1/XP_031077257.1/XP_031077235.1/XP_031076636.1/XP_031079936.1/XP_031080117.1/XP_031080639.1/XP_031080661.1/XP_031079500.1/XP_031079062.1/XP_031083772.1/XP_031083566.1/XP_031082916.1/XP_031083027.1/XP_031081700.1/XP_031081710.1/XP_031086811.1	24
BP	GO:0046474	glycerophospholipid biosynthetic process	8/358	77/3915	0.407518	0.967231	0.967231	XP_031075768.1/XP_031080857.1/XP_031079008.1/XP_031078906.1/XP_031083915.1/XP_031082994.1/XP_031081977.1/XP_031087961.1	8
BP	GO:0046916	cellular transition metal ion homeostasis	8/358	77/3915	0.407518	0.967231	0.967231	XP_031075386.1/XP_031077362.1/XP_031077249.1/XP_031077076.1/XP_031079915.1/XP_031079696.1/XP_031079299.1/XP_031088960.1	8
MF	GO:0004518	nuclease activity	8/310	77/3385	0.409176	0.932611	0.932611	XP_031076249.1/XP_031075200.1/XP_031077189.1/XP_031080826.1/XP_031079462.1/XP_031082731.1/XP_031082064.1/XP_031088119.1	8
CC	GO:0005657	replication fork	7/343	67/3769	0.409983	0.938802	0.938802	XP_031077200.1/XP_031077189.1/XP_031083571.1/XP_031087411.1/XP_031087419.1/XP_031087542.1/XP_031086974.1	7
BP	GO:0006457	protein folding	9/358	88/3915	0.414149	0.967231	0.967231	XP_031077724.1/XP_031077574.1/XP_031077563.1/XP_031077522.1/XP_031077216.1/XP_031076666.1/XP_031080803.1/XP_031079154.1/XP_031078995.1	9
BP	GO:0009123	nucleoside monophosphate metabolic process	9/358	88/3915	0.414149	0.967231	0.967231	XP_031075629.1/XP_031074933.1/XP_031077656.1/XP_031077138.1/XP_031079702.1/XP_031079062.1/XP_031083026.1/XP_031081426.1/XP_031086811.1	9
BP	GO:0080135	regulation of cellular response to stress	9/358	88/3915	0.414149	0.967231	0.967231	XP_031075445.1/XP_031077753.1/XP_031077249.1/XP_031080635.1/XP_031080828.1/XP_031079334.1/XP_031083817.1/XP_031087641.1/XP_031088119.1	9
BP	GO:0006629	lipid metabolic process	31/358	323/3915	0.414401	0.967231	0.967231	XP_031076323.1/XP_031076028.1/XP_031075967.1/XP_031075768.1/XP_031075320.1/XP_031074564.1/XP_031077765.1/XP_031077731.1/XP_031077586.1/XP_031077325.1/XP_031080038.1/XP_031080857.1/XP_031080872.1/XP_031079482.1/XP_031079474.1/XP_031079008.1/XP_031078906.1/XP_031084047.1/XP_031083915.1/XP_031083630.1/XP_031087533.1/XP_031082994.1/XP_031081729.1/XP_031081977.1/XP_031086769.1/XP_031086989.1/XP_031088…	31
BP	GO:0051247	positive regulation of protein metabolic process	17/358	173/3915	0.414537	0.967231	0.967231	XP_031075968.1/XP_031075445.1/XP_031075082.1/XP_031077753.1/XP_031077200.1/XP_031080135.1/XP_031080493.1/XP_031080635.1/XP_031080695.1/XP_031083956.1/XP_031087352.1/XP_031087419.1/XP_031087729.1/XP_031081471.1/XP_031081824.1/XP_031082013.1/XP_031088119.1	17
MF	GO:0008186	ATP-dependent activity, acting on RNA	5/310	46/3385	0.4147	0.932611	0.932611	XP_031075017.1/XP_031080153.1/XP_031080834.1/XP_031087711.1/XP_031081550.1	5
BP	GO:0023057	negative regulation of signaling	7/358	67/3915	0.414964	0.967231	0.967231	XP_031075445.1/XP_031075320.1/XP_031075193.1/XP_031080123.1/XP_031080695.1/XP_031080828.1/XP_031083543.1	7
CC	GO:0009277	fungal-type cell wall	8/343	78/3769	0.416562	0.947005	0.947005	XP_031075883.1/XP_031078096.1/XP_031080296.1/XP_031079294.1/XP_031078792.1/XP_031083732.1/XP_031083572.1/XP_031082568.1	8
BP	GO:0034655	nucleobase-containing compound catabolic process	15/358	152/3915	0.417854	0.967231	0.967231	XP_031076197.1/XP_031076062.1/XP_031075629.1/XP_031075445.1/XP_031075120.1/XP_031077854.1/XP_031077291.1/XP_031077189.1/XP_031077138.1/XP_031076955.1/XP_031080828.1/XP_031079702.1/XP_031079462.1/XP_031079233.1/XP_031082412.1	15
MF	GO:0036094	small molecule binding	36/310	377/3385	0.419243	0.932611	0.932611	XP_031076045.1/XP_031075974.1/XP_031075629.1/XP_031075320.1/XP_031075268.1/XP_031075017.1/XP_031075015.1/XP_031074995.1/XP_031074813.1/XP_031074765.1/XP_031077889.1/XP_031077724.1/XP_031077603.1/XP_031077189.1/XP_031077138.1/XP_031076636.1/XP_031080639.1/XP_031080834.1/XP_031080861.1/XP_031080872.1/XP_031079334.1/XP_031079044.1/XP_031078995.1/XP_031084212.1/XP_031083630.1/XP_031083543.1/XP_031087…	36
BP	GO:0006271	DNA strand elongation involved in DNA replication	4/358	36/3915	0.421111	0.967231	0.967231	XP_031077200.1/XP_031077189.1/XP_031087542.1/XP_031086974.1	4
BP	GO:0034968	histone lysine methylation	4/358	36/3915	0.421111	0.967231	0.967231	XP_031075968.1/XP_031077753.1/XP_031080635.1/XP_031081529.1	4
BP	GO:0046890	regulation of lipid biosynthetic process	4/358	36/3915	0.421111	0.967231	0.967231	XP_031075320.1/XP_031079008.1/XP_031083915.1/XP_031081977.1	4
BP	GO:0055076	transition metal ion homeostasis	8/358	78/3915	0.421949	0.967231	0.967231	XP_031075386.1/XP_031077362.1/XP_031077249.1/XP_031077076.1/XP_031079915.1/XP_031079696.1/XP_031079299.1/XP_031088960.1	8
BP	GO:0006275	regulation of DNA replication	6/358	57/3915	0.423082	0.967231	0.967231	XP_031076045.1/XP_031077200.1/XP_031089054.1/XP_031080895.1/XP_031083817.1/XP_031083571.1	6
BP	GO:0065009	regulation of molecular function	33/358	346/3915	0.424903	0.967231	0.967231	XP_031076102.1/XP_031075779.1/XP_031075445.1/XP_031075417.1/XP_031075193.1/XP_031075082.1/XP_031074765.1/XP_031077816.1/XP_031077574.1/XP_031077563.1/XP_031077216.1/XP_031077200.1/XP_031076958.1/XP_031080123.1/XP_031080828.1/XP_031079517.1/XP_031079022.1/XP_031083915.1/XP_031083817.1/XP_031083630.1/XP_031083543.1/XP_031087419.1/XP_031083242.1/XP_031081471.1/XP_031081529.1/XP_031081869.1/XP_031081…	33
BP	GO:0043254	regulation of protein-containing complex assembly	9/358	89/3915	0.427687	0.967231	0.967231	XP_031076197.1/XP_031075968.1/XP_031084018.1/XP_031087591.1/XP_031082412.1/XP_031082939.1/XP_031081872.1/XP_031086970.1/XP_031088783.1	9
BP	GO:0030435	sporulation resulting in formation of a cellular spore	12/358	121/3915	0.428674	0.967231	0.967231	XP_031076272.1/XP_031076249.1/XP_031075320.1/XP_031077613.1/XP_031077288.1/XP_031080315.1/XP_031080695.1/XP_031083732.1/XP_031082978.1/XP_031081891.1/XP_031081977.1/XP_031088783.1	12
BP	GO:0006896	Golgi to vacuole transport	3/358	26/3915	0.429352	0.967231	0.967231	XP_031079142.1/XP_031081977.1/XP_031087019.1	3
BP	GO:0032005	signal transduction involved in positive regulation of conjugation with cellular fusion	3/358	26/3915	0.429352	0.967231	0.967231	XP_031075193.1/XP_031081814.1/XP_031081869.1	3
BP	GO:0043244	regulation of protein-containing complex disassembly	3/358	26/3915	0.429352	0.967231	0.967231	XP_031075445.1/XP_031077138.1/XP_031080135.1	3
BP	GO:0045991	carbon catabolite activation of transcription	3/358	26/3915	0.429352	0.967231	0.967231	XP_031077988.1/XP_031076726.1/XP_031083555.1	3
BP	GO:0140718	facultative heterochromatin formation	3/358	26/3915	0.429352	0.967231	0.967231	XP_031080635.1/XP_031087597.1/XP_031082893.1	3
BP	GO:2000104	negative regulation of DNA-templated DNA replication	3/358	26/3915	0.429352	0.967231	0.967231	XP_031076045.1/XP_031083817.1/XP_031083571.1	3
MF	GO:0000149	SNARE binding	3/310	26/3385	0.430384	0.932611	0.932611	XP_031079951.1/XP_031084018.1/XP_031087019.1	3
MF	GO:0005319	lipid transporter activity	3/310	26/3385	0.430384	0.932611	0.932611	XP_031080598.1/XP_031079008.1/XP_031081977.1	3
MF	GO:0016298	lipase activity	3/310	26/3385	0.430384	0.932611	0.932611	XP_031075057.1/XP_031079179.1/XP_031078906.1	3
MF	GO:0042887	amide transmembrane transporter activity	3/310	26/3385	0.430384	0.932611	0.932611	XP_031083984.1/XP_031082574.1/XP_031086937.1	3
BP	GO:0009199	ribonucleoside triphosphate metabolic process	7/358	68/3915	0.430469	0.967231	0.967231	XP_031075629.1/XP_031074933.1/XP_031077138.1/XP_031079702.1/XP_031079062.1/XP_031081426.1/XP_031086811.1	7
BP	GO:0042180	cellular ketone metabolic process	7/358	68/3915	0.430469	0.967231	0.967231	XP_031076272.1/XP_031075541.1/XP_031079008.1/XP_031078776.1/XP_031083555.1/XP_031082916.1/XP_031081891.1	7
BP	GO:0098660	inorganic ion transmembrane transport	16/358	164/3915	0.431241	0.967231	0.967231	XP_031075974.1/XP_031075517.1/XP_031075386.1/XP_031075212.1/XP_031077635.1/XP_031077362.1/XP_031077325.1/XP_031079915.1/XP_031080975.1/XP_031079696.1/XP_031079299.1/XP_031078721.1/XP_031082574.1/XP_031082027.1/XP_031088002.1/XP_031084712.1	16
BP	GO:0008610	lipid biosynthetic process	20/358	207/3915	0.432063	0.967231	0.967231	XP_031075768.1/XP_031075320.1/XP_031077765.1/XP_031077586.1/XP_031080038.1/XP_031080857.1/XP_031080872.1/XP_031079482.1/XP_031079474.1/XP_031079008.1/XP_031078906.1/XP_031084047.1/XP_031083915.1/XP_031082994.1/XP_031081729.1/XP_031081977.1/XP_031086769.1/XP_031088960.1/XP_031087961.1/XP_031088325.1	20
BP	GO:0018209	peptidyl-serine modification	5/358	47/3915	0.432082	0.967231	0.967231	XP_031076045.1/XP_031075320.1/XP_031074765.1/XP_031080452.1/XP_031083630.1	5
BP	GO:1901606	alpha-amino acid catabolic process	5/358	47/3915	0.432082	0.967231	0.967231	XP_031074995.1/XP_031079062.1/XP_031083027.1/XP_031081710.1/XP_031086811.1	5
CC	GO:0031410	cytoplasmic vesicle	20/343	208/3769	0.432087	0.947994	0.947994	XP_031076272.1/XP_031075385.1/XP_031077596.1/XP_031077362.1/XP_031077288.1/XP_031079951.1/XP_031080222.1/XP_031080695.1/XP_031080871.1/XP_031079696.1/XP_031079142.1/XP_031079008.1/XP_031084018.1/XP_031087591.1/XP_031081814.1/XP_031081891.1/XP_031086970.1/XP_031087019.1/XP_031089001.1/XP_031085409.1	20
CC	GO:0097708	intracellular vesicle	20/343	208/3769	0.432087	0.947994	0.947994	XP_031076272.1/XP_031075385.1/XP_031077596.1/XP_031077362.1/XP_031077288.1/XP_031079951.1/XP_031080222.1/XP_031080695.1/XP_031080871.1/XP_031079696.1/XP_031079142.1/XP_031079008.1/XP_031084018.1/XP_031087591.1/XP_031081814.1/XP_031081891.1/XP_031086970.1/XP_031087019.1/XP_031089001.1/XP_031085409.1	20
BP	GO:0097435	supramolecular fiber organization	10/358	100/3915	0.432521	0.967231	0.967231	XP_031075082.1/XP_031074938.1/XP_031074871.1/XP_031077613.1/XP_031077574.1/XP_031076958.1/XP_031080861.1/XP_031080899.1/XP_031082939.1/XP_031088783.1	10
BP	GO:0031399	regulation of protein modification process	17/358	175/3915	0.433999	0.967231	0.967231	XP_031076102.1/XP_031075968.1/XP_031075779.1/XP_031075082.1/XP_031077753.1/XP_031077200.1/XP_031080635.1/XP_031080695.1/XP_031080828.1/XP_031083543.1/XP_031087419.1/XP_031087641.1/XP_031081471.1/XP_031081529.1/XP_031082013.1/XP_031087981.1/XP_031088119.1	17
BP	GO:1901990	regulation of mitotic cell cycle phase transition	17/358	175/3915	0.433999	0.967231	0.967231	XP_031076045.1/XP_031075390.1/XP_031075320.1/XP_031074765.1/XP_031077760.1/XP_031080123.1/XP_031080695.1/XP_031079334.1/XP_031083571.1/XP_031087419.1/XP_031087601.1/XP_031083242.1/XP_031081814.1/XP_031081824.1/XP_031081869.1/XP_031082013.1/XP_031088119.1	17
BP	GO:0006812	cation transport	21/358	218/3915	0.4343	0.967231	0.967231	XP_031075974.1/XP_031075386.1/XP_031075212.1/XP_031077635.1/XP_031077325.1/XP_031077249.1/XP_031079915.1/XP_031080123.1/XP_031080975.1/XP_031079696.1/XP_031079489.1/XP_031079319.1/XP_031079299.1/XP_031078721.1/XP_031087632.1/XP_031082574.1/XP_031082027.1/XP_031087110.1/XP_031088002.1/XP_031084712.1/XP_031085409.1	21
CC	GO:0000328	fungal-type vacuole lumen	2/343	16/3769	0.434997	0.947994	0.947994	XP_031080803.1/XP_031088333.1	2
CC	GO:0019005	SCF ubiquitin ligase complex	2/343	16/3769	0.434997	0.947994	0.947994	XP_031075198.1/XP_031080895.1	2
CC	GO:0032541	cortical endoplasmic reticulum	2/343	16/3769	0.434997	0.947994	0.947994	XP_031084047.1/XP_031088871.1	2
CC	GO:0036452	ESCRT complex	2/343	16/3769	0.434997	0.947994	0.947994	XP_031076272.1/XP_031081891.1	2
BP	GO:0006979	response to oxidative stress	14/358	143/3915	0.435636	0.967231	0.967231	XP_031075629.1/XP_031075320.1/XP_031074995.1/XP_031074849.1/XP_031074765.1/XP_031080452.1/XP_031079334.1/XP_031078792.1/XP_031078697.1/XP_031083817.1/XP_031083342.1/XP_031081739.1/XP_031086937.1/XP_031088960.1	14
BP	GO:0006875	cellular metal ion homeostasis	11/358	111/3915	0.436675	0.967231	0.967231	XP_031075386.1/XP_031075212.1/XP_031075086.1/XP_031077362.1/XP_031077249.1/XP_031077076.1/XP_031079915.1/XP_031079696.1/XP_031079299.1/XP_031088960.1/XP_031088002.1	11
BP	GO:0009304	tRNA transcription	2/358	16/3915	0.437502	0.967231	0.967231	XP_031075096.1/XP_031074932.1	2
BP	GO:0030838	positive regulation of actin filament polymerization	2/358	16/3915	0.437502	0.967231	0.967231	XP_031082939.1/XP_031088783.1	2
BP	GO:0034397	telomere localization	2/358	16/3915	0.437502	0.967231	0.967231	XP_031075968.1/XP_031075215.1	2
BP	GO:0051239	regulation of multicellular organismal process	2/358	16/3915	0.437502	0.967231	0.967231	XP_031077816.1/XP_031080222.1	2
MF	GO:0005342	organic acid transmembrane transporter activity	8/310	79/3385	0.438099	0.932611	0.932611	XP_031080824.1/XP_031080915.1/XP_031079319.1/XP_031084069.1/XP_031083984.1/XP_031087632.1/XP_031082027.1/XP_031086608.1	8
MF	GO:0016893	endonuclease activity, active with either ribo- or deoxyribonucleic acids and producing 5'-phosphomonoesters	2/310	16/3385	0.438333	0.932611	0.932611	XP_031077189.1/XP_031080826.1	2
BP	GO:0032104	regulation of response to extracellular stimulus	6/358	58/3915	0.439926	0.967231	0.967231	XP_031075320.1/XP_031077249.1/XP_031080828.1/XP_031079334.1/XP_031083543.1/XP_031082916.1	6
BP	GO:0032107	regulation of response to nutrient levels	6/358	58/3915	0.439926	0.967231	0.967231	XP_031075320.1/XP_031077249.1/XP_031080828.1/XP_031079334.1/XP_031083543.1/XP_031082916.1	6
BP	GO:0007264	small GTPase mediated signal transduction	9/358	90/3915	0.441205	0.967231	0.967231	XP_031075390.1/XP_031075193.1/XP_031075082.1/XP_031077816.1/XP_031080123.1/XP_031083543.1/XP_031083242.1/XP_031081814.1/XP_031081869.1	9
BP	GO:0050801	ion homeostasis	16/358	165/3915	0.441281	0.967231	0.967231	XP_031076028.1/XP_031075974.1/XP_031075386.1/XP_031075212.1/XP_031075086.1/XP_031077362.1/XP_031077249.1/XP_031077138.1/XP_031077076.1/XP_031079915.1/XP_031080695.1/XP_031079696.1/XP_031079299.1/XP_031089703.1/XP_031088960.1/XP_031088002.1	16
MF	GO:0046873	metal ion transmembrane transporter activity	6/310	58/3385	0.441439	0.932611	0.932611	XP_031075212.1/XP_031077635.1/XP_031079915.1/XP_031080975.1/XP_031078721.1/XP_031088002.1	6
BP	GO:0032968	positive regulation of transcription elongation by RNA polymerase II	4/358	37/3915	0.442297	0.967231	0.967231	XP_031077854.1/XP_031077753.1/XP_031076955.1/XP_031080635.1	4
BP	GO:0051123	RNA polymerase II preinitiation complex assembly	4/358	37/3915	0.442297	0.967231	0.967231	XP_031082859.1/XP_031081872.1/XP_031086838.1/XP_031087981.1	4
BP	GO:0050790	regulation of catalytic activity	26/358	273/3915	0.443592	0.967231	0.967231	XP_031076102.1/XP_031075779.1/XP_031075193.1/XP_031075082.1/XP_031077816.1/XP_031077574.1/XP_031077563.1/XP_031077216.1/XP_031077200.1/XP_031076958.1/XP_031080123.1/XP_031080828.1/XP_031079517.1/XP_031079022.1/XP_031083915.1/XP_031083630.1/XP_031083543.1/XP_031087419.1/XP_031081471.1/XP_031081529.1/XP_031081872.1/XP_031082013.1/XP_031086970.1/XP_031086974.1/XP_031087981.1/XP_031088119.1	26
BP	GO:0015849	organic acid transport	10/358	101/3915	0.445301	0.967231	0.967231	XP_031080123.1/XP_031080824.1/XP_031080915.1/XP_031079319.1/XP_031084069.1/XP_031083984.1/XP_031087632.1/XP_031082027.1/XP_031086608.1/XP_031085409.1	10
BP	GO:0009060	aerobic respiration	7/358	69/3915	0.445923	0.967231	0.967231	XP_031074933.1/XP_031074564.1/XP_031078049.1/XP_031079489.1/XP_031087527.1/XP_031081426.1/XP_031082090.1	7
BP	GO:0009144	purine nucleoside triphosphate metabolic process	7/358	69/3915	0.445923	0.967231	0.967231	XP_031075629.1/XP_031074933.1/XP_031077138.1/XP_031079702.1/XP_031079062.1/XP_031081426.1/XP_031086811.1	7
BP	GO:0010570	regulation of filamentous growth	7/358	69/3915	0.445923	0.967231	0.967231	XP_031076272.1/XP_031075541.1/XP_031075320.1/XP_031077765.1/XP_031083543.1/XP_031087533.1/XP_031081814.1	7
BP	GO:0010608	post-transcriptional regulation of gene expression	14/358	144/3915	0.446376	0.967231	0.967231	XP_031075445.1/XP_031077854.1/XP_031077291.1/XP_031076955.1/XP_031080135.1/XP_031080493.1/XP_031079462.1/XP_031079334.1/XP_031079233.1/XP_031083956.1/XP_031087352.1/XP_031087729.1/XP_031082412.1/XP_031081529.1	14
BP	GO:0098771	inorganic ion homeostasis	14/358	144/3915	0.446376	0.967231	0.967231	XP_031076028.1/XP_031075974.1/XP_031075386.1/XP_031075212.1/XP_031075086.1/XP_031077362.1/XP_031077249.1/XP_031077138.1/XP_031077076.1/XP_031079915.1/XP_031079696.1/XP_031079299.1/XP_031088960.1/XP_031088002.1	14
CC	GO:0031982	vesicle	20/343	210/3769	0.449983	0.958519	0.958519	XP_031076272.1/XP_031075385.1/XP_031077596.1/XP_031077362.1/XP_031077288.1/XP_031079951.1/XP_031080222.1/XP_031080695.1/XP_031080871.1/XP_031079696.1/XP_031079142.1/XP_031079008.1/XP_031084018.1/XP_031087591.1/XP_031081814.1/XP_031081891.1/XP_031086970.1/XP_031087019.1/XP_031089001.1/XP_031085409.1	20
BP	GO:0006109	regulation of carbohydrate metabolic process	5/358	48/3915	0.450659	0.967231	0.967231	XP_031075779.1/XP_031080120.1/XP_031080695.1/XP_031083555.1/XP_031081814.1	5
BP	GO:0045143	homologous chromosome segregation	5/358	48/3915	0.450659	0.967231	0.967231	XP_031075968.1/XP_031075215.1/XP_031074938.1/XP_031080861.1/XP_031087641.1	5
BP	GO:0098739	import across plasma membrane	5/358	48/3915	0.450659	0.967231	0.967231	XP_031080123.1/XP_031080975.1/XP_031079299.1/XP_031078721.1/XP_031085409.1	5
CC	GO:0030120	vesicle coat	3/343	27/3769	0.451107	0.958519	0.958519	XP_031077596.1/XP_031079142.1/XP_031086970.1	3
CC	GO:0030133	transport vesicle	3/343	27/3769	0.451107	0.958519	0.958519	XP_031079142.1/XP_031081814.1/XP_031086970.1	3
CC	GO:0005934	cellular bud tip	6/343	59/3769	0.45196	0.958519	0.958519	XP_031075082.1/XP_031077307.1/XP_031080315.1/XP_031084047.1/XP_031083015.1/XP_031081814.1	6
BP	GO:0010557	positive regulation of macromolecule biosynthetic process	27/358	285/3915	0.452925	0.967231	0.967231	XP_031075808.1/XP_031075534.1/XP_031075320.1/XP_031074816.1/XP_031074691.1/XP_031077988.1/XP_031077854.1/XP_031077810.1/XP_031077753.1/XP_031077424.1/XP_031077249.1/XP_031077200.1/XP_031076955.1/XP_031076726.1/XP_031080493.1/XP_031080635.1/XP_031084058.1/XP_031083956.1/XP_031083555.1/XP_031087352.1/XP_031087729.1/XP_031082799.1/XP_031082893.1/XP_031082916.1/XP_031081872.1/XP_031088031.1/XP_031088…	27
BP	GO:0006094	gluconeogenesis	3/358	27/3915	0.454321	0.967231	0.967231	XP_031080120.1/XP_031079702.1/XP_031083555.1	3
BP	GO:0008156	negative regulation of DNA replication	3/358	27/3915	0.454321	0.967231	0.967231	XP_031076045.1/XP_031083817.1/XP_031083571.1	3
BP	GO:0009062	fatty acid catabolic process	3/358	27/3915	0.454321	0.967231	0.967231	XP_031076323.1/XP_031074564.1/XP_031086048.1	3
BP	GO:0019319	hexose biosynthetic process	3/358	27/3915	0.454321	0.967231	0.967231	XP_031080120.1/XP_031079702.1/XP_031083555.1	3
BP	GO:0032878	regulation of establishment or maintenance of cell polarity	3/358	27/3915	0.454321	0.967231	0.967231	XP_031080695.1/XP_031083630.1/XP_031081814.1	3
BP	GO:0051205	protein insertion into membrane	3/358	27/3915	0.454321	0.967231	0.967231	XP_031087564.1/XP_031083105.1/XP_031081426.1	3
MF	GO:0008408	3'-5' exonuclease activity	3/310	27/3385	0.455388	0.932611	0.932611	XP_031076249.1/XP_031079462.1/XP_031088119.1	3
MF	GO:0015179	L-amino acid transmembrane transporter activity	3/310	27/3385	0.455388	0.932611	0.932611	XP_031079319.1/XP_031087632.1/XP_031082027.1	3
CC	GO:0030687	preribosome, large subunit precursor	7/343	70/3769	0.456166	0.960989	0.960989	XP_031077225.1/XP_031080834.1/XP_031079223.1/XP_031079174.1/XP_031087645.1/XP_031087711.1/XP_031081510.1	7
BP	GO:0009063	cellular amino acid catabolic process	6/358	59/3915	0.456676	0.967231	0.967231	XP_031074995.1/XP_031079062.1/XP_031083027.1/XP_031081700.1/XP_031081710.1/XP_031086811.1	6
MF	GO:0022890	inorganic cation transmembrane transporter activity	11/310	113/3385	0.463091	0.932611	0.932611	XP_031075974.1/XP_031075212.1/XP_031077635.1/XP_031077325.1/XP_031079915.1/XP_031080975.1/XP_031079696.1/XP_031078721.1/XP_031082574.1/XP_031082027.1/XP_031088002.1	11
BP	GO:0071310	cellular response to organic substance	17/358	178/3915	0.463197	0.967231	0.967231	XP_031075320.1/XP_031077854.1/XP_031077138.1/XP_031080117.1/XP_031080598.1/XP_031080828.1/XP_031079334.1/XP_031078995.1/XP_031083630.1/XP_031083543.1/XP_031082513.1/XP_031082916.1/XP_031081529.1/XP_031081814.1/XP_031081869.1/XP_031086811.1/XP_031088318.1	17
BP	GO:0032258	cytoplasm to vacuole transport by the Cvt pathway	4/358	38/3915	0.463249	0.967231	0.967231	XP_031075356.1/XP_031079045.1/XP_031088783.1/XP_031089001.1	4
BP	GO:0034614	cellular response to reactive oxygen species	4/358	38/3915	0.463249	0.967231	0.967231	XP_031079334.1/XP_031078792.1/XP_031086937.1/XP_031088960.1	4
BP	GO:0090033	positive regulation of filamentous growth	4/358	38/3915	0.463249	0.967231	0.967231	XP_031076272.1/XP_031075541.1/XP_031075320.1/XP_031081814.1	4
BP	GO:1900430	positive regulation of filamentous growth of a population of unicellular organisms	4/358	38/3915	0.463249	0.967231	0.967231	XP_031076272.1/XP_031075541.1/XP_031075320.1/XP_031081814.1	4
BP	GO:1903008	organelle disassembly	4/358	38/3915	0.463249	0.967231	0.967231	XP_031075390.1/XP_031074871.1/XP_031076958.1/XP_031089001.1	4
BP	GO:0019439	aromatic compound catabolic process	18/358	189/3915	0.464909	0.967231	0.967231	XP_031076197.1/XP_031076062.1/XP_031075629.1/XP_031075445.1/XP_031075120.1/XP_031077854.1/XP_031077291.1/XP_031077189.1/XP_031077138.1/XP_031076955.1/XP_031080734.1/XP_031080828.1/XP_031079702.1/XP_031079462.1/XP_031079233.1/XP_031079062.1/XP_031078507.1/XP_031082412.1	18
BP	GO:0006354	DNA-templated transcription elongation	8/358	81/3915	0.465027	0.967231	0.967231	XP_031077854.1/XP_031077810.1/XP_031077753.1/XP_031077291.1/XP_031076955.1/XP_031080635.1/XP_031081705.1/XP_031087981.1	8
BP	GO:0090150	establishment of protein localization to membrane	8/358	81/3915	0.465027	0.967231	0.967231	XP_031077816.1/XP_031080190.1/XP_031080315.1/XP_031079008.1/XP_031087564.1/XP_031083105.1/XP_031081426.1/XP_031081977.1	8
BP	GO:1903311	regulation of mRNA metabolic process	8/358	81/3915	0.465027	0.967231	0.967231	XP_031075445.1/XP_031077854.1/XP_031077291.1/XP_031076955.1/XP_031079462.1/XP_031079233.1/XP_031089703.1/XP_031082412.1	8
BP	GO:0023052	signaling	39/358	417/3915	0.465979	0.967231	0.967231	XP_031076249.1/XP_031076045.1/XP_031075779.1/XP_031075768.1/XP_031075445.1/XP_031075390.1/XP_031075320.1/XP_031075193.1/XP_031075086.1/XP_031075082.1/XP_031074959.1/XP_031074765.1/XP_031077979.1/XP_031077816.1/XP_031077760.1/XP_031079991.1/XP_031080123.1/XP_031080452.1/XP_031080695.1/XP_031080828.1/XP_031079500.1/XP_031079482.1/XP_031079364.1/XP_031079334.1/XP_031078995.1/XP_031083630.1/XP_031083…	39
CC	GO:0071782	endoplasmic reticulum tubular network	2/343	17/3769	0.466749	0.964699	0.964699	XP_031084047.1/XP_031088871.1	2
CC	GO:0005783	endoplasmic reticulum	43/343	463/3769	0.467894	0.964699	0.964699	XP_031076102.1/XP_031075982.1/XP_031075932.1/XP_031075883.1/XP_031075385.1/XP_031077765.1/XP_031077731.1/XP_031077635.1/XP_031077506.1/XP_031077505.1/XP_031077362.1/XP_031076666.1/XP_031079915.1/XP_031080038.1/XP_031080296.1/XP_031080598.1/XP_031080605.1/XP_031080857.1/XP_031080872.1/XP_031079610.1/XP_031079482.1/XP_031078995.1/XP_031078906.1/XP_031078721.1/XP_031084047.1/XP_031084018.1/XP_031083…	43
BP	GO:0061024	membrane organization	20/358	211/3915	0.46798	0.967231	0.967231	XP_031075982.1/XP_031075215.1/XP_031077288.1/XP_031080315.1/XP_031080598.1/XP_031079517.1/XP_031079489.1/XP_031079008.1/XP_031084047.1/XP_031084018.1/XP_031087564.1/XP_031087591.1/XP_031087712.1/XP_031082585.1/XP_031083105.1/XP_031081426.1/XP_031081729.1/XP_031081928.1/XP_031081977.1/XP_031086970.1	20
BP	GO:0046942	carboxylic acid transport	9/358	92/3915	0.468122	0.967231	0.967231	XP_031080123.1/XP_031080824.1/XP_031080915.1/XP_031079319.1/XP_031084069.1/XP_031083984.1/XP_031087632.1/XP_031082027.1/XP_031086608.1	9
BP	GO:0009156	ribonucleoside monophosphate biosynthetic process	5/358	49/3915	0.469074	0.967231	0.967231	XP_031075629.1/XP_031077656.1/XP_031077138.1/XP_031079702.1/XP_031083026.1	5
BP	GO:0006267	pre-replicative complex assembly involved in nuclear cell cycle DNA replication	2/358	17/3915	0.469326	0.967231	0.967231	XP_031087542.1/XP_031086974.1	2
BP	GO:0006635	fatty acid beta-oxidation	2/358	17/3915	0.469326	0.967231	0.967231	XP_031076323.1/XP_031086048.1	2
BP	GO:0009065	glutamine family amino acid catabolic process	2/358	17/3915	0.469326	0.967231	0.967231	XP_031074995.1/XP_031081710.1	2
BP	GO:0009310	amine catabolic process	2/358	17/3915	0.469326	0.967231	0.967231	XP_031079062.1/XP_031078681.1	2
BP	GO:0015695	organic cation transport	2/358	17/3915	0.469326	0.967231	0.967231	XP_031077325.1/XP_031082027.1	2
BP	GO:0031145	anaphase-promoting complex-dependent catabolic process	2/358	17/3915	0.469326	0.967231	0.967231	XP_031081824.1/XP_031082013.1	2
BP	GO:0034314	Arp2/3 complex-mediated actin nucleation	2/358	17/3915	0.469326	0.967231	0.967231	XP_031082939.1/XP_031088783.1	2
BP	GO:0034406	cell wall beta-glucan metabolic process	2/358	17/3915	0.469326	0.967231	0.967231	XP_031078995.1/XP_031083732.1	2
BP	GO:0034410	cell wall beta-glucan biosynthetic process	2/358	17/3915	0.469326	0.967231	0.967231	XP_031078995.1/XP_031083732.1	2
BP	GO:0034765	regulation of ion transmembrane transport	2/358	17/3915	0.469326	0.967231	0.967231	XP_031080123.1/XP_031085409.1	2
BP	GO:0036388	pre-replicative complex assembly	2/358	17/3915	0.469326	0.967231	0.967231	XP_031087542.1/XP_031086974.1	2
BP	GO:0042278	purine nucleoside metabolic process	2/358	17/3915	0.469326	0.967231	0.967231	XP_031082436.1/XP_031083026.1	2
BP	GO:0044070	regulation of anion transport	2/358	17/3915	0.469326	0.967231	0.967231	XP_031080123.1/XP_031085409.1	2
BP	GO:0046889	positive regulation of lipid biosynthetic process	2/358	17/3915	0.469326	0.967231	0.967231	XP_031079008.1/XP_031083915.1	2
BP	GO:0097306	cellular response to alcohol	2/358	17/3915	0.469326	0.967231	0.967231	XP_031080117.1/XP_031086811.1	2
BP	GO:1902115	regulation of organelle assembly	2/358	17/3915	0.469326	0.967231	0.967231	XP_031082412.1/XP_031083242.1	2
BP	GO:1902299	pre-replicative complex assembly involved in cell cycle DNA replication	2/358	17/3915	0.469326	0.967231	0.967231	XP_031087542.1/XP_031086974.1	2
BP	GO:0044182	filamentous growth of a population of unicellular organisms	15/358	157/3915	0.469664	0.967231	0.967231	XP_031076272.1/XP_031075541.1/XP_031075320.1/XP_031075082.1/XP_031077765.1/XP_031077505.1/XP_031080117.1/XP_031080296.1/XP_031078792.1/XP_031083543.1/XP_031087533.1/XP_031087597.1/XP_031081814.1/XP_031081869.1/XP_031081891.1	15
MF	GO:0000217	DNA secondary structure binding	2/310	17/3385	0.470193	0.932611	0.932611	XP_031076249.1/XP_031083571.1	2
MF	GO:0015605	organophosphate ester transmembrane transporter activity	2/310	17/3385	0.470193	0.932611	0.932611	XP_031079489.1/XP_031082574.1	2
MF	GO:0015662	P-type ion transporter activity	2/310	17/3385	0.470193	0.932611	0.932611	XP_031075974.1/XP_031088002.1	2
MF	GO:0016814	hydrolase activity, acting on carbon-nitrogen (but not peptide) bonds, in cyclic amidines	2/310	17/3385	0.470193	0.932611	0.932611	XP_031075911.1/XP_031077385.1	2
MF	GO:0042162	telomeric DNA binding	2/310	17/3385	0.470193	0.932611	0.932611	XP_031076249.1/XP_031075508.1	2
MF	GO:0140358	P-type transmembrane transporter activity	2/310	17/3385	0.470193	0.932611	0.932611	XP_031075974.1/XP_031088002.1	2
BP	GO:0001932	regulation of protein phosphorylation	10/358	103/3915	0.470758	0.967231	0.967231	XP_031076102.1/XP_031075082.1/XP_031077753.1/XP_031077200.1/XP_031080635.1/XP_031080828.1/XP_031083543.1/XP_031087419.1/XP_031081471.1/XP_031088119.1	10
BP	GO:0055065	metal ion homeostasis	11/358	114/3915	0.473047	0.967231	0.967231	XP_031075386.1/XP_031075212.1/XP_031075086.1/XP_031077362.1/XP_031077249.1/XP_031077076.1/XP_031079915.1/XP_031079696.1/XP_031079299.1/XP_031088960.1/XP_031088002.1	11
BP	GO:0009408	response to heat	6/358	60/3915	0.473306	0.967231	0.967231	XP_031077563.1/XP_031077216.1/XP_031076958.1/XP_031080695.1/XP_031083543.1/XP_031088031.1	6
BP	GO:0042255	ribosome assembly	6/358	60/3915	0.473306	0.967231	0.967231	XP_031075508.1/XP_031077225.1/XP_031080598.1/XP_031080834.1/XP_031079174.1/XP_031087711.1	6
BP	GO:0032446	protein modification by small protein conjugation	12/358	125/3915	0.475067	0.967231	0.967231	XP_031076094.1/XP_031075198.1/XP_031077854.1/XP_031077753.1/XP_031080052.1/XP_031080135.1/XP_031080635.1/XP_031080895.1/XP_031087641.1/XP_031089719.1/XP_031082013.1/XP_031087977.1	12
BP	GO:0051336	regulation of hydrolase activity	12/358	125/3915	0.475067	0.967231	0.967231	XP_031075779.1/XP_031075193.1/XP_031075082.1/XP_031077574.1/XP_031077563.1/XP_031077216.1/XP_031080123.1/XP_031079517.1/XP_031079022.1/XP_031086970.1/XP_031086974.1/XP_031087981.1	12
BP	GO:0031123	RNA 3'-end processing	7/358	71/3915	0.476591	0.967231	0.967231	XP_031077753.1/XP_031080635.1/XP_031080826.1/XP_031079462.1/XP_031087361.1/XP_031086923.1/XP_031086938.1	7
BP	GO:1902275	regulation of chromatin organization	7/358	71/3915	0.476591	0.967231	0.967231	XP_031076197.1/XP_031075968.1/XP_031077753.1/XP_031080635.1/XP_031082799.1/XP_031082893.1/XP_031081529.1	7
CC	GO:0035770	ribonucleoprotein granule	10/343	104/3769	0.477138	0.964699	0.964699	XP_031075875.1/XP_031075268.1/XP_031077900.1/XP_031077854.1/XP_031077760.1/XP_031077235.1/XP_031076955.1/XP_031079936.1/XP_031087729.1/XP_031082412.1	10
CC	GO:0036464	cytoplasmic ribonucleoprotein granule	10/343	104/3769	0.477138	0.964699	0.964699	XP_031075875.1/XP_031075268.1/XP_031077900.1/XP_031077854.1/XP_031077760.1/XP_031077235.1/XP_031076955.1/XP_031079936.1/XP_031087729.1/XP_031082412.1	10
BP	GO:0098662	inorganic cation transmembrane transport	14/358	147/3915	0.478498	0.967231	0.967231	XP_031075974.1/XP_031075386.1/XP_031075212.1/XP_031077635.1/XP_031077325.1/XP_031079915.1/XP_031080975.1/XP_031079696.1/XP_031079299.1/XP_031078721.1/XP_031082574.1/XP_031082027.1/XP_031088002.1/XP_031084712.1	14
BP	GO:0006515	protein quality control for misfolded or incompletely synthesized proteins	3/358	28/3915	0.478824	0.967231	0.967231	XP_031077563.1/XP_031078995.1/XP_031082513.1	3
BP	GO:0015698	inorganic anion transport	3/358	28/3915	0.478824	0.967231	0.967231	XP_031075517.1/XP_031077505.1/XP_031077362.1	3
BP	GO:0035304	regulation of protein dephosphorylation	3/358	28/3915	0.478824	0.967231	0.967231	XP_031075779.1/XP_031080695.1/XP_031087981.1	3
BP	GO:0071478	cellular response to radiation	3/358	28/3915	0.478824	0.967231	0.967231	XP_031079334.1/XP_031087411.1/XP_031088119.1	3
BP	GO:0043549	regulation of kinase activity	8/358	82/3915	0.479257	0.967231	0.967231	XP_031076102.1/XP_031080828.1/XP_031083915.1/XP_031083630.1/XP_031083543.1/XP_031087419.1/XP_031081471.1/XP_031088119.1	8
MF	GO:0004857	enzyme inhibitor activity	3/310	28/3385	0.479925	0.932611	0.932611	XP_031076102.1/XP_031083543.1/XP_031081529.1	3
BP	GO:1902680	positive regulation of RNA biosynthetic process	23/358	245/3915	0.480272	0.967231	0.967231	XP_031075808.1/XP_031075534.1/XP_031075320.1/XP_031074816.1/XP_031074691.1/XP_031077988.1/XP_031077854.1/XP_031077810.1/XP_031077753.1/XP_031077424.1/XP_031077249.1/XP_031077200.1/XP_031076955.1/XP_031076726.1/XP_031080635.1/XP_031084058.1/XP_031083555.1/XP_031082799.1/XP_031082893.1/XP_031082916.1/XP_031081872.1/XP_031088031.1/XP_031088297.1	23
MF	GO:0017076	purine nucleotide binding	28/310	299/3385	0.480748	0.932611	0.932611	XP_031076045.1/XP_031075974.1/XP_031075320.1/XP_031075268.1/XP_031075017.1/XP_031075015.1/XP_031074813.1/XP_031074765.1/XP_031077889.1/XP_031077724.1/XP_031077603.1/XP_031077189.1/XP_031077138.1/XP_031076636.1/XP_031080834.1/XP_031080861.1/XP_031079334.1/XP_031079044.1/XP_031083630.1/XP_031083543.1/XP_031087711.1/XP_031082568.1/XP_031082989.1/XP_031081471.1/XP_031081674.1/XP_031081814.1/XP_031088…	28
BP	GO:0008033	tRNA processing	10/358	104/3915	0.483411	0.967231	0.967231	XP_031076062.1/XP_031075320.1/XP_031077506.1/XP_031077072.1/XP_031080052.1/XP_031080712.1/XP_031080826.1/XP_031087352.1/XP_031087361.1/XP_031082064.1	10
BP	GO:0006468	protein phosphorylation	18/358	191/3915	0.483769	0.967231	0.967231	XP_031076102.1/XP_031076045.1/XP_031075320.1/XP_031075082.1/XP_031074765.1/XP_031077753.1/XP_031077200.1/XP_031080452.1/XP_031080635.1/XP_031080828.1/XP_031079334.1/XP_031083630.1/XP_031083543.1/XP_031087419.1/XP_031089703.1/XP_031081471.1/XP_031089003.1/XP_031088119.1	18
BP	GO:0006312	mitotic recombination	4/358	39/3915	0.483919	0.967231	0.967231	XP_031079022.1/XP_031083817.1/XP_031087641.1/XP_031089003.1	4
BP	GO:0006696	ergosterol biosynthetic process	4/358	39/3915	0.483919	0.967231	0.967231	XP_031077765.1/XP_031077586.1/XP_031080872.1/XP_031088960.1	4
BP	GO:0016074	sno(s)RNA metabolic process	4/358	39/3915	0.483919	0.967231	0.967231	XP_031076062.1/XP_031080635.1/XP_031079462.1/XP_031086923.1	4
BP	GO:0016129	phytosteroid biosynthetic process	4/358	39/3915	0.483919	0.967231	0.967231	XP_031077765.1/XP_031077586.1/XP_031080872.1/XP_031088960.1	4
BP	GO:0022616	DNA strand elongation	4/358	39/3915	0.483919	0.967231	0.967231	XP_031077200.1/XP_031077189.1/XP_031087542.1/XP_031086974.1	4
BP	GO:0044108	cellular alcohol biosynthetic process	4/358	39/3915	0.483919	0.967231	0.967231	XP_031077765.1/XP_031077586.1/XP_031080872.1/XP_031088960.1	4
BP	GO:0072525	pyridine-containing compound biosynthetic process	4/358	39/3915	0.483919	0.967231	0.967231	XP_031075629.1/XP_031077138.1/XP_031079702.1/XP_031082436.1	4
BP	GO:0097384	cellular lipid biosynthetic process	4/358	39/3915	0.483919	0.967231	0.967231	XP_031077765.1/XP_031077586.1/XP_031080872.1/XP_031088960.1	4
BP	GO:0042254	ribosome biogenesis	28/358	300/3915	0.484799	0.967231	0.967231	XP_031076062.1/XP_031076000.1/XP_031075875.1/XP_031075508.1/XP_031075017.1/XP_031074691.1/XP_031077730.1/XP_031077602.1/XP_031077225.1/XP_031080598.1/XP_031080635.1/XP_031080695.1/XP_031080757.1/XP_031080834.1/XP_031079462.1/XP_031079223.1/XP_031079174.1/XP_031084345.1/XP_031087645.1/XP_031087711.1/XP_031082638.1/XP_031083242.1/XP_031081510.1/XP_031081550.1/XP_031081551.1/XP_031081702.1/XP_031086…	28
CC	GO:0000779	condensed chromosome, centromeric region	6/343	61/3769	0.485002	0.964699	0.964699	XP_031075390.1/XP_031074871.1/XP_031080052.1/XP_031080695.1/XP_031080899.1/XP_031081739.1	6
CC	GO:0000794	condensed nuclear chromosome	7/343	72/3769	0.486561	0.964699	0.964699	XP_031075390.1/XP_031074871.1/XP_031077603.1/XP_031080695.1/XP_031081739.1/XP_031081999.1/XP_031088119.1	7
BP	GO:0031400	negative regulation of protein modification process	5/358	50/3915	0.487296	0.967231	0.967231	XP_031076102.1/XP_031075968.1/XP_031080828.1/XP_031083543.1/XP_031087641.1	5
CC	GO:0000139	Golgi membrane	8/343	83/3769	0.487805	0.964699	0.964699	XP_031079915.1/XP_031080222.1/XP_031084018.1/XP_031087453.1/XP_031081977.1/XP_031086927.1/XP_031088892.1/XP_031089001.1	8
MF	GO:0008135	translation factor activity, RNA binding	5/310	50/3385	0.48876	0.932611	0.932611	XP_031075875.1/XP_031077900.1/XP_031077760.1/XP_031080493.1/XP_031082568.1	5
BP	GO:0010638	positive regulation of organelle organization	14/358	148/3915	0.489148	0.967231	0.967231	XP_031075968.1/XP_031075390.1/XP_031075082.1/XP_031077753.1/XP_031077138.1/XP_031080635.1/XP_031080695.1/XP_031084018.1/XP_031082412.1/XP_031082939.1/XP_031081824.1/XP_031082013.1/XP_031088783.1/XP_031088031.1	14
BP	GO:0070783	growth of unicellular organism as a thread of attached cells	7/358	72/3915	0.491764	0.967231	0.967231	XP_031076272.1/XP_031075541.1/XP_031075082.1/XP_031077765.1/XP_031080117.1/XP_031080296.1/XP_031081814.1	7
BP	GO:0062197	cellular response to chemical stress	17/358	181/3915	0.492265	0.967231	0.967231	XP_031075629.1/XP_031075445.1/XP_031075390.1/XP_031075320.1/XP_031074995.1/XP_031074849.1/XP_031074765.1/XP_031080452.1/XP_031079334.1/XP_031078792.1/XP_031078697.1/XP_031083817.1/XP_031087758.1/XP_031083342.1/XP_031081739.1/XP_031086937.1/XP_031088960.1	17
BP	GO:1901605	alpha-amino acid metabolic process	17/358	181/3915	0.492265	0.967231	0.967231	XP_031075268.1/XP_031075183.1/XP_031074995.1/XP_031078049.1/XP_031077592.1/XP_031077257.1/XP_031077235.1/XP_031080117.1/XP_031080639.1/XP_031079062.1/XP_031083772.1/XP_031083566.1/XP_031082916.1/XP_031083027.1/XP_031081700.1/XP_031081710.1/XP_031086811.1	17
BP	GO:0098655	cation transmembrane transport	18/358	192/3915	0.493165	0.967231	0.967231	XP_031075974.1/XP_031075386.1/XP_031075212.1/XP_031077635.1/XP_031077325.1/XP_031079915.1/XP_031080123.1/XP_031080975.1/XP_031079696.1/XP_031079319.1/XP_031079299.1/XP_031078721.1/XP_031087632.1/XP_031082574.1/XP_031082027.1/XP_031088002.1/XP_031084712.1/XP_031085409.1	18
BP	GO:0016050	vesicle organization	8/358	83/3915	0.493394	0.967231	0.967231	XP_031077288.1/XP_031080598.1/XP_031079517.1/XP_031084018.1/XP_031087591.1/XP_031081977.1/XP_031086970.1/XP_031086989.1	8
BP	GO:0016197	endosomal transport	8/358	83/3915	0.493394	0.967231	0.967231	XP_031075417.1/XP_031077288.1/XP_031079951.1/XP_031080038.1/XP_031080598.1/XP_031079142.1/XP_031087591.1/XP_031087019.1	8
MF	GO:0004386	helicase activity	7/310	72/3385	0.493524	0.932611	0.932611	XP_031075017.1/XP_031077189.1/XP_031080153.1/XP_031080834.1/XP_031087711.1/XP_031081550.1/XP_031089003.1	7
BP	GO:0034293	sexual sporulation	9/358	94/3915	0.494784	0.967231	0.967231	XP_031076249.1/XP_031077613.1/XP_031077288.1/XP_031080315.1/XP_031080695.1/XP_031083732.1/XP_031082978.1/XP_031081977.1/XP_031088783.1	9
BP	GO:0043935	sexual sporulation resulting in formation of a cellular spore	9/358	94/3915	0.494784	0.967231	0.967231	XP_031076249.1/XP_031077613.1/XP_031077288.1/XP_031080315.1/XP_031080695.1/XP_031083732.1/XP_031082978.1/XP_031081977.1/XP_031088783.1	9
MF	GO:0022853	active ion transmembrane transporter activity	8/310	83/3385	0.495286	0.932611	0.932611	XP_031075974.1/XP_031077325.1/XP_031080824.1/XP_031080915.1/XP_031079696.1/XP_031079489.1/XP_031082574.1/XP_031088002.1	8
MF	GO:0051020	GTPase binding	8/310	83/3385	0.495286	0.932611	0.932611	XP_031075417.1/XP_031077291.1/XP_031080190.1/XP_031079517.1/XP_031083242.1/XP_031081869.1/XP_031087019.1/XP_031088892.1	8
CC	GO:0030658	transport vesicle membrane	2/343	18/3769	0.497419	0.964699	0.964699	XP_031079142.1/XP_031086970.1	2
CC	GO:0031985	Golgi cisterna	2/343	18/3769	0.497419	0.964699	0.964699	XP_031077362.1/XP_031089001.1	2
CC	GO:0005732	sno(s)RNA-containing ribonucleoprotein complex	3/343	29/3769	0.499494	0.964699	0.964699	XP_031076062.1/XP_031075508.1/XP_031086923.1	3
BP	GO:0006037	cell wall chitin metabolic process	2/358	18/3915	0.500051	0.967231	0.967231	XP_031075652.1/XP_031078096.1	2
BP	GO:0006111	regulation of gluconeogenesis	2/358	18/3915	0.500051	0.967231	0.967231	XP_031080120.1/XP_031083555.1	2
BP	GO:0006672	ceramide metabolic process	2/358	18/3915	0.500051	0.967231	0.967231	XP_031081729.1/XP_031088325.1	2
BP	GO:0006740	NADPH regeneration	2/358	18/3915	0.500051	0.967231	0.967231	XP_031075629.1/XP_031079702.1	2
BP	GO:0009251	glucan catabolic process	2/358	18/3915	0.500051	0.967231	0.967231	XP_031075883.1/XP_031075429.1	2
BP	GO:0010508	positive regulation of autophagy	2/358	18/3915	0.500051	0.967231	0.967231	XP_031077138.1/XP_031087019.1	2
BP	GO:0030476	ascospore wall assembly	2/358	18/3915	0.500051	0.967231	0.967231	XP_031077613.1/XP_031088783.1	2
BP	GO:0038202	TORC1 signaling	2/358	18/3915	0.500051	0.967231	0.967231	XP_031075320.1/XP_031080123.1	2
BP	GO:0043936	asexual sporulation resulting in formation of a cellular spore	2/358	18/3915	0.500051	0.967231	0.967231	XP_031075320.1/XP_031081891.1	2
BP	GO:0043954	cellular component maintenance	2/358	18/3915	0.500051	0.967231	0.967231	XP_031075390.1/XP_031082799.1	2
BP	GO:0045815	epigenetic maintenance of chromatin in transcription-competent conformation	2/358	18/3915	0.500051	0.967231	0.967231	XP_031082799.1/XP_031082893.1	2
BP	GO:0051031	tRNA transport	2/358	18/3915	0.500051	0.967231	0.967231	XP_031075015.1/XP_031082568.1	2
BP	GO:0061951	establishment of protein localization to plasma membrane	2/358	18/3915	0.500051	0.967231	0.967231	XP_031079008.1/XP_031081977.1	2
CC	GO:0000123	histone acetyltransferase complex	4/343	40/3769	0.500394	0.964699	0.964699	XP_031074816.1/XP_031082799.1/XP_031081872.1/XP_031086838.1	4
MF	GO:0004222	metalloendopeptidase activity	2/310	18/3385	0.500948	0.932611	0.932611	XP_031074933.1/XP_031079610.1	2
MF	GO:0015175	neutral amino acid transmembrane transporter activity	2/310	18/3385	0.500948	0.932611	0.932611	XP_031079319.1/XP_031087632.1	2
MF	GO:0019900	kinase binding	2/310	18/3385	0.500948	0.932611	0.932611	XP_031075082.1/XP_031077189.1	2
CC	GO:0043332	mating projection tip	9/343	95/3769	0.502018	0.964699	0.964699	XP_031075768.1/XP_031075082.1/XP_031077613.1/XP_031080315.1/XP_031082939.1/XP_031083015.1/XP_031081814.1/XP_031081869.1/XP_031081928.1	9
BP	GO:0007533	mating type switching	3/358	29/3915	0.502803	0.967231	0.967231	XP_031075968.1/XP_031083817.1/XP_031087419.1	3
BP	GO:0009084	glutamine family amino acid biosynthetic process	3/358	29/3915	0.502803	0.967231	0.967231	XP_031078049.1/XP_031077235.1/XP_031080117.1	3
BP	GO:0009119	ribonucleoside metabolic process	3/358	29/3915	0.502803	0.967231	0.967231	XP_031077656.1/XP_031082436.1/XP_031083026.1	3
BP	GO:0043462	regulation of ATP-dependent activity	3/358	29/3915	0.502803	0.967231	0.967231	XP_031077563.1/XP_031077216.1/XP_031086974.1	3
BP	GO:0060284	regulation of cell development	3/358	29/3915	0.502803	0.967231	0.967231	XP_031077816.1/XP_031080222.1/XP_031083699.1	3
BP	GO:1990700	nucleolar chromatin organization	3/358	29/3915	0.502803	0.967231	0.967231	XP_031080635.1/XP_031087597.1/XP_031082893.1	3
BP	GO:0006259	DNA metabolic process	34/358	368/3915	0.503033	0.967231	0.967231	XP_031076249.1/XP_031076045.1/XP_031075829.1/XP_031075445.1/XP_031075215.1/XP_031075200.1/XP_031077753.1/XP_031077603.1/XP_031077200.1/XP_031077189.1/XP_031089054.1/XP_031080570.1/XP_031080635.1/XP_031080695.1/XP_031080895.1/XP_031079022.1/XP_031083817.1/XP_031083571.1/XP_031087411.1/XP_031087419.1/XP_031087533.1/XP_031087542.1/XP_031087641.1/XP_031089719.1/XP_031082412.1/XP_031082671.1/XP_031082…	34
MF	GO:0016209	antioxidant activity	3/310	29/3385	0.503932	0.932611	0.932611	XP_031078792.1/XP_031078697.1/XP_031083342.1	3
BP	GO:0009268	response to pH	4/358	40/3915	0.504267	0.967231	0.967231	XP_031076272.1/XP_031075541.1/XP_031079334.1/XP_031081891.1	4
BP	GO:0045595	regulation of cell differentiation	4/358	40/3915	0.504267	0.967231	0.967231	XP_031075968.1/XP_031077816.1/XP_031080222.1/XP_031083699.1	4
BP	GO:0048308	organelle inheritance	4/358	40/3915	0.504267	0.967231	0.967231	XP_031075417.1/XP_031080315.1/XP_031084047.1/XP_031088783.1	4
BP	GO:0010563	negative regulation of phosphorus metabolic process	5/358	51/3915	0.505293	0.967231	0.967231	XP_031076102.1/XP_031080828.1/XP_031079008.1/XP_031083543.1/XP_031081977.1	5
BP	GO:0035966	response to topologically incorrect protein	5/358	51/3915	0.505293	0.967231	0.967231	XP_031075779.1/XP_031080695.1/XP_031078995.1/XP_031082513.1/XP_031088318.1	5
BP	GO:0044242	cellular lipid catabolic process	5/358	51/3915	0.505293	0.967231	0.967231	XP_031076323.1/XP_031076028.1/XP_031074564.1/XP_031078906.1/XP_031086048.1	5
BP	GO:0045936	negative regulation of phosphate metabolic process	5/358	51/3915	0.505293	0.967231	0.967231	XP_031076102.1/XP_031080828.1/XP_031079008.1/XP_031083543.1/XP_031081977.1	5
MF	GO:0046872	metal ion binding	19/310	204/3385	0.506174	0.932611	0.932611	XP_031076249.1/XP_031076094.1/XP_031075846.1/XP_031075768.1/XP_031075534.1/XP_031075445.1/XP_031074933.1/XP_031077613.1/XP_031077385.1/XP_031077249.1/XP_031076726.1/XP_031080135.1/XP_031080190.1/XP_031078995.1/XP_031083630.1/XP_031083555.1/XP_031082685.1/XP_031083060.1/XP_031086970.1	19
MF	GO:0016779	nucleotidyltransferase activity	5/310	51/3385	0.506786	0.932611	0.932611	XP_031075096.1/XP_031077200.1/XP_031087361.1/XP_031089703.1/XP_031081705.1	5
BP	GO:0005996	monosaccharide metabolic process	8/358	84/3915	0.507423	0.967231	0.967231	XP_031077138.1/XP_031080120.1/XP_031079702.1/XP_031079062.1/XP_031083678.1/XP_031083555.1/XP_031081548.1/XP_031086811.1	8
BP	GO:0045017	glycerolipid biosynthetic process	8/358	84/3915	0.507423	0.967231	0.967231	XP_031075768.1/XP_031080857.1/XP_031079008.1/XP_031078906.1/XP_031083915.1/XP_031082994.1/XP_031081977.1/XP_031087961.1	8
BP	GO:0006402	mRNA catabolic process	9/358	95/3915	0.507986	0.967231	0.967231	XP_031076197.1/XP_031076062.1/XP_031075445.1/XP_031077854.1/XP_031077291.1/XP_031076955.1/XP_031079462.1/XP_031079233.1/XP_031082412.1	9
BP	GO:0016567	protein ubiquitination	10/358	106/3915	0.508507	0.967231	0.967231	XP_031076094.1/XP_031075198.1/XP_031077854.1/XP_031077753.1/XP_031080135.1/XP_031080635.1/XP_031080895.1/XP_031087641.1/XP_031089719.1/XP_031082013.1	10
BP	GO:0051668	localization within membrane	13/358	139/3915	0.509898	0.967231	0.967231	XP_031077816.1/XP_031077765.1/XP_031079951.1/XP_031080190.1/XP_031080315.1/XP_031080598.1/XP_031079008.1/XP_031087564.1/XP_031083060.1/XP_031083105.1/XP_031081426.1/XP_031081977.1/XP_031087019.1	13
BP	GO:0030003	cellular cation homeostasis	14/358	150/3915	0.51032	0.967231	0.967231	XP_031075974.1/XP_031075386.1/XP_031075212.1/XP_031075086.1/XP_031077362.1/XP_031077249.1/XP_031077138.1/XP_031077076.1/XP_031079915.1/XP_031079696.1/XP_031079299.1/XP_031089703.1/XP_031088960.1/XP_031088002.1	14
CC	GO:0015630	microtubule cytoskeleton	11/343	118/3769	0.514195	0.964699	0.964699	XP_031075390.1/XP_031074938.1/XP_031074871.1/XP_031077574.1/XP_031080052.1/XP_031080315.1/XP_031080695.1/XP_031080861.1/XP_031080899.1/XP_031087601.1/XP_031083242.1	11
CC	GO:0030135	coated vesicle	6/343	63/3769	0.517407	0.964699	0.964699	XP_031075385.1/XP_031077596.1/XP_031079142.1/XP_031084018.1/XP_031086970.1/XP_031085409.1	6
MF	GO:0032555	purine ribonucleotide binding	27/310	293/3385	0.518607	0.932611	0.932611	XP_031076045.1/XP_031075974.1/XP_031075320.1/XP_031075268.1/XP_031075017.1/XP_031075015.1/XP_031074813.1/XP_031074765.1/XP_031077724.1/XP_031077603.1/XP_031077189.1/XP_031077138.1/XP_031076636.1/XP_031080834.1/XP_031080861.1/XP_031079334.1/XP_031079044.1/XP_031083630.1/XP_031083543.1/XP_031087711.1/XP_031082568.1/XP_031082989.1/XP_031081471.1/XP_031081674.1/XP_031081814.1/XP_031088783.1/XP_031089…	27
BP	GO:0071824	protein-DNA complex subunit organization	14/358	151/3915	0.520827	0.967231	0.967231	XP_031076197.1/XP_031075968.1/XP_031077810.1/XP_031080076.1/XP_031080570.1/XP_031083817.1/XP_031087419.1/XP_031087542.1/XP_031082859.1/XP_031081872.1/XP_031086838.1/XP_031086974.1/XP_031087981.1/XP_031088297.1	14
BP	GO:0090407	organophosphate biosynthetic process	21/358	228/3915	0.521553	0.967231	0.967231	XP_031075768.1/XP_031075629.1/XP_031077889.1/XP_031077656.1/XP_031077586.1/XP_031077138.1/XP_031080857.1/XP_031079702.1/XP_031079474.1/XP_031079008.1/XP_031078906.1/XP_031084047.1/XP_031083915.1/XP_031083555.1/XP_031089689.1/XP_031082994.1/XP_031083026.1/XP_031081674.1/XP_031081977.1/XP_031086769.1/XP_031087961.1	21
BP	GO:0044089	positive regulation of cellular component biogenesis	7/358	74/3915	0.521696	0.967231	0.967231	XP_031075390.1/XP_031080695.1/XP_031084018.1/XP_031082412.1/XP_031082939.1/XP_031081872.1/XP_031088783.1	7
BP	GO:0006281	DNA repair	22/358	239/3915	0.5217	0.967231	0.967231	XP_031076249.1/XP_031075445.1/XP_031075200.1/XP_031077753.1/XP_031077603.1/XP_031077200.1/XP_031077189.1/XP_031080635.1/XP_031079022.1/XP_031083817.1/XP_031083571.1/XP_031087411.1/XP_031087419.1/XP_031087533.1/XP_031087542.1/XP_031087641.1/XP_031089719.1/XP_031082412.1/XP_031082989.1/XP_031086974.1/XP_031089003.1/XP_031088119.1	22
BP	GO:0051235	maintenance of location	6/358	63/3915	0.522237	0.967231	0.967231	XP_031079915.1/XP_031080857.1/XP_031084047.1/XP_031089703.1/XP_031086989.1/XP_031088002.1	6
BP	GO:0009124	nucleoside monophosphate biosynthetic process	5/358	52/3915	0.523037	0.967231	0.967231	XP_031075629.1/XP_031077656.1/XP_031077138.1/XP_031079702.1/XP_031083026.1	5
BP	GO:0051651	maintenance of location in cell	5/358	52/3915	0.523037	0.967231	0.967231	XP_031079915.1/XP_031084047.1/XP_031089703.1/XP_031086989.1/XP_031088002.1	5
MF	GO:0016746	acyltransferase activity	10/310	107/3385	0.52313	0.932611	0.932611	XP_031075138.1/XP_031074564.1/XP_031074392.1/XP_031080038.1/XP_031079474.1/XP_031078929.1/XP_031078681.1/XP_031082799.1/XP_031081729.1/XP_031086769.1	10
MF	GO:0015291	secondary active transmembrane transporter activity	6/310	63/3385	0.523912	0.932611	0.932611	XP_031077325.1/XP_031080824.1/XP_031080915.1/XP_031079696.1/XP_031079489.1/XP_031082574.1	6
BP	GO:0032501	multicellular organismal process	4/358	41/3915	0.524255	0.967231	0.967231	XP_031077816.1/XP_031077286.1/XP_031080222.1/XP_031083699.1	4
BP	GO:1901657	glycosyl compound metabolic process	4/358	41/3915	0.524255	0.967231	0.967231	XP_031077656.1/XP_031077506.1/XP_031082436.1/XP_031083026.1	4
BP	GO:0006366	transcription by RNA polymerase II	38/358	415/3915	0.52453	0.967231	0.967231	XP_031076197.1/XP_031075968.1/XP_031075846.1/XP_031075808.1/XP_031075779.1/XP_031075534.1/XP_031075445.1/XP_031075320.1/XP_031074849.1/XP_031074816.1/XP_031077989.1/XP_031077988.1/XP_031077854.1/XP_031077810.1/XP_031077753.1/XP_031077424.1/XP_031077291.1/XP_031077249.1/XP_031077076.1/XP_031076955.1/XP_031076726.1/XP_031080052.1/XP_031080635.1/XP_031080695.1/XP_031079389.1/XP_031084058.1/XP_031083…	38
BP	GO:0001933	negative regulation of protein phosphorylation	3/358	30/3915	0.526205	0.967231	0.967231	XP_031076102.1/XP_031080828.1/XP_031083543.1	3
BP	GO:0008361	regulation of cell size	3/358	30/3915	0.526205	0.967231	0.967231	XP_031075320.1/XP_031089703.1/XP_031081705.1	3
BP	GO:0019359	nicotinamide nucleotide biosynthetic process	3/358	30/3915	0.526205	0.967231	0.967231	XP_031075629.1/XP_031077138.1/XP_031079702.1	3
BP	GO:0031109	microtubule polymerization or depolymerization	3/358	30/3915	0.526205	0.967231	0.967231	XP_031074938.1/XP_031074871.1/XP_031080899.1	3
CC	GO:0005775	vacuolar lumen	2/343	19/3769	0.526942	0.964699	0.964699	XP_031080803.1/XP_031088333.1	2
CC	GO:0008023	transcription elongation factor complex	2/343	19/3769	0.526942	0.964699	0.964699	XP_031077753.1/XP_031080635.1	2
CC	GO:0008287	protein serine/threonine phosphatase complex	2/343	19/3769	0.526942	0.964699	0.964699	XP_031075779.1/XP_031080695.1	2
CC	GO:1903293	phosphatase complex	2/343	19/3769	0.526942	0.964699	0.964699	XP_031075779.1/XP_031080695.1	2
BP	GO:0000422	autophagy of mitochondrion	2/358	19/3915	0.529612	0.967231	0.967231	XP_031076958.1/XP_031089001.1	2
BP	GO:0006144	purine nucleobase metabolic process	2/358	19/3915	0.529612	0.967231	0.967231	XP_031075911.1/XP_031077385.1	2
BP	GO:0019395	fatty acid oxidation	2/358	19/3915	0.529612	0.967231	0.967231	XP_031076323.1/XP_031086048.1	2
BP	GO:0032781	positive regulation of ATP-dependent activity	2/358	19/3915	0.529612	0.967231	0.967231	XP_031077563.1/XP_031077216.1	2
BP	GO:0034204	lipid translocation	2/358	19/3915	0.529612	0.967231	0.967231	XP_031080598.1/XP_031087712.1	2
BP	GO:0034440	lipid oxidation	2/358	19/3915	0.529612	0.967231	0.967231	XP_031076323.1/XP_031086048.1	2
BP	GO:0036003	positive regulation of transcription from RNA polymerase II promoter in response to stress	2/358	19/3915	0.529612	0.967231	0.967231	XP_031075534.1/XP_031088031.1	2
BP	GO:0045597	positive regulation of cell differentiation	2/358	19/3915	0.529612	0.967231	0.967231	XP_031080222.1/XP_031083699.1	2
BP	GO:0046112	nucleobase biosynthetic process	2/358	19/3915	0.529612	0.967231	0.967231	XP_031075911.1/XP_031077656.1	2
BP	GO:0046173	polyol biosynthetic process	2/358	19/3915	0.529612	0.967231	0.967231	XP_031083572.1/XP_031086574.1	2
BP	GO:0051568	histone H3-K4 methylation	2/358	19/3915	0.529612	0.967231	0.967231	XP_031075968.1/XP_031080635.1	2
BP	GO:0061726	mitochondrion disassembly	2/358	19/3915	0.529612	0.967231	0.967231	XP_031076958.1/XP_031089001.1	2
BP	GO:0071805	potassium ion transmembrane transport	2/358	19/3915	0.529612	0.967231	0.967231	XP_031088002.1/XP_031084712.1	2
BP	GO:0097305	response to alcohol	2/358	19/3915	0.529612	0.967231	0.967231	XP_031080117.1/XP_031086811.1	2
BP	GO:0098661	inorganic anion transmembrane transport	2/358	19/3915	0.529612	0.967231	0.967231	XP_031075517.1/XP_031077362.1	2
MF	GO:0005200	structural constituent of cytoskeleton	2/310	19/3385	0.530534	0.932611	0.932611	XP_031074938.1/XP_031074871.1	2
BP	GO:0044087	regulation of cellular component biogenesis	16/358	174/3915	0.530753	0.967231	0.967231	XP_031076197.1/XP_031075968.1/XP_031075390.1/XP_031075320.1/XP_031075082.1/XP_031080695.1/XP_031084018.1/XP_031087591.1/XP_031082412.1/XP_031082799.1/XP_031082939.1/XP_031083242.1/XP_031081814.1/XP_031081872.1/XP_031086970.1/XP_031088783.1	16
BP	GO:0140694	non-membrane-bounded organelle assembly	12/358	130/3915	0.53206	0.967231	0.967231	XP_031075974.1/XP_031075508.1/XP_031075390.1/XP_031074871.1/XP_031077225.1/XP_031080598.1/XP_031080834.1/XP_031079174.1/XP_031087601.1/XP_031087711.1/XP_031082412.1/XP_031083242.1	12
BP	GO:0009165	nucleotide biosynthetic process	10/358	108/3915	0.53325	0.967231	0.967231	XP_031075629.1/XP_031077889.1/XP_031077656.1/XP_031077138.1/XP_031079702.1/XP_031079474.1/XP_031083555.1/XP_031089689.1/XP_031083026.1/XP_031081674.1	10
CC	GO:0030684	preribosome	14/343	153/3769	0.53412	0.964699	0.964699	XP_031076000.1/XP_031075017.1/XP_031074691.1/XP_031077225.1/XP_031080834.1/XP_031079223.1/XP_031079174.1/XP_031087645.1/XP_031087711.1/XP_031082638.1/XP_031081510.1/XP_031081550.1/XP_031081702.1/XP_031086923.1	14
MF	GO:0008324	cation transmembrane transporter activity	13/310	141/3385	0.534198	0.932611	0.932611	XP_031075974.1/XP_031075212.1/XP_031077635.1/XP_031077325.1/XP_031079915.1/XP_031080975.1/XP_031079696.1/XP_031079319.1/XP_031078721.1/XP_031087632.1/XP_031082574.1/XP_031082027.1/XP_031088002.1	13
BP	GO:0140352	export from cell	8/358	86/3915	0.535099	0.967231	0.967231	XP_031075974.1/XP_031079951.1/XP_031080180.1/XP_031080315.1/XP_031079319.1/XP_031084018.1/XP_031081814.1/XP_031088002.1	8
BP	GO:0051726	regulation of cell cycle	29/358	318/3915	0.537626	0.967231	0.967231	XP_031076249.1/XP_031076045.1/XP_031075390.1/XP_031075320.1/XP_031074765.1/XP_031077854.1/XP_031077760.1/XP_031089054.1/XP_031080123.1/XP_031080452.1/XP_031080695.1/XP_031080828.1/XP_031079334.1/XP_031084058.1/XP_031083817.1/XP_031083571.1/XP_031083543.1/XP_031087419.1/XP_031087601.1/XP_031087641.1/XP_031082799.1/XP_031083242.1/XP_031081471.1/XP_031081814.1/XP_031081824.1/XP_031081869.1/XP_031082…	29
BP	GO:0009266	response to temperature stimulus	6/358	64/3915	0.538154	0.967231	0.967231	XP_031077563.1/XP_031077216.1/XP_031076958.1/XP_031080695.1/XP_031083543.1/XP_031088031.1	6
MF	GO:0035091	phosphatidylinositol binding	6/310	64/3385	0.539854	0.932611	0.932611	XP_031077288.1/XP_031080026.1/XP_031084047.1/XP_031087597.1/XP_031081977.1/XP_031089001.1	6
BP	GO:1990778	protein localization to cell periphery	5/358	53/3915	0.540504	0.967231	0.967231	XP_031080190.1/XP_031079008.1/XP_031082978.1/XP_031083060.1/XP_031081977.1	5
BP	GO:0055080	cation homeostasis	14/358	153/3915	0.541653	0.967231	0.967231	XP_031075974.1/XP_031075386.1/XP_031075212.1/XP_031075086.1/XP_031077362.1/XP_031077249.1/XP_031077138.1/XP_031077076.1/XP_031079915.1/XP_031079696.1/XP_031079299.1/XP_031089703.1/XP_031088960.1/XP_031088002.1	14
MF	GO:0035639	purine ribonucleoside triphosphate binding	26/310	285/3385	0.541694	0.932611	0.932611	XP_031076045.1/XP_031075974.1/XP_031075320.1/XP_031075268.1/XP_031075017.1/XP_031075015.1/XP_031074813.1/XP_031074765.1/XP_031077724.1/XP_031077603.1/XP_031077189.1/XP_031077138.1/XP_031076636.1/XP_031080834.1/XP_031080861.1/XP_031079334.1/XP_031079044.1/XP_031083630.1/XP_031087711.1/XP_031082568.1/XP_031082989.1/XP_031081471.1/XP_031081674.1/XP_031081814.1/XP_031088783.1/XP_031089003.1	26
BP	GO:0000470	maturation of LSU-rRNA	4/358	42/3915	0.543851	0.967231	0.967231	XP_031079223.1/XP_031087645.1/XP_031087711.1/XP_031081510.1	4
BP	GO:0000749	response to pheromone triggering conjugation with cellular fusion	4/358	42/3915	0.543851	0.967231	0.967231	XP_031077854.1/XP_031080598.1/XP_031081814.1/XP_031081869.1	4
BP	GO:0009127	purine nucleoside monophosphate biosynthetic process	4/358	42/3915	0.543851	0.967231	0.967231	XP_031075629.1/XP_031077138.1/XP_031079702.1/XP_031083026.1	4
BP	GO:0009168	purine ribonucleoside monophosphate biosynthetic process	4/358	42/3915	0.543851	0.967231	0.967231	XP_031075629.1/XP_031077138.1/XP_031079702.1/XP_031083026.1	4
BP	GO:0030436	asexual sporulation	4/358	42/3915	0.543851	0.967231	0.967231	XP_031075320.1/XP_031080222.1/XP_031083699.1/XP_031081891.1	4
BP	GO:0032786	positive regulation of DNA-templated transcription, elongation	4/358	42/3915	0.543851	0.967231	0.967231	XP_031077854.1/XP_031077753.1/XP_031076955.1/XP_031080635.1	4
BP	GO:0034243	regulation of transcription elongation by RNA polymerase II	4/358	42/3915	0.543851	0.967231	0.967231	XP_031077854.1/XP_031077753.1/XP_031076955.1/XP_031080635.1	4
BP	GO:0072503	cellular divalent inorganic cation homeostasis	4/358	42/3915	0.543851	0.967231	0.967231	XP_031075212.1/XP_031077076.1/XP_031079915.1/XP_031088002.1	4
BP	GO:1901293	nucleoside phosphate biosynthetic process	10/358	109/3915	0.545464	0.967231	0.967231	XP_031075629.1/XP_031077889.1/XP_031077656.1/XP_031077138.1/XP_031079702.1/XP_031079474.1/XP_031083555.1/XP_031089689.1/XP_031083026.1/XP_031081674.1	10
CC	GO:0030117	membrane coat	3/343	31/3769	0.545633	0.964699	0.964699	XP_031077596.1/XP_031079142.1/XP_031086970.1	3
CC	GO:0048475	coated membrane	3/343	31/3769	0.545633	0.964699	0.964699	XP_031077596.1/XP_031079142.1/XP_031086970.1	3
BP	GO:0098754	detoxification	8/358	87/3915	0.548719	0.967231	0.967231	XP_031074392.1/XP_031080734.1/XP_031079319.1/XP_031078929.1/XP_031078792.1/XP_031078697.1/XP_031087758.1/XP_031083342.1	8
BP	GO:0007530	sex determination	3/358	31/3915	0.548987	0.967231	0.967231	XP_031075968.1/XP_031083817.1/XP_031087419.1	3
BP	GO:0007531	mating type determination	3/358	31/3915	0.548987	0.967231	0.967231	XP_031075968.1/XP_031083817.1/XP_031087419.1	3
BP	GO:0019740	nitrogen utilization	3/358	31/3915	0.548987	0.967231	0.967231	XP_031080117.1/XP_031082916.1/XP_031081700.1	3
BP	GO:0045165	cell fate commitment	3/358	31/3915	0.548987	0.967231	0.967231	XP_031075968.1/XP_031083817.1/XP_031087419.1	3
BP	GO:0046364	monosaccharide biosynthetic process	3/358	31/3915	0.548987	0.967231	0.967231	XP_031080120.1/XP_031079702.1/XP_031083555.1	3
BP	GO:0051348	negative regulation of transferase activity	3/358	31/3915	0.548987	0.967231	0.967231	XP_031076102.1/XP_031080828.1/XP_031083543.1	3
BP	GO:0070592	cell wall polysaccharide biosynthetic process	3/358	31/3915	0.548987	0.967231	0.967231	XP_031075652.1/XP_031078995.1/XP_031083732.1	3
BP	GO:1902975	mitotic DNA replication initiation	3/358	31/3915	0.548987	0.967231	0.967231	XP_031083571.1/XP_031087542.1/XP_031086974.1	3
MF	GO:0016903	oxidoreductase activity, acting on the aldehyde or oxo group of donors	3/310	31/3385	0.550162	0.932611	0.932611	XP_031074995.1/XP_031089689.1/XP_031082671.1	3
BP	GO:0006261	DNA-templated DNA replication	13/358	143/3915	0.553058	0.967231	0.967231	XP_031076045.1/XP_031075829.1/XP_031077200.1/XP_031077189.1/XP_031089054.1/XP_031080695.1/XP_031080895.1/XP_031083817.1/XP_031083571.1/XP_031087411.1/XP_031087419.1/XP_031087542.1/XP_031086974.1	13
BP	GO:0009272	fungal-type cell wall biogenesis	6/358	65/3915	0.553841	0.967231	0.967231	XP_031077613.1/XP_031080296.1/XP_031078995.1/XP_031083732.1/XP_031086989.1/XP_031088783.1	6
BP	GO:0061919	process utilizing autophagic mechanism	12/358	132/3915	0.554329	0.967231	0.967231	XP_031075982.1/XP_031075356.1/XP_031075138.1/XP_031077138.1/XP_031076958.1/XP_031079045.1/XP_031087597.1/XP_031089719.1/XP_031086970.1/XP_031087019.1/XP_031088783.1/XP_031089001.1	12
BP	GO:0010033	response to organic substance	22/358	243/3915	0.555114	0.967231	0.967231	XP_031075779.1/XP_031075320.1/XP_031077854.1/XP_031077138.1/XP_031080117.1/XP_031080598.1/XP_031080695.1/XP_031080828.1/XP_031079334.1/XP_031078995.1/XP_031083765.1/XP_031083630.1/XP_031083543.1/XP_031082513.1/XP_031082916.1/XP_031081529.1/XP_031081814.1/XP_031081869.1/XP_031086811.1/XP_031086970.1/XP_031086989.1/XP_031088318.1	22
CC	GO:0005795	Golgi stack	2/343	20/3769	0.55527	0.964699	0.964699	XP_031077362.1/XP_031089001.1	2
CC	GO:0071011	precatalytic spliceosome	2/343	20/3769	0.55527	0.964699	0.964699	XP_031075829.1/XP_031075383.1	2
CC	GO:0097346	INO80-type complex	2/343	20/3769	0.55527	0.964699	0.964699	XP_031076197.1/XP_031080076.1	2
BP	GO:1901987	regulation of cell cycle phase transition	18/358	199/3915	0.557873	0.967231	0.967231	XP_031076249.1/XP_031076045.1/XP_031075390.1/XP_031075320.1/XP_031074765.1/XP_031077760.1/XP_031080123.1/XP_031080695.1/XP_031079334.1/XP_031083571.1/XP_031087419.1/XP_031087601.1/XP_031083242.1/XP_031081814.1/XP_031081824.1/XP_031081869.1/XP_031082013.1/XP_031088119.1	18
BP	GO:0006220	pyrimidine nucleotide metabolic process	2/358	20/3915	0.557964	0.967231	0.967231	XP_031077656.1/XP_031083555.1	2
BP	GO:0006221	pyrimidine nucleotide biosynthetic process	2/358	20/3915	0.557964	0.967231	0.967231	XP_031077656.1/XP_031083555.1	2
BP	GO:0006283	transcription-coupled nucleotide-excision repair	2/358	20/3915	0.557964	0.967231	0.967231	XP_031077753.1/XP_031080635.1	2
BP	GO:0006813	potassium ion transport	2/358	20/3915	0.557964	0.967231	0.967231	XP_031088002.1/XP_031084712.1	2
BP	GO:0034762	regulation of transmembrane transport	2/358	20/3915	0.557964	0.967231	0.967231	XP_031080123.1/XP_031085409.1	2
BP	GO:0045010	actin nucleation	2/358	20/3915	0.557964	0.967231	0.967231	XP_031082939.1/XP_031088783.1	2
BP	GO:0051278	fungal-type cell wall polysaccharide biosynthetic process	2/358	20/3915	0.557964	0.967231	0.967231	XP_031078995.1/XP_031083732.1	2
BP	GO:0071940	fungal-type cell wall assembly	2/358	20/3915	0.557964	0.967231	0.967231	XP_031077613.1/XP_031088783.1	2
BP	GO:1900443	regulation of filamentous growth of a population of unicellular organisms in response to biotic stimulus	2/358	20/3915	0.557964	0.967231	0.967231	XP_031083543.1/XP_031081814.1	2
CC	GO:0005768	endosome	12/343	133/3769	0.558399	0.964699	0.964699	XP_031076272.1/XP_031077362.1/XP_031077288.1/XP_031079951.1/XP_031080222.1/XP_031080871.1/XP_031079696.1/XP_031079142.1/XP_031079008.1/XP_031087591.1/XP_031081891.1/XP_031089001.1	12
MF	GO:0008194	UDP-glycosyltransferase activity	2/310	20/3385	0.558906	0.932611	0.932611	XP_031080514.1/XP_031078995.1	2
CC	GO:1904949	ATPase complex	4/343	43/3769	0.559113	0.964699	0.964699	XP_031076197.1/XP_031077810.1/XP_031080076.1/XP_031087411.1	4
BP	GO:0043414	macromolecule methylation	9/358	99/3915	0.559646	0.967231	0.967231	XP_031075968.1/XP_031075320.1/XP_031077753.1/XP_031080635.1/XP_031079223.1/XP_031084345.1/XP_031081529.1/XP_031082064.1/XP_031086923.1	9
BP	GO:1901698	response to nitrogen compound	9/358	99/3915	0.559646	0.967231	0.967231	XP_031079334.1/XP_031078995.1/XP_031083765.1/XP_031087758.1/XP_031082513.1/XP_031082916.1/XP_031081529.1/XP_031086970.1/XP_031086989.1	9
MF	GO:0003723	RNA binding	39/310	431/3385	0.561923	0.932611	0.932611	XP_031076062.1/XP_031076000.1/XP_031075875.1/XP_031075508.1/XP_031075445.1/XP_031075383.1/XP_031075015.1/XP_031074813.1/XP_031074691.1/XP_031077900.1/XP_031077760.1/XP_031077730.1/XP_031077430.1/XP_031077138.1/XP_031076955.1/XP_031079936.1/XP_031080153.1/XP_031080202.1/XP_031080230.1/XP_031080493.1/XP_031080834.1/XP_031079334.1/XP_031079233.1/XP_031079174.1/XP_031083956.1/XP_031087527.1/XP_031087…	39
BP	GO:0008204	ergosterol metabolic process	4/358	43/3915	0.563025	0.967231	0.967231	XP_031077765.1/XP_031077586.1/XP_031080872.1/XP_031088960.1	4
BP	GO:0016128	phytosteroid metabolic process	4/358	43/3915	0.563025	0.967231	0.967231	XP_031077765.1/XP_031077586.1/XP_031080872.1/XP_031088960.1	4
BP	GO:0045927	positive regulation of growth	4/358	43/3915	0.563025	0.967231	0.967231	XP_031076272.1/XP_031075541.1/XP_031075320.1/XP_031081814.1	4
BP	GO:0072507	divalent inorganic cation homeostasis	4/358	43/3915	0.563025	0.967231	0.967231	XP_031075212.1/XP_031077076.1/XP_031079915.1/XP_031088002.1	4
BP	GO:1903508	positive regulation of nucleic acid-templated transcription	22/358	244/3915	0.56336	0.967231	0.967231	XP_031075808.1/XP_031075534.1/XP_031075320.1/XP_031074816.1/XP_031074691.1/XP_031077988.1/XP_031077854.1/XP_031077810.1/XP_031077753.1/XP_031077424.1/XP_031077249.1/XP_031076955.1/XP_031076726.1/XP_031080635.1/XP_031084058.1/XP_031083555.1/XP_031082799.1/XP_031082893.1/XP_031082916.1/XP_031081872.1/XP_031088031.1/XP_031088297.1	22
MF	GO:0030674	protein-macromolecule adaptor activity	8/310	88/3385	0.564205	0.932611	0.932611	XP_031075385.1/XP_031075082.1/XP_031077613.1/XP_031079951.1/XP_031080895.1/XP_031083571.1/XP_031081510.1/XP_031085409.1	8
MF	GO:0004519	endonuclease activity	4/310	43/3385	0.564414	0.932611	0.932611	XP_031076249.1/XP_031077189.1/XP_031080826.1/XP_031082064.1	4
BP	GO:0044419	biological process involved in interspecies interaction between organisms	12/358	133/3915	0.565319	0.967231	0.967231	XP_031076272.1/XP_031075541.1/XP_031075320.1/XP_031078792.1/XP_031087597.1/XP_031082568.1/XP_031082916.1/XP_031081814.1/XP_031081891.1/XP_031086989.1/XP_031088960.1/XP_031088325.1	12
MF	GO:0008092	cytoskeletal protein binding	7/310	77/3385	0.567196	0.932611	0.932611	XP_031075082.1/XP_031074871.1/XP_031077574.1/XP_031080052.1/XP_031080899.1/XP_031087591.1/XP_031087601.1	7
MF	GO:0016757	glycosyltransferase activity	7/310	77/3385	0.567196	0.932611	0.932611	XP_031078096.1/XP_031077731.1/XP_031077349.1/XP_031080514.1/XP_031079352.1/XP_031078995.1/XP_031088982.1	7
BP	GO:0032101	regulation of response to external stimulus	6/358	66/3915	0.569282	0.967231	0.967231	XP_031075320.1/XP_031077249.1/XP_031080828.1/XP_031079334.1/XP_031083543.1/XP_031082916.1	6
BP	GO:0006839	mitochondrial transport	10/358	111/3915	0.569528	0.967231	0.967231	XP_031075015.1/XP_031077325.1/XP_031080824.1/XP_031080915.1/XP_031079489.1/XP_031087564.1/XP_031083105.1/XP_031081426.1/XP_031082027.1/XP_031086937.1	10
CC	GO:0097525	spliceosomal snRNP complex	5/343	55/3769	0.570123	0.964699	0.964699	XP_031075769.1/XP_031075383.1/XP_031077430.1/XP_031080202.1/XP_031087072.1	5
MF	GO:0000166	nucleotide binding	31/310	344/3385	0.570299	0.932611	0.932611	XP_031076045.1/XP_031075974.1/XP_031075629.1/XP_031075320.1/XP_031075268.1/XP_031075017.1/XP_031075015.1/XP_031074995.1/XP_031074813.1/XP_031074765.1/XP_031077889.1/XP_031077724.1/XP_031077603.1/XP_031077189.1/XP_031077138.1/XP_031076636.1/XP_031080834.1/XP_031080861.1/XP_031080872.1/XP_031079334.1/XP_031079044.1/XP_031083630.1/XP_031083543.1/XP_031087711.1/XP_031082568.1/XP_031082989.1/XP_031081…	31
MF	GO:1901265	nucleoside phosphate binding	31/310	344/3385	0.570299	0.932611	0.932611	XP_031076045.1/XP_031075974.1/XP_031075629.1/XP_031075320.1/XP_031075268.1/XP_031075017.1/XP_031075015.1/XP_031074995.1/XP_031074813.1/XP_031074765.1/XP_031077889.1/XP_031077724.1/XP_031077603.1/XP_031077189.1/XP_031077138.1/XP_031076636.1/XP_031080834.1/XP_031080861.1/XP_031080872.1/XP_031079334.1/XP_031079044.1/XP_031083630.1/XP_031083543.1/XP_031087711.1/XP_031082568.1/XP_031082989.1/XP_031081…	31
BP	GO:0007000	nucleolus organization	3/358	32/3915	0.571115	0.967231	0.967231	XP_031080635.1/XP_031087597.1/XP_031082893.1	3
BP	GO:0019363	pyridine nucleotide biosynthetic process	3/358	32/3915	0.571115	0.967231	0.967231	XP_031075629.1/XP_031077138.1/XP_031079702.1	3
BP	GO:0022904	respiratory electron transport chain	3/358	32/3915	0.571115	0.967231	0.967231	XP_031074933.1/XP_031082860.1/XP_031081426.1	3
BP	GO:0042326	negative regulation of phosphorylation	3/358	32/3915	0.571115	0.967231	0.967231	XP_031076102.1/XP_031080828.1/XP_031083543.1	3
BP	GO:0070192	chromosome organization involved in meiotic cell cycle	3/358	32/3915	0.571115	0.967231	0.967231	XP_031075968.1/XP_031075215.1/XP_031087641.1	3
BP	GO:0097164	ammonium ion metabolic process	3/358	32/3915	0.571115	0.967231	0.967231	XP_031078681.1/XP_031082994.1/XP_031081977.1	3
BP	GO:0098869	cellular oxidant detoxification	3/358	32/3915	0.571115	0.967231	0.967231	XP_031078792.1/XP_031078697.1/XP_031083342.1	3
MF	GO:0140097	catalytic activity, acting on DNA	10/310	111/3385	0.571837	0.932611	0.932611	XP_031076249.1/XP_031075445.1/XP_031075200.1/XP_031077189.1/XP_031079022.1/XP_031083817.1/XP_031087411.1/XP_031087542.1/XP_031082064.1/XP_031089003.1	10
BP	GO:0032940	secretion by cell	5/358	55/3915	0.574514	0.967231	0.967231	XP_031079951.1/XP_031080180.1/XP_031080315.1/XP_031084018.1/XP_031081814.1	5
BP	GO:0046903	secretion	5/358	55/3915	0.574514	0.967231	0.967231	XP_031079951.1/XP_031080180.1/XP_031080315.1/XP_031084018.1/XP_031081814.1	5
BP	GO:0033260	nuclear DNA replication	8/358	89/3915	0.575458	0.967231	0.967231	XP_031077189.1/XP_031089054.1/XP_031083817.1/XP_031083571.1/XP_031087411.1/XP_031087419.1/XP_031087542.1/XP_031086974.1	8
BP	GO:0043604	amide biosynthetic process	40/358	445/3915	0.575537	0.967231	0.967231	XP_031076272.1/XP_031075875.1/XP_031075775.1/XP_031075541.1/XP_031075445.1/XP_031075015.1/XP_031074928.1/XP_031074813.1/XP_031077900.1/XP_031077854.1/XP_031077760.1/XP_031077623.1/XP_031077291.1/XP_031077249.1/XP_031077235.1/XP_031076955.1/XP_031076636.1/XP_031079936.1/XP_031080135.1/XP_031080493.1/XP_031080661.1/XP_031079500.1/XP_031079474.1/XP_031079462.1/XP_031079334.1/XP_031079233.1/XP_031079…	40
MF	GO:0016407	acetyltransferase activity	5/310	55/3385	0.576095	0.932611	0.932611	XP_031075138.1/XP_031074392.1/XP_031078929.1/XP_031078681.1/XP_031082799.1	5
MF	GO:0004674	protein serine/threonine kinase activity	8/310	89/3385	0.577508	0.932611	0.932611	XP_031076045.1/XP_031075320.1/XP_031074765.1/XP_031080452.1/XP_031079334.1/XP_031083630.1/XP_031089703.1/XP_031081471.1	8
MF	GO:0060090	molecular adaptor activity	8/310	89/3385	0.577508	0.932611	0.932611	XP_031075385.1/XP_031075082.1/XP_031077613.1/XP_031079951.1/XP_031080895.1/XP_031083571.1/XP_031081510.1/XP_031085409.1	8
BP	GO:0000747	conjugation with cellular fusion	11/358	123/3915	0.578587	0.967231	0.967231	XP_031075320.1/XP_031075193.1/XP_031075082.1/XP_031074765.1/XP_031077854.1/XP_031080598.1/XP_031079610.1/XP_031082916.1/XP_031081814.1/XP_031081869.1/XP_031081928.1	11
BP	GO:0006643	membrane lipid metabolic process	7/358	78/3915	0.57944	0.967231	0.967231	XP_031075320.1/XP_031080038.1/XP_031079482.1/XP_031081729.1/XP_031086989.1/XP_031088871.1/XP_031088325.1	7
MF	GO:0032553	ribonucleotide binding	27/310	301/3385	0.579467	0.932611	0.932611	XP_031076045.1/XP_031075974.1/XP_031075320.1/XP_031075268.1/XP_031075017.1/XP_031075015.1/XP_031074813.1/XP_031074765.1/XP_031077724.1/XP_031077603.1/XP_031077189.1/XP_031077138.1/XP_031076636.1/XP_031080834.1/XP_031080861.1/XP_031079334.1/XP_031079044.1/XP_031083630.1/XP_031083543.1/XP_031087711.1/XP_031082568.1/XP_031082989.1/XP_031081471.1/XP_031081674.1/XP_031081814.1/XP_031088783.1/XP_031089…	27
BP	GO:0000096	sulfur amino acid metabolic process	4/358	44/3915	0.581752	0.967231	0.967231	XP_031075268.1/XP_031077257.1/XP_031080639.1/XP_031083027.1	4
BP	GO:0009067	aspartate family amino acid biosynthetic process	4/358	44/3915	0.581752	0.967231	0.967231	XP_031075183.1/XP_031077592.1/XP_031077257.1/XP_031083566.1	4
BP	GO:0016126	sterol biosynthetic process	4/358	44/3915	0.581752	0.967231	0.967231	XP_031077765.1/XP_031077586.1/XP_031080872.1/XP_031088960.1	4
BP	GO:0022900	electron transport chain	4/358	44/3915	0.581752	0.967231	0.967231	XP_031074933.1/XP_031080026.1/XP_031082860.1/XP_031081426.1	4
CC	GO:0098797	plasma membrane protein complex	2/343	21/3769	0.582378	0.964699	0.964699	XP_031077596.1/XP_031079299.1	2
CC	GO:0005635	nuclear envelope	8/343	90/3769	0.58298	0.964699	0.964699	XP_031075508.1/XP_031075215.1/XP_031074809.1/XP_031079610.1/XP_031084047.1/XP_031087352.1/XP_031081674.1/XP_031081814.1	8
BP	GO:0030010	establishment of cell polarity	6/358	67/3915	0.584461	0.967231	0.967231	XP_031075082.1/XP_031077613.1/XP_031080695.1/XP_031080899.1/XP_031083630.1/XP_031081814.1	6
BP	GO:0000028	ribosomal small subunit assembly	2/358	21/3915	0.58508	0.967231	0.967231	XP_031075508.1/XP_031080598.1	2
BP	GO:0015868	purine ribonucleotide transport	2/358	21/3915	0.58508	0.967231	0.967231	XP_031079489.1/XP_031082574.1	2
BP	GO:0030100	regulation of endocytosis	2/358	21/3915	0.58508	0.967231	0.967231	XP_031083630.1/XP_031085409.1	2
BP	GO:0032185	septin cytoskeleton organization	2/358	21/3915	0.58508	0.967231	0.967231	XP_031082978.1/XP_031081814.1	2
BP	GO:0034501	protein localization to kinetochore	2/358	21/3915	0.58508	0.967231	0.967231	XP_031075390.1/XP_031080695.1	2
BP	GO:0042244	spore wall assembly	2/358	21/3915	0.58508	0.967231	0.967231	XP_031077613.1/XP_031088783.1	2
BP	GO:0045835	negative regulation of meiotic nuclear division	2/358	21/3915	0.58508	0.967231	0.967231	XP_031076045.1/XP_031083817.1	2
BP	GO:0046580	negative regulation of Ras protein signal transduction	2/358	21/3915	0.58508	0.967231	0.967231	XP_031075193.1/XP_031083543.1	2
BP	GO:0051503	adenine nucleotide transport	2/358	21/3915	0.58508	0.967231	0.967231	XP_031079489.1/XP_031082574.1	2
BP	GO:0070784	regulation of growth of unicellular organism as a thread of attached cells	2/358	21/3915	0.58508	0.967231	0.967231	XP_031077765.1/XP_031081814.1	2
BP	GO:0071966	fungal-type cell wall polysaccharide metabolic process	2/358	21/3915	0.58508	0.967231	0.967231	XP_031078995.1/XP_031083732.1	2
BP	GO:1902407	assembly of actomyosin apparatus involved in mitotic cytokinesis	2/358	21/3915	0.58508	0.967231	0.967231	XP_031080695.1/XP_031082939.1	2
BP	GO:1903083	protein localization to condensed chromosome	2/358	21/3915	0.58508	0.967231	0.967231	XP_031075390.1/XP_031080695.1	2
BP	GO:1903475	mitotic actomyosin contractile ring assembly	2/358	21/3915	0.58508	0.967231	0.967231	XP_031080695.1/XP_031082939.1	2
BP	GO:2000769	regulation of establishment or maintenance of cell polarity regulating cell shape	2/358	21/3915	0.58508	0.967231	0.967231	XP_031080695.1/XP_031081814.1	2
MF	GO:0030544	Hsp70 protein binding	2/310	21/3385	0.586037	0.932611	0.932611	XP_031077563.1/XP_031077522.1	2
MF	GO:0043022	ribosome binding	2/310	21/3385	0.586037	0.932611	0.932611	XP_031077760.1/XP_031077522.1	2
MF	GO:0060590	ATPase regulator activity	2/310	21/3385	0.586037	0.932611	0.932611	XP_031077563.1/XP_031077216.1	2
MF	GO:1902936	phosphatidylinositol bisphosphate binding	2/310	21/3385	0.586037	0.932611	0.932611	XP_031087597.1/XP_031089001.1	2
BP	GO:0046700	heterocycle catabolic process	16/358	180/3915	0.588158	0.967231	0.967231	XP_031076197.1/XP_031076062.1/XP_031075629.1/XP_031075445.1/XP_031075120.1/XP_031077854.1/XP_031077291.1/XP_031077189.1/XP_031077138.1/XP_031076955.1/XP_031080828.1/XP_031079702.1/XP_031079462.1/XP_031079233.1/XP_031079062.1/XP_031082412.1	16
BP	GO:0070647	protein modification by small protein conjugation or removal	16/358	180/3915	0.588158	0.967231	0.967231	XP_031076094.1/XP_031075198.1/XP_031077854.1/XP_031077753.1/XP_031077286.1/XP_031079951.1/XP_031080052.1/XP_031080135.1/XP_031080635.1/XP_031080895.1/XP_031083765.1/XP_031087641.1/XP_031089719.1/XP_031081872.1/XP_031082013.1/XP_031087977.1	16
BP	GO:1901135	carbohydrate derivative metabolic process	29/358	325/3915	0.588317	0.967231	0.967231	XP_031076323.1/XP_031075652.1/XP_031075629.1/XP_031074933.1/XP_031078096.1/XP_031077889.1/XP_031077731.1/XP_031077656.1/XP_031077586.1/XP_031077506.1/XP_031077138.1/XP_031080828.1/XP_031079702.1/XP_031079474.1/XP_031079062.1/XP_031078995.1/XP_031087453.1/XP_031089689.1/XP_031082436.1/XP_031083026.1/XP_031081426.1/XP_031081548.1/XP_031081674.1/XP_031082090.1/XP_031086811.1/XP_031086989.1/XP_031088…	29
BP	GO:0040008	regulation of growth	8/358	90/3915	0.588556	0.967231	0.967231	XP_031076272.1/XP_031075541.1/XP_031075320.1/XP_031077765.1/XP_031076958.1/XP_031083543.1/XP_031087533.1/XP_031081814.1	8
BP	GO:0044786	cell cycle DNA replication	8/358	90/3915	0.588556	0.967231	0.967231	XP_031077189.1/XP_031089054.1/XP_031083817.1/XP_031083571.1/XP_031087411.1/XP_031087419.1/XP_031087542.1/XP_031086974.1	8
BP	GO:2000243	positive regulation of reproductive process	8/358	90/3915	0.588556	0.967231	0.967231	XP_031075193.1/XP_031077854.1/XP_031080222.1/XP_031080598.1/XP_031079610.1/XP_031081814.1/XP_031081869.1/XP_031088031.1	8
CC	GO:0030134	COPII-coated ER to Golgi transport vesicle	3/343	33/3769	0.589205	0.964699	0.964699	XP_031075385.1/XP_031084018.1/XP_031086970.1	3
CC	GO:0030662	coated vesicle membrane	3/343	33/3769	0.589205	0.964699	0.964699	XP_031077596.1/XP_031079142.1/XP_031086970.1	3
CC	GO:0070603	SWI/SNF superfamily-type complex	3/343	33/3769	0.589205	0.964699	0.964699	XP_031076197.1/XP_031077810.1/XP_031080076.1	3
BP	GO:0016042	lipid catabolic process	5/358	56/3915	0.591018	0.967231	0.967231	XP_031076323.1/XP_031076028.1/XP_031074564.1/XP_031078906.1/XP_031086048.1	5
BP	GO:0036503	ERAD pathway	5/358	56/3915	0.591018	0.967231	0.967231	XP_031078995.1/XP_031083765.1/XP_031082513.1/XP_031086970.1/XP_031086989.1	5
BP	GO:0032268	regulation of cellular protein metabolic process	26/358	292/3915	0.591076	0.967231	0.967231	XP_031076102.1/XP_031075968.1/XP_031075779.1/XP_031075445.1/XP_031075082.1/XP_031077854.1/XP_031077753.1/XP_031077200.1/XP_031076955.1/XP_031080135.1/XP_031080493.1/XP_031080635.1/XP_031080695.1/XP_031080828.1/XP_031079334.1/XP_031083956.1/XP_031083543.1/XP_031087352.1/XP_031087419.1/XP_031087641.1/XP_031087729.1/XP_031081471.1/XP_031081529.1/XP_031082013.1/XP_031087981.1/XP_031088119.1	26
BP	GO:0006754	ATP biosynthetic process	3/358	33/3915	0.59256	0.967231	0.967231	XP_031075629.1/XP_031077138.1/XP_031079702.1	3
BP	GO:0016237	lysosomal microautophagy	3/358	33/3915	0.59256	0.967231	0.967231	XP_031075982.1/XP_031077138.1/XP_031089001.1	3
BP	GO:0043094	cellular metabolic compound salvage	3/358	33/3915	0.59256	0.967231	0.967231	XP_031075911.1/XP_031076726.1/XP_031082436.1	3
BP	GO:0051447	negative regulation of meiotic cell cycle	3/358	33/3915	0.59256	0.967231	0.967231	XP_031076045.1/XP_031083817.1/XP_031083543.1	3
BP	GO:0006623	protein targeting to vacuole	7/358	79/3915	0.593351	0.967231	0.967231	XP_031075417.1/XP_031075356.1/XP_031079045.1/XP_031087591.1/XP_031087110.1/XP_031088783.1/XP_031089001.1	7
MF	GO:0008237	metallopeptidase activity	3/310	33/3385	0.593765	0.932611	0.932611	XP_031074933.1/XP_031080803.1/XP_031079610.1	3
MF	GO:0043168	anion binding	38/310	425/3385	0.594184	0.932611	0.932611	XP_031076045.1/XP_031075974.1/XP_031075320.1/XP_031075268.1/XP_031075017.1/XP_031075015.1/XP_031074813.1/XP_031074765.1/XP_031077724.1/XP_031077603.1/XP_031077288.1/XP_031077189.1/XP_031077138.1/XP_031076636.1/XP_031080026.1/XP_031080639.1/XP_031080661.1/XP_031080834.1/XP_031080861.1/XP_031079334.1/XP_031079044.1/XP_031084212.1/XP_031084047.1/XP_031083630.1/XP_031083543.1/XP_031087597.1/XP_031087…	38
CC	GO:0009986	cell surface	6/343	68/3769	0.594569	0.964699	0.964699	XP_031075883.1/XP_031078096.1/XP_031077871.1/XP_031083732.1/XP_031083572.1/XP_031082568.1	6
BP	GO:0006260	DNA replication	13/358	147/3915	0.594816	0.967231	0.967231	XP_031076045.1/XP_031075829.1/XP_031077200.1/XP_031077189.1/XP_031089054.1/XP_031080695.1/XP_031080895.1/XP_031083817.1/XP_031083571.1/XP_031087411.1/XP_031087419.1/XP_031087542.1/XP_031086974.1	13
MF	GO:0016773	phosphotransferase activity, alcohol group as acceptor	14/310	158/3385	0.595178	0.932611	0.932611	XP_031076045.1/XP_031075320.1/XP_031074765.1/XP_031077138.1/XP_031080452.1/XP_031080665.1/XP_031079334.1/XP_031083630.1/XP_031087352.1/XP_031089703.1/XP_031081471.1/XP_031081674.1/XP_031086975.1/XP_031088206.1	14
BP	GO:0072657	protein localization to membrane	9/358	102/3915	0.596884	0.967231	0.967231	XP_031077816.1/XP_031080190.1/XP_031080315.1/XP_031079008.1/XP_031087564.1/XP_031083060.1/XP_031083105.1/XP_031081426.1/XP_031081977.1	9
BP	GO:0045893	positive regulation of DNA-templated transcription	21/358	237/3915	0.597258	0.967231	0.967231	XP_031075808.1/XP_031075534.1/XP_031075320.1/XP_031074691.1/XP_031077988.1/XP_031077854.1/XP_031077810.1/XP_031077753.1/XP_031077424.1/XP_031077249.1/XP_031076955.1/XP_031076726.1/XP_031080635.1/XP_031084058.1/XP_031083555.1/XP_031082799.1/XP_031082893.1/XP_031082916.1/XP_031081872.1/XP_031088031.1/XP_031088297.1	21
BP	GO:0031331	positive regulation of cellular catabolic process	12/358	136/3915	0.597634	0.967231	0.967231	XP_031075445.1/XP_031077854.1/XP_031077291.1/XP_031077138.1/XP_031076955.1/XP_031080135.1/XP_031079462.1/XP_031079233.1/XP_031082412.1/XP_031081824.1/XP_031082013.1/XP_031087019.1	12
BP	GO:0006081	cellular aldehyde metabolic process	4/358	45/3915	0.600012	0.967231	0.967231	XP_031075629.1/XP_031079702.1/XP_031083555.1/XP_031086811.1	4
BP	GO:0006694	steroid biosynthetic process	4/358	45/3915	0.600012	0.967231	0.967231	XP_031077765.1/XP_031077586.1/XP_031080872.1/XP_031088960.1	4
BP	GO:0018022	peptidyl-lysine methylation	4/358	45/3915	0.600012	0.967231	0.967231	XP_031075968.1/XP_031077753.1/XP_031080635.1/XP_031081529.1	4
BP	GO:0044107	cellular alcohol metabolic process	4/358	45/3915	0.600012	0.967231	0.967231	XP_031077765.1/XP_031077586.1/XP_031080872.1/XP_031088960.1	4
BP	GO:0080134	regulation of response to stress	11/358	125/3915	0.600859	0.967231	0.967231	XP_031075445.1/XP_031075320.1/XP_031077753.1/XP_031077249.1/XP_031080635.1/XP_031080828.1/XP_031079334.1/XP_031083817.1/XP_031083543.1/XP_031087641.1/XP_031088119.1	11
BP	GO:0042273	ribosomal large subunit biogenesis	8/358	91/3915	0.601459	0.967231	0.967231	XP_031077602.1/XP_031077225.1/XP_031080834.1/XP_031079223.1/XP_031079174.1/XP_031087645.1/XP_031087711.1/XP_031081510.1	8
BP	GO:0030447	filamentous growth	18/358	204/3915	0.602377	0.967231	0.967231	XP_031076272.1/XP_031075883.1/XP_031075541.1/XP_031075320.1/XP_031075082.1/XP_031077765.1/XP_031077505.1/XP_031080117.1/XP_031080296.1/XP_031078792.1/XP_031083543.1/XP_031087453.1/XP_031087533.1/XP_031087597.1/XP_031081814.1/XP_031081869.1/XP_031081891.1/XP_031088325.1	18
BP	GO:0009896	positive regulation of catabolic process	12/358	137/3915	0.608166	0.967231	0.967231	XP_031075445.1/XP_031077854.1/XP_031077291.1/XP_031077138.1/XP_031076955.1/XP_031080135.1/XP_031079462.1/XP_031079233.1/XP_031082412.1/XP_031081824.1/XP_031082013.1/XP_031087019.1	12
CC	GO:0009898	cytoplasmic side of plasma membrane	2/343	22/3769	0.608251	0.964699	0.964699	XP_031075541.1/XP_031081814.1	2
BP	GO:0009451	RNA modification	9/358	103/3915	0.60896	0.967231	0.967231	XP_031075320.1/XP_031077506.1/XP_031077072.1/XP_031080052.1/XP_031080712.1/XP_031079223.1/XP_031084345.1/XP_031082064.1/XP_031086923.1	9
CC	GO:0098791	Golgi apparatus subcompartment	10/343	115/3769	0.609798	0.964699	0.964699	XP_031077362.1/XP_031079915.1/XP_031080222.1/XP_031080598.1/XP_031084018.1/XP_031087453.1/XP_031081977.1/XP_031086927.1/XP_031088892.1/XP_031089001.1	10
CC	GO:0031097	medial cortex	3/343	34/3769	0.609961	0.964699	0.964699	XP_031079044.1/XP_031082939.1/XP_031083015.1	3
BP	GO:0002831	regulation of response to biotic stimulus	2/358	22/3915	0.610949	0.967231	0.967231	XP_031083543.1/XP_031081814.1	2
BP	GO:0006369	termination of RNA polymerase II transcription	2/358	22/3915	0.610949	0.967231	0.967231	XP_031080695.1/XP_031086938.1	2
BP	GO:0006739	NADP metabolic process	2/358	22/3915	0.610949	0.967231	0.967231	XP_031075629.1/XP_031079702.1	2
BP	GO:0006857	oligopeptide transport	2/358	22/3915	0.610949	0.967231	0.967231	XP_031079696.1/XP_031086937.1	2
BP	GO:0009651	response to salt stress	2/358	22/3915	0.610949	0.967231	0.967231	XP_031077889.1/XP_031076958.1	2
BP	GO:0015865	purine nucleotide transport	2/358	22/3915	0.610949	0.967231	0.967231	XP_031079489.1/XP_031082574.1	2
BP	GO:0016241	regulation of macroautophagy	2/358	22/3915	0.610949	0.967231	0.967231	XP_031077138.1/XP_031087019.1	2
BP	GO:0019646	aerobic electron transport chain	2/358	22/3915	0.610949	0.967231	0.967231	XP_031074933.1/XP_031081426.1	2
BP	GO:0030488	tRNA methylation	2/358	22/3915	0.610949	0.967231	0.967231	XP_031075320.1/XP_031082064.1	2
BP	GO:0032006	regulation of TOR signaling	2/358	22/3915	0.610949	0.967231	0.967231	XP_031080123.1/XP_031079500.1	2
BP	GO:0044088	regulation of vacuole organization	2/358	22/3915	0.610949	0.967231	0.967231	XP_031087591.1/XP_031081814.1	2
BP	GO:0045834	positive regulation of lipid metabolic process	2/358	22/3915	0.610949	0.967231	0.967231	XP_031079008.1/XP_031083915.1	2
BP	GO:0051058	negative regulation of small GTPase mediated signal transduction	2/358	22/3915	0.610949	0.967231	0.967231	XP_031075193.1/XP_031083543.1	2
BP	GO:0071407	cellular response to organic cyclic compound	2/358	22/3915	0.610949	0.967231	0.967231	XP_031079334.1/XP_031081529.1	2
BP	GO:1903438	positive regulation of mitotic cytokinetic process	2/358	22/3915	0.610949	0.967231	0.967231	XP_031075390.1/XP_031080695.1	2
BP	GO:1903490	positive regulation of mitotic cytokinesis	2/358	22/3915	0.610949	0.967231	0.967231	XP_031075390.1/XP_031080695.1	2
MF	GO:0016620	oxidoreductase activity, acting on the aldehyde or oxo group of donors, NAD or NADP as acceptor	2/310	22/3385	0.611917	0.932611	0.932611	XP_031074995.1/XP_031082671.1	2
MF	GO:0016860	intramolecular oxidoreductase activity	2/310	22/3385	0.611917	0.932611	0.932611	XP_031076666.1/XP_031079702.1	2
MF	GO:0051536	iron-sulfur cluster binding	2/310	22/3385	0.611917	0.932611	0.932611	XP_031077249.1/XP_031082860.1	2
MF	GO:0051540	metal cluster binding	2/310	22/3385	0.611917	0.932611	0.932611	XP_031077249.1/XP_031082860.1	2
BP	GO:0000429	carbon catabolite regulation of transcription from RNA polymerase II promoter	3/358	34/3915	0.613301	0.967231	0.967231	XP_031077988.1/XP_031076726.1/XP_031083555.1	3
BP	GO:0006986	response to unfolded protein	3/358	34/3915	0.613301	0.967231	0.967231	XP_031075779.1/XP_031080695.1/XP_031078995.1	3
BP	GO:0007080	mitotic metaphase plate congression	3/358	34/3915	0.613301	0.967231	0.967231	XP_031075390.1/XP_031074871.1/XP_031080695.1	3
BP	GO:0009314	response to radiation	3/358	34/3915	0.613301	0.967231	0.967231	XP_031079334.1/XP_031087411.1/XP_031088119.1	3
BP	GO:0046578	regulation of Ras protein signal transduction	3/358	34/3915	0.613301	0.967231	0.967231	XP_031075390.1/XP_031075193.1/XP_031083543.1	3
MF	GO:0042277	peptide binding	3/310	34/3385	0.614516	0.932611	0.932611	XP_031075508.1/XP_031080661.1/XP_031080871.1	3
CC	GO:0010494	cytoplasmic stress granule	7/343	81/3769	0.615323	0.964699	0.964699	XP_031075875.1/XP_031075268.1/XP_031077900.1/XP_031077760.1/XP_031077235.1/XP_031079936.1/XP_031087729.1	7
CC	GO:0030140	trans-Golgi network transport vesicle	1/343	10/3769	0.615327	0.964699	0.964699	XP_031079142.1	1
CC	GO:0032221	Rpd3S/Clr6-CII complex	1/343	10/3769	0.615327	0.964699	0.964699	XP_031082893.1	1
MF	GO:0016747	acyltransferase activity, transferring groups other than amino-acyl groups	8/310	92/3385	0.616254	0.932611	0.932611	XP_031075138.1/XP_031074392.1/XP_031080038.1/XP_031078929.1/XP_031078681.1/XP_031082799.1/XP_031081729.1/XP_031086769.1	8
BP	GO:0000394	RNA splicing, via endonucleolytic cleavage and ligation	1/358	10/3915	0.61716	0.967231	0.967231	XP_031087352.1	1
BP	GO:0000710	meiotic mismatch repair	1/358	10/3915	0.61716	0.967231	0.967231	XP_031077603.1	1
BP	GO:0006276	plasmid maintenance	1/358	10/3915	0.61716	0.967231	0.967231	XP_031074871.1	1
BP	GO:0006549	isoleucine metabolic process	1/358	10/3915	0.61716	0.967231	0.967231	XP_031083772.1	1
BP	GO:0006904	vesicle docking involved in exocytosis	1/358	10/3915	0.61716	0.967231	0.967231	XP_031084018.1	1
BP	GO:0009085	lysine biosynthetic process	1/358	10/3915	0.61716	0.967231	0.967231	XP_031075183.1	1
BP	GO:0009218	pyrimidine ribonucleotide metabolic process	1/358	10/3915	0.61716	0.967231	0.967231	XP_031077656.1	1
BP	GO:0016114	terpenoid biosynthetic process	1/358	10/3915	0.61716	0.967231	0.967231	XP_031077586.1	1
BP	GO:0016925	protein sumoylation	1/358	10/3915	0.61716	0.967231	0.967231	XP_031087641.1	1
BP	GO:0030847	termination of RNA polymerase II transcription, exosome-dependent	1/358	10/3915	0.61716	0.967231	0.967231	XP_031080695.1	1
BP	GO:0031086	nuclear-transcribed mRNA catabolic process, deadenylation-independent decay	1/358	10/3915	0.61716	0.967231	0.967231	XP_031077854.1	1
BP	GO:0031365	N-terminal protein amino acid modification	1/358	10/3915	0.61716	0.967231	0.967231	XP_031075138.1	1
BP	GO:0031566	actomyosin contractile ring maintenance	1/358	10/3915	0.61716	0.967231	0.967231	XP_031075390.1	1
BP	GO:0032780	negative regulation of ATP-dependent activity	1/358	10/3915	0.61716	0.967231	0.967231	XP_031086974.1	1
BP	GO:0032951	regulation of beta-glucan biosynthetic process	1/358	10/3915	0.61716	0.967231	0.967231	XP_031081814.1	1
BP	GO:0033962	P-body assembly	1/358	10/3915	0.61716	0.967231	0.967231	XP_031082412.1	1
BP	GO:0034398	telomere tethering at nuclear periphery	1/358	10/3915	0.61716	0.967231	0.967231	XP_031075215.1	1
BP	GO:0034476	U5 snRNA 3'-end processing	1/358	10/3915	0.61716	0.967231	0.967231	XP_031079462.1	1
BP	GO:0034497	protein localization to phagophore assembly site	1/358	10/3915	0.61716	0.967231	0.967231	XP_031089001.1	1
BP	GO:0035306	positive regulation of dephosphorylation	1/358	10/3915	0.61716	0.967231	0.967231	XP_031080695.1	1
BP	GO:0035335	peptidyl-tyrosine dephosphorylation	1/358	10/3915	0.61716	0.967231	0.967231	XP_031075390.1	1
BP	GO:0036212	contractile ring maintenance	1/358	10/3915	0.61716	0.967231	0.967231	XP_031075390.1	1
BP	GO:0042939	tripeptide transport	1/358	10/3915	0.61716	0.967231	0.967231	XP_031079696.1	1
BP	GO:0043270	positive regulation of ion transport	1/358	10/3915	0.61716	0.967231	0.967231	XP_031080123.1	1
BP	GO:0044406	adhesion of symbiont to host	1/358	10/3915	0.61716	0.967231	0.967231	XP_031087597.1	1
BP	GO:0045836	positive regulation of meiotic nuclear division	1/358	10/3915	0.61716	0.967231	0.967231	XP_031088031.1	1
BP	GO:0046134	pyrimidine nucleoside biosynthetic process	1/358	10/3915	0.61716	0.967231	0.967231	XP_031077656.1	1
BP	GO:0051046	regulation of secretion	1/358	10/3915	0.61716	0.967231	0.967231	XP_031081814.1	1
BP	GO:0051093	negative regulation of developmental process	1/358	10/3915	0.61716	0.967231	0.967231	XP_031077816.1	1
BP	GO:0051240	positive regulation of multicellular organismal process	1/358	10/3915	0.61716	0.967231	0.967231	XP_031080222.1	1
BP	GO:0051260	protein homooligomerization	1/358	10/3915	0.61716	0.967231	0.967231	XP_031083817.1	1
BP	GO:0051643	endoplasmic reticulum localization	1/358	10/3915	0.61716	0.967231	0.967231	XP_031084047.1	1
BP	GO:0051988	regulation of attachment of spindle microtubules to kinetochore	1/358	10/3915	0.61716	0.967231	0.967231	XP_031075390.1	1
BP	GO:0072583	clathrin-dependent endocytosis	1/358	10/3915	0.61716	0.967231	0.967231	XP_031077596.1	1
BP	GO:0090054	regulation of silent mating-type cassette heterochromatin formation	1/358	10/3915	0.61716	0.967231	0.967231	XP_031082893.1	1
BP	GO:0090231	regulation of spindle checkpoint	1/358	10/3915	0.61716	0.967231	0.967231	XP_031080695.1	1
BP	GO:0090266	regulation of mitotic cell cycle spindle assembly checkpoint	1/358	10/3915	0.61716	0.967231	0.967231	XP_031080695.1	1
BP	GO:1903466	regulation of mitotic DNA replication initiation	1/358	10/3915	0.61716	0.967231	0.967231	XP_031083571.1	1
BP	GO:1903504	regulation of mitotic spindle checkpoint	1/358	10/3915	0.61716	0.967231	0.967231	XP_031080695.1	1
BP	GO:1903530	regulation of secretion by cell	1/358	10/3915	0.61716	0.967231	0.967231	XP_031081814.1	1
BP	GO:1905952	regulation of lipid localization	1/358	10/3915	0.61716	0.967231	0.967231	XP_031084047.1	1
BP	GO:2001023	regulation of response to drug	1/358	10/3915	0.61716	0.967231	0.967231	XP_031080123.1	1
BP	GO:0010383	cell wall polysaccharide metabolic process	4/358	46/3915	0.617786	0.967231	0.967231	XP_031075652.1/XP_031078096.1/XP_031078995.1/XP_031083732.1	4
MF	GO:0004402	histone acetyltransferase activity	1/310	10/3385	0.617808	0.932611	0.932611	XP_031082799.1	1
MF	GO:0004713	protein tyrosine kinase activity	1/310	10/3385	0.617808	0.932611	0.932611	XP_031083630.1	1
MF	GO:0004725	protein tyrosine phosphatase activity	1/310	10/3385	0.617808	0.932611	0.932611	XP_031075390.1	1
MF	GO:0005388	P-type calcium transporter activity	1/310	10/3385	0.617808	0.932611	0.932611	XP_031088002.1	1
MF	GO:0008198	ferrous iron binding	1/310	10/3385	0.617808	0.932611	0.932611	XP_031075445.1	1
MF	GO:0008235	metalloexopeptidase activity	1/310	10/3385	0.617808	0.932611	0.932611	XP_031080803.1	1
MF	GO:0019904	protein domain specific binding	1/310	10/3385	0.617808	0.932611	0.932611	XP_031084047.1	1
MF	GO:0020037	heme binding	1/310	10/3385	0.617808	0.932611	0.932611	XP_031078792.1	1
MF	GO:0046906	tetrapyrrole binding	1/310	10/3385	0.617808	0.932611	0.932611	XP_031078792.1	1
MF	GO:0061733	peptide-lysine-N-acetyltransferase activity	1/310	10/3385	0.617808	0.932611	0.932611	XP_031082799.1	1
MF	GO:0016301	kinase activity	16/310	183/3385	0.618914	0.932611	0.932611	XP_031076045.1/XP_031075320.1/XP_031074765.1/XP_031077586.1/XP_031077138.1/XP_031080452.1/XP_031080665.1/XP_031079334.1/XP_031083630.1/XP_031087352.1/XP_031089703.1/XP_031082647.1/XP_031081471.1/XP_031081674.1/XP_031086975.1/XP_031088206.1	16
BP	GO:0006367	transcription initiation at RNA polymerase II promoter	5/358	58/3915	0.622943	0.967231	0.967231	XP_031082859.1/XP_031081872.1/XP_031086838.1/XP_031089003.1/XP_031087981.1	5
BP	GO:0006473	protein acetylation	5/358	58/3915	0.622943	0.967231	0.967231	XP_031075138.1/XP_031074816.1/XP_031082799.1/XP_031081872.1/XP_031086838.1	5
MF	GO:0016772	transferase activity, transferring phosphorus-containing groups	22/310	251/3385	0.623344	0.932611	0.932611	XP_031076045.1/XP_031075320.1/XP_031075096.1/XP_031074765.1/XP_031077623.1/XP_031077586.1/XP_031077200.1/XP_031077138.1/XP_031080452.1/XP_031080665.1/XP_031079334.1/XP_031083630.1/XP_031087352.1/XP_031087361.1/XP_031089703.1/XP_031082647.1/XP_031082994.1/XP_031081471.1/XP_031081674.1/XP_031081705.1/XP_031086975.1/XP_031088206.1	22
BP	GO:0051128	regulation of cellular component organization	39/358	442/3915	0.625284	0.967231	0.967231	XP_031076197.1/XP_031076045.1/XP_031075968.1/XP_031075445.1/XP_031075390.1/XP_031075193.1/XP_031075082.1/XP_031074938.1/XP_031074765.1/XP_031077816.1/XP_031077753.1/XP_031077138.1/XP_031080135.1/XP_031080635.1/XP_031080695.1/XP_031080861.1/XP_031079517.1/XP_031084047.1/XP_031084018.1/XP_031083817.1/XP_031083630.1/XP_031087591.1/XP_031087641.1/XP_031082412.1/XP_031082799.1/XP_031082893.1/XP_031082…	39
BP	GO:1903047	mitotic cell cycle process	38/358	431/3915	0.626196	0.967231	0.967231	XP_031076249.1/XP_031076045.1/XP_031075390.1/XP_031075320.1/XP_031075215.1/XP_031075082.1/XP_031074938.1/XP_031074871.1/XP_031074765.1/XP_031077760.1/XP_031077613.1/XP_031077189.1/XP_031089054.1/XP_031080123.1/XP_031080452.1/XP_031080635.1/XP_031080695.1/XP_031080861.1/XP_031080895.1/XP_031080899.1/XP_031079334.1/XP_031084058.1/XP_031083817.1/XP_031083571.1/XP_031087411.1/XP_031087419.1/XP_031087…	38
BP	GO:0006401	RNA catabolic process	10/358	116/3915	0.627187	0.967231	0.967231	XP_031076197.1/XP_031076062.1/XP_031075445.1/XP_031077854.1/XP_031077291.1/XP_031077189.1/XP_031076955.1/XP_031079462.1/XP_031079233.1/XP_031082412.1	10
MF	GO:0097367	carbohydrate derivative binding	27/310	308/3385	0.630461	0.932611	0.932611	XP_031076045.1/XP_031075974.1/XP_031075320.1/XP_031075268.1/XP_031075017.1/XP_031075015.1/XP_031074813.1/XP_031074765.1/XP_031077724.1/XP_031077603.1/XP_031077189.1/XP_031077138.1/XP_031076636.1/XP_031080834.1/XP_031080861.1/XP_031079334.1/XP_031079044.1/XP_031083630.1/XP_031083543.1/XP_031087711.1/XP_031082568.1/XP_031082989.1/XP_031081471.1/XP_031081674.1/XP_031081814.1/XP_031088783.1/XP_031089…	27
CC	GO:0000131	incipient cellular bud site	4/343	47/3769	0.631224	0.964699	0.964699	XP_031075082.1/XP_031078096.1/XP_031080315.1/XP_031081814.1	4
BP	GO:0000209	protein polyubiquitination	3/358	35/3915	0.633322	0.967231	0.967231	XP_031080135.1/XP_031080895.1/XP_031082013.1	3
BP	GO:0009116	nucleoside metabolic process	3/358	35/3915	0.633322	0.967231	0.967231	XP_031077656.1/XP_031082436.1/XP_031083026.1	3
BP	GO:0009206	purine ribonucleoside triphosphate biosynthetic process	3/358	35/3915	0.633322	0.967231	0.967231	XP_031075629.1/XP_031077138.1/XP_031079702.1	3
BP	GO:0030448	hyphal growth	3/358	35/3915	0.633322	0.967231	0.967231	XP_031075883.1/XP_031087453.1/XP_031081814.1	3
BP	GO:0042144	vacuole fusion, non-autophagic	3/358	35/3915	0.633322	0.967231	0.967231	XP_031075982.1/XP_031087591.1/XP_031081814.1	3
BP	GO:0051310	metaphase plate congression	3/358	35/3915	0.633322	0.967231	0.967231	XP_031075390.1/XP_031074871.1/XP_031080695.1	3
BP	GO:1901699	cellular response to nitrogen compound	3/358	35/3915	0.633322	0.967231	0.967231	XP_031079334.1/XP_031082916.1/XP_031081529.1	3
CC	GO:0030532	small nuclear ribonucleoprotein complex	5/343	59/3769	0.634049	0.964699	0.964699	XP_031075769.1/XP_031075383.1/XP_031077430.1/XP_031080202.1/XP_031087072.1	5
MF	GO:0005509	calcium ion binding	3/310	35/3385	0.634543	0.932611	0.932611	XP_031075768.1/XP_031077613.1/XP_031078995.1	3
MF	GO:0046983	protein dimerization activity	3/310	35/3385	0.634543	0.932611	0.932611	XP_031083566.1/XP_031081548.1/XP_031081925.1	3
BP	GO:0006606	protein import into nucleus	4/358	47/3915	0.635061	0.967231	0.967231	XP_031076272.1/XP_031074809.1/XP_031077602.1/XP_031089703.1	4
BP	GO:0032784	regulation of DNA-templated transcription elongation	4/358	47/3915	0.635061	0.967231	0.967231	XP_031077854.1/XP_031077753.1/XP_031076955.1/XP_031080635.1	4
BP	GO:0000750	pheromone-dependent signal transduction involved in conjugation with cellular fusion	2/358	23/3915	0.635572	0.967231	0.967231	XP_031081814.1/XP_031081869.1	2
BP	GO:0006898	receptor-mediated endocytosis	2/358	23/3915	0.635572	0.967231	0.967231	XP_031077596.1/XP_031085409.1	2
BP	GO:0007266	Rho protein signal transduction	2/358	23/3915	0.635572	0.967231	0.967231	XP_031075082.1/XP_031081814.1	2
BP	GO:0031445	regulation of heterochromatin formation	2/358	23/3915	0.635572	0.967231	0.967231	XP_031082799.1/XP_031082893.1	2
BP	GO:0032273	positive regulation of protein polymerization	2/358	23/3915	0.635572	0.967231	0.967231	XP_031082939.1/XP_031088783.1	2
BP	GO:0032467	positive regulation of cytokinesis	2/358	23/3915	0.635572	0.967231	0.967231	XP_031075390.1/XP_031080695.1	2
BP	GO:0033262	regulation of nuclear cell cycle DNA replication	2/358	23/3915	0.635572	0.967231	0.967231	XP_031089054.1/XP_031083571.1	2
BP	GO:0070726	cell wall assembly	2/358	23/3915	0.635572	0.967231	0.967231	XP_031077613.1/XP_031088783.1	2
[truncated: 926 more rows]

## Sheet: ChIP-seq _BCP_vs_CK_GO_down
ONTOLOGY	ID	Description	GeneRatio	BgRatio	pvalue	p.adjust	qvalue	geneID	Count
[truncated: 2,156 more rows]

## Sheet: ChIP-seq _BCP_vs_CK_KEGG_up
ID	Description	GeneRatio	BgRatio	pvalue	p.adjust	qvalue	geneID	Count
[truncated: 234 more rows]

[truncated: 1 more sheets: ChIP-seq _BCP_vs_CK_KEGG_down]
